# Supplementary material for: One-shot analysis of translated mammalian lncRNAs with AHARIBO
Source: eLife. 2021 Feb 17;10:e59303. doi: 10.7554/eLife.59303 (PMC7932693; doi:10.7554/eLife.59303)
Supplement: Figure 1—source data 2. [file elife-59303-fig1-data2.xlsx]

## Sheet: GO_biological process
GO Term	Description	FDR q-value	Genes
GO:0006412	translation	1.13e-16	[RPL26 - ribosomal protein l26, RPL24 - ribosomal protein l24, RPL23A - ribosomal protein l23a, RPL21 - ribosomal protein l21, RPL19 - ribosomal protein l19, RPL18A - ribosomal protein l18a, RPL18 - ribosomal protein l18, RPL15 - ribosomal protein l15, RPL13 - ribosomal protein l13, RPL12 - ribosomal protein l12, RPL11 - ribosomal protein l11, RPL9 - ribosomal protein l9, ABCF1 - atp-binding cass…
GO:0043043	peptide biosynthetic process	2.96e-16	[RPL26 - ribosomal protein l26, RPL24 - ribosomal protein l24, RPL23A - ribosomal protein l23a, RPL21 - ribosomal protein l21, RPL19 - ribosomal protein l19, RPL18A - ribosomal protein l18a, RPL18 - ribosomal protein l18, RPL15 - ribosomal protein l15, RPL13 - ribosomal protein l13, RPL12 - ribosomal protein l12, RPL11 - ribosomal protein l11, ABCF1 - atp-binding cassette, sub-family f (gcn20), m…
GO:0006518	peptide metabolic process	9.6e-16	[RPL26 - ribosomal protein l26, RPL24 - ribosomal protein l24, RPL23A - ribosomal protein l23a, RPL21 - ribosomal protein l21, RPL19 - ribosomal protein l19, RPL18A - ribosomal protein l18a, RPL18 - ribosomal protein l18, RPL15 - ribosomal protein l15, RPL13 - ribosomal protein l13, RPL12 - ribosomal protein l12, RPL11 - ribosomal protein l11, RPL9 - ribosomal protein l9, ABCF1 - atp-binding cass…
GO:0006413	translational initiation	4.26e-15	[RPL26 - ribosomal protein l26, RPL24 - ribosomal protein l24, RPL23A - ribosomal protein l23a, DDX3X - dead (asp-glu-ala-asp) box helicase 3, x-linked, RPL21 - ribosomal protein l21, RPL19 - ribosomal protein l19, RPL18A - ribosomal protein l18a, RPL18 - ribosomal protein l18, RPL15 - ribosomal protein l15, RPL13 - ribosomal protein l13, RPL12 - ribosomal protein l12, RPL11 - ribosomal protein l…
GO:0019083	viral transcription	7.74e-15	[DHX9 - deah (asp-glu-ala-his) box helicase 9, RPL26 - ribosomal protein l26, RPL24 - ribosomal protein l24, RPL23A - ribosomal protein l23a, RPL21 - ribosomal protein l21, RPL19 - ribosomal protein l19, RPL18A - ribosomal protein l18a, RPL18 - ribosomal protein l18, RPL15 - ribosomal protein l15, RPL13 - ribosomal protein l13, RPL12 - ribosomal protein l12, RPL11 - ribosomal protein l11, RPL9 - …
GO:0006612	protein targeting to membrane	9.45e-15	[RPL26 - ribosomal protein l26, RPL24 - ribosomal protein l24, RPL23A - ribosomal protein l23a, RPL21 - ribosomal protein l21, RPL19 - ribosomal protein l19, RPL18A - ribosomal protein l18a, RPL18 - ribosomal protein l18, RPL15 - ribosomal protein l15, RPL13 - ribosomal protein l13, RPL12 - ribosomal protein l12, RPL11 - ribosomal protein l11, RPL9 - ribosomal protein l9, RPL10 - ribosomal protei…
GO:0090150	establishment of protein localization to membrane	8.1e-15	[RPL26 - ribosomal protein l26, RPL24 - ribosomal protein l24, RPL23A - ribosomal protein l23a, RPL21 - ribosomal protein l21, RPL19 - ribosomal protein l19, RPL18A - ribosomal protein l18a, RPL18 - ribosomal protein l18, RPL15 - ribosomal protein l15, RPL13 - ribosomal protein l13, RPL12 - ribosomal protein l12, RPL11 - ribosomal protein l11, RPL9 - ribosomal protein l9, RPL10 - ribosomal protei…
GO:0006614	SRP-dependent cotranslational protein targeting to membrane	8.9e-15	[RPL26 - ribosomal protein l26, RPL24 - ribosomal protein l24, RPL23A - ribosomal protein l23a, RPL21 - ribosomal protein l21, RPL19 - ribosomal protein l19, RPL18A - ribosomal protein l18a, RPL18 - ribosomal protein l18, RPL15 - ribosomal protein l15, RPL13 - ribosomal protein l13, RPL12 - ribosomal protein l12, RPL11 - ribosomal protein l11, RPL9 - ribosomal protein l9, RPL10 - ribosomal protei…
GO:0045047	protein targeting to ER	7.91e-15	[RPL26 - ribosomal protein l26, RPL24 - ribosomal protein l24, RPL23A - ribosomal protein l23a, RPL21 - ribosomal protein l21, RPL19 - ribosomal protein l19, RPL18A - ribosomal protein l18a, RPL18 - ribosomal protein l18, RPL15 - ribosomal protein l15, RPL13 - ribosomal protein l13, RPL12 - ribosomal protein l12, RPL11 - ribosomal protein l11, RPL9 - ribosomal protein l9, RPL10 - ribosomal protei…
GO:0072599	establishment of protein localization to endoplasmic reticulum	7.12e-15	[RPL26 - ribosomal protein l26, RPL24 - ribosomal protein l24, RPL23A - ribosomal protein l23a, RPL21 - ribosomal protein l21, RPL19 - ribosomal protein l19, RPL18A - ribosomal protein l18a, RPL18 - ribosomal protein l18, RPL15 - ribosomal protein l15, RPL13 - ribosomal protein l13, RPL12 - ribosomal protein l12, RPL11 - ribosomal protein l11, RPL9 - ribosomal protein l9, RPL10 - ribosomal protei…
GO:0070972	protein localization to endoplasmic reticulum	6.47e-15	[RPL26 - ribosomal protein l26, RPL24 - ribosomal protein l24, RPL23A - ribosomal protein l23a, RPL21 - ribosomal protein l21, RPL19 - ribosomal protein l19, RPL18A - ribosomal protein l18a, RPL18 - ribosomal protein l18, RPL15 - ribosomal protein l15, RPL13 - ribosomal protein l13, RPL12 - ribosomal protein l12, RPL11 - ribosomal protein l11, RPL9 - ribosomal protein l9, RPL10 - ribosomal protei…
GO:0006613	cotranslational protein targeting to membrane	2.83e-14	[RPL26 - ribosomal protein l26, RPL24 - ribosomal protein l24, RPL23A - ribosomal protein l23a, RPL21 - ribosomal protein l21, RPL19 - ribosomal protein l19, RPL18A - ribosomal protein l18a, RPL18 - ribosomal protein l18, RPL15 - ribosomal protein l15, RPL13 - ribosomal protein l13, RPL12 - ribosomal protein l12, RPL11 - ribosomal protein l11, RPL9 - ribosomal protein l9, RPL10 - ribosomal protei…
GO:0010629	negative regulation of gene expression	6.4e-14	[A2M - alpha-2-macroglobulin, FMR1 - fragile x mental retardation 1, DDX6 - dead (asp-glu-ala-asp) box helicase 6, DDX5 - dead (asp-glu-ala-asp) box helicase 5, DDX3X - dead (asp-glu-ala-asp) box helicase 3, x-linked, NCL - nucleolin, RFC1 - replication factor c (activator 1) 1, 145kda, UHRF1 - ubiquitin-like with phd and ring finger domains 1, ZCCHC6 - zinc finger, cchc domain containing 6, RBMX…
GO:0000184	nuclear-transcribed mRNA catabolic process, nonsense-mediated decay	7.84e-14	[RPL26 - ribosomal protein l26, RPL24 - ribosomal protein l24, RPL23A - ribosomal protein l23a, RPL21 - ribosomal protein l21, RPL19 - ribosomal protein l19, RPL18A - ribosomal protein l18a, RPL18 - ribosomal protein l18, RPL15 - ribosomal protein l15, RPL13 - ribosomal protein l13, RPL12 - ribosomal protein l12, RPL11 - ribosomal protein l11, RPL9 - ribosomal protein l9, RPL10 - ribosomal protei…
GO:0043604	amide biosynthetic process	8.69e-14	[RPL26 - ribosomal protein l26, RPL24 - ribosomal protein l24, RPL23A - ribosomal protein l23a, RPL21 - ribosomal protein l21, RPL19 - ribosomal protein l19, RPL18A - ribosomal protein l18a, RPL18 - ribosomal protein l18, RPL15 - ribosomal protein l15, RPL13 - ribosomal protein l13, RPL12 - ribosomal protein l12, RPL11 - ribosomal protein l11, RPL9 - ribosomal protein l9, ABCF1 - atp-binding cass…
GO:0034645	cellular macromolecule biosynthetic process	1.38e-13	[DHX9 - deah (asp-glu-ala-his) box helicase 9, RFC5 - replication factor c (activator 1) 5, 36.5kda, DDX5 - dead (asp-glu-ala-asp) box helicase 5, RFC1 - replication factor c (activator 1) 1, 145kda, RBMX - rna binding motif protein, x-linked, ABCF1 - atp-binding cassette, sub-family f (gcn20), member 1, GEMIN5 - gem (nuclear organelle) associated protein 5, UPF1 - upf1 regulator of nonsense tran…
GO:0000956	nuclear-transcribed mRNA catabolic process	6.2e-13	[RPL26 - ribosomal protein l26, RPL24 - ribosomal protein l24, DDX6 - dead (asp-glu-ala-asp) box helicase 6, DDX5 - dead (asp-glu-ala-asp) box helicase 5, RPL23A - ribosomal protein l23a, RPL21 - ribosomal protein l21, RPL19 - ribosomal protein l19, RPL18A - ribosomal protein l18a, RPL18 - ribosomal protein l18, MRTO4 - mrna turnover 4 homolog (s. cerevisiae), RPL15 - ribosomal protein l15, ZCCHC…
GO:0010468	regulation of gene expression	6.45e-13	[A2M - alpha-2-macroglobulin, PRDX6 - peroxiredoxin 6, NCL - nucleolin, RFC1 - replication factor c (activator 1) 1, 145kda, UHRF1 - ubiquitin-like with phd and ring finger domains 1, HNRNPM - heterogeneous nuclear ribonucleoprotein m, UPF1 - upf1 regulator of nonsense transcripts homolog (yeast), ENO1 - enolase 1, (alpha), MTDH - metadherin, ZC3HAV1 - zinc finger ccch-type, antiviral 1, ELAVL1 -…
GO:0006605	protein targeting	8.7e-13	[RPL26 - ribosomal protein l26, RPL24 - ribosomal protein l24, RPL23A - ribosomal protein l23a, RPL21 - ribosomal protein l21, RPL19 - ribosomal protein l19, RPL18A - ribosomal protein l18a, RPL18 - ribosomal protein l18, RPL15 - ribosomal protein l15, RPL13 - ribosomal protein l13, RPL12 - ribosomal protein l12, RPL11 - ribosomal protein l11, RPL9 - ribosomal protein l9, RPL10 - ribosomal protei…
GO:0006402	mRNA catabolic process	1.74e-12	[RPL26 - ribosomal protein l26, RPL24 - ribosomal protein l24, DDX6 - dead (asp-glu-ala-asp) box helicase 6, DDX5 - dead (asp-glu-ala-asp) box helicase 5, RPL23A - ribosomal protein l23a, RPL21 - ribosomal protein l21, RPL19 - ribosomal protein l19, RPL18A - ribosomal protein l18a, RPL18 - ribosomal protein l18, RPL15 - ribosomal protein l15, MRTO4 - mrna turnover 4 homolog (s. cerevisiae), RPL13…
GO:0090304	nucleic acid metabolic process	3.5e-12	[DHX9 - deah (asp-glu-ala-his) box helicase 9, FMR1 - fragile x mental retardation 1, DDX6 - dead (asp-glu-ala-asp) box helicase 6, RFC5 - replication factor c (activator 1) 5, 36.5kda, DDX5 - dead (asp-glu-ala-asp) box helicase 5, DDX3X - dead (asp-glu-ala-asp) box helicase 3, x-linked, G3BP1 - gtpase activating protein (sh3 domain) binding protein 1, CDC5L - cell division cycle 5-like, DDX1 - d…
GO:0010605	negative regulation of macromolecule metabolic process	3.38e-12	[DHX9 - deah (asp-glu-ala-his) box helicase 9, A2M - alpha-2-macroglobulin, FMR1 - fragile x mental retardation 1, DDX6 - dead (asp-glu-ala-asp) box helicase 6, DDX5 - dead (asp-glu-ala-asp) box helicase 5, DDX3X - dead (asp-glu-ala-asp) box helicase 3, x-linked, DTX3L - deltex 3-like (drosophila), RFC1 - replication factor c (activator 1) 1, 145kda, NCL - nucleolin, UHRF1 - ubiquitin-like with p…
GO:0009059	macromolecule biosynthetic process	7.05e-12	[DHX9 - deah (asp-glu-ala-his) box helicase 9, RFC5 - replication factor c (activator 1) 5, 36.5kda, DDX5 - dead (asp-glu-ala-asp) box helicase 5, RFC1 - replication factor c (activator 1) 1, 145kda, RBMX - rna binding motif protein, x-linked, ABCF1 - atp-binding cassette, sub-family f (gcn20), member 1, GEMIN5 - gem (nuclear organelle) associated protein 5, UPF1 - upf1 regulator of nonsense tran…
GO:0006401	RNA catabolic process	8.29e-12	[RPL26 - ribosomal protein l26, RPL24 - ribosomal protein l24, DDX6 - dead (asp-glu-ala-asp) box helicase 6, DDX5 - dead (asp-glu-ala-asp) box helicase 5, RPL23A - ribosomal protein l23a, RPL21 - ribosomal protein l21, RPL19 - ribosomal protein l19, RPL18A - ribosomal protein l18a, RPL18 - ribosomal protein l18, MRTO4 - mrna turnover 4 homolog (s. cerevisiae), RPL15 - ribosomal protein l15, RPL13…
GO:0072594	establishment of protein localization to organelle	9.1e-12	[RPL26 - ribosomal protein l26, RPL24 - ribosomal protein l24, RPL23A - ribosomal protein l23a, RPL21 - ribosomal protein l21, RPL19 - ribosomal protein l19, RPL18A - ribosomal protein l18a, RPL18 - ribosomal protein l18, RPL15 - ribosomal protein l15, RPL13 - ribosomal protein l13, RPL12 - ribosomal protein l12, RPL11 - ribosomal protein l11, RPL9 - ribosomal protein l9, RPL10 - ribosomal protei…
GO:0072657	protein localization to membrane	8.75e-12	[RPL26 - ribosomal protein l26, RPL24 - ribosomal protein l24, RPL23A - ribosomal protein l23a, RPL21 - ribosomal protein l21, RPL19 - ribosomal protein l19, RPL18A - ribosomal protein l18a, RPL18 - ribosomal protein l18, RPL15 - ribosomal protein l15, RPL13 - ribosomal protein l13, RPL12 - ribosomal protein l12, RPL11 - ribosomal protein l11, RPL9 - ribosomal protein l9, RPL10 - ribosomal protei…
GO:0016032	viral process	1.17e-11	[RPL26 - ribosomal protein l26, DHX9 - deah (asp-glu-ala-his) box helicase 9, FMR1 - fragile x mental retardation 1, RPL23A - ribosomal protein l23a, G3BP1 - gtpase activating protein (sh3 domain) binding protein 1, DDX3X - dead (asp-glu-ala-asp) box helicase 3, x-linked, RPL18A - ribosomal protein l18a, RPL15 - ribosomal protein l15, RPL13 - ribosomal protein l13, RPL12 - ribosomal protein l12, …
GO:0044403	symbiont process	1.13e-11	[RPL26 - ribosomal protein l26, DHX9 - deah (asp-glu-ala-his) box helicase 9, FMR1 - fragile x mental retardation 1, RPL23A - ribosomal protein l23a, DDX3X - dead (asp-glu-ala-asp) box helicase 3, x-linked, G3BP1 - gtpase activating protein (sh3 domain) binding protein 1, RPL18A - ribosomal protein l18a, RPL15 - ribosomal protein l15, RPL13 - ribosomal protein l13, RPL12 - ribosomal protein l12, …
GO:0043603	cellular amide metabolic process	1.78e-11	[RPL26 - ribosomal protein l26, RPL23A - ribosomal protein l23a, RPL18A - ribosomal protein l18a, RPL15 - ribosomal protein l15, RPL13 - ribosomal protein l13, RPL12 - ribosomal protein l12, RPL11 - ribosomal protein l11, RPL9 - ribosomal protein l9, ABCF1 - atp-binding cassette, sub-family f (gcn20), member 1, RPL10 - ribosomal protein l10, RPL7A - ribosomal protein l7a, RPL8 - ribosomal protein…
GO:0033365	protein localization to organelle	1.98e-11	[DHX9 - deah (asp-glu-ala-his) box helicase 9, RPL26 - ribosomal protein l26, RPL23A - ribosomal protein l23a, DDX3X - dead (asp-glu-ala-asp) box helicase 3, x-linked, DDX1 - dead (asp-glu-ala-asp) box helicase 1, RPL18A - ribosomal protein l18a, RPL15 - ribosomal protein l15, RPL13 - ribosomal protein l13, RPL12 - ribosomal protein l12, RPL11 - ribosomal protein l11, RPL9 - ribosomal protein l9,…
GO:0044265	cellular macromolecule catabolic process	2.75e-11	[RPL26 - ribosomal protein l26, AP2A1 - adaptor-related protein complex 2, alpha 1 subunit, RPL24 - ribosomal protein l24, DDX6 - dead (asp-glu-ala-asp) box helicase 6, RPL23A - ribosomal protein l23a, DDX5 - dead (asp-glu-ala-asp) box helicase 5, DTX3L - deltex 3-like (drosophila), RPL21 - ribosomal protein l21, RPL19 - ribosomal protein l19, RPL18A - ribosomal protein l18a, RPL18 - ribosomal pr…
GO:0009892	negative regulation of metabolic process	3.52e-11	[DHX9 - deah (asp-glu-ala-his) box helicase 9, A2M - alpha-2-macroglobulin, FMR1 - fragile x mental retardation 1, DDX6 - dead (asp-glu-ala-asp) box helicase 6, DDX5 - dead (asp-glu-ala-asp) box helicase 5, DDX3X - dead (asp-glu-ala-asp) box helicase 3, x-linked, DTX3L - deltex 3-like (drosophila), RFC1 - replication factor c (activator 1) 1, 145kda, NCL - nucleolin, UHRF1 - ubiquitin-like with p…
GO:0016070	RNA metabolic process	3.77e-11	[DHX9 - deah (asp-glu-ala-his) box helicase 9, FMR1 - fragile x mental retardation 1, DDX6 - dead (asp-glu-ala-asp) box helicase 6, TCOF1 - treacher collins-franceschetti syndrome 1, DDX5 - dead (asp-glu-ala-asp) box helicase 5, DDX3X - dead (asp-glu-ala-asp) box helicase 3, x-linked, CDC5L - cell division cycle 5-like, DDX1 - dead (asp-glu-ala-asp) box helicase 1, RBM39 - rna binding motif prote…
GO:0006886	intracellular protein transport	6.56e-11	[RPL26 - ribosomal protein l26, RPL24 - ribosomal protein l24, PURA - purine-rich element binding protein a, AP2A1 - adaptor-related protein complex 2, alpha 1 subunit, RPL23A - ribosomal protein l23a, RPL21 - ribosomal protein l21, RPL19 - ribosomal protein l19, RPL18A - ribosomal protein l18a, RPL18 - ribosomal protein l18, RPL15 - ribosomal protein l15, RPL13 - ribosomal protein l13, RPL12 - r…
GO:0016071	mRNA metabolic process	1e-10	[DHX9 - deah (asp-glu-ala-his) box helicase 9, DDX6 - dead (asp-glu-ala-asp) box helicase 6, FMR1 - fragile x mental retardation 1, DDX5 - dead (asp-glu-ala-asp) box helicase 5, RBM39 - rna binding motif protein 39, CDC5L - cell division cycle 5-like, ZCCHC6 - zinc finger, cchc domain containing 6, RBMX - rna binding motif protein, x-linked, HNRNPM - heterogeneous nuclear ribonucleoprotein m, GTF…
GO:0044419	interspecies interaction between organisms	1.53e-10	[RPL26 - ribosomal protein l26, DHX9 - deah (asp-glu-ala-his) box helicase 9, FMR1 - fragile x mental retardation 1, RPL23A - ribosomal protein l23a, G3BP1 - gtpase activating protein (sh3 domain) binding protein 1, DDX3X - dead (asp-glu-ala-asp) box helicase 3, x-linked, RPL18A - ribosomal protein l18a, RPL15 - ribosomal protein l15, RPL13 - ribosomal protein l13, RPL12 - ribosomal protein l12, …
GO:0051704	multi-organism process	1.82e-10	[DHX9 - deah (asp-glu-ala-his) box helicase 9, RPL26 - ribosomal protein l26, HNRNPUL1 - heterogeneous nuclear ribonucleoprotein u-like 1, FMR1 - fragile x mental retardation 1, RPL23A - ribosomal protein l23a, IFI16 - interferon, gamma-inducible protein 16, DDX3X - dead (asp-glu-ala-asp) box helicase 3, x-linked, G3BP1 - gtpase activating protein (sh3 domain) binding protein 1, DTX3L - deltex 3-…
GO:0060255	regulation of macromolecule metabolic process	2.12e-10	[A2M - alpha-2-macroglobulin, PRDX6 - peroxiredoxin 6, RFC5 - replication factor c (activator 1) 5, 36.5kda, NCL - nucleolin, RFC1 - replication factor c (activator 1) 1, 145kda, UHRF1 - ubiquitin-like with phd and ring finger domains 1, HNRNPM - heterogeneous nuclear ribonucleoprotein m, UPF1 - upf1 regulator of nonsense transcripts homolog (yeast), DERL1 - derlin 1, ENO1 - enolase 1, (alpha), M…
GO:0044271	cellular nitrogen compound biosynthetic process	7.65e-10	[DHX9 - deah (asp-glu-ala-his) box helicase 9, RFC5 - replication factor c (activator 1) 5, 36.5kda, DDX5 - dead (asp-glu-ala-asp) box helicase 5, RFC1 - replication factor c (activator 1) 1, 145kda, RBMX - rna binding motif protein, x-linked, ABCF1 - atp-binding cassette, sub-family f (gcn20), member 1, GEMIN5 - gem (nuclear organelle) associated protein 5, ILF2 - interleukin enhancer binding fa…
GO:0006139	nucleobase-containing compound metabolic process	1.12e-09	[DHX9 - deah (asp-glu-ala-his) box helicase 9, FMR1 - fragile x mental retardation 1, DDX6 - dead (asp-glu-ala-asp) box helicase 6, RFC5 - replication factor c (activator 1) 5, 36.5kda, DDX5 - dead (asp-glu-ala-asp) box helicase 5, DDX3X - dead (asp-glu-ala-asp) box helicase 3, x-linked, G3BP1 - gtpase activating protein (sh3 domain) binding protein 1, CDC5L - cell division cycle 5-like, DDX1 - d…
GO:0034655	nucleobase-containing compound catabolic process	2.06e-09	[RPL26 - ribosomal protein l26, RPL24 - ribosomal protein l24, DDX6 - dead (asp-glu-ala-asp) box helicase 6, DDX5 - dead (asp-glu-ala-asp) box helicase 5, RPL23A - ribosomal protein l23a, RPL21 - ribosomal protein l21, RPL19 - ribosomal protein l19, RPL18A - ribosomal protein l18a, RPL18 - ribosomal protein l18, RPL15 - ribosomal protein l15, MRTO4 - mrna turnover 4 homolog (s. cerevisiae), RPL13…
GO:0006725	cellular aromatic compound metabolic process	3.16e-09	[DHX9 - deah (asp-glu-ala-his) box helicase 9, DDX6 - dead (asp-glu-ala-asp) box helicase 6, FMR1 - fragile x mental retardation 1, RFC5 - replication factor c (activator 1) 5, 36.5kda, DDX5 - dead (asp-glu-ala-asp) box helicase 5, DDX3X - dead (asp-glu-ala-asp) box helicase 3, x-linked, G3BP1 - gtpase activating protein (sh3 domain) binding protein 1, DTX3L - deltex 3-like (drosophila), DDX1 - d…
GO:0034641	cellular nitrogen compound metabolic process	4.34e-09	[DHX9 - deah (asp-glu-ala-his) box helicase 9, DDX6 - dead (asp-glu-ala-asp) box helicase 6, FMR1 - fragile x mental retardation 1, RFC5 - replication factor c (activator 1) 5, 36.5kda, DDX5 - dead (asp-glu-ala-asp) box helicase 5, DDX3X - dead (asp-glu-ala-asp) box helicase 3, x-linked, G3BP1 - gtpase activating protein (sh3 domain) binding protein 1, DTX3L - deltex 3-like (drosophila), DDX1 - d…
GO:0044270	cellular nitrogen compound catabolic process	4.3e-09	[RPL26 - ribosomal protein l26, RPL24 - ribosomal protein l24, DDX6 - dead (asp-glu-ala-asp) box helicase 6, DDX5 - dead (asp-glu-ala-asp) box helicase 5, RPL23A - ribosomal protein l23a, RPL21 - ribosomal protein l21, RPL19 - ribosomal protein l19, RPL18A - ribosomal protein l18a, RPL18 - ribosomal protein l18, MRTO4 - mrna turnover 4 homolog (s. cerevisiae), RPL15 - ribosomal protein l15, RPL13…
GO:0046700	heterocycle catabolic process	4.21e-09	[RPL26 - ribosomal protein l26, RPL24 - ribosomal protein l24, DDX6 - dead (asp-glu-ala-asp) box helicase 6, DDX5 - dead (asp-glu-ala-asp) box helicase 5, RPL23A - ribosomal protein l23a, RPL21 - ribosomal protein l21, RPL19 - ribosomal protein l19, RPL18A - ribosomal protein l18a, RPL18 - ribosomal protein l18, MRTO4 - mrna turnover 4 homolog (s. cerevisiae), RPL15 - ribosomal protein l15, RPL13…
GO:0009057	macromolecule catabolic process	4.83e-09	[RPL26 - ribosomal protein l26, RPL24 - ribosomal protein l24, AP2A1 - adaptor-related protein complex 2, alpha 1 subunit, DDX6 - dead (asp-glu-ala-asp) box helicase 6, RPL23A - ribosomal protein l23a, DDX5 - dead (asp-glu-ala-asp) box helicase 5, DTX3L - deltex 3-like (drosophila), RPL21 - ribosomal protein l21, RPL19 - ribosomal protein l19, RPL18A - ribosomal protein l18a, RPL18 - ribosomal pr…
GO:0046483	heterocycle metabolic process	5.36e-09	[DHX9 - deah (asp-glu-ala-his) box helicase 9, DDX6 - dead (asp-glu-ala-asp) box helicase 6, FMR1 - fragile x mental retardation 1, RFC5 - replication factor c (activator 1) 5, 36.5kda, DDX5 - dead (asp-glu-ala-asp) box helicase 5, DDX3X - dead (asp-glu-ala-asp) box helicase 3, x-linked, G3BP1 - gtpase activating protein (sh3 domain) binding protein 1, DTX3L - deltex 3-like (drosophila), DDX1 - d…
GO:0034613	cellular protein localization	5.8e-09	[DHX9 - deah (asp-glu-ala-his) box helicase 9, RPL26 - ribosomal protein l26, RPL23A - ribosomal protein l23a, DDX3X - dead (asp-glu-ala-asp) box helicase 3, x-linked, DDX1 - dead (asp-glu-ala-asp) box helicase 1, RPL18A - ribosomal protein l18a, RPL15 - ribosomal protein l15, RPL13 - ribosomal protein l13, RPL12 - ribosomal protein l12, RPL11 - ribosomal protein l11, RPL9 - ribosomal protein l9,…
GO:0070727	cellular macromolecule localization	5.68e-09	[DHX9 - deah (asp-glu-ala-his) box helicase 9, RPL26 - ribosomal protein l26, RPL23A - ribosomal protein l23a, DDX3X - dead (asp-glu-ala-asp) box helicase 3, x-linked, DDX1 - dead (asp-glu-ala-asp) box helicase 1, RPL18A - ribosomal protein l18a, RPL15 - ribosomal protein l15, RPL13 - ribosomal protein l13, RPL12 - ribosomal protein l12, RPL11 - ribosomal protein l11, RPL9 - ribosomal protein l9,…
GO:0071705	nitrogen compound transport	6.62e-09	[RPL26 - ribosomal protein l26, DHX9 - deah (asp-glu-ala-his) box helicase 9, FMR1 - fragile x mental retardation 1, RPL23A - ribosomal protein l23a, DTX3L - deltex 3-like (drosophila), RPL18A - ribosomal protein l18a, RPL15 - ribosomal protein l15, RPL13 - ribosomal protein l13, RPL12 - ribosomal protein l12, RPL11 - ribosomal protein l11, RPL9 - ribosomal protein l9, RPL10 - ribosomal protein l…
GO:0019439	aromatic compound catabolic process	8.51e-09	[RPL26 - ribosomal protein l26, RPL24 - ribosomal protein l24, DDX6 - dead (asp-glu-ala-asp) box helicase 6, DDX5 - dead (asp-glu-ala-asp) box helicase 5, RPL23A - ribosomal protein l23a, RPL21 - ribosomal protein l21, RPL19 - ribosomal protein l19, RPL18A - ribosomal protein l18a, RPL18 - ribosomal protein l18, MRTO4 - mrna turnover 4 homolog (s. cerevisiae), RPL15 - ribosomal protein l15, RPL13…
GO:1901361	organic cyclic compound catabolic process	8.35e-09	[RPL26 - ribosomal protein l26, RPL24 - ribosomal protein l24, DDX6 - dead (asp-glu-ala-asp) box helicase 6, DDX5 - dead (asp-glu-ala-asp) box helicase 5, RPL23A - ribosomal protein l23a, RPL21 - ribosomal protein l21, RPL19 - ribosomal protein l19, RPL18A - ribosomal protein l18a, RPL18 - ribosomal protein l18, MRTO4 - mrna turnover 4 homolog (s. cerevisiae), RPL15 - ribosomal protein l15, RPL13…
GO:0046907	intracellular transport	1.23e-08	[RPL26 - ribosomal protein l26, RPL23A - ribosomal protein l23a, DTX3L - deltex 3-like (drosophila), RPL18A - ribosomal protein l18a, RPL15 - ribosomal protein l15, RPL13 - ribosomal protein l13, RPL12 - ribosomal protein l12, RPL11 - ribosomal protein l11, RPL9 - ribosomal protein l9, RPL10 - ribosomal protein l10, RPL7A - ribosomal protein l7a, RPL8 - ribosomal protein l8, RPL6 - ribosomal prot…
GO:0051649	establishment of localization in cell	3.44e-08	[RPL26 - ribosomal protein l26, RPL23A - ribosomal protein l23a, DTX3L - deltex 3-like (drosophila), RPL18A - ribosomal protein l18a, RPL15 - ribosomal protein l15, RPL13 - ribosomal protein l13, RPL12 - ribosomal protein l12, RPL11 - ribosomal protein l11, RPL9 - ribosomal protein l9, RPL10 - ribosomal protein l10, RPL7A - ribosomal protein l7a, RPL8 - ribosomal protein l8, RPL6 - ribosomal prot…
GO:0071702	organic substance transport	3.43e-08	[RPL26 - ribosomal protein l26, DHX9 - deah (asp-glu-ala-his) box helicase 9, FMR1 - fragile x mental retardation 1, RPL23A - ribosomal protein l23a, DTX3L - deltex 3-like (drosophila), RPL18A - ribosomal protein l18a, RPL15 - ribosomal protein l15, RPL13 - ribosomal protein l13, RPL12 - ribosomal protein l12, RPL11 - ribosomal protein l11, RPL9 - ribosomal protein l9, RPL10 - ribosomal protein l…
GO:1901360	organic cyclic compound metabolic process	3.41e-08	[DHX9 - deah (asp-glu-ala-his) box helicase 9, DDX6 - dead (asp-glu-ala-asp) box helicase 6, FMR1 - fragile x mental retardation 1, RFC5 - replication factor c (activator 1) 5, 36.5kda, DDX5 - dead (asp-glu-ala-asp) box helicase 5, DDX3X - dead (asp-glu-ala-asp) box helicase 3, x-linked, G3BP1 - gtpase activating protein (sh3 domain) binding protein 1, DTX3L - deltex 3-like (drosophila), DDX1 - d…
GO:0019222	regulation of metabolic process	3.54e-08	[A2M - alpha-2-macroglobulin, PRDX6 - peroxiredoxin 6, RFC5 - replication factor c (activator 1) 5, 36.5kda, RFC1 - replication factor c (activator 1) 1, 145kda, NCL - nucleolin, UHRF1 - ubiquitin-like with phd and ring finger domains 1, HNRNPM - heterogeneous nuclear ribonucleoprotein m, UPF1 - upf1 regulator of nonsense transcripts homolog (yeast), DERL1 - derlin 1, ENO1 - enolase 1, (alpha), M…
GO:0015833	peptide transport	9.59e-08	[RPL26 - ribosomal protein l26, RPL23A - ribosomal protein l23a, DTX3L - deltex 3-like (drosophila), RPL18A - ribosomal protein l18a, RPL15 - ribosomal protein l15, RPL13 - ribosomal protein l13, RPL12 - ribosomal protein l12, RPL11 - ribosomal protein l11, RPL9 - ribosomal protein l9, RPL10 - ribosomal protein l10, RPL7A - ribosomal protein l7a, RPL8 - ribosomal protein l8, RPL6 - ribosomal prot…
GO:0015031	protein transport	9.42e-08	[RPL26 - ribosomal protein l26, RPL23A - ribosomal protein l23a, DTX3L - deltex 3-like (drosophila), RPL18A - ribosomal protein l18a, RPL15 - ribosomal protein l15, RPL13 - ribosomal protein l13, RPL12 - ribosomal protein l12, RPL11 - ribosomal protein l11, RPL9 - ribosomal protein l9, RPL10 - ribosomal protein l10, RPL7A - ribosomal protein l7a, RPL8 - ribosomal protein l8, RPL6 - ribosomal prot…
GO:0042886	amide transport	9.27e-08	[RPL26 - ribosomal protein l26, RPL23A - ribosomal protein l23a, DTX3L - deltex 3-like (drosophila), RPL18A - ribosomal protein l18a, RPL15 - ribosomal protein l15, RPL13 - ribosomal protein l13, RPL12 - ribosomal protein l12, RPL11 - ribosomal protein l11, RPL9 - ribosomal protein l9, RPL10 - ribosomal protein l10, RPL7A - ribosomal protein l7a, RPL8 - ribosomal protein l8, RPL6 - ribosomal prot…
GO:0045184	establishment of protein localization	2.8e-07	[RPL26 - ribosomal protein l26, RPL23A - ribosomal protein l23a, DTX3L - deltex 3-like (drosophila), RPL18A - ribosomal protein l18a, RPL15 - ribosomal protein l15, RPL13 - ribosomal protein l13, RPL12 - ribosomal protein l12, RPL11 - ribosomal protein l11, RPL9 - ribosomal protein l9, RPL10 - ribosomal protein l10, RPL7A - ribosomal protein l7a, RPL8 - ribosomal protein l8, RPL6 - ribosomal prot…
GO:0022618	ribonucleoprotein complex assembly	2.8e-07	[DHX9 - deah (asp-glu-ala-his) box helicase 9, RPS23 - ribosomal protein s23, DDX6 - dead (asp-glu-ala-asp) box helicase 6, RPL23A - ribosomal protein l23a, G3BP1 - gtpase activating protein (sh3 domain) binding protein 1, DDX3X - dead (asp-glu-ala-asp) box helicase 3, x-linked, ATXN2L - ataxin 2-like, DDX1 - dead (asp-glu-ala-asp) box helicase 1, ATXN2 - ataxin 2, DHX30 - deah (asp-glu-ala-his) …
GO:1901566	organonitrogen compound biosynthetic process	4.51e-07	[RPL26 - ribosomal protein l26, RPL23A - ribosomal protein l23a, RPL18A - ribosomal protein l18a, RPL15 - ribosomal protein l15, RPL13 - ribosomal protein l13, RPL12 - ribosomal protein l12, RPL11 - ribosomal protein l11, RPL9 - ribosomal protein l9, ABCF1 - atp-binding cassette, sub-family f (gcn20), member 1, RPL10 - ribosomal protein l10, RPL7A - ribosomal protein l7a, RPL8 - ribosomal protein…
GO:0071826	ribonucleoprotein complex subunit organization	4.77e-07	[DHX9 - deah (asp-glu-ala-his) box helicase 9, RPS23 - ribosomal protein s23, DDX6 - dead (asp-glu-ala-asp) box helicase 6, RPL23A - ribosomal protein l23a, G3BP1 - gtpase activating protein (sh3 domain) binding protein 1, DDX3X - dead (asp-glu-ala-asp) box helicase 3, x-linked, ATXN2L - ataxin 2-like, DDX1 - dead (asp-glu-ala-asp) box helicase 1, ATXN2 - ataxin 2, DHX30 - deah (asp-glu-ala-his) …
GO:0010608	posttranscriptional regulation of gene expression	5.04e-07	[RPL26 - ribosomal protein l26, DHX9 - deah (asp-glu-ala-his) box helicase 9, PURA - purine-rich element binding protein a, SERBP1 - serpine1 mrna binding protein 1, FMR1 - fragile x mental retardation 1, DDX3X - dead (asp-glu-ala-asp) box helicase 3, x-linked, DDX1 - dead (asp-glu-ala-asp) box helicase 1, NCL - nucleolin, EIF3C - eukaryotic translation initiation factor 3, subunit c, HNRNPM - he…
GO:0048519	negative regulation of biological process	5.89e-07	[DHX9 - deah (asp-glu-ala-his) box helicase 9, FMR1 - fragile x mental retardation 1, DDX6 - dead (asp-glu-ala-asp) box helicase 6, DDX5 - dead (asp-glu-ala-asp) box helicase 5, G3BP1 - gtpase activating protein (sh3 domain) binding protein 1, DDX3X - dead (asp-glu-ala-asp) box helicase 3, x-linked, DTX3L - deltex 3-like (drosophila), RFC1 - replication factor c (activator 1) 1, 145kda, NCL - nuc…
GO:0051641	cellular localization	9.88e-07	[DHX9 - deah (asp-glu-ala-his) box helicase 9, RPL26 - ribosomal protein l26, RPL23A - ribosomal protein l23a, DDX3X - dead (asp-glu-ala-asp) box helicase 3, x-linked, DDX1 - dead (asp-glu-ala-asp) box helicase 1, DTX3L - deltex 3-like (drosophila), RPL18A - ribosomal protein l18a, RPL15 - ribosomal protein l15, RPL13 - ribosomal protein l13, RPL12 - ribosomal protein l12, RPL11 - ribosomal prote…
GO:0006417	regulation of translation	6.74e-06	[DHX9 - deah (asp-glu-ala-his) box helicase 9, RPL26 - ribosomal protein l26, PURA - purine-rich element binding protein a, EEF2 - eukaryotic translation elongation factor 2, FMR1 - fragile x mental retardation 1, DDX3X - dead (asp-glu-ala-asp) box helicase 3, x-linked, FXR2 - fragile x mental retardation, autosomal homolog 2, DDX1 - dead (asp-glu-ala-asp) box helicase 1, NCL - nucleolin, ATXN2 -…
GO:0008104	protein localization	1.27e-05	[DHX9 - deah (asp-glu-ala-his) box helicase 9, RPL26 - ribosomal protein l26, RPL23A - ribosomal protein l23a, DDX3X - dead (asp-glu-ala-asp) box helicase 3, x-linked, DDX1 - dead (asp-glu-ala-asp) box helicase 1, DTX3L - deltex 3-like (drosophila), RPL18A - ribosomal protein l18a, RPL15 - ribosomal protein l15, RPL13 - ribosomal protein l13, RPL12 - ribosomal protein l12, RPL11 - ribosomal prote…
GO:0033036	macromolecule localization	2.09e-05	[DHX9 - deah (asp-glu-ala-his) box helicase 9, RPL26 - ribosomal protein l26, RPL23A - ribosomal protein l23a, DDX3X - dead (asp-glu-ala-asp) box helicase 3, x-linked, DTX3L - deltex 3-like (drosophila), DDX1 - dead (asp-glu-ala-asp) box helicase 1, RPL18A - ribosomal protein l18a, RPL15 - ribosomal protein l15, RPL13 - ribosomal protein l13, RPL12 - ribosomal protein l12, RPL11 - ribosomal prote…
GO:0006396	RNA processing	2.08e-05	[DHX9 - deah (asp-glu-ala-his) box helicase 9, POP1 - processing of precursor 1, ribonuclease p/mrp subunit (s. cerevisiae), DHX8 - deah (asp-glu-ala-his) box polypeptide 8, MTPAP - mitochondrial poly(a) polymerase, IKBKAP - inhibitor of kappa light polypeptide gene enhancer in b-cells, kinase complex-associated protein, FMR1 - fragile x mental retardation 1, NCBP1 - nuclear cap binding protein s…
GO:0034248	regulation of cellular amide metabolic process	4.01e-05	[DHX9 - deah (asp-glu-ala-his) box helicase 9, RPL26 - ribosomal protein l26, PURA - purine-rich element binding protein a, EEF2 - eukaryotic translation elongation factor 2, FMR1 - fragile x mental retardation 1, DDX3X - dead (asp-glu-ala-asp) box helicase 3, x-linked, FXR2 - fragile x mental retardation, autosomal homolog 2, DDX1 - dead (asp-glu-ala-asp) box helicase 1, NCL - nucleolin, ATXN2 -…
GO:0043170	macromolecule metabolic process	5.22e-05	[A2M - alpha-2-macroglobulin, RFC5 - replication factor c (activator 1) 5, 36.5kda, G3BP1 - gtpase activating protein (sh3 domain) binding protein 1, RBM39 - rna binding motif protein 39, RFC1 - replication factor c (activator 1) 1, 145kda, UHRF1 - ubiquitin-like with phd and ring finger domains 1, ABCF1 - atp-binding cassette, sub-family f (gcn20), member 1, HNRNPM - heterogeneous nuclear ribonu…
GO:0006810	transport	6.83e-05	[DHX9 - deah (asp-glu-ala-his) box helicase 9, RPL26 - ribosomal protein l26, FMR1 - fragile x mental retardation 1, RPL23A - ribosomal protein l23a, DDX3X - dead (asp-glu-ala-asp) box helicase 3, x-linked, DTX3L - deltex 3-like (drosophila), RPL18A - ribosomal protein l18a, RPL15 - ribosomal protein l15, RPL13 - ribosomal protein l13, RPL12 - ribosomal protein l12, RPL11 - ribosomal protein l11,…
GO:0044249	cellular biosynthetic process	8.67e-05	[DHX9 - deah (asp-glu-ala-his) box helicase 9, RPL26 - ribosomal protein l26, DDX5 - dead (asp-glu-ala-asp) box helicase 5, RPL23A - ribosomal protein l23a, RPL18A - ribosomal protein l18a, RPL15 - ribosomal protein l15, RPL13 - ribosomal protein l13, RPL12 - ribosomal protein l12, RPL11 - ribosomal protein l11, RPL9 - ribosomal protein l9, ABCF1 - atp-binding cassette, sub-family f (gcn20), memb…
GO:0051234	establishment of localization	0.000104	[DHX9 - deah (asp-glu-ala-his) box helicase 9, RPL26 - ribosomal protein l26, FMR1 - fragile x mental retardation 1, RPL23A - ribosomal protein l23a, DDX3X - dead (asp-glu-ala-asp) box helicase 3, x-linked, DTX3L - deltex 3-like (drosophila), RPL18A - ribosomal protein l18a, RPL15 - ribosomal protein l15, RPL13 - ribosomal protein l13, RPL12 - ribosomal protein l12, RPL11 - ribosomal protein l11,…
GO:1901575	organic substance catabolic process	0.000398	[RPL26 - ribosomal protein l26, DDX6 - dead (asp-glu-ala-asp) box helicase 6, RPL23A - ribosomal protein l23a, DDX5 - dead (asp-glu-ala-asp) box helicase 5, DTX3L - deltex 3-like (drosophila), RPL19 - ribosomal protein l19, RPL18A - ribosomal protein l18a, RPL15 - ribosomal protein l15, MRTO4 - mrna turnover 4 homolog (s. cerevisiae), RPL13 - ribosomal protein l13, ZCCHC6 - zinc finger, cchc doma…
GO:0044248	cellular catabolic process	0.000599	[RPL26 - ribosomal protein l26, DDX6 - dead (asp-glu-ala-asp) box helicase 6, RPL23A - ribosomal protein l23a, DDX5 - dead (asp-glu-ala-asp) box helicase 5, IFI16 - interferon, gamma-inducible protein 16, DTX3L - deltex 3-like (drosophila), RPL19 - ribosomal protein l19, RPL18A - ribosomal protein l18a, RPL15 - ribosomal protein l15, MRTO4 - mrna turnover 4 homolog (s. cerevisiae), RPL13 - riboso…
GO:0034622	cellular protein-containing complex assembly	0.000801	[DHX9 - deah (asp-glu-ala-his) box helicase 9, RPS23 - ribosomal protein s23, RPL24 - ribosomal protein l24, CKAP5 - cytoskeleton associated protein 5, DDX6 - dead (asp-glu-ala-asp) box helicase 6, RPL23A - ribosomal protein l23a, DDX3X - dead (asp-glu-ala-asp) box helicase 3, x-linked, G3BP1 - gtpase activating protein (sh3 domain) binding protein 1, ATXN2L - ataxin 2-like, DDX1 - dead (asp-glu-…
GO:1901576	organic substance biosynthetic process	0.00105	[DHX9 - deah (asp-glu-ala-his) box helicase 9, RPL26 - ribosomal protein l26, DDX5 - dead (asp-glu-ala-asp) box helicase 5, RPL23A - ribosomal protein l23a, RPL18A - ribosomal protein l18a, RPL15 - ribosomal protein l15, RPL13 - ribosomal protein l13, RPL12 - ribosomal protein l12, RPL11 - ribosomal protein l11, RPL9 - ribosomal protein l9, ABCF1 - atp-binding cassette, sub-family f (gcn20), memb…
GO:0009058	biosynthetic process	0.00104	[DHX9 - deah (asp-glu-ala-his) box helicase 9, RPL26 - ribosomal protein l26, DDX5 - dead (asp-glu-ala-asp) box helicase 5, RPL23A - ribosomal protein l23a, RPL18A - ribosomal protein l18a, RPL15 - ribosomal protein l15, RPL13 - ribosomal protein l13, RPL12 - ribosomal protein l12, RPL11 - ribosomal protein l11, RPL9 - ribosomal protein l9, ABCF1 - atp-binding cassette, sub-family f (gcn20), memb…
GO:0050789	regulation of biological process	0.00141	[DHX9 - deah (asp-glu-ala-his) box helicase 9, FMR1 - fragile x mental retardation 1, DDX6 - dead (asp-glu-ala-asp) box helicase 6, DDX5 - dead (asp-glu-ala-asp) box helicase 5, DDX3X - dead (asp-glu-ala-asp) box helicase 3, x-linked, G3BP1 - gtpase activating protein (sh3 domain) binding protein 1, DTX3L - deltex 3-like (drosophila), DDX1 - dead (asp-glu-ala-asp) box helicase 1, ATXN2L - ataxin …
GO:0044260	cellular macromolecule metabolic process	0.00173	[DHX9 - deah (asp-glu-ala-his) box helicase 9, DDX6 - dead (asp-glu-ala-asp) box helicase 6, DDX5 - dead (asp-glu-ala-asp) box helicase 5, DDX1 - dead (asp-glu-ala-asp) box helicase 1, DTX3L - deltex 3-like (drosophila), RFC1 - replication factor c (activator 1) 1, 145kda, ZCCHC6 - zinc finger, cchc domain containing 6, ABCF1 - atp-binding cassette, sub-family f (gcn20), member 1, RECQL - recq pr…
GO:0051607	defense response to virus	0.00184	[OAS3 - 2'-5'-oligoadenylate synthetase 3, 100kda, IFI16 - interferon, gamma-inducible protein 16, G3BP1 - gtpase activating protein (sh3 domain) binding protein 1, DTX3L - deltex 3-like (drosophila), DDX1 - dead (asp-glu-ala-asp) box helicase 1, TRIM56 - tripartite motif containing 56, ZC3HAV1 - zinc finger ccch-type, antiviral 1, ADAR - adenosine deaminase, rna-specific, DDX21 - dead (asp-glu-a…
GO:0009615	response to virus	0.00207	[HNRNPUL1 - heterogeneous nuclear ribonucleoprotein u-like 1, OAS3 - 2'-5'-oligoadenylate synthetase 3, 100kda, FMR1 - fragile x mental retardation 1, DDX3X - dead (asp-glu-ala-asp) box helicase 3, x-linked, G3BP1 - gtpase activating protein (sh3 domain) binding protein 1, IFI16 - interferon, gamma-inducible protein 16, DDX1 - dead (asp-glu-ala-asp) box helicase 1, DTX3L - deltex 3-like (drosophi…
GO:0044267	cellular protein metabolic process	0.0025	[DTX3L - deltex 3-like (drosophila), UHRF1 - ubiquitin-like with phd and ring finger domains 1, FAM98A - family with sequence similarity 98, member a, ABCF1 - atp-binding cassette, sub-family f (gcn20), member 1, GEMIN5 - gem (nuclear organelle) associated protein 5, DERL1 - derlin 1, CKAP4 - cytoskeleton-associated protein 4, TRIM25 - tripartite motif containing 25, ILF3 - interleukin enhancer b…
GO:1903311	regulation of mRNA metabolic process	0.00286	[DHX9 - deah (asp-glu-ala-his) box helicase 9, SERBP1 - serpine1 mrna binding protein 1, PRDX6 - peroxiredoxin 6, PKP3 - plakophilin 3, FMR1 - fragile x mental retardation 1, DDX5 - dead (asp-glu-ala-asp) box helicase 5, FXR2 - fragile x mental retardation, autosomal homolog 2, NCL - nucleolin, PTBP1 - polypyrimidine tract binding protein 1, PABPC1 - poly(a) binding protein, cytoplasmic 1, CTR9 -…
GO:2001022	positive regulation of response to DNA damage stimulus	0.0032	[PARP1 - poly (adp-ribose) polymerase 1, DHX9 - deah (asp-glu-ala-his) box helicase 9, RPL26 - ribosomal protein l26, ERCC6 - excision repair cross-complementing rodent repair deficiency, complementation group 6, FXR1 - fragile x mental retardation, autosomal homolog 1, FMR1 - fragile x mental retardation 1, DDX5 - dead (asp-glu-ala-asp) box helicase 5, RPS3 - ribosomal protein s3, DTX3L - deltex…
GO:0009056	catabolic process	0.00326	[RPL26 - ribosomal protein l26, DDX6 - dead (asp-glu-ala-asp) box helicase 6, RPL23A - ribosomal protein l23a, DDX5 - dead (asp-glu-ala-asp) box helicase 5, IFI16 - interferon, gamma-inducible protein 16, DTX3L - deltex 3-like (drosophila), RPL19 - ribosomal protein l19, RPL18A - ribosomal protein l18a, RPL15 - ribosomal protein l15, MRTO4 - mrna turnover 4 homolog (s. cerevisiae), RPL13 - riboso…
GO:0000027	ribosomal large subunit assembly	0.00372	[RPL10 - ribosomal protein l10, RPL24 - ribosomal protein l24, RPL6 - ribosomal protein l6, RPL23A - ribosomal protein l23a, RPL5 - ribosomal protein l5, RPL3 - ribosomal protein l3, DHX30 - deah (asp-glu-ala-his) box helicase 30, MRTO4 - mrna turnover 4 homolog (s. cerevisiae), RPL12 - ribosomal protein l12, RPLP0 - ribosomal protein, large, p0, RPL11 - ribosomal protein l11]
GO:0010611	regulation of cardiac muscle hypertrophy	0.00412	[PARP1 - poly (adp-ribose) polymerase 1, LMNA - lamin a/c]
GO:0043502	regulation of muscle adaptation	0.00408	[PARP1 - poly (adp-ribose) polymerase 1, LMNA - lamin a/c]
GO:0014743	regulation of muscle hypertrophy	0.00403	[PARP1 - poly (adp-ribose) polymerase 1, LMNA - lamin a/c]
GO:0051179	localization	0.00414	[DHX9 - deah (asp-glu-ala-his) box helicase 9, RPL26 - ribosomal protein l26, FMR1 - fragile x mental retardation 1, RPL23A - ribosomal protein l23a, DDX3X - dead (asp-glu-ala-asp) box helicase 3, x-linked, DDX1 - dead (asp-glu-ala-asp) box helicase 1, DTX3L - deltex 3-like (drosophila), RPL18A - ribosomal protein l18a, RPL15 - ribosomal protein l15, RPL13 - ribosomal protein l13, RPL12 - ribosom…
GO:0034063	stress granule assembly	0.00454	[RPS23 - ribosomal protein s23, DDX6 - dead (asp-glu-ala-asp) box helicase 6, DDX3X - dead (asp-glu-ala-asp) box helicase 3, x-linked, G3BP1 - gtpase activating protein (sh3 domain) binding protein 1, ATXN2L - ataxin 2-like, ATXN2 - ataxin 2, G3BP2 - gtpase activating protein (sh3 domain) binding protein 2]
GO:0017148	negative regulation of translation	0.0053	[PURA - purine-rich element binding protein a, FMR1 - fragile x mental retardation 1, IGF2BP3 - insulin-like growth factor 2 mrna binding protein 3, IGF2BP1 - insulin-like growth factor 2 mrna binding protein 1, DDX3X - dead (asp-glu-ala-asp) box helicase 3, x-linked, RPS3 - ribosomal protein s3, FXR2 - fragile x mental retardation, autosomal homolog 2, RBM4 - rna binding motif protein 4, NCL - n…
GO:0045727	positive regulation of translation	0.00823	[RPS4X - ribosomal protein s4, x-linked, DHX9 - deah (asp-glu-ala-his) box helicase 9, RPL26 - ribosomal protein l26, EEF2 - eukaryotic translation elongation factor 2, FMR1 - fragile x mental retardation 1, NPM1 - nucleophosmin (nucleolar phosphoprotein b23, numatrin), DDX3X - dead (asp-glu-ala-asp) box helicase 3, x-linked, FXR2 - fragile x mental retardation, autosomal homolog 2, VIM - vimenti…
GO:0006807	nitrogen compound metabolic process	0.0089	[A2M - alpha-2-macroglobulin, RFC5 - replication factor c (activator 1) 5, 36.5kda, G3BP1 - gtpase activating protein (sh3 domain) binding protein 1, RBM39 - rna binding motif protein 39, RFC1 - replication factor c (activator 1) 1, 145kda, UHRF1 - ubiquitin-like with phd and ring finger domains 1, ABCF1 - atp-binding cassette, sub-family f (gcn20), member 1, HNRNPM - heterogeneous nuclear ribonu…
GO:0034250	positive regulation of cellular amide metabolic process	0.00903	[RPS4X - ribosomal protein s4, x-linked, RPL26 - ribosomal protein l26, DHX9 - deah (asp-glu-ala-his) box helicase 9, FMR1 - fragile x mental retardation 1, NPM1 - nucleophosmin (nucleolar phosphoprotein b23, numatrin), DDX3X - dead (asp-glu-ala-asp) box helicase 3, x-linked, FXR2 - fragile x mental retardation, autosomal homolog 2, VIM - vimentin, GNB2L1 - guanine nucleotide binding protein (g p…
GO:0034249	negative regulation of cellular amide metabolic process	0.00966	[PURA - purine-rich element binding protein a, FMR1 - fragile x mental retardation 1, IGF2BP3 - insulin-like growth factor 2 mrna binding protein 3, IGF2BP1 - insulin-like growth factor 2 mrna binding protein 1, DDX3X - dead (asp-glu-ala-asp) box helicase 3, x-linked, RPS3 - ribosomal protein s3, FXR2 - fragile x mental retardation, autosomal homolog 2, RBM4 - rna binding motif protein 4, NCL - n…
GO:0006302	double-strand break repair	0.0126	[ERCC6 - excision repair cross-complementing rodent repair deficiency, complementation group 6, HERC2 - hect and rld domain containing e3 ubiquitin protein ligase 2, DDX1 - dead (asp-glu-ala-asp) box helicase 1, DTX3L - deltex 3-like (drosophila), XRCC6 - x-ray repair complementing defective repair in chinese hamster cells 6, PRKDC - protein kinase, dna-activated, catalytic polypeptide, RAD50 - r…
GO:0061013	regulation of mRNA catabolic process	0.0125	[DHX9 - deah (asp-glu-ala-his) box helicase 9, SERBP1 - serpine1 mrna binding protein 1, FMR1 - fragile x mental retardation 1, PKP3 - plakophilin 3, FXR2 - fragile x mental retardation, autosomal homolog 2, PABPC1 - poly(a) binding protein, cytoplasmic 1, FUS - fused in sarcoma, HNRNPU - heterogeneous nuclear ribonucleoprotein u (scaffold attachment factor a), HNRNPM - heterogeneous nuclear ribo…
GO:0002181	cytoplasmic translation	0.0137	[RPL26 - ribosomal protein l26, RPL24 - ribosomal protein l24, RPS23 - ribosomal protein s23, RPSA - ribosomal protein sa, RPL19 - ribosomal protein l19, RPL18A - ribosomal protein l18a, RPLP1 - ribosomal protein, large, p1, RPL15 - ribosomal protein l15, RPLP0 - ribosomal protein, large, p0, RPL11 - ribosomal protein l11, RPL10A - ribosomal protein l10a, RPL9 - ribosomal protein l9, RPL8 - ribos…
GO:0006364	rRNA processing	0.0167	[RPL26 - ribosomal protein l26, RPL35 - ribosomal protein l35, DKC1 - dyskeratosis congenita 1, dyskerin, RPS2 - ribosomal protein s2, RPS17 - ribosomal protein s17, RPS16 - ribosomal protein s16, PA2G4 - proliferation-associated 2g4, 38kda, MRTO4 - mrna turnover 4 homolog (s. cerevisiae), GEMIN4 - gem (nuclear organelle) associated protein 4, RPS19 - ribosomal protein s19, RPL11 - ribosomal prot…
GO:0032268	regulation of cellular protein metabolic process	0.0192	[RPL26 - ribosomal protein l26, DHX9 - deah (asp-glu-ala-his) box helicase 9, PURA - purine-rich element binding protein a, FMR1 - fragile x mental retardation 1, IFI16 - interferon, gamma-inducible protein 16, DDX3X - dead (asp-glu-ala-asp) box helicase 3, x-linked, DTX3L - deltex 3-like (drosophila), DDX1 - dead (asp-glu-ala-asp) box helicase 1, NCL - nucleolin, RPL11 - ribosomal protein l11, E…
GO:0034470	ncRNA processing	0.0206	[RPL26 - ribosomal protein l26, IKBKAP - inhibitor of kappa light polypeptide gene enhancer in b-cells, kinase complex-associated protein, POP1 - processing of precursor 1, ribonuclease p/mrp subunit (s. cerevisiae), DDX1 - dead (asp-glu-ala-asp) box helicase 1, MRTO4 - mrna turnover 4 homolog (s. cerevisiae), TRMT1L - trna methyltransferase 1 homolog (s. cerevisiae)-like, ZCCHC6 - zinc finger, c…
GO:2001020	regulation of response to DNA damage stimulus	0.0229	[DHX9 - deah (asp-glu-ala-his) box helicase 9, RPL26 - ribosomal protein l26, ERCC6 - excision repair cross-complementing rodent repair deficiency, complementation group 6, FMR1 - fragile x mental retardation 1, NPM1 - nucleophosmin (nucleolar phosphoprotein b23, numatrin), DDX5 - dead (asp-glu-ala-asp) box helicase 5, FXR2 - fragile x mental retardation, autosomal homolog 2, RPS3 - ribosomal pro…
GO:0065007	biological regulation	0.0234	[DHX9 - deah (asp-glu-ala-his) box helicase 9, FMR1 - fragile x mental retardation 1, DDX6 - dead (asp-glu-ala-asp) box helicase 6, DDX5 - dead (asp-glu-ala-asp) box helicase 5, DDX3X - dead (asp-glu-ala-asp) box helicase 3, x-linked, G3BP1 - gtpase activating protein (sh3 domain) binding protein 1, DTX3L - deltex 3-like (drosophila), DDX1 - dead (asp-glu-ala-asp) box helicase 1, ATXN2L - ataxin …
GO:0071345	cellular response to cytokine stimulus	0.0252	[HNRNPU - heterogeneous nuclear ribonucleoprotein u (scaffold attachment factor a), DHX9 - deah (asp-glu-ala-his) box helicase 9, USP10 - ubiquitin specific peptidase 10, RPS3 - ribosomal protein s3, RPS2 - ribosomal protein s2, NCL - nucleolin, VIM - vimentin, MYO1C - myosin ic, UPF1 - upf1 regulator of nonsense transcripts homolog (yeast), RPL3 - ribosomal protein l3, RPL13A - ribosomal protein…
GO:0006281	DNA repair	0.0253	[ERCC6 - excision repair cross-complementing rodent repair deficiency, complementation group 6, NONO - non-pou domain containing, octamer-binding, DTX3L - deltex 3-like (drosophila), DDX1 - dead (asp-glu-ala-asp) box helicase 1, RFC1 - replication factor c (activator 1) 1, 145kda, SUPT16H - suppressor of ty 16 homolog (s. cerevisiae), SMC3 - structural maintenance of chromosomes 3, SSRP1 - struct…
GO:0016072	rRNA metabolic process	0.0362	[RPL26 - ribosomal protein l26, RPL35 - ribosomal protein l35, DKC1 - dyskeratosis congenita 1, dyskerin, RPS2 - ribosomal protein s2, RPS17 - ribosomal protein s17, RPS16 - ribosomal protein s16, PA2G4 - proliferation-associated 2g4, 38kda, MRTO4 - mrna turnover 4 homolog (s. cerevisiae), GEMIN4 - gem (nuclear organelle) associated protein 4, RPS19 - ribosomal protein s19, RPL11 - ribosomal prot…
GO:0001732	formation of cytoplasmic translation initiation complex	0.0369	[EIF3C - eukaryotic translation initiation factor 3, subunit c, EIF3D - eukaryotic translation initiation factor 3, subunit d, EIF3A - eukaryotic translation initiation factor 3, subunit a, EIF3B - eukaryotic translation initiation factor 3, subunit b, EIF3K - eukaryotic translation initiation factor 3, subunit k, EIF3L - eukaryotic translation initiation factor 3, subunit l, EIF3M - eukaryotic t…
GO:0010556	regulation of macromolecule biosynthetic process	0.0374	[DHX9 - deah (asp-glu-ala-his) box helicase 9, RFC5 - replication factor c (activator 1) 5, 36.5kda, EIF3K - eukaryotic translation initiation factor 3, subunit k, FMR1 - fragile x mental retardation 1, DDX5 - dead (asp-glu-ala-asp) box helicase 5, DDX3X - dead (asp-glu-ala-asp) box helicase 3, x-linked, CDC5L - cell division cycle 5-like, DTX3L - deltex 3-like (drosophila), DDX1 - dead (asp-glu-…
GO:0010628	positive regulation of gene expression	0.0378	[DHX9 - deah (asp-glu-ala-his) box helicase 9, RPL26 - ribosomal protein l26, FMR1 - fragile x mental retardation 1, DDX5 - dead (asp-glu-ala-asp) box helicase 5, DDX3X - dead (asp-glu-ala-asp) box helicase 3, x-linked, IFI16 - interferon, gamma-inducible protein 16, DTX3L - deltex 3-like (drosophila), NCL - nucleolin, RFC1 - replication factor c (activator 1) 1, 145kda, RPL11 - ribosomal protein…
GO:2000112	regulation of cellular macromolecule biosynthetic process	0.0393	[DHX9 - deah (asp-glu-ala-his) box helicase 9, RFC5 - replication factor c (activator 1) 5, 36.5kda, FMR1 - fragile x mental retardation 1, EIF3K - eukaryotic translation initiation factor 3, subunit k, DDX5 - dead (asp-glu-ala-asp) box helicase 5, DDX3X - dead (asp-glu-ala-asp) box helicase 3, x-linked, DDX1 - dead (asp-glu-ala-asp) box helicase 1, DTX3L - deltex 3-like (drosophila), CDC5L - cel…
GO:0051246	regulation of protein metabolic process	0.0395	[RPL26 - ribosomal protein l26, DHX9 - deah (asp-glu-ala-his) box helicase 9, FMR1 - fragile x mental retardation 1, IFI16 - interferon, gamma-inducible protein 16, DDX3X - dead (asp-glu-ala-asp) box helicase 3, x-linked, DTX3L - deltex 3-like (drosophila), DDX1 - dead (asp-glu-ala-asp) box helicase 1, NCL - nucleolin, RPL11 - ribosomal protein l11, EIF3C - eukaryotic translation initiation facto…
GO:0043487	regulation of RNA stability	0.0396	[DHX9 - deah (asp-glu-ala-his) box helicase 9, SERBP1 - serpine1 mrna binding protein 1, FMR1 - fragile x mental retardation 1, DKC1 - dyskeratosis congenita 1, dyskerin, FXR2 - fragile x mental retardation, autosomal homolog 2, PABPC1 - poly(a) binding protein, cytoplasmic 1, FUS - fused in sarcoma, HNRNPU - heterogeneous nuclear ribonucleoprotein u (scaffold attachment factor a), HNRNPM - heter…
GO:0019538	protein metabolic process	0.0394	[A2M - alpha-2-macroglobulin, DTX3L - deltex 3-like (drosophila), UHRF1 - ubiquitin-like with phd and ring finger domains 1, FAM98A - family with sequence similarity 98, member a, RBMX - rna binding motif protein, x-linked, ABCF1 - atp-binding cassette, sub-family f (gcn20), member 1, PCBP2 - poly(rc) binding protein 2, GEMIN5 - gem (nuclear organelle) associated protein 5, DERL1 - derlin 1, CKAP…
GO:0034644	cellular response to UV	0.0421	[PARP1 - poly (adp-ribose) polymerase 1, RPL26 - ribosomal protein l26, FMR1 - fragile x mental retardation 1, NPM1 - nucleophosmin (nucleolar phosphoprotein b23, numatrin), ATR - ataxia telangiectasia and rad3 related]

## Sheet: GO_cellular components
GO Term	Description	FDR q-value	Genes
GO:1990904	ribonucleoprotein complex	3.66e-16	[DHX9 - deah (asp-glu-ala-his) box helicase 9, FMR1 - fragile x mental retardation 1, DDX5 - dead (asp-glu-ala-asp) box helicase 5, G3BP1 - gtpase activating protein (sh3 domain) binding protein 1, DDX3X - dead (asp-glu-ala-asp) box helicase 3, x-linked, DDX1 - dead (asp-glu-ala-asp) box helicase 1, ATXN2L - ataxin 2-like, NCL - nucleolin, DHX30 - deah (asp-glu-ala-his) box helicase 30, ABCF1 - a…
GO:0044391	ribosomal subunit	4.19e-16	[RPL26 - ribosomal protein l26, RPL24 - ribosomal protein l24, RPL23A - ribosomal protein l23a, DDX3X - dead (asp-glu-ala-asp) box helicase 3, x-linked, RPL21 - ribosomal protein l21, RPL19 - ribosomal protein l19, RPL18A - ribosomal protein l18a, RPL18 - ribosomal protein l18, RPL15 - ribosomal protein l15, RPL13 - ribosomal protein l13, RPL12 - ribosomal protein l12, RPL11 - ribosomal protein l…
GO:0044445	cytosolic part	9.46e-14	[RPL26 - ribosomal protein l26, RPL24 - ribosomal protein l24, RPL23A - ribosomal protein l23a, DDX3X - dead (asp-glu-ala-asp) box helicase 3, x-linked, RPL21 - ribosomal protein l21, RPL19 - ribosomal protein l19, RPL18A - ribosomal protein l18a, RPL18 - ribosomal protein l18, RPL15 - ribosomal protein l15, RPL13 - ribosomal protein l13, RPL12 - ribosomal protein l12, RPL11 - ribosomal protein l…
GO:0043232	intracellular non-membrane-bounded organelle	1.47e-13	[DHX9 - deah (asp-glu-ala-his) box helicase 9, FMR1 - fragile x mental retardation 1, DDX5 - dead (asp-glu-ala-asp) box helicase 5, G3BP1 - gtpase activating protein (sh3 domain) binding protein 1, DDX3X - dead (asp-glu-ala-asp) box helicase 3, x-linked, ATXN2L - ataxin 2-like, DDX1 - dead (asp-glu-ala-asp) box helicase 1, NCL - nucleolin, DHX30 - deah (asp-glu-ala-his) box helicase 30, ABCF1 - a…
GO:0043228	non-membrane-bounded organelle	2.46e-13	[DHX9 - deah (asp-glu-ala-his) box helicase 9, FMR1 - fragile x mental retardation 1, DDX5 - dead (asp-glu-ala-asp) box helicase 5, G3BP1 - gtpase activating protein (sh3 domain) binding protein 1, DDX3X - dead (asp-glu-ala-asp) box helicase 3, x-linked, ATXN2L - ataxin 2-like, DDX1 - dead (asp-glu-ala-asp) box helicase 1, NCL - nucleolin, DHX30 - deah (asp-glu-ala-his) box helicase 30, ABCF1 - a…
GO:0005840	ribosome	6.78e-12	[RPL26 - ribosomal protein l26, DHX9 - deah (asp-glu-ala-his) box helicase 9, RPL24 - ribosomal protein l24, RPS23 - ribosomal protein s23, EEF2 - eukaryotic translation elongation factor 2, FMR1 - fragile x mental retardation 1, RPS27 - ribosomal protein s27, RPS26 - ribosomal protein s26, RPS25 - ribosomal protein s25, RPL19 - ribosomal protein l19, RPS17 - ribosomal protein s17, RPL18A - ribos…
GO:0015934	large ribosomal subunit	1.81e-10	[RPL26 - ribosomal protein l26, RPL24 - ribosomal protein l24, RPL23A - ribosomal protein l23a, FXR2 - fragile x mental retardation, autosomal homolog 2, RPL21 - ribosomal protein l21, RPL19 - ribosomal protein l19, RPL18A - ribosomal protein l18a, RPL14 - ribosomal protein l14, RPL18 - ribosomal protein l18, RPL13A - ribosomal protein l13a, RPL15 - ribosomal protein l15, RPL13 - ribosomal protei…
GO:0022625	cytosolic large ribosomal subunit	3.94e-10	[RPL26 - ribosomal protein l26, RPL24 - ribosomal protein l24, RPL23A - ribosomal protein l23a, FXR2 - fragile x mental retardation, autosomal homolog 2, RPL21 - ribosomal protein l21, RPL19 - ribosomal protein l19, RPL18A - ribosomal protein l18a, RPL18 - ribosomal protein l18, RPL14 - ribosomal protein l14, RPL13A - ribosomal protein l13a, RPL15 - ribosomal protein l15, RPL13 - ribosomal protei…
GO:0032991	protein-containing complex	1.36e-09	[DHX9 - deah (asp-glu-ala-his) box helicase 9, FMR1 - fragile x mental retardation 1, DDX5 - dead (asp-glu-ala-asp) box helicase 5, G3BP1 - gtpase activating protein (sh3 domain) binding protein 1, DDX3X - dead (asp-glu-ala-asp) box helicase 3, x-linked, DTX3L - deltex 3-like (drosophila), ATXN2L - ataxin 2-like, DDX1 - dead (asp-glu-ala-asp) box helicase 1, NCL - nucleolin, DHX30 - deah (asp-glu…
GO:0030055	cell-substrate junction	3.02e-08	[G3BP1 - gtpase activating protein (sh3 domain) binding protein 1, RPS17 - ribosomal protein s17, RPS16 - ribosomal protein s16, RPL13A - ribosomal protein l13a, PABPC1 - poly(a) binding protein, cytoplasmic 1, RPS19 - ribosomal protein s19, RPL12 - ribosomal protein l12, RPS18 - ribosomal protein s18, RPS10 - ribosomal protein s10, RPL9 - ribosomal protein l9, RPS11 - ribosomal protein s11, RPS8…
GO:0005924	cell-substrate adherens junction	2.75e-08	[G3BP1 - gtpase activating protein (sh3 domain) binding protein 1, RPS17 - ribosomal protein s17, RPS16 - ribosomal protein s16, PABPC1 - poly(a) binding protein, cytoplasmic 1, RPL13A - ribosomal protein l13a, RPS19 - ribosomal protein s19, RPL12 - ribosomal protein l12, RPS18 - ribosomal protein s18, RPS10 - ribosomal protein s10, RPL9 - ribosomal protein l9, RPS11 - ribosomal protein s11, RPS8…
GO:0005925	focal adhesion	2.52e-08	[G3BP1 - gtpase activating protein (sh3 domain) binding protein 1, RPS17 - ribosomal protein s17, RPS16 - ribosomal protein s16, RPL13A - ribosomal protein l13a, PABPC1 - poly(a) binding protein, cytoplasmic 1, RPS19 - ribosomal protein s19, RPL12 - ribosomal protein l12, RPS18 - ribosomal protein s18, RPS10 - ribosomal protein s10, RPL9 - ribosomal protein l9, RPS11 - ribosomal protein s11, RPS8…
GO:0005912	adherens junction	4.16e-07	[G3BP1 - gtpase activating protein (sh3 domain) binding protein 1, RPS17 - ribosomal protein s17, RPS16 - ribosomal protein s16, RPL13A - ribosomal protein l13a, PABPC1 - poly(a) binding protein, cytoplasmic 1, RPS19 - ribosomal protein s19, RPL12 - ribosomal protein l12, RPS18 - ribosomal protein s18, RPS10 - ribosomal protein s10, RPL9 - ribosomal protein l9, RPS11 - ribosomal protein s11, RPS8…
GO:0005730	nucleolus	5.32e-07	[RPL26 - ribosomal protein l26, DHX9 - deah (asp-glu-ala-his) box helicase 9, FMR1 - fragile x mental retardation 1, RPL23A - ribosomal protein l23a, DDX5 - dead (asp-glu-ala-asp) box helicase 5, IFI16 - interferon, gamma-inducible protein 16, NCL - nucleolin, MRTO4 - mrna turnover 4 homolog (s. cerevisiae), RPL13 - ribosomal protein l13, RPL12 - ribosomal protein l12, RPL11 - ribosomal protein l…
GO:0070161	anchoring junction	5.75e-07	[G3BP1 - gtpase activating protein (sh3 domain) binding protein 1, RPS17 - ribosomal protein s17, RPS16 - ribosomal protein s16, PABPC1 - poly(a) binding protein, cytoplasmic 1, RPL13A - ribosomal protein l13a, RPS19 - ribosomal protein s19, RPL12 - ribosomal protein l12, RPS18 - ribosomal protein s18, RPS10 - ribosomal protein s10, RPL9 - ribosomal protein l9, RPS11 - ribosomal protein s11, RPS8…
GO:0035770	ribonucleoprotein granule	7.76e-07	[RPS4X - ribosomal protein s4, x-linked, DHX9 - deah (asp-glu-ala-his) box helicase 9, FMR1 - fragile x mental retardation 1, PABPC4 - poly(a) binding protein, cytoplasmic 4 (inducible form), G3BP1 - gtpase activating protein (sh3 domain) binding protein 1, DDX3X - dead (asp-glu-ala-asp) box helicase 3, x-linked, ATXN2L - ataxin 2-like, DDX1 - dead (asp-glu-ala-asp) box helicase 1, NCL - nucleoli…
GO:0036464	cytoplasmic ribonucleoprotein granule	8.91e-07	[RPS4X - ribosomal protein s4, x-linked, DHX9 - deah (asp-glu-ala-his) box helicase 9, FMR1 - fragile x mental retardation 1, PABPC4 - poly(a) binding protein, cytoplasmic 4 (inducible form), G3BP1 - gtpase activating protein (sh3 domain) binding protein 1, DDX3X - dead (asp-glu-ala-asp) box helicase 3, x-linked, ATXN2L - ataxin 2-like, DDX1 - dead (asp-glu-ala-asp) box helicase 1, NCL - nucleoli…
GO:0044428	nuclear part	2.48e-06	[RFC5 - replication factor c (activator 1) 5, 36.5kda, RBM39 - rna binding motif protein 39, NCL - nucleolin, RFC1 - replication factor c (activator 1) 1, 145kda, UHRF1 - ubiquitin-like with phd and ring finger domains 1, ABCF1 - atp-binding cassette, sub-family f (gcn20), member 1, HNRNPM - heterogeneous nuclear ribonucleoprotein m, RECQL - recq protein-like (dna helicase q1-like), UPF1 - upf1 r…
GO:0015935	small ribosomal subunit	1.18e-05	[RPS4X - ribosomal protein s4, x-linked, RPS3A - ribosomal protein s3a, RPSA - ribosomal protein sa, RPS23 - ribosomal protein s23, RPS5 - ribosomal protein s5, NPM1 - nucleophosmin (nucleolar phosphoprotein b23, numatrin), DDX3X - dead (asp-glu-ala-asp) box helicase 3, x-linked, RPS3 - ribosomal protein s3, RPS2 - ribosomal protein s2, GNB2L1 - guanine nucleotide binding protein (g protein), bet…
GO:0005829	cytosol	2.67e-05	[DHX9 - deah (asp-glu-ala-his) box helicase 9, FMR1 - fragile x mental retardation 1, DDX6 - dead (asp-glu-ala-asp) box helicase 6, G3BP1 - gtpase activating protein (sh3 domain) binding protein 1, DDX3X - dead (asp-glu-ala-asp) box helicase 3, x-linked, DTX3L - deltex 3-like (drosophila), ATXN2L - ataxin 2-like, DDX1 - dead (asp-glu-ala-asp) box helicase 1, DHX30 - deah (asp-glu-ala-his) box hel…
GO:0099572	postsynaptic specialization	3.44e-05	[FMR1 - fragile x mental retardation 1, RPS3 - ribosomal protein s3, FXR2 - fragile x mental retardation, autosomal homolog 2, RPL18A - ribosomal protein l18a, RPLP0 - ribosomal protein, large, p0, RPS19 - ribosomal protein s19, RPL12 - ribosomal protein l12, RPS18 - ribosomal protein s18, RPL10A - ribosomal protein l10a, EIF3A - eukaryotic translation initiation factor 3, subunit a, RPL8 - ribos…
GO:0014069	postsynaptic density	3.28e-05	[FMR1 - fragile x mental retardation 1, RPS3 - ribosomal protein s3, FXR2 - fragile x mental retardation, autosomal homolog 2, RPL18A - ribosomal protein l18a, RPLP0 - ribosomal protein, large, p0, RPL12 - ribosomal protein l12, RPS19 - ribosomal protein s19, RPS18 - ribosomal protein s18, RPL10A - ribosomal protein l10a, EIF3A - eukaryotic translation initiation factor 3, subunit a, RPL8 - ribos…
GO:0022627	cytosolic small ribosomal subunit	3.27e-05	[RPS4X - ribosomal protein s4, x-linked, RPSA - ribosomal protein sa, RPS3A - ribosomal protein s3a, RPS23 - ribosomal protein s23, RPS5 - ribosomal protein s5, DDX3X - dead (asp-glu-ala-asp) box helicase 3, x-linked, RPS3 - ribosomal protein s3, RPS2 - ribosomal protein s2, GNB2L1 - guanine nucleotide binding protein (g protein), beta polypeptide 2-like 1, RPS17 - ribosomal protein s17, RPS16 - …
GO:0030054	cell junction	3.14e-05	[PUF60 - poly-u binding splicing factor 60kda, FMR1 - fragile x mental retardation 1, G3BP1 - gtpase activating protein (sh3 domain) binding protein 1, RPS17 - ribosomal protein s17, RPS16 - ribosomal protein s16, RPL13A - ribosomal protein l13a, PABPC1 - poly(a) binding protein, cytoplasmic 1, RPS19 - ribosomal protein s19, RPL12 - ribosomal protein l12, RPS18 - ribosomal protein s18, RPS10 - ri…
GO:0042788	polysomal ribosome	0.000285	[DHX9 - deah (asp-glu-ala-his) box helicase 9, RPL24 - ribosomal protein l24, RPS23 - ribosomal protein s23, EEF2 - eukaryotic translation elongation factor 2, FMR1 - fragile x mental retardation 1, RPS26 - ribosomal protein s26, RPL19 - ribosomal protein l19, RPL18A - ribosomal protein l18a, RPL18 - ribosomal protein l18, RPL11 - ribosomal protein l11, RPL10A - ribosomal protein l10a, RPL38 - ri…
GO:0010494	cytoplasmic stress granule	0.000907	[FMR1 - fragile x mental retardation 1, DDX6 - dead (asp-glu-ala-asp) box helicase 6, IGF2BP1 - insulin-like growth factor 2 mrna binding protein 1, DDX3X - dead (asp-glu-ala-asp) box helicase 3, x-linked, G3BP1 - gtpase activating protein (sh3 domain) binding protein 1, PABPC4 - poly(a) binding protein, cytoplasmic 4 (inducible form), DDX1 - dead (asp-glu-ala-asp) box helicase 1, ATXN2L - ataxin…
GO:0005654	nucleoplasm	0.00292	[DHX9 - deah (asp-glu-ala-his) box helicase 9, RFC5 - replication factor c (activator 1) 5, 36.5kda, FMR1 - fragile x mental retardation 1, DDX5 - dead (asp-glu-ala-asp) box helicase 5, DDX3X - dead (asp-glu-ala-asp) box helicase 3, x-linked, CDC5L - cell division cycle 5-like, RBM39 - rna binding motif protein 39, DTX3L - deltex 3-like (drosophila), DDX1 - dead (asp-glu-ala-asp) box helicase 1, …
GO:0016020	membrane	0.0101	[DHX9 - deah (asp-glu-ala-his) box helicase 9, FMR1 - fragile x mental retardation 1, DDX5 - dead (asp-glu-ala-asp) box helicase 5, DDX3X - dead (asp-glu-ala-asp) box helicase 3, x-linked, ATXN2L - ataxin 2-like, DDX1 - dead (asp-glu-ala-asp) box helicase 1, DTX3L - deltex 3-like (drosophila), NCL - nucleolin, ABCF1 - atp-binding cassette, sub-family f (gcn20), member 1, HNRNPM - heterogeneous nu…
GO:0005852	eukaryotic translation initiation factor 3 complex	0.0111	[EIF3K - eukaryotic translation initiation factor 3, subunit k, EIF3M - eukaryotic translation initiation factor 3, subunit m, DDX3X - dead (asp-glu-ala-asp) box helicase 3, x-linked, EIF3C - eukaryotic translation initiation factor 3, subunit c, EIF3D - eukaryotic translation initiation factor 3, subunit d, EIF3A - eukaryotic translation initiation factor 3, subunit a, EIF3B - eukaryotic transla…
GO:0005844	polysome	0.0117	[RPS4X - ribosomal protein s4, x-linked, DHX9 - deah (asp-glu-ala-his) box helicase 9, FXR1 - fragile x mental retardation, autosomal homolog 1, FMR1 - fragile x mental retardation 1, RPL7 - ribosomal protein l7, RPS3 - ribosomal protein s3, FXR2 - fragile x mental retardation, autosomal homolog 2, LARP1 - la ribonucleoprotein domain family, member 1, VIM - vimentin, ATXN2 - ataxin 2, AGO2 - argo…
GO:0098687	chromosomal region	0.0129	[SMC1A - structural maintenance of chromosomes 1a, PURA - purine-rich element binding protein a, FMR1 - fragile x mental retardation 1, HNRNPA2B1 - heterogeneous nuclear ribonucleoprotein a2/b1, NCAPD3 - non-smc condensin ii complex, subunit d3, XRCC6 - x-ray repair complementing defective repair in chinese hamster cells 6, HIST2H4B - histone cluster 2, h4b, NCAPD2 - non-smc condensin i complex, …
GO:0033290	eukaryotic 48S preinitiation complex	0.0198	[EIF3C - eukaryotic translation initiation factor 3, subunit c, EIF3D - eukaryotic translation initiation factor 3, subunit d, EIF3A - eukaryotic translation initiation factor 3, subunit a, EIF3B - eukaryotic translation initiation factor 3, subunit b, EIF3K - eukaryotic translation initiation factor 3, subunit k, EIF3L - eukaryotic translation initiation factor 3, subunit l, EIF3M - eukaryotic t…
GO:0005634	nucleus	0.0233	[PRDX6 - peroxiredoxin 6, NCBP1 - nuclear cap binding protein subunit 1, 80kda, DNAJA1 - dnaj (hsp40) homolog, subfamily a, member 1, RFC5 - replication factor c (activator 1) 5, 36.5kda, RFC2 - replication factor c (activator 1) 2, 40kda, G3BP1 - gtpase activating protein (sh3 domain) binding protein 1, RFC3 - replication factor c (activator 1) 3, 38kda, SERPINA3 - serpin peptidase inhibitor, cl…

## Sheet: GO_cellular function
GO Term	Description	FDR q-value	Genes
GO:0003676	nucleic acid binding	5.33e-24	[RFC5 - replication factor c (activator 1) 5, 36.5kda, G3BP1 - gtpase activating protein (sh3 domain) binding protein 1, RBM39 - rna binding motif protein 39, RFC1 - replication factor c (activator 1) 1, 145kda, NCL - nucleolin, DHX30 - deah (asp-glu-ala-his) box helicase 30, UHRF1 - ubiquitin-like with phd and ring finger domains 1, ABCF1 - atp-binding cassette, sub-family f (gcn20), member 1, H…
GO:0003723	RNA binding	6.08e-24	[G3BP1 - gtpase activating protein (sh3 domain) binding protein 1, RBM39 - rna binding motif protein 39, NCL - nucleolin, DHX30 - deah (asp-glu-ala-his) box helicase 30, ABCF1 - atp-binding cassette, sub-family f (gcn20), member 1, HNRNPM - heterogeneous nuclear ribonucleoprotein m, NSUN2 - nop2/sun rna methyltransferase family, member 2, UPF1 - upf1 regulator of nonsense transcripts homolog (yea…
GO:0003735	structural constituent of ribosome	7.34e-15	[RPL26 - ribosomal protein l26, RPL24 - ribosomal protein l24, RPL23A - ribosomal protein l23a, RPL21 - ribosomal protein l21, RPL19 - ribosomal protein l19, RPL18A - ribosomal protein l18a, RPL18 - ribosomal protein l18, RPL15 - ribosomal protein l15, RPL13 - ribosomal protein l13, RPL12 - ribosomal protein l12, RPL11 - ribosomal protein l11, RPL9 - ribosomal protein l9, RPL10 - ribosomal protei…
GO:1901363	heterocyclic compound binding	1.52e-14	[RFC5 - replication factor c (activator 1) 5, 36.5kda, G3BP1 - gtpase activating protein (sh3 domain) binding protein 1, RBM39 - rna binding motif protein 39, RFC1 - replication factor c (activator 1) 1, 145kda, NCL - nucleolin, DHX30 - deah (asp-glu-ala-his) box helicase 30, UHRF1 - ubiquitin-like with phd and ring finger domains 1, ABCF1 - atp-binding cassette, sub-family f (gcn20), member 1, H…
GO:0097159	organic cyclic compound binding	3.65e-14	[RFC5 - replication factor c (activator 1) 5, 36.5kda, G3BP1 - gtpase activating protein (sh3 domain) binding protein 1, RBM39 - rna binding motif protein 39, RFC1 - replication factor c (activator 1) 1, 145kda, NCL - nucleolin, DHX30 - deah (asp-glu-ala-his) box helicase 30, UHRF1 - ubiquitin-like with phd and ring finger domains 1, ABCF1 - atp-binding cassette, sub-family f (gcn20), member 1, H…
GO:0005198	structural molecule activity	7.24e-09	[RPL26 - ribosomal protein l26, RPL24 - ribosomal protein l24, RPL23A - ribosomal protein l23a, RPL21 - ribosomal protein l21, RPL19 - ribosomal protein l19, RPL18A - ribosomal protein l18a, RPL18 - ribosomal protein l18, RPL15 - ribosomal protein l15, RPL13 - ribosomal protein l13, RPL12 - ribosomal protein l12, RPL11 - ribosomal protein l11, RPL9 - ribosomal protein l9, RPL10 - ribosomal protei…
GO:0003729	mRNA binding	1.73e-07	[RPL26 - ribosomal protein l26, DHX9 - deah (asp-glu-ala-his) box helicase 9, SERBP1 - serpine1 mrna binding protein 1, FMR1 - fragile x mental retardation 1, DDX5 - dead (asp-glu-ala-asp) box helicase 5, G3BP1 - gtpase activating protein (sh3 domain) binding protein 1, DDX3X - dead (asp-glu-ala-asp) box helicase 3, x-linked, FXR2 - fragile x mental retardation, autosomal homolog 2, NCL - nucleol…
GO:0019843	rRNA binding	2.1e-06	[RPS4X - ribosomal protein s4, x-linked, RPS5 - ribosomal protein s5, EEF2 - eukaryotic translation elongation factor 2, RPL23A - ribosomal protein l23a, NPM1 - nucleophosmin (nucleolar phosphoprotein b23, numatrin), RPS3 - ribosomal protein s3, RPLP0 - ribosomal protein, large, p0, RPL12 - ribosomal protein l12, RPS18 - ribosomal protein s18, RPL11 - ribosomal protein l11, RPL9 - ribosomal prote…
GO:0003730	mRNA 3'-UTR binding	2.4e-05	[SERBP1 - serpine1 mrna binding protein 1, FMR1 - fragile x mental retardation 1, DDX5 - dead (asp-glu-ala-asp) box helicase 5, FXR2 - fragile x mental retardation, autosomal homolog 2, HNRNPA0 - heterogeneous nuclear ribonucleoprotein a0, PABPC1 - poly(a) binding protein, cytoplasmic 1, FUS - fused in sarcoma, HNRNPU - heterogeneous nuclear ribonucleoprotein u (scaffold attachment factor a), FXR…
GO:0048027	mRNA 5'-UTR binding	7.11e-05	[RPL26 - ribosomal protein l26, RPS3A - ribosomal protein s3a, FMR1 - fragile x mental retardation 1, IGF2BP3 - insulin-like growth factor 2 mrna binding protein 3, IGF2BP1 - insulin-like growth factor 2 mrna binding protein 1, DDX3X - dead (asp-glu-ala-asp) box helicase 3, x-linked, NCL - nucleolin, RPS14 - ribosomal protein s14, RSL1D1 - ribosomal l1 domain containing 1, RPL5 - ribosomal protei…
GO:0070717	poly-purine tract binding	0.0308	[HNRNPU - heterogeneous nuclear ribonucleoprotein u (scaffold attachment factor a), FMR1 - fragile x mental retardation 1, PABPC4 - poly(a) binding protein, cytoplasmic 4 (inducible form), DDX3X - dead (asp-glu-ala-asp) box helicase 3, x-linked, DDX1 - dead (asp-glu-ala-asp) box helicase 1, PABPC1 - poly(a) binding protein, cytoplasmic 1, LARP4 - la ribonucleoprotein domain family, member 4]
GO:0008143	poly(A) binding	0.0724	[HNRNPU - heterogeneous nuclear ribonucleoprotein u (scaffold attachment factor a), DDX3X - dead (asp-glu-ala-asp) box helicase 3, x-linked, PABPC4 - poly(a) binding protein, cytoplasmic 4 (inducible form), DDX1 - dead (asp-glu-ala-asp) box helicase 1, PABPC1 - poly(a) binding protein, cytoplasmic 1, LARP4 - la ribonucleoprotein domain family, member 4]
GO:0003727	single-stranded RNA binding	0.0677	[DHX9 - deah (asp-glu-ala-his) box helicase 9, FMR1 - fragile x mental retardation 1, DDX3X - dead (asp-glu-ala-asp) box helicase 3, x-linked, PABPC4 - poly(a) binding protein, cytoplasmic 4 (inducible form), DDX1 - dead (asp-glu-ala-asp) box helicase 1, U2AF2 - u2 small nuclear rna auxiliary factor 2, HNRNPA1 - heterogeneous nuclear ribonucleoprotein a1, PTBP1 - polypyrimidine tract binding prot…
GO:0003725	double-stranded RNA binding	0.0824	[DHX9 - deah (asp-glu-ala-his) box helicase 9, MTDH - metadherin, EIF4A1 - eukaryotic translation initiation factor 4a1, OAS3 - 2'-5'-oligoadenylate synthetase 3, 100kda, FMR1 - fragile x mental retardation 1, DDX3X - dead (asp-glu-ala-asp) box helicase 3, x-linked, DDX1 - dead (asp-glu-ala-asp) box helicase 1, VIM - vimentin, AGO2 - argonaute risc catalytic component 2, DHX30 - deah (asp-glu-ala…
GO:0033677	DNA/RNA helicase activity	0.0773	[DHX9 - deah (asp-glu-ala-his) box helicase 9, DDX1 - dead (asp-glu-ala-asp) box helicase 1]
