# Supplementary material for: One-shot analysis of translated mammalian lncRNAs with AHARIBO
Source: eLife. 2021 Feb 17;10:e59303. doi: 10.7554/eLife.59303 (PMC7932693; doi:10.7554/eLife.59303)
Supplement: Figure 2—source data 1. [file elife-59303-fig2-data1.xlsx]

## Sheet: pSILAC 
Accession	Description	MW [kDa]	light mESC1	light mESC2	light mESC3	light early neuron1	light early neuron2	light early neuron3	heavy mESC1	heavy mESC2	heavy mESC3	heavy early neuron1	heavy early neuron2	heavy early neuron3
Q61550	Double-strand-break repair protein rad21 homolog OS=Mus musculus OX=10090 GN=Rad21 PE=1 SV=3	72	4.7843e+06	2.93426e+06	2.09246e+06				845362	296815	575218	165374	95362.5	416185
O08791	Transcription factor COE3 OS=Mus musculus OX=10090 GN=Ebf3 PE=1 SV=1	64.8									180010	2.60961e+06	1.55681e+06	992886
Q9CR46	Spindle and kinetochore-associated protein 2 OS=Mus musculus OX=10090 GN=Ska2 PE=1 SV=1	13.7	462360	299508	343947				1.4257e+06	1.04159e+06	1.13526e+06	1.2715e+06	902079	1.27039e+06
Q3TYD6	Serine/threonine-protein kinase LMTK2 OS=Mus musculus OX=10090 GN=Lmtk2 PE=1 SV=3	160.4	437576	660765	512905
Q9Z108	Double-stranded RNA-binding protein Staufen homolog 1 OS=Mus musculus OX=10090 GN=Stau1 PE=1 SV=1	53.9	2586244	2.00097e+06	2.2728e+06				1.47277e+06	2.26392e+06	2.10626e+06	328449	140223	545550
Q01149	Collagen alpha-2(I) chain OS=Mus musculus OX=10090 GN=Col1a2 PE=1 SV=2	129.5	763997	594402	822748	438613								120996
Q9D7X3	Dual specificity protein phosphatase 3 OS=Mus musculus OX=10090 GN=Dusp3 PE=1 SV=1	20.5							308788	358913		5.87019e+06	3.80745e+06	2.34906e+06
Q9QXL2	Kinesin-like protein KIF21A OS=Mus musculus OX=10090 GN=Kif21a PE=1 SV=2	186.4	1.14355e+06	1.39797e+06	365249	6.22426e+06	8.45371e+06	6.26293e+06		18324.5	13915.8	2.59301e+06	2.86168e+06	3.01069e+06
Q8K368	Fanconi anemia group I protein homolog OS=Mus musculus OX=10090 GN=Fanci PE=1 SV=2	149.2	847911	836253	759525				7.69021e+06	7.59287e+06	5.95827e+06	3.20198e+06	2.16448e+06	2.21443e+06
Q9QYB2	Dachshund homolog 1 OS=Mus musculus OX=10090 GN=Dach1 PE=1 SV=1	77.9										309630	569794	679967
P40338	von Hippel-Lindau disease tumor suppressor OS=Mus musculus OX=10090 GN=Vhl PE=1 SV=1	20.8	826291	931968	1.17846e+06			63332.6	2.3199e+06	2.22728e+06	2.1201e+06	999350	1.02812e+06	1.16007e+06
P35802	Neuronal membrane glycoprotein M6-a OS=Mus musculus OX=10090 GN=Gpm6a PE=1 SV=1	31.1	975568	1.15098e+06	1.27465e+06	5.96405e+06	5.29621e+06	4.81828e+06	41802.1			3.11897e+06	1.0497e+06	2.76103e+06
B0V2N1	Receptor-type tyrosine-protein phosphatase S OS=Mus musculus OX=10090 GN=Ptprs PE=1 SV=1	211.8								208839		1.66762e+06	1.01739e+06	740950
Q8CGA4	Maturin OS=Mus musculus OX=10090 GN=Mturn PE=1 SV=1	14.8										710569	665704	281189
P08775	DNA-directed RNA polymerase II subunit RPB1 OS=Mus musculus OX=10090 GN=Polr2a PE=1 SV=3	217	1.39122e+06	1.26355e+06	767852	309667		312024	8.05339e+06	1.02201e+07	1.0571e+07	1.53137e+06	5.18547e+07	4.37844e+07
Q3UQ28	Peroxidasin homolog OS=Mus musculus OX=10090 GN=Pxdn PE=1 SV=2	165										216981	649851	531554
Q69Z98	Serine/threonine-protein kinase BRSK2 OS=Mus musculus OX=10090 GN=Brsk2 PE=1 SV=2	81.7	356013	1.1511e+06	400551	1.42579e+06	399290	652682				755439	590191	126956
O55042	Alpha-synuclein OS=Mus musculus OX=10090 GN=Snca PE=1 SV=2	14.5	8.58494e+06	3.01647e+06	1.38467e+07	3.4008e+06	3.49945e+06	1.78238e+06	684351	214319	658013	4.38777e+06	2.10142e+06	2.01462e+06
Q61474	RNA-binding protein Musashi homolog 1 OS=Mus musculus OX=10090 GN=Msi1 PE=1 SV=1	39.1	748451	686236	711005	1.00339e+07	1.33814e+07	1.09131e+07			58334.7	6000755	6.48216e+06	8.12548e+06
P43135	COUP transcription factor 2 OS=Mus musculus OX=10090 GN=Nr2f2 PE=1 SV=2	45.5								297184		641980	1.27875e+06	1.34075e+06
Q8BNV1	tRNA (uracil-5-)-methyltransferase homolog A OS=Mus musculus OX=10090 GN=Trmt2a PE=1 SV=1	63.3	21280896	25231446					2.84535e+06	3.48883e+06	4.22535e+06	978783	863760	77713.8
P70207	Plexin-A2 OS=Mus musculus OX=10090 GN=Plxna2 PE=1 SV=2	211.4		2.24216e+06		429123		212508				963764	461393	273968
Q8CHG3	GRIP and coiled-coil domain-containing protein 2 OS=Mus musculus OX=10090 GN=Gcc2 PE=1 SV=2	194.3	793201	866097	683114				102302	132061	217062	36831.7		66900.8
O35393	Ephrin-B3 OS=Mus musculus OX=10090 GN=Efnb3 PE=1 SV=1	35.9	230161	260590	182400	1.42355e+06	557398	721565				1.64923e+06	1.26373e+06	353255
Q7TSJ2	Microtubule-associated protein 6 OS=Mus musculus OX=10090 GN=Map6 PE=1 SV=2	96.4	319722	550247	308873	1.68946e+06	2.03909e+06	1.60791e+06			69443.9	2.12298e+06	2.06793e+06	1.20889e+06
Q9DB32	Hydroxyacylglutathione hydrolase-like protein OS=Mus musculus OX=10090 GN=Haghl PE=1 SV=1	31.5	177957	287758	206182	201266	158425	102089				161320	85610.6	223692
Q9D7I8	Protein FAM83D OS=Mus musculus OX=10090 GN=Fam83d PE=2 SV=1	64.3	706986	790159	678054	506124
P28741	Kinesin-like protein KIF3A OS=Mus musculus OX=10090 GN=Kif3a PE=1 SV=2	80.1	132475	156174	333574			249179		70448.5				1.07526e+06
Q58A65	C-Jun-amino-terminal kinase-interacting protein 4 OS=Mus musculus OX=10090 GN=Spag9 PE=1 SV=2	146.1	1.63585e+06	1.0888e+06	1.71336e+06	879608	947861	1.10188e+06		222159	253824	727770	733884	677014
Q8R464	Cell adhesion molecule 4 OS=Mus musculus OX=10090 GN=Cadm4 PE=1 SV=1	42.7										506401	346296	141704
Q6R891	Neurabin-2 OS=Mus musculus OX=10090 GN=Ppp1r9b PE=1 SV=1	89.5	504389	801150	104567	2.38489e+06	584841	723161		48962.5		893625	477671	755654
Q9D2V5	Protein AAR2 homolog OS=Mus musculus OX=10090 GN=Aar2 PE=1 SV=3	43.4							116693	196649	2.19353e+06	6451500	4.89795e+06	5.1883e+06
Q03517	Secretogranin-2 OS=Mus musculus OX=10090 GN=Scg2 PE=1 SV=1	70.6										576688	246512	139716
Q922J9	Fatty acyl-CoA reductase 1 OS=Mus musculus OX=10090 GN=Far1 PE=1 SV=1	59.4	1.76769e+06	2.13771e+06	746277				1.78595e+06	2.42104e+06	1.86334e+06	192016	224190	142762
Q6DID7	Protein wntless homolog OS=Mus musculus OX=10090 GN=Wls PE=1 SV=1	62.1	212748	218143		274761	986458	720540		96839.8		1.49984e+06	2.39552e+06	3.39286e+06
Q8R3F5	Malonyl-CoA-acyl carrier protein transacylase, mitochondrial OS=Mus musculus OX=10090 GN=Mcat PE=1 SV=3	41.9	457399	337878	488422				719076	712562	649696	173813	213408	208510
P97783	Protein AF1q OS=Mus musculus OX=10090 GN=Mllt11 PE=1 SV=1	10							1.81249e+06	1.58169e+06		2.28795e+06	2009384	24267992
Q99104	Unconventional myosin-Va OS=Mus musculus OX=10090 GN=Myo5a PE=1 SV=2	215.4	1.02821e+06	1.01146e+06	1.22034e+06	1.85382e+07	8.21308e+06	7.77897e+06	353088	697669	430120	1.0542e+08	3.55497e+06	1.58786e+08
Q61464	Zinc finger protein 638 OS=Mus musculus OX=10090 GN=Znf638 PE=1 SV=2	218	207806	296584	279004			56135.6	2.74359e+06	2.69387e+06	70660.6	448256	820347	631049
Q64449	C-type mannose receptor 2 OS=Mus musculus OX=10090 GN=Mrc2 PE=1 SV=3	167	275169	136915	337210	1.25822e+06	1.65679e+06	815799				636787	608206	1.58012e+06
P12023	Amyloid-beta A4 protein OS=Mus musculus OX=10090 GN=App PE=1 SV=3	86.7				126428	144411	115900				3.10283e+06	1.43867e+06	1.63044e+06
O88935	Synapsin-1 OS=Mus musculus OX=10090 GN=Syn1 PE=1 SV=2	74.1		259928	250610	4.05042e+06	801893	369023		7651.51	114969	5.73676e+06	1.52009e+06	1.5186e+06
Q6PIE5	Sodium/potassium-transporting ATPase subunit alpha-2 OS=Mus musculus OX=10090 GN=Atp1a2 PE=1 SV=1	112.1										362827	145323	164556
Q1EHW4	Histone deacetylase complex subunit SAP25 OS=Mus musculus OX=10090 GN=Sap25 PE=1 SV=1	19.8	1.32414e+06	596409	412842				665964	314103	794208	457982		103817
Q5SQY2	Biorientation of chromosomes in cell division protein 1 OS=Mus musculus OX=10090 GN=Bod1 PE=3 SV=1	18.4										154721	246081	189129
Q5BU09	E2F-associated phosphoprotein OS=Mus musculus OX=10090 GN=Eapp PE=1 SV=2	32.5	4943274	4.18718e+06	6922012	246025	805720	602043
Q91YK2	Ribosomal RNA processing protein 1 homolog B OS=Mus musculus OX=10090 GN=Rrp1b PE=1 SV=2	80.5	523737	528037	715842				433512	634982	752313	72866.2	218834	79964.1
P47867	Secretogranin-3 OS=Mus musculus OX=10090 GN=Scg3 PE=1 SV=1	53.3										351075	82903.4	295830
Q9Z0H4	CUGBP Elav-like family member 2 OS=Mus musculus OX=10090 GN=Celf2 PE=1 SV=1	54.2	113313	8.97917e+06	124679	2.7127e+06	2.69836e+06	3.51474e+06	91825.3	49625.4		1.61282e+06	2.27454e+06	1.36142e+06
P13020	Gelsolin OS=Mus musculus OX=10090 GN=Gsn PE=1 SV=3	85.9	712504	184534	535091	3.66962e+06	3.93267e+06	4.87447e+06				914322	1.27254e+06	1.73262e+06
Q03157	Amyloid-like protein 1 OS=Mus musculus OX=10090 GN=Aplp1 PE=1 SV=1	72.7										472054	46670.3	306506
Q9JJG0	Transforming acidic coiled-coil-containing protein 2 OS=Mus musculus OX=10090 GN=Tacc2 PE=1 SV=2	124.1	542613	518099	731448				553014	781477	590044	137311	50742	165886
Q8K0U4	Heat shock 70 kDa protein 12A OS=Mus musculus OX=10090 GN=Hspa12a PE=1 SV=1	74.8	5.12025e+06	4.78587e+06	6.60904e+06	1.87605e+07	1.01746e+07	8.93194e+06	381098	353114	289135	9.21626e+06	3.48404e+06	3.30178e+06
Q64669	NAD(P)H dehydrogenase [quinone] 1 OS=Mus musculus OX=10090 GN=Nqo1 PE=1 SV=3	30.9	1.76906e+06	1.34535e+06	1.84201e+06	557365		444217	7.20764e+06	5.60516e+06	5.65178e+06	3.48061e+06	3.64958e+06	3.21153e+06
Q08189	Protein-glutamine gamma-glutamyltransferase E OS=Mus musculus OX=10090 GN=Tgm3 PE=1 SV=2	77.3	449586	557733
Q8R123	FAD synthase OS=Mus musculus OX=10090 GN=Flad1 PE=1 SV=1	54.7	501974	700619	674589	37213.9		70926.3	123585	266085	114445	95172.6	123163
Q8BKT7	THO complex subunit 5 homolog OS=Mus musculus OX=10090 GN=Thoc5 PE=1 SV=2	78.6	351426	258520	261988	89488	74082.3	71191.6	237335	87358.2	84283.4	167137	295266	140349
Q04519	Sphingomyelin phosphodiesterase OS=Mus musculus OX=10090 GN=Smpd1 PE=1 SV=2	69.9		339583	223651	218441						593284
Q9D824	Pre-mRNA 3'-end-processing factor FIP1 OS=Mus musculus OX=10090 GN=Fip1l1 PE=1 SV=1	64.9	188469	190007	190673			102659	1.28144e+06	1.31467e+06	379088	1.48599e+06	962402	235410
P31324	cAMP-dependent protein kinase type II-beta regulatory subunit OS=Mus musculus OX=10090 GN=Prkar2b PE=1 SV=3	46.1	721617	617996	827292	1.92447e+07	9.74029e+06	8.97123e+06			268733	7.83351e+06	3.33239e+06	3.40033e+06
Q60954	Homeobox protein Meis1 OS=Mus musculus OX=10090 GN=Meis1 PE=1 SV=1	43		235824	196750	101471	153099	1.19067e+06		202667	280766	1.92716e+06	2.04428e+06	1.53591e+06
Q8BK72	28S ribosomal protein S27, mitochondrial OS=Mus musculus OX=10090 GN=Mrps27 PE=1 SV=2	47.7	321810	341102	111682				1.86368e+06	2.08741e+06	2.74805e+06	817499	342150	1.4089e+06
P09535	Insulin-like growth factor II OS=Mus musculus OX=10090 GN=Igf2 PE=1 SV=1	20	87438.5	75388.6	83490	203567	339961	268462				268205	206787	583020
Q71FD7	Filamin-binding LIM protein 1 OS=Mus musculus OX=10090 GN=Fblim1 PE=1 SV=2	41	1.68631e+06	1.1238e+06	1.67913e+06	665919		333428	1.50735e+07	1.36084e+07	1.32103e+07	9.84777e+06	6.0969e+06	5.75552e+06
Q99J47	Dehydrogenase/reductase SDR family member 7B OS=Mus musculus OX=10090 GN=Dhrs7b PE=1 SV=1	35	226575	322631	190821				1.46659e+06	1.41481e+06	853893	1.14939e+06	1.10112e+06	33699
Q922R5	Serine/threonine-protein phosphatase 4 regulatory subunit 3B OS=Mus musculus OX=10090 GN=Ppp4r3b PE=1 SV=2	93.9	1.44913e+06		201521				490453	461842	372533	162682	257961	290545
O88708	Origin recognition complex subunit 4 OS=Mus musculus OX=10090 GN=Orc4 PE=1 SV=2	50								308310		574920	478746	144897
Q3UM29	Conserved oligomeric Golgi complex subunit 7 OS=Mus musculus OX=10090 GN=Cog7 PE=1 SV=1	86	233691	987971	355024		259941	176562	1.257e+06	367482	1.33795e+06	1.34011e+06	650727	752540
Q921X6	DNA-directed RNA polymerase III subunit RPC6 OS=Mus musculus OX=10090 GN=Polr3f PE=1 SV=1	35.6	223929	255590	463086						377291
Q8CJ53	Cdc42-interacting protein 4 OS=Mus musculus OX=10090 GN=Trip10 PE=1 SV=2	68.4	516274	419055	488811	238945	382785	104736	9.74073e+06	1.19594e+07	10682064	22354453	1.85409e+07	2.68088e+07
P05532	Mast/stem cell growth factor receptor Kit OS=Mus musculus OX=10090 GN=Kit PE=1 SV=3	109.3							196007			237280	416364	232955
P17156	Heat shock-related 70 kDa protein 2 OS=Mus musculus OX=10090 GN=Hspa2 PE=1 SV=2	69.6	348928	166321	525080		1.11771e+06	318389	5.90377e+06	4.79422e+06	1.02043e+06	1.15038e+07	1.60964e+07	2.72544e+06
Q99KC8	von Willebrand factor A domain-containing protein 5A OS=Mus musculus OX=10090 GN=Vwa5a PE=1 SV=2	87.1	1.76685e+06	2.28243e+06	2.379e+06	1.75693e+06	2.14885e+06	2.95166e+06	521384	159934	575614	1.31125e+06	2.10829e+06	1.88438e+06
Q91YN0	Protein C12orf4 homolog OS=Mus musculus OX=10090 GN=D6Wsu163e PE=1 SV=1	63.6									559309	3.84978e+06		1.95042e+06
Q3TJD7	PDZ and LIM domain protein 7 OS=Mus musculus OX=10090 GN=Pdlim7 PE=1 SV=1	50.1	4102651	4.80508e+06	5.54438e+06	1.73706e+06	930742	920231	896806	1.41397e+06	793134	1.49068e+06	871856	944290
Q8CAA7	Glucose 1,6-bisphosphate synthase OS=Mus musculus OX=10090 GN=Pgm2l1 PE=1 SV=1	70.2	353164	1.46437e+06	486790	7.382e+06	4.49884e+06	4.3973e+06	190538	91900.2		3.4094e+06	3.09391e+06	1.54518e+06
Q99K46	Ubiquitin carboxyl-terminal hydrolase 11 OS=Mus musculus OX=10090 GN=Usp11 PE=1 SV=4	105.3									14162.3	22773.4	397958	175813
P63011	Ras-related protein Rab-3A OS=Mus musculus OX=10090 GN=Rab3a PE=1 SV=1	25			160363	2.63361e+06	1.36467e+06	1.11827e+06	51156.1			8.57691e+06	7.4667e+06	5.6377e+06
Q3UHQ6	Protein dopey-2 OS=Mus musculus OX=10090 GN=Dop1b PE=1 SV=3	257.3									102329	861986	57728.9	315673
Q60862	Origin recognition complex subunit 2 OS=Mus musculus OX=10090 GN=Orc2 PE=1 SV=1	65.9	4906923	3.38011e+06	130103	439502		104433	616466	1.21031e+06	245530		370651	966329
O70566	Protein diaphanous homolog 2 OS=Mus musculus OX=10090 GN=Diaph2 PE=1 SV=2	124.8	494585	308472	397429		315403		821197	667110	812751	259897	313592	516424
Q6P5D8	Structural maintenance of chromosomes flexible hinge domain-containing protein 1 OS=Mus musculus OX=10090 GN=Smchd1 PE=1 SV=2	225.5	825061		460432				337148	376483	306003	136428	223630	93235
O88587	Catechol O-methyltransferase OS=Mus musculus OX=10090 GN=Comt PE=1 SV=2	29.5							401381			225786	293820	608483
Q3U0M1	Trafficking protein particle complex subunit 9 OS=Mus musculus OX=10090 GN=Trappc9 PE=1 SV=2	128.2							257354	191218		1.21458e+06	722605	215798
Q9CRD0	OCIA domain-containing protein 1 OS=Mus musculus OX=10090 GN=Ociad1 PE=1 SV=1	27.6	771594	1.52025e+06	1.58724e+06			151079	1.78839e+06	2.14235e+06	1.42149e+06	561213	107929	125506
Q8VDH1	F-box only protein 21 OS=Mus musculus OX=10090 GN=Fbxo21 PE=1 SV=1	72.1							36727.1		311263	525324	217299	423245
Q9D486	C-Maf-inducing protein OS=Mus musculus OX=10090 GN=Cmip PE=1 SV=3	86.2	459733	2.89085e+06	10291898	1.61342e+07	9.72527e+06	1.2453e+07	24022.2	40252.5	843348	3.17322e+06	1.15825e+06	1.94698e+06
Q08879	Fibulin-1 OS=Mus musculus OX=10090 GN=Fbln1 PE=1 SV=2	78										56550.5	87865.5	291252
B7ZMP1	Xaa-Pro aminopeptidase 3 OS=Mus musculus OX=10090 GN=Xpnpep3 PE=1 SV=1	56.6	162598	176789	226066	773926	596143	667752			293904	837964	750843	601269
Q5U4C1	G-protein coupled receptor-associated sorting protein 1 OS=Mus musculus OX=10090 GN=Gprasp1 PE=1 SV=1	151.7									30069.8	381492	65106.8	131877
Q9CRY7	Lysophospholipase D GDPD1 OS=Mus musculus OX=10090 GN=Gdpd1 PE=1 SV=1	35.8		623944	440700	4.17919e+06	5.16853e+06	2.2035e+06	63420.2			1.73776e+06	3.82946e+06	2.82578e+06
Q6IR34	G-protein-signaling modulator 1 OS=Mus musculus OX=10090 GN=Gpsm1 PE=1 SV=3	74.3	657673	454121	321620	6.4294e+06	4.30675e+06	4.30065e+06	200237	253664		5.87003e+06	2.83914e+06	3.1244e+06
Q8VCD6	Receptor expression-enhancing protein 2 OS=Mus musculus OX=10090 GN=Reep2 PE=1 SV=2	28.4	385480		439371	715168	336564	237079				682579	93835	224635
A2AGL3	Ryanodine receptor 3 OS=Mus musculus OX=10090 GN=Ryr3 PE=1 SV=1	551		669061	632726			100695
Q99MK8	Beta-adrenergic receptor kinase 1 OS=Mus musculus OX=10090 GN=Grk2 PE=1 SV=2	79.6								123868		210158	153407	199379
O54818	Tumor protein D53 OS=Mus musculus OX=10090 GN=Tpd52l1 PE=1 SV=1	22.5	485976	534146	585986		288302		563083	529813	552450		396175	454719
P70188	Kinesin-associated protein 3 OS=Mus musculus OX=10090 GN=Kifap3 PE=1 SV=1	91.2		266157	261822	371776	364408					276883	230487
Q04690	Neurofibromin OS=Mus musculus OX=10090 GN=Nf1 PE=1 SV=1	319.4	81031.4	85010.6	224107	1.36057e+06	1.42549e+06	385668		83827.3	3283.93	965636	546616	207885
O70166	Stathmin-3 OS=Mus musculus OX=10090 GN=Stmn3 PE=1 SV=1	20.9								235469		360418	178632	218102
Q6NVF4	DNA helicase B OS=Mus musculus OX=10090 GN=Helb PE=1 SV=2	121.4	174035		1.2192e+06				2.93111e+06	2.75452e+06	2.5911e+06	2.43841e+06	1.65797e+06	341617
P11087	Collagen alpha-1(I) chain OS=Mus musculus OX=10090 GN=Col1a1 PE=1 SV=4	137.9			143183		40268	120246				196997	32796	174248
P07309	Transthyretin OS=Mus musculus OX=10090 GN=Ttr PE=1 SV=1	15.8									335382		829480	1.75049e+06
P51943	Cyclin-A2 OS=Mus musculus OX=10090 GN=Ccna2 PE=1 SV=2	47.2		1.26437e+06	767471				3.59286e+06	4.21045e+06	4.10893e+06	819256	805148	894451
P43346	Deoxycytidine kinase OS=Mus musculus OX=10090 GN=Dck PE=1 SV=1	30.3							292208		336184	387147	1.03508e+06	618708
P11276	Fibronectin OS=Mus musculus OX=10090 GN=Fn1 PE=1 SV=4	272.4	61228.8	499700	175129	25642.7		30426.6	602380	1.04644e+06	989052	488694	355225	262935
Q8CE50	Sorting nexin-30 OS=Mus musculus OX=10090 GN=Snx30 PE=1 SV=1	49.5	500472	764282	434061	342878		154299
Q62176	RNA-binding protein 38 OS=Mus musculus OX=10090 GN=Rbm38 PE=1 SV=2	25.3	235516	245899	275285	220507			985034	935218	961379	231666	681314	558520
Q9ESN9	C-Jun-amino-terminal kinase-interacting protein 3 OS=Mus musculus OX=10090 GN=Mapk8ip3 PE=1 SV=1	147.5										168199		421659
Q61301	Catenin alpha-2 OS=Mus musculus OX=10090 GN=Ctnna2 PE=1 SV=3	105.2	106529	867849	132453	1.46149e+06	766699	1.17361e+06		1.67432e+06	207321	4.24422e+06	1.70387e+06	3.64933e+06
P25976	Nucleolar transcription factor 1 OS=Mus musculus OX=10090 GN=Ubtf PE=1 SV=1	89.5	2.12833e+06	1.18281e+06	686446	649968	119032		1.34971e+07	1.51918e+07	4.30067e+06	2.92626e+06	1.9355e+06	3.07206e+06
Q6Y7W8	GRB10-interacting GYF protein 2 OS=Mus musculus OX=10090 GN=Gigyf2 PE=1 SV=2	149.1	3.70975e+06	7.91219e+06	3.97444e+06		215488	905393	6.87981e+06	5.9163e+06	5.42181e+06	911548	244934	737187
P28652	Calcium/calmodulin-dependent protein kinase type II subunit beta OS=Mus musculus OX=10090 GN=Camk2b PE=1 SV=2	60.4				1.2423e+06	341951				154504	3.83887e+06	704820	4.01375e+06
Q6QD59	Vesicle transport protein SEC20 OS=Mus musculus OX=10090 GN=Bnip1 PE=1 SV=1	26.2	545772	522925	721669	628606		492920	610362	716745	1.38153e+06	757191	483276	1.07072e+06
P63089	Pleiotrophin OS=Mus musculus OX=10090 GN=Ptn PE=1 SV=1	18.9					261345	403002				727560	657124	1.04827e+06
P41778	Pre-B-cell leukemia transcription factor 1 OS=Mus musculus OX=10090 GN=Pbx1 PE=1 SV=2	46.6	312960	869043	107037	1.58637e+06	1.6291e+06	1.63317e+06	343646	299935		2.90291e+06	1.21704e+06	2.10689e+06
Q99N28	Cell adhesion molecule 3 OS=Mus musculus OX=10090 GN=Cadm3 PE=1 SV=1	42.9										224944	41063.3	69455.6
Q8BP00	IQ calmodulin-binding motif-containing protein 1 OS=Mus musculus OX=10090 GN=Iqcb1 PE=1 SV=2	68.7							54532.9		113999	343259	182835	197590
Q8CF89	TGF-beta-activated kinase 1 and MAP3K7-binding protein 1 OS=Mus musculus OX=10090 GN=Tab1 PE=1 SV=2	54.6									54565.3	99229.4	81471.8	210161
Q9JMK2	Casein kinase I isoform epsilon OS=Mus musculus OX=10090 GN=Csnk1e PE=1 SV=2	47.3	142443	146078					932804	1.36859e+06	478167	884413	500007	708981
P06801	NADP-dependent malic enzyme OS=Mus musculus OX=10090 GN=Me1 PE=1 SV=2	63.9	275421		258058	306536	361159	997296	1.65945e+06		1.24147e+06	10565963	4.08457e+06	3138066
Q3UA37	Glutamine-rich protein 1 OS=Mus musculus OX=10090 GN=Qrich1 PE=1 SV=1	86.5	403942	286611	644348		200989	339897	6.00615e+06	5.3283e+06	4.92235e+06	3.15483e+06	3.46157e+06	4.55894e+06
P70211	Netrin receptor DCC OS=Mus musculus OX=10090 GN=Dcc PE=1 SV=2	158.2						67918.1				99682.4	121698	251462
Q99M87	DnaJ homolog subfamily A member 3, mitochondrial OS=Mus musculus OX=10090 GN=Dnaja3 PE=1 SV=1	52.4	1.57553e+06	2.37947e+06	639944	45851.1			2.6038e+06	2.61347e+06	1.71055e+06	257247	308642
Q921M4	Golgin subfamily A member 2 OS=Mus musculus OX=10090 GN=Golga2 PE=1 SV=3	113.2	152820		602472					487736				67040.8
Q9Z148	Histone-lysine N-methyltransferase EHMT2 OS=Mus musculus OX=10090 GN=Ehmt2 PE=1 SV=2	138							60595.8	630278		838261	129888	292770
Q8R3C0	Mini-chromosome maintenance complex-binding protein OS=Mus musculus OX=10090 GN=Mcmbp PE=1 SV=1	72.8	1.31959e+06	930007	1.12825e+06	68869.2	164171	172509	4.29212e+06	3.43253e+06	9.86592e+06	1.77693e+06	828394	2.43652e+06
Q8BTG7	Protein NDRG4 OS=Mus musculus OX=10090 GN=Ndrg4 PE=1 SV=1	38.5				270201	123053				36798.5	1.29905e+06	564355	140792
Q80TJ1	Calcium-dependent secretion activator 1 OS=Mus musculus OX=10090 GN=Cadps PE=1 SV=3	153	1.20195e+06	176773	1.43633e+06	860604	880135	478776			493343	1.54603e+06	291754
P62257	Ubiquitin-conjugating enzyme E2 H OS=Mus musculus OX=10090 GN=Ube2h PE=1 SV=1	20.6		43404.1			67180.5	82905.7	67848.8	63364.6	225863	898313	484233	744665
Q04857	Collagen alpha-1(VI) chain OS=Mus musculus OX=10090 GN=Col6a1 PE=1 SV=1	108.4	9452.02			62325.2	26473.2	43300.9	5658.64	12295.3	32498	226122	103846	127185
P33173	Kinesin-like protein KIF1A OS=Mus musculus OX=10090 GN=Kif1a PE=1 SV=2	191.6	433288	372455	529037	2.47666e+06	1.95939e+06	1.73892e+06	408695	321946	1.41341e+06	7.11476e+06	6.29537e+06	5.62227e+06
P48318	Glutamate decarboxylase 1 OS=Mus musculus OX=10090 GN=Gad1 PE=1 SV=2	66.6							230670	79025.8	244923	1.00499e+06	567682	343969
Q811U4	Mitofusin-1 OS=Mus musculus OX=10090 GN=Mfn1 PE=1 SV=3	83.7	355788	498888	573592	319530			2.59352e+06	1.54458e+06	1.52793e+06	695169	484383	147942
Q6GU68	Immunoglobulin superfamily containing leucine-rich repeat protein OS=Mus musculus OX=10090 GN=Islr PE=1 SV=1	45.6										297035	89709.2
Q61066	Nuclear receptor subfamily 0 group B member 1 OS=Mus musculus OX=10090 GN=Nr0b1 PE=1 SV=1	52.5	121744	129042	94794.3				6.58374e+06	6.86272e+06	2.4366e+06	2.67396e+06	2.28275e+06	458282
P61963	DDB1- and CUL4-associated factor 7 OS=Mus musculus OX=10090 GN=Dcaf7 PE=1 SV=1	38.9	2.50033e+06	2.15218e+06	2.0414e+06	4.41997e+06	1.57207e+06	2.50408e+06	975543	1.23256e+06	1.19352e+06	4.38042e+06	2.00871e+06	3.14482e+06
P97742	Carnitine O-palmitoyltransferase 1, liver isoform OS=Mus musculus OX=10090 GN=Cpt1a PE=1 SV=4	88.2	71631.2	81275.8	83198.1		201799	214311	164967				251061	307828
Q60899	ELAV-like protein 2 OS=Mus musculus OX=10090 GN=Elavl2 PE=2 SV=1	39.6									117187	211651	53735.6	208975
Q8JZV7	N-acetylglucosamine-6-phosphate deacetylase OS=Mus musculus OX=10090 GN=Amdhd2 PE=1 SV=1	43.5	381842	395752	1.23449e+06		656804			58972.2	194232
Q9D832	DnaJ homolog subfamily B member 4 OS=Mus musculus OX=10090 GN=Dnajb4 PE=1 SV=1	37.8				292648			53122.5	70450.6		484278	454672	186593
Q91ZU6	Dystonin OS=Mus musculus OX=10090 GN=Dst PE=1 SV=2	833.7	159922		198873		57896.4	45986.5	876335	696833	1.01084e+06	1.5273e+06	585606	1.02252e+06
P47877	Insulin-like growth factor-binding protein 2 OS=Mus musculus OX=10090 GN=Igfbp2 PE=2 SV=2	32.8	469859	241311	264727	627353	1.35336e+06	1.00518e+06	612198	470432	351904	1.67505e+06	3.28214e+06	5.67664e+06
Q80W15	Insulin-like growth factor-binding protein-like 1 OS=Mus musculus OX=10090 GN=Igfbpl1 PE=2 SV=1	28.6					75524.6	126021				203012	151314	434532
Q9JHS4	ATP-dependent Clp protease ATP-binding subunit clpX-like, mitochondrial OS=Mus musculus OX=10090 GN=Clpx PE=1 SV=2	69.2	531337	279834	465992		43999.5		4.32713e+06	5.06122e+06	5.99899e+06	301330	950789	533796
Q9DBE8	Alpha-1,3/1,6-mannosyltransferase ALG2 OS=Mus musculus OX=10090 GN=Alg2 PE=1 SV=2	47.4	1.97095e+06	6.3618e+06	5.44122e+06	3.65098e+07	2.57617e+07	1.97663e+07	625309	543999	1.14988e+06	1.56774e+07	1.18674e+07	5.55843e+06
Q924Z6	Exportin-6 OS=Mus musculus OX=10090 GN=Xpo6 PE=1 SV=2	128.6	333551	463493	267808	99452.3	404752	461948	60481.6		8402.15	44106.7	101538
P70236	Dual specificity mitogen-activated protein kinase kinase 6 OS=Mus musculus OX=10090 GN=Map2k6 PE=1 SV=1	37.4	885631	342667	832887	7428844	7.47635e+06	6.6499e+06	551894		532970	1.15976e+07	7.71142e+06	1.06257e+06
Q9QYE6	Golgin subfamily A member 5 OS=Mus musculus OX=10090 GN=Golga5 PE=1 SV=2	82.3	193223		226157				219268	227799	292541	65623.7	46291.3	286092
Q9JLQ0	CD2-associated protein OS=Mus musculus OX=10090 GN=Cd2ap PE=1 SV=3	70.4	683942	68121.8	580185		240173	47981.9	3.16554e+06	3.62762e+06	4.9859e+06	2.78316e+06	931073	1.48306e+06
Q61458	Cyclin-H OS=Mus musculus OX=10090 GN=Ccnh PE=1 SV=2	37.5	612358	324146	368970			145905	4.37675e+06	4.75238e+06	5.46626e+06	1.38085e+06	276853	1.21046e+06
Q8C1B1	Calmodulin-regulated spectrin-associated protein 2 OS=Mus musculus OX=10090 GN=Camsap2 PE=1 SV=3	164.2				598693	180900					917224	193100	407075
Q9Z1K6	E3 ubiquitin-protein ligase ARIH2 OS=Mus musculus OX=10090 GN=Arih2 PE=1 SV=1	57.7	154125	148397	51618		76149.6	88643.4	37092.6	29669.2	113303	34812.9		206902
Q8BGF6	ELMO domain-containing protein 2 OS=Mus musculus OX=10090 GN=Elmod2 PE=1 SV=1	34.7							743357			695435	775521
P16014	Secretogranin-1 OS=Mus musculus OX=10090 GN=Chgb PE=1 SV=2	77.9										152013		97694.5
P47740	Fatty aldehyde dehydrogenase OS=Mus musculus OX=10090 GN=Aldh3a2 PE=1 SV=2	53.9	1.05793e+06	1185156	1.09662e+06	256486	570142		147122	182253	128623			237621
O88509	DNA (cytosine-5)-methyltransferase 3B OS=Mus musculus OX=10090 GN=Dnmt3b PE=1 SV=2	97.2							342868	570602	41293.4	980298	1.03034e+06	215480
P49919	Cyclin-dependent kinase inhibitor 1C OS=Mus musculus OX=10090 GN=Cdkn1c PE=1 SV=2	37.3				541269	292033	202096	56469.8	29042.7		1.91045e+06	1.8657e+06	2.53316e+06
P59328	WD repeat and HMG-box DNA-binding protein 1 OS=Mus musculus OX=10090 GN=Wdhd1 PE=1 SV=2	124.2	1.0141e+06	816653	881746	385808	510971	116662	4.54851e+06	5.45908e+06	4.63531e+06	2.288e+07	1.03506e+07	127398
Q9Z1S5	Neuronal-specific septin-3 OS=Mus musculus OX=10090 GN=Sept3 PE=1 SV=2	40	505140	99008.3	389097	2.14361e+07	1.15999e+07	1.10193e+07	45576.5	140584	42142.2	1.04284e+07	6.15578e+06	4.79089e+06
Q8BHZ0	Protein FAM49A OS=Mus musculus OX=10090 GN=Fam49a PE=1 SV=1	37.3	382393	783375	851713	758717	310564	768926	1.70613e+06	1.27614e+06	1.09028e+06	3.00316e+06	2.32862e+06	1.92054e+06
O88196	E3 ubiquitin-protein ligase TTC3 OS=Mus musculus OX=10090 GN=Ttc3 PE=1 SV=2	223.8					135231	167774		110774	159831	1.28849e+06	951431	827588
Q91X78	Erlin-1 OS=Mus musculus OX=10090 GN=Erlin1 PE=1 SV=1	38.9										109264	157898
Q9DBN9	Probable ATP-dependent RNA helicase DDX59 OS=Mus musculus OX=10090 GN=Ddx59 PE=1 SV=1	68.2							341208	257572	396177	983370	1.03512e+06	987049
Q6A065	Centrosomal protein of 170 kDa OS=Mus musculus OX=10090 GN=Cep170 PE=1 SV=2	174.9	1.29849e+06	1.21017e+06	1.13102e+06	5.15133e+06	3.14287e+06	4.33716e+06	386755	334481	763221	4.08742e+06	2.22068e+06	3.16426e+06
P46414	Cyclin-dependent kinase inhibitor 1B OS=Mus musculus OX=10090 GN=Cdkn1b PE=1 SV=2	22.2		94490.5		1.62429e+06	2.26431e+06	1.83462e+06				3.61363e+06	4.44768e+06	3.30192e+06
Q8K3Y3	Protein lin-28 homolog A OS=Mus musculus OX=10090 GN=Lin28a PE=1 SV=1	22.7	2.21852e+06	2.48498e+06	2.80677e+06	83563.6		85969	6.32448e+06	1.07035e+07	1.15209e+07	362278	234336	516078
A2AF47	Dedicator of cytokinesis protein 11 OS=Mus musculus OX=10090 GN=Dock11 PE=1 SV=1	237.6	283920	731954	440665	1.20593e+06	1205369	1447167			296670	358826	362307	198221
O88520	Leucine-rich repeat protein SHOC-2 OS=Mus musculus OX=10090 GN=Shoc2 PE=1 SV=2	64.9	311711	268818	173825	163890	262821		945794	717681	429260	723773	406950	287064
P35505	Fumarylacetoacetase OS=Mus musculus OX=10090 GN=Fah PE=1 SV=2	46.1	190750	112820	522370				1.7262e+06	1.70925e+06	2.68307e+06	455465	307701	117783
A2A8L5	Receptor-type tyrosine-protein phosphatase F OS=Mus musculus OX=10090 GN=Ptprf PE=1 SV=1	211.4	644604	658279	489855	27985.7		403714	962530	560838	984167	49347.9	56857.1	1.01891e+06
Q9ERI5	Bifunctional arginine demethylase and lysyl-hydroxylase JMJD6 OS=Mus musculus OX=10090 GN=Jmjd6 PE=1 SV=2	46.5	526009	627916	550938	341318		93894.6	1.18649e+06	1.57914e+06	917590	464295	272797	270642
Q9D394	Protein RUFY3 OS=Mus musculus OX=10090 GN=Rufy3 PE=1 SV=1	53	1.50152e+06	1.60406e+06	1.53669e+06	2.95978e+07	2.02601e+07	1.63753e+07	898532	770790	531872	2.55831e+07	1.57934e+07	1.49791e+07
Q91XD7	Cysteine-rich with EGF-like domain protein 1 OS=Mus musculus OX=10090 GN=Creld1 PE=1 SV=1	45.7	1.12304e+06	796338	462615	3.60864e+06	2.06097e+06	2.06726e+06		837903	607356	1.20231e+06	1.92617e+06	1.01493e+06
E9Q6W4	Zinc finger protein 296 OS=Mus musculus OX=10090 GN=Znf296 PE=1 SV=1	47.8							34335.9	189381		109397	189514	114080
P58064	28S ribosomal protein S6, mitochondrial OS=Mus musculus OX=10090 GN=Mrps6 PE=1 SV=3	14.3	1.76326e+06	1.45614e+06	1.49799e+06		37407.8		5.2978e+06	7.07012e+06	3.43731e+06		515848	195371
Q9QYI4	DnaJ homolog subfamily B member 12 OS=Mus musculus OX=10090 GN=Dnajb12 PE=1 SV=2	42	79443.1	69011.2	80881.2				334272	448004	183667	114809	104544	89616.5
Q3UHC7	Disabled homolog 2-interacting protein OS=Mus musculus OX=10090 GN=Dab2ip PE=1 SV=1	131.6	143509	183532	557672	400607	114083	302971			67178.8	97997.3		123788
P56183	Ribosomal RNA processing protein 1 homolog A OS=Mus musculus OX=10090 GN=Rrp1 PE=1 SV=2	54.7	686707	610793	150617			392650	4.83117e+06	7.09834e+06	4858008	875192	1.36418e+06	1.24806e+06
Q62356	Follistatin-related protein 1 OS=Mus musculus OX=10090 GN=Fstl1 PE=1 SV=2	34.5				214743	62915.3	203302		65825.4	150587	1.43922e+06	1.79099e+06	1.17223e+06
Q5SX40	Myosin-1 OS=Mus musculus OX=10090 GN=Myh1 PE=1 SV=1	223.2	338391	405922	253083			36859.1	134452	49785.8	222472
P36552	Oxygen-dependent coproporphyrinogen-III oxidase, mitochondrial OS=Mus musculus OX=10090 GN=Cpox PE=1 SV=2	49.7	225698	117147	440879	270219			2.9208e+06	2.28281e+06	3.25068e+06	943761	918713	693592
Q8CHH9	Septin-8 OS=Mus musculus OX=10090 GN=Sept8 PE=1 SV=4	49.8		137309	230156			71994.1
Q8CFI2	Ubiquitin-conjugating enzyme E2 R1 OS=Mus musculus OX=10090 GN=Cdc34 PE=1 SV=1	26.6	507044	304346					5.44662e+06	3.99495e+06	6.41325e+06	1.84651e+06	1436574	781811
Q8BJF9	Charged multivesicular body protein 2b OS=Mus musculus OX=10090 GN=Chmp2b PE=1 SV=1	23.9							93023.6	361954	404484	1.38595e+06	704699	237729
Q9Z2R6	Protein unc-119 homolog A OS=Mus musculus OX=10090 GN=Unc119 PE=1 SV=1	27							142613	346623		195664	428986	227025
Q9JLM8	Serine/threonine-protein kinase DCLK1 OS=Mus musculus OX=10090 GN=Dclk1 PE=1 SV=1	84.1	520462	762408	1.13605e+06	4.67876e+07	2.60487e+07	2.3495e+07	473921	288727	533947	4.94309e+07	2.33589e+07	2.08303e+07
O88307	Sortilin-related receptor OS=Mus musculus OX=10090 GN=Sorl1 PE=1 SV=3	246.9			441666
Q9DB73	NADH-cytochrome b5 reductase 1 OS=Mus musculus OX=10090 GN=Cyb5r1 PE=1 SV=1	34.1	81979.9	995364	967821	102656	89006		2.41425e+06	1.88115e+06	3.19417e+06	492730	976586	205945
Q61548	Clathrin coat assembly protein AP180 OS=Mus musculus OX=10090 GN=Snap91 PE=1 SV=1	91.8	419853	159645	323393	3.19893e+06	1.23509e+06	1.05565e+06	152933	321795		895571	1.56537e+06	592625
O08663	Methionine aminopeptidase 2 OS=Mus musculus OX=10090 GN=Metap2 PE=1 SV=1	52.9	246584	467773	588013	649821	197353		4.95628e+06	5.49672e+06	4.88309e+06	2.93284e+06	2.98969e+06	1.63249e+06
Q3U3W5	Protein arginine N-methyltransferase 9 OS=Mus musculus OX=10090 GN=Prmt9 PE=2 SV=2	94.2		623561
G5E8K5	Ankyrin-3 OS=Mus musculus OX=10090 GN=Ank3 PE=1 SV=1	213.9										83058.7		99906.5
Q8R1A4	Dedicator of cytokinesis protein 7 OS=Mus musculus OX=10090 GN=Dock7 PE=1 SV=3	241.3	1.79153e+06	3.00629e+06	1.73917e+06	5.05615e+06	9.58391e+06	9.8577e+06	499361	419230	641515	3.05398e+06	3.38217e+06	2.74553e+06
Q8BM55	Transmembrane protein 214 OS=Mus musculus OX=10090 GN=Tmem214 PE=1 SV=1	76.4	406600	346078	456433		145920	88730.5	4.19645e+06	4.32358e+06	3.8819e+06	1.01071e+06	987846	943595
Q6P9Q6	FK506-binding protein 15 OS=Mus musculus OX=10090 GN=Fkbp15 PE=1 SV=2	132.9							170623	675586	168778	573377	401932	1.1366e+06
P15535	Beta-1,4-galactosyltransferase 1 OS=Mus musculus OX=10090 GN=B4galt1 PE=1 SV=1	44.4									159422	293331		219854
P35761	Dual specificity protein kinase TTK OS=Mus musculus OX=10090 GN=Ttk PE=1 SV=1	96.2		53127.9	1.21912e+06				3.21315e+06	4.35456e+06	3.82387e+06	1.75056e+06	1.11951e+06	520102
P11627	Neural cell adhesion molecule L1 OS=Mus musculus OX=10090 GN=L1cam PE=1 SV=1	140.9	71255.2	59184.9		178583	118077	106567				794230	234807
Q9JJZ2	Tubulin alpha-8 chain OS=Mus musculus OX=10090 GN=Tuba8 PE=1 SV=1	50	515579	604818	615098	853214	727195
Q91YM2	Rho GTPase-activating protein 35 OS=Mus musculus OX=10090 GN=Arhgap35 PE=1 SV=3	170.3	440273	192770	321638	755032	633373	347783	220119	718700	602021	1.50107e+06	1.20796e+06	1.22683e+06
P61219	DNA-directed RNA polymerases I, II, and III subunit RPABC2 OS=Mus musculus OX=10090 GN=Polr2f PE=2 SV=1	14.5		1.11822e+06					638744	612388	370310	259890	242519	285406
Q9R0E1	Multifunctional procollagen lysine hydroxylase and glycosyltransferase LH3 OS=Mus musculus OX=10090 GN=Plod3 PE=1 SV=1	84.9	50023	189077	386577	84265.8	145645	416102	218233	381413		834078		815297
Q9QYG0	Protein NDRG2 OS=Mus musculus OX=10090 GN=Ndrg2 PE=1 SV=1	40.8	248976	531414	284715	3.80385e+06	1.8407e+06	1.2278e+06	213130	180902	224188	3.28221e+06	1.6069e+06	1.41483e+06
Q9CQW2	ADP-ribosylation factor-like protein 8B OS=Mus musculus OX=10090 GN=Arl8b PE=1 SV=1	21.5	120222	240056	135457		161275	373208	524380	724669	544799	927363	608345	314727
P25799	Nuclear factor NF-kappa-B p105 subunit OS=Mus musculus OX=10090 GN=Nfkb1 PE=1 SV=2	105.5	199856	1.03073e+06		150711		82220	820797	1.00706e+06	602645	571688	828354	397424
Q5SQX6	Cytoplasmic FMR1-interacting protein 2 OS=Mus musculus OX=10090 GN=Cyfip2 PE=1 SV=2	145.6	1.24394e+06	1384529	924187	3.02582e+06	2.83908e+06	2.25603e+06	219710	290520	221590	1.99453e+06	578767	550423
O88736	3-keto-steroid reductase OS=Mus musculus OX=10090 GN=Hsd17b7 PE=1 SV=1	37.3				44479		60889.9			122798	282599	178126	192547
Q69ZR2	E3 ubiquitin-protein ligase HECTD1 OS=Mus musculus OX=10090 GN=Hectd1 PE=1 SV=2	289.9			220540				666568	632809	707132	539811	520355	493712
Q9D0Q7	39S ribosomal protein L45, mitochondrial OS=Mus musculus OX=10090 GN=Mrpl45 PE=1 SV=1	35.4	144272	219239	185164	55709.5	128164	23263.4	728740	922850	626501	593125		5.82984e+06
Q60992	Guanine nucleotide exchange factor VAV2 OS=Mus musculus OX=10090 GN=Vav2 PE=1 SV=1	99.9			113070	58047.9	107093		549190	276293		477127	470415	250399
Q6A0A2	La-related protein 4B OS=Mus musculus OX=10090 GN=Larp4b PE=1 SV=2	81.6	666675	37689.8	604643			42077.1	508945	780268	799912	230619		293898
Q9R0L6	Pericentriolar material 1 protein OS=Mus musculus OX=10090 GN=Pcm1 PE=1 SV=2	228.7		257138					2.29716e+06	2.24297e+06	1.11492e+06	1.22356e+06	1.61665e+06	1.61237e+06
O88974	Histone-lysine N-methyltransferase SETDB1 OS=Mus musculus OX=10090 GN=Setdb1 PE=1 SV=1	144.5	187049	448402					2.48312e+06	2.36957e+06	2.21286e+06	871498	854724	306864
Q6P5B0	RRP12-like protein OS=Mus musculus OX=10090 GN=Rrp12 PE=1 SV=1	143	1.22067e+06	863981	1.97876e+06	366411	105292		1.12134e+07	1.21109e+07	1.12457e+07	1.57568e+06	785303	1.00043e+06
Q8BPP1	Protein mab-21-like 2 OS=Mus musculus OX=10090 GN=Mab21l2 PE=2 SV=1	40.9			247721	1.24964e+06	342274	449537				626022	502990	554505
Q8C7M3	E3 ubiquitin-protein ligase TRIM9 OS=Mus musculus OX=10090 GN=Trim9 PE=1 SV=2	90.8							279673	421925		766394	91287.2	376906
Q400C8	Archaemetzincin-2 OS=Mus musculus OX=10090 GN=Amz2 PE=2 SV=1	41.3		112598		207630		129910			67670.2	203008	82228.8	254147
P97364	Selenide, water dikinase 2 OS=Mus musculus OX=10090 GN=Sephs2 PE=1 SV=3	47.8							578844		287275	348745	269815	386238
Q8C5P5	5'-nucleotidase domain-containing protein 1 OS=Mus musculus OX=10090 GN=Nt5dc1 PE=1 SV=2	53.1								626908	504852	586941	371550	445159
Q6ZPE2	Myotubularin-related protein 5 OS=Mus musculus OX=10090 GN=Sbf1 PE=1 SV=2	208.6	298596	78735.6	325675	513798	183236	156328	9.18737e+06	6.48345e+06	1.04499e+07	1.88463e+07	1.0296e+07	2.05522e+07
P53798	Squalene synthase OS=Mus musculus OX=10090 GN=Fdft1 PE=1 SV=2	48.1	122471						3.19093e+06	2.70689e+06	2.25129e+06	2.45949e+06	2.6765e+06	2.21181e+06
Q8K298	Anillin OS=Mus musculus OX=10090 GN=Anln PE=1 SV=2	122.7	448423	834185	714387			44450.3	2.00265e+07	2.43864e+07	1.41253e+07	881440	780136	1.16624e+06
P51912	Neutral amino acid transporter B(0) OS=Mus musculus OX=10090 GN=Slc1a5 PE=1 SV=2	58.4	597572	383214	993413	748929			3.07632e+06	2.56446e+06	3.74251e+06	424559	122988	1.09152e+06
E9Q735	Ubiquitin conjugation factor E4 A OS=Mus musculus OX=10090 GN=Ube4a PE=1 SV=1	118.1							207585	354254		235338	257618	188245
Q9D9Z5	DET1- and DDB1-associated protein 1 OS=Mus musculus OX=10090 GN=Dda1 PE=1 SV=1	11.7	350815	610552	351418	215095	181022	178087	455112	623106	765840	364382	294357	572432
Q3UFS0	Protein zyg-11 homolog B OS=Mus musculus OX=10090 GN=Zyg11b PE=1 SV=2	83.9							56871.4	97962.4	301650	463560	125224	387798
P70423	Cationic amino acid transporter 3 OS=Mus musculus OX=10090 GN=Slc7a3 PE=2 SV=1	67.4	509946	469719	418983	62951.1	12602.9	33603.1	3.12474e+06	3.3506e+06	4.5066e+06	413116	399612	225566
Q8K268	ATP-binding cassette sub-family F member 3 OS=Mus musculus OX=10090 GN=Abcf3 PE=1 SV=1	79.8	161088	171002	337944		23814.8	163138	1.42976e+06	1.58023e+06	1.72168e+06	214399	379201	943458
O88696	ATP-dependent Clp protease proteolytic subunit, mitochondrial OS=Mus musculus OX=10090 GN=Clpp PE=1 SV=1	29.8	2.54759e+06	2.80946e+06	6.17396e+06	4.44143e+06	4.99069e+06	6.49203e+06	5.92918e+07	5.78581e+07	7.39734e+07	1.68054e+08	1.22475e+08	1.15876e+08
Q9DB40	Mediator of RNA polymerase II transcription subunit 27 OS=Mus musculus OX=10090 GN=Med27 PE=2 SV=2	35.3		98618.2	73609.1				1.42146e+06	1.43672e+06	1.50272e+06	320896	1.52733e+06	814037
P56371	Ras-related protein Rab-4A OS=Mus musculus OX=10090 GN=Rab4a PE=1 SV=2	24.4							229905	213079		304726	170142	136580
O88448	Kinesin light chain 2 OS=Mus musculus OX=10090 GN=Klc2 PE=1 SV=1	66.6	97979.3	1.23385e+06	1.92365e+06	4.82143e+06	2.62691e+06	1.93602e+06	171117	1.35902e+06	100313	3343892	1.23332e+06	1.70069e+06
Q6PR54	Telomere-associated protein RIF1 OS=Mus musculus OX=10090 GN=Rif1 PE=1 SV=2	266.1	2.68147e+06	3.00383e+06	2.74389e+06	289839		423596	5.1132e+06	7.25356e+06	2.67995e+06	355728	243121	275001
O35375	Neuropilin-2 OS=Mus musculus OX=10090 GN=Nrp2 PE=1 SV=2	104.6				186843		74527.6		99247.7		874071	183534	166363
Q8BH66	Atlastin-1 OS=Mus musculus OX=10090 GN=Atl1 PE=1 SV=1	63.3	309580		132599	1.73607e+06	1.2734e+06	881313	414059			1.55227e+06	1.42171e+06	835504
Q3UMG5	Leucine-rich repeat and calponin homology domain-containing protein 2 OS=Mus musculus OX=10090 GN=Lrch2 PE=2 SV=2	84.9							77091.3			157449	104610
Q9R0A0	Peroxisomal membrane protein PEX14 OS=Mus musculus OX=10090 GN=Pex14 PE=1 SV=1	41.2	1.24798e+07	1.30602e+06	960807	571256	1.78822e+06	485888	698537	1.22307e+06	2.82133e+06	391774	1.2655e+06	406634
Q60960	Importin subunit alpha-5 OS=Mus musculus OX=10090 GN=Kpna1 PE=1 SV=2	60.1	2.34562e+06	550250	822648	538248		1.09913e+06	7.02536e+06	3.74187e+06	5.816e+06	2.17709e+06	802765	1.8825e+06
A2AAY5	SH3 and PX domain-containing protein 2B OS=Mus musculus OX=10090 GN=Sh3pxd2b PE=1 SV=1	101.5	181836	139110	245103	983311	985625	556291		22863.7	182922	453504	166547	240268
P28867	Protein kinase C delta type OS=Mus musculus OX=10090 GN=Prkcd PE=1 SV=3	77.5												292987
Q9DCU6	39S ribosomal protein L4, mitochondrial OS=Mus musculus OX=10090 GN=Mrpl4 PE=1 SV=1	33.1	146229	188242	111117			75296.1	1.00462e+06	1.03126e+06	672297	113202	346892	218851
Q8BPN8	DmX-like protein 2 OS=Mus musculus OX=10090 GN=Dmxl2 PE=1 SV=3	338										115162		48730.7
P62761	Visinin-like protein 1 OS=Mus musculus OX=10090 GN=Vsnl1 PE=1 SV=2	22.1				258630	162666					707514	241811	76791.3
Q69ZN7	Myoferlin OS=Mus musculus OX=10090 GN=Myof PE=1 SV=2	233.2	217714	257785	1.74703e+06	157022			2.1999e+06	1.58757e+06	2.9192e+06	283268	552019	51293.6
Q80Y55	BSD domain-containing protein 1 OS=Mus musculus OX=10090 GN=Bsdc1 PE=1 SV=1	46.9							58992.8		32486.7	557998		42420.1
Q9EPN1	Neurobeachin OS=Mus musculus OX=10090 GN=Nbea PE=1 SV=1	326.5	834422	1.21789e+06	701901	4.63922e+06	3.00323e+06	2.7626e+06	416866	228017	423313	2.70223e+06	1.1402e+06	1.62397e+06
Q9WVL3	Solute carrier family 12 member 7 OS=Mus musculus OX=10090 GN=Slc12a7 PE=1 SV=1	119.4	665421	267290	298469			113333	1.1162e+06	954403	1.53304e+06	342670	77957.9	75154.1
P63034	Cytohesin-2 OS=Mus musculus OX=10090 GN=Cyth2 PE=1 SV=2	46.6							131996	178005		548160	577940
Q8BMQ2	General transcription factor 3C polypeptide 4 OS=Mus musculus OX=10090 GN=Gtf3c4 PE=1 SV=2	91.6							805838			444496	346448
Q812A2	SLIT-ROBO Rho GTPase-activating protein 3 OS=Mus musculus OX=10090 GN=Srgap3 PE=1 SV=1	124.3	1.55094e+06	2.1594e+06	1.53781e+06	1.07386e+07	1.15883e+07	9.53127e+06	464371	1.66225e+06	731646	8.38372e+06	6.40027e+06	4.94305e+06
Q9QXL1	Kinesin-like protein KIF21B OS=Mus musculus OX=10090 GN=Kif21b PE=1 SV=2	186.1				1.04873e+06	517944	100336				1.64545e+06	1.10339e+06	557621
Q80U78	Pumilio homolog 1 OS=Mus musculus OX=10090 GN=Pum1 PE=1 SV=2	126.5	782195	519614	9.88598e+06	828058	409979	558874	3.48199e+06	5.48e+06	3.5075e+06	1.82039e+06	1.76879e+06	1.84211e+06
P97452	Ribosome biogenesis protein BOP1 OS=Mus musculus OX=10090 GN=Bop1 PE=1 SV=1	82.5	413917	123081	158720			114198	2.8078e+06	3.44549e+06	2.74235e+06	47174.9	1.93021e+06	1.63202e+06
P33610	DNA primase large subunit OS=Mus musculus OX=10090 GN=Prim2 PE=1 SV=1	58.4	1.03571e+06	390223	758959	221446		198925	7.67718e+06	8.99929e+06	8.43659e+06	565127	2.49808e+06	1.55106e+06
Q9EQG9	Collagen type IV alpha-3-binding protein OS=Mus musculus OX=10090 GN=Col4a3bp PE=1 SV=1	71.1		1241086					533700	470064	516273	363207	284084	65592.7
O55111	Desmoglein-2 OS=Mus musculus OX=10090 GN=Dsg2 PE=1 SV=3	122.3							71057.7	107847		335592		190863
Q9QXX4	Calcium-binding mitochondrial carrier protein Aralar2 OS=Mus musculus OX=10090 GN=Slc25a13 PE=1 SV=1	74.4	6.63974e+06	5.00237e+06	4.24764e+06	387124	261446	278031	1.79538e+07	2.11794e+07	19461999	1.34309e+06	1.34128e+06	1.4488e+06
O09118	Netrin-1 OS=Mus musculus OX=10090 GN=Ntn1 PE=1 SV=3	67.8				76804			27454.9	55211.9		552078		104883
Q8CH77	Neuron navigator 1 OS=Mus musculus OX=10090 GN=Nav1 PE=1 SV=2	202.2										36445.7	67523.5	13844.2
Q3UY34	Protein CUSTOS OS=Mus musculus OX=10090 GN=Custos PE=2 SV=1	27.6	324421	485532	249908				446349	442613	93377.6
Q9JLZ8	Single Ig IL-1-related receptor OS=Mus musculus OX=10090 GN=Sigirr PE=1 SV=2	46.1	506053	303473					269818	68752.9	240680		158279
Q61823	Programmed cell death protein 4 OS=Mus musculus OX=10090 GN=Pdcd4 PE=1 SV=1	51.7	257001	1.57667e+06	313553	823205	658482	540670	2.5742e+06	2.48878e+06	3.17399e+06	3.78131e+06	7.63134e+06	2.65039e+06
Q8CH25	SAFB-like transcription modulator OS=Mus musculus OX=10090 GN=Sltm PE=1 SV=1	116.9	117331	97845.1	109245			38179.2	76928.1	116882
Q91VC9	Growth hormone-inducible transmembrane protein OS=Mus musculus OX=10090 GN=Ghitm PE=1 SV=1	37.3	1.77631e+06	929088					995927	895256	705100	75983.8	55487.9	53540.8
P02469	Laminin subunit beta-1 OS=Mus musculus OX=10090 GN=Lamb1 PE=1 SV=3	197									159572	103417		260826
Q920R0	Alsin OS=Mus musculus OX=10090 GN=Als2 PE=1 SV=3	182.5							18413022	33831324	35818900	35410148	39907240	76838776
Q6PDS3	Sterile alpha and TIR motif-containing protein 1 OS=Mus musculus OX=10090 GN=Sarm1 PE=1 SV=1	79.6			421076	784195	878054	241886				627286	332819	190717
Q9D8X1	Copper homeostasis protein cutC homolog OS=Mus musculus OX=10090 GN=Cutc PE=1 SV=1	29	313627	314117	290024	3656726	2.61262e+06	3.28041e+06			200092	1.14234e+06	1.23474e+06	94861.2
Q9R1Q7	Proteolipid protein 2 OS=Mus musculus OX=10090 GN=Plp2 PE=1 SV=1	16.6	106407	124068	178333		130629	87643.4	45531
A2ASQ1	Agrin OS=Mus musculus OX=10090 GN=Agrn PE=1 SV=1	207.4									34283.4	45317.1		169843
P28738	Kinesin heavy chain isoform 5C OS=Mus musculus OX=10090 GN=Kif5c PE=1 SV=3	109.2	1.34852e+06	470249	692426	2.63119e+07	1.872e+07	1.62827e+07	1.41135e+06	647422	502948	3.12796e+07	1.92264e+07	1.96101e+07
Q8C5L3	CCR4-NOT transcription complex subunit 2 OS=Mus musculus OX=10090 GN=Cnot2 PE=1 SV=2	59.7	78022.3	90948.9	101892	101402		130847	1.25078e+06	1.44416e+06	1.45587e+06	1.10161e+06	1.16384e+06	792503
Q8JZX4	Splicing factor 45 OS=Mus musculus OX=10090 GN=Rbm17 PE=1 SV=1	45.3	352408	282380					1.4026e+06	1.44925e+06	256942	126724	95062	204206
O88907	E3 SUMO-protein ligase PIAS1 OS=Mus musculus OX=10090 GN=Pias1 PE=1 SV=2	71.6										268603
Q3ULF4	Paraplegin OS=Mus musculus OX=10090 GN=Spg7 PE=1 SV=1	85.9	91756.2		218141				6.89091e+06	3.95281e+06	5.86643e+06	1.38527e+06	1.92221e+06	1.58491e+06
O88967	ATP-dependent zinc metalloprotease YME1L1 OS=Mus musculus OX=10090 GN=Yme1l1 PE=1 SV=1	80	677159	624640	1.15222e+06	92606.8	146761		3.84101e+06	4.93084e+06	4.72306e+06	433477	431338	247211
Q8BZH4	Pogo transposable element with ZNF domain OS=Mus musculus OX=10090 GN=Pogz PE=1 SV=2	154.8							434129	431131	409840	662248	518837	1.19213e+06
Q64337	Sequestosome-1 OS=Mus musculus OX=10090 GN=Sqstm1 PE=1 SV=1	48.1	149057	146782	278374	170867		298725	274103	681222	398363	448690	62357.7	428084
Q01320	DNA topoisomerase 2-alpha OS=Mus musculus OX=10090 GN=Top2a PE=1 SV=2	172.7	256293	287721	317785	114604	249180	78849.5	6.71545e+06	6.28812e+06	6.36445e+06	3.9798e+06	3.38596e+06	2.55516e+06
Q99MR0	Actin-like protein 6B OS=Mus musculus OX=10090 GN=Actl6b PE=1 SV=1	46.9										233444
A6H5Y3	Methionine synthase OS=Mus musculus OX=10090 GN=Mtr PE=1 SV=1	139	1.52564e+06	1.47584e+06	2423838			336411	2.29962e+06	2.01685e+06	1.92012e+06		36219	332653
Q9Z0R4	Intersectin-1 OS=Mus musculus OX=10090 GN=Itsn1 PE=1 SV=2	194.2	166742	1.72498e+06	2.49706e+06	7.06253e+06	5.20091e+06	3.96886e+06	211036	211787	355395	2.44603e+06	1.31809e+06	1.30446e+06
O09159	Lysosomal alpha-mannosidase OS=Mus musculus OX=10090 GN=Man2b1 PE=1 SV=4	114.6	1.37899e+06	2.65469e+06	1.98503e+06	2.65622e+06	2.14021e+06	3.0998e+06	180430	144754		359154	321342
Q9WVM3	Anaphase-promoting complex subunit 7 OS=Mus musculus OX=10090 GN=Anapc7 PE=1 SV=3	63	593923	495096					3.46005e+06	2.05162e+06	1.11953e+06	255104	134285	363812
Q8BGH4	Receptor expression-enhancing protein 1 OS=Mus musculus OX=10090 GN=Reep1 PE=1 SV=1	22.3				326181			208478	173252	279543	1.21341e+06	912609	737822
Q03249	Galactose-1-phosphate uridylyltransferase OS=Mus musculus OX=10090 GN=Galt PE=1 SV=3	43.2							187578		221642	327851	115735	92292.8
P83877	Thioredoxin-like protein 4A OS=Mus musculus OX=10090 GN=Txnl4a PE=1 SV=1	16.8	411846	639902	64194	200377	300510		383478	899289		112953	236848
Q3TX08	tRNA (guanine(26)-N(2))-dimethyltransferase OS=Mus musculus OX=10090 GN=Trmt1 PE=1 SV=2	72.3	468110	1.89998e+06	674522	181368	75032.9	191459	2.87245e+06	2.15604e+06	1.87858e+06	409904	384650	376151
Q3V0C5	Ubiquitin carboxyl-terminal hydrolase 48 OS=Mus musculus OX=10090 GN=Usp48 PE=1 SV=2	120.6	377951	368704	378538				5.83712e+06	9.43929e+06	6.57564e+06	424845	120040	562456
Q9CZ62	Centrosomal protein of 97 kDa OS=Mus musculus OX=10090 GN=Cep97 PE=1 SV=1	94.6									89526.9	67850.2		198341
Q8CDA1	Phosphatidylinositide phosphatase SAC2 OS=Mus musculus OX=10090 GN=Inpp5f PE=1 SV=1	127.5							863383		108573		2.42098e+06	201722
P54763	Ephrin type-B receptor 2 OS=Mus musculus OX=10090 GN=Ephb2 PE=1 SV=3	109.8	402588	190136	60600.3	2.73537e+06	270473	365783				219638		168731
P15209	BDNF/NT-3 growth factors receptor OS=Mus musculus OX=10090 GN=Ntrk2 PE=1 SV=1	92.1										219897
Q9DB25	Dolichyl-phosphate beta-glucosyltransferase OS=Mus musculus OX=10090 GN=Alg5 PE=1 SV=1	36.8	635261	263560	2.6237e+06	635994	217545	615595
Q80YQ8	E3 ubiquitin-protein ligase RMND5A OS=Mus musculus OX=10090 GN=Rmnd5a PE=1 SV=2	44	68308.8	95778	100418	141109	104061	106944	137055	254407	100063	249737	274936	133759
Q9EPJ9	ADP-ribosylation factor GTPase-activating protein 1 OS=Mus musculus OX=10090 GN=Arfgap1 PE=1 SV=2	45.3							840213	118763	739353	905305	671075	352561
Q9ERT9	Protein phosphatase 1 regulatory subunit 1A OS=Mus musculus OX=10090 GN=Ppp1r1a PE=1 SV=1	18.7	193840	114239	58557.7	301202	532980	1.8159e+06				341451		492380
Q9JK48	Endophilin-B1 OS=Mus musculus OX=10090 GN=Sh3glb1 PE=1 SV=1	40.8	342736	798528	311121	1.86699e+06	1.85486e+06	891055	306774	393487	406089	1.48575e+06	1.0297e+06	1.22214e+06
Q3TYA6	M-phase phosphoprotein 8 OS=Mus musculus OX=10090 GN=Mphosph8 PE=1 SV=1	97.4	284268	324476	163324			221668	2.89635e+06	3.07869e+06	993997	361843	140209	573279
Q8C167	Prolyl endopeptidase-like OS=Mus musculus OX=10090 GN=Prepl PE=1 SV=1	83.1	214052	167382	235403	1.48715e+06	1.09651e+06	528646	293549	1.16265e+06	268674	3.45549e+06	2.26966e+06	1.23728e+06
Q8VCB1	Nucleoporin NDC1 OS=Mus musculus OX=10090 GN=Ndc1 PE=1 SV=1	75.4	119712	155239	62170.2				4.41317e+06	2.2072e+06	4.11149e+06	997752	183015	672438
Q8BIV3	Ran-binding protein 6 OS=Mus musculus OX=10090 GN=Ranbp6 PE=1 SV=3	124.5			128303
Q14C51	Pentatricopeptide repeat domain-containing protein 3, mitochondrial OS=Mus musculus OX=10090 GN=Ptcd3 PE=1 SV=2	77.7	1.7078e+06	1.96932e+06	1.81631e+06	775745	296961		6.31156e+06	1.08114e+07	6.51371e+06	621775	762100	437947
Q9WTX8	Mitotic spindle assembly checkpoint protein MAD1 OS=Mus musculus OX=10090 GN=Mad1l1 PE=1 SV=1	83.5	634965	48589.5	75921				1.67188e+06	1.19699e+06	169032		70790	385309
Q8R332	Nucleoporin p58/p45 OS=Mus musculus OX=10090 GN=Nup58 PE=1 SV=1	59.4	171361	594818	66501.8	112206	132996	105978	2.16558e+06	2.12046e+06	703577	2.66926e+06	817999	331949
Q62383	Transcription elongation factor SPT6 OS=Mus musculus OX=10090 GN=Supt6h PE=1 SV=2	199	1.55607e+06	522932	539807				9.96471e+06	9.54042e+06	9.47827e+06		985549	451476
P28658	Ataxin-10 OS=Mus musculus OX=10090 GN=Atxn10 PE=1 SV=2	53.7	2.69022e+07	2.29559e+07	2.07884e+07	2.20977e+07	2.04565e+07	2.2061e+07	4.45797e+07	4.94309e+07	4.13776e+07	4.96947e+07	3.81863e+07	3.5516e+07
Q9CPU4	Microsomal glutathione S-transferase 3 OS=Mus musculus OX=10090 GN=Mgst3 PE=1 SV=1	16.9	563615	599259	591381				1.73853e+06	1.70908e+06	1.03603e+06			312384
Q91YR7	Pre-mRNA-processing factor 6 OS=Mus musculus OX=10090 GN=Prpf6 PE=1 SV=1	106.7			9233532				5.5421e+06	3.84328e+06	1619019	211241	1.05856e+06	512043
Q922R1	UPF0183 protein C16orf70 homolog OS=Mus musculus OX=10090 PE=1 SV=2	47.4	4.89755e+06	223226	1.29734e+06	214240	527859	74568.4	1.57479e+06	1.48527e+06	1.65385e+06	344630	389611	158795
Q6PA06	Atlastin-2 OS=Mus musculus OX=10090 GN=Atl2 PE=1 SV=1	66.2	6.88986e+06	9658979	516396	1.89715e+06	1.64466e+06	844716	5.77678e+06	4.91829e+06	4.01617e+06	2.26623e+06	2.0454e+06	1.69045e+06
Q9D8Z6	Autophagy-related protein 101 OS=Mus musculus OX=10090 GN=Atg101 PE=1 SV=1	25									104946		891827
Q2NL51	Glycogen synthase kinase-3 alpha OS=Mus musculus OX=10090 GN=Gsk3a PE=1 SV=2	51.6	81195.5	18488272	13026707	2.10188e+06	1.53235e+06	1.41283e+06	1.94746e+06	2.45515e+06	2.0833e+06	2.07021e+06	854803	1.15391e+06
Q6VNB8	WD repeat and FYVE domain-containing protein 3 OS=Mus musculus OX=10090 GN=Wdfy3 PE=1 SV=1	392.1	341531	290727	332681	1.158e+06	213032	469384	686814	220889	208720	1.14691e+06	162967	513478
P49442	Inositol polyphosphate 1-phosphatase OS=Mus musculus OX=10090 GN=Inpp1 PE=1 SV=2	43.3				154279	95526.2	122316			117705	421703	435364	502713
P32261	Antithrombin-III OS=Mus musculus OX=10090 GN=Serpinc1 PE=1 SV=1	52	1.36445e+06	945067	738682	764219	237817	948359	515089	319716	677317	290055	147100	401544
Q921C5	Protein bicaudal D homolog 2 OS=Mus musculus OX=10090 GN=Bicd2 PE=1 SV=1	93.3							103624	60007.5	125035	101363	59985.4	370133
O35551	Rab GTPase-binding effector protein 1 OS=Mus musculus OX=10090 GN=Rabep1 PE=1 SV=2	99.5	170959	161510	172416	1.22891e+06	817489	993119	32556	32848.4	210102	320141	355172	344505
Q8JZQ2	AFG3-like protein 2 OS=Mus musculus OX=10090 GN=Afg3l2 PE=1 SV=1	89.5	85734.3		60633.3				1.0482e+06	789023	430976	141677	440987	263631
Q8BHC9	Alpha-(1,3)-fucosyltransferase 11 OS=Mus musculus OX=10090 GN=Fut11 PE=1 SV=1	55.5							88220.9	91577.4		69343.6	61634.5	88184.5
P46938	Transcriptional coactivator YAP1 OS=Mus musculus OX=10090 GN=Yap1 PE=1 SV=2	52.4	50691.8	167732	90558.8	74888.9			1.8647e+06	2.74271e+06	2.21325e+06	342128	582017	895014
Q9D3U0	Putative tRNA pseudouridine synthase Pus10 OS=Mus musculus OX=10090 GN=Pus10 PE=1 SV=1	59.7		84377.6		185381	104782	187972	419719	224569	475722	3055106	2365019	2.03323e+06
O35684	Neuroserpin OS=Mus musculus OX=10090 GN=Serpini1 PE=1 SV=1	46.3			400573	643848	228987	194227		90707.7	138689	2.58711e+06	339429	160346
Q80UP5	Ankyrin repeat domain-containing protein 13A OS=Mus musculus OX=10090 GN=Ankrd13a PE=1 SV=2	67.1	1.39232e+06	1.38139e+06	1.10192e+06	426839	401967	697394	1.07945e+06	1.24285e+06	1.22467e+06	1.60076e+06	119733	365065
Q0VGB7	Serine/threonine-protein phosphatase 4 regulatory subunit 2 OS=Mus musculus OX=10090 GN=Ppp4r2 PE=1 SV=1	46.5	1.89588e+06	2.08963e+06	2.14732e+06	996012	1.07985e+06	1.66088e+06	2.65814e+06	2.69524e+06	4.70077e+06	1.51972e+06	1.19552e+06	2.89112e+06
P09021	Homeobox protein Hox-A5 OS=Mus musculus OX=10090 GN=Hoxa5 PE=1 SV=1	29.2										81232.1	21300.6
Q8K1C9	Leucine-rich repeat-containing protein 41 OS=Mus musculus OX=10090 GN=Lrrc41 PE=1 SV=3	88.1							60460.3	86421.4	160771	327288		279093
Q9JJL8	Serine--tRNA ligase, mitochondrial OS=Mus musculus OX=10090 GN=Sars2 PE=1 SV=2	58.3	46863.8	58409.6	77074	85112.5	121464	101180	351748	401571	569530	1.1545e+06	548926	454616
Q6PAK3	Protein arginine N-methyltransferase 8 OS=Mus musculus OX=10090 GN=Prmt8 PE=1 SV=2	45.2	2.8178e+06	2.26744e+06	4.04176e+06	2.33146e+06	990380	4.26034e+06
Q64331	Unconventional myosin-VI OS=Mus musculus OX=10090 GN=Myo6 PE=1 SV=1	146.3	32492.8	62946.9		1.26378e+06	507412	790307		42377.5		1.25345e+06	455417	570978
Q91Z67	SLIT-ROBO Rho GTPase-activating protein 2 OS=Mus musculus OX=10090 GN=Srgap2 PE=1 SV=2	120.7	723690	348160	237100	741529	414953	809623	792050	646498	614034	1.31566e+06	757110	894630
Q8CI71	Syndetin OS=Mus musculus OX=10090 GN=Vps50 PE=1 SV=2	111.1							99969.6	83354.6	325134	187682	161727	189238
Q8VEL9	GTP-binding protein REM 2 OS=Mus musculus OX=10090 GN=Rem2 PE=1 SV=2	37.3	59714.6			328111	819466	261265			27444.6	384753	518637	637355
Q61686	Chromobox protein homolog 5 OS=Mus musculus OX=10090 GN=Cbx5 PE=1 SV=1	22.2	1.02982e+06	854302	654675	204320	886130	799346
P51175	Protoporphyrinogen oxidase OS=Mus musculus OX=10090 GN=Ppox PE=1 SV=1	50.8				341825	89612.8			507765		266205	333062	505086
O09111	NADH dehydrogenase [ubiquinone] 1 beta subcomplex subunit 11, mitochondrial OS=Mus musculus OX=10090 GN=Ndufb11 PE=1 SV=2	17.4	1.9463e+06	76031.8	220417	36657.7	36066.2		719564	602088	685487	54689.1	32493	57247.7
Q8BGW1	Alpha-ketoglutarate-dependent dioxygenase FTO OS=Mus musculus OX=10090 GN=Fto PE=1 SV=1	58	165446	831129	403978	486384	968968	918499	3.41423e+06	3.9924e+06	3.22701e+06	7.40189e+06	7.04113e+06	4.07386e+06
P62077	Mitochondrial import inner membrane translocase subunit Tim8 B OS=Mus musculus OX=10090 GN=Timm8b PE=1 SV=1	9.3	1.52767e+06	1.21034e+06	1.82542e+06	305438	660165	850416	2.02136e+06	2.05603e+06	1.63606e+06	786498	432474	625891
Q8VE62	Polyadenylate-binding protein-interacting protein 1 OS=Mus musculus OX=10090 GN=Paip1 PE=1 SV=1	45.7	1.24663e+06	1.25238e+06	1057991	7.3318e+06	9.40866e+06	6.75416e+06	890396	747260	840544	5.44137e+06	3.78782e+06	4.66515e+06
Q6PAC3	DDB1- and CUL4-associated factor 13 OS=Mus musculus OX=10090 GN=Dcaf13 PE=2 SV=2	51.4									76491.6	79495.7		75396.1
Q9Z1B3	1-phosphatidylinositol 4,5-bisphosphate phosphodiesterase beta-1 OS=Mus musculus OX=10090 GN=Plcb1 PE=1 SV=2	138.3	238056	421476		3.88229e+06	427632	849975	335590		400725	3.17806e+06	1184889	705552
P11157	Ribonucleoside-diphosphate reductase subunit M2 OS=Mus musculus OX=10090 GN=Rrm2 PE=1 SV=1	45.1	130861	147427	211601				2.96463e+07	3.42656e+07	3.24385e+07	2.12296e+06	2.91853e+06	2.31774e+06
Q6A009	E3 ubiquitin-protein ligase listerin OS=Mus musculus OX=10090 GN=Ltn1 PE=1 SV=3	198.8	2.77088e+06	1.52911e+07	1.45395e+06	603693	1.11092e+06	865574	2.86886e+08	4.06987e+08	5.02134e+08	8.35819e+07	6.00944e+07	6.58478e+07
P43406	Integrin alpha-V OS=Mus musculus OX=10090 GN=Itgav PE=1 SV=2	115.3												66128.3
Q9Z0M5	Lysosomal acid lipase/cholesteryl ester hydrolase OS=Mus musculus OX=10090 GN=Lipa PE=1 SV=2	45.3	736753			855334	1.55831e+06	888176	92198.8	63864.7		569540	1.86073e+06	871598
Q6WVG3	BTB/POZ domain-containing protein KCTD12 OS=Mus musculus OX=10090 GN=Kctd12 PE=1 SV=1	35.9	177316	295379		8.66786e+06	1.11917e+07	9.66842e+06			256184	5.31686e+06	4.15694e+06	6.29459e+06
Q8BGZ2	Protein FAM168A OS=Mus musculus OX=10090 GN=Fam168a PE=1 SV=1	26.2							56394.7	83384.5	156433	362231	271582
P52624	Uridine phosphorylase 1 OS=Mus musculus OX=10090 GN=Upp1 PE=1 SV=2	34.1	3.86322e+07	4.04205e+07	3.28423e+07	3.66841e+06	565269	556660	5.90744e+07	5.45636e+07	4.89308e+07	1.08912e+06	1.28896e+06	1.44893e+06
Q3TBW2	39S ribosomal protein L10, mitochondrial OS=Mus musculus OX=10090 GN=Mrpl10 PE=1 SV=2	29.4		246046	1.5317e+06				3.023e+06	2.29994e+06	1.64454e+06		507709	903160
Q8K284	General transcription factor 3C polypeptide 1 OS=Mus musculus OX=10090 GN=Gtf3c1 PE=1 SV=2	237.3							179987	151645		117318	599195
Q64332	Synapsin-2 OS=Mus musculus OX=10090 GN=Syn2 PE=1 SV=2	63.3							1.31278e+06	1.97809e+06	1.17799e+06	4.78727e+06	1.16468e+06	983497
Q9JJU8	SH3 domain-binding glutamic acid-rich-like protein OS=Mus musculus OX=10090 GN=Sh3bgrl PE=1 SV=1	12.8	237912	1.3654e+06	335306	2.97224e+07	2.68421e+07	2.63766e+07	77725.1	945457	367441	1.44082e+07	1.25435e+07	1.55577e+07
Q9WV03	Protein FAM50A OS=Mus musculus OX=10090 GN=Fam50a PE=1 SV=1	40.2	72637.4	168046	241466			443243	1.54721e+06	1.62517e+06	1.31617e+06	315074	361742	489296
Q64516	Glycerol kinase OS=Mus musculus OX=10090 GN=Gk PE=1 SV=2	61.2		103735
B9EJR8	Dynein assembly factor 5, axonemal OS=Mus musculus OX=10090 GN=Dnaaf5 PE=1 SV=1	93.8	1.45479e+06	1.76928e+06	2.10644e+06	175663	1.64573e+06		1.35877e+07	1.12935e+07	1.31747e+07	1.21005e+06	2.24654e+06	272055
Q5U458	DnaJ homolog subfamily C member 11 OS=Mus musculus OX=10090 GN=Dnajc11 PE=1 SV=2	63.2	1.28458e+06	2.24832e+06	1.0557e+06	1.09662e+06	1.14305e+06	312138	7.87397e+06	7.26385e+06	4.39488e+06	5.05933e+06	1.13821e+06	2.95815e+06
Q6PJN8	DALR anticodon-binding domain-containing protein 3 OS=Mus musculus OX=10090 GN=Dalrd3 PE=2 SV=1	58.7		278846	367227	248343		143201
Q8K1N4	Spermatogenesis-associated serine-rich protein 2 OS=Mus musculus OX=10090 GN=Spats2 PE=1 SV=1	58.9	124419	188989	106687		91940.8	54869.3	481663	665321	492926	90435.9	78873.2	360268
Q7TSZ8	Nucleus accumbens-associated protein 1 OS=Mus musculus OX=10090 GN=Nacc1 PE=1 SV=1	56.5	531558	605012	459266	102336	496304	116443	4.6021e+06	3.29539e+06	2.42659e+06	1.12869e+06	908663	728923
Q91ZM2	SH2B adapter protein 1 OS=Mus musculus OX=10090 GN=Sh2b1 PE=1 SV=2	79.6			53590.4			230363	152430		110418	598094		210449
Q6P4S8	Integrator complex subunit 1 OS=Mus musculus OX=10090 GN=Ints1 PE=1 SV=2	245	163472						3.10616e+06	2.85471e+06	670674	1.32715e+06	1.04914e+06	460563
O88809	Neuronal migration protein doublecortin OS=Mus musculus OX=10090 GN=Dcx PE=1 SV=1	40.6	214345	780672	313041	7.40168e+07	2.75918e+07	2.74834e+07	207564	836926	500824	6.59549e+07	2.65211e+07	2.62484e+07
Q8CHI8	E1A-binding protein p400 OS=Mus musculus OX=10090 GN=Ep400 PE=1 SV=3	337		445658	710838			49849.7	671344	1.3679e+06	1.75146e+06		174629	1.29684e+06
Q8JZM7	Parafibromin OS=Mus musculus OX=10090 GN=Cdc73 PE=1 SV=1	60.5	411562	152742	83362.1			138095	9.1866e+06	8.0665e+06	5.48201e+06	2.27611e+06	1.09642e+06	471902
Q80U49	Centrosomal protein of 170 kDa protein B OS=Mus musculus OX=10090 GN=Cep170b PE=1 SV=2	170.7									41988.3	62769.6		30294.4
Q9CYC6	m7GpppN-mRNA hydrolase OS=Mus musculus OX=10090 GN=Dcp2 PE=1 SV=2	48.3							717268	626761	207903	678280	911880	281249
Q62315	Protein Jumonji OS=Mus musculus OX=10090 GN=Jarid2 PE=1 SV=1	137.4	32812.9		34145.8			13347.3	5.22491e+06	4.00104e+06	237894	1.30343e+06	1.07054e+06	430729
Q8VCB2	Mediator of RNA polymerase II transcription subunit 25 OS=Mus musculus OX=10090 GN=Med25 PE=1 SV=1	78.1	9.0969e+06	1.26071e+07	738877	1.63028e+06	1.11554e+06	2.04545e+06	5.62374e+06	6.29912e+06	3.432e+06	1.15074e+06	2.09982e+06	1.00913e+06
Q3UHU5	Microtubule cross-linking factor 1 OS=Mus musculus OX=10090 GN=Mtcl1 PE=1 SV=1	213.7			298474				253783		121642	184905
P60840	Alpha-endosulfine OS=Mus musculus OX=10090 GN=Ensa PE=1 SV=1	13.3							41532.6	20599	199663	135460		166987
Q9WUA6	RAC-gamma serine/threonine-protein kinase OS=Mus musculus OX=10090 GN=Akt3 PE=1 SV=1	55.7			124402	1.32853e+06	703443	830347				991805	417114	517425
Q99PJ0	Neurotrimin OS=Mus musculus OX=10090 GN=Ntm PE=1 SV=2	38				257221		38739.5				194081	233834
Q9CPS8	Small membrane A-kinase anchor protein OS=Mus musculus OX=10090 PE=1 SV=1	11.9	150206	109644	75524.3		198845	76876.1		82676.3	78568.5			79745.9
P60904	DnaJ homolog subfamily C member 5 OS=Mus musculus OX=10090 GN=Dnajc5 PE=1 SV=1	22.1	216058	227068	461740	2.06257e+06	314093	1.28315e+06	249583	278742	349565	1.09826e+06	619905	581582
Q03137	Ephrin type-A receptor 4 OS=Mus musculus OX=10090 GN=Epha4 PE=1 SV=2	109.7							158356	258779	403978	492779	201851	267616
Q91X97	Neurocalcin-delta OS=Mus musculus OX=10090 GN=Ncald PE=1 SV=4	22.2			113952	1.94488e+06	1.24575e+06	1.14502e+06				1.84609e+06	488233	917828
Q8VEH5	EPM2A-interacting protein 1 OS=Mus musculus OX=10090 GN=Epm2aip1 PE=1 SV=1	70.1	154390	92914.9	1.30128e+06	2.44265e+06	2.84788e+06	1.26044e+06	529503	352707	947812	4.92349e+06	3.17218e+06	2.32878e+06
P97429	Annexin A4 OS=Mus musculus OX=10090 GN=Anxa4 PE=1 SV=4	35.9	19509522	721825	3.5012e+06		7.14269e+06	473699	5.85682e+06	4.52968e+06	6.13979e+06	768142	173162	627030
S4R1M9	Oxysterol-binding protein-related protein 10 OS=Mus musculus OX=10090 GN=Osbpl10 PE=1 SV=1	83.8	62775.3	86466.1							131031
P48722	Heat shock 70 kDa protein 4L OS=Mus musculus OX=10090 GN=Hspa4l PE=1 SV=2	94.3	132546	126078	249655	1.23805e+07	1.3795e+07	1.42789e+07		76566.9	155364	4.33589e+06	3.3286e+06	4.01996e+06
Q91ZP9	N-terminal EF-hand calcium-binding protein 2 OS=Mus musculus OX=10090 GN=Necab2 PE=1 SV=1	43.4	665768	995559	1.7988e+06	3.95926e+06	4497448	3.71955e+06	227222	303218			2.95898e+06	652431
Q9Z210	Peroxisomal membrane protein 11B OS=Mus musculus OX=10090 GN=Pex11b PE=1 SV=1	28.7							389009	309506	324397	637000	324511	261542
Q8K2C7	Protein OS-9 OS=Mus musculus OX=10090 GN=Os9 PE=1 SV=2	76.1			24781.9	233645	171829		80420.9	100999	209254	597117	601755	426316
G3X9K3	Brefeldin A-inhibited guanine nucleotide-exchange protein 1 OS=Mus musculus OX=10090 GN=Arfgef1 PE=1 SV=1	208.4								188453	257839		1.10819e+06	101930
Q9Z2C9	Myotubularin-related protein 7 OS=Mus musculus OX=10090 GN=Mtmr7 PE=1 SV=2	75.6							101000	54356.7	83351.7	151143		362313
Q69ZW3	EH domain-binding protein 1 OS=Mus musculus OX=10090 GN=Ehbp1 PE=1 SV=3	139				505957	324865	103051				490111	444981	244334
Q6WKZ8	E3 ubiquitin-protein ligase UBR2 OS=Mus musculus OX=10090 GN=Ubr2 PE=1 SV=2	199	823043	168686		17286	37577.7		2.9572e+06	3.28944e+06	3.14038e+06	561130	161607	1.07521e+06
P10649	Glutathione S-transferase Mu 1 OS=Mus musculus OX=10090 GN=Gstm1 PE=1 SV=2	26	989818	8.03939e+06	1.25143e+06	3.76285e+06	6.96651e+06	9.1891e+06	3.85998e+06	2.43909e+06	1.93042e+06	5.33843e+06	6.49662e+06	4.94784e+06
P20664	DNA primase small subunit OS=Mus musculus OX=10090 GN=Prim1 PE=1 SV=1	49.3	292858	555151	83725.7		79612.8		4.61704e+06	3.9888e+06	5.49134e+06	371039	503817	237542
O55128	Histone deacetylase complex subunit SAP18 OS=Mus musculus OX=10090 GN=Sap18 PE=1 SV=1	17.6	294007	268530	180861				1.24384e+06	1.01138e+06
Q9D024	Coiled-coil domain-containing protein 47 OS=Mus musculus OX=10090 GN=Ccdc47 PE=1 SV=2	55.8	375086	341216	371253	491361	307919	322139	351836	1.78086e+06	494735	496572	646325	380574
P57716	Nicastrin OS=Mus musculus OX=10090 GN=Ncstn PE=1 SV=3	78.4							167029					354017
O88396	GrpE protein homolog 2, mitochondrial OS=Mus musculus OX=10090 GN=Grpel2 PE=2 SV=2	25	780793	850792	101939	286499	1.1161e+06	310404	149590	257357		193742	194139
P10107	Annexin A1 OS=Mus musculus OX=10090 GN=Anxa1 PE=1 SV=2	38.7			172467	78963.8		294590			174911	189993		240880
Q9D0R9	WD repeat-containing protein 89 OS=Mus musculus OX=10090 GN=Wdr89 PE=2 SV=1	42.4	96766.5	95734.5	162232				272350	403495
Q8VID5	ATP-dependent DNA helicase Q5 OS=Mus musculus OX=10090 GN=Recql5 PE=1 SV=1	108.2		412345	241045	210470			889115	1.09084e+06		159233	128764
Q9D7W5	Mediator of RNA polymerase II transcription subunit 8 OS=Mus musculus OX=10090 GN=Med8 PE=1 SV=1	29.2	144009	80492.8		86618.7		33828.6			207133			111120
Q91VW5	Golgin subfamily A member 4 OS=Mus musculus OX=10090 GN=Golga4 PE=1 SV=2	257.4							90821.3	66571.1	117593	131058	70031.3	101986
Q5SSZ5	Tensin-3 OS=Mus musculus OX=10090 GN=Tns3 PE=1 SV=1	155.5	139051	203011	219754				1.49152e+07	3.13228e+07	1.63591e+07	1.34492e+06	928351	1.29339e+06
Q6NV83	U2 snRNP-associated SURP motif-containing protein OS=Mus musculus OX=10090 GN=U2surp PE=1 SV=3	118.2	2.30393e+06	2.16449e+06	187221	115480	371851	574976	8.17073e+06	8.4526e+06	639738	653492	874022	720226
P59242	Cingulin OS=Mus musculus OX=10090 GN=Cgn PE=1 SV=1	136.4							95688.2	236623	312110	155630	154925	420226
Q9CQD4	Charged multivesicular body protein 1b-2 OS=Mus musculus OX=10090 GN=Chmp1b2 PE=2 SV=2	22.1				112262		365937		80860.4	78013.8	369861	325836	265553
Q9CZT4	DNA-directed RNA polymerase III subunit RPC5 OS=Mus musculus OX=10090 GN=Polr3e PE=1 SV=2	79.8							519105	407006	436330	702886	381486	423753
O35317	Pre-B-cell leukemia transcription factor 3 OS=Mus musculus OX=10090 GN=Pbx3 PE=2 SV=1	47.2				436176		463912	193211	210642		815737	732870	1.17322e+06
Q9CZC8	Secernin-1 OS=Mus musculus OX=10090 GN=Scrn1 PE=1 SV=1	46.3	476111	343113	604190	2.08913e+07	1.8999e+07	1.94415e+07	267951	685339	363200	3.44783e+07	5.66301e+06	8.8467e+06
Q9CR61	NADH dehydrogenase [ubiquinone] 1 beta subcomplex subunit 7 OS=Mus musculus OX=10090 GN=Ndufb7 PE=1 SV=3	16.3	255461	240867	201360	148368		54363.9	1.44146e+06	1.82164e+06	1.19208e+06	1.20416e+06	756766
P39053	Dynamin-1 OS=Mus musculus OX=10090 GN=Dnm1 PE=1 SV=2	97.7	556488	2.36409e+06	1.715e+06	1.37112e+07	4.52133e+06	3.79815e+06	1.19582e+06	1.32187e+06	966301	1.17529e+07	1.28831e+06	3.41867e+06
P08551	Neurofilament light polypeptide OS=Mus musculus OX=10090 GN=Nefl PE=1 SV=5	61.5	262969	277010	457436	2.33813e+06	1.82836e+06	2.45676e+06	56334.1	92089.4	60956.4	311643	209210	487405
P70206	Plexin-A1 OS=Mus musculus OX=10090 GN=Plxna1 PE=1 SV=1	211	33104.2		35753.7	1.01014e+06	532650	612608	885047			1.68675e+06	1.20336e+06	1.03483e+06
P69566	Ran-binding protein 9 OS=Mus musculus OX=10090 GN=Ranbp9 PE=1 SV=1	71	98789.7	128797		98995.1	139360		615745	597293	667514	512353	590484	393574
Q8BVD5	MAGUK p55 subfamily member 7 OS=Mus musculus OX=10090 GN=Mpp7 PE=1 SV=2	65.5							290716	324365		179470	75638.5	107944
Q8VCE2	GPN-loop GTPase 1 OS=Mus musculus OX=10090 GN=Gpn1 PE=1 SV=1	41.6	94057.7	89653.3		186795			1.83502e+06	2.46937e+06	2.59942e+06	1.36187e+06	1.24719e+06	1.14252e+06
Q60900	ELAV-like protein 3 OS=Mus musculus OX=10090 GN=Elavl3 PE=1 SV=1	39.5				876064	489955	650556				1.1087e+06	645547	882622
Q9D1B9	39S ribosomal protein L28, mitochondrial OS=Mus musculus OX=10090 GN=Mrpl28 PE=1 SV=3	30.2	862497	316457	342077				424097	786445	534351
Q9EP97	Sentrin-specific protease 3 OS=Mus musculus OX=10090 GN=Senp3 PE=1 SV=1	64.4	938277	315565	144472			263276	7.66935e+06	8.12476e+06	4.24444e+06	264585	736570	586265
P63328	Serine/threonine-protein phosphatase 2B catalytic subunit alpha isoform OS=Mus musculus OX=10090 GN=Ppp3ca PE=1 SV=1	58.6	884201	906435	388687	1.65293e+07	1.02455e+07	8.41252e+06	645627	510072	307091	7.92783e+06	3.82032e+06	4.51275e+06
Q9DCH6	AN1-type zinc finger protein 6 OS=Mus musculus OX=10090 GN=Zfand6 PE=1 SV=1	24							374517	342904	361962	279851	646405	303928
Q6DFV5	Probable helicase with zinc finger domain OS=Mus musculus OX=10090 GN=Helz PE=1 SV=2	219.7	2.16298e+06	2.36923e+06	286735		206353	298987	828951	399110	689868	354130
Q8VHI3	GDP-fucose protein O-fucosyltransferase 2 OS=Mus musculus OX=10090 GN=Pofut2 PE=1 SV=1	49.4	738781	564875	853329	2.7442e+06	2.61096e+06	2.71502e+06	1.54547e+06	285565	303919	1.35039e+06	1.26037e+06	1.26369e+06
P60469	Liprin-alpha-3 OS=Mus musculus OX=10090 GN=Ppfia3 PE=1 SV=2	133.3	53404.2	78071.2	17218.5	231901	44115.8	276247	184719	154799	150930	399785	403590	306546
Q8CII2	Cell division cycle protein 123 homolog OS=Mus musculus OX=10090 GN=Cdc123 PE=1 SV=2	38.8	525649						1.63765e+06	1.77283e+06	1.38276e+06	300329	716841	394425
Q8BWY9	Protein CIP2A OS=Mus musculus OX=10090 GN=Cip2a PE=1 SV=3	102	900929	372401	1.01419e+06	895257			6.95653e+06	6.50189e+06	6.87569e+06	490091	434752	237339
Q9D164	FXYD domain-containing ion transport regulator 6 OS=Mus musculus OX=10090 GN=Fxyd6 PE=1 SV=2	10.4	418471	532035	371881			130011	784608	901785	793558	440103
P06797	Cathepsin L1 OS=Mus musculus OX=10090 GN=Ctsl PE=1 SV=2	37.5							583312	911691	512596	507225	818347	760546
Q6P9R4	Rho guanine nucleotide exchange factor 18 OS=Mus musculus OX=10090 GN=Arhgef18 PE=1 SV=3	155.9	13101.5			29047.4	61149.1	7645.74	119991	37824.8	8600.53	76545.5	118479	13919.2
Q6PHQ8	N-alpha-acetyltransferase 35, NatC auxiliary subunit OS=Mus musculus OX=10090 GN=Naa35 PE=1 SV=1	83.3	138890	127377	59124.4			132163	1.24617e+06	1.06486e+06	1.07245e+06	133865	170076	580705
P46096	Synaptotagmin-1 OS=Mus musculus OX=10090 GN=Syt1 PE=1 SV=1	47.4				845804	723587	208622				1.16926e+06	664857	341131
P97367	Homeobox protein Meis2 OS=Mus musculus OX=10090 GN=Meis2 PE=1 SV=2	51.7				363654	539055	458566				782829	584667	635011
Q6P6I6	DNA-directed RNA polymerase II subunit GRINL1A OS=Mus musculus OX=10090 GN=Polr2m PE=2 SV=2	41.2									71092.1	91595.4		26627.9
Q60760	Growth factor receptor-bound protein 10 OS=Mus musculus OX=10090 GN=Grb10 PE=1 SV=2	70.5	290882	130523	151012		477880	340313	5.79396e+06	5.78687e+06	8.25229e+06	3.84719e+06	3.06183e+06	3.16076e+06
O35218	Cleavage and polyadenylation specificity factor subunit 2 OS=Mus musculus OX=10090 GN=Cpsf2 PE=1 SV=1	88.3	1.90035e+06	1.69304e+06	2.13433e+06	180967	146921	2.0593e+06	3.12164e+06	3.51793e+06	1.339e+06	724125	100701	443347
Q8BH65	Protein DENND6A OS=Mus musculus OX=10090 GN=Dennd6a PE=1 SV=1	68.9							237287	211022	243340	240364	257033	167284
Q9QZL0	Receptor-interacting serine/threonine-protein kinase 3 OS=Mus musculus OX=10090 GN=Ripk3 PE=1 SV=2	53.3							216410	158707	195292	245432	228303	112272
Q8C4Y3	Negative elongation factor B OS=Mus musculus OX=10090 GN=Nelfb PE=1 SV=2	65.6	3.61965e+06	4.2849e+06	4.73891e+06	1.0102e+06	1.67931e+06	1.51777e+06	7.1535e+06	3.64379e+06	4.74735e+06	789642	1.17407e+06	1.2325e+06
O35127	Protein C10 OS=Mus musculus OX=10090 GN=Grcc10 PE=1 SV=1	13.2	196138	214215	162131	453273	631301	620506	3.65281e+06	3.81741e+06	3.07147e+06	6.87473e+06	6.4063e+06	6.67257e+06
Q80VC9	Calmodulin-regulated spectrin-associated protein 3 OS=Mus musculus OX=10090 GN=Camsap3 PE=1 SV=1	135.1	121371	165064	198327	158295	91216	93869.1	255282	262055	274583	170195	49692.3	192418
P97820	Mitogen-activated protein kinase kinase kinase kinase 4 OS=Mus musculus OX=10090 GN=Map4k4 PE=1 SV=1	140.5	811062	573939	905182	1.04956e+06	1.61414e+06	1.44768e+06	365581	904674	555298	873002	866452	362743
Q8CGC4	Protein LSM14 homolog B OS=Mus musculus OX=10090 GN=Lsm14b PE=1 SV=3	42.3							767532	905356	401788	917078	393462	584475
P11260	LINE-1 retrotransposable element ORF1 protein OS=Mus musculus OX=10090 GN=Lire1 PE=1 SV=2	41.2	189526	276394	435900				6.6112e+06	7.39369e+06	7.21379e+06	111805	596524	180651
Q8R1F9	Ribonuclease P protein subunit p40 OS=Mus musculus OX=10090 GN=Rpp40 PE=2 SV=2	41.5	2.76111e+06	886819	1.23049e+06				4.18222e+06	2.21192e+06	862382
Q80X85	28S ribosomal protein S7, mitochondrial OS=Mus musculus OX=10090 GN=Mrps7 PE=1 SV=1	28	178013	187343	1.34604e+06				1.56743e+06	1.86242e+06	1.85253e+06	639407
O55106	Striatin OS=Mus musculus OX=10090 GN=Strn PE=1 SV=2	85.9						11734977			165102	86896.5	148890	4.33047e+06
Q6NZL0	Protein SOGA3 OS=Mus musculus OX=10090 GN=Soga3 PE=1 SV=2	103.4	851942	698961	1.04346e+06	3.18731e+06	1.90792e+06	2.09437e+06	1.79642e+06	2.05067e+06	2.01998e+06	5.43698e+06	3.33569e+06	2.03938e+06
Q8BWW9	Serine/threonine-protein kinase N2 OS=Mus musculus OX=10090 GN=Pkn2 PE=1 SV=3	111.5			30406.4		59702.2	99958.9	256589	198807	406545	675635	425800	387380
Q9CXZ1	NADH dehydrogenase [ubiquinone] iron-sulfur protein 4, mitochondrial OS=Mus musculus OX=10090 GN=Ndufs4 PE=1 SV=3	19.8	340822	3.33063e+06	250458	642768		243129	4.20835e+06	4.63473e+06	2.79858e+06	1.01553e+06	287076	401267
Q02614	SAP30-binding protein OS=Mus musculus OX=10090 GN=Sap30bp PE=1 SV=2	33.8	874829	280357	394681		107931		346521	468311	267633
Q8K0F1	TBC1 domain family member 23 OS=Mus musculus OX=10090 GN=Tbc1d23 PE=1 SV=1	76.4					931523		70291	231249	89914.6	674509	1.38378e+06	87283.8
Q8VHJ5	Serine/threonine-protein kinase MARK1 OS=Mus musculus OX=10090 GN=Mark1 PE=1 SV=2	88.3		89329.1		101043		70672.3	183222			72562.8	72333	44815.9
Q62165	Dystroglycan OS=Mus musculus OX=10090 GN=Dag1 PE=1 SV=4	96.8							217920	331992	238486	187561	271222	283835
Q8BWF0	Succinate-semialdehyde dehydrogenase, mitochondrial OS=Mus musculus OX=10090 GN=Aldh5a1 PE=1 SV=1	55.9	467767	659450	476073	9.2597e+06	7.51246e+06	8.374e+06	38937.8	39524.7	58556.5	534509	458555	340405
Q8BRT1	CLIP-associating protein 2 OS=Mus musculus OX=10090 GN=Clasp2 PE=1 SV=1	140.7	1.14983e+06	969165	647654	6.64618e+06	3.92723e+06	2.60918e+06	1.79909e+06	1.05893e+06	2.89119e+06	8.20313e+06	4.40586e+06	3.2102e+06
Q9JIK5	Nucleolar RNA helicase 2 OS=Mus musculus OX=10090 GN=Ddx21 PE=1 SV=3	93.5	7.742e+06	4.68766e+06	3.52193e+06	2.62129e+06	1.44313e+06	1.06493e+06	2.3962e+07	3.09161e+07	8.93005e+06	2.71828e+06	4.02475e+06	4.23302e+06
O09012	Peroxisomal targeting signal 1 receptor OS=Mus musculus OX=10090 GN=Pex5 PE=1 SV=2	70.7							2.1042e+06	2.25588e+06	1.89328e+06	2.28204e+06	1.75417e+06	1.78e+06
P21619	Lamin-B2 OS=Mus musculus OX=10090 GN=Lmnb2 PE=1 SV=2	67.3	348287	115675		100217		90029.2	4.30424e+06	3.73623e+06		341566	1.67189e+06	35979.5
Q99ME9	Nucleolar GTP-binding protein 1 OS=Mus musculus OX=10090 GN=Gtpbp4 PE=1 SV=3	74.1	2.41413e+06	2.99243e+06	3.18645e+06	224474	244192	544589	4.89118e+06	5.30843e+06	3.01542e+06	197094	353856	317403
Q62059	Versican core protein OS=Mus musculus OX=10090 GN=Vcan PE=1 SV=2	366.6					151831	166027		104705	125706	165474	452668	392736
Q8BI84	Transport and Golgi organization protein 1 homolog OS=Mus musculus OX=10090 GN=Mia3 PE=1 SV=2	213.5		864340	4.09525e+06	299979	180232	207880	122985	148127	174303	204890		76266.2
Q9Z1W9	STE20/SPS1-related proline-alanine-rich protein kinase OS=Mus musculus OX=10090 GN=Stk39 PE=1 SV=1	60.3		611145	66801.4	4.63173e+06	5.5814e+06	4.98101e+06	168309			1.40827e+06	2.03013e+06	1.49645e+06
P13705	DNA mismatch repair protein Msh3 OS=Mus musculus OX=10090 GN=Msh3 PE=2 SV=3	123	119639	80322.2	100600	100019		274489	67523.1		45158			33930.9
Q8K0E1	BTB/POZ domain-containing protein KCTD15 OS=Mus musculus OX=10090 GN=Kctd15 PE=1 SV=1	31.9					80360.7	67250.9				58963.7	53247.5	49362.1
Q0KL02	Triple functional domain protein OS=Mus musculus OX=10090 GN=Trio PE=1 SV=3	347.6	88510.6	1.99485e+06	1.55194e+06	2.00382e+06	2.33928e+06	524024	1.13076e+06	1.22864e+06	1.30917e+06	1.66411e+06	1.73339e+06	1.1633e+06
Q6PAL7	AT-hook DNA-binding motif-containing protein 1 OS=Mus musculus OX=10090 GN=Ahdc1 PE=1 SV=1	168							1.25213e+06	899702	714259	984946	1.10252e+06	579654
Q9Z0G0	PDZ domain-containing protein GIPC1 OS=Mus musculus OX=10090 GN=Gipc1 PE=1 SV=1	36.1	443044	925531	282465	71155.7	1.06168e+06	714184	3267393	2.30725e+06	2.16177e+06	1.24275e+06	1.19807e+06	1.03177e+06
Q61330	Contactin-2 OS=Mus musculus OX=10090 GN=Cntn2 PE=1 SV=2	113.1							568741				1.12787e+06
A2BH40	AT-rich interactive domain-containing protein 1A OS=Mus musculus OX=10090 GN=Arid1a PE=1 SV=1	241.9	1.49066e+06	840632	521343	1.18459e+06	1.18461e+06	1.37192e+06	5.8644e+06	7.11847e+06	2.4964e+06	9.53308e+06	4.81409e+06	1.34341e+06
Q60715	Prolyl 4-hydroxylase subunit alpha-1 OS=Mus musculus OX=10090 GN=P4ha1 PE=1 SV=2	60.9	117333	1.02545e+06	240105	1.31779e+07	8.63261e+06	1.2011e+07	246242	288242	414886	5.67463e+06	7.17054e+06	6.81631e+06
P51880	Fatty acid-binding protein, brain OS=Mus musculus OX=10090 GN=Fabp7 PE=1 SV=2	14.9	585079	619288	171361	7.95423e+07	7.81442e+07	7.27741e+07	372353	95276.3	403353	2.77518e+07	2.58664e+07	2.80096e+07
P98203	Armadillo repeat protein deleted in velo-cardio-facial syndrome homolog OS=Mus musculus OX=10090 GN=Arvcf PE=1 SV=2	105	517920	658031		796487	841881			165417	491352	267342	304269
Q8BU11	TOX high mobility group box family member 4 OS=Mus musculus OX=10090 GN=Tox4 PE=1 SV=3	65.9							143550	113029	105418	97615.4	81924.9	163574
Q9D7B1	tRNA-dihydrouridine(20) synthase [NAD(P)+]-like OS=Mus musculus OX=10090 GN=Dus2 PE=1 SV=1	55.3							61113.1		136855	81761.3		125907
Q8BJH1	Zinc finger C2HC domain-containing protein 1A OS=Mus musculus OX=10090 GN=Zc2hc1a PE=1 SV=1	35.1	30982.9	33660.7	44978.5	775028	531180	526154	38672.7	50927.3	40553	550345	362110	353436
O35226	26S proteasome non-ATPase regulatory subunit 4 OS=Mus musculus OX=10090 GN=Psmd4 PE=1 SV=1	40.7	1.41432e+07	1.30854e+07	1.41022e+07	1.12147e+07	1.45562e+07	1.05495e+07	1.22203e+07	1.41913e+07	1.46196e+07	6.63045e+06	8.3489e+06	5.73975e+06
Q9JLB0	MAGUK p55 subfamily member 6 OS=Mus musculus OX=10090 GN=Mpp6 PE=1 SV=1	62.6	2.71979e+06	1.95372e+06	234297	364884	547462	230984	847775	932304	746217	983081		351475
Q6PF93	Phosphatidylinositol 3-kinase catalytic subunit type 3 OS=Mus musculus OX=10090 GN=Pik3c3 PE=1 SV=1	101.4	245112	224453	712286	277946	45574.6	134098	3.43352e+06	3.28243e+06	1.58695e+06	1.02726e+06	768987	185117
Q01065	Calcium/calmodulin-dependent 3',5'-cyclic nucleotide phosphodiesterase 1B OS=Mus musculus OX=10090 GN=Pde1b PE=1 SV=2	61.2		50169.5		773773	1.48032e+06	196583	249972			1.7003e+06	548798	930844
Q8BY87	Ubiquitin carboxyl-terminal hydrolase 47 OS=Mus musculus OX=10090 GN=Usp47 PE=1 SV=2	157.4	430454	872749	586591	3.10446e+06	3.75142e+06	2.11747e+06	2.05372e+06	2.36627e+06	2.47711e+06	7.66403e+06	4.96261e+06	6.58664e+06
Q60875	Rho guanine nucleotide exchange factor 2 OS=Mus musculus OX=10090 GN=Arhgef2 PE=1 SV=4	111.9	1.36133e+06	2.76211e+06	1.52345e+06	554952	367506	772204	6.50054e+06	7.36992e+06	5.17235e+06	640901	1.54737e+06	1.27734e+06
O88952	Protein lin-7 homolog C OS=Mus musculus OX=10090 GN=Lin7c PE=1 SV=2	21.8	1.28498e+06	1.17293e+06	1.6319e+06	3244458	2.98726e+06	2.80731e+06	1.77496e+06	1.93951e+06	1.57866e+06	2.71777e+06	1.86991e+06	2.16941e+06
O09000	Nuclear receptor coactivator 3 OS=Mus musculus OX=10090 GN=Ncoa3 PE=1 SV=2	151.5	52968.3	45622.2					990598	1.20143e+06	645404	79255.6	623372	529956
Q9QYB5	Gamma-adducin OS=Mus musculus OX=10090 GN=Add3 PE=1 SV=2	78.7	1.57595e+06		652546	920460	977087	298026	473915	418775	119327	1.02897e+06	120128	854393
Q9Z2S7	TSC22 domain family protein 3 OS=Mus musculus OX=10090 GN=Tsc22d3 PE=1 SV=2	15.2				288650		240054	58327.7			144556	152232	217012
Q80W47	WD repeat domain phosphoinositide-interacting protein 2 OS=Mus musculus OX=10090 GN=Wipi2 PE=1 SV=1	48.4	81618.5	103572	463471		1.53515e+06	601243	1.88665e+06	1.33644e+06	1.42526e+06	2770122	1.70825e+06	544127
Q8BIW9	Chromosome transmission fidelity protein 18 homolog OS=Mus musculus OX=10090 GN=Chtf18 PE=1 SV=2	108.1	848768	9.65226e+06	308908	939315	788977	260596	4.1402e+06	4.04406e+06	2.47373e+06	825548	992847	680236
P70444	BH3-interacting domain death agonist OS=Mus musculus OX=10090 GN=Bid PE=1 SV=2	21.9	1.97296e+06	1.91294e+06	1.94672e+06	48695.6	840482	824410	5.26232e+06	6.84323e+06	6.22525e+06	851116	424802	493387
O89001	Carboxypeptidase D OS=Mus musculus OX=10090 GN=Cpd PE=1 SV=2	152.3				1.48443e+06	1.11507e+06	273853				578875	1.34388e+06	675667
Q91WG8	Bifunctional UDP-N-acetylglucosamine 2-epimerase/N-acetylmannosamine kinase OS=Mus musculus OX=10090 GN=Gne PE=1 SV=1	79.1					673574		157211	145838	165817	406880	2.55682e+06	94230.1
Q9CQ45	Neudesin OS=Mus musculus OX=10090 GN=Nenf PE=1 SV=1	18.9	414557	359644	390498	1.71447e+06	655519	1.14534e+06						183670
Q8C8R3	Ankyrin-2 OS=Mus musculus OX=10090 GN=Ank2 PE=1 SV=2	426				509968	198630	716958				1.44625e+06	225674	307131
Q8VHE0	Translocation protein SEC63 homolog OS=Mus musculus OX=10090 GN=Sec63 PE=1 SV=4	87.8	787078	466597	447034	277809	927992	514044	886365	1.75265e+06	1.08215e+06	880725	864718	286617
Q91VS7	Microsomal glutathione S-transferase 1 OS=Mus musculus OX=10090 GN=Mgst1 PE=1 SV=3	17.5	90790.7			958248	461559	570637				618406	144401	434146
P62823	Ras-related protein Rab-3C OS=Mus musculus OX=10090 GN=Rab3c PE=1 SV=1	25.9				1228960	398131	596536			76226	2.27564e+06	887510	908750
P83510	Traf2 and NCK-interacting protein kinase OS=Mus musculus OX=10090 GN=Tnik PE=1 SV=2	150.3				44797.1	62138	53180.1				64131.6	39592.1	78089.8
Q9CWU9	Nucleoporin Nup37 OS=Mus musculus OX=10090 GN=Nup37 PE=1 SV=2	36.7	1.40664e+06	1.13008e+06	45203.1		85548.7		3.39205e+06	4466946	2.25758e+06	106217	113805	134198
P97304	DNA-directed RNA polymerases I and III subunit RPAC2 OS=Mus musculus OX=10090 GN=Polr1d PE=1 SV=1	15.1	575117	1.13434e+06	522870		537048	387357	2.78791e+06	2.98433e+06	1.67712e+06	322449	178261	370310
Q9CY45	EEF1A lysine methyltransferase 1 OS=Mus musculus OX=10090 GN=Eef1akmt1 PE=1 SV=1	24.5		5277127					670616	714152	665354	77715.2		344121
Q99JX7	Nuclear RNA export factor 1 OS=Mus musculus OX=10090 GN=Nxf1 PE=1 SV=3	70.3	1.97551e+06	2.13353e+06	1.1128e+06	123239	866663	484375	1.14058e+07	8.18133e+06	368748	287435	866182	232866
Q3TLH4	Protein PRRC2C OS=Mus musculus OX=10090 GN=Prrc2c PE=1 SV=3	310.7	4.30002e+06	6.08589e+06	4.67284e+06	3.64759e+06	5.50232e+06	2.88572e+06	1.03361e+07	1.19553e+07	1.23327e+07	4.91245e+06	4.27279e+06	5.2002e+06
O88532	Zinc finger RNA-binding protein OS=Mus musculus OX=10090 GN=Zfr PE=1 SV=2	116.8	326530	129974	404788			643118	1.01577e+06	651538	437987		109625	317077
Q8VDG7	Platelet-activating factor acetylhydrolase 2, cytoplasmic OS=Mus musculus OX=10090 GN=Pafah2 PE=1 SV=2	43.5									65064.4	78171.8
Q587J6	LINE-1 type transposase domain-containing protein 1 OS=Mus musculus OX=10090 GN=L1td1 PE=2 SV=1	88.1	2.52891e+06	2.438e+06	2.2087e+06	106902	230138		3.47429e+07	4.55967e+07	2.54597e+07	1.43648e+06	322944	297172
Q6P1G0	HEAT repeat-containing protein 6 OS=Mus musculus OX=10090 GN=Heatr6 PE=1 SV=1	128.8	126643	106957	74105.6		435920	210714		102611	54060.9	45665.7		37347.4
Q6P9P6	Kinesin-like protein KIF11 OS=Mus musculus OX=10090 GN=Kif11 PE=1 SV=1	118	2.3065e+06	1.41322e+06	2.56004e+06	419148	1.82053e+06	240213	2.79364e+07	2.76461e+07	2.95938e+07	3.8073e+06	5.75004e+06	3.37615e+06
Q6P549	Phosphatidylinositol 3,4,5-trisphosphate 5-phosphatase 2 OS=Mus musculus OX=10090 GN=Inppl1 PE=1 SV=1	138.9								320524	258670	269832	42490.9	82437.3
P35293	Ras-related protein Rab-18 OS=Mus musculus OX=10090 GN=Rab18 PE=1 SV=2	23	6.92139e+06	8.24263e+06	1.04896e+07	1.64651e+07	1.66034e+07	1.7995e+07	6.63179e+06	5.72054e+06	7.2017e+06	8.07264e+06	4.9477e+06	8.08866e+06
Q68EF0	Rab-3A-interacting protein OS=Mus musculus OX=10090 GN=Rab3ip PE=1 SV=1	47.1							60355.9	189935	82017.3	130238	60512.4	57470.3
P70662	LIM domain-binding protein 1 OS=Mus musculus OX=10090 GN=Ldb1 PE=1 SV=2	46.5	565290	579905		876185	487256	859875	517716	242310	615843	1.24115e+06	1.00377e+06	1.18721e+06
P29416	Beta-hexosaminidase subunit alpha OS=Mus musculus OX=10090 GN=Hexa PE=1 SV=2	60.6	1.17896e+06	1.12411e+06	1.14819e+06	1.59383e+06	2.78399e+06	2.13515e+06	517473	692840	769131	755858	546409	573775
Q9WUK4	Replication factor C subunit 2 OS=Mus musculus OX=10090 GN=Rfc2 PE=1 SV=1	38.7	1.40505e+06	3.50457e+06	1.28881e+06		541162	519969	1.19947e+07	1.99728e+07	1.13767e+07	721138	1.25412e+06	315891
Q9DB34	Charged multivesicular body protein 2a OS=Mus musculus OX=10090 GN=Chmp2a PE=1 SV=1	25.1	1.61633e+06	1.7478e+06	528085	1.46892e+06	1.23134e+06	944349	3.49757e+06	2.40301e+06	2.74673e+06	1.66864e+06	1.45995e+06	1.47767e+06
Q8BGQ1	Spermatogenesis-defective protein 39 homolog OS=Mus musculus OX=10090 GN=Vipas39 PE=1 SV=1	56.6							205165	171492		202964		100667
Q6PAM1	Alpha-taxilin OS=Mus musculus OX=10090 GN=Txlna PE=1 SV=1	62.3	383591	301471	727677	326576	306578	230208	2.57148e+06	2.40103e+06	2.75495e+06	776220	696769	1.13649e+06
Q9R0H0	Peroxisomal acyl-coenzyme A oxidase 1 OS=Mus musculus OX=10090 GN=Acox1 PE=1 SV=5	74.6		601993	73693.3	975336	1.23948e+06	1.13491e+06	1.6157e+06	110108	1.48219e+06	5065896	4.47252e+06	4.91396e+06
Q9WTX5	S-phase kinase-associated protein 1 OS=Mus musculus OX=10090 GN=Skp1 PE=1 SV=3	18.7	2.22962e+07	1.62083e+07	2.25149e+07	2.70794e+07	2.57709e+07	1.7937e+07	4.08653e+07	3.4607e+07	3.31201e+07	2.57846e+07	2.31044e+07	1.58121e+07
Q6PHU5	Sortilin OS=Mus musculus OX=10090 GN=Sort1 PE=1 SV=1	91.1	54347.3			515273	532700	534232	36503.4		24082.9	437864	383548	412427
Q8R2U0	Nucleoporin SEH1 OS=Mus musculus OX=10090 GN=Seh1l PE=2 SV=1	39.7	1.46817e+06	1.59167e+06		658318		180723	5.24862e+06	6.65441e+06	2.1055e+06	1.21016e+06	449747	1.48333e+06
Q99J72	DNA dC->dU-editing enzyme APOBEC-3 OS=Mus musculus OX=10090 GN=Apobec3 PE=1 SV=3	52.2	198248	193152	173375				2.9519e+06	2.42296e+06	2.56217e+06		265696	386078
Q9DBR0	A-kinase anchor protein 8 OS=Mus musculus OX=10090 GN=Akap8 PE=1 SV=1	76.2	2.46254e+06	1.76256e+06	2.31007e+06	687732	902887	1.04374e+06	7.21933e+06	6.56344e+06	5.83309e+06	1.98369e+06	1.15621e+06	989233
P12265	Beta-glucuronidase OS=Mus musculus OX=10090 GN=Gusb PE=1 SV=2	74.1		306653	77693.8	163563	145151
Q8CE90	Dual specificity mitogen-activated protein kinase kinase 7 OS=Mus musculus OX=10090 GN=Map2k7 PE=1 SV=1	59.3	907188	780166	550279	780476	1.35261e+06	467729	1.11776e+06	1247471	687936	757858	775117	260830
B2RX14	Terminal uridylyltransferase 4 OS=Mus musculus OX=10090 GN=Tut4 PE=1 SV=2	184.5									185105		175250
Q5I043	Ubiquitin carboxyl-terminal hydrolase 28 OS=Mus musculus OX=10090 GN=Usp28 PE=1 SV=1	119.2	559488	415058			354956		7.58942e+06	9.51346e+06	7.40218e+06	1.48978e+06	2.03061e+06	862934
Q3UMQ8	H/ACA ribonucleoprotein complex non-core subunit NAF1 OS=Mus musculus OX=10090 GN=Naf1 PE=1 SV=2	53.2	912600	262387	597007		139602	192387	6.02669e+06	6.52937e+06	5.82656e+06	540979	301639	554519
Q99MR6	Serrate RNA effector molecule homolog OS=Mus musculus OX=10090 GN=Srrt PE=1 SV=1	100.4	6.6673e+06	5.71823e+06	3.00498e+06	5.89982e+06	6.15507e+06	5.28165e+06	1.82704e+07	1.76142e+07	6.32622e+06	8.43237e+06	6.4202e+06	7.52808e+06
Q9CXE7	Transmembrane emp24 domain-containing protein 5 OS=Mus musculus OX=10090 GN=Tmed5 PE=1 SV=1	26.2							506280	192062	153322	244582	258806	113315
Q8BU14	Translocation protein SEC62 OS=Mus musculus OX=10090 GN=Sec62 PE=1 SV=1	45.6							551286	438613	327223	257621	238019	488411
Q8CD92	Tetratricopeptide repeat protein 27 OS=Mus musculus OX=10090 GN=Ttc27 PE=1 SV=2	96.4	376606	136974	923596		278193		3.49765e+06	4.38213e+06	3.43385e+06	98076	316720	275349
P08122	Collagen alpha-2(IV) chain OS=Mus musculus OX=10090 GN=Col4a2 PE=1 SV=4	167.2							304598	234225	499758	143922	354750	255717
Q6NVE8	WD repeat-containing protein 44 OS=Mus musculus OX=10090 GN=Wdr44 PE=1 SV=1	101.5									40405.8			41002
Q922J3	CAP-Gly domain-containing linker protein 1 OS=Mus musculus OX=10090 GN=Clip1 PE=1 SV=1	155.7							126515	18366.4		32371	27514.9	19607.7
P97310	DNA replication licensing factor MCM2 OS=Mus musculus OX=10090 GN=Mcm2 PE=1 SV=3	102	1.62449e+07	1.75609e+07	2.17184e+07	5.21493e+06	8.88858e+06	1.44326e+07	5.71631e+07	6.5657e+07	6.43902e+07	1.38949e+07	1.66184e+07	1.30283e+07
Q8K3D3	DNA repair protein SWI5 homolog OS=Mus musculus OX=10090 GN=Swi5 PE=1 SV=1	10.3	85445.6	114095	123481		172121	124396	5319406	7.67206e+06	5.96842e+06	1.85023e+06	2.48425e+06	1.91577e+06
Q8VHK9	ATP-dependent DNA/RNA helicase DHX36 OS=Mus musculus OX=10090 GN=Dhx36 PE=1 SV=2	113.8	233423	527270	126165	100539	525149	473536	1.32147e+07	1.21073e+07	9.45694e+06	7.64774e+06	5.78284e+06	6.26472e+06
Q5RJH6	Protein SMG7 OS=Mus musculus OX=10090 GN=Smg7 PE=2 SV=1	126.8	283082	381869	355141	129120	203222	150302	1.08485e+06	789360	1.16922e+06	172138	465884	144145
Q99LU0	Charged multivesicular body protein 1b-1 OS=Mus musculus OX=10090 GN=Chmp1b1 PE=1 SV=1	22.1	159118	119614	76353.5	1.44226e+06	1.35026e+06	1.35274e+06	38276.1	475165	391003	1.04172e+06	1.20488e+06	1.12805e+06
Q6PB44	Tyrosine-protein phosphatase non-receptor type 23 OS=Mus musculus OX=10090 GN=Ptpn23 PE=1 SV=2	185.1	6.84274e+06	6.14532e+06	6.47278e+06	3443261	6.10067e+06	4.703e+06	6.03186e+06	5.46276e+06	6.87043e+06	1.24558e+06	2.819e+06	2.55513e+06
Q9CW03	Structural maintenance of chromosomes protein 3 OS=Mus musculus OX=10090 GN=Smc3 PE=1 SV=2	141.5	1.60911e+06	979264	1.89924e+06	2.98771e+06	63016.6	627983	1.52934e+07	1.1451e+07	1.14064e+07	1.31827e+06	1.89284e+06	3.45054e+06
P08553	Neurofilament medium polypeptide OS=Mus musculus OX=10090 GN=Nefm PE=1 SV=4	95.9		223023	851514	724612	1.50484e+06	1.56619e+06	186014	88597.7	105440	255453	411001	1.56607e+06
Q9CQJ4	E3 ubiquitin-protein ligase RING2 OS=Mus musculus OX=10090 GN=Rnf2 PE=1 SV=1	37.6	446676	429884	827819	560906	887339		3.87212e+06	4.65082e+06	1.52273e+06	498469	431373	541477
P55065	Phospholipid transfer protein OS=Mus musculus OX=10090 GN=Pltp PE=1 SV=1	54.4			510433			472457
Q60967	Bifunctional 3'-phosphoadenosine 5'-phosphosulfate synthase 1 OS=Mus musculus OX=10090 GN=Papss1 PE=1 SV=1	70.7	867583	778557	289157	4.76239e+06	6.55059e+06	6.09909e+06	730194	704238	787687	2.46193e+06	4.09244e+06	4.1455e+06
Q76KJ5	DNA-directed RNA polymerase I subunit RPA34 OS=Mus musculus OX=10090 GN=Cd3eap PE=1 SV=2	43.1	88362.7		12785				105685		30223.3
Q64008	Ras-related protein Rab-34 OS=Mus musculus OX=10090 GN=Rab34 PE=1 SV=2	29.1	172205	170266	166580	116608	369056	256885
P42227	Signal transducer and activator of transcription 3 OS=Mus musculus OX=10090 GN=Stat3 PE=1 SV=2	88	215247	223171	645817	149742	129880		1.30835e+07	9.78961e+06	9.54408e+06	1.47604e+06	872265	865893
A2AHC3	Calmodulin-regulated spectrin-associated protein 1 OS=Mus musculus OX=10090 GN=Camsap1 PE=1 SV=1	175.8				69804.9		49789.6	49039.4	138349	141062	256661	289982	73064.8
Q6PCM1	Lysine-specific demethylase 3A OS=Mus musculus OX=10090 GN=Kdm3a PE=1 SV=1	147.8	430386	1.15438e+06	412023	181872	131978	142648	4.43301e+06	6.00709e+06	7.45678e+06	316593	836155	1.29506e+06
Q8BUI3	Leucine-rich repeat and WD repeat-containing protein 1 OS=Mus musculus OX=10090 GN=LRWD1 PE=2 SV=1	71.5							5.46774e+06	5.16734e+06	3.99186e+06	4881386	2318890	3803644
Q62148	Retinal dehydrogenase 2 OS=Mus musculus OX=10090 GN=Aldh1a2 PE=1 SV=2	56.6	441046	206876		9.29947e+06	245216	1.07742e+06			340873	2.7917e+06	51608.9	336345
Q61216	Double-strand break repair protein MRE11 OS=Mus musculus OX=10090 GN=Mre11 PE=1 SV=1	80.2	361294				114948		5.27031e+06	2.40748e+06	1.42008e+06	3.05522e+06	959220	441097
Q8BUV3	Gephyrin OS=Mus musculus OX=10090 GN=Gphn PE=1 SV=2	83.2	533231	1.07636e+06	954605	1.5388e+07	8.7854e+06	8.83473e+06	888082	499012	155272	3.25726e+06	2.03005e+06	2.26117e+06
O35098	Dihydropyrimidinase-related protein 4 OS=Mus musculus OX=10090 GN=Dpysl4 PE=1 SV=1	61.9	596566	471779	958737	1.70421e+08	8.58767e+07	7.31795e+07	707775	744356	170169	4.94493e+07	2.68254e+07	2.66276e+07
Q8CJ26	Death domain-containing membrane protein NRADD OS=Mus musculus OX=10090 GN=Nradd PE=1 SV=1	24.7
Q9DAM7	Transmembrane protein 263 OS=Mus musculus OX=10090 GN=Tmem263 PE=1 SV=1	11.5	305767	372547	366046	2.45974e+06	2.78606e+06	2.65944e+06	454256	590502	1.00885e+06	2.13852e+06	2.38274e+06	2.28682e+06
Q8VE80	THO complex subunit 3 OS=Mus musculus OX=10090 GN=Thoc3 PE=2 SV=1	38.7	96648.6	248064		205045	179346
Q99LG4	Tetratricopeptide repeat protein 5 OS=Mus musculus OX=10090 GN=Ttc5 PE=1 SV=2	48.8	182958	325837	811989	1.18397e+06	657266	510776	1.47946e+06	1.2732e+06	915119	1.79122e+06	695256	1.07619e+06
Q9WTP6	Adenylate kinase 2, mitochondrial OS=Mus musculus OX=10090 GN=Ak2 PE=1 SV=5	26.5	1.18441e+07	1.18771e+07	1.47551e+07	3.03594e+07	4.02275e+07	2.65783e+07	4.79539e+07	6.246e+07	5.79731e+07	6.41249e+07	3.49837e+07	1.14235e+08
Q9JIG7	Coiled-coil domain-containing protein 22 OS=Mus musculus OX=10090 GN=Ccdc22 PE=1 SV=1	70.8	1.26882e+06	1.02716e+06	803602	1.65517e+06	1.72013e+06	1.20811e+06	418039	448638	472844	400614	323445	210228
P32020	Non-specific lipid-transfer protein OS=Mus musculus OX=10090 GN=Scp2 PE=1 SV=3	59.1	2.89029e+06	1.99842e+06	1.81693e+06	7.91945e+06	7.6709e+06	7.75453e+06	4.52975e+06	3157354	6.13266e+06	7.68807e+06	5.96583e+06	7.98972e+06
Q5SWD9	Pre-rRNA-processing protein TSR1 homolog OS=Mus musculus OX=10090 GN=Tsr1 PE=1 SV=1	92	1.96822e+06	1.88532e+06	2.10592e+06	511974	866622	280138	1.06339e+07	1.51176e+07	1.17232e+07	1.99162e+06	1.14535e+06	1.21664e+06
P42209	Septin-1 OS=Mus musculus OX=10090 GN=Sept1 PE=1 SV=2	42	1.18448e+06	1.59627e+06	1.96028e+06	177228	26793.5	70029.2	1.35385e+07	1.54021e+07	1.44323e+07		4.29609e+06	390718
Q99KY4	Cyclin-G-associated kinase OS=Mus musculus OX=10090 GN=Gak PE=1 SV=2	143.6	40887.6		120547	237725			574514	518670	656386	389195	193515	176124
Q8CIV8	Tubulin-specific chaperone E OS=Mus musculus OX=10090 GN=Tbce PE=1 SV=1	59	1.85438e+06	2.40618e+06	453471	1.6854e+06	3.25365e+06	955500	1.08761e+06	1.19434e+06	1.58251e+06	890396	1.05777e+06	506752
O88983	Syntaxin-8 OS=Mus musculus OX=10090 GN=Stx8 PE=1 SV=1	26.9		331101	455331		379559		297282	558960	275806	32772.4	97257.6	62531.4
Q9Z0H7	B-cell lymphoma/leukemia 10 OS=Mus musculus OX=10090 GN=Bcl10 PE=1 SV=1	25.9
Q8BTW9	Serine/threonine-protein kinase PAK 4 OS=Mus musculus OX=10090 GN=Pak4 PE=1 SV=1	64.6	722734	403823	159796	37457.8	167313	147601	5.69336e+06	3.17841e+06	2.45948e+06	2.04045e+06	148821	253651
Q9Z2Q6	Septin-5 OS=Mus musculus OX=10090 GN=Sept5 PE=1 SV=2	42.7			70328.9	1.15385e+07	5.13575e+06	4.83824e+06			28674	5.81746e+06	2.23144e+06	2.81193e+06
Q61036	Serine/threonine-protein kinase PAK 3 OS=Mus musculus OX=10090 GN=Pak3 PE=1 SV=2	62.4				1.75232e+06	347344	295711				1.096e+06	538526	234520
Q9DC70	NADH dehydrogenase [ubiquinone] iron-sulfur protein 7, mitochondrial OS=Mus musculus OX=10090 GN=Ndufs7 PE=1 SV=1	24.7	1.28218e+06	1.96548e+06	1.05945e+06	275850	185531	412286	7.00715e+06	6.56496e+06	4.56726e+06	86911.7	1.85334e+06	874017
Q8VDQ9	Protein KRI1 homolog OS=Mus musculus OX=10090 GN=Kri1 PE=1 SV=3	82							168979	123658	62635.1	90895.6	30962.2	134977
Q9JKV1	Proteasomal ubiquitin receptor ADRM1 OS=Mus musculus OX=10090 GN=Adrm1 PE=1 SV=2	42	5.80184e+06	1.89054e+06	6.66594e+06	2.60142e+06	3.75924e+06	2.19715e+06	3.94838e+06	7345952	7.27001e+06	1.66937e+06	2.28868e+06	1.36406e+06
Q8R5M8	Cell adhesion molecule 1 OS=Mus musculus OX=10090 GN=Cadm1 PE=1 SV=2	49.8							402616		526080	564874		198250
Q8BWW4	La-related protein 4 OS=Mus musculus OX=10090 GN=Larp4 PE=1 SV=2	79.7	685917	771278	766026		614616	394681	4.1634e+06	5.5078e+06	5.17436e+06	994399	289424	339803
Q91YE3	Egl nine homolog 1 OS=Mus musculus OX=10090 GN=Egln1 PE=1 SV=2	43.1	397954	351240	303850	526887	561612	419611
Q9D4C9	Clavesin-1 OS=Mus musculus OX=10090 GN=Clvs1 PE=1 SV=1	40.6				1.26232e+06	180589					1.15545e+06	174609
Q91VR7	Microtubule-associated proteins 1A/1B light chain 3A OS=Mus musculus OX=10090 GN=Map1lc3a PE=1 SV=1	14.3	68539			3052894	2532541	1.67179e+06		102991		2.30251e+06	1.93244e+06	1.38461e+06
Q9Z1E4	Glycogen [starch] synthase, muscle OS=Mus musculus OX=10090 GN=Gys1 PE=1 SV=2	83.9	505281	572931	403853	3.86379e+06	4.46935e+06	3.30133e+06	748841	308664	147189	538229	1.90201e+06	1.33039e+06
Q3TCH7	Cullin-4A OS=Mus musculus OX=10090 GN=Cul4a PE=1 SV=1	87.7	97143.9	420695	417584	1.56168e+06	1.51119e+06	792585	423519	518976	693651	1.13511e+06	940018	1.28505e+06
Q80X95	Ras-related GTP-binding protein A OS=Mus musculus OX=10090 GN=Rraga PE=1 SV=1	36.5	468528	563415	659761	3.77546e+06	3.12688e+06	1.81002e+06	1.1593e+06	1.47283e+06	519462	2.9247e+06	1.68758e+06	1.8057e+06
Q91VY5	Lysine-specific demethylase 4B OS=Mus musculus OX=10090 GN=Kdm4b PE=2 SV=1	121.5						1.17971e+06	284366	20444.6		598788		314286
Q8K327	Chromosome alignment-maintaining phosphoprotein 1 OS=Mus musculus OX=10090 GN=Champ1 PE=1 SV=1	87.5							913181	1.05475e+06		175304	88422.6	248926
Q9QYI3	DnaJ homolog subfamily C member 7 OS=Mus musculus OX=10090 GN=Dnajc7 PE=1 SV=2	56.4	4.54824e+06	3.47848e+06	5.71162e+06	1.1666e+06	1.81126e+06	1.73963e+06	2.6071e+07	2.61107e+07	3.09198e+07	3.61626e+06	5.50882e+06	3.43728e+06
Q8BIL5	Protein Hook homolog 1 OS=Mus musculus OX=10090 GN=Hook1 PE=1 SV=2	84.4	208891	432441	307405	313672	227130	253454	3.5866e+06	3.56968e+06	3.70104e+06	2.14702e+06	1.33658e+06	849602
Q9CWR8	DNA (cytosine-5)-methyltransferase 3-like OS=Mus musculus OX=10090 GN=Dnmt3l PE=1 SV=1	48	2.35205e+06	2587325	1.52272e+06		639166		1.45443e+07	1.58442e+07	9.84594e+06	143789	171727	120194
Q3U4G3	Xyloside xylosyltransferase 1 OS=Mus musculus OX=10090 GN=Xxylt1 PE=1 SV=2	43.8							190569	129112			91106.1	78105.4
Q8BTV2	Cleavage and polyadenylation specificity factor subunit 7 OS=Mus musculus OX=10090 GN=Cpsf7 PE=1 SV=2	52	215175	236549		117131		108757	305306	209875	67313.1			767387
P52795	Ephrin-B1 OS=Mus musculus OX=10090 GN=Efnb1 PE=1 SV=1	37.8				767854	350779					827659	348724
Q9WV54	Acid ceramidase OS=Mus musculus OX=10090 GN=Asah1 PE=1 SV=1	44.6	5.82298e+06	4.93656e+06	7.96498e+06	1.60608e+07	9.45915e+06	1.03451e+07	6.43551e+06	4.13029e+06	6.74758e+06	5.77406e+06	3.7084e+06	4.34177e+06
Q7TQH0	Ataxin-2-like protein OS=Mus musculus OX=10090 GN=Atxn2l PE=1 SV=1	110.6	3.53375e+06	3.34449e+06	2.90718e+06	1.1867e+07	4.13971e+06	4.52284e+06	1.77393e+07	1.64528e+07	1.86197e+07	1.97499e+07	7.6131e+06	1.75405e+07
Q9CQF0	39S ribosomal protein L11, mitochondrial OS=Mus musculus OX=10090 GN=Mrpl11 PE=1 SV=1	20.7	389806	362452	205401	76843.8	39361.8	142075	1.12845e+06	841582	1.1817e+06	148765	103176	80769.5
Q5SS00	DBF4-type zinc finger-containing protein 2 homolog OS=Mus musculus OX=10090 GN=Zdbf2 PE=2 SV=1	273.6							42441.4		16147.8			23444.4
Q9CXU9	Eukaryotic translation initiation factor 1b OS=Mus musculus OX=10090 GN=Eif1b PE=1 SV=2	12.8				1082307	1304403	614685		230576		2.74786e+06	2.36449e+06	1.08852e+06
Q8CDG3	Deubiquitinating protein VCIP135 OS=Mus musculus OX=10090 GN=Vcpip1 PE=1 SV=1	134.4							318727	594740	394678	198666	331539	329454
Q91ZZ3	Beta-synuclein OS=Mus musculus OX=10090 GN=Sncb PE=1 SV=1	14				4.85511e+06	1.57751e+06	3095970				4.3693e+06	1.4156e+06	2.18756e+06
Q9EQP2	EH domain-containing protein 4 OS=Mus musculus OX=10090 GN=Ehd4 PE=1 SV=1	61.4	69808.5	154311	84040.9		172655	175752	3.84026e+06	4.84299e+06	3.17242e+06	1.22688e+06	1.90651e+06	1.00408e+06
O35566	CD151 antigen OS=Mus musculus OX=10090 GN=Cd151 PE=1 SV=2	28.2	182101		175895			242904	203384		231269			76544.3
Q9D6Z1	Nucleolar protein 56 OS=Mus musculus OX=10090 GN=Nop56 PE=1 SV=2	64.4	130207	121201	170715	76806.4	26235.3	156729	2.64735e+06	2.10113e+06	1.37976e+06	564693	308346	366394
D3Z6Q9	Bridging integrator 2 OS=Mus musculus OX=10090 GN=Bin2 PE=1 SV=1	52.5							100680	149385	255182	249529	305875
Q922S8	Kinesin-like protein KIF2C OS=Mus musculus OX=10090 GN=Kif2c PE=1 SV=1	81	342987	111827					1.05071e+07	1.11793e+07	4.52646e+06	708300	411729	1.39373e+06
Q3TPX4	Exocyst complex component 5 OS=Mus musculus OX=10090 GN=Exoc5 PE=1 SV=2	81.7	881188		590045	1.56288e+06	1.14071e+06	1.70175e+06				102452		239055
P31938	Dual specificity mitogen-activated protein kinase kinase 1 OS=Mus musculus OX=10090 GN=Map2k1 PE=1 SV=2	43.4	9.14572e+06	8.99235e+06	1.08691e+07	8.39182e+06	1.25499e+07	8.34689e+06	1.64451e+07	1.45501e+07	1.31937e+07	7.90686e+06	5.20133e+06	5.26768e+06
Q69ZX6	MORC family CW-type zinc finger protein 2A OS=Mus musculus OX=10090 GN=Morc2a PE=1 SV=2	117.3							933442	1.23795e+06	1.1518e+06	510294	860197	713378
Q8R480	Nuclear pore complex protein Nup85 OS=Mus musculus OX=10090 GN=Nup85 PE=1 SV=1	74.7	2.93909e+06	2.29222e+06	218134	325743	324300	403147	1.48098e+07	16218222	5.17045e+06	2.29116e+06	1.04425e+06	1.0376e+06
P47226	Testin OS=Mus musculus OX=10090 GN=Tes PE=1 SV=1	48			31876.2	181956	26977.5	199749				129826	7434.47	152354
Q8C650	Septin-10 OS=Mus musculus OX=10090 GN=Sept10 PE=1 SV=1	52.4									116969			84563.7
Q8BUK6	Protein Hook homolog 3 OS=Mus musculus OX=10090 GN=Hook3 PE=1 SV=2	83.2	449589	87994.4	651931	3.36537e+06	3.12632e+06	2.7258e+06	346624	495480	354704	2.03067e+06	1.56389e+06	1.46084e+06
Q3UHD6	Sorting nexin-27 OS=Mus musculus OX=10090 GN=Snx27 PE=1 SV=2	61							633060	786968	627401	481944	828630	196484
Q80X82	Symplekin OS=Mus musculus OX=10090 GN=Sympk PE=1 SV=1	142.2	690473	620909	317164	214433	621193	410254	6.66671e+06	9.17639e+06	5.33072e+06	2.47276e+06	1.63351e+06	2.19787e+06
Q60793	Krueppel-like factor 4 OS=Mus musculus OX=10090 GN=Klf4 PE=1 SV=3	51.8
O08992	Syntenin-1 OS=Mus musculus OX=10090 GN=Sdcbp PE=1 SV=1	32.4		374068		212795	304342	150129	629730	549268	1.06321e+06	2.40879e+06	1.52865e+06	2.12208e+06
O55236	mRNA-capping enzyme OS=Mus musculus OX=10090 GN=Rngtt PE=1 SV=1	68.6	128728	76659	284952	159295	1.16718e+06	321109	278030	174500	284077	260057	278451	269064
Q9D0D3	Poly(A) RNA polymerase, mitochondrial OS=Mus musculus OX=10090 GN=Mtpap PE=1 SV=1	65.2			255719				2.35378e+06	2.64248e+06	1.79626e+06	455849	512825	392552
Q9ER73	Elongator complex protein 4 OS=Mus musculus OX=10090 GN=Elp4 PE=1 SV=2	46.3		655188	1.29868e+06	117336	791849	356314	345379	437456	812434	289298	294258	322678
P14824	Annexin A6 OS=Mus musculus OX=10090 GN=Anxa6 PE=1 SV=3	75.8	1.22017e+07	1.15736e+07	1.79241e+07	1.28243e+07	8.29188e+06	7.61787e+06	1.07531e+07	1.35551e+07	7.11393e+06	2.78598e+06	2.92632e+06	2.69941e+06
Q3V1L4	Cytosolic purine 5'-nucleotidase OS=Mus musculus OX=10090 GN=Nt5c2 PE=1 SV=2	64.8	1.70327e+06	1.22629e+06	1.2927e+06	5.44768e+06	222149	3.7622e+06	1.35822e+06	1.82026e+06	1.02619e+06	1.16492e+06	248525	977100
P20357	Microtubule-associated protein 2 OS=Mus musculus OX=10090 GN=Map2 PE=1 SV=2	199	616908	1.2458e+06	849686	1.03221e+08	5.15368e+07	5.37875e+07	1.72135e+06	1.31062e+06	1.59424e+06	7.7074e+07	3.40947e+07	3.96505e+07
Q3UW53	Protein Niban OS=Mus musculus OX=10090 GN=Fam129a PE=1 SV=2	102.6	145200	100793	250435				5.11074e+06	4.9498e+06	4.63522e+06	237070	170807	176495
Q6PGN3	Serine/threonine-protein kinase DCLK2 OS=Mus musculus OX=10090 GN=Dclk2 PE=1 SV=1	82.9				222890	160818	171166			35085.8	298156	139498	166763
Q61831	Mitogen-activated protein kinase 10 OS=Mus musculus OX=10090 GN=Mapk10 PE=1 SV=2	52.5				287722	584082	376531		162186		713141	724505	508066
Q8R4H2	Rho guanine nucleotide exchange factor 12 OS=Mus musculus OX=10090 GN=Arhgef12 PE=1 SV=2	172.2				113804	69630.5					76398.5	65144.7	13935.4
P17879	Heat shock 70 kDa protein 1B OS=Mus musculus OX=10090 GN=Hspa1b PE=1 SV=3	70.1	591106	430854	472227	665165	1.06945e+06	553829	819211	922322	746156	500497	684630	345978
Q3TRM4	Neuropathy target esterase OS=Mus musculus OX=10090 GN=Pnpla6 PE=1 SV=2	149.4
Q8R3H7	Heparan sulfate 2-O-sulfotransferase 1 OS=Mus musculus OX=10090 GN=Hs2st1 PE=1 SV=2	41.8							124852					86987.9
Q8BG40	Katanin p80 WD40 repeat-containing subunit B1 OS=Mus musculus OX=10090 GN=Katnb1 PE=1 SV=1	72.6	145941	122478	220872			71721.2	1.02499e+06	734901	430420	95482.4	93389
Q9R1R2	Tripartite motif-containing protein 3 OS=Mus musculus OX=10090 GN=Trim3 PE=1 SV=1	80.7			116320	581894	316861	96738.7				177117	55381.4	62338.6
Q64261	Cyclin-dependent kinase 6 OS=Mus musculus OX=10090 GN=Cdk6 PE=1 SV=2	37									78023.8		19137.5	29674.7
Q91W18	Tudor domain-containing protein 3 OS=Mus musculus OX=10090 GN=Tdrd3 PE=1 SV=4	82.2		64236.5				64847.3
Q80TL7	Protein MON2 homolog OS=Mus musculus OX=10090 GN=Mon2 PE=1 SV=2	189	816556	67270.6		287292		486314	266327	473053	649064	386748	336887	164561
O70230	Zinc finger protein 143 OS=Mus musculus OX=10090 GN=Znf143 PE=1 SV=2	69
Q8JZK9	Hydroxymethylglutaryl-CoA synthase, cytoplasmic OS=Mus musculus OX=10090 GN=Hmgcs1 PE=1 SV=1	57.5	6.4391e+06	5.21278e+06	9.04422e+06	3.37478e+07	4.40008e+07	3.78553e+07	3.00683e+07	3.36911e+07	4.96058e+07	6.95081e+07	9.50624e+07	8.42576e+07
Q6PFD9	Nuclear pore complex protein Nup98-Nup96 OS=Mus musculus OX=10090 GN=Nup98 PE=1 SV=2	197.1	1.76683e+06	1.24239e+07	437622	604395	690419	707423	1.71675e+07	2.16832e+07	4.04773e+06	768790	1.94511e+06	1.83964e+06
P58742	Aladin OS=Mus musculus OX=10090 GN=Aaas PE=1 SV=1	59.4	360182	327729	59344	166684		126138	5.46413e+06	5.91548e+06	2.48926e+06	1.06197e+06	415676	492762
Q8C0L0	Thioredoxin-related transmembrane protein 4 OS=Mus musculus OX=10090 GN=Tmx4 PE=1 SV=2	37.1	135933	306466	156445	2.64283e+06	2.03118e+06	1.83395e+06	798678	851591	709549	4.85757e+06	2.95718e+06	2.90645e+06
Q7TPS0	Ribosomal protein S6 kinase alpha-6 OS=Mus musculus OX=10090 GN=Rps6ka6 PE=1 SV=2	86.5
P37804	Transgelin OS=Mus musculus OX=10090 GN=Tagln PE=1 SV=3	22.6		314914		231444	1.77125e+06	1.73656e+06					813756	976049
Q99LY9	NADH dehydrogenase [ubiquinone] iron-sulfur protein 5 OS=Mus musculus OX=10090 GN=Ndufs5 PE=1 SV=3	12.6	927908	831805	675432	1.59341e+06	613370	829173	4.19666e+06	2910098	1.86799e+06	2.55763e+06	1.9618e+06	398961
Q8CG47	Structural maintenance of chromosomes protein 4 OS=Mus musculus OX=10090 GN=Smc4 PE=1 SV=1	146.8	2.66061e+07	2.41421e+06	4.18724e+07	2.33453e+06	4.5483e+06	1.10362e+07	1.51098e+07	1.57947e+07	1.48948e+07	1.32578e+06	2.16041e+06	3.00254e+06
Q8BKT8	HAUS augmin-like complex subunit 7 OS=Mus musculus OX=10090 GN=Haus7 PE=1 SV=2	40.6							1.60703e+06	2.19696e+06	728381	1.36586e+06	1.46466e+06	200426
Q9JKK1	Syntaxin-6 OS=Mus musculus OX=10090 GN=Stx6 PE=1 SV=1	29		99889.1	54580	503153	385463	381962	101442	75105	120766	512529	404294	315625
Q8CCT4	Transcription elongation factor A protein-like 5 OS=Mus musculus OX=10090 GN=Tceal5 PE=1 SV=1	22				140128	136242	106406			22899.1	137218	110218	87954.4
Q6ZPY2	Protein SMG5 OS=Mus musculus OX=10090 GN=Smg5 PE=1 SV=2	114
Q9JLR1	Protein transport protein Sec61 subunit alpha isoform 2 OS=Mus musculus OX=10090 GN=Sec61a2 PE=2 SV=3	52.2	536343	193682	114820		1.97526e+06	2.52099e+06	365431	572116	493692	195185	403416	517845
Q9JJT9	Phosphorylated adapter RNA export protein OS=Mus musculus OX=10090 GN=Phax PE=1 SV=1	43.2	303687	113568	413933	137009	78894.6	416435	2.97515e+06	3.10115e+06	2.71863e+06	835852	568535	905559
Q3U5F4	YrdC domain-containing protein, mitochondrial OS=Mus musculus OX=10090 GN=Yrdc PE=1 SV=1	29.4	33256.8		49072.6	96030.2		29938.2	826986	1.46079e+06	1.29072e+06	594509	543005	675188
P12367	cAMP-dependent protein kinase type II-alpha regulatory subunit OS=Mus musculus OX=10090 GN=Prkar2a PE=1 SV=2	45.4	1.35075e+06	2.22673e+06	513267	3.05877e+07	2.00841e+07	2.11873e+07	2.30462e+06	4.45325e+06	3.74371e+06	1.08233e+08	4.43105e+07	3.62374e+06
Q80TV8	CLIP-associating protein 1 OS=Mus musculus OX=10090 GN=Clasp1 PE=1 SV=2	169.1	695844	1.81445e+06	663831	1.43452e+07	1.26314e+07	1.31119e+07	2.18679e+06	2.27583e+06	1.31973e+06	1.28442e+07	8.30535e+06	9.34715e+06
Q9QXA1	Cysteine and histidine-rich protein 1 OS=Mus musculus OX=10090 GN=Cyhr1 PE=1 SV=1	35.7						23692.7
O70325	Phospholipid hydroperoxide glutathione peroxidase OS=Mus musculus OX=10090 GN=Gpx4 PE=1 SV=4	22.2	2.70929e+06	2.6687e+06	2.76774e+06	1.59467e+06	3.54959e+06	2.27916e+06	7.46636e+06	7.60269e+06	7.90739e+06	2.31359e+06	2.68385e+06	2.48816e+06
Q8CH02	SURP and G-patch domain-containing protein 1 OS=Mus musculus OX=10090 GN=Sugp1 PE=1 SV=1	72.6							978109	1.20714e+06	64734.5	1.97911e+06		518180
Q8BHE3	Caytaxin OS=Mus musculus OX=10090 GN=Atcay PE=1 SV=1	42.2				288569	127996	118500	32009.9		58802.1	391056	148172	149536
Q9DCR2	AP-3 complex subunit sigma-1 OS=Mus musculus OX=10090 GN=Ap3s1 PE=1 SV=2	21.7	51205.9	104098	205913	1.23298e+06	741653	968419		159406	176104	223362	455409	260182
Q8BSS9	Liprin-alpha-2 OS=Mus musculus OX=10090 GN=Ppfia2 PE=1 SV=2	143.1			36111.7	64113.2	26084.3
Q99JN2	Kelch-like protein 22 OS=Mus musculus OX=10090 GN=Klhl22 PE=1 SV=1	71.6							120075	201410	710857	665964		457800
P16015	Carbonic anhydrase 3 OS=Mus musculus OX=10090 GN=Ca3 PE=1 SV=3	29.3	198142	154794	197503	9.86373e+06	1.06918e+06	2.50332e+06		714633		1.97251e+06	60301.6	490544
Q9CQL7	MORF4 family-associated protein 1 OS=Mus musculus OX=10090 GN=Mrfap1 PE=1 SV=1	14.2			8788313				8.92022e+06	1.06911e+07	7.22717e+06	1.11627e+06	123403	752712
P35762	CD81 antigen OS=Mus musculus OX=10090 GN=Cd81 PE=1 SV=2	25.8	3.80045e+06	3.79783e+06	1.31775e+06	5.89608e+06	706105	5.23887e+06	1.73155e+06	3.58057e+06	2.41371e+06	696213	643697	1.8782e+06
P07214	SPARC OS=Mus musculus OX=10090 GN=Sparc PE=1 SV=1	34.4		533694		95743	87341.6	609159	537426	3.04787e+06	294049	813560	1.44135e+06	2.13914e+06
Q9CQT2	RNA-binding protein 7 OS=Mus musculus OX=10090 GN=Rbm7 PE=1 SV=1	30.1							980257	3.45449e+06	1.53338e+06	886426	977253	1.00488e+06
Q9QZ23	NFU1 iron-sulfur cluster scaffold homolog, mitochondrial OS=Mus musculus OX=10090 GN=Nfu1 PE=1 SV=2	28.5	686359	706940	390052	860788	869896	682836	6.38549e+06	6.25452e+06	5.40678e+06	3391192	3.25404e+06	2.55827e+06
Q9EPB4	Apoptosis-associated speck-like protein containing a CARD OS=Mus musculus OX=10090 GN=Pycard PE=1 SV=1	21.4	2.26342e+06	1.34945e+06	1.41425e+06	1.60425e+06	1.35254e+06	137807	1.74161e+06	2.92626e+06	1776924	961236	127781	241427
P16460	Argininosuccinate synthase OS=Mus musculus OX=10090 GN=Ass1 PE=1 SV=1	46.6	5.04259e+07	4.74606e+07	4.48424e+07	3.31004e+06	2.96742e+06	2.55117e+06	1.15657e+08	120831293	8.8832e+07	2.56885e+06	3.13834e+06	1.69758e+06
O70274	Protein tyrosine phosphatase type IVA 2 OS=Mus musculus OX=10090 GN=Ptp4a2 PE=1 SV=1	19.1		1.25863e+06	20358.1	267101		185600	663708	550516	553830	291995	90235.7	1.06193e+06
P50544	Very long-chain specific acyl-CoA dehydrogenase, mitochondrial OS=Mus musculus OX=10090 GN=Acadvl PE=1 SV=3	70.8	1.53148e+06	4.60411e+06	2.43342e+06	5086890	2.60994e+06	7.63141e+06	2.72389e+06	2.8634e+06	3.1943e+06	1.94836e+06	2.18968e+06	1.6256e+06
Q06335	Amyloid-like protein 2 OS=Mus musculus OX=10090 GN=Aplp2 PE=1 SV=4	80.4							826503	442765	665132	173035	391971	519100
A6H8H2	DENN domain-containing protein 4C OS=Mus musculus OX=10090 GN=Dennd4c PE=1 SV=1	211.3							561983	658594	1.61761e+06	591826	412219	273859
Q8R1X6	Spartin OS=Mus musculus OX=10090 GN=Spart PE=1 SV=1	72.6					166652	222357					96733.9	139739
Q9CQZ5	NADH dehydrogenase [ubiquinone] 1 alpha subcomplex subunit 6 OS=Mus musculus OX=10090 GN=Ndufa6 PE=1 SV=1	15.3							1.01349e+06	962634	151574	335394	519222	126774
A2ATU0	Probable 2-oxoglutarate dehydrogenase E1 component DHKTD1, mitochondrial OS=Mus musculus OX=10090 GN=Dhtkd1 PE=1 SV=1	102.7	593195	462978	546802	287719	426087	439046	3.4923e+06	1.57735e+06	4.31123e+06	1.00178e+06	507282	772943
Q64127	Transcription intermediary factor 1-alpha OS=Mus musculus OX=10090 GN=Trim24 PE=1 SV=1	116.6	46915.1	100356					692767	868878	626421	151181	209536	50902.2
Q3TSG4	RNA demethylase ALKBH5 OS=Mus musculus OX=10090 GN=Alkbh5 PE=1 SV=2	44.4							78359.9	78385.9				65901.2
O35621	Phosphomannomutase 1 OS=Mus musculus OX=10090 GN=Pmm1 PE=1 SV=1	29.8	570071	347864	572206				9.59935e+06	1.4111e+07	6.98637e+06	236781	128222	44187.1
Q9DCC8	Mitochondrial import receptor subunit TOM20 homolog OS=Mus musculus OX=10090 GN=Tomm20 PE=1 SV=1	16.3	579961	1.02139e+06	1.21223e+06	127618	437780	260277	1.05374e+07	6.04523e+06	4.74158e+06	781864	619356	554403
Q61112	45 kDa calcium-binding protein OS=Mus musculus OX=10090 GN=Sdf4 PE=1 SV=1	42							560153	731844	616182	319323	220350	629648
E9QAG8	Zinc finger protein 431 OS=Mus musculus OX=10090 GN=Znf431 PE=1 SV=1	61.2	166863		232697				3.63167e+06	693739	3.87839e+06	108107	90687.6	338970
Q8CJG1	Protein argonaute-1 OS=Mus musculus OX=10090 GN=Ago1 PE=1 SV=2	97.2				209043	82639.9		190537		231925	1.20234e+06		625244
Q9ER00	Syntaxin-12 OS=Mus musculus OX=10090 GN=Stx12 PE=1 SV=1	31.2	3.62802e+06	1.86831e+06	1.50207e+06	8.78284e+06	8.1577e+06	7.5779e+06	3.62897e+06	3.34529e+06	2.90881e+06	6.10838e+06	2.68225e+06	4.95756e+06
Q8BL97	Serine/arginine-rich splicing factor 7 OS=Mus musculus OX=10090 GN=Srsf7 PE=1 SV=1	30.8	4.24155e+06	2.28351e+06	3.44903e+06	1.2679e+07	6.44877e+06	511929	2.00887e+06	1.67726e+06	435872	681745	389244	297232
P35279	Ras-related protein Rab-6A OS=Mus musculus OX=10090 GN=Rab6a PE=1 SV=4	23.6	122972	129237	173479	760920	884424	758270	642191	581142	1.18157e+06	1.81041e+06	1.2883e+06	1.49338e+06
Q8K0C1	Importin-13 OS=Mus musculus OX=10090 GN=Ipo13 PE=1 SV=1	108.2	398699		403465	415799	248024	126098	2.79705e+06	2.06253e+06	2.10319e+06	2.28755e+06	1.486e+06	1.10727e+06
Q91XC0	LIM domain-containing protein ajuba OS=Mus musculus OX=10090 GN=Ajuba PE=1 SV=1	57.9			60536.7				811648	1.70505e+06	2.48179e+06	296858	414020	398469
Q9D6N5	Dr1-associated corepressor OS=Mus musculus OX=10090 GN=Drap1 PE=1 SV=3	22.3	1.36313e+06	1.44612e+06	1.42546e+06	4.37631e+06	3.22855e+06	3678487	5.11926e+06	5.25634e+06	1.29314e+06	7.15957e+06	4.86578e+06	776184
O88735	Ensconsin OS=Mus musculus OX=10090 GN=Map7 PE=1 SV=1	82							230065	146830	250744	145155	87505.7	110352
Q8K2Q9	Shootin-1 OS=Mus musculus OX=10090 GN=Shtn1 PE=1 SV=1	71.3				515489	202956	73927.1				323832	109062	85843.6
Q8R0X2	CDK2-associated and cullin domain-containing protein 1 OS=Mus musculus OX=10090 GN=Cacul1 PE=2 SV=1	42.1		177432	321704				227969	296577	136066
P63054	Calmodulin regulator protein PCP4 OS=Mus musculus OX=10090 GN=Pcp4 PE=3 SV=2	6.8				2268010	661672	875024				1.21881e+06	479969	632076
Q8VIM9	Immunity-related GTPase family Q protein OS=Mus musculus OX=10090 GN=Irgq PE=1 SV=1	59.3	529736	230824	170663	4.41147e+06	5.95925e+06	3.75774e+06	531187	452762	540910	3.01294e+06	3.40785e+06	2.40485e+06
Q5XG71	Small subunit processome component 20 homolog OS=Mus musculus OX=10090 GN=Utp20 PE=1 SV=2	317.5	758330	476946	700512			133593	4.67483e+06	4.45806e+06	821233		548672
P11440	Cyclin-dependent kinase 1 OS=Mus musculus OX=10090 GN=Cdk1 PE=1 SV=3	34.1	7.2293e+06	7.91355e+06	6.26007e+06	1.88214e+06	2.57182e+06	2.90528e+06	3.36732e+07	3.91086e+07	3.05837e+07	2.35952e+06	5.24792e+06	5.08422e+06
Q91W86	Vacuolar protein sorting-associated protein 11 homolog OS=Mus musculus OX=10090 GN=Vps11 PE=1 SV=3	107.7							48648.7	38906.4	56809.3	36439.6		34847.4
Q9ER74	Sal-like protein 1 OS=Mus musculus OX=10090 GN=Sall1 PE=1 SV=1	140.1							1.07904e+06	959124	1.00788e+06		1880400	4.09215e+06
Q8R3Y8	Interferon regulatory factor 2-binding protein 1 OS=Mus musculus OX=10090 GN=Irf2bp1 PE=1 SV=2	61.7		155837				667119	1.19283e+06	1.13146e+06	1.81986e+06	1.40024e+06	575575	1.33834e+06
Q60809	CCR4-NOT transcription complex subunit 7 OS=Mus musculus OX=10090 GN=Cnot7 PE=1 SV=1	32.7								733593				224924
Q80XE1	Synembryn-B OS=Mus musculus OX=10090 GN=Ric8b PE=1 SV=2	58.6							156679	311205	286241	231446	105753	72463.1
Q9WV96	Mitochondrial import inner membrane translocase subunit Tim10 B OS=Mus musculus OX=10090 GN=Timm10b PE=1 SV=1	11.3							546486	681313	599447	353435	209352	382111
O70157	DNA topoisomerase 3-alpha OS=Mus musculus OX=10090 GN=Top3a PE=2 SV=1	112.3	336168					669533
Q8BHG1	Nardilysin OS=Mus musculus OX=10090 GN=Nrdc PE=1 SV=1	132.8	3.73201e+06	3.09234e+06	2.11435e+06	1.0472e+07	7.79913e+06	6.89589e+06	1.48834e+07	1.37579e+07	1.33535e+07	2.1048e+07	1.09944e+07	1.02314e+07
Q921E6	Polycomb protein EED OS=Mus musculus OX=10090 GN=Eed PE=1 SV=1	50.2	1.18293e+06	1.17237e+06	353913	137178		120319	1.15624e+07	9.58342e+06	5.9023e+06	169718	263739	255902
P01326	Insulin-2 OS=Mus musculus OX=10090 GN=Ins2 PE=1 SV=1	12.4	339774	371172	597806	559305	632882	1.5263e+06
O70372	Telomerase reverse transcriptase OS=Mus musculus OX=10090 GN=Tert PE=1 SV=1	127.9	578576	665514		337091	168834	356521
P28659	CUGBP Elav-like family member 1 OS=Mus musculus OX=10090 GN=Celf1 PE=1 SV=2	52.1	4.77515e+06	1.64722e+06	2.03578e+06	3.02168e+06	3.18433e+06	4.02046e+06	6.77027e+06	5.96869e+06	6.2811e+06	3.08248e+06	2.36467e+06	3.10132e+06
Q9D0D5	General transcription factor IIE subunit 1 OS=Mus musculus OX=10090 GN=Gtf2e1 PE=1 SV=1	49.6	1.23447e+06	1.16973e+06	1.12771e+06	625154	723692	1.36205e+06	4.54966e+06	6.19332e+06	4.99956e+06	551873	3.30486e+06	1.07254e+06
Q9WUN2	Serine/threonine-protein kinase TBK1 OS=Mus musculus OX=10090 GN=Tbk1 PE=1 SV=1	83.4									119987	62131
P17932	Putative 60S ribosomal protein L32' OS=Mus musculus OX=10090 GN=Rpl32-ps PE=5 SV=2	16			140849				320912	19652.3	517640	14552.9	8120.81	197466
Q3UFF7	Lysophospholipase-like protein 1 OS=Mus musculus OX=10090 GN=Lyplal1 PE=1 SV=3	26.3				190920		207361	192683	204216	388294	585870	595123	828285
Q8BTZ4	Anaphase-promoting complex subunit 5 OS=Mus musculus OX=10090 GN=Anapc5 PE=1 SV=1	83						151790	240636	717913	634576	558811	237660	1.10697e+06
Q8R3Q2	Serine/threonine-protein phosphatase 6 regulatory subunit 2 OS=Mus musculus OX=10090 GN=Ppp6r2 PE=1 SV=1	100.4				341407	472937	168619				276433	283982	95013.3
Q9DBL1	Short/branched chain specific acyl-CoA dehydrogenase, mitochondrial OS=Mus musculus OX=10090 GN=Acadsb PE=1 SV=1	47.8	224102	279410	385105	2.23439e+06	3.24101e+06	2.08132e+06	253298		827990	595841	220506	764908
Q9D906	Ubiquitin-like modifier-activating enzyme ATG7 OS=Mus musculus OX=10090 GN=Atg7 PE=1 SV=1	77.5	230533	298403	333182	3.41875e+06	3.38937e+06	1.42978e+06	388831	292941	202069	1.83701e+06	635240	508570
Q99LE6	ATP-binding cassette sub-family F member 2 OS=Mus musculus OX=10090 GN=Abcf2 PE=1 SV=1	71.7	3.85694e+06	4.6248e+06	4.43024e+06	703378	1.70807e+06	1.89263e+06	2.45341e+07	2.94437e+07	2.56808e+07	2.163e+06	3.41896e+06	2.56315e+06
Q8K2V1	Serine/threonine-protein phosphatase 4 regulatory subunit 1 OS=Mus musculus OX=10090 GN=Ppp4r1 PE=1 SV=2	106.2	3.16783e+06	2.05441e+06	4.19508e+06	1.45753e+06	1.77479e+06	1.45212e+06	5.60923e+06	5.65934e+06	6.04405e+06	1.02751e+06	1.04494e+06	858854
Q3TIU4	2',5'-phosphodiesterase 12 OS=Mus musculus OX=10090 GN=Pde12 PE=1 SV=2	67.5			490895				511178	741911	827346	446186		75747.1
Q9CQT5	Proteasome maturation protein OS=Mus musculus OX=10090 GN=Pomp PE=1 SV=1	15.8	598165			220100			1.83275e+06	1270590	2.5451e+06	573706	554079	444431
Q9D2V8	Major facilitator superfamily domain-containing protein 10 OS=Mus musculus OX=10090 GN=Mfsd10 PE=1 SV=1	49.3	46779.7	31815.3	46735		72628.3	69469.3	130732	100685	137490	106531	57839.9
Q8R366	Immunoglobulin superfamily member 8 OS=Mus musculus OX=10090 GN=Igsf8 PE=1 SV=2	65		51114.7	129531	636014	819716	595377			29068	55078.9	204034	184920
O09044	Synaptosomal-associated protein 23 OS=Mus musculus OX=10090 GN=Snap23 PE=1 SV=1	23.2	897583	1.37577e+06	822083	569183	202424	121938	3.2587e+06	3.64587e+06	3.00504e+06	559991	103877	291003
Q8CDM8	Protein FAM160B1 OS=Mus musculus OX=10090 GN=Fam160b1 PE=1 SV=2	86							934635	443409	733989	557038	213473	289810
Q9WUQ2	Prolactin regulatory element-binding protein OS=Mus musculus OX=10090 GN=Preb PE=1 SV=1	45.4	72781.7	105349	102312		270745	229103	664222	759216	624927	191442	240617	309151
Q99N87	28S ribosomal protein S5, mitochondrial OS=Mus musculus OX=10090 GN=Mrps5 PE=1 SV=1	48.2	858870	1807633	687903			98661.7	3.24933e+06	2.78216e+06	1.60456e+06			55912.3
Q62384	Zinc finger protein ZPR1 OS=Mus musculus OX=10090 GN=Zpr1 PE=1 SV=1	50.7	4.83858e+06	1.13444e+06	7.03828e+06	901213	1.36263e+06	1.48186e+06	8.71782e+06	1.03163e+07	1.24511e+07	712930	1.40571e+06	1.76799e+06
Q9D1E6	Tubulin-folding cofactor B OS=Mus musculus OX=10090 GN=Tbcb PE=1 SV=2	27.4	4.38463e+06	3.12054e+06	3.9421e+06	7.6948e+06	8.80706e+06	5.68568e+06	1.78479e+07	1.8954e+07	18397038	11021659	1.68478e+07	8.00037e+06
Q8BM39	Pre-mRNA-splicing factor 18 OS=Mus musculus OX=10090 GN=Prpf18 PE=1 SV=1	39.9							165484	227594			73299.3	55563.3
Q9QYB8	Beta-adducin OS=Mus musculus OX=10090 GN=Add2 PE=1 SV=4	80.6			141230	5.86247e+06	3.40323e+06	2.76373e+06	72621.3		66182	3.37463e+06	1.74383e+06	1.79488e+06
Q689Z5	Protein strawberry notch homolog 1 OS=Mus musculus OX=10090 GN=Sbno1 PE=1 SV=2	153.6	355152		478063		170606		5.35259e+06	7.07159e+06	3.95678e+06	164306	1.05374e+06	596196
Q8BFZ3	Beta-actin-like protein 2 OS=Mus musculus OX=10090 GN=Actbl2 PE=1 SV=1	42	673328	599519	411204	2.67514e+06	1.93406e+06	1.5957e+06	627279	992837	957394	1.75926e+06	997540	556091
Q9D924	Iron-sulfur cluster assembly 1 homolog, mitochondrial OS=Mus musculus OX=10090 GN=Isca1 PE=2 SV=1	14.2							167788	262368	130120	218913		220086
Q9QXK7	Cleavage and polyadenylation specificity factor subunit 3 OS=Mus musculus OX=10090 GN=Cpsf3 PE=1 SV=2	77.5	439553	753612	254228	553175	1.42741e+06	435542	5.64645e+06	4.83617e+06	1.07478e+06	2.12256e+06	1.3634e+06	1.33346e+06
Q8C129	Leucyl-cystinyl aminopeptidase OS=Mus musculus OX=10090 GN=Lnpep PE=1 SV=1	117.2	55608.6		104861		247894	462524	306014	207966	937275	368932	534460	261048
P28663	Beta-soluble NSF attachment protein OS=Mus musculus OX=10090 GN=Napb PE=1 SV=2	33.5	170429	183162		3.08915e+06	1.43062e+06	1.66068e+06	98345.3	139359	69775.1	1.34559e+06	699916	939815
P51410	60S ribosomal protein L9 OS=Mus musculus OX=10090 GN=Rpl9 PE=2 SV=2	21.9	3.74963e+07	3.47701e+07	4.21331e+07	3.13542e+07	4.17607e+07	4.6374e+07	8.45503e+07	8.56635e+07	9.00983e+07	2.94372e+07	2.58495e+07	3.01517e+07
Q99P31	Hsp70-binding protein 1 OS=Mus musculus OX=10090 GN=Hspbp1 PE=1 SV=1	39.1	1.69809e+06	1.48318e+06	1.67201e+06	1.15212e+06	2.36405e+06	2.47097e+06	7.82496e+06	6.11992e+06	5.86098e+06	2.66248e+06	3.03979e+06	1.75792e+06
Q62420	Endophilin-A1 OS=Mus musculus OX=10090 GN=Sh3gl2 PE=1 SV=2	39.9	140357	507111		367715		750025	813623	399914	984568	300452	149115	1.43586e+06
Q3TC93	HCLS1-binding protein 3 OS=Mus musculus OX=10090 GN=Hs1bp3 PE=1 SV=2	43.7		95427.5	116171	358578	1.00791e+06	1.15129e+06	1.62697e+07	1.09706e+07	1.51812e+07	115870512	6.53204e+07	4.17601e+07
Q9JI11	Serine/threonine-protein kinase 4 OS=Mus musculus OX=10090 GN=Stk4 PE=1 SV=1	55.5							61269.2	52820.2	87272	54569.9		44293.3
P61294	Ras-related protein Rab-6B OS=Mus musculus OX=10090 GN=Rab6b PE=1 SV=1	23.4	1.7266e+06	2.41695e+06	2.4209e+06	1.15794e+07	9.31456e+06	7.57006e+06	6.04922e+06	8.22828e+06	6.3311e+06	1.3952e+07	7.63812e+06	7.3921e+06
Q91YE7	RNA-binding protein 5 OS=Mus musculus OX=10090 GN=Rbm5 PE=1 SV=1	92.3	248771	295458					782481	941241
Q99NF8	Ran-binding protein 17 OS=Mus musculus OX=10090 GN=Ranbp17 PE=1 SV=1	124	220873	371735	313336		160961	84485.7	592137	1.39714e+06	786682	90449.8	150591
P59325	Eukaryotic translation initiation factor 5 OS=Mus musculus OX=10090 GN=Eif5 PE=1 SV=1	48.9	5.6268e+06	5.34869e+06	4.02879e+06	1.63118e+07	1.34915e+07	1.11285e+07	1.21792e+07	1.31112e+07	1.26574e+07	1.09183e+07	1.11867e+07	1.01206e+07
Q14AI6	Mitochondrial mRNA pseudouridine synthase Rpusd3 OS=Mus musculus OX=10090 GN=Rpusd3 PE=2 SV=1	38.1							138744	120568	78661.9	93709.9		102135
Q61205	Platelet-activating factor acetylhydrolase IB subunit gamma OS=Mus musculus OX=10090 GN=Pafah1b3 PE=1 SV=1	25.8	7.9119e+06	1.08638e+07	1.6459e+06	6.24027e+07	4.59509e+07	4.97654e+07	5.33433e+06	4.45781e+06	6.79611e+06	2.27673e+07	1.15665e+07	1.85842e+07
P42669	Transcriptional activator protein Pur-alpha OS=Mus musculus OX=10090 GN=Pura PE=1 SV=1	34.9	98987.9		286211		116654	193926	492193	413311	612241	146095	171264	180452
Q91ZX7	Prolow-density lipoprotein receptor-related protein 1 OS=Mus musculus OX=10090 GN=Lrp1 PE=1 SV=1	504.4	303057	310734	56281.1	8.52363e+06	5.48631e+06	5.04106e+06	607729	779075	1.46511e+06	1.35394e+07	7.65471e+06	8.82172e+06
P31266	Recombining binding protein suppressor of hairless OS=Mus musculus OX=10090 GN=Rbpj PE=1 SV=1	58.5	2.44913e+06	1.49404e+06	1.11247e+06	213742	318031	473296	1.10354e+07	1.1696e+07	1.08856e+07	327508	920869	1.08188e+06
Q6ZQK5	Arf-GAP with coiled-coil, ANK repeat and PH domain-containing protein 2 OS=Mus musculus OX=10090 GN=Acap2 PE=1 SV=2	87.2							91237.8	96010.2	232104		183103	87677.1
Q8R242	Di-N-acetylchitobiase OS=Mus musculus OX=10090 GN=Ctbs PE=1 SV=2	41.3			110463		83525.2	86920.5
Q8BHR2	Ecto-NOX disulfide-thiol exchanger 1 OS=Mus musculus OX=10090 GN=Enox1 PE=2 SV=1	73.2	5.20123e+06	6.97118e+06	3.53255e+06	1.00669e+06	1.373e+06	658345	204328	179356	212604
Q8BK58	HSPB1-associated protein 1 OS=Mus musculus OX=10090 GN=Hspbap1 PE=1 SV=2	54.4	2.844e+06	1.67666e+06	2.48703e+06		729841	269399	8.97524e+06	1.19834e+07	7.34208e+06	839561	31141.9	254409
Q9Z2D0	Myotubularin-related protein 9 OS=Mus musculus OX=10090 GN=Mtmr9 PE=1 SV=2	62.9							361756	1.64649e+06	515685	460293	250603	276296
P14069	Protein S100-A6 OS=Mus musculus OX=10090 GN=S100a6 PE=1 SV=3	10	789715	619751	110725	455356	867142	199894	4873406	4.28878e+06	626277	1.02059e+06	1.83116e+06	294009
Q99N84	28S ribosomal protein S18b, mitochondrial OS=Mus musculus OX=10090 GN=Mrps18b PE=1 SV=1	28.7	306686	82178.2	304325				1.28936e+06	615833	1.36038e+06			79969
Q99J62	Replication factor C subunit 4 OS=Mus musculus OX=10090 GN=Rfc4 PE=1 SV=1	39.8	1.20149e+06	3.294e+06	2.31676e+06	471914	985080	948347	6.38939e+06	1.66153e+07	4.75363e+06	280750	1.91523e+06	1.28127e+06
Q80TP3	E3 ubiquitin-protein ligase UBR5 OS=Mus musculus OX=10090 GN=Ubr5 PE=1 SV=2	308.2							4.41647e+06	5.33688e+06	2.65047e+06	1.72539e+06	1.71595e+06	1.81e+06
P83940	Elongin-C OS=Mus musculus OX=10090 GN=Eloc PE=1 SV=1	12.5	3.63978e+06	4.42848e+06	4.03208e+06	2.24466e+07	1.27371e+07	1.16348e+07	1.17066e+07	3.53511e+07	1.57729e+07	6.17738e+07	2.61693e+07	5.81546e+06
Q03145	Ephrin type-A receptor 2 OS=Mus musculus OX=10090 GN=Epha2 PE=1 SV=3	108.8	1.45328e+06	1.34965e+06	1.09833e+06	1.04243e+06	524304	837751	1.17496e+07	1.40936e+07	1.45961e+07	3.32108e+06	1.88485e+06	2.30869e+06
Q9CZV5	STAGA complex 65 subunit gamma OS=Mus musculus OX=10090 GN=Supt7l PE=1 SV=1	45.9									38373.5
P16110	Galectin-3 OS=Mus musculus OX=10090 GN=Lgals3 PE=1 SV=3	27.5	1.93171e+06	2.6229e+06	2.57163e+06			192928	5.59528e+06	6.5729e+06	6.14894e+06	156203
P45481	CREB-binding protein OS=Mus musculus OX=10090 GN=Crebbp PE=1 SV=3	265.3							184768	65918.9	216418	141145		174702
Q8R349	Cell division cycle protein 16 homolog OS=Mus musculus OX=10090 GN=Cdc16 PE=1 SV=1	71.4	1.10424e+06	1.09548e+06	609161	4.91361e+06	3.61663e+06	6.0046e+06	1.14481e+06	935483	1.47588e+06	1.99869e+06	1.54371e+06	2.04073e+06
Q9ES28	Rho guanine nucleotide exchange factor 7 OS=Mus musculus OX=10090 GN=Arhgef7 PE=1 SV=2	97	1.03843e+06	281960	659849	1.00519e+07	6.21857e+06	5.87359e+06	3.00311e+06	1.86858e+06	2.69976e+06	1.12533e+07	7.38656e+06	9.52535e+06
Q9JI90	E3 ubiquitin-protein ligase RNF14 OS=Mus musculus OX=10090 GN=Rnf14 PE=1 SV=2	54.9				445541		276744	361786		347917	904440	584978	319092
O35114	Lysosome membrane protein 2 OS=Mus musculus OX=10090 GN=Scarb2 PE=1 SV=3	54	472926	293117	249246	3.64406e+06		1.86037e+06	3.80348e+06	3.40135e+06	4.24269e+06	3.40245e+06	802236	1.54029e+06
Q8VDQ1	Prostaglandin reductase 2 OS=Mus musculus OX=10090 GN=Ptgr2 PE=1 SV=2	38	219575	327374	479511	684232	381484	468067	1.83703e+06	885747	1.73439e+06	980240	314696	882225
O54946	DnaJ homolog subfamily B member 6 OS=Mus musculus OX=10090 GN=Dnajb6 PE=1 SV=4	39.8	2.57974e+06	211423	270045	4.18893e+06	2.85128e+06		3.98033e+06	4.21083e+06	2.91277e+06	1.61788e+06	1.40766e+06	687000
Q9EP69	Phosphatidylinositide phosphatase SAC1 OS=Mus musculus OX=10090 GN=Sacm1l PE=1 SV=1	66.9	417110	128108	803823	1.51034e+06	1.60867e+06	1.70636e+06	3.09202e+06	2.12818e+06	2.43327e+06	4.18107e+06	3.34496e+06	3.00044e+06
Q9D2C2	Protein SAAL1 OS=Mus musculus OX=10090 GN=Saal1 PE=1 SV=1	52.7	946007	224017	4.98795e+06	2.65383e+06	2.17327e+06	2.78175e+06	1.88039e+06	1.64048e+06	1.92553e+06	1.46411e+06	1.43445e+06	1.15955e+06
Q9WV80	Sorting nexin-1 OS=Mus musculus OX=10090 GN=Snx1 PE=1 SV=1	58.9	4.49635e+06	5.70532e+06	5.44085e+06	1.71616e+07	3.39223e+07	1.83169e+07	2.3883e+06	2.61634e+06	3.0539e+06	2.39786e+06	4.82649e+06	3.40163e+06
Q8BXK8	Arf-GAP with GTPase, ANK repeat and PH domain-containing protein 1 OS=Mus musculus OX=10090 GN=Agap1 PE=1 SV=1	94.4		49093.3		328184	392698	213935		38732.3	100116	431645	93711	288432
Q9D7S7	60S ribosomal protein L22-like 1 OS=Mus musculus OX=10090 GN=Rpl22l1 PE=1 SV=1	14.5	5.10308e+06	3.65356e+06	5.52534e+06	2.66332e+06	1.36286e+06	3.5825e+06	1.40909e+07	15391410	1.47177e+07	3.86858e+06	1.97268e+06	1.40713e+06
Q8CFI0	E3 ubiquitin-protein ligase NEDD4-like OS=Mus musculus OX=10090 GN=Nedd4l PE=1 SV=2	115.3		9900.66		11496.1		53504.8
Q8BZQ7	Anaphase-promoting complex subunit 2 OS=Mus musculus OX=10090 GN=Anapc2 PE=1 SV=2	95.2	120910	447864	73619.5	1.18126e+06	1.18379e+06	923147	1.02455e+06	441641	684912	1.0768e+06	1.63891e+06	1.5099e+06
Q8R418	Endoribonuclease Dicer OS=Mus musculus OX=10090 GN=Dicer1 PE=1 SV=3	216.7	110783		390617	70744.6		325444	399081	1.22919e+06	670727	549517	195611	50575.2
Q80ZQ9	Protein Simiate OS=Mus musculus OX=10090 GN=Fam206a PE=1 SV=2	21.6			38223.4		31296.1	90602.1
Q0VBL3	RNA-binding protein 15 OS=Mus musculus OX=10090 GN=Rbm15 PE=1 SV=1	105.7	728580	583800				190551	568825	587988
P11404	Fatty acid-binding protein, heart OS=Mus musculus OX=10090 GN=Fabp3 PE=1 SV=5	14.8	2.91167e+06	3.00584e+06	1.72554e+06	4.92537e+06	7.50224e+06	5.70644e+06	2.78158e+06	2.61516e+06	3.15537e+06	1.08895e+06	3.54245e+06	2.1504e+06
P10923	Osteopontin OS=Mus musculus OX=10090 GN=Spp1 PE=1 SV=1	32.4									33405.3
Q9D7N9	Adipocyte plasma membrane-associated protein OS=Mus musculus OX=10090 GN=Apmap PE=1 SV=1	46.4	382452	411464	645474	2.3068e+06	2.78759e+06	2.07702e+06	332232	361973	408763	460581	758069	469669
Q7TMY7	Importin-8 OS=Mus musculus OX=10090 GN=Ipo8 PE=1 SV=3	117			1.09641e+06				885085	1.64703e+06	1.57884e+06	374320	372363
P13595	Neural cell adhesion molecule 1 OS=Mus musculus OX=10090 GN=Ncam1 PE=1 SV=3	119.4	1.35403e+06	1.98892e+06	2.03325e+06	1.0558e+08	5.04763e+07	4.27873e+07	2.25663e+06	2.53944e+06	3.41358e+06	4.98276e+07	2.09103e+07	1.97181e+07
Q9QYY0	GRB2-associated-binding protein 1 OS=Mus musculus OX=10090 GN=Gab1 PE=1 SV=2	76.8		74914.4	130216				3.87444e+06	4.00464e+06	3.97699e+06	286399	257129	666907
O08901	Mitotic checkpoint serine/threonine-protein kinase BUB1 OS=Mus musculus OX=10090 GN=Bub1 PE=1 SV=1	119.5							1.53159e+06	1.59664e+06	690898	416932	1.34966e+06	327117
Q8BIH0	Histone deacetylase complex subunit SAP130 OS=Mus musculus OX=10090 GN=Sap130 PE=1 SV=2	111.2	78186.1	87347.5	19377.5			50253.2	831124	877363	46968.7	56790.8	118077
D3YXK2	Scaffold attachment factor B1 OS=Mus musculus OX=10090 GN=Safb PE=1 SV=2	105	610033	440469	602458	496372	189662	499768	1.79701e+06	1.84375e+06	619128	244971	127849	469497
P30999	Catenin delta-1 OS=Mus musculus OX=10090 GN=Ctnnd1 PE=1 SV=2	104.9	3.12448e+06	2.01559e+06	3.43336e+06	3.15439e+06	2.65104e+06	3.12931e+06	2.5063e+07	2.31812e+07	21415037	9.19577e+06	6.71903e+06	6.00863e+06
Q61735	Leukocyte surface antigen CD47 OS=Mus musculus OX=10090 GN=Cd47 PE=1 SV=2	33.1	126232	114319		1.88147e+06	1.37999e+06	1.16465e+06	135344		154824	1.02509e+06	512176	497786
A2AN08	E3 ubiquitin-protein ligase UBR4 OS=Mus musculus OX=10090 GN=Ubr4 PE=1 SV=1	571.9	1.00144e+07	1.19229e+07	9.02549e+06	1.75749e+07	1.59646e+07	1.27049e+07	5.01377e+07	4.34557e+07	3.22506e+07	1.77638e+07	2.80596e+07	1.14183e+07
Q5FWI3	Cell surface hyaluronidase OS=Mus musculus OX=10090 GN=Cemip2 PE=1 SV=1	153.7	101494	389599	647102	810186	177148	367136	1.36049e+06	1.44745e+06	1.56581e+06	818240	687311	276422
Q9ESV0	ATP-dependent RNA helicase DDX24 OS=Mus musculus OX=10090 GN=Ddx24 PE=1 SV=2	96.4							1.15513e+06	1.30637e+06	825396	283451	519260	637592
P62814	V-type proton ATPase subunit B, brain isoform OS=Mus musculus OX=10090 GN=Atp6v1b2 PE=1 SV=1	56.5	2.52276e+07	2.79722e+07	9.57335e+06	6.62913e+07	7.08674e+07	6.07368e+07	1.98836e+07	2.55204e+07	2.12186e+07	2.59939e+07	2.46848e+07	1.73172e+07
Q9CY50	Translocon-associated protein subunit alpha OS=Mus musculus OX=10090 GN=Ssr1 PE=1 SV=1	32	921901	768567	1.43134e+06	1.12577e+06	1.22549e+06	1.96544e+06	6.01253e+06	4.33005e+06	4.47584e+06	1.83194e+06	2.4594e+06	1.63833e+06
Q9JIH2	Nuclear pore complex protein Nup50 OS=Mus musculus OX=10090 GN=Nup50 PE=1 SV=3	49.5	2.20621e+06	1.79041e+06	1.2128e+06	419619	1.11913e+06	1.05182e+06	8.13289e+06	7.94925e+06	3.24279e+06	630514	513904	1.5783e+06
Q8CGC6	RNA-binding protein 28 OS=Mus musculus OX=10090 GN=Rbm28 PE=1 SV=4	84.2							107955	48446.6	82794.5		198909
Q8K221	Arfaptin-2 OS=Mus musculus OX=10090 GN=Arfip2 PE=1 SV=2	37.7		274253	267786	557239	949983	541690	945095	988155	690396	1.66664e+06	1.79334e+06	1.85486e+06
Q9QXG2	Rab proteins geranylgeranyltransferase component A 1 OS=Mus musculus OX=10090 GN=Chm PE=1 SV=1	73.9									61267.5
Q8CFE4	SCY1-like protein 2 OS=Mus musculus OX=10090 GN=Scyl2 PE=1 SV=1	103.3	492182	388711	404487	3.67257e+06	3.21267e+06	2.17729e+06	2.41464e+06	2.36466e+06	1.48089e+06	5.57261e+06	3.39064e+06	3.44933e+06
Q5EG47	5'-AMP-activated protein kinase catalytic subunit alpha-1 OS=Mus musculus OX=10090 GN=Prkaa1 PE=1 SV=2	63.9	3.0143e+06	2.87954e+06	5.55474e+06	2.17021e+06	2.5989e+06	2.56064e+06	1.85278e+06	1.99432e+06	1.23196e+06	505027	538341	115974
Q9CPT4	Myeloid-derived growth factor OS=Mus musculus OX=10090 GN=Mydgf PE=1 SV=1	18	767968	798227	942388	6.944e+06	1.09761e+07	7.4696e+06	2.58202e+06	3.61645e+06	3.06757e+06	1.85572e+06	1.51558e+08	2.30968e+06
Q8BP27	Swi5-dependent recombination DNA repair protein 1 homolog OS=Mus musculus OX=10090 GN=Sfr1 PE=1 SV=2	35.2	1.41934e+06	2.2951e+06	2.54851e+06	2.03285e+06	2.04067e+06	1.49462e+06	1.62851e+07	1.75124e+07	1.99114e+07	4.55579e+06	2.90268e+06	7.29664e+06
Q3TFD2	Lysophosphatidylcholine acyltransferase 1 OS=Mus musculus OX=10090 GN=Lpcat1 PE=1 SV=1	59.7	1.18163e+06	1.61669e+06	259738	800111	1.74879e+06	1.04347e+06	1.95119e+06	2.48649e+06	2.59885e+06	342660	3.62669e+06	677002
Q8VC85	U6 snRNA-associated Sm-like protein LSm1 OS=Mus musculus OX=10090 GN=Lsm1 PE=1 SV=1	15.2			3.31014e+06				574927	631353	906907		484663
P97314	Cysteine and glycine-rich protein 2 OS=Mus musculus OX=10090 GN=Csrp2 PE=1 SV=3	20.9	517249	1.17748e+06	550411	519329	362894	898750	5.35262e+06	4.7005e+06	4.39967e+06	904103	934893	1.47449e+06
Q8BP71	RNA binding protein fox-1 homolog 2 OS=Mus musculus OX=10090 GN=Rbfox2 PE=1 SV=2	47.3							850154	959518	471637	348343	136120	575640
Q9EQW7	Kinesin-like protein KIF13A OS=Mus musculus OX=10090 GN=Kif13a PE=1 SV=1	195.7	187200	122289	213433	224970	222113	198833	682388	722242	693166	217393	251505	280828
O35488	Very long-chain acyl-CoA synthetase OS=Mus musculus OX=10090 GN=Slc27a2 PE=1 SV=2	70.4							470998	1.01346e+06	953726	210037	574840	254898
Q61140	Breast cancer anti-estrogen resistance protein 1 OS=Mus musculus OX=10090 GN=Bcar1 PE=1 SV=2	94.2							1.66508e+06		285154	289770		163244
Q8R3F9	Speckle targeted PIP5K1A-regulated poly(A) polymerase OS=Mus musculus OX=10090 GN=Tut1 PE=1 SV=1	94.5	955827	951545	644378	194098	288580	495532	7.6276e+06	8.27814e+06	6.73267e+06	508297	1.59837e+06	545465
Q8BHY2	Nucleolar complex protein 4 homolog OS=Mus musculus OX=10090 GN=Noc4l PE=2 SV=1	58.6	1.32736e+06	848096	115169				2.39874e+06	1.69202e+06	963859
Q9QUJ7	Long-chain-fatty-acid--CoA ligase 4 OS=Mus musculus OX=10090 GN=Acsl4 PE=1 SV=2	79	260267	1.3013e+06	1.87899e+06	2.16299e+06	619383	1.56719e+06	2.91618e+06	2.70733e+06	1.00605e+06	2.65128e+06	494613	436077
Q9Z315	U4/U6.U5 tri-snRNP-associated protein 1 OS=Mus musculus OX=10090 GN=Sart1 PE=1 SV=1	90.8	924460	533388	1.54236e+06	739284	340631	518370	7.94504e+06	8.65434e+06	7.96546e+06	1.82563e+06	430556	2.58662e+06
P32233	Developmentally-regulated GTP-binding protein 1 OS=Mus musculus OX=10090 GN=Drg1 PE=1 SV=1	40.5	5.21421e+06	6.10057e+06	4.20451e+06	3.21832e+06	5.52846e+06	4.96714e+06	1.74306e+07	1.61721e+07	1.69773e+07	4.19457e+06	4.71799e+06	3.42838e+06
Q9R078	5'-AMP-activated protein kinase subunit beta-1 OS=Mus musculus OX=10090 GN=Prkab1 PE=1 SV=2	30.3			72251.8	106622	66841.9
Q9ESZ8	General transcription factor II-I OS=Mus musculus OX=10090 GN=Gtf2i PE=1 SV=3	112.2	2.40492e+06	2.6903e+06	908429	3.18708e+06	3.9651e+06	4.18602e+06	1.29945e+07	1.55463e+07	5.47515e+06	4.87983e+06	6.44038e+06	6.77831e+06
Q80TR8	DDB1- and CUL4-associated factor 1 OS=Mus musculus OX=10090 GN=Dcaf1 PE=1 SV=4	168.8	458406	2.47163e+06	1.01775e+06	199140	196014	486048	6.25173e+06	3.28732e+06	4.52731e+06	287976	532689	212800
Q8BFW7	Lipoma-preferred partner homolog OS=Mus musculus OX=10090 GN=Lpp PE=1 SV=1	65.8							246711	161855	341224	37136.9	77351.9	294256
P23249	Putative helicase MOV-10 OS=Mus musculus OX=10090 GN=Mov10 PE=1 SV=2	113.5	2.71261e+06	2.75969e+06	2.7228e+06	377532	586580	1.89726e+06	2.23464e+07	2.80331e+07	2.40538e+07	6.6376e+06	987634	998733
Q80TY0	Formin-binding protein 1 OS=Mus musculus OX=10090 GN=Fnbp1 PE=1 SV=2	71.3							571985	491423	637716	132111	173376	498933
O88668	Protein CREG1 OS=Mus musculus OX=10090 GN=Creg1 PE=1 SV=1	24.4	1.01128e+06				223860	1.74036e+06	85988	74906.2	91266.5	95245.8	85965.2	104578
Q8VDF2	E3 ubiquitin-protein ligase UHRF1 OS=Mus musculus OX=10090 GN=Uhrf1 PE=1 SV=2	88.2	106224	107368	411067			101667	2.09037e+07	2.54265e+07	1.6075e+06	278527	614285	516465
Q62245	Son of sevenless homolog 1 OS=Mus musculus OX=10090 GN=Sos1 PE=1 SV=2	150.8	683084	556120	915127	1.06492e+06	844404	1.17524e+06	103657	79175.4	509596	217091	102626
P53569	CCAAT/enhancer-binding protein zeta OS=Mus musculus OX=10090 GN=Cebpz PE=1 SV=2	120.2							101228	158789			185329
Q07133	Histone H1t OS=Mus musculus OX=10090 GN=Hist1h1t PE=1 SV=4	21.5									55353.9
Q05512	Serine/threonine-protein kinase MARK2 OS=Mus musculus OX=10090 GN=Mark2 PE=1 SV=3	86.3							569932	558880	438360	173148	253605	195039
Q8K2I1	Protein farnesyltransferase subunit beta OS=Mus musculus OX=10090 GN=Fntb PE=1 SV=1	48.8	437114	340547	634508	3.72282e+06	3.23326e+06	2.02256e+06	1.30202e+06	1.49e+06	1.06225e+06	3.57099e+06	2.32359e+06	1.30594e+06
Q8C0V0	Serine/threonine-protein kinase tousled-like 1 OS=Mus musculus OX=10090 GN=Tlk1 PE=1 SV=2	86.6				40488	65961.6		68654.5	140927	54956.2	72672.9	92339.2	57838.5
Q8BJ71	Nuclear pore complex protein Nup93 OS=Mus musculus OX=10090 GN=Nup93 PE=1 SV=1	93.2	7.72717e+06	9.66242e+06	1.77046e+06	2.32977e+06	1.9541e+06	1362538	3.09899e+07	4.04614e+07	1.75901e+07	3.07574e+06	2.89311e+06	2.36775e+06
O55222	Integrin-linked protein kinase OS=Mus musculus OX=10090 GN=Ilk PE=1 SV=2	51.3	364597	375646	348023	1.10097e+06	1.27144e+06	2.55799e+06	1.41144e+06	1.68705e+06	809453	1.1751e+06	1.32745e+06	1.85916e+06
Q62018	RNA polymerase-associated protein CTR9 homolog OS=Mus musculus OX=10090 GN=Ctr9 PE=1 SV=2	133.3	321336	248722	175579	16803.6		140594	1.7252e+06	2.2393e+06	1.53445e+06		45498.2	501897
Q8CCN5	Breast carcinoma-amplified sequence 3 homolog OS=Mus musculus OX=10090 GN=Bcas3 PE=1 SV=2	101	56745.7	138079	184908				353980	569156	550905	45310.6
P68510	14-3-3 protein eta OS=Mus musculus OX=10090 GN=Ywhah PE=1 SV=2	28.2	1.29369e+07	1.44344e+07	1.86711e+07	7.72975e+07	4.83665e+07	5.54037e+07	2.21769e+07	2.31898e+07	5.87532e+07	4.97438e+07	2.50208e+07	2.84743e+07
Q8BQ47	Protein canopy homolog 4 OS=Mus musculus OX=10090 GN=Cnpy4 PE=1 SV=1	28.1	445344	322595	258028	5895197	3.31698e+06	3.97079e+06		334020	383382	344310	439978	738948
P46935	E3 ubiquitin-protein ligase NEDD4 OS=Mus musculus OX=10090 GN=Nedd4 PE=1 SV=3	102.6	6.78981e+06	7.47462e+06	7.83885e+06	1.32866e+07	1.66858e+07	1.37337e+07	9.63637e+07	1.00124e+08	1.04107e+08	5.15609e+07	5.84866e+07	4.98195e+07
Q7TMK6	Protein Hook homolog 2 OS=Mus musculus OX=10090 GN=Hook2 PE=1 SV=3	83.3	146854		136284				3.0741e+06	3.60415e+06	1.69345e+06	90514.6	526619	115341
Q9DC63	F-box only protein 3 OS=Mus musculus OX=10090 GN=Fbxo3 PE=1 SV=1	55.2							131818	244947	234118		202201	175160
P70313	Nitric oxide synthase, endothelial OS=Mus musculus OX=10090 GN=Nos3 PE=1 SV=4	132.8							73734.3
O08807	Peroxiredoxin-4 OS=Mus musculus OX=10090 GN=Prdx4 PE=1 SV=1	31	4.65131e+06	3.94676e+06	3.29799e+06	1.83668e+07	2.50612e+07	1.94941e+07	3.23898e+06	5.22569e+06	2.74353e+06	3.36826e+06	8315916	4.73655e+06
P52293	Importin subunit alpha-1 OS=Mus musculus OX=10090 GN=Kpna2 PE=1 SV=2	57.9	1.15663e+07	1.51475e+07	1.32078e+07	676232	1.53637e+06	2.71049e+06	1.66084e+08	1.70681e+08	1.17623e+08	1.98354e+06	5.7671e+06	6.82765e+06
Q80X50	Ubiquitin-associated protein 2-like OS=Mus musculus OX=10090 GN=Ubap2l PE=1 SV=1	116.7	3.29616e+06	3.5236e+06	3.64543e+06	7.79034e+06	7.87003e+06	7.85198e+06	1.11008e+07	1.39213e+07	1.4183e+07	8.73302e+06	5.55709e+06	9.84186e+06
Q9CQ36	DNA polymerase epsilon subunit 4 OS=Mus musculus OX=10090 GN=Pole4 PE=1 SV=1	12.2							163921	173142	221446		310061	109693
Q76MZ3	Serine/threonine-protein phosphatase 2A 65 kDa regulatory subunit A alpha isoform OS=Mus musculus OX=10090 GN=Ppp2r1a PE=1 SV=3	65.3	3.91289e+07	4.00234e+07	3.94818e+07	1.3724e+08	1.15445e+08	1.07116e+08	9.65444e+07	1.1909e+08	8.08429e+07	9.86975e+07	7.25039e+07	6.73682e+07
Q8K3X4	Interferon regulatory factor 2-binding protein-like OS=Mus musculus OX=10090 GN=Irf2bpl PE=1 SV=1	80.5	911519	452410	775696	995713	1.26099e+06	1.41619e+06	9.25944e+06	8.76181e+06	7.51945e+06	4.77095e+06	3.47011e+06	3.8667e+06
Q80UW2	F-box only protein 2 OS=Mus musculus OX=10090 GN=Fbxo2 PE=1 SV=1	33.7	346508		457032	145102	104951	76507.5	4.41906e+06	4.70767e+06	2.18743e+06	2.19235e+06	1.43914e+06	178526
P35123	Ubiquitin carboxyl-terminal hydrolase 4 OS=Mus musculus OX=10090 GN=Usp4 PE=1 SV=3	108.3	509425	1.09615e+06	3.58034e+06	2.5081e+06	3.13467e+06	2.39638e+06	8.73623e+06	1.06917e+07	9.67774e+06	4.59976e+06	7.46793e+06	4.67763e+06
P48024	Eukaryotic translation initiation factor 1 OS=Mus musculus OX=10090 GN=Eif1 PE=1 SV=2	12.7	2.70823e+06	1.72312e+06	3.9282e+06	2.06968e+06	4.10004e+06	2.44701e+06	2.83401e+07	2.15779e+07	3.18829e+07	6.24434e+06	1.13033e+07	5.8818e+06
Q91WE2	PSME3-interacting protein OS=Mus musculus OX=10090 GN=Fam192a PE=1 SV=1	28.7	159962	86326.9	208642	308550	264720	445865	1.20556e+06	1.32245e+06	1.81641e+06	757817	828977	1.09375e+06
P70677	Caspase-3 OS=Mus musculus OX=10090 GN=Casp3 PE=1 SV=1	31.5	4.4182e+06	3.8743e+06	3.72596e+06	3.72308e+07	3.19161e+07	2.16176e+07	1.04768e+07	7.89294e+06	7.91526e+06	2.35258e+07	1.8297e+07	1.14369e+07
Q9DCT6	Chromatin complexes subunit BAP18 OS=Mus musculus OX=10090 GN=Bap18 PE=1 SV=1	18	177799	129182	224575	141146	967485	1.0415e+06	835577	1.26115e+06	527607	407084	817282	850050
Q03147	Cyclin-dependent kinase 7 OS=Mus musculus OX=10090 GN=Cdk7 PE=1 SV=2	38.9	258189		582293				4.84701e+06	5.45636e+06	5.12535e+06	389699	234773	60416.1
Q8C5N3	Pre-mRNA-splicing factor CWC22 homolog OS=Mus musculus OX=10090 GN=Cwc22 PE=1 SV=1	104.7	507045						1.81645e+06	4.62751e+06			1.00509e+06
Q80YT7	Myomegalin OS=Mus musculus OX=10090 GN=Pde4dip PE=1 SV=2	250.5	170141		150006		328912	110989	446346	477471	378613	221286	242344	47348.9
Q9JM14	5'(3')-deoxyribonucleotidase, cytosolic type OS=Mus musculus OX=10090 GN=Nt5c PE=1 SV=1	23.1	3.18556e+06	1.60167e+06	2.42632e+06	9.99638e+06	8.66712e+06	5.58916e+06	3.6343e+06	3.58908e+06	3.97777e+06	3.99789e+06	3.28263e+06	2.76684e+06
P58871	182 kDa tankyrase-1-binding protein OS=Mus musculus OX=10090 GN=Tnks1bp1 PE=1 SV=2	181.7	1.85158e+06		685357		277974		836440	1.30754e+06	994423			475059
P62492	Ras-related protein Rab-11A OS=Mus musculus OX=10090 GN=Rab11a PE=1 SV=3	24.4	783376	778984	603530	3.91702e+06	6.43433e+06	1.44925e+06	3.21422e+06	2.63931e+06	1.57979e+06	4.98821e+06	3.88359e+06	1.21012e+06
Q6P3A8	2-oxoisovalerate dehydrogenase subunit beta, mitochondrial OS=Mus musculus OX=10090 GN=Bckdhb PE=1 SV=2	42.9	2.53822e+06	2.26975e+06	4.7338e+06	1.9518e+06	3.8325e+06	1.89229e+06	9.00453e+06	8.84921e+06	1.15854e+07	1649732	2.91177e+06	1758503
Q60520	Paired amphipathic helix protein Sin3a OS=Mus musculus OX=10090 GN=Sin3a PE=1 SV=3	145	2.55813e+06	2.79038e+06	3.98568e+06	695732	491146	341177	1.14517e+07	1.37629e+07	6.09632e+06	317641	324879	667038
O55143	Sarcoplasmic/endoplasmic reticulum calcium ATPase 2 OS=Mus musculus OX=10090 GN=Atp2a2 PE=1 SV=2	114.8	1.05399e+07	1.3422e+07	1.13904e+07	2.40337e+07	2.27106e+07	2.08999e+07	2.86896e+07	3.00988e+07	3.03339e+07	1.81572e+07	1.27268e+07	1.39452e+07
P14576	Signal recognition particle 54 kDa protein OS=Mus musculus OX=10090 GN=Srp54 PE=1 SV=2	55.7	2.81723e+06	1.05408e+06	4796911	1.40992e+07	1.37558e+07	1.16086e+07	7.93638e+06	8.59864e+06	9.38606e+06	1.49934e+07	1.02667e+07	1.13327e+07
Q80UK0	SEC14 domain and spectrin repeat-containing protein 1 OS=Mus musculus OX=10090 GN=Sestd1 PE=1 SV=1	79.3	205822			531937	339263	119031	151669	458782	330439	1.91692e+06	1.55807e+06	177788
Q3UUG6	TBC1 domain family member 24 OS=Mus musculus OX=10090 GN=Tbc1d24 PE=1 SV=2	63.2	186546		283255	3.61876e+06	3.44521e+06	2.16689e+06		99191.2	133648	1.28851e+06	670770	244574
Q99J56	Derlin-1 OS=Mus musculus OX=10090 GN=Derl1 PE=1 SV=1	28.8	158445	295519	248357	613556	858209	666937	558361	717282	724711	204104	1.01879e+06	713775
Q9WUU9	Germinal-center associated nuclear protein OS=Mus musculus OX=10090 GN=Mcm3ap PE=1 SV=2	217.2							86757.3
Q8R4R6	Nucleoporin NUP35 OS=Mus musculus OX=10090 GN=Nup35 PE=1 SV=2	34.8	672391	884284			143481		2.87094e+06	3.54166e+06	501346	15821.7	656448	43964.1
Q8VCY6	U3 small nucleolar RNA-associated protein 6 homolog OS=Mus musculus OX=10090 GN=Utp6 PE=2 SV=1	70.4							423241	413721	216364	99438.2	195021	125929
Q8CI51	PDZ and LIM domain protein 5 OS=Mus musculus OX=10090 GN=Pdlim5 PE=1 SV=4	63.3	575805	547836	2.99849e+06	379653	2.36724e+06	1.5567e+06	3.61148e+06	3.95706e+06	7.37571e+06	352380	2.85404e+06	2.56647e+06
O88622	Poly(ADP-ribose) glycohydrolase OS=Mus musculus OX=10090 GN=Parg PE=1 SV=2	109.3	75651.4	185242	107377		81641.3		2.42792e+06	3.03376e+06	2.90907e+06	80789.9	79157.3	711802
Q8CCB4	Vacuolar protein sorting-associated protein 53 homolog OS=Mus musculus OX=10090 GN=Vps53 PE=1 SV=1	94.4	77305.8	367943	643378	370361	816494	371307	285576	981124	522996	347861	196803	216247
P34914	Bifunctional epoxide hydrolase 2 OS=Mus musculus OX=10090 GN=Ephx2 PE=1 SV=2	62.5	417773	409593	364406		123449		492515	566237	970794
P21981	Protein-glutamine gamma-glutamyltransferase 2 OS=Mus musculus OX=10090 GN=Tgm2 PE=1 SV=4	77	687769	733391	64540.3	5.15749e+06	4.01303e+06	3.97131e+06	692394	100058	213397	1.87523e+06	577738	563682
Q9WVK4	EH domain-containing protein 1 OS=Mus musculus OX=10090 GN=Ehd1 PE=1 SV=1	60.6	1.71964e+07	1.35952e+07	1.64088e+07	2.24235e+07	1.87279e+07	1.46345e+07	3.79706e+07	4.24686e+07	4.52791e+07	1.32779e+07	1.13342e+07	1.26754e+07
Q5SF07	Insulin-like growth factor 2 mRNA-binding protein 2 OS=Mus musculus OX=10090 GN=Igf2bp2 PE=1 SV=1	65.5	800278	670219	1.07312e+06	9.11008e+06	1.02122e+07	1.01997e+07	171615	144790	171687	371947	506731	606387
Q8CFE2	Histone PARylation factor 1 OS=Mus musculus OX=10090 GN=Hpf1 PE=1 SV=1	39.3	185007	122537	185332		649049	230127	2.50934e+06	2.66445e+06	1.4751e+06	188889	1.02136e+06	440676
P63044	Vesicle-associated membrane protein 2 OS=Mus musculus OX=10090 GN=Vamp2 PE=1 SV=2	12.7	535773	489284	365404	5.50798e+06	3.85547e+06	3.72702e+06	1.1957e+06	1.26988e+06	1.30005e+06	4.70795e+06	2.51351e+06	2.21976e+06
O35465	Peptidyl-prolyl cis-trans isomerase FKBP8 OS=Mus musculus OX=10090 GN=Fkbp8 PE=1 SV=2	43.5	621089	584662	388313	621387	262650	688652	3.371e+06	3.98224e+06	4.11181e+06	990146	793753	900220
Q923T9	Calcium/calmodulin-dependent protein kinase type II subunit gamma OS=Mus musculus OX=10090 GN=Camk2g PE=1 SV=1	59.6	671233	923375	262816	1.1757e+07	1.23833e+07	9.62185e+06	710979	533921	1.97613e+06	6.4649e+06	4.22387e+06	3.79617e+06
P82343	N-acylglucosamine 2-epimerase OS=Mus musculus OX=10090 GN=Renbp PE=1 SV=3	49.7	90757	254744	228438	622723	1.50703e+06	673459	983926	403469	865653	868854	1.01571e+06	747023
O35239	Tyrosine-protein phosphatase non-receptor type 9 OS=Mus musculus OX=10090 GN=Ptpn9 PE=1 SV=2	67.9				1.21042e+06	2.20736e+06	993293				714054	686359	632090
Q60865	Caprin-1 OS=Mus musculus OX=10090 GN=Caprin1 PE=1 SV=2	78.1	1.40829e+07	1.34217e+07	1.34641e+07	2.03029e+07	1.45205e+07	1.53703e+07	4.73695e+07	5.93222e+07	4.41521e+07	1.72969e+07	1.30032e+07	1.56296e+07
Q8R4U7	Leucine zipper protein 1 OS=Mus musculus OX=10090 GN=Luzp1 PE=1 SV=2	119.2							426013	862660	815540	97295.3	367041	415082
P62715	Serine/threonine-protein phosphatase 2A catalytic subunit beta isoform OS=Mus musculus OX=10090 GN=Ppp2cb PE=1 SV=1	35.6	1.90664e+07	1.81996e+07	1.85349e+07	5.73056e+07	6.27425e+07	4.31894e+07	6.09865e+07	6.91619e+07	6.09214e+07	5.19409e+07	4.85897e+07	3.9029e+07
P61211	ADP-ribosylation factor-like protein 1 OS=Mus musculus OX=10090 GN=Arl1 PE=1 SV=1	20.4	1.70654e+06	1.24286e+06	2.1734e+06	4.02208e+06	4.56392e+06	4.87246e+06	6.95308e+06	9.9355e+06	7.22818e+06	5.71999e+06	5.97341e+06	4.49281e+06
P49586	Choline-phosphate cytidylyltransferase A OS=Mus musculus OX=10090 GN=Pcyt1a PE=1 SV=1	41.6	184039	359753	307264	1.25165e+06	1.43779e+06	1.33876e+06	939247	1.22419e+06	1.33272e+06	1.42458e+06	1.16412e+06	1.72796e+06
P46638	Ras-related protein Rab-11B OS=Mus musculus OX=10090 GN=Rab11b PE=1 SV=3	24.5	3.92459e+06	2.72666e+06	3.2341e+06	2.5776e+07	2.10888e+07	2.04569e+07	9.13498e+06	9.02469e+06	7.8787e+06	1.95414e+07	1.22326e+07	1.36623e+07
P50396	Rab GDP dissociation inhibitor alpha OS=Mus musculus OX=10090 GN=Gdi1 PE=1 SV=3	50.5	5.67292e+06	5.51483e+06	6.78598e+06	2.61192e+08	1.77385e+08	1.67997e+08	8.55157e+06	6.80974e+06	7.8116e+06	8.86945e+07	5.24048e+07	5.45596e+07
Q99ME2	WD repeat-containing protein 6 OS=Mus musculus OX=10090 GN=Wdr6 PE=1 SV=1	121.8							2.52749e+06	3.29038e+06	2.10184e+06	1.18926e+06	696705	1.01942e+06
P33174	Chromosome-associated kinesin KIF4 OS=Mus musculus OX=10090 GN=Kif4 PE=1 SV=3	139.4			61474.1			18455.6	6.47132e+06	5.39076e+06	933303	930462	776736	485767
P47758	Signal recognition particle receptor subunit beta OS=Mus musculus OX=10090 GN=Srprb PE=1 SV=1	29.6	1.08005e+06	1.16186e+06	619718	1.80735e+06	3.17372e+06	1.86718e+06	3.60577e+06	3.17323e+06	1.65126e+06	1.41563e+06	2.0772e+06	1.31924e+06
P16125	L-lactate dehydrogenase B chain OS=Mus musculus OX=10090 GN=Ldhb PE=1 SV=2	36.5	2.34828e+07	1.89407e+07	1.22649e+07	1.11194e+08	1.56959e+08	1.07206e+08	2.69652e+07	2.53207e+07	2.98785e+07	4.49268e+07	5.85599e+07	3.9264e+07
Q3UM18	Large subunit GTPase 1 homolog OS=Mus musculus OX=10090 GN=Lsg1 PE=1 SV=2	73.1	513296	829074	580395				2.81896e+06	5.64262e+06	2.76668e+06		53043.9
Q3TIV5	Zinc finger CCCH domain-containing protein 15 OS=Mus musculus OX=10090 GN=Zc3h15 PE=1 SV=2	48.3	1.14183e+06	1.00589e+06	1.14325e+06	1.68793e+06	3.7328e+06	1.50752e+06	8.73589e+06	9.30901e+06	9.83848e+06	4.27669e+06	3.1721e+06	6.27825e+06
Q9EP71	Ankycorbin OS=Mus musculus OX=10090 GN=Rai14 PE=1 SV=1	108.8							581441	874976	340063	155701	165452	402891
Q91ZF0	DnaJ homolog subfamily C member 24 OS=Mus musculus OX=10090 GN=Dnajc24 PE=1 SV=4	16.9			5678.99		10931.3	30728.8	99046.8	105901	124266		160100	76564.7
P28704	Retinoic acid receptor RXR-beta OS=Mus musculus OX=10090 GN=Rxrb PE=1 SV=2	55.8							64502.8	80964.8		29101.2
P70122	Ribosome maturation protein SBDS OS=Mus musculus OX=10090 GN=Sbds PE=1 SV=4	28.8	1.58284e+06	1.82589e+06	1.55134e+06	1.61806e+06	2.10952e+06	1.50856e+06	6.94347e+06	7.95239e+06	6.5313e+06	1.99311e+06	1.56887e+06	1.91172e+06
O70475	UDP-glucose 6-dehydrogenase OS=Mus musculus OX=10090 GN=Ugdh PE=1 SV=1	54.8	1.20598e+06	956634	3.13748e+06	397597	1.38525e+06	1.0669e+06	7.74697e+06	9.31206e+06	9.42797e+06	525737	1.78647e+06	1.68737e+06
Q5F2E7	Nuclear fragile X mental retardation-interacting protein 2 OS=Mus musculus OX=10090 GN=Nufip2 PE=1 SV=1	75.6	790950	802841	823749	181616	375784		6.78981e+06	7.53138e+06	5.36743e+06	81690.3	199726	447608
P70460	Vasodilator-stimulated phosphoprotein OS=Mus musculus OX=10090 GN=Vasp PE=1 SV=4	39.6	3.3461e+06	3.71906e+06	2.26973e+06	2.29088e+06	4.1532e+06	3.87475e+06	9.37014e+06	9.64837e+06	9.2692e+06	3.33138e+06	3.52576e+06	1.33603e+06
Q8C570	mRNA export factor OS=Mus musculus OX=10090 GN=Rae1 PE=1 SV=1	40.9	2.0473e+06	2.34907e+06	431574	1.08735e+06	711469	713520	8.90901e+06	1.04021e+07	4.56264e+06	1.56186e+06	2.08858e+06	492310
B2RWS6	Histone acetyltransferase p300 OS=Mus musculus OX=10090 GN=Ep300 PE=1 SV=2	263.1				19766.1			1.78574e+06	1.60613e+06	1.69414e+06	793221	809631	541129
P15116	Cadherin-2 OS=Mus musculus OX=10090 GN=Cdh2 PE=1 SV=2	99.7				494681	390284	621918	68535.6	50768.3		611504	431188	407061
P54729	NEDD8 ultimate buster 1 OS=Mus musculus OX=10090 GN=Nub1 PE=1 SV=2	70.3	958566	3.11015e+06	1.613e+06	1.29717e+06	321161	404524	7.93125e+06	7.56108e+06	8.48301e+06	572597	349963	1.24599e+06
Q8BYK6	YTH domain-containing family protein 3 OS=Mus musculus OX=10090 GN=Ythdf3 PE=1 SV=2	63.9	1.54919e+06	1.92722e+06	637610	2.03215e+06	1.45056e+06	1.39203e+06	6.01288e+06	5.50208e+06	6.17265e+06	2050445	1.85497e+06	1.61834e+06
Q8BSP2	Condensin-2 complex subunit H2 OS=Mus musculus OX=10090 GN=Ncaph2 PE=1 SV=1	68.9								140784
Q9CQ40	39S ribosomal protein L49, mitochondrial OS=Mus musculus OX=10090 GN=Mrpl49 PE=1 SV=1	19.1	549239	95726.4	371308			44049.3	2.12734e+06	2.26973e+06	1.67839e+06			370985
Q6ZQ93	Ubiquitin carboxyl-terminal hydrolase 34 OS=Mus musculus OX=10090 GN=Usp34 PE=1 SV=3	408	2306301	1.64865e+06	3370837	258146	383413	409572	8.42929e+06	5.72933e+06	1.02501e+07	129768	493776	338235
Q6VGS5	Protein Daple OS=Mus musculus OX=10090 GN=Ccdc88c PE=1 SV=1	226.4							30811.7		56506.5
P38532	Heat shock factor protein 1 OS=Mus musculus OX=10090 GN=Hsf1 PE=1 SV=2	57.2							218310	149787	406533	129655		391748
Q61037	Tuberin OS=Mus musculus OX=10090 GN=Tsc2 PE=1 SV=1	201.9								88056.9	179072			81522.9
Q9Z207	Protein diaphanous homolog 3 OS=Mus musculus OX=10090 GN=Diaph3 PE=1 SV=1	133.6							172320	334759	161482	103811	384756
Q3TWF6	WD repeat-containing protein 70 OS=Mus musculus OX=10090 GN=Wdr70 PE=1 SV=1	73.1							79778.8	97572.7	175807	48477.6	37489.8	33424.4
Q80ZS3	28S ribosomal protein S26, mitochondrial OS=Mus musculus OX=10090 GN=Mrps26 PE=1 SV=1	23.4	83885	48907.1	135447				306200	248177	349900
Q3TLS3	GDP-D-glucose phosphorylase 1 OS=Mus musculus OX=10090 GN=Gdpgp1 PE=1 SV=2	42.5							355689	113511	386600		190680	268168
Q9QYR6	Microtubule-associated protein 1A OS=Mus musculus OX=10090 GN=Map1a PE=1 SV=2	300	279584	273081	512179	1.85957e+06	1.4469e+06	1.45966e+06	191845	365592	593179	361279	237365	650447
Q9QZE7	Translin-associated protein X OS=Mus musculus OX=10090 GN=Tsnax PE=1 SV=1	32.9	4.78218e+06	5.00109e+06	5.25267e+06	1.81946e+07	1.30322e+07	1.32476e+07	1.13067e+07	1.23344e+07	1.21716e+07	1.04199e+07	1.15094e+07	4.71956e+06
P31750	RAC-alpha serine/threonine-protein kinase OS=Mus musculus OX=10090 GN=Akt1 PE=1 SV=2	55.7	375389	461356	641480	6.10924e+06	4.88867e+06	4.60406e+06	1.091e+06	1.23983e+06	1.1523e+06	4.1327e+06	2.73685e+06	2.2667e+06
O35250	Exocyst complex component 7 OS=Mus musculus OX=10090 GN=Exoc7 PE=1 SV=2	79.9	238092	565109	136591	970424	2.15806e+06	1.32814e+06	838711	417446	305159	776566	1.05181e+06	262223
Q9QZQ8	Core histone macro-H2A.1 OS=Mus musculus OX=10090 GN=H2afy PE=1 SV=3	39.7				13910.8	66715.3
Q8C156	Condensin complex subunit 2 OS=Mus musculus OX=10090 GN=Ncaph PE=1 SV=1	82.3	2.30991e+06	2.05058e+06	3.65334e+06	1.95572e+06	1.73562e+06	2.55274e+06	1.11508e+07	1.21166e+07	1.5545e+07	2.79319e+06	2.02868e+06	2.44321e+06
Q9QYS9	Protein quaking OS=Mus musculus OX=10090 GN=Qki PE=1 SV=1	37.6	310512	1.78839e+06	381175	2.04024e+06	2.69896e+06	1.84484e+06	4.64427e+06	4.1396e+06	5.2873e+06	4.44755e+06	3.68225e+06	3.91884e+06
Q99LC2	Cleavage stimulation factor subunit 1 OS=Mus musculus OX=10090 GN=Cstf1 PE=1 SV=1	48.4	227125	189893	16614.1	100954		76700.8	4.32651e+06	3.96364e+06	1.00398e+06	759558	527444	102133
P07356	Annexin A2 OS=Mus musculus OX=10090 GN=Anxa2 PE=1 SV=2	38.7	5.46363e+06	1.09319e+07	9.80356e+06	3.48289e+07	3.88876e+07	3.11478e+07	7735175	1.39672e+07	7.90211e+06	8.95686e+06	9.08339e+06	9.84999e+06
P70372	ELAV-like protein 1 OS=Mus musculus OX=10090 GN=Elavl1 PE=1 SV=2	36.1	5.31617e+06	5.27076e+06	1.23942e+06	5.93512e+06	6.1513e+06	3.95365e+06	2.14792e+07	2.24209e+07	8.99067e+06	8.91724e+06	5.33356e+06	4.92921e+06
Q3U7U3	F-box only protein 7 OS=Mus musculus OX=10090 GN=Fbxo7 PE=1 SV=2	57.6									91146.9
D3YZP9	Coiled-coil domain-containing protein 6 OS=Mus musculus OX=10090 GN=Ccdc6 PE=1 SV=1	52.9	659179	1.03108e+06	1.03318e+06	4.14253e+06	2.7511e+06	2.20166e+06	1.8551e+06	1.69847e+06	1.47955e+06	2.0172e+06	1.20823e+06	872882
Q8BIA4	F-box/WD repeat-containing protein 8 OS=Mus musculus OX=10090 GN=Fbxw8 PE=1 SV=2	67.9							215565	224308	273563		149582	262550
Q91VI7	Ribonuclease inhibitor OS=Mus musculus OX=10090 GN=Rnh1 PE=1 SV=1	49.8	1.2758e+07	1.22063e+07	1.42067e+07	2.08725e+07	1.87453e+07	2.18319e+07	2.29113e+07	2.43493e+07	2.44888e+07	6.85058e+06	7.81406e+06	1.24811e+07
Q60680	Inhibitor of nuclear factor kappa-B kinase subunit alpha OS=Mus musculus OX=10090 GN=Chuk PE=1 SV=1	84.7							247444		295124	549737
Q91VE0	Long-chain fatty acid transport protein 4 OS=Mus musculus OX=10090 GN=Slc27a4 PE=1 SV=1	72.3			70156.5	230181	45443
P43275	Histone H1.1 OS=Mus musculus OX=10090 GN=Hist1h1a PE=1 SV=2	21.8	1.96808e+06	1.6957e+06	844284	1.19487e+06		1.27882e+06	9.40521e+06	8.50906e+06	4.98258e+06	1.64304e+06		2.00721e+06
P51863	V-type proton ATPase subunit d 1 OS=Mus musculus OX=10090 GN=Atp6v0d1 PE=1 SV=2	40.3	858066	7.53791e+06	1.24947e+06	6.78169e+06	4.38057e+06	3.78441e+06	4.40839e+06	9.20388e+06	5.71807e+06	5.20904e+06	2.32215e+06	3.3429e+06
P41230	Lysine-specific demethylase 5C OS=Mus musculus OX=10090 GN=Kdm5c PE=1 SV=4	175.2							321545	256294	181944	65550.8	42274.3	290299
Q9WUC3	Lymphocyte antigen 6H OS=Mus musculus OX=10090 GN=Ly6h PE=1 SV=2	14.7				4.58282e+06	931425	2.79175e+06				1.83132e+06	609682	1.07092e+06
Q99LH1	Nucleolar GTP-binding protein 2 OS=Mus musculus OX=10090 GN=Gnl2 PE=1 SV=2	83.3							1.19762e+06	1.50736e+06	1.05069e+06	464213	707841	289944
Q6PG16	Holliday junction recognition protein OS=Mus musculus OX=10090 GN=Hjurp PE=1 SV=1	74.2	148174	177176					398536	276994	89992.8
Q9DB20	ATP synthase subunit O, mitochondrial OS=Mus musculus OX=10090 GN=Atp5po PE=1 SV=1	23.3	1.49257e+07	1.30706e+07	1.30007e+07	1.97085e+07	1.09948e+07	1.03292e+07	3.09841e+07	3.21713e+07	3.14334e+07	7.0777e+06	7.07234e+06	6.80905e+06
P62488	DNA-directed RNA polymerase II subunit RPB7 OS=Mus musculus OX=10090 GN=Polr2g PE=1 SV=1	19.3		1.47875e+06	176601	112692	408935		1.4744e+06	2.24635e+06	1.10161e+06	906701		834871
Q91V64	Isochorismatase domain-containing protein 1 OS=Mus musculus OX=10090 GN=Isoc1 PE=1 SV=1	32	1.70362e+06	1.89071e+06	1.2908e+06	1.36565e+07	1.22802e+07	1.1685e+07	2.15843e+06	2.28539e+06	1.3726e+06	4.16854e+06	2.79512e+06	3.32419e+06
P97379	Ras GTPase-activating protein-binding protein 2 OS=Mus musculus OX=10090 GN=G3bp2 PE=1 SV=2	54.1	1.33661e+07	1.26808e+07	1.26472e+07	6.21597e+06	8.67698e+06	5.03472e+06	3.628e+07	4.54393e+07	2.04107e+07	6.33166e+06	2.59478e+06	3.14573e+06
P22907	Porphobilinogen deaminase OS=Mus musculus OX=10090 GN=Hmbs PE=1 SV=2	39.3	4.87221e+06	4.49958e+06	4.57561e+06	6.44342e+06	1.1221e+07	8.19936e+06	1.14724e+07	1.2666e+07	1.45175e+07	1.45542e+07	1.35408e+06	7.66823e+06
Q60973	Histone-binding protein RBBP7 OS=Mus musculus OX=10090 GN=Rbbp7 PE=1 SV=1	47.8	2.08191e+07	1.85019e+07	2.54005e+07	2.1047e+07	27868434	2.37227e+07	6.15011e+07	6.39766e+07	8.03702e+07	1.54788e+07	2.0862e+07	1.67609e+07
Q69ZS7	HBS1-like protein OS=Mus musculus OX=10090 GN=Hbs1l PE=1 SV=2	75.1			52045.4			157264	448712	690893	693153	145807	254805	492949
Q61102	ATP-binding cassette sub-family B member 7, mitochondrial OS=Mus musculus OX=10090 GN=Abcb7 PE=1 SV=3	82.5							974092	1.49575e+06	472485	160041	484114	360859
Q8BHS3	Pre-mRNA-splicing factor RBM22 OS=Mus musculus OX=10090 GN=Rbm22 PE=1 SV=1	46.9							911522	881091	420500	126598	312828	318649
Q9JLM4	Zinc finger MYM-type protein 3 OS=Mus musculus OX=10090 GN=Zmym3 PE=1 SV=1	152.8							532441	506187	180813	309807		381149
O70589	Peripheral plasma membrane protein CASK OS=Mus musculus OX=10090 GN=Cask PE=1 SV=2	105	2.13512e+06	1.4725e+06	2.18046e+06	1.18847e+07	7.14878e+06	5.92692e+06	5.72751e+06	4.6015e+06	6.40471e+06	7.51547e+06	4.99024e+06	3.93523e+06
Q64152	Transcription factor BTF3 OS=Mus musculus OX=10090 GN=Btf3 PE=1 SV=3	22	9.45748e+06	1.07042e+07	1.17823e+07	6.38857e+06	7.89533e+06	8.82911e+06	4.426e+07	5.7188e+07	5.24764e+07	8.49499e+06	7.47931e+06	9.27442e+06
P70288	Histone deacetylase 2 OS=Mus musculus OX=10090 GN=Hdac2 PE=1 SV=1	55.3	1.78078e+06	1.39795e+06	750761	4.48656e+06	3.31955e+06	2.93323e+06	4.78477e+06	4.42012e+06	2.65159e+06	3.07507e+06	1.75401e+06	2.86836e+06
P48725	Pericentrin OS=Mus musculus OX=10090 GN=Pcnt PE=1 SV=2	329.3							1.06778e+06	928891	350668	150253	281491	264031
P63037	DnaJ homolog subfamily A member 1 OS=Mus musculus OX=10090 GN=Dnaja1 PE=1 SV=1	44.8	2.65678e+06	3.44767e+06	3.05167e+06	3.94014e+06	2.68295e+06	3.4719e+06	1.83377e+07	2.80812e+07	1.92559e+07	6.39748e+06	5.00522e+06	4.792e+06
Q8R4X3	RNA-binding protein 12 OS=Mus musculus OX=10090 GN=Rbm12 PE=1 SV=3	102.7	2.15019e+06	2.2482e+06	2.22084e+06	4.21774e+06	4.05622e+06	3.3633e+06	2.63602e+06	2.19436e+06	1.78259e+06	842678	912129	845636
Q3UFY7	7-methylguanosine phosphate-specific 5'-nucleotidase OS=Mus musculus OX=10090 GN=Nt5c3b PE=1 SV=3	34.4	442627	914045	540261	1.83447e+06	1.27246e+06	1.57108e+06	1.50933e+06	1.78349e+06	1.93824e+06	1.21747e+06	736030	1.14414e+06
Q63850	Nuclear pore glycoprotein p62 OS=Mus musculus OX=10090 GN=Nup62 PE=1 SV=2	53.2	2.59866e+06	2.17026e+06	712954	657547	788628	680684	1.19734e+07	1.29707e+07	8.51229e+06	1.84833e+06	1.70316e+06	430227
Q70FJ1	A-kinase anchor protein 9 OS=Mus musculus OX=10090 GN=Akap9 PE=1 SV=2	435.9	2.58872e+06	1.53751e+06	1.73925e+06	4.20623e+06	1.31191e+06	2.46398e+06	1.04985e+06	1.30611e+06	1.18584e+06	419842	228096	388587
Q9DBS5	Kinesin light chain 4 OS=Mus musculus OX=10090 GN=Klc4 PE=1 SV=1	68.6	414496	641677	1.24388e+06	4.00262e+06	4.70103e+06	3.44865e+06	1.36395e+06	441719	1.27009e+06	1.33304e+06	1.09008e+06	1.19584e+06
P10493	Nidogen-1 OS=Mus musculus OX=10090 GN=Nid1 PE=1 SV=2	136.5							55425.3	82072.2	72100	63881.2
Q8BYA0	Tubulin-specific chaperone D OS=Mus musculus OX=10090 GN=Tbcd PE=1 SV=1	133.2	2.05997e+06	1.79512e+06	3.26097e+06	9.04266e+06	7.71307e+06	5.36504e+06	6.98286e+06	4.86991e+06	7.42032e+06	6.04966e+06	5.26435e+06	2.8259e+06
Q9CQH8	Ribonuclease P protein subunit p14 OS=Mus musculus OX=10090 GN=Rpp14 PE=1 SV=1	13.6		232386					89249.5	85284.4	118318
Q80UU1	Ankyrin repeat and zinc finger domain-containing protein 1 OS=Mus musculus OX=10090 GN=Ankzf1 PE=1 SV=2	82.9							96372	248400	163742	145479		90949.7
P97311	DNA replication licensing factor MCM6 OS=Mus musculus OX=10090 GN=Mcm6 PE=1 SV=1	92.8	2.12232e+07	1.9264e+07	2.40218e+07	7.25074e+06	1.45172e+07	1.48482e+07	6.97879e+07	6.22687e+07	7.55548e+07	4.37208e+06	1.56047e+07	8.63249e+06
Q63810	Calcineurin subunit B type 1 OS=Mus musculus OX=10090 GN=Ppp3r1 PE=1 SV=3	19.3	152658	534866	192087	8.87066e+06	3.99134e+06	3.91607e+06	816982	1.25588e+06	489696	5.36694e+06	3.33567e+06	2.78451e+06
P61620	Protein transport protein Sec61 subunit alpha isoform 1 OS=Mus musculus OX=10090 GN=Sec61a1 PE=1 SV=2	52.2	4.82785e+06	4.03988e+06	4.7217e+06	7.08412e+06	5.605e+06	5.02481e+06	1.86597e+07	1.71616e+07	1.56201e+07	4.72708e+06	5.48541e+06	4.66616e+06
Q8VDP3	[F-actin]-monooxygenase MICAL1 OS=Mus musculus OX=10090 GN=Mical1 PE=1 SV=1	116.7							1.05482e+06	1.49598e+06	1.43183e+06	334486	669130	342435
Q8BVY0	Ribosomal L1 domain-containing protein 1 OS=Mus musculus OX=10090 GN=Rsl1d1 PE=1 SV=1	50.4	345304	139251	298176	52533.2	197235	126635	5.257e+06	5.41575e+06	3.27375e+06	646978	290761	502913
Q811I0	ATP synthase mitochondrial F1 complex assembly factor 1 OS=Mus musculus OX=10090 GN=Atpaf1 PE=1 SV=1	36.3	957284	1.28899e+06	792904	336747	68437.7		1.46741e+06	2.06975e+06	2.10879e+06		137420
Q8CHC4	Synaptojanin-1 OS=Mus musculus OX=10090 GN=Synj1 PE=1 SV=3	172.5			124834	859134	586126	852790				208446	80959.8	135719
P60330	Separin OS=Mus musculus OX=10090 GN=Espl1 PE=1 SV=1	232.9	404402	522782	945322	1.26112e+06	1.97017e+06		6.2266e+06	6.63708e+06	4.35955e+06	968432	913747	366692
Q80SW1	S-adenosylhomocysteine hydrolase-like protein 1 OS=Mus musculus OX=10090 GN=Ahcyl1 PE=1 SV=1	58.9	1.57119e+06	842138	341653	3.39256e+06	3.46377e+06	4.15118e+06	3.89521e+06	2.31533e+06	4.3402e+06	3.76523e+06	3.02384e+06	4.08117e+06
Q9ERU9	E3 SUMO-protein ligase RanBP2 OS=Mus musculus OX=10090 GN=Ranbp2 PE=1 SV=2	340.9	5.98099e+06	3.95325e+06	296936	1.89619e+06	1.51416e+06	2.02912e+06	3.33375e+07	3.74974e+07	7.21175e+06	4.73218e+06	5.10671e+06	3.40187e+06
Q8C0L8	Conserved oligomeric Golgi complex subunit 5 OS=Mus musculus OX=10090 GN=Cog5 PE=1 SV=3	91.3		77912.3	50211.5	92718.8	106607	95049.9
Q99PG2	Opioid growth factor receptor OS=Mus musculus OX=10090 GN=Ogfr PE=1 SV=1	70.6	566471	180085	370660	9.45912e+06	5.53866e+06	6.26742e+06	756550	643072	751551	4.39073e+06	2.35788e+06	3.30907e+06
Q9CQT1	Methylthioribose-1-phosphate isomerase OS=Mus musculus OX=10090 GN=Mri1 PE=1 SV=1	39.4	1.86708e+06	1.08815e+06	2.97598e+06	1.32919e+06	1.98216e+06	1.38432e+06	7.33602e+06	7.24127e+06	7.13595e+06	1.32825e+06	1.70619e+06	1.08597e+06
Q91W96	Anaphase-promoting complex subunit 4 OS=Mus musculus OX=10090 GN=Anapc4 PE=1 SV=1	91.6	731468	777510	68318.6	1.44831e+06	1.38062e+06	765645	1.18103e+06	1.1354e+06	1.1675e+06	1.58627e+06	1.52113e+06	274632
P17918	Proliferating cell nuclear antigen OS=Mus musculus OX=10090 GN=Pcna PE=1 SV=2	28.8	3.06233e+07	2.91987e+07	4.19514e+07	1.27053e+07	3.23902e+07	3.94126e+07	6.78421e+07	7.16433e+07	8.87002e+07	8.97533e+06	1.33197e+07	1.66021e+07
O88561	Long-chain fatty acid transport protein 3 OS=Mus musculus OX=10090 GN=Slc27a3 PE=1 SV=2	72.9	98356	150953	155549	1.33202e+06	1.00636e+06	526486	34598.8	215348		31816.3	217143	57768.8
Q61656	Probable ATP-dependent RNA helicase DDX5 OS=Mus musculus OX=10090 GN=Ddx5 PE=1 SV=2	69.2	2.86838e+07	2.76368e+07	1.71595e+07	1.84225e+07	1.9445e+07	1.99216e+07	1.47613e+08	1.59995e+08	8.2148e+07	2.28985e+07	2.01903e+07	2.33379e+07
Q811J3	Iron-responsive element-binding protein 2 OS=Mus musculus OX=10090 GN=Ireb2 PE=1 SV=2	104.9							162469	109300			59465
Q9DAW9	Calponin-3 OS=Mus musculus OX=10090 GN=Cnn3 PE=1 SV=1	36.4	5.34963e+06	4.10705e+06	4.6991e+06	1.65582e+07	3.37174e+07	2.90275e+07	2.73951e+07	2.82855e+07	2.99185e+07	2.68344e+07	4.13625e+07	3.44683e+07
Q5XJY5	Coatomer subunit delta OS=Mus musculus OX=10090 GN=Arcn1 PE=1 SV=2	57.2	1.35711e+07	4.73023e+06	5.57988e+06	2.7535e+07	2.14379e+07	2.07376e+07	2.22412e+07	2.23833e+07	2.38899e+07	1.7993e+07	1.42112e+07	1.67063e+07
Q8BX70	Vacuolar protein sorting-associated protein 13C OS=Mus musculus OX=10090 GN=Vps13c PE=1 SV=2	419.8					725267		88717.1		199902	182216	303372
Q3URE1	Acyl-CoA synthetase family member 3, mitochondrial OS=Mus musculus OX=10090 GN=Acsf3 PE=1 SV=2	65	140978		133492	245887	150947	156312
Q6ZQ03	Formin-binding protein 4 OS=Mus musculus OX=10090 GN=Fnbp4 PE=1 SV=2	111.2	138191	87896.4	116021		115630	141883	526743	865651	256886	44360.2	67682.1	73675.7
P0DN34	NADH dehydrogenase [ubiquinone] 1 beta subcomplex subunit 1 OS=Mus musculus OX=10090 GN=Ndufb1 PE=1 SV=1	7	1.02457e+06	653726	670113		111185		1.57167e+06	1.94092e+06	1.08818e+06
P62631	Elongation factor 1-alpha 2 OS=Mus musculus OX=10090 GN=Eef1a2 PE=1 SV=1	50.4	356912	857050	229452	5436371	379561	1.16141e+06	688954	1.81752e+06		2.30016e+06		232920
P09926	Surfeit locus protein 2 OS=Mus musculus OX=10090 GN=Surf2 PE=1 SV=1	30.3							719920	1.9434e+06	338642	120673	797779	207815
P36993	Protein phosphatase 1B OS=Mus musculus OX=10090 GN=Ppm1b PE=1 SV=1	42.8	522806	858335	752732	1.54889e+06	2.62985e+06	1.73206e+06	1.99439e+06	2.23946e+06	2.27984e+06	948487	1.40213e+06	1.64954e+06
Q8K2X3	CST complex subunit STN1 OS=Mus musculus OX=10090 GN=Stn1 PE=1 SV=2	43.5	378513	538049	137700	409137	684679	499361	217633	267315	127978	46150.4	58866.5	140852
P47753	F-actin-capping protein subunit alpha-1 OS=Mus musculus OX=10090 GN=Capza1 PE=1 SV=4	32.9	6.63519e+06	8.48989e+06	8.01813e+06	2.32728e+07	1.80738e+07	1.74731e+07	1.05726e+07	1.26037e+07	1.11419e+07	6.53637e+06	5.39645e+06	7.04861e+06
Q8K1E0	Syntaxin-5 OS=Mus musculus OX=10090 GN=Stx5 PE=1 SV=3	39.7	624502	1.70699e+06	575572	1.46081e+06	1.53358e+06	1.26415e+06	2.37589e+06	2.70753e+06	2.891e+06	341809	1.95251e+06	1.30795e+06
Q3THS6	S-adenosylmethionine synthase isoform type-2 OS=Mus musculus OX=10090 GN=Mat2a PE=1 SV=2	43.7	1.20182e+07	1.34659e+07	1.55932e+07	6.28423e+06	9.25406e+06	8.6264e+06	4.36216e+07	5.20871e+07	5.44756e+07	5.38248e+06	5.67033e+06	8.17319e+06
Q61490	CD166 antigen OS=Mus musculus OX=10090 GN=Alcam PE=1 SV=3	65.1				3.63532e+06	1.66724e+06	2.245e+06				2.62575e+06	688768	605972
P24860	G2/mitotic-specific cyclin-B1 OS=Mus musculus OX=10090 GN=Ccnb1 PE=1 SV=3	48	422885	335517	602907			457664	8.75743e+06	9.47121e+06	5.95642e+06	339082	508200	40777.9
Q9QZM4	Tumor necrosis factor receptor superfamily member 10B OS=Mus musculus OX=10090 GN=Tnfrsf10b PE=2 SV=3	42.1							1.49152e+06	1.15923e+06	1.23041e+06	488898	371363	362429
P56581	G/T mismatch-specific thymine DNA glycosylase OS=Mus musculus OX=10090 GN=Tdg PE=1 SV=2	46.8				414194	362570	357877		178634	293274	977599	891428	786078
Q6PE01	U5 small nuclear ribonucleoprotein 40 kDa protein OS=Mus musculus OX=10090 GN=Snrnp40 PE=1 SV=1	39.3	458729	476195	331882	154813	236305	423666	4.1201e+06	5.35807e+06	1.23863e+06	332808	398753	445630
Q9R069	Basal cell adhesion molecule OS=Mus musculus OX=10090 GN=Bcam PE=1 SV=1	67.6	1.80244e+06	1.68627e+06	4.09672e+06	66683.8	148049	1.95796e+06	2.09958e+07	2.67195e+07	2.52702e+07	449007	644507	768596
Q922E4	Ethanolamine-phosphate cytidylyltransferase OS=Mus musculus OX=10090 GN=Pcyt2 PE=1 SV=1	45.2	177231	236418	244186	364429	309329		948508	1.02533e+06	1.15896e+06	128064	134415	102560
O88746	Target of Myb protein 1 OS=Mus musculus OX=10090 GN=Tom1 PE=1 SV=1	54.3	875807	706252	832060	1.94177e+06	898114	1.29622e+06	4.99529e+06	7.13967e+06	5.99481e+06	2.57734e+06	2.78456e+06	1.31201e+06
Q9CQW1	Synaptobrevin homolog YKT6 OS=Mus musculus OX=10090 GN=Ykt6 PE=1 SV=1	22.3	1.34013e+06	1.12533e+06	1.74755e+07	1.04448e+07	8.11129e+06	9.48677e+06	5.35614e+06	5.6106e+06	5.82169e+06	4.66017e+06	3.48071e+06	3.28327e+06
Q91YE6	Importin-9 OS=Mus musculus OX=10090 GN=Ipo9 PE=1 SV=3	116	7.14907e+06	4.98652e+06	7.98006e+06	2.48085e+07	2.94114e+07	2.26286e+07	2.48134e+07	1.91125e+07	2.48792e+07	3.61336e+07	1.5127e+07	1.2464e+07
Q9WUD8	Fas apoptotic inhibitory molecule 1 OS=Mus musculus OX=10090 GN=Faim PE=1 SV=1	20.2	49952.1	75497.5	79619.8	261271	285269		596957	955306	504087	240095	157646	262390
Q5SNZ0	Girdin OS=Mus musculus OX=10090 GN=Ccdc88a PE=1 SV=2	215.8	217320	289142		918924	777723	745492		47982	136985	402995		235591
Q80SY6	Adenosine deaminase-like protein OS=Mus musculus OX=10090 GN=Adal PE=2 SV=1	41	114793	102582	89617.7	303730	444499	216243
Q9D4J7	PHD finger protein 6 OS=Mus musculus OX=10090 GN=Phf6 PE=1 SV=1	41.1							206603	122222	198798		97327.5	140268
O55091	Protein IMPACT OS=Mus musculus OX=10090 GN=Impact PE=1 SV=2	36.3	170574	355469	571810	231103	146000	353651	2.75258e+06	5.44621e+06	3.94143e+06	588139	341535	998081
P50543	Protein S100-A11 OS=Mus musculus OX=10090 GN=S100a11 PE=1 SV=1	11.1	1.16852e+07	7.70851e+06	9.40257e+06	1.50629e+07	9.08319e+06	1.23366e+07	2.82526e+07	2.33664e+07	2.0613e+07	7.08985e+06	6.62739e+06	5.67473e+06
Q8BNW9	Kelch repeat and BTB domain-containing protein 11 OS=Mus musculus OX=10090 GN=Kbtbd11 PE=1 SV=3	67.9	232682		599730		2.09061e+06		203405	250119	356141	146194	37358.2
Q08943	FACT complex subunit SSRP1 OS=Mus musculus OX=10090 GN=Ssrp1 PE=1 SV=2	80.8	5.76625e+06	6.69782e+06	4.12225e+06	2.06267e+06	4.72036e+06	4.97149e+06	2.16774e+07	2.60636e+07	1.59329e+07	2.40785e+06	3.87006e+06	2.87977e+06
Q61189	Methylosome subunit pICln OS=Mus musculus OX=10090 GN=Clns1a PE=1 SV=1	26	5.15731e+06	4.14791e+06	5.34506e+06	4.17026e+06	5.18602e+06	3.74593e+06	1.70774e+07	1.6313e+07	1.90439e+07	3.76355e+06	3.77987e+06	2.58089e+06
P19182	Interferon-related developmental regulator 1 OS=Mus musculus OX=10090 GN=Ifrd1 PE=1 SV=2	49.9									183820
Q60759	Glutaryl-CoA dehydrogenase, mitochondrial OS=Mus musculus OX=10090 GN=Gcdh PE=1 SV=2	48.6	489351	632793	546278	297228	118127	466899	1.83426e+06	1.79254e+06	1.34762e+06		633493	478070
P97434	Myosin phosphatase Rho-interacting protein OS=Mus musculus OX=10090 GN=Mprip PE=1 SV=2	116.3					84117.2
Q8R3S6	Exocyst complex component 1 OS=Mus musculus OX=10090 GN=Exoc1 PE=1 SV=4	101.8	538588	1.42224e+06	160851	1.3798e+06	1.95866e+06	1.07215e+06	2.09709e+06	1.45485e+06	634975	887405	1.09541e+06	453122
Q9D882	Uncharacterized protein FAM241B OS=Mus musculus OX=10090 GN=Fam241b PE=1 SV=1	13.1							541734	747160	373020	381673	222041	59675.5
Q3UVL4	Vacuolar protein sorting-associated protein 51 homolog OS=Mus musculus OX=10090 GN=Vps51 PE=1 SV=2	86.1	474433	249054	264806	1.31259e+06	1.18771e+06	585764	1.68595e+06	747657	586855	827283	631079	397594
Q99N85	28S ribosomal protein S18a, mitochondrial OS=Mus musculus OX=10090 GN=Mrps18a PE=2 SV=1	22.3								1.02952e+06	101626		459365
P70196	TNF receptor-associated factor 6 OS=Mus musculus OX=10090 GN=Traf6 PE=1 SV=2	60	929704	765507	1.3508e+06	933454	924880	1.23431e+06	2856618	2.90056e+06	3498853	637271	637268	756370
Q9CXG3	Peptidyl-prolyl cis-trans isomerase-like 4 OS=Mus musculus OX=10090 GN=Ppil4 PE=1 SV=2	57.2							1.62799e+06	1.2702e+06	742600	298251	692445	253760
Q64520	Guanylate kinase OS=Mus musculus OX=10090 GN=Guk1 PE=1 SV=2	21.9	2.06467e+06	1.49249e+06	2.1706e+06	3.68048e+06	2.99719e+06	2.35337e+06	3.00799e+06	5.31105e+06	3.70145e+06	1.46932e+06	787918	1.88973e+06
Q9CQ21	Malignant T-cell-amplified sequence 2 OS=Mus musculus OX=10090 GN=Mcts2 PE=1 SV=1	20.4	530243		672825	392994	592249	461478
P26039	Talin-1 OS=Mus musculus OX=10090 GN=Tln1 PE=1 SV=2	269.7	1.82138e+07	1.12742e+07	1.26766e+07	1.34218e+07	2.39849e+07	2.81081e+07	5.56197e+07	6.56837e+07	5.41666e+07	1.91113e+07	1.62683e+07	2.0914e+07
P53612	Geranylgeranyl transferase type-2 subunit beta OS=Mus musculus OX=10090 GN=Rabggtb PE=1 SV=2	37.8	518672	120702	393671	337193	544975	375471	1.35902e+06	1.27012e+06	654177	580535	263145	194899
Q9EPW0	Type I inositol 3,4-bisphosphate 4-phosphatase OS=Mus musculus OX=10090 GN=Inpp4a PE=1 SV=1	105.5		494938		498678		166462
Q9CR86	Calcium-regulated heat stable protein 1 OS=Mus musculus OX=10090 GN=Carhsp1 PE=1 SV=1	16.1	1.30226e+06	1.84516e+06	514407	1.36491e+07	1.48994e+07	1.1226e+07	2.22066e+06	3.80851e+06	2.64542e+06	8990800	7.00747e+06	6.16893e+06
Q2HXL6	ER degradation-enhancing alpha-mannosidase-like protein 3 OS=Mus musculus OX=10090 GN=Edem3 PE=1 SV=2	104.1							86155.8	275406	188202	112160	131607
Q8R1N4	NudC domain-containing protein 3 OS=Mus musculus OX=10090 GN=Nudcd3 PE=1 SV=3	40.9	1.56959e+06	1.4112e+06	526179	3.0672e+06	569010	2.45016e+06	8.16902e+06	7.64496e+06	5.62639e+06	3.53409e+06	1.55935e+06	2.18405e+06
Q4VA53	Sister chromatid cohesion protein PDS5 homolog B OS=Mus musculus OX=10090 GN=Pds5b PE=1 SV=1	164.3	68961.6	153429	75323.1	86045.1		162763	3.33278e+06	3.34955e+06	733259	1.57627e+06	128687	96582.2
P14873	Microtubule-associated protein 1B OS=Mus musculus OX=10090 GN=Map1b PE=1 SV=2	270.1	4.59808e+06	4.08651e+06	9.16557e+06	3.4024e+08	2.68322e+08	2.39661e+08	1.64992e+07	2.28289e+07	2.12462e+07	2.85116e+08	1.811e+08	1.82992e+08
Q80U93	Nuclear pore complex protein Nup214 OS=Mus musculus OX=10090 GN=Nup214 PE=1 SV=2	212.8	1.94442e+06	1.52262e+06	857402	874022	673939	275715	6.54224e+06	8.94487e+06	1.98632e+06	565612	378268	321862
Q91W67	Ubiquitin-like protein 7 OS=Mus musculus OX=10090 GN=Ubl7 PE=1 SV=2	40.4	368833	195406	184774	1.45986e+06	1.01086e+06	985886	2.28857e+06	3.11155e+06	3.38245e+06	2.6495e+06	5.39972e+06	1.70121e+06
Q9QYC0	Alpha-adducin OS=Mus musculus OX=10090 GN=Add1 PE=1 SV=2	80.6	445721	617349	363291	2.32441e+07	2.16457e+07	1.40102e+07	1.55966e+06	1.87804e+06	1.01473e+06	1.83525e+07	1.05563e+07	9.89666e+06
Q9Z1J3	Cysteine desulfurase, mitochondrial OS=Mus musculus OX=10090 GN=Nfs1 PE=1 SV=3	50.5	89798.8	96408.2	42051.8	242656	418418	258676	457254	451427	355561	338114	627712	226216
Q9JHD2	Histone acetyltransferase KAT2A OS=Mus musculus OX=10090 GN=Kat2a PE=1 SV=2	93.3							576079	396261	550611	181541	202917	140905
A2AGT5	Cytoskeleton-associated protein 5 OS=Mus musculus OX=10090 GN=Ckap5 PE=1 SV=1	225.5	2.86056e+06	4.41849e+06	3.26334e+06	2.12223e+07	2.33071e+07	1.45922e+07	2.38427e+07	2.80177e+07	2.57796e+07	3.18286e+07	3.11807e+07	2.73424e+07
Q8CI11	Guanine nucleotide-binding protein-like 3 OS=Mus musculus OX=10090 GN=Gnl3 PE=1 SV=2	60.7	3.01829e+06	2.41338e+06	2.74242e+06	4.36339e+06	2.36928e+06	3.84628e+06	1.56992e+07	1.71526e+07	1.48681e+07	5.06544e+06	3.10322e+06	4.51491e+06
Q6PDQ2	Chromodomain-helicase-DNA-binding protein 4 OS=Mus musculus OX=10090 GN=Chd4 PE=1 SV=1	217.6	2.25474e+07	1.34414e+07	7.87749e+06	1.99501e+07	2.06295e+07	1.65133e+07	8.25149e+07	9.0058e+07	3.51864e+07	2.30727e+07	1.78808e+07	1.60092e+07
Q61578	NADPH:adrenodoxin oxidoreductase, mitochondrial OS=Mus musculus OX=10090 GN=Fdxr PE=1 SV=1	54.2							510474	479779	1.56542e+06	112667	471165	201087
P58252	Elongation factor 2 OS=Mus musculus OX=10090 GN=Eef2 PE=1 SV=2	95.3	3.61021e+08	3.45071e+08	4.22487e+08	6.75115e+08	7.63801e+08	6.91543e+08	6.34977e+08	7.19808e+08	7.16967e+08	2.7119e+08	2.83745e+08	2.55605e+08
Q8K2Q7	BRO1 domain-containing protein BROX OS=Mus musculus OX=10090 GN=Brox PE=1 SV=1	46.2	1.38133e+06	1.62211e+06	216766	8.56014e+06	5.42315e+06	5.35949e+06	3.45427e+06	1.68673e+06	3.08208e+06	6.43088e+06	3.34505e+06	3.74642e+06
P63330	Serine/threonine-protein phosphatase 2A catalytic subunit alpha isoform OS=Mus musculus OX=10090 GN=Ppp2ca PE=1 SV=1	35.6	552362	802453	1.46974e+06	3.06492e+06	1.99513e+06	3.5564e+06	2.44664e+06	3.95154e+06	5.85397e+06	2.83972e+06	1.77195e+06	3.28346e+06
E9Q634	Unconventional myosin-Ie OS=Mus musculus OX=10090 GN=Myo1e PE=1 SV=1	126.7	493612	93317.4	33365.6		281027	189045	2.68386e+06	3.34791e+06	2.15543e+06	583852	350674	436970
Q8VCQ3	Nuclear receptor-binding factor 2 OS=Mus musculus OX=10090 GN=Nrbf2 PE=1 SV=1	32.5	118332	107984	213892	221286		137363		91469.7	628973
Q6PIU9	Uncharacterized protein FLJ45252 homolog OS=Mus musculus OX=10090 PE=1 SV=2	37.7									109206
Q8CI33	CWF19-like protein 1 OS=Mus musculus OX=10090 GN=Cwf19l1 PE=1 SV=2	60.2	135112		102785			129797	116148	88487.4	105862
Q99K70	Ras-related GTP-binding protein C OS=Mus musculus OX=10090 GN=Rragc PE=1 SV=1	44.1	482017	288002	525273	2.83372e+06	2.37632e+06	2.22498e+06	1.39431e+06	1.42164e+06	1.06412e+06	1.77239e+06	1.78524e+06	1.18406e+06
Q9D1H7	Golgi to ER traffic protein 4 homolog OS=Mus musculus OX=10090 GN=Get4 PE=1 SV=2	36.5	1284137	1.45609e+06	1.81644e+06	3.4091e+06	1.62515e+06	2.82694e+06	7.94052e+06	1.01513e+07	8.28586e+06	2.57181e+06	3.26551e+06	3.16248e+06
Q08481	Platelet endothelial cell adhesion molecule OS=Mus musculus OX=10090 GN=Pecam1 PE=1 SV=1	81.2							38796.1		58122.5
Q9CS74	Protein ecdysoneless homolog OS=Mus musculus OX=10090 GN=Ecd PE=1 SV=2	71.7	326041	491744	437617	159482	243521	128783	3.75442e+06	3.37048e+06	3157414	1.20966e+06		1.62402e+06
Q9Z2Q2	Lysine-rich nucleolar protein 1 OS=Mus musculus OX=10090 GN=Knop1 PE=1 SV=2	53.8							388140	296444	224594		186256	284678
Q9DC40	Telomere length regulation protein TEL2 homolog OS=Mus musculus OX=10090 GN=Telo2 PE=1 SV=2	93.3							62445.4	79176.1	71074	23232.8	31287.4
Q8BH74	Nuclear pore complex protein Nup107 OS=Mus musculus OX=10090 GN=Nup107 PE=1 SV=1	106.7	2.66469e+06	1.91237e+06	1.24611e+06	200257	258944	242464	1.30414e+07	1.3819e+07	3.80768e+06	2.27211e+06	30695	164394
Q91YR1	Twinfilin-1 OS=Mus musculus OX=10090 GN=Twf1 PE=1 SV=2	40.1	3.1075e+06	4.041e+06	4.24431e+06	1.13974e+07	7.46977e+06	8.99866e+06	9.10716e+06	1.26614e+07	1.33898e+07	8.2763e+06	4.44737e+06	5.08764e+06
Q9WTQ5	A-kinase anchor protein 12 OS=Mus musculus OX=10090 GN=Akap12 PE=1 SV=1	180.6	2.63101e+07	3.68126e+07	1.69133e+07	1.7683e+07	1.59343e+07	2.56378e+07	6.90474e+07	8.60059e+07	7.94925e+07	9.83687e+06	9.32478e+06	1.90846e+07
Q923B0	Gamma-glutamylaminecyclotransferase OS=Mus musculus OX=10090 GN=Ggact PE=1 SV=1	17.1	251612	153176	225069				700692	988846	916854
P84078	ADP-ribosylation factor 1 OS=Mus musculus OX=10090 GN=Arf1 PE=1 SV=2	20.7	2.01243e+06	2291764	2.28509e+06	11321508	8566968	4322247	6.42677e+06	7683955	6010539	7.09957e+06	5188378	2.64618e+06
Q5RL79	Keratinocyte-associated protein 2 OS=Mus musculus OX=10090 GN=Krtcap2 PE=1 SV=2	14.7							425529	66067.9	264625	145216	145743
Q99LN9	Deoxyhypusine hydroxylase OS=Mus musculus OX=10090 GN=Dohh PE=1 SV=2	32.9	932160	2.01855e+06	197984	120852	179119	116540	4.08727e+06	6.25831e+06	5.01134e+06	55021.5	129769	998498
Q78HU3	Multivesicular body subunit 12A OS=Mus musculus OX=10090 GN=Mvb12a PE=1 SV=1	28.7							149501	202057	165488	73148.6		172826
Q9CR20	Immediate early response 3-interacting protein 1 OS=Mus musculus OX=10090 GN=Ier3ip1 PE=3 SV=1	9	102442	692963	335512	2.83521e+06	3.25068e+06	2.36589e+06	745701	1.01755e+06	1.05717e+06	431695	2.1875e+07	637881
P35585	AP-1 complex subunit mu-1 OS=Mus musculus OX=10090 GN=Ap1m1 PE=1 SV=3	48.5	2.68499e+06	1.86744e+06	1.67185e+06	12750208	1.12546e+07	1.32384e+07	3.5771e+06	3.67601e+06	4.5903e+06	5.8438e+06	3.71351e+06	5.14777e+06
Q3TQI7	Telomere length and silencing protein 1 homolog OS=Mus musculus OX=10090 PE=1 SV=2	33.5							881500	714021	727923	164943	269709	228231
Q99KX1	Myeloid leukemia factor 2 OS=Mus musculus OX=10090 GN=Mlf2 PE=1 SV=1	28	179972	178542	498855	538146	346799	405976	1.0243e+06	1.54908e+06	1.75679e+06	248125	400420	1.08066e+06
Q9CQE3	28S ribosomal protein S17, mitochondrial OS=Mus musculus OX=10090 GN=Mrps17 PE=1 SV=1	13.4	298613	294412	226840				941235	1.23338e+06	1.04352e+06
Q9D8Y0	EF-hand domain-containing protein D2 OS=Mus musculus OX=10090 GN=Efhd2 PE=1 SV=1	26.8	63613.3	47291.2	43607.3	244293	592370	243261	62041		72299.8	106336		147145
Q9ERF3	WD repeat-containing protein 61 OS=Mus musculus OX=10090 GN=Wdr61 PE=1 SV=1	33.8	3.64817e+06	1.06249e+06	3.6513e+06	1.88195e+06	2.37164e+06	2.30728e+06	9.98621e+06	1.27849e+07	1.03742e+07	1.82291e+06	2.54488e+06	1.67971e+06
Q5M956	BTB/POZ domain-containing protein KCTD1 OS=Mus musculus OX=10090 GN=Kctd1 PE=1 SV=1	29.4						67596
Q9DCG9	Multifunctional methyltransferase subunit TRM112-like protein OS=Mus musculus OX=10090 GN=Trmt112 PE=1 SV=1	14.1	742755	922469	1.2238e+06	1.78825e+06	1.25496e+06	1.10854e+06	4.08637e+06	5.19324e+06	4.13557e+06	1.6735e+06	1.0547e+06	1.19016e+06
A2A8Z1	Oxysterol-binding protein-related protein 9 OS=Mus musculus OX=10090 GN=Osbpl9 PE=1 SV=1	83.1							1.04116e+06	1.57774e+06	1.74342e+06	1.02333e+06	620501	107776
Q9R0M6	Ras-related protein Rab-9A OS=Mus musculus OX=10090 GN=Rab9a PE=1 SV=1	22.9		271904	248658		132885	286947	3.83548e+06	3.92059e+06	3.61619e+06	727316	262290	2.15135e+06
Q9WVG6	Histone-arginine methyltransferase CARM1 OS=Mus musculus OX=10090 GN=Carm1 PE=1 SV=2	65.8	3.9224e+06	1.66909e+06	1.79897e+06	5.62239e+06	6.4941e+06	5.52892e+06	7.51026e+06	8.21182e+06	7.22444e+06	3.70062e+06	3.97947e+06	4.13251e+06
P56383	ATP synthase F(0) complex subunit C2, mitochondrial OS=Mus musculus OX=10090 GN=Atp5mc2 PE=2 SV=2	15.5	605427	455996	356551	581194	936076	222993	1.4443e+06	1.73769e+06	729624	168382	507000	210619
P97377	Cyclin-dependent kinase 2 OS=Mus musculus OX=10090 GN=Cdk2 PE=1 SV=2	39	1.39746e+06		116521		597255	759072	6.736e+06	8.91389e+06	7.01613e+06	2919061	2.46542e+06	1.87756e+06
P54823	Probable ATP-dependent RNA helicase DDX6 OS=Mus musculus OX=10090 GN=Ddx6 PE=1 SV=1	54.2	9.12273e+06	6.94267e+06	6.3029e+06	2.62592e+07	2.73539e+07	2.04251e+07	3.26731e+07	3.33829e+07	2.86242e+07	2.30901e+07	2.17818e+07	1.79799e+07
Q8VIJ6	Splicing factor, proline- and glutamine-rich OS=Mus musculus OX=10090 GN=Sfpq PE=1 SV=1	75.4	1.90249e+07	1.78914e+07	1.00231e+07	2.53857e+07	2.3191e+07	3.04052e+07	4.01767e+07	4.54194e+07	2.41022e+07	1.04313e+07	1.20645e+07	1.44098e+07
P60335	Poly(rC)-binding protein 1 OS=Mus musculus OX=10090 GN=Pcbp1 PE=1 SV=1	37.5	3.10652e+07	4.10315e+07	4.56855e+07	7.98714e+07	7.37602e+07	7.47773e+07	9.74767e+07	1.3261e+08	1.05503e+08	4.57313e+07	4.29016e+07	4.13036e+07
Q9QXV0	ProSAAS OS=Mus musculus OX=10090 GN=Pcsk1n PE=1 SV=2	27.3				1.24652e+06	617579	582726	227077			1.48783e+06	711804	372370
Q62311	Transcription initiation factor TFIID subunit 6 OS=Mus musculus OX=10090 GN=Taf6 PE=1 SV=1	72.6	60869.3	94582.9	147043	579494	1.27665e+06	328040	450644	518487	563373	336062	1.17244e+06	747284
Q9D1G2	Phosphomevalonate kinase OS=Mus musculus OX=10090 GN=Pmvk PE=1 SV=3	21.9	506623	833628	816630	1.13534e+06	1.38214e+06	1.2317e+06	3.13092e+06	2.06787e+06	2.62379e+06	1.17996e+06	701031	890759
Q7TMR0	Lysosomal Pro-X carboxypeptidase OS=Mus musculus OX=10090 GN=Prcp PE=1 SV=2	55	393091	368223	451340	4.66069e+06	4.25756e+06	5.60405e+06	392848	206335	164408	558380	489220	642720
P84086	Complexin-2 OS=Mus musculus OX=10090 GN=Cplx2 PE=1 SV=1	15.4	3.77058e+06	4.0204e+06	10862866	5.36563e+06	6.04048e+06	8.8732e+06	9591057	10023354	24373212	3.57619e+06	2.62687e+06	3.36933e+06
P70371	Telomeric repeat-binding factor 1 OS=Mus musculus OX=10090 GN=Terf1 PE=1 SV=1	48.2							2.07714e+06	1.86681e+06	335662	99079.7	109140	3.95204e+06
P50171	Estradiol 17-beta-dehydrogenase 8 OS=Mus musculus OX=10090 GN=Hsd17b8 PE=1 SV=2	26.6	412432	368321	496929	1.3101e+06	1.71999e+06	1.4392e+06
Q8BVL3	Sorting nexin-17 OS=Mus musculus OX=10090 GN=Snx17 PE=1 SV=2	52.8					169230	142314	321495	481979	265155	501210	788594	372250
Q64012	RNA-binding protein Raly OS=Mus musculus OX=10090 GN=Raly PE=1 SV=3	33.2	1.25887e+06	1.22102e+06	763758	505227	336635	589887	4.20644e+06	3.95552e+06	1.30529e+06	133213	299719	350609
Q9D1D6	Collagen triple helix repeat-containing protein 1 OS=Mus musculus OX=10090 GN=Cthrc1 PE=2 SV=2	26.4				60552.2	55945.3	167476						168057
Q8C3I8	Protein HGH1 homolog OS=Mus musculus OX=10090 GN=Hgh1 PE=1 SV=1	42.9							219455	481107	794517	99167.1	107503	245666
Q3B7Z2	Oxysterol-binding protein 1 OS=Mus musculus OX=10090 GN=Osbp PE=1 SV=3	88.7	432347	478300	723043	5.18204e+06	3.57032e+06	2.85962e+06	1.09036e+06	1.07435e+06	1.45003e+06	2.07901e+06	2.16731e+06	996657
Q9CQC6	Basic leucine zipper and W2 domain-containing protein 1 OS=Mus musculus OX=10090 GN=Bzw1 PE=1 SV=1	48	7.47039e+06	6.50915e+06	7.31177e+06	2.26855e+07	1.99053e+07	2.08541e+07	3.26905e+07	3.17525e+07	3.26396e+07	2.42337e+07	1.75235e+07	1.57744e+07
Q8VI36	Paxillin OS=Mus musculus OX=10090 GN=Pxn PE=1 SV=1	64.4	1.23792e+06	723731	580813	661705	426389	1.32883e+06	1.15655e+07	7.82365e+06	8.92009e+06	1.19175e+06	1.46108e+06	2.47808e+06
Q3UHB1	5'-nucleotidase domain-containing protein 3 OS=Mus musculus OX=10090 GN=Nt5dc3 PE=1 SV=1	63.1	243976	186807	373723	3.0518e+06	247543	702214
Q5PSV9	Mediator of DNA damage checkpoint protein 1 OS=Mus musculus OX=10090 GN=Mdc1 PE=1 SV=1	184.6								83735	39633.6
P97329	Kinesin-like protein KIF20A OS=Mus musculus OX=10090 GN=Kif20a PE=1 SV=1	99.8							1.88482e+06	2.66594e+06			330097	520736
Q91VJ5	Polyglutamine-binding protein 1 OS=Mus musculus OX=10090 GN=Pqbp1 PE=1 SV=1	30.6	140457	136689	172814	233110	226752	337569	843687	1.83839e+06	609019	693715	261139	206074
P84091	AP-2 complex subunit mu OS=Mus musculus OX=10090 GN=Ap2m1 PE=1 SV=1	49.6	5.69777e+06	9.20991e+06	5.83939e+06	4.33137e+07	2.61315e+07	2.20459e+07	1.66421e+07	2.1741e+07	1.66483e+07	1.86881e+07	1.56975e+07	1.22334e+07
Q9D7M8	DNA-directed RNA polymerase II subunit RPB4 OS=Mus musculus OX=10090 GN=Polr2d PE=1 SV=2	16.3							1.8271e+06	940753	2.31546e+06	380990	261674	1037508
Q7TQK0	Cyclin-T2 OS=Mus musculus OX=10090 GN=Ccnt2 PE=1 SV=1	80.2							354156	354749	236587		5.06001e+06
P18654	Ribosomal protein S6 kinase alpha-3 OS=Mus musculus OX=10090 GN=Rps6ka3 PE=1 SV=2	83.6	1.25422e+06	1.4862e+06	714069	4.3863e+06	6.57148e+06	4.08075e+06	2.68163e+06	1.90492e+06	1.17679e+06	1.51701e+06	1.81949e+06	1.39743e+06
P12382	ATP-dependent 6-phosphofructokinase, liver type OS=Mus musculus OX=10090 GN=Pfkl PE=1 SV=4	85.3	2.18386e+07	2.09605e+07	1.90658e+07	1.35658e+08	1.43791e+08	1.43747e+08	3.33687e+07	3.65033e+07	3.31948e+07	4.28976e+07	4.2003e+07	5.23187e+07
Q9JKC6	Cell cycle exit and neuronal differentiation protein 1 OS=Mus musculus OX=10090 GN=Cend1 PE=1 SV=1	15	41488.1		43186.6	597826		89137.5
P09411	Phosphoglycerate kinase 1 OS=Mus musculus OX=10090 GN=Pgk1 PE=1 SV=4	44.5	1.04222e+08	1.08172e+08	1.36539e+08	1.01155e+09	1.2153e+09	1.15868e+09	1.48278e+08	1.60409e+08	1.76974e+08	2.67427e+08	3.22241e+08	3.2242e+08
Q9CQM9	Glutaredoxin-3 OS=Mus musculus OX=10090 GN=Glrx3 PE=1 SV=1	37.8	1.68492e+07	1.59528e+07	2.048e+07	4.64017e+07	6.11681e+07	4.4243e+07	4.48871e+07	4.68818e+07	4.9207e+07	2.53419e+07	3.34031e+07	1.97539e+07
Q7TNP2	Serine/threonine-protein phosphatase 2A 65 kDa regulatory subunit A beta isoform OS=Mus musculus OX=10090 GN=Ppp2r1b PE=1 SV=2	65.9	1.36249e+06	514708	1.67072e+06	399861	438027	828570	1.21451e+07	1.39048e+07	1.19365e+07	849183	996286	2.085e+06
Q8BMJ3	Eukaryotic translation initiation factor 1A, X-chromosomal OS=Mus musculus OX=10090 GN=Eif1ax PE=2 SV=3	16.5	2.09293e+06	858594	1.92966e+06	1.63154e+06	3.30182e+06	2.50937e+06	8.38971e+06	4.94571e+06	8.53043e+06	1.85482e+06	2.06485e+06	2.54502e+06
Q3UNH4	G protein-regulated inducer of neurite outgrowth 1 OS=Mus musculus OX=10090 GN=Gprin1 PE=1 SV=2	95.4				280351		87297.7				171949
Q9D666	SUN domain-containing protein 1 OS=Mus musculus OX=10090 GN=Sun1 PE=1 SV=2	101.9							1.11386e+06	649674	102174	257792	61348.1	114024
Q3U821	WD repeat-containing protein 75 OS=Mus musculus OX=10090 GN=Wdr75 PE=1 SV=1	94			47422.7		141560	32419.2	109554		160449	278687
Q62077	1-phosphatidylinositol 4,5-bisphosphate phosphodiesterase gamma-1 OS=Mus musculus OX=10090 GN=Plcg1 PE=1 SV=2	149.6	2.33086e+06	2.31315e+06	3.36223e+06	1.14309e+07	1.11971e+07	7.72746e+06	1.00068e+07	7.96588e+06	1.08558e+07	8.51434e+06	5.8275e+06	6.70044e+06
Q8R1U1	Conserved oligomeric Golgi complex subunit 4 OS=Mus musculus OX=10090 GN=Cog4 PE=1 SV=1	88.6	117619	123234	684954	622909	391296	176604	4.29645e+06	1.48209e+06	2.33629e+06	1.53305e+06	961413	307207
Q60598	Src substrate cortactin OS=Mus musculus OX=10090 GN=Cttn PE=1 SV=2	61.2	2.48539e+06	2490898	3.26319e+06	1.50573e+07	1.27194e+07	1.48294e+07	5.50423e+06	5.61798e+06	8.25983e+06	5.75576e+06	4.86298e+06	8.98972e+06
Q8BHD7	Polypyrimidine tract-binding protein 3 OS=Mus musculus OX=10090 GN=Ptbp3 PE=1 SV=1	56.7	1.36754e+06	475254	1.09973e+06	581206	942258	766546	3.71678e+06	1.93136e+06	2.86905e+06	271606	577909	538841
Q60872	Eukaryotic translation initiation factor 1A OS=Mus musculus OX=10090 GN=Eif1a PE=2 SV=3	16.5	5.92161e+06	3.16422e+06	3769104	3.14265e+06	2.31713e+06	4.31155e+06	1.33243e+07	1.17706e+07	1.101e+07	1.68044e+06	1.56208e+06	2.03757e+06
Q80Y44	Probable ATP-dependent RNA helicase DDX10 OS=Mus musculus OX=10090 GN=Ddx10 PE=1 SV=2	100.7			230467				1.58251e+06	1.48837e+06	491743		352235	180991
Q8VD75	Huntingtin-interacting protein 1 OS=Mus musculus OX=10090 GN=Hip1 PE=1 SV=2	115.1	53324.8	233476	137588	1.20647e+06	644392	791578	179776	316601	156312	434584	324428	156897
Q5PRF0	HEAT repeat-containing protein 5A OS=Mus musculus OX=10090 GN=Heatr5a PE=1 SV=2	219.8									126823
Q9CX34	Protein SGT1 homolog OS=Mus musculus OX=10090 GN=Sugt1 PE=1 SV=3	38.1	1.44031e+07	1.26299e+07	1.60585e+07	1.19772e+07	1.04135e+07	1.30671e+07	4.98169e+07	5.03945e+07	6.17265e+07	9.58081e+06	7.19909e+06	8.57983e+06
Q8CG76	Aflatoxin B1 aldehyde reductase member 2 OS=Mus musculus OX=10090 GN=Akr7a2 PE=1 SV=3	40.6	1.66961e+06	1.20583e+06	1.43788e+06	8.08304e+06	9.83787e+06	11767016	824718	1.56938e+06	2.14128e+06	1.50773e+06	1.24588e+06	3.25683e+06
P58389	Serine/threonine-protein phosphatase 2A activator OS=Mus musculus OX=10090 GN=Ptpa PE=1 SV=1	36.7	5.46316e+06	4.60354e+06	4.85299e+06	2.70566e+07	19864712	1.27619e+07	6.86667e+06	7.84509e+06	9.84298e+06	8.49624e+06	5.57093e+06	4.2977e+06
Q6P8I4	PEST proteolytic signal-containing nuclear protein OS=Mus musculus OX=10090 GN=Pcnp PE=1 SV=1	19	1.27661e+06	918786	949597	3.56923e+06	4.73732e+06	5.13027e+06	4.26827e+06	4.95332e+06	5.10822e+06	3.7758e+06	3.65194e+06	4.16241e+06
Q9EPK7	Exportin-7 OS=Mus musculus OX=10090 GN=Xpo7 PE=1 SV=3	123.7	6.57394e+06	1.15456e+07	5.68986e+06	1.50415e+07	1.69434e+07	1.26561e+07	1.88674e+07	1.72072e+07	1.98285e+07	8.01707e+06	8.06324e+06	5.04556e+06
Q9JIF0	Protein arginine N-methyltransferase 1 OS=Mus musculus OX=10090 GN=Prmt1 PE=1 SV=1	42.4	2.12923e+07	2.16433e+07	3.16099e+07	4.82483e+07	3.63929e+07	4.77786e+07	8.26436e+07	9.82357e+07	8.88748e+07	3.24274e+07	2.65286e+07	3.2597e+07
P62340	TATA box-binding protein-like protein 1 OS=Mus musculus OX=10090 GN=Tbpl1 PE=1 SV=1	20.9	166916		435226	1.46522e+06	1.08815e+06	1.02678e+06	75367.7	94194.2	104347	314193	145423	242703
Q7TT50	Serine/threonine-protein kinase MRCK beta OS=Mus musculus OX=10090 GN=Cdc42bpb PE=1 SV=2	194.6	899991	621254	865410	6.87256e+06	6.12968e+06	3.67762e+06	1.43908e+06	1.22592e+06	1.38176e+06	2.44252e+06	1.43486e+06	1.49221e+06
Q80UM3	N-alpha-acetyltransferase 15, NatA auxiliary subunit OS=Mus musculus OX=10090 GN=Naa15 PE=1 SV=1	100.9	8.5688e+06	1.04698e+07	1.34769e+07	2.14154e+07	2.70414e+07	2.29386e+07	2.94622e+07	3.18365e+07	3.66305e+07	1.20212e+07	1.54269e+07	1.36342e+07
Q922V4	Pleiotropic regulator 1 OS=Mus musculus OX=10090 GN=Plrg1 PE=1 SV=1	56.9	417776	363814	516351	273311	521739	187215	2.07239e+06	3.02114e+06	1.43172e+06	302900	211432	318783
P12025	Midkine OS=Mus musculus OX=10090 GN=Mdk PE=2 SV=2	15.4	374473	208019	763028	5.16249e+06	4.01408e+06	5.25236e+06	1.16736e+06	1.31377e+06	1.44982e+06	2.50781e+06	2.73643e+06	3.94481e+06
Q8VC88	Grancalcin OS=Mus musculus OX=10090 GN=Gca PE=1 SV=1	24.6							106034	256678	65638.9	327643
Q9WVF7	DNA polymerase epsilon catalytic subunit A OS=Mus musculus OX=10090 GN=Pole PE=1 SV=3	261.9							2.83668e+06	2.12338e+06	1.57579e+06	392433	699076	555835
Q9Z1Z2	Serine-threonine kinase receptor-associated protein OS=Mus musculus OX=10090 GN=Strap PE=1 SV=2	38.4	6.48377e+06	5.73858e+06	6.42673e+06	1.30252e+07	1.32027e+07	1.47766e+07	3.11468e+07	3.95316e+07	3.45959e+07	1.51972e+07	1.33992e+07	1.46738e+07
Q6P4T0	Autophagy-related protein 2 homolog A OS=Mus musculus OX=10090 GN=Atg2a PE=1 SV=2	210.8					145501	192451		226274	196232	171920	232347	70697.6
P59279	Ras-related protein Rab-2B OS=Mus musculus OX=10090 GN=Rab2b PE=1 SV=1	24.2				336946	216949	240046				244596	47917.6	111600
Q8R3G1	Nuclear inhibitor of protein phosphatase 1 OS=Mus musculus OX=10090 GN=Ppp1r8 PE=1 SV=1	38.5	543681	766686	879676	2.04865e+06	1.64864e+06	1.62409e+06	2.35797e+06	2.75815e+06	3.83176e+06	1335724	1.77335e+06	1.03241e+06
Q9QYJ0	DnaJ homolog subfamily A member 2 OS=Mus musculus OX=10090 GN=Dnaja2 PE=1 SV=1	45.7	6.10344e+06	4.92988e+06	5.69545e+06	5.38731e+06	6.14602e+06	5.22474e+06	2.61814e+07	2.9741e+07	2.27592e+07	6.17305e+06	4.48817e+06	4.23222e+06
Q3U319	E3 ubiquitin-protein ligase BRE1B OS=Mus musculus OX=10090 GN=Rnf40 PE=1 SV=2	113.9							410648	416160	430659	116848	57481.9	234950
Q80XI4	Phosphatidylinositol 5-phosphate 4-kinase type-2 beta OS=Mus musculus OX=10090 GN=Pip4k2b PE=1 SV=1	47.3	922297	1.45798e+06	224266	6.88779e+06	4.00761e+06	2.87952e+06	2.60865e+06	1.7331e+06	2.21847e+06	4.0965e+06	2.45598e+06	1.72112e+06
Q5XKN4	Protein jagunal homolog 1 OS=Mus musculus OX=10090 GN=Jagn1 PE=1 SV=2	21.1	167175	496017	332770	638587	873824	459569	529848	620403	832982	216760	305763	251444
P61205	ADP-ribosylation factor 3 OS=Mus musculus OX=10090 GN=Arf3 PE=2 SV=2	20.6	1.43641e+07	1.32336e+07	1.48077e+07	8.75168e+07	7.51196e+07	6.28413e+07	4.49745e+07	4.81322e+07	4.81631e+07	5.70134e+07	4.34176e+07	4.0329e+07
Q8BMP6	Golgi resident protein GCP60 OS=Mus musculus OX=10090 GN=Acbd3 PE=1 SV=3	60.1	309596	181084	131865	1.85628e+06	1.3959e+06	1.46542e+06	116848	264470	291293	141416	527083	403626
Q9R0P6	Signal peptidase complex catalytic subunit SEC11A OS=Mus musculus OX=10090 GN=Sec11a PE=1 SV=1	20.6	581668	471233	370568	1.77569e+06	2.30132e+06	1.7846e+06	2511144	2.69115e+06	1.17843e+06	1.54607e+06	1.71694e+06	1.40055e+06
Q8CEE6	PAS domain-containing serine/threonine-protein kinase OS=Mus musculus OX=10090 GN=Pask PE=1 SV=3	151.2							49975.8		65053.8
P61924	Coatomer subunit zeta-1 OS=Mus musculus OX=10090 GN=Copz1 PE=1 SV=1	20.2	2.44305e+06	2.3409e+06	1.5074e+06	8.62606e+06	9.53707e+06	5.10969e+06	4458875	5.85369e+06	3605820	2.85127e+06	3.32078e+06	3.10848e+06
Q8BSL7	ADP-ribosylation factor 2 OS=Mus musculus OX=10090 GN=Arf2 PE=1 SV=2	20.7				1.75384e+06	882381	787509		503248		1.85447e+06	1.19999e+06	625965
Q8K2D6	Deoxycytidylate deaminase OS=Mus musculus OX=10090 GN=Dctd PE=2 SV=1	20									152392
Q62203	Splicing factor 3A subunit 2 OS=Mus musculus OX=10090 GN=Sf3a2 PE=1 SV=2	49.9	2.5764e+06	1.78662e+06	2.03408e+06	3.02348e+06	2.81765e+06	3.10341e+06	3.77049e+06	4.76963e+06	1.23107e+06	105703	2.39601e+06	1.5799e+06
Q7TMY8	E3 ubiquitin-protein ligase HUWE1 OS=Mus musculus OX=10090 GN=Huwe1 PE=1 SV=5	482.3	1.32748e+07	1.21099e+07	1.69261e+07	2.82877e+07	4.10825e+07	2.96668e+07	4.36848e+07	4.48929e+07	4.73956e+07	1.84009e+07	2.08609e+07	1.95819e+07
Q9ES97	Reticulon-3 OS=Mus musculus OX=10090 GN=Rtn3 PE=1 SV=2	103.8	389317	371088	250517	9.21097e+06	1.51555e+07	1.11981e+07	805391	896843	960101	4.57772e+06	7.12787e+06	5.85133e+06
Q149F1	RNA pseudouridylate synthase domain-containing protein 2 OS=Mus musculus OX=10090 GN=Rpusd2 PE=1 SV=2	61.5	2.41977e+06	2.13451e+06	446288	229999	225947	219934	1.50395e+06	2.08074e+06	1.32785e+06	130951		71261.8
Q9ESW8	Pyroglutamyl-peptidase 1 OS=Mus musculus OX=10090 GN=Pgpep1 PE=1 SV=1	22.9	99594.1		182070	1.68071e+06	169470	1.15895e+06	1.55576e+06	1.3301e+06	1.13813e+06	2.45018e+06	2.19722e+06	4.18368e+06
Q61191	Host cell factor 1 OS=Mus musculus OX=10090 GN=Hcfc1 PE=1 SV=2	210.3	5.93328e+06	9.58689e+06	5.54019e+06	1.85371e+07	1.10779e+07	1.49482e+07	1.77442e+07	1.75435e+07	1.32641e+07	8.82235e+06	4.65362e+06	6.16441e+06
Q9QXS1	Plectin OS=Mus musculus OX=10090 GN=Plec PE=1 SV=3	533.9	2.736e+06	2.57764e+06	2.31838e+06	7.33398e+06	7.60292e+06	5.7515e+06	8.27918e+06	8.75492e+06	5.67167e+06	3.29174e+06	3.81087e+06	4.02457e+06
Q8BPB0	MOB kinase activator 1B OS=Mus musculus OX=10090 GN=Mob1b PE=1 SV=3	25.1	813670	331532	554867	1.6104e+06	3.02558e+06	1.94631e+06	1.3501e+06	3.86722e+06	1.61003e+06	1.3143e+06	2.15374e+06	1.1693e+06
Q9ER88	28S ribosomal protein S29, mitochondrial OS=Mus musculus OX=10090 GN=Dap3 PE=1 SV=1	44.7	1.04675e+06	888070	1.11712e+06		139746		5.29446e+06	6.35188e+06	4.36915e+06		180647
P61226	Ras-related protein Rap-2b OS=Mus musculus OX=10090 GN=Rap2b PE=1 SV=1	20.5								338114
Q9ERG2	Striatin-3 OS=Mus musculus OX=10090 GN=Strn3 PE=1 SV=1	87.1	301695	178940	406025	938894	1.21115e+06	1.41279e+06	514033	459073	657151	283718	283768	873681
O08528	Hexokinase-2 OS=Mus musculus OX=10090 GN=Hk2 PE=1 SV=1	102.5	2.73584e+07	2.14546e+07	2.93571e+07	1.57192e+07	1.81862e+07	1.6043e+07	1.13212e+08	1.21467e+08	1.28979e+08	1.53238e+07	1.27238e+07	1.47667e+07
Q8CCP0	Nuclear export mediator factor Nemf OS=Mus musculus OX=10090 GN=Nemf PE=1 SV=2	121.1	64846.9	64366.9	72125.8	83995.1		139651	749128	685751	1.26269e+06	91559.4	108474	234173
P61080	Ubiquitin-conjugating enzyme E2 D1 OS=Mus musculus OX=10090 GN=Ube2d1 PE=1 SV=1	16.6		171148	157050	1226030	830711	671496	257670	1.1757e+06	1.47899e+06	4.05554e+06	3.16404e+06	516899
Q05BC3	Echinoderm microtubule-associated protein-like 1 OS=Mus musculus OX=10090 GN=Eml1 PE=1 SV=1	89.6				187514	293639	205480					92918.1	423244
Q9D8V0	Minor histocompatibility antigen H13 OS=Mus musculus OX=10090 GN=Hm13 PE=1 SV=1	41.7			131316	331475	230513	408463	125468	285552	496969	753686	834333	419362
O70481	E3 ubiquitin-protein ligase UBR1 OS=Mus musculus OX=10090 GN=Ubr1 PE=1 SV=2	200.1	309357	346461	246627	949423	800058	734517	1.41983e+06	1.03823e+06	1.30872e+06	737051	809213	414605
Q6A078	Centrosomal protein of 290 kDa OS=Mus musculus OX=10090 GN=Cep290 PE=1 SV=2	288.9	500061	663721	285540	622689	741095	515935	1.21947e+06	1952409	699182	296936	404796	210807
P11679	Keratin, type II cytoskeletal 8 OS=Mus musculus OX=10090 GN=Krt8 PE=1 SV=4	54.5					234285
Q61699	Heat shock protein 105 kDa OS=Mus musculus OX=10090 GN=Hsph1 PE=1 SV=2	96.3	2.07028e+07	2.33731e+07	2.69666e+07	3.09496e+07	2.92559e+07	3.33413e+07	5.83207e+07	7.16439e+07	7.66514e+07	1.82775e+07	1.37701e+07	1.77907e+07
Q8CIM8	Integrator complex subunit 4 OS=Mus musculus OX=10090 GN=Ints4 PE=1 SV=1	108.1							1.45115e+06	1.11246e+06	566289	513789	248242	155140
Q6NZJ6	Eukaryotic translation initiation factor 4 gamma 1 OS=Mus musculus OX=10090 GN=Eif4g1 PE=1 SV=1	176	2.48923e+07	1.81333e+07	2.11671e+07	2.14386e+07	4.39925e+07	2.70499e+07	9.89047e+07	1.27933e+08	9.67711e+07	2.53039e+07	3.15832e+07	2.45336e+07
Q8BIF0	CD99 antigen-like protein 2 OS=Mus musculus OX=10090 GN=Cd99l2 PE=1 SV=1	25.4				400554	228412	275741			79582.8	302099	101723	173830
Q9JII6	Alcohol dehydrogenase [NADP(+)] OS=Mus musculus OX=10090 GN=Akr1a1 PE=1 SV=3	36.6	7.42172e+06	6.32244e+06	1.0746e+07	3.46751e+07	3.95217e+07	2.45475e+07	1.51501e+07	1.84145e+07	1.88841e+07	1.13757e+07	1.07746e+07	1.71458e+07
Q61151	Serine/threonine-protein phosphatase 2A 56 kDa regulatory subunit epsilon isoform OS=Mus musculus OX=10090 GN=Ppp2r5e PE=1 SV=3	54.7	1.32798e+06	1.60752e+06	249806	8.01498e+06	5.79517e+06	3.76805e+06	4.91205e+06	3.09885e+06	4.73258e+06	6.51182e+06	5.20679e+06	4.15999e+06
P48771	Cytochrome c oxidase subunit 7A2, mitochondrial OS=Mus musculus OX=10090 GN=Cox7a2 PE=1 SV=2	9.3	518851	664748	1.38713e+06	556913	403852	749585	6.61948e+06	6.94112e+06	5.6384e+06	1.2188e+06	965545	459806
Q62167	ATP-dependent RNA helicase DDX3X OS=Mus musculus OX=10090 GN=Ddx3x PE=1 SV=3	73.1	2.74983e+07	2.71764e+07	1.21908e+07	1.2734e+07	1.84324e+07	1.66573e+07	1.2901e+08	1.43958e+08	6.78618e+07	1.23504e+07	1.77145e+07	1.4649e+07
Q9CQA1	Trafficking protein particle complex subunit 5 OS=Mus musculus OX=10090 GN=Trappc5 PE=1 SV=1	20.8								1.44594e+06	559405	1105207	32833.1
Q9WTK3	Glycosylphosphatidylinositol anchor attachment 1 protein OS=Mus musculus OX=10090 GN=Gpaa1 PE=1 SV=3	67.9			509215	289112			174203	55481.7	209659	86773.7
Q924T7	E3 ubiquitin-protein ligase RNF31 OS=Mus musculus OX=10090 GN=Rnf31 PE=1 SV=2	119.2									263666
P32067	Lupus La protein homolog OS=Mus musculus OX=10090 GN=Ssb PE=1 SV=1	47.7	1.87856e+07	1.82011e+07	2.33757e+07	3.27355e+07	4.21908e+07	3.85713e+07	5.067e+07	5.57843e+07	5.61831e+07	1.79165e+07	2.05855e+07	1.69436e+07
P62627	Dynein light chain roadblock-type 1 OS=Mus musculus OX=10090 GN=Dynlrb1 PE=1 SV=3	11	536234	694332	989793	9.74333e+06	9.03608e+06	9.82792e+06	2.23329e+06	2.17582e+06	3.32304e+06	7.10918e+06	5.02564e+06	6.1927e+06
Q99KR3	Endoribonuclease LACTB2 OS=Mus musculus OX=10090 GN=Lactb2 PE=1 SV=1	32.7	786425	343558	1.14765e+06	442833	881036	1.57129e+06	3.15459e+06	3.1824e+06	2.70405e+06	473951	1.52208e+06	433864
P22682	E3 ubiquitin-protein ligase CBL OS=Mus musculus OX=10090 GN=Cbl PE=1 SV=3	100.5	203132	547774		506642	1.52021e+06		1.02256e+06	2.11047e+06	1.31685e+06	479117	504390	843008
Q61584	Fragile X mental retardation syndrome-related protein 1 OS=Mus musculus OX=10090 GN=Fxr1 PE=1 SV=2	76.2	1.3458e+07	1.5419e+07	7.48745e+06	5.88329e+06	7.72659e+06	8.51596e+06	30421832	34676115	2.02579e+07	2.08504e+06	4.44001e+06	3.32632e+06
Q9WVM1	Rac GTPase-activating protein 1 OS=Mus musculus OX=10090 GN=Racgap1 PE=1 SV=1	70.1		1.52295e+06					2.90363e+06	5.10645e+06	2.01416e+06	888496	76593	52615.5
Q4KMM3	Oxidation resistance protein 1 OS=Mus musculus OX=10090 GN=Oxr1 PE=1 SV=3	95.9							145517		144622			71593.7
Q9D0M2	Cell division cycle-associated protein 7 OS=Mus musculus OX=10090 GN=Cdca7 PE=1 SV=1	43.8							71503.3	77186.7
Q8N9S3	Activator of 90 kDa heat shock protein ATPase homolog 2 OS=Mus musculus OX=10090 GN=Ahsa2 PE=1 SV=2	37.6	58106.5	67045.4	936680	1.01223e+06	995507	468886	1.71483e+06	2.43291e+06	2.57321e+06	2062771	2.20763e+06	1.73225e+06
Q9CQM2	ER lumen protein-retaining receptor 2 OS=Mus musculus OX=10090 GN=Kdelr2 PE=1 SV=1	24.4	918821	964267	692030		3201964	1.60123e+06	2.34873e+06	4.06816e+06	1937148		1.2715e+06	1.00218e+06
Q8BW10	RNA-binding protein NOB1 OS=Mus musculus OX=10090 GN=Nob1 PE=1 SV=1	45.4	390511	338131	390761		23694.8	113311	3.26196e+06	5.19299e+06	3.16001e+06	19937.9	63626.4	184357
Q6NZR2	Myb/SANT-like DNA-binding domain-containing protein 2 OS=Mus musculus OX=10090 GN=Msantd2 PE=1 SV=1	61.3	826607		296043	196521			283414	310645	276531
Q9WVR4	Fragile X mental retardation syndrome-related protein 2 OS=Mus musculus OX=10090 GN=Fxr2 PE=1 SV=1	73.7	1.04519e+06	768976	608739	1.16877e+06	1.85757e+06	1.53292e+06	4.88803e+06	4.71721e+06	3.20758e+06	1.60151e+06	1.02694e+06	1.71549e+06
Q9DBR3	Armadillo repeat-containing protein 8 OS=Mus musculus OX=10090 GN=Armc8 PE=1 SV=2	75.3	1.29796e+06	698525	866459	1.17966e+06	2.57554e+06	2.06135e+06	3.53939e+06	5.93689e+06	5.08631e+06	1.70329e+06	1.67157e+06	1.67086e+06
Q9DBX3	Sushi domain-containing protein 2 OS=Mus musculus OX=10090 GN=Susd2 PE=1 SV=1	90.6								315922
Q8C3R1	BRCA1-associated ATM activator 1 OS=Mus musculus OX=10090 GN=Brat1 PE=1 SV=1	89	378130	133066	320915	1.40521e+06	94102.1	473271	2.95409e+06	2.30364e+06	2.49645e+06	1.09234e+06	385964	871059
Q62108	Disks large homolog 4 OS=Mus musculus OX=10090 GN=Dlg4 PE=1 SV=1	80.4				596341	102676	173405				277361		126829
Q6PHS9	Voltage-dependent calcium channel subunit alpha-2/delta-2 OS=Mus musculus OX=10090 GN=Cacna2d2 PE=1 SV=1	130.3	227910			483782	111564
Q9D0J4	ADP-ribosylation factor-like protein 2 OS=Mus musculus OX=10090 GN=Arl2 PE=1 SV=1	20.9	649073	784424	93507.8	2.66896e+06	1.86749e+06	2537367	1.68524e+06	1.33992e+06	1.33654e+06	1.90372e+06	1.64863e+06	1.41418e+06
A2AKX3	Probable helicase senataxin OS=Mus musculus OX=10090 GN=Setx PE=1 SV=1	297.4							61237.7		67646
Q78PG9	Coiled-coil domain-containing protein 25 OS=Mus musculus OX=10090 GN=Ccdc25 PE=1 SV=1	24.5	274088	270071	286364	461616	591291	470171	837926	1.10514e+06	1.04446e+06	374470	420446	204440
P61027	Ras-related protein Rab-10 OS=Mus musculus OX=10090 GN=Rab10 PE=1 SV=1	22.5	2.17126e+06	967826	1.58817e+06	1.0113e+07	5.64721e+06	6.91156e+06	4.94157e+06	4.76479e+06	5.74726e+06	4.55649e+06	5.49183e+06	3.5124e+06
Q9EPK6	Nucleotide exchange factor SIL1 OS=Mus musculus OX=10090 GN=Sil1 PE=1 SV=2	52.4				555838	1.0865e+06	427406	45675.2		154492	457269	895584	615095
Q9WVA4	Transgelin-2 OS=Mus musculus OX=10090 GN=Tagln2 PE=1 SV=4	22.4	3.21992e+07	2.42666e+07	4.04438e+07	2.92492e+07	3.16006e+07	3.52175e+07	7.24151e+07	7.18146e+07	7.49847e+07	1.30955e+07	1.21574e+07	1.37367e+07
Q91YQ5	Dolichyl-diphosphooligosaccharide--protein glycosyltransferase subunit 1 OS=Mus musculus OX=10090 GN=Rpn1 PE=1 SV=1	68.5	1.54765e+07	1.45572e+07	1.21549e+07	2.71612e+07	2.62267e+07	2.54643e+07	2.88332e+07	3.48571e+07	2.78246e+07	1.06485e+07	9.31794e+06	1.01397e+07
Q505F5	Leucine-rich repeat-containing protein 47 OS=Mus musculus OX=10090 GN=Lrrc47 PE=1 SV=1	63.6	3.94978e+06	5.269e+06	7.18636e+06	1.36944e+07	1.54388e+07	1.05979e+07	1.4597e+07	1.77319e+07	2.93367e+07	4.73825e+06	3.23834e+07	4.01374e+06
Q8C6E0	Cilia- and flagella-associated protein 36 OS=Mus musculus OX=10090 GN=Cfap36 PE=1 SV=1	39.6		168878	164286	258227	493664	550804	356427	420179	360926	417612	468398	349643
Q8R001	Microtubule-associated protein RP/EB family member 2 OS=Mus musculus OX=10090 GN=Mapre2 PE=1 SV=1	36.9	239783	246861	1.03091e+06	1.29519e+07	1.17739e+07	1.21617e+07	1.39595e+06	1.45952e+06	1.82034e+06	9.81888e+06	8.33095e+06	7.4508e+06
O08601	Microsomal triglyceride transfer protein large subunit OS=Mus musculus OX=10090 GN=Mttp PE=1 SV=2	99		60617.3			1.80958e+06	1.13446e+06					327876	58459.7
P24788	Cyclin-dependent kinase 11B OS=Mus musculus OX=10090 GN=Cdk11b PE=1 SV=2	91.5	257140	305878	138094	201133	133560		3.28341e+06	3.81922e+06	2.43457e+06	86360	41642.6	1.45459e+06
Q9CRC0	Vitamin K epoxide reductase complex subunit 1 OS=Mus musculus OX=10090 GN=Vkorc1 PE=1 SV=1	17.8	561728	241128	687678	1.56782e+06	1.65134e+06	688482	930146	559488	1.18902e+06	510662	860407	143349
Q9JIF7	Coatomer subunit beta OS=Mus musculus OX=10090 GN=Copb1 PE=1 SV=1	107	9.76192e+06	9.60908e+06	1.46749e+07	3.98587e+07	3.82693e+07	3.53578e+07	2.61187e+07	2.80749e+07	3.54607e+07	1.76004e+07	1.67568e+07	1.83157e+07
P54071	Isocitrate dehydrogenase [NADP], mitochondrial OS=Mus musculus OX=10090 GN=Idh2 PE=1 SV=3	50.9	7.09551e+06	6.94473e+06	9.72476e+06	5.02831e+07	6.06245e+07	6.37403e+07	1.07367e+07	1.1318e+07	1.54167e+07	1.17562e+07	1.79765e+07	1.90195e+07
P14094	Sodium/potassium-transporting ATPase subunit beta-1 OS=Mus musculus OX=10090 GN=Atp1b1 PE=1 SV=1	35.2	2.16707e+06	1.58142e+06	2.2894e+06	4.86459e+06	3.07084e+06	3.42982e+06	7.50245e+06	6.2819e+06	8.06261e+06	4.60145e+06	1.35343e+06	2.10403e+06
P12960	Contactin-1 OS=Mus musculus OX=10090 GN=Cntn1 PE=1 SV=1	113.3				486465			382470	379694	378578	461953	306532	213081
Q9CR21	Acyl carrier protein, mitochondrial OS=Mus musculus OX=10090 GN=Ndufab1 PE=1 SV=1	17.4	1.89473e+06	1.45842e+06	1.69179e+06	3.9137e+06	6.00916e+06	4.68878e+06	5.19656e+06	4.45536e+06	4.42099e+06	3.10221e+06	2.44011e+06	1.67863e+06
Q9CQP3	Coiled-coil-helix-coiled-coil-helix domain-containing protein 5 OS=Mus musculus OX=10090 GN=Chchd5 PE=1 SV=1	12.3	174927	215382	140461	350582	115568	241270	1.42812e+06	1.15131e+06	533199	1.15074e+06	635198
Q8BKS9	Pumilio homolog 3 OS=Mus musculus OX=10090 GN=Pum3 PE=1 SV=2	72.8							458732	1.06388e+06	141229	136977	852206
Q9WV92	Band 4.1-like protein 3 OS=Mus musculus OX=10090 GN=Epb41l3 PE=1 SV=1	103.3			112201	1.30606e+06	1.15233e+06	532263				149401	105015	121431
Q9CQJ2	PIH1 domain-containing protein 1 OS=Mus musculus OX=10090 GN=Pih1d1 PE=1 SV=1	32.2	890510					136876	430333	441390	544091		111763	170385
Q9D6M3	Mitochondrial glutamate carrier 1 OS=Mus musculus OX=10090 GN=Slc25a22 PE=1 SV=1	34.6							382580	247503		194698
A2AI05	NADPH-dependent diflavin oxidoreductase 1 OS=Mus musculus OX=10090 GN=Ndor1 PE=2 SV=1	67.1							507658	631478	251591	499679		202085
P56391	Cytochrome c oxidase subunit 6B1 OS=Mus musculus OX=10090 GN=Cox6b1 PE=1 SV=2	10.1	7.41463e+06	6.03948e+06	5.57465e+06	3.78891e+06	2.47935e+06	3.31944e+06	2.54151e+07	2.36804e+07	1.97714e+07	2450399	1.72684e+06	1.83563e+06
Q8R1S9	Sodium-coupled neutral amino acid transporter 4 OS=Mus musculus OX=10090 GN=Slc38a4 PE=1 SV=1	60.4	433457	194617	257577		173962		7.44949e+06	9.23488e+06	7442283	257455	170101	108462
P62821	Ras-related protein Rab-1A OS=Mus musculus OX=10090 GN=Rab1A PE=1 SV=3	22.7	1.57134e+07	1.34717e+07	1.61763e+07	7.45374e+07	5.93148e+07	4.79027e+07	5.16039e+07	5.12571e+07	4.97677e+07	4.26777e+07	3.26299e+07	3.04451e+07
Q6ZQ58	La-related protein 1 OS=Mus musculus OX=10090 GN=Larp1 PE=1 SV=3	121.1	1.46546e+06	1.75878e+06	1.59553e+06	1.56364e+06	1.96521e+06	1.85313e+06	1.35578e+07	1.77436e+07	1.29552e+07	4.14668e+06	2.44675e+06	2.20832e+06
P09055	Integrin beta-1 OS=Mus musculus OX=10090 GN=Itgb1 PE=1 SV=1	88.2	2.71788e+06	2.33079e+06	3.8617e+06	4.34027e+06	6.27954e+06	6.00313e+06	2.09039e+07	2.41485e+07	1.93499e+07	6.06873e+06	7.16587e+06	7.79851e+06
Q9CWW6	Peptidyl-prolyl cis-trans isomerase NIMA-interacting 4 OS=Mus musculus OX=10090 GN=Pin4 PE=1 SV=1	13.8	1.57777e+06	686410	2002597	2.57495e+06	2.64369e+06	3.06228e+06	3.14502e+06	3.45019e+06	3.58224e+06	1.30908e+06	1.04125e+06	1.41741e+06
Q7TPV4	Myb-binding protein 1A OS=Mus musculus OX=10090 GN=Mybbp1a PE=1 SV=2	151.9	5.50444e+07	4.9183e+07	2.27623e+07	5.30655e+06	1.02569e+07	9.23548e+06	1.56366e+08	1.80044e+08	6.46632e+07	4.66664e+06	4.3926e+06	3.7362e+06
Q91V92	ATP-citrate synthase OS=Mus musculus OX=10090 GN=Acly PE=1 SV=1	119.7	3.25184e+07	3.26325e+07	3.65396e+07	1.5031e+08	1.45372e+08	1.3113e+08	1.18693e+08	1.43908e+08	1.18511e+08	9.90066e+07	8.55598e+07	8.97616e+07
P35803	Neuronal membrane glycoprotein M6-b OS=Mus musculus OX=10090 GN=Gpm6b PE=1 SV=2	36.2		91436.6		2.13025e+06	869633	2.63378e+06	336929	545003		2.00768e+06	2.13544e+06	2.79181e+06
Q8K341	Alpha-tubulin N-acetyltransferase 1 OS=Mus musculus OX=10090 GN=Atat1 PE=1 SV=1	47.1			53026	5.27988e+06	4.49014e+06	2.96116e+06		967322	66211.5	6.50993e+06	3.76446e+06	3.84582e+06
P97376	Protein FRG1 OS=Mus musculus OX=10090 GN=Frg1 PE=1 SV=2	29.1	204710	269921	496585	314828	478389	364039	3.95053e+06	4.34783e+06	3.70822e+06	2.67432e+06	74010.3	3.25172e+06
Q8BJL1	F-box only protein 30 OS=Mus musculus OX=10090 GN=Fbxo30 PE=1 SV=2	82.6	321080		94559.1		306509	300361	2.61592e+06	1.11185e+06	2.26517e+06	456301	647555	483956
Q02053	Ubiquitin-like modifier-activating enzyme 1 OS=Mus musculus OX=10090 GN=Uba1 PE=1 SV=1	117.7	7.11763e+07	6.0455e+07	7.36392e+07	4.69004e+08	3.83639e+08	2.78432e+08	1.7977e+08	1.76008e+08	1.88648e+08	2.11386e+08	1.70524e+08	1.31795e+08
Q91V41	Ras-related protein Rab-14 OS=Mus musculus OX=10090 GN=Rab14 PE=1 SV=3	23.9	2.30242e+06	2.00406e+06	2.67929e+06	2.66853e+07	2.32291e+07	1.67508e+07	8.30589e+06	9.08412e+06	8.44592e+06	1.6085e+07	1.49212e+07	1.12133e+07
Q91WN1	DnaJ homolog subfamily C member 9 OS=Mus musculus OX=10090 GN=Dnajc9 PE=1 SV=2	30	1.3938e+06	1.32463e+06	1.16025e+06	2.93796e+06	4.3647e+06	4.43294e+06	3.88108e+06	4.00299e+06	4.08871e+06	1.32916e+06	2.38039e+06	2.67757e+06
Q8BG79	CWF19-like protein 2 OS=Mus musculus OX=10090 GN=Cwf19l2 PE=1 SV=1	103.1							112001	49503.6	59522.1	55711.8
Q8BZW8	NHL repeat-containing protein 2 OS=Mus musculus OX=10090 GN=Nhlrc2 PE=1 SV=1	78.4	810228	1.37466e+06	42165.9	1.42854e+06	1.836e+06	513080	585181	584814	147791	215324	262836	128368
P63017	Heat shock cognate 71 kDa protein OS=Mus musculus OX=10090 GN=Hspa8 PE=1 SV=1	70.8	3.7325e+08	3.93531e+08	4.20507e+08	7.52769e+08	8.37626e+08	6.75664e+08	1.07698e+09	1.37839e+09	1.17307e+09	4.24921e+08	3.88029e+08	3.64623e+08
Q8CBE3	WD repeat-containing protein 37 OS=Mus musculus OX=10090 GN=Wdr37 PE=1 SV=1	55	2.75349e+06		304481	8.1353e+06	5.535e+06	6.24669e+06	186474	324783	338360	3.33956e+06	1.33052e+06	761876
Q8CG48	Structural maintenance of chromosomes protein 2 OS=Mus musculus OX=10090 GN=Smc2 PE=1 SV=2	134.2	9.08254e+06	7.75775e+06	1.14121e+07	5.05011e+06	1.03477e+07	1.15651e+07	2.68391e+07	2.68888e+07	2.8204e+07	3.53132e+06	3.98755e+06	5.37709e+06
Q8VCN5	Cystathionine gamma-lyase OS=Mus musculus OX=10090 GN=Cth PE=1 SV=1	43.5	1.0541e+07	8.44039e+06	1.19973e+07	902296	1.43651e+06	2.61909e+06	2.60639e+07	2.70532e+07	2.67365e+07	347679	1.00865e+06	845720
Q8R323	Replication factor C subunit 3 OS=Mus musculus OX=10090 GN=Rfc3 PE=1 SV=1	40.5	1.27738e+06	764367	1.06029e+06		710245	507727	6.81717e+06	8.51151e+06	5.93736e+06	383718	59387.5	418972
P97494	Glutamate--cysteine ligase catalytic subunit OS=Mus musculus OX=10090 GN=Gclc PE=1 SV=4	72.5	1.58635e+06	690167	1.78043e+06	3.17985e+06	3.64312e+06	2.60691e+06	1.83725e+06	2.52339e+06	3.78772e+06	1.65577e+06	1.03799e+06	781331
P48678	Prelamin-A/C OS=Mus musculus OX=10090 GN=Lmna PE=1 SV=2	74.2	3.22998e+06	2.1934e+06	588660	476986	103144	217813	2.1371e+07	1.96862e+07	1.71666e+06	632798	419784	34461.7
P61922	4-aminobutyrate aminotransferase, mitochondrial OS=Mus musculus OX=10090 GN=Abat PE=1 SV=1	56.4	482817	475666	644520	3.52848e+07	1.67462e+07	1.46476e+07	695533	680213	1.83263e+06	1.08361e+07	6.97013e+06	3.31001e+06
Q02248	Catenin beta-1 OS=Mus musculus OX=10090 GN=Ctnnb1 PE=1 SV=1	85.4	3.87927e+06	6.89892e+06	5.5812e+06	1.26713e+07	7.39774e+06	1.49399e+07	3.76507e+07	5.04661e+07	2.88402e+07	1.43086e+07	1.32758e+07	1.33305e+07
Q8K224	RNA cytidine acetyltransferase OS=Mus musculus OX=10090 GN=Nat10 PE=1 SV=1	115.3	1.14714e+06	849354	369346	497767	222830	316120	8.11629e+06	4.1166e+06	896580	669628	144143	148732
Q8BFY9	Transportin-1 OS=Mus musculus OX=10090 GN=Tnpo1 PE=1 SV=2	102.3	1.1554e+07	1.15224e+07	1.41949e+07	2.2028e+07	2.83546e+07	2.44863e+07	5.57758e+07	6.05322e+07	5.90803e+07	1.98818e+07	1.93681e+07	2.05701e+07
Q8BHL8	Proteasome inhibitor PI31 subunit OS=Mus musculus OX=10090 GN=Psmf1 PE=1 SV=1	29.6	758436		350738	471246	570431	586571	904959	730118	1.17673e+06	710162	437370	663732
Q8VDN2	Sodium/potassium-transporting ATPase subunit alpha-1 OS=Mus musculus OX=10090 GN=Atp1a1 PE=1 SV=1	112.9	1.77941e+07	1.7827e+07	2.05298e+07	4.12805e+07	2.62279e+07	3.73369e+07	4.42523e+07	4.44243e+07	4.65323e+07	1.69643e+07	9.86086e+06	1.65674e+07
P11438	Lysosome-associated membrane glycoprotein 1 OS=Mus musculus OX=10090 GN=Lamp1 PE=1 SV=2	43.8	3.23063e+06	2.54692e+06	719730	3.37938e+06	3.7125e+06	3.82308e+06	6.11166e+06	7.56107e+06	6.59937e+06	2.1064e+06	2.23816e+06	2.53958e+06
O89086	RNA-binding protein 3 OS=Mus musculus OX=10090 GN=Rbm3 PE=1 SV=1	16.6	7243116	1.26259e+07	3.45569e+06	7.10733e+06	3.93547e+06	3.81774e+06	2.52378e+07	4.08413e+07	1.01814e+07	3.00296e+06	2.34527e+06	2.42545e+06
P48025	Tyrosine-protein kinase SYK OS=Mus musculus OX=10090 GN=Syk PE=1 SV=2	71.3									207967
Q9R0Q7	Prostaglandin E synthase 3 OS=Mus musculus OX=10090 GN=Ptges3 PE=1 SV=1	18.7	42652316	4.12451e+07	4.75513e+07	8.15892e+07	9.15357e+07	5.17489e+07	1.20794e+08	1.18781e+08	1.24225e+08	3.39452e+07	3.70673e+07	3.14187e+07
P62075	Mitochondrial import inner membrane translocase subunit Tim13 OS=Mus musculus OX=10090 GN=Timm13 PE=1 SV=1	10.5	2.58728e+06	2.11719e+06	2.86269e+06	3.16744e+06	4.71497e+06	4150678	9.36465e+06	8.86705e+06	9.19293e+06	2.32393e+06	2.35424e+06	2.64777e+06
P55937	Golgin subfamily A member 3 OS=Mus musculus OX=10090 GN=Golga3 PE=1 SV=3	167.1							136582		157178		49608.6
Q61207	Prosaposin OS=Mus musculus OX=10090 GN=Psap PE=1 SV=2	61.4	3.16354e+06	3.85913e+06	4.5071e+06	1.48134e+08	1.07499e+08	1.0901e+08	8.38101e+06	8.44939e+06	9.18044e+06	5.36486e+07	4.17603e+07	4.38155e+07
Q7TPM6	Fibronectin type III and SPRY domain-containing protein 1 OS=Mus musculus OX=10090 GN=Fsd1 PE=1 SV=1	55.5	69218.4		1.16384e+06	3.26078e+06	1.97326e+06	1.1774e+06	552206	61614.5	56282.3	941974	724659	107848
Q99KI3	ER membrane protein complex subunit 3 OS=Mus musculus OX=10090 GN=Emc3 PE=1 SV=3	30	700556	758621		255906	351591	140529	313624	566493	826632	271100	54855.8	125448
Q99LJ1	Tissue alpha-L-fucosidase OS=Mus musculus OX=10090 GN=Fuca1 PE=1 SV=1	52.2		199541	295252	9.94302e+06	6346291	4.24205e+06		217054	294131	2.02788e+06	2.0004e+06	695489
P05064	Fructose-bisphosphate aldolase A OS=Mus musculus OX=10090 GN=Aldoa PE=1 SV=2	39.3	1.23028e+08	1.35409e+08	1.44133e+08	6.26554e+08	6.91531e+08	6.03382e+08	2.1707e+08	2.76027e+08	2.4684e+08	2.04817e+08	1.92841e+08	1.92964e+08
Q62448	Eukaryotic translation initiation factor 4 gamma 2 OS=Mus musculus OX=10090 GN=Eif4g2 PE=1 SV=2	102	6.84048e+06	3.93371e+06	5.35001e+06	9.39255e+06	1.46454e+07	9.68078e+06	2.91998e+07	3.39224e+07	2.23159e+07	9.55843e+06	1.0584e+07	9.56249e+06
P24270	Catalase OS=Mus musculus OX=10090 GN=Cat PE=1 SV=4	59.8	2.04888e+06	2.74532e+06	2.49015e+06	1.29738e+07	1.25878e+07	1.14526e+07	1.03353e+07	1.20222e+07	1.10903e+07	1.06373e+07	7.97766e+06	1.0231e+07
Q6ZPJ3	(E3-independent) E2 ubiquitin-conjugating enzyme UBE2O OS=Mus musculus OX=10090 GN=Ube2o PE=1 SV=3	140.7	2.79114e+06	2.60012e+06	1.5312e+06	1.30196e+07	9.57378e+06	5.62051e+06	5.89603e+06	6.08622e+06	6.97777e+06	6.41061e+06	3.17224e+06	3.60995e+06
P29351	Tyrosine-protein phosphatase non-receptor type 6 OS=Mus musculus OX=10090 GN=Ptpn6 PE=1 SV=2	67.5	53731.4		252984				4.61016e+06	5.51753e+06	2.80835e+06	829383	1.00972e+06
Q921Z5	Tumor necrosis factor alpha-induced protein 8 OS=Mus musculus OX=10090 GN=Tnfaip8 PE=1 SV=1	22.9		104094	242899	729393	1.83404e+06	1.09582e+06		223082	596535	177121	776285	551884
Q9CQU5	ZW10 interactor OS=Mus musculus OX=10090 GN=Zwint PE=1 SV=1	28.7	32388.9	38982.9		79466.8	97428.3		3.39662e+06	4.13158e+06	6.29307e+06	1.56211e+06	1.39966e+06	1.86402e+06
Q9WVA3	Mitotic checkpoint protein BUB3 OS=Mus musculus OX=10090 GN=Bub3 PE=1 SV=2	36.9	1.63548e+06	2.28299e+06	2.20196e+06	6.86507e+06	5.16708e+06	6.17763e+06	1.12286e+07	1.28297e+07	9.6297e+06	5.20308e+06	8.161e+06	3.96216e+06
Q9D7E3	Esterase OVCA2 OS=Mus musculus OX=10090 GN=Ovca2 PE=1 SV=1	24.2	174780		167851	274834		356114	210764
Q9CY16	28S ribosomal protein S28, mitochondrial OS=Mus musculus OX=10090 GN=Mrps28 PE=1 SV=1	20.5	712830	1.15431e+06	546282	42063	37197.7	344597	2.45822e+06	2.91741e+06	1.89273e+06		465618
P51660	Peroxisomal multifunctional enzyme type 2 OS=Mus musculus OX=10090 GN=Hsd17b4 PE=1 SV=3	79.4	2.4539e+06	2.03802e+06	2.40167e+06	1.89012e+07	2.05787e+07	1.62156e+07	7.09539e+06	7.72534e+06	9.29817e+06	9.686e+06	1.25147e+07	9.99809e+06
Q8K2F8	Protein LSM14 homolog A OS=Mus musculus OX=10090 GN=Lsm14a PE=1 SV=1	50.5	216071	2.75666e+06	261436	1.77947e+06	1.76166e+06	1.72096e+06	1.03259e+06	883770	1.36993e+06	507414	422651	913942
Q71LX4	Talin-2 OS=Mus musculus OX=10090 GN=Tln2 PE=1 SV=3	253.5	2.3657e+06		2.30026e+06	205715	213643	1.35718e+06	6.58399e+06	763505	6.14779e+06	946613	241297	659990
Q6P7W5	tRNA-splicing endonuclease subunit Sen2 OS=Mus musculus OX=10090 GN=Tsen2 PE=1 SV=1	52.2							1.42551e+06	2.54925e+06	2.18693e+06	500395	410182	594941
P17751	Triosephosphate isomerase OS=Mus musculus OX=10090 GN=Tpi1 PE=1 SV=4	32.2	6.47786e+07	5.73903e+07	6.88763e+07	9.19903e+08	8.91787e+08	8.80829e+08	1.0521e+08	1.26768e+08	1.06499e+08	2.59166e+08	2.53008e+08	2.7329e+08
Q9Z2A0	3-phosphoinositide-dependent protein kinase 1 OS=Mus musculus OX=10090 GN=Pdpk1 PE=1 SV=2	63.7							108643		78537.5
P10126	Elongation factor 1-alpha 1 OS=Mus musculus OX=10090 GN=Eef1a1 PE=1 SV=3	50.1	7.82554e+08	9.71842e+08	9.59049e+08	1.34483e+09	1.57287e+09	1.30864e+09	1.30886e+09	1.68728e+09	1.48965e+09	3.48271e+08	4.22833e+08	3.77425e+08
Q810D6	Glutamate-rich WD repeat-containing protein 1 OS=Mus musculus OX=10090 GN=Grwd1 PE=1 SV=2	49.2	3.23967e+06	1.76093e+06	1.83377e+06		341720	53618.1	1.73012e+07	1.49375e+07	1.20452e+07			2.16643e+06
P97393	Rho GTPase-activating protein 5 OS=Mus musculus OX=10090 GN=Arhgap5 PE=1 SV=2	172							525282	867494	671526	71791.9	74491.1	711744
P63242	Eukaryotic translation initiation factor 5A-1 OS=Mus musculus OX=10090 GN=Eif5a PE=1 SV=2	16.8	6.48751e+07	7.93444e+07	7.47111e+07	8.36164e+07	1.1556e+08	8.39238e+07	2.06713e+08	2.84244e+08	2.32634e+08	5.50116e+07	7.20089e+07	3.2222e+07
P35278	Ras-related protein Rab-5C OS=Mus musculus OX=10090 GN=Rab5c PE=1 SV=2	23.4	1.76175e+06	1.40189e+06	2.106e+06	8.68535e+06	6.74674e+06	8.6387e+06	6.70702e+06	6.9945e+06	9.81666e+06	7.20745e+06	4.79932e+06	5.72746e+06
Q9R210	Transcription factor EB OS=Mus musculus OX=10090 GN=Tfeb PE=1 SV=2	52.6									251576
Q9WUK2	Eukaryotic translation initiation factor 4H OS=Mus musculus OX=10090 GN=Eif4h PE=1 SV=3	27.3	9.21745e+06	8.48191e+06	1.37731e+07	3.28124e+07	1.67979e+07	2.91004e+07	2.14037e+07	23690370	2.82873e+07	9.98936e+06	8.46657e+06	1.10503e+07
Q80TB8	Synaptic vesicle membrane protein VAT-1 homolog-like OS=Mus musculus OX=10090 GN=Vat1l PE=1 SV=2	45.8	57833.8	390179	24649.9	5.84781e+06	2.10294e+07	23844727	363857	270599	474388	3.83763e+06	1.51477e+07	1.84868e+07
Q91W50	Cold shock domain-containing protein E1 OS=Mus musculus OX=10090 GN=Csde1 PE=1 SV=1	88.7	2.8099e+06	3.39925e+06	3.82983e+06	7.56768e+06	6.6983e+06	6.89306e+06	2.43168e+07	2.82964e+07	2.39109e+07	9.11884e+06	7.29989e+06	1.02826e+07
Q99L00	HAUS augmin-like complex subunit 8 OS=Mus musculus OX=10090 GN=Haus8 PE=1 SV=2	41.6	134361		215205				328999	464162	253063
Q62276	Mediator of RNA polymerase II transcription subunit 22 OS=Mus musculus OX=10090 GN=Med22 PE=1 SV=2	22.3							137631		151942		42360.5
Q9CZ42	ATP-dependent (S)-NAD(P)H-hydrate dehydratase OS=Mus musculus OX=10090 GN=Naxd PE=1 SV=1	36.7	365068	2.12837e+06	459826	8.86609e+06	4.28409e+06	5.7773e+06	827152	1.40073e+06	1.63511e+06	2.69072e+06	1.17081e+06	1.60156e+06
Q80XS6	Protein Smaug homolog 2 OS=Mus musculus OX=10090 GN=Samd4b PE=1 SV=1	75								343216	322748			284774
P18155	Bifunctional methylenetetrahydrofolate dehydrogenase/cyclohydrolase, mitochondrial OS=Mus musculus OX=10090 GN=Mthfd2 PE=1 SV=1	37.8	1.54316e+06	1.23236e+06	940419	137884	280178	924362	1.26555e+07	1.4209e+07	1.37137e+07	639843	311566	1.06861e+06
O70551	SRSF protein kinase 1 OS=Mus musculus OX=10090 GN=Srpk1 PE=1 SV=2	73	2.2282e+06	1.2422e+06	2.14683e+06	298799	1.67595e+06	985464	1.10393e+07	1.13614e+07	1.11913e+07	573176	765921	1.14777e+06
Q8BK30	NADH dehydrogenase [ubiquinone] flavoprotein 3, mitochondrial OS=Mus musculus OX=10090 GN=Ndufv3 PE=1 SV=1	11.8	30455.4	48979.2	122154			117689	341446	321448	503967		226575
Q7TQK1	Integrator complex subunit 7 OS=Mus musculus OX=10090 GN=Ints7 PE=1 SV=1	106.8	117761	110847	174452	205361		138080	880684	1.07622e+06	210546	260880	55115.4
Q6DYE8	Ectonucleotide pyrophosphatase/phosphodiesterase family member 3 OS=Mus musculus OX=10090 GN=Enpp3 PE=1 SV=2	98.6	67995.7						4.10244e+06	6.13742e+06	3.36652e+06	466238	358572	1.17559e+06
P58059	28S ribosomal protein S21, mitochondrial OS=Mus musculus OX=10090 GN=Mrps21 PE=1 SV=1	10.6	115131	131737	107965				499018	839679	543148
Q0P678	Zinc finger CCCH domain-containing protein 18 OS=Mus musculus OX=10090 GN=Zc3h18 PE=1 SV=1	105.6	58396.8	168496					1.41303e+06	1.45024e+06	74522.3			166629
Q9QXZ0	Microtubule-actin cross-linking factor 1 OS=Mus musculus OX=10090 GN=Macf1 PE=1 SV=2	831.4	2.05435e+06	3.25072e+06	1.97389e+06	8.25236e+06	7.86259e+06	6.31757e+06	2.1714e+07	2.08431e+07	2.11204e+07	9.10248e+06	1.60651e+07	8.66342e+06
P55012	Solute carrier family 12 member 2 OS=Mus musculus OX=10090 GN=Slc12a2 PE=1 SV=2	131							71674.2		71389.2
Q9CWE0	Mitochondrial fission regulator 1-like OS=Mus musculus OX=10090 GN=Mtfr1l PE=1 SV=1	31.7							54508.9	60536.3	98614.9			29579.4
P11103	Poly [ADP-ribose] polymerase 1 OS=Mus musculus OX=10090 GN=Parp1 PE=1 SV=3	113	1.1768e+07	1.27554e+07	7.31978e+06	1.07193e+07	1.7997e+07	1.81394e+07	3.15669e+07	4.00563e+07	2.37501e+07	5.35324e+06	8.66811e+06	8.77237e+06
Q8VE99	Coiled-coil domain-containing protein 115 OS=Mus musculus OX=10090 GN=Ccdc115 PE=1 SV=1	19.7							4.18966e+06	4.26155e+06	4.01214e+06	1.09751e+06	770875	1.01623e+06
Q920A5	Retinoid-inducible serine carboxypeptidase OS=Mus musculus OX=10090 GN=Scpep1 PE=1 SV=2	50.9	8.07853e+06	2.42859e+06	4.97947e+06	9.42136e+06	8.9722e+06	7.49676e+06	1.32981e+07	1.44986e+07	1.47011e+07	4.683e+06	3.56382e+06	4.65317e+06
Q9Z0R6	Intersectin-2 OS=Mus musculus OX=10090 GN=Itsn2 PE=1 SV=2	188.8							413944
D3YYU8	Obscurin-like protein 1 OS=Mus musculus OX=10090 GN=Obsl1 PE=1 SV=1	197.8	705686	650904	770912	194635	448527	337787	2.12881e+06	1.91872e+06	1.94113e+06	521184	502634
Q9Z0Z7	Krueppel-like factor 5 OS=Mus musculus OX=10090 GN=Klf5 PE=1 SV=2	49.7	99251	95275.2	92951.4				824289	864085	171176
Q9CX86	Heterogeneous nuclear ribonucleoprotein A0 OS=Mus musculus OX=10090 GN=Hnrnpa0 PE=1 SV=1	30.5	5.34685e+06	5.5799e+06	2.3109e+06	7.86087e+06	7.10544e+06	6.92478e+06	1.66843e+07	2.04164e+07	8.11051e+06	4.47439e+06	3.33825e+06	4.32204e+06
Q91VR8	Protein BRICK1 OS=Mus musculus OX=10090 GN=Brk1 PE=1 SV=1	8.8	193936	258461	414350	3.23087e+06	1.92373e+06	2.59682e+06	1.44929e+06	1.43399e+06	1.54209e+06	2.74291e+06	1.74855e+06	2.15853e+06
Q9CWF2	Tubulin beta-2B chain OS=Mus musculus OX=10090 GN=Tubb2b PE=1 SV=1	49.9	1.90428e+06	2.05558e+06	2.38518e+06	9.96986e+07	4.62252e+07	8.49093e+07	5.57883e+06	5.69372e+06	5.90269e+06	42448596	2.04812e+07	3.75469e+07
Q6R0H7	Guanine nucleotide-binding protein G(s) subunit alpha isoforms XLas OS=Mus musculus OX=10090 GN=Gnas PE=1 SV=1	121.4	390021	305752	317785	5.79415e+06	2.85889e+06	2.73379e+06	1.07646e+06	1.17303e+06	857038	2.47274e+06	1.14011e+06	1.8961e+06
Q80YV3	Transformation/transcription domain-associated protein OS=Mus musculus OX=10090 GN=Trrap PE=1 SV=2	291.4							1.40963e+06	1.66859e+06	1.09208e+06	975892	96723.7	316402
Q8BZ36	RAD50-interacting protein 1 OS=Mus musculus OX=10090 GN=Rint1 PE=1 SV=2	90		344366				254699	547938
B2RXC1	Trafficking protein particle complex subunit 11 OS=Mus musculus OX=10090 GN=Trappc11 PE=1 SV=1	128.3	305445	100610	203562	133653	330769	3.24986e+06	2.33944e+06	2.59827e+06	2.36423e+06	1.48489e+06	867389	1.05507e+06
Q8C1E7	Transmembrane protein 120A OS=Mus musculus OX=10090 GN=Tmem120a PE=1 SV=1	40.7								45083.9	124316
Q921L3	Calcium load-activated calcium channel OS=Mus musculus OX=10090 GN=Tmco1 PE=1 SV=1	21.2	662575	699825	526382	467226	488784	511442	3.262e+06	4.30416e+06	2.31236e+06	546506	294631	397118
Q9JM76	Actin-related protein 2/3 complex subunit 3 OS=Mus musculus OX=10090 GN=Arpc3 PE=1 SV=3	20.5	3.21456e+06	2.24029e+06	4.85805e+06	2.10558e+07	2.28389e+07	1.73212e+07	9.71071e+06	8.25608e+06	1.28698e+07	1.08084e+07	1.03685e+07	8.97822e+06
P62500	TSC22 domain family protein 1 OS=Mus musculus OX=10090 GN=Tsc22d1 PE=1 SV=2	109.7	686484	558200	821702	5.94948e+06	6.70658e+06	3.97147e+06	2.9859e+06	3.25116e+06	3.94252e+06	4.70632e+06	5.32223e+06	3.1429e+06
Q9CZT6	Protein CMSS1 OS=Mus musculus OX=10090 GN=Cmss1 PE=2 SV=1	31.6							300785	227400	152337			740547
Q921S7	39S ribosomal protein L37, mitochondrial OS=Mus musculus OX=10090 GN=Mrpl37 PE=1 SV=1	48.3	351639	252575	428154	688473	534199		1.39022e+06	1.89452e+06	1.25018e+06		538003	276142
O08915	AH receptor-interacting protein OS=Mus musculus OX=10090 GN=Aip PE=1 SV=1	37.6	176000	194890	170220	747004	893529	702761	2.62077e+06	2.46371e+06	2.29058e+06	3.51738e+06	1.52864e+06	898602
Q99LI5	Zinc finger protein 281 OS=Mus musculus OX=10090 GN=Znf281 PE=1 SV=1	96.6	1.02849e+06	1.25715e+06	591434	180784			1.93195e+06	3.85407e+06	1.31254e+06
P16951	Cyclic AMP-dependent transcription factor ATF-2 OS=Mus musculus OX=10090 GN=Atf2 PE=1 SV=2	52.3							72606.2	100343
Q9JLV1	BAG family molecular chaperone regulator 3 OS=Mus musculus OX=10090 GN=Bag3 PE=1 SV=2	61.8	69586	91643.1			170923	252316	105685	193133	78406.1		82079.4	74764.5
Q80X90	Filamin-B OS=Mus musculus OX=10090 GN=Flnb PE=1 SV=3	277.7	3.85912e+07	3.55746e+07	3.92946e+07	2.91104e+07	4.11319e+07	3.94829e+07	1.29137e+08	1.32021e+08	1.21796e+08	1.69215e+07	1.99159e+07	2.16355e+07
O70503	Very-long-chain 3-oxoacyl-CoA reductase OS=Mus musculus OX=10090 GN=Hsd17b12 PE=1 SV=1	34.7	4.8866e+06	3.35705e+06	5.42159e+06	1.844e+07	1.75625e+07	1.76901e+07	9.76869e+06	1.03605e+07	1.01211e+07	7.33775e+06	5.0813e+06	7.06289e+06
Q9CPV4	Glyoxalase domain-containing protein 4 OS=Mus musculus OX=10090 GN=Glod4 PE=1 SV=1	33.3	6.77658e+06	6.06682e+06	6.16313e+06	5.5306e+07	5.11644e+07	5.09085e+07	1.73498e+07	1.67971e+07	1.37549e+07	2.40532e+07	1.93053e+07	1.95848e+07
Q9CR67	Transmembrane protein 33 OS=Mus musculus OX=10090 GN=Tmem33 PE=1 SV=1	28	693809	282483	2.60864e+06	3.5705e+06	5.34975e+06	2.70731e+06	4.43319e+06	3.99919e+06	5.79499e+06	2.84032e+06	4.12694e+06	3.53721e+06
P63028	Translationally-controlled tumor protein OS=Mus musculus OX=10090 GN=Tpt1 PE=1 SV=1	19.5	5.37658e+07	5.66991e+07	7.07444e+07	7.36624e+07	8.16212e+07	9.69398e+07	1.37106e+08	1.61783e+08	1.83125e+08	4.03242e+07	2.77262e+07	3.91725e+07
Q8R180	ERO1-like protein alpha OS=Mus musculus OX=10090 GN=Ero1a PE=1 SV=2	54.1	3.75879e+06	2.28798e+06	2.21447e+06	2.07293e+07	2.58025e+07	2.70934e+07	2.539e+06	2.19212e+06	2.99223e+06	3.2716e+06	2.83966e+06	5.42343e+06
O88271	Craniofacial development protein 1 OS=Mus musculus OX=10090 GN=Cfdp1 PE=1 SV=1	32.9	1.04494e+06	985446	1.05044e+06	1.25462e+06	2.7228e+06	1.99041e+06	6.44749e+06	6.75709e+06	7.41444e+06	1.58278e+06	2.30221e+06	2.21505e+06
Q8BX09	Retinoblastoma-binding protein 5 OS=Mus musculus OX=10090 GN=Rbbp5 PE=1 SV=2	59.1	297525	317481	123654	243899	100039	428814	1.92688e+06	2.34434e+06	1.42557e+06	441614	159182	326180
P05214	Tubulin alpha-3 chain OS=Mus musculus OX=10090 GN=Tuba3a PE=1 SV=1	49.9	4.19983e+06	7.56358e+06	5.92393e+06	8.20972e+08	7.32053e+08	6.26675e+08	1.04309e+07	2.1732e+07	1.70916e+07	3.25765e+08	3.15662e+08	2.98677e+08
Q8VDM4	26S proteasome non-ATPase regulatory subunit 2 OS=Mus musculus OX=10090 GN=Psmd2 PE=1 SV=1	100.1	5.58594e+07	5.69598e+07	6.64918e+07	1.35924e+08	1.38353e+08	1.07682e+08	1.25864e+08	1.27555e+08	1.23917e+08	4.53247e+07	4.47111e+07	3.70486e+07
Q3TDQ1	Dolichyl-diphosphooligosaccharide--protein glycosyltransferase subunit STT3B OS=Mus musculus OX=10090 GN=Stt3b PE=1 SV=2	93.2	323357	339432	401820	1.85368e+06	1.27043e+06	1.62097e+06	1.24886e+06	1.47494e+06	1.54801e+06	879711	1.04228e+06	1.05901e+06
Q9D7P6	Iron-sulfur cluster assembly enzyme ISCU, mitochondrial OS=Mus musculus OX=10090 GN=Iscu PE=1 SV=1	18.1							769062	834476	666539	215199	124660	227827
Q99KI0	Aconitate hydratase, mitochondrial OS=Mus musculus OX=10090 GN=Aco2 PE=1 SV=1	85.4	2.80759e+07	4.94443e+07	4.3898e+07	1.65808e+08	1.33524e+08	1.48205e+08	6.51223e+07	6.6897e+07	7.01238e+07	4.6381e+07	3.8144e+07	3.6534e+07
Q7TNE3	Sperm-associated antigen 7 OS=Mus musculus OX=10090 GN=Spag7 PE=1 SV=1	25.9	533489	298677	495088	1.19372e+06	1.38288e+06	1.39094e+06	4.69571e+06	3.9974e+06	5.54132e+06	2.0525e+06	2.27416e+06	2.54667e+06
Q6ZPZ3	Zinc finger CCCH domain-containing protein 4 OS=Mus musculus OX=10090 GN=Zc3h4 PE=1 SV=2	140.9							281857	355439	466329	214619		213455
P54726	UV excision repair protein RAD23 homolog A OS=Mus musculus OX=10090 GN=Rad23a PE=1 SV=2	39.7							353396	99307.2	230050	44915.8	42120.2	59407.5
Q9D1P4	Cysteine and histidine-rich domain-containing protein 1 OS=Mus musculus OX=10090 GN=Chordc1 PE=1 SV=1	37.3	7.86002e+06	7.13108e+06	1.2453e+07	1.43116e+07	1.37276e+07	1.46757e+07	2.59832e+07	2.80753e+07	2.54067e+07	4.25393e+06	1.21197e+07	5.7921e+06
Q8C7X2	ER membrane protein complex subunit 1 OS=Mus musculus OX=10090 GN=Emc1 PE=1 SV=1	111.5	242546	685041	500781	896844	1.82141e+06	616581	2.40353e+06	2.64078e+06	1.28726e+06	1.07796e+06	250054	1.42622e+06
Q2YDW2	Protein misato homolog 1 OS=Mus musculus OX=10090 GN=Msto1 PE=1 SV=1	61.2	1.13885e+06	1.05963e+06	1.0153e+06	395347	189596	1.00639e+06	1.13284e+07	1.1159e+07	1.30014e+07	1.08329e+06	776369	464792
Q8CIN4	Serine/threonine-protein kinase PAK 2 OS=Mus musculus OX=10090 GN=Pak2 PE=1 SV=1	57.9	3.06517e+06	2.8376e+06	3.74237e+06	2.82455e+07	2.83706e+07	2.31759e+07	1.07436e+07	1.22582e+07	1.26389e+07	1.71526e+07	1.34364e+07	1.58951e+07
P30275	Creatine kinase U-type, mitochondrial OS=Mus musculus OX=10090 GN=Ckmt1 PE=1 SV=1	47	984480	751544	888394	3.92261e+06	1.77971e+06	1.27754e+06	3.08788e+06	3.24206e+06	2.56222e+06	3.07892e+06	540281	804610
Q9QZQ1	Afadin OS=Mus musculus OX=10090 GN=Afdn PE=1 SV=3	206.4	3.72005e+06	3.26746e+06	5.67077e+06	9.65973e+06	7.50132e+06	8.02288e+06	1.5207e+07	1.82683e+07	1.00221e+07	4.59608e+06	4.00317e+06	4.89491e+06
P61082	NEDD8-conjugating enzyme Ubc12 OS=Mus musculus OX=10090 GN=Ube2m PE=1 SV=1	20.9	3.01622e+06	2.98684e+06	3.7444e+06	1.62859e+07	1.83755e+07	1.37093e+07	1.03243e+07	1.14394e+07	1.01907e+07	8.48301e+06	9.81555e+06	6.73748e+06
Q921H8	3-ketoacyl-CoA thiolase A, peroxisomal OS=Mus musculus OX=10090 GN=Acaa1a PE=1 SV=1	43.9	3.29815e+06	3.39008e+06	5.75758e+06	1.24214e+07	1.18956e+07	9.46508e+06	1.23568e+07	1.54874e+07	1.74951e+07	6.92443e+06	6.4849e+06	6.19837e+06
Q6ZQ73	Cullin-associated NEDD8-dissociated protein 2 OS=Mus musculus OX=10090 GN=Cand2 PE=1 SV=2	135.5	749444	731155	714734	3.17388e+06	5.23543e+06	5.79304e+06	4.24652e+06	3.27604e+06	9.17657e+06	3.33351e+06	6.10368e+06	5.88955e+06
Q6ZWY8	Thymosin beta-10 OS=Mus musculus OX=10090 GN=Tmsb10 PE=1 SV=3	5	11699213	12911456	12123043	1.61257e+08	7.91582e+07	6.23699e+07	44728500	43992612	40584496	8.78675e+07	4.35526e+07	3.46312e+07
P60843	Eukaryotic initiation factor 4A-I OS=Mus musculus OX=10090 GN=Eif4a1 PE=1 SV=1	46.1	7.54519e+07	7.06836e+07	8.52557e+07	1.16364e+08	1.26959e+08	1.15863e+08	3.59751e+08	4.10318e+08	3.46916e+08	8.58357e+07	8.96814e+07	9.52989e+07
O08810	116 kDa U5 small nuclear ribonucleoprotein component OS=Mus musculus OX=10090 GN=Eftud2 PE=1 SV=1	109.3	7.8615e+06	3.53296e+06	3.02639e+06	5.17924e+06	6.86551e+06	7.34574e+06	2.83006e+07	2.88713e+07	1.41214e+07	5.70918e+06	6.01712e+06	3.9563e+06
Q9QUH0	Glutaredoxin-1 OS=Mus musculus OX=10090 GN=Glrx PE=1 SV=3	11.9	497383	449170	793903	2.74305e+06	4.02226e+06	3.45381e+06	2.18505e+06	1.43273e+06	1.84969e+06	1.28393e+06	2.0787e+06	1.76626e+06
Q05D44	Eukaryotic translation initiation factor 5B OS=Mus musculus OX=10090 GN=Eif5b PE=1 SV=2	137.5	4.56214e+06	4.24288e+06	4.12177e+06	6.13325e+06	4.48398e+06	4.01507e+06	2.52785e+07	3.12744e+07	2.3059e+07	4.192e+06	4.82756e+06	4.72331e+06
Q99KH8	Serine/threonine-protein kinase 24 OS=Mus musculus OX=10090 GN=Stk24 PE=1 SV=1	47.9	3.22215e+06	2.47164e+06	4.5065e+06	5.64599e+06	5.77488e+06	5.36595e+06	1.39774e+07	1.4636e+07	1.59858e+07	7.32861e+06	2.17775e+06	3.76568e+06
Q99J95	Cyclin-dependent kinase 9 OS=Mus musculus OX=10090 GN=Cdk9 PE=1 SV=1	42.7	175616	159128	608889	483067	270670	419746	4.02563e+06	4.96457e+06	4.06245e+06	1.32574e+06	598620	1.24205e+06
Q3UMW7	MAP kinase-activated protein kinase 3 OS=Mus musculus OX=10090 GN=Mapkapk3 PE=1 SV=2	43.3	115348		165696	266229	179873	262743
P62835	Ras-related protein Rap-1A OS=Mus musculus OX=10090 GN=Rap1a PE=1 SV=1	21	156823	108661	127133	85167.2	231039	570504	340379	330755			239527
Q02257	Junction plakoglobin OS=Mus musculus OX=10090 GN=Jup PE=1 SV=3	81.7	695068	240353	752691	396604	440187	276662	1.71674e+07	1.23148e+07	7.75415e+06	1.79603e+06	1.64168e+06	796926
Q3TKT4	Transcription activator BRG1 OS=Mus musculus OX=10090 GN=Smarca4 PE=1 SV=1	181.3	3.00573e+06	3.49261e+06	1.58e+06	7.63464e+06	3.53382e+06	4.30228e+06	1.74796e+07	1.66096e+07	4.86582e+06	6.49973e+06	1.59833e+06	3.55084e+06
Q8BIQ5	Cleavage stimulation factor subunit 2 OS=Mus musculus OX=10090 GN=Cstf2 PE=1 SV=2	61.3	4.33068e+06	3.92682e+06	4.42726e+06	5.78271e+06	5.16165e+06	6.93982e+06	7.88381e+06	1.06221e+07	4.32502e+06	1.625e+06	953434	2.39022e+06
P49962	Signal recognition particle 9 kDa protein OS=Mus musculus OX=10090 GN=Srp9 PE=1 SV=2	10.2	792060	437547	976487	1.1577e+06	1950163	1.76323e+06	3.21479e+06	2.98853e+06	3.86071e+06	1.19395e+06	1.10871e+06	1.22339e+06
P43247	DNA mismatch repair protein Msh2 OS=Mus musculus OX=10090 GN=Msh2 PE=1 SV=1	104.1	4.1716e+07	4.01624e+07	4.7255e+07	5.64042e+06	1.40643e+07	1.07825e+07	1.21332e+08	1.37952e+08	1.24902e+08	2.67719e+06	5.33373e+06	5.86854e+06
Q8CI75	DIS3-like exonuclease 2 OS=Mus musculus OX=10090 GN=Dis3l2 PE=1 SV=1	97.7	337862	173307	77517.3	2.21662e+06	1.99516e+06	1.99402e+06	162805	777302	455919	941057	700197	630796
Q9DBG3	AP-2 complex subunit beta OS=Mus musculus OX=10090 GN=Ap2b1 PE=1 SV=1	104.5	1.09766e+07	1.14512e+07	1.69166e+07	1.16374e+08	7.60651e+07	7.37088e+07	3.66836e+07	3.57672e+07	4.47569e+07	5.30627e+07	3.43858e+07	3.66058e+07
Q8K2Z4	Condensin complex subunit 1 OS=Mus musculus OX=10090 GN=Ncapd2 PE=1 SV=2	155.6	9.89859e+06	7.95337e+06	1.05139e+07	5.02515e+06	9.50973e+06	6.88154e+06	4.33066e+07	4.51787e+07	5.05196e+07	4.41112e+06	5.42173e+06	6.03594e+06
Q8BKV1	Glypican-2 OS=Mus musculus OX=10090 GN=Gpc2 PE=2 SV=1	63.3				74673.2	75795.7	83322.9						79148.8
P70398	Probable ubiquitin carboxyl-terminal hydrolase FAF-X OS=Mus musculus OX=10090 GN=Usp9x PE=1 SV=2	290.5	9.34423e+06	1.03271e+07	8.78626e+06	3.3646e+07	3.54789e+07	2.15975e+07	4.84109e+07	5.4391e+07	6.35126e+07	2.99958e+07	2.50071e+07	2.4775e+07
O54774	AP-3 complex subunit delta-1 OS=Mus musculus OX=10090 GN=Ap3d1 PE=1 SV=1	135	453071	1.05418e+07	738153	8.39219e+06	4.49484e+06	4.61029e+06	4.77305e+06	7.19723e+06	6.86211e+06	6.17054e+06	2.65465e+06	2.59335e+06
P34884	Macrophage migration inhibitory factor OS=Mus musculus OX=10090 GN=Mif PE=1 SV=2	12.5	4.65282e+07	5.77929e+07	6.76895e+07	3.44142e+08	432375793	3.50178e+08	1.19744e+08	1.5491e+08	1.65881e+08	1.23541e+08	1.62312e+08	1.60079e+08
Q8BMI3	ADP-ribosylation factor-binding protein GGA3 OS=Mus musculus OX=10090 GN=Gga3 PE=1 SV=2	77.9			481328	217853			145966	111134	193082	73557
P37913	DNA ligase 1 OS=Mus musculus OX=10090 GN=Lig1 PE=1 SV=2	102.2	1.38579e+07	1.48194e+07	1.76444e+07	4.64117e+06	5.87319e+06	8.05746e+06	6.04793e+07	6.82404e+07	7.19041e+07	3.20806e+06	4.75168e+06	4.29506e+06
Q62074	Protein kinase C iota type OS=Mus musculus OX=10090 GN=Prkci PE=1 SV=3	68.2	639104	286146	690283	1.14248e+06	1.22342e+06	884866	5.82945e+06	7.23753e+06	6.15851e+06	5.41855e+06	1.82232e+06	937517
Q80ZK0	28S ribosomal protein S10, mitochondrial OS=Mus musculus OX=10090 GN=Mrps10 PE=1 SV=1	18.7	173380	158985	276362				1.37255e+06	1.0747e+06	1.13615e+06		20722.3
Q3UI43	BRISC and BRCA1-A complex member 1 OS=Mus musculus OX=10090 GN=Babam1 PE=1 SV=1	36.8							484048	719029	509034	45790	147988	328210
Q62193	Replication protein A 32 kDa subunit OS=Mus musculus OX=10090 GN=Rpa2 PE=1 SV=1	29.7	2.91235e+07	3.37124e+06	3.005e+07	5.67095e+06	6.24658e+06	4.52482e+06	2.07428e+07	1.65629e+07	2.17907e+07	990624	1.14432e+06	1.30029e+06
Q62261	Spectrin beta chain, non-erythrocytic 1 OS=Mus musculus OX=10090 GN=Sptbn1 PE=1 SV=2	274.1	6.73878e+06	6.9925e+06	2.48059e+06	6.60615e+07	5.42923e+07	5.92169e+07	3.2786e+07	3.75433e+07	1.05199e+07	6.22219e+07	3.91341e+07	3.50055e+07
P97355	Spermine synthase OS=Mus musculus OX=10090 GN=Sms PE=1 SV=1	41.3	1.46641e+06	509730	1.75473e+06	9.51073e+06	7.40994e+06	6.89289e+06	2.71094e+06	2.39247e+06	3.25751e+06	4.85194e+06	2.12468e+06	2.7239e+06
Q9CZU3	Exosome RNA helicase MTR4 OS=Mus musculus OX=10090 GN=Mtrex PE=1 SV=1	117.6	3.29567e+06	3.12266e+06	3.2771e+06	2.48711e+06	2.70754e+06	4.19269e+06	1.67838e+07	1.76718e+07	1.18754e+07	2.89539e+06	1.8364e+06	1.9898e+06
Q8K157	Aldose 1-epimerase OS=Mus musculus OX=10090 GN=Galm PE=1 SV=1	37.8	279264	262469	316451	208230		205780	461269	397930	934460			89337
Q9R0P9	Ubiquitin carboxyl-terminal hydrolase isozyme L1 OS=Mus musculus OX=10090 GN=Uchl1 PE=1 SV=1	24.8	9.44106e+06	7.10228e+06	9.25922e+06	4.99428e+08	2.35908e+08	1.90852e+08	2.2941e+07	2.64252e+07	2.57058e+07	2.39003e+08	1.06197e+08	7.94703e+07
Q8CBW3	Abl interactor 1 OS=Mus musculus OX=10090 GN=Abi1 PE=1 SV=3	52.3	117032	209716	717916	2.44927e+06	2.57715e+06	1.7941e+06	860938	1.04033e+06	964794	1.62908e+06	1.12895e+06	1.07597e+06
Q14B71	Cell division cycle-associated protein 2 OS=Mus musculus OX=10090 GN=Cdca2 PE=1 SV=2	106.3							112094	112222	11336.9
Q8VDW0	ATP-dependent RNA helicase DDX39A OS=Mus musculus OX=10090 GN=Ddx39a PE=1 SV=1	49	8.98785e+06	6.93278e+06	6.5956e+06	4.14726e+06	2.73966e+06	3.86182e+06	2.57016e+07	2.78004e+07	18678571	1.17267e+06	2.24331e+06	1.91886e+06
P70399	TP53-binding protein 1 OS=Mus musculus OX=10090 GN=Tp53bp1 PE=1 SV=3	212.6	68990.6	274202	1.01836e+06	1.06324e+07	6.0003e+06	7.92521e+06	1.10562e+06	873266	144487	4.38809e+06	1.48934e+06	1.98021e+06
Q9DBR7	Protein phosphatase 1 regulatory subunit 12A OS=Mus musculus OX=10090 GN=Ppp1r12a PE=1 SV=2	114.9	794070	859136	360873	1.11196e+06	940760	1.21284e+06	5.34539e+06	5.36122e+06	1.9865e+06	587151	1.52638e+06	1.15661e+06
Q9R1C0	Transcription initiation factor TFIID subunit 7 OS=Mus musculus OX=10090 GN=Taf7 PE=1 SV=1	39.1	497741	385676	287360	165312		224687	3.26603e+06	4.40293e+06	4.00782e+06	58261.6	263858	130376
Q61595	Kinectin OS=Mus musculus OX=10090 GN=Ktn1 PE=1 SV=1	152.5	3.40094e+06	3.87281e+06	2.02565e+06	9.03651e+06	5.28347e+06	5.48941e+06	1.42881e+07	1.68317e+07	1.35595e+07	6.61008e+06	2.95271e+06	5.74831e+06
Q9D6F9	Tubulin beta-4A chain OS=Mus musculus OX=10090 GN=Tubb4a PE=1 SV=3	49.6	1.67601e+07	2.2078e+07	1.68139e+07	3.14526e+08	120889938	2.60116e+08	4.5218e+07	6.85255e+07	4.07412e+07	1.32986e+08	5.03369e+07	1.04394e+08
P12787	Cytochrome c oxidase subunit 5A, mitochondrial OS=Mus musculus OX=10090 GN=Cox5a PE=1 SV=2	16.1	3.37255e+06	5.02571e+06	4.13101e+06	3.9183e+06	2.11382e+06	2.96829e+06	1.62e+07	1.89893e+07	1.50988e+07	2.17165e+06	2.37613e+06	1.09995e+06
P56873	Sjoegren syndrome/scleroderma autoantigen 1 homolog OS=Mus musculus OX=10090 GN=Sssca1 PE=1 SV=1	21.3	246722	181144	350595	72657.8	391197	366446	4.21203e+06	5.5078e+06	5.51526e+06	759425	598697	648153
Q91WS0	CDGSH iron-sulfur domain-containing protein 1 OS=Mus musculus OX=10090 GN=Cisd1 PE=1 SV=1	12.1	1.16374e+06	814831	924258	3.87186e+06	2.33826e+06	1.69311e+06	3.7339e+06	3.57604e+06	2.79764e+06	645174	2.61772e+06	1.34006e+06
Q8BGZ4	Cell division cycle protein 23 homolog OS=Mus musculus OX=10090 GN=Cdc23 PE=1 SV=2	68.5	718646	1.34808e+06	2.62384e+06	1.30926e+07	6.38601e+06	5.86825e+06	3.11761e+06	3.67597e+06	3.71188e+06	3.28843e+06	2.68405e+06	3.21027e+06
Q3UH60	Disco-interacting protein 2 homolog B OS=Mus musculus OX=10090 GN=Dip2b PE=1 SV=1	171							400975	869816	1.19186e+06	1.26875e+06		324120
Q9CZ13	Cytochrome b-c1 complex subunit 1, mitochondrial OS=Mus musculus OX=10090 GN=Uqcrc1 PE=1 SV=2	52.8	1.28557e+07	7.80795e+06	1.03737e+07	7.46041e+06	5.38716e+06	5.22431e+06	2.79426e+07	2.50791e+07	2.38296e+07	2.40499e+06	1.72034e+06	2.7994e+06
Q9Z1F9	SUMO-activating enzyme subunit 2 OS=Mus musculus OX=10090 GN=Uba2 PE=1 SV=1	70.5	4.60895e+07	5.1645e+07	3.40109e+07	7.56384e+07	6.51347e+07	5.71962e+07	6.47934e+07	1.14626e+08	1.06893e+08	2.40489e+07	2.09465e+07	1.88531e+07
Q8CD15	Ribosomal oxygenase 2 OS=Mus musculus OX=10090 GN=Riox2 PE=1 SV=2	53.5	85664.2	100841	187787	96615	522959	272515	1.58139e+06	2.39375e+06	1.66845e+06	1565073	434779	268866
Q923W1	Trimethylguanosine synthase OS=Mus musculus OX=10090 GN=Tgs1 PE=1 SV=2	96.7	159752	33718.1	188363	286899			400810	622809	818883			257529
Q7TN89	GTPase ERas OS=Mus musculus OX=10090 GN=Eras PE=1 SV=1	24.3	1.24823e+06	288543	1.00694e+06	300806	1.75068e+06	182354	5.12449e+06	8.90979e+06	4.95796e+06	1.92306e+06	278936	379715
O35345	Importin subunit alpha-7 OS=Mus musculus OX=10090 GN=Kpna6 PE=1 SV=2	59.9	2.01759e+06	1.91178e+06	2.29812e+06	3.20312e+06	3.82271e+06	2.5299e+06	1.38577e+07	1.14926e+07	1.23681e+07	2.57459e+06	3.7487e+06	2.42315e+06
Q9CR09	Ubiquitin-fold modifier-conjugating enzyme 1 OS=Mus musculus OX=10090 GN=Ufc1 PE=1 SV=1	19.5	1.6927e+06	1.55036e+06	2.02453e+06	7.45007e+06	7.7301e+06	6.09439e+06	1.95359e+06	5.80456e+06	6.05619e+06	2.3089e+06	3.25904e+06	2.03594e+06
Q8K1A6	Coiled-coil and C2 domain-containing protein 1A OS=Mus musculus OX=10090 GN=Cc2d1a PE=1 SV=2	103.6								121939	61526.8
Q9QYR9	Acyl-coenzyme A thioesterase 2, mitochondrial OS=Mus musculus OX=10090 GN=Acot2 PE=1 SV=2	49.6	1.212e+06	2.86055e+06	977765	2.86934e+07	2.59943e+07	1.8594e+07	2.78559e+06	1.69461e+06	3.0075e+06	6.2661e+06	5.70468e+06	5.46315e+06
Q9JMG1	Endothelial differentiation-related factor 1 OS=Mus musculus OX=10090 GN=Edf1 PE=1 SV=1	16.4	753340	739729	840085	835306	1.90946e+06	1.72153e+06	3.01012e+06	3.79958e+06	3.37149e+06	836536	886864	1.01571e+06
P62137	Serine/threonine-protein phosphatase PP1-alpha catalytic subunit OS=Mus musculus OX=10090 GN=Ppp1ca PE=1 SV=1	37.5	1.6861e+07	1.44783e+07	1.09568e+07	5.4415e+07	4.68786e+07	4.40922e+07	6.85624e+07	7.62369e+07	5.37796e+07	4.14328e+07	2.7179e+07	3.49545e+07
Q9Z1L5	Voltage-dependent calcium channel subunit alpha-2/delta-3 OS=Mus musculus OX=10090 GN=Cacna2d3 PE=1 SV=1	122.7	329170	146518		339001	143652		803959	1.24098e+06	202658	310282	288058
Q9CQ80	Vacuolar protein-sorting-associated protein 25 OS=Mus musculus OX=10090 GN=Vps25 PE=1 SV=1	20.7	3.3518e+06	3.28989e+06	3.09349e+06	4.29783e+06	4.79545e+06	3.63396e+06	3563870	4.40066e+06	2.70988e+06	651771	412065	1.15429e+06
Q9DBA9	General transcription factor IIH subunit 1 OS=Mus musculus OX=10090 GN=Gtf2h1 PE=1 SV=2	61.8							791463	2.7621e+06	473465		1.26407e+06	744329
Q04736	Tyrosine-protein kinase Yes OS=Mus musculus OX=10090 GN=Yes1 PE=1 SV=3	60.6							1.5172e+06	93467.9	548216	431469		152534
Q9JME5	AP-3 complex subunit beta-2 OS=Mus musculus OX=10090 GN=Ap3b2 PE=1 SV=2	119.1	680637	587543	507679	3.87203e+06	1.26957e+06	1.40438e+06	2.00673e+06	1.81652e+06	2.01832e+06	3.22437e+06	289502	888857
Q8C166	Copine-1 OS=Mus musculus OX=10090 GN=Cpne1 PE=1 SV=1	58.8	2.27333e+06	1.70459e+06	2.53341e+06	3.32357e+06	7.14139e+06	3.07513e+06	8.28314e+06	6.13089e+06	6.19873e+06	2.10489e+06	2.76531e+06	1.33079e+06
Q2TPA8	Hydroxysteroid dehydrogenase-like protein 2 OS=Mus musculus OX=10090 GN=Hsdl2 PE=1 SV=1	54.2					69773.6	173642	45364.7	37330.9	85870.8		38850.8	165528
P28574	Protein max OS=Mus musculus OX=10090 GN=Max PE=1 SV=2	18.2							487741	406975	91019.3	122053	34708.6	46528.9
Q0VGY8	Protein TANC1 OS=Mus musculus OX=10090 GN=Tanc1 PE=1 SV=2	200.7									442118
Q9JLV5	Cullin-3 OS=Mus musculus OX=10090 GN=Cul3 PE=1 SV=1	88.9	694922	1.24221e+06	1.2377e+06	1.1827e+07	1.2149e+07	6.77238e+06	6.78213e+06	3.38197e+06	5.79733e+06	8.04305e+06	7.60646e+06	6.47136e+06
Q9DBG6	Dolichyl-diphosphooligosaccharide--protein glycosyltransferase subunit 2 OS=Mus musculus OX=10090 GN=Rpn2 PE=1 SV=1	69	1.83696e+07	1.73553e+07	1.36698e+07	3.45818e+07	31595629	2.44091e+07	4.48999e+07	4.87535e+07	3.28148e+07	1.45919e+07	1.12187e+07	8.7575e+06
Q99KP6	Pre-mRNA-processing factor 19 OS=Mus musculus OX=10090 GN=Prpf19 PE=1 SV=1	55.2	1.13728e+07	1.15198e+07	4.18758e+06	1.21659e+07	1.05973e+07	1.02964e+07	2.63202e+07	3.00932e+07	14792201	6.10773e+06	4.14325e+06	3.65224e+06
Q8BSY0	Aspartyl/asparaginyl beta-hydroxylase OS=Mus musculus OX=10090 GN=Asph PE=1 SV=1	83	904097	1.21315e+06	1.18103e+06	8.14569e+06	8.28275e+06	8.82142e+06	1.82919e+06	1.67591e+06	1.23894e+06	1.98181e+06	1.29135e+06	2.21987e+06
Q8CHP5	Partner of Y14 and mago OS=Mus musculus OX=10090 GN=Pym1 PE=1 SV=2	22.7	817691	906851	749467	565919	1.06273e+06	775051	2.73122e+06	2.7243e+06	2.83443e+06	400249	326839	439794
Q9CQE1	Protein NipSnap homolog 3B OS=Mus musculus OX=10090 GN=Nipsnap3b PE=1 SV=1	28.3	825884	952552	782537	2.26254e+06	801218	1.96391e+06	267516		405223			249372
Q9WUA3	ATP-dependent 6-phosphofructokinase, platelet type OS=Mus musculus OX=10090 GN=Pfkp PE=1 SV=1	85.4	8.75744e+06	1.06715e+07	1.00461e+07	2.32932e+06	3.0152e+06	6.16674e+06	1.93239e+07	2.21447e+07	1.67989e+07	805641	1.84467e+06	722910
Q8CHW4	Translation initiation factor eIF-2B subunit epsilon OS=Mus musculus OX=10090 GN=Eif2b5 PE=1 SV=1	80	2.63845e+06	1.64104e+06	7.84082e+06	3.69131e+06	3.07354e+06	4.31032e+06	9.00787e+06	9.00717e+06	8.1787e+06	1.46504e+06	1.65202e+06	1.27874e+06
P52482	Ubiquitin-conjugating enzyme E2 E1 OS=Mus musculus OX=10090 GN=Ube2e1 PE=1 SV=1	21.3							108301	182600	220311			275188
O70194	Eukaryotic translation initiation factor 3 subunit D OS=Mus musculus OX=10090 GN=Eif3d PE=1 SV=2	63.9	1.50355e+07	1.16885e+07	1.27748e+07	1.70053e+07	1.89969e+07	1.7795e+07	3.85006e+07	4.36582e+07	4.20012e+07	7.80165e+06	6.37635e+06	1.17312e+07
Q8BJY1	26S proteasome non-ATPase regulatory subunit 5 OS=Mus musculus OX=10090 GN=Psmd5 PE=1 SV=4	55.9	9.41202e+06	1.11684e+07	9.44678e+06	2.009e+07	2.10873e+07	2.05308e+07	2.03495e+07	2.46252e+07	1.93071e+07	7.2485e+06	6.51046e+06	5.78139e+06
Q8BFR6	AN1-type zinc finger protein 1 OS=Mus musculus OX=10090 GN=Zfand1 PE=1 SV=1	30.2		69605.3	157712	410799	145039	168610		465726		60837	81264
P40336	Vacuolar protein sorting-associated protein 26A OS=Mus musculus OX=10090 GN=Vps26a PE=1 SV=1	38.1	922402	601975	691012	1.50284e+06	1.87249e+06	1.20621e+06	4.52847e+06	5.35978e+06	4.25415e+06	1.74001e+06	1.2745e+06	1.32279e+06
P04627	Serine/threonine-protein kinase A-Raf OS=Mus musculus OX=10090 GN=Araf PE=1 SV=2	67.5				168079	209932	161803	169146	178097	239998	1.01801e+06	551420	265069
Q9Z0H8	CAP-Gly domain-containing linker protein 2 OS=Mus musculus OX=10090 GN=Clip2 PE=1 SV=2	115.8	1.25001e+06	184451	265658	4.7611e+06	4.52485e+06	3.23618e+06	939865	1.03599e+06	1.23979e+06	2.36996e+06	985622	1.88463e+06
P11499	Heat shock protein HSP 90-beta OS=Mus musculus OX=10090 GN=Hsp90ab1 PE=1 SV=3	83.2	3.32576e+08	2.95214e+08	3.58312e+08	5.93964e+08	6.89064e+08	6.43802e+08	9.95259e+08	9.93581e+08	1.10623e+09	2.93421e+08	3.11652e+08	2.86858e+08
Q04447	Creatine kinase B-type OS=Mus musculus OX=10090 GN=Ckb PE=1 SV=1	42.7	3.87078e+07	3.49833e+07	3.90704e+07	1.39095e+09	7.89559e+08	7.31996e+08	9.00614e+07	8.53712e+07	9.55066e+07	4.43189e+08	2.82604e+08	2.85193e+08
Q9CSU0	Regulation of nuclear pre-mRNA domain-containing protein 1B OS=Mus musculus OX=10090 GN=Rprd1b PE=1 SV=2	36.9	328190	216560	505177	3.56894e+06	2.5349e+06	4.43925e+06	461262	990208	762038	1.73042e+06	772836	926301
Q8VDR9	Dedicator of cytokinesis protein 6 OS=Mus musculus OX=10090 GN=Dock6 PE=1 SV=4	233.1	1.64412e+06	1.34088e+06	556146	1.24198e+06	1.61523e+06	1.58528e+06	1.10071e+07	8.49711e+06	3.89863e+06	1.51868e+06	1.9756e+06	1.00117e+06
Q8K2C9	Very-long-chain (3R)-3-hydroxyacyl-CoA dehydratase 3 OS=Mus musculus OX=10090 GN=Hacd3 PE=1 SV=2	43.1	25060	252104	643641	4.73804e+06	2.42833e+06	2.81048e+06	568244	810521	414341	2.31325e+06	1.10017e+06	1.89091e+06
Q9D710	Thioredoxin-related transmembrane protein 2 OS=Mus musculus OX=10090 GN=Tmx2 PE=1 SV=1	33.9	203409	74771.7	227440	785739	529507	658123	1.21052e+06	1.26807e+06	1.48657e+06	1.19849e+06	603001	790246
Q9JLT4	Thioredoxin reductase 2, mitochondrial OS=Mus musculus OX=10090 GN=Txnrd2 PE=1 SV=4	56.6						305153
Q8VC30	Triokinase/FMN cyclase OS=Mus musculus OX=10090 GN=Tkfc PE=1 SV=1	59.7	285330	305168	1.0966e+06	867558	2.35434e+06	2.36021e+06	1.74738e+06	1.85391e+06	1.98733e+06	1.06405e+06	1.35503e+06	710086
Q61206	Platelet-activating factor acetylhydrolase IB subunit beta OS=Mus musculus OX=10090 GN=Pafah1b2 PE=1 SV=2	25.6	1.30595e+06	4.08302e+06	1.8005e+06	1.02418e+08	4.97517e+07	6.59794e+07	4.54176e+06	6.77423e+06	5.07314e+06	3.64128e+07	1.92059e+07	2.45955e+07
P61222	ATP-binding cassette sub-family E member 1 OS=Mus musculus OX=10090 GN=Abce1 PE=1 SV=1	67.3	1.57136e+07	1.15539e+07	1.86377e+07	1.37535e+07	2.30501e+07	1.80746e+07	5.60318e+07	6.60555e+07	5.85972e+07	9.9932e+06	9.6394e+06	1.19918e+07
Q60972	Histone-binding protein RBBP4 OS=Mus musculus OX=10090 GN=Rbbp4 PE=1 SV=5	47.6	1.9277e+07	1.88418e+07	1.00703e+07	2.54789e+07	1.96565e+07	2.10865e+07	7.04593e+07	8.29179e+07	4.03244e+07	1.42165e+07	1.02272e+07	1.47144e+07
P12815	Programmed cell death protein 6 OS=Mus musculus OX=10090 GN=Pdcd6 PE=1 SV=2	21.9	673939	377676	242995	4.55179e+06	2.91887e+06	4.60511e+06	4.1266e+06	3.26093e+06	5.61731e+06	7.29756e+06	4.4706e+06	7.20286e+06
P97789	5'-3' exoribonuclease 1 OS=Mus musculus OX=10090 GN=Xrn1 PE=1 SV=1	194.2				367494	377735			383668	242883	199078	350741	185400
Q8BJ05	Zinc finger CCCH domain-containing protein 14 OS=Mus musculus OX=10090 GN=Zc3h14 PE=1 SV=1	82.4							183221	294149		66176.6
P70303	CTP synthase 2 OS=Mus musculus OX=10090 GN=Ctps2 PE=1 SV=1	65.5		301762		400393	550594	425671	105396	146870	148370	274355	310696	279382
P06745	Glucose-6-phosphate isomerase OS=Mus musculus OX=10090 GN=Gpi PE=1 SV=4	62.7	5.44581e+07	5.36394e+07	5.50974e+07	4.30185e+08	5.99449e+08	4.17849e+08	1.03676e+08	1.16967e+08	1.04556e+08	1.21111e+08	1.76685e+08	1.23518e+08
Q99LG2	Transportin-2 OS=Mus musculus OX=10090 GN=Tnpo2 PE=1 SV=1	100.4	3.0057e+06	2.71332e+06	3.17968e+06	9.46175e+06	1.02996e+07	7.95551e+06	1.84223e+07	1.82321e+07	1.35114e+07	8.08503e+06	8.52816e+06	6.10046e+06
Q9Z0R9	Fatty acid desaturase 2 OS=Mus musculus OX=10090 GN=Fads2 PE=1 SV=1	52.4			34310.9	1.05836e+06	804909	831424	398465	561312	189009	3.27215e+06	2.18114e+06	3.05037e+06
P49717	DNA replication licensing factor MCM4 OS=Mus musculus OX=10090 GN=Mcm4 PE=1 SV=1	96.7	2.72337e+07	2.48568e+07	4.42214e+07	9.2458e+06	1.53257e+07	2.16337e+07	8.90567e+07	9.89055e+07	1.0099e+08	6.38414e+06	7.37314e+06	5.96729e+06
Q9DB43	Zinc finger protein-like 1 OS=Mus musculus OX=10090 GN=Zfpl1 PE=1 SV=1	34.1	159842	176346		369678	161437		184104	267618	429142	222619	77338.3
Q9CQQ7	ATP synthase F(0) complex subunit B1, mitochondrial OS=Mus musculus OX=10090 GN=Atp5pb PE=1 SV=1	28.9	1.71086e+07	1.30649e+07	1.67158e+07	2.2265e+07	1.56221e+07	1.23153e+07	4.1002e+07	3.48417e+07	3.94147e+07	8.68029e+06	5.07857e+06	4.49908e+06
Q9D6U8	Protein FAM162A OS=Mus musculus OX=10090 GN=Fam162a PE=1 SV=1	17.7	820019	759189	1.27186e+06	2.12901e+06	1.73565e+06	2.39155e+06	1.25391e+06	1.95944e+06	1.42706e+06	993153	216552	558290
Q91YD3	mRNA-decapping enzyme 1A OS=Mus musculus OX=10090 GN=Dcp1a PE=1 SV=1	65.2							806563	1.0756e+06	909782	725328	191463	56912.4
F6ZDS4	Nucleoprotein TPR OS=Mus musculus OX=10090 GN=Tpr PE=1 SV=1	273.8	7.8373e+06	7.66093e+06	2.6921e+06	5.22864e+06	4.17569e+06	4.18738e+06	3.62335e+07	3.96979e+07	2.09177e+07	4.67933e+06	4.37006e+06	2.542e+06
P61079	Ubiquitin-conjugating enzyme E2 D3 OS=Mus musculus OX=10090 GN=Ube2d3 PE=1 SV=1	16.7	8.58246e+06	9.39731e+06	7.46666e+06	1.94666e+07	2.9864e+07	1.49715e+07	3.36167e+07	41062989	2.83138e+07	1.67165e+07	9.74611e+06	1.05741e+07
Q8BJU0	Small glutamine-rich tetratricopeptide repeat-containing protein alpha OS=Mus musculus OX=10090 GN=Sgta PE=1 SV=2	34.3	1.9897e+06	1.9858e+06	2.54864e+06	1.61725e+07	1.44499e+07	1.37283e+07	9.10351e+06	1.0724e+07	9.85691e+06	1.15827e+07	8.57297e+06	9.40136e+06
Q8BKX6	Serine/threonine-protein kinase SMG1 OS=Mus musculus OX=10090 GN=Smg1 PE=1 SV=3	409.5	268887	330028	333131	4.5556e+06	3.36081e+06	1.42744e+06	1.48955e+06	1.46425e+06	1.37989e+06	3.53871e+06	2.33342e+06	819952
Q7TMF3	NADH dehydrogenase [ubiquinone] 1 alpha subcomplex subunit 12 OS=Mus musculus OX=10090 GN=Ndufa12 PE=1 SV=2	17.1	215542	338928	360767	341280	190702	111650	2.95903e+06	2.09447e+06	1.83547e+06	216922	252424	174035
Q62393	Tumor protein D52 OS=Mus musculus OX=10090 GN=Tpd52 PE=1 SV=2	24.3	2.36694e+06	2.11285e+06	2.267e+06	6.36198e+06	5.2096e+06	6.06905e+06	5.41438e+06	6.00498e+06	6.93755e+06	2.18036e+06	2.36734e+06	2.35032e+06
Q03173	Protein enabled homolog OS=Mus musculus OX=10090 GN=Enah PE=1 SV=2	85.8	3.85005e+06	3.37923e+06	5.05111e+06	1.0042e+07	7.83592e+06	8.31232e+06	1.57667e+07	1.98258e+07	1.87362e+07	7.49262e+06	3.70772e+06	6.34972e+06
Q07139	Protein ECT2 OS=Mus musculus OX=10090 GN=Ect2 PE=1 SV=2	103.1							4.2083e+06	4.96274e+06	3.22576e+06	797565	978996	744073
Q8CI32	BAG family molecular chaperone regulator 5 OS=Mus musculus OX=10090 GN=Bag5 PE=1 SV=1	50.9	796417	296127	80235.2	2.9778e+06	2.62773e+06	9.27418e+06	896380	1.71167e+06	193953	1.40972e+06	1.13815e+06	2.14597e+06
Q9WU28	Prefoldin subunit 5 OS=Mus musculus OX=10090 GN=Pfdn5 PE=1 SV=1	17.3	4.00693e+06	2.9724e+06	4.67389e+06	1.66037e+07	1.4433e+07	1.45529e+07	1.18433e+07	9.952e+06	1.31899e+07	7.04252e+06	6.80673e+06	6.12179e+06
Q9CQW9	Interferon-induced transmembrane protein 3 OS=Mus musculus OX=10090 GN=Ifitm3 PE=1 SV=1	14.9	215274	268618	350852		102140		3.18878e+06	5.25214e+06	5.64159e+06	173624		146007
P62878	E3 ubiquitin-protein ligase RBX1 OS=Mus musculus OX=10090 GN=Rbx1 PE=1 SV=1	12.3	435108	618726	691360	1.34913e+06	1.4447e+06	1.36167e+06	3.0564e+06	2.9742e+06	2.81741e+06	1.5534e+06	856364	825214
Q9CPR1	RWD domain-containing protein 4 OS=Mus musculus OX=10090 GN=Rwdd4 PE=2 SV=1	21.1		79261.8	118381	116108	307131	277138	619892	620744	426242	353170	462497	320502
Q9Z160	Conserved oligomeric Golgi complex subunit 1 OS=Mus musculus OX=10090 GN=Cog1 PE=1 SV=3	109							159838		506187		167396
Q8R1Q8	Cytoplasmic dynein 1 light intermediate chain 1 OS=Mus musculus OX=10090 GN=Dync1li1 PE=1 SV=1	56.6	3.33897e+06	3.54197e+06	4.01135e+06	3.36201e+07	2.99974e+07	2.28351e+07	8.93089e+06	1.00519e+07	1.02299e+07	1.28782e+07	1.14964e+07	8.99926e+06
Q9D198	Pre-mRNA-splicing factor SYF2 OS=Mus musculus OX=10090 GN=Syf2 PE=2 SV=1	28.7		513603					265511	162258	150730
Q6ZPL9	ATP-dependent RNA helicase DDX55 OS=Mus musculus OX=10090 GN=Ddx55 PE=1 SV=2	68.4			94672				1.21097e+06	899514	1438536	192765	57513.7	141715
Q80W21	Glutathione S-transferase Mu 7 OS=Mus musculus OX=10090 GN=Gstm7 PE=1 SV=1	25.7	1.664e+06	2.46798e+06	1.32014e+06	2.44298e+07	1.61055e+07	1.89729e+07	3.51341e+06	5.18084e+06	4.55858e+06	6.52916e+06	6.0079e+06	8.6335e+06
Q99JX4	Eukaryotic translation initiation factor 3 subunit M OS=Mus musculus OX=10090 GN=Eif3m PE=1 SV=1	42.5	2.40646e+07	2.38016e+07	2.05035e+07	3.0077e+07	3.43871e+07	3.20947e+07	6.31878e+07	7.29519e+07	5.54801e+07	1.33169e+07	1.43547e+07	1.12022e+07
Q920Q6	RNA-binding protein Musashi homolog 2 OS=Mus musculus OX=10090 GN=Msi2 PE=1 SV=1	36.9	424388	670734	105838	2.99892e+06	1.74503e+06	3.1803e+06	2.28963e+06	2.08868e+06	1.03723e+06	1.9993e+06	2.67218e+06	1.51003e+06
Q9DCH4	Eukaryotic translation initiation factor 3 subunit F OS=Mus musculus OX=10090 GN=Eif3f PE=1 SV=2	38	1.61126e+07	1.97626e+07	1.42519e+07	2.31907e+07	2.91572e+07	1.88426e+07	4.50753e+07	5.49235e+07	3.80637e+07	8.55448e+06	1.09672e+07	8.27084e+06
O08547	Vesicle-trafficking protein SEC22b OS=Mus musculus OX=10090 GN=Sec22b PE=1 SV=3	24.7	1.67833e+06	1.34239e+06	1.69633e+06	1.25163e+07	7.44634e+06	7.13862e+06	3.13656e+06	3.19368e+06	3.86787e+06	2.81797e+06	2.44105e+06	2.86579e+06
Q8BI72	CDKN2A-interacting protein OS=Mus musculus OX=10090 GN=Cdkn2aip PE=1 SV=1	59.7	378863	299589			457050	202820	51133.2	80780.7	86304.2
Q9EQQ2	Protein YIPF5 OS=Mus musculus OX=10090 GN=Yipf5 PE=1 SV=1	27.9	38097.7	63098.5	140704	306816	259368	417207	277023	349376	478613	262309	178444	283097
Q8R0J7	Vacuolar protein sorting-associated protein 37B OS=Mus musculus OX=10090 GN=Vps37b PE=1 SV=1	31			348343	1.02749e+06	1.11645e+06	1.10155e+06	424181	677783		805313	1.54948e+06	406007
P97477	Aurora kinase A OS=Mus musculus OX=10090 GN=Aurka PE=1 SV=1	44.7							2.41209e+06	3.45991e+06	493541	361097	417489	273044
Q3U3T8	WD repeat-containing protein 62 OS=Mus musculus OX=10090 GN=Wdr62 PE=1 SV=2	167.2							40876.9	56842.5	92907.1
P28740	Kinesin-like protein KIF2A OS=Mus musculus OX=10090 GN=Kif2a PE=1 SV=2	79.7	1.07796e+06	666635	359279	4.0955e+06	2.28894e+06	3.50465e+06	5.81701e+06	5.64054e+06	3.52569e+06	5.16633e+06	2.68466e+06	3.08533e+06
Q9DBY8	Nuclear valosin-containing protein-like OS=Mus musculus OX=10090 GN=Nvl PE=1 SV=1	94.4	129400	53969.1	106757				5.19435e+06	4.51562e+06	2.11202e+06		410556	153621
Q9JIK9	28S ribosomal protein S34, mitochondrial OS=Mus musculus OX=10090 GN=Mrps34 PE=1 SV=1	25.8	254795	656093	190982		39510.5		1.45235e+06	1.64732e+06	1.05515e+06
Q99PU8	ATP-dependent RNA helicase DHX30 OS=Mus musculus OX=10090 GN=Dhx30 PE=1 SV=1	136.6	552071	1109890	726625	283404	700927	2.23802e+06	7.08169e+06	7.20818e+06	8.6186e+06	999335	1.15998e+06	1.08482e+06
Q9EPU0	Regulator of nonsense transcripts 1 OS=Mus musculus OX=10090 GN=Upf1 PE=1 SV=2	123.9	4.62773e+06	5.15742e+06	4.94752e+06	1.25594e+07	8.82267e+06	1.22906e+07	2.33199e+07	2.97022e+07	2.69316e+07	8.27176e+06	7.78726e+06	9.55845e+06
Q9Z1R2	Large proline-rich protein BAG6 OS=Mus musculus OX=10090 GN=Bag6 PE=1 SV=1	121	4.02855e+06	3.90546e+06	3.60789e+06	9.92352e+06	9.43416e+06	8.90644e+06	1.89801e+07	2.38636e+07	2.17794e+07	9.45181e+06	7.82725e+06	5.58296e+06
P23198	Chromobox protein homolog 3 OS=Mus musculus OX=10090 GN=Cbx3 PE=1 SV=2	20.8	4.78068e+06	6.73811e+06	4.42458e+06	5.88783e+06	3.73897e+06	4.55805e+06	9.23392e+06	1.47267e+07	4.74604e+06	2.12901e+06	983834	617208
P55821	Stathmin-2 OS=Mus musculus OX=10090 GN=Stmn2 PE=1 SV=1	20.8	1.17486e+06		230662	827596	2981051	676858	2.22213e+06	2.46663e+06	1.81538e+06	3.13156e+06	2.91194e+06	1.8371e+06
P54227	Stathmin OS=Mus musculus OX=10090 GN=Stmn1 PE=1 SV=2	17.3	8.70759e+06	8.5044e+06	1.09022e+07	1.52781e+08	1.42026e+08	1.34671e+08	4.37536e+07	5.2381e+07	5.5494e+07	1.25229e+08	1.0557e+08	9.88503e+07
Q9EP53	Hamartin OS=Mus musculus OX=10090 GN=Tsc1 PE=1 SV=1	128.7						65857.6			71854.4
Q8K4X7	1-acyl-sn-glycerol-3-phosphate acyltransferase delta OS=Mus musculus OX=10090 GN=Agpat4 PE=1 SV=1	43.8		65444.2	51054	460149	366660	290920	132420	139392			285624	330404
Q8R1F1	Niban-like protein 1 OS=Mus musculus OX=10090 GN=Fam129b PE=1 SV=2	84.8	1.73004e+06	1.72496e+06	2.37093e+06	2.90182e+06	1833795	2.11367e+06	1.25719e+07	1.14851e+07	1.44399e+07	2.47419e+06	2.06459e+06	1.83287e+06
P10711	Transcription elongation factor A protein 1 OS=Mus musculus OX=10090 GN=Tcea1 PE=1 SV=2	33.9	6.8587e+06	5.8752e+06	1.02911e+07	1.45208e+07	1.57642e+07	1.59566e+07	2.34188e+07	2.30864e+07	2.76889e+07	7.1571e+06	5.97909e+06	8.65626e+06
Q99N95	39S ribosomal protein L3, mitochondrial OS=Mus musculus OX=10090 GN=Mrpl3 PE=1 SV=1	39.1	56044.7		67122.8				165383	274906	172207
Q9WTX6	Cullin-1 OS=Mus musculus OX=10090 GN=Cul1 PE=1 SV=1	89.6	1.89861e+06	2.24877e+06	2.24585e+06	8.25871e+06	9.88867e+06	7.54197e+06	9.34106e+06	1.17543e+07	9.8677e+06	5.2361e+06	7.28305e+06	5.11017e+06
P48432	Transcription factor SOX-2 OS=Mus musculus OX=10090 GN=Sox2 PE=1 SV=2	34.4	161483	823774	160818	154215	428541	275717	5.77351e+06	4.4044e+06	4.80004e+06	2.02929e+06	192613	742491
P99028	Cytochrome b-c1 complex subunit 6, mitochondrial OS=Mus musculus OX=10090 GN=Uqcrh PE=1 SV=2	10.4	2.63539e+06	4.11512e+06	3.51395e+06	3.68238e+06	2.0739e+06	2.62483e+06	8.62781e+06	1.02003e+07	7.51695e+06	1.14846e+06	858695	984252
Q9Z1Z0	General vesicular transport factor p115 OS=Mus musculus OX=10090 GN=Uso1 PE=1 SV=2	106.9	4.83747e+06	4.6151e+06	6.07265e+06	1.92846e+07	1.90535e+07	1.4674e+07	1.62627e+07	1.69972e+07	1.42816e+07	7.62074e+06	7.34748e+06	7.77136e+06
O88738	Baculoviral IAP repeat-containing protein 6 OS=Mus musculus OX=10090 GN=Birc6 PE=1 SV=2	531.8	5.02633e+06	7.36541e+06	3.82814e+06	7.63645e+06	7.29638e+06	1.00938e+07	1.79905e+07	2.15676e+07	1.99219e+07	5.50972e+06	3.68762e+06	4.16332e+06
O88811	Signal transducing adapter molecule 2 OS=Mus musculus OX=10090 GN=Stam2 PE=1 SV=1	57.4	50726.6	110997	159699	324254	530377	542084	1.15344e+06	1.44172e+06	1.57146e+06	1.08772e+06	678592	1.01173e+06
Q8K2M0	39S ribosomal protein L38, mitochondrial OS=Mus musculus OX=10090 GN=Mrpl38 PE=1 SV=2	45	192742	163402	215756	168910		248646	1.37457e+06	1.25587e+06	1.46877e+06	121732		355255
Q8BP67	60S ribosomal protein L24 OS=Mus musculus OX=10090 GN=Rpl24 PE=1 SV=2	17.8	3.18067e+07	2.92322e+07	2.78985e+07	3.43379e+07	4.53901e+07	3.87047e+07	8.20619e+07	8.56499e+07	7.16241e+07	1.19824e+07	1.57563e+07	1.70597e+07
Q60932	Voltage-dependent anion-selective channel protein 1 OS=Mus musculus OX=10090 GN=Vdac1 PE=1 SV=3	32.3	4.40252e+07	4.56345e+07	3.37828e+07	3.99903e+07	2.80455e+07	2.66893e+07	7.69859e+07	9.16997e+07	6.34817e+07	9.51938e+06	7.57791e+06	7.51985e+06
P62746	Rho-related GTP-binding protein RhoB OS=Mus musculus OX=10090 GN=Rhob PE=1 SV=1	22.1				976920	814425	494329				402250	135328	141042
O70310	Glycylpeptide N-tetradecanoyltransferase 1 OS=Mus musculus OX=10090 GN=Nmt1 PE=1 SV=1	56.9	8.01537e+06	9.85777e+06	6.84267e+06	1.43998e+07	1.91073e+07	1.39342e+07	2.4482e+07	2.61166e+07	1.68694e+07	6.72765e+06	6.32349e+06	4.91472e+06
Q3UYV9	Nuclear cap-binding protein subunit 1 OS=Mus musculus OX=10090 GN=Ncbp1 PE=1 SV=2	91.9	1.82612e+06	968978	1.5612e+06	3.02391e+06	3.64419e+06	3.51184e+06	5.35575e+06	6.43543e+06	4.14737e+06	1.74272e+06	1.92396e+06	1.62992e+06
P53996	Cellular nucleic acid-binding protein OS=Mus musculus OX=10090 GN=Cnbp PE=1 SV=2	19.6	9.35216e+06	7.17111e+06	3.61807e+06	8.97752e+06	8.90297e+06	1.14685e+07	3.48327e+07	3.69521e+07	3.49e+07	7.02188e+06	7.03493e+06	9.37408e+06
P18760	Cofilin-1 OS=Mus musculus OX=10090 GN=Cfl1 PE=1 SV=3	18.5	1.00812e+08	1.03028e+08	9.92373e+07	6.00217e+08	4.24272e+08	4.10111e+08	2.88058e+08	3.45938e+08	3.01489e+08	2.38064e+08	1.86941e+08	186642634
Q99K48	Non-POU domain-containing octamer-binding protein OS=Mus musculus OX=10090 GN=Nono PE=1 SV=3	54.5	1.63661e+07	1.44906e+07	8.48804e+06	1.99463e+07	1.8778e+07	2.16667e+07	4.26648e+07	4.30384e+07	2.09529e+07	5.98893e+06	9.30422e+06	7.59412e+06
Q14BV6	Carbohydrate deacetylase OS=Mus musculus OX=10090 GN=Ydjc PE=2 SV=2	33.1							86770.1	115439
Q9D8B3	Charged multivesicular body protein 4b OS=Mus musculus OX=10090 GN=Chmp4b PE=1 SV=2	24.9	1.38384e+06	741918	1.73703e+06	4.90803e+06	5.41286e+06	6.66285e+06	6.22529e+06	8.552e+06	7.57774e+06	4.65174e+06	4.02391e+06	5.82507e+06
Q91YD9	Neural Wiskott-Aldrich syndrome protein OS=Mus musculus OX=10090 GN=Wasl PE=1 SV=1	54.2	125613	198715	175842	743684	287008	560141	1.58048e+06	1.75431e+06	1.12239e+06	787073	513937	567810
Q8K3F7	L-threonine 3-dehydrogenase, mitochondrial OS=Mus musculus OX=10090 GN=Tdh PE=1 SV=1	41.4	3.35247e+07	3.52511e+07	3.99304e+07	8.82165e+06	10345338	5.02045e+06	1.23371e+08	1.28287e+08	1.61802e+08	4.6801e+06	4.47736e+06	3.19752e+06
P56812	Programmed cell death protein 5 OS=Mus musculus OX=10090 GN=Pdcd5 PE=1 SV=3	14.3	3.35234e+06	3.22446e+06	4.78337e+06	1.40727e+07	1.49147e+07	1.7213e+07	9.1014e+06	9.80873e+06	1.05834e+07	5.64473e+06	5.525e+06	5.70237e+06
P62869	Elongin-B OS=Mus musculus OX=10090 GN=Elob PE=1 SV=1	13.2	4.46702e+06	3.57911e+06	3.92854e+06	1.29427e+07	12333825	1.2572e+07	2.6728e+07	2.42473e+07	2.34783e+07	1.14312e+07	1.15543e+07	9.9108e+06
P07742	Ribonucleoside-diphosphate reductase large subunit OS=Mus musculus OX=10090 GN=Rrm1 PE=1 SV=2	90.2	1.08641e+07	9.46358e+06	1.17559e+07	1.86182e+07	2.46799e+07	2.6397e+07	5.32743e+07	5.53048e+07	5.25762e+07	1.26979e+07	1.71267e+07	1.91785e+07
Q9WU62	Inner centromere protein OS=Mus musculus OX=10090 GN=Incenp PE=1 SV=2	101.1	94782.8		89054.3	187933		200392	152945	162882	229153	92652.1		84667.7
P62737	Actin, aortic smooth muscle OS=Mus musculus OX=10090 GN=Acta2 PE=1 SV=1	42	5.0555e+07	6.38061e+07	6.20418e+07	3.89925e+08	2.60551e+08	3.02778e+08	1.27958e+08	1.89891e+08	1.4644e+08	1.35686e+08	9.40702e+07	1.14178e+08
Q9CR57	60S ribosomal protein L14 OS=Mus musculus OX=10090 GN=Rpl14 PE=1 SV=3	23.5	3.04385e+07	2.86294e+07	2.84283e+07	3.04889e+07	4.47828e+07	4.12173e+07	7.14366e+07	7.6142e+07	6.67716e+07	1.1248e+07	1.4003e+07	1.39546e+07
Q91VR2	ATP synthase subunit gamma, mitochondrial OS=Mus musculus OX=10090 GN=Atp5f1c PE=1 SV=1	32.9	1.18971e+07	1.02104e+07	9.42454e+06	1.57609e+07	1.5744e+07	9.89351e+06	2.47658e+07	2.06619e+07	2.17886e+07	4.58721e+06	4.5957e+06	3.01366e+06
Q9CQF9	Prenylcysteine oxidase OS=Mus musculus OX=10090 GN=Pcyox1 PE=1 SV=1	56.5	463396	263473	916245	2.16816e+07	1.33868e+07	1.60007e+07	1.01487e+06	998592	1.08416e+06	6.52064e+06	4.24346e+06	4.35793e+06
Q9CPQ1	Cytochrome c oxidase subunit 6C OS=Mus musculus OX=10090 GN=Cox6c PE=1 SV=3	8.5	3.2928e+06	2.26955e+06	2.65023e+06	7.31337e+06	7.21611e+06	6.20668e+06	8.13294e+06	6.36048e+06	7.53434e+06	2375895	2.16966e+06	3.30011e+06
Q9QZE5	Coatomer subunit gamma-1 OS=Mus musculus OX=10090 GN=Copg1 PE=1 SV=1	97.5	6.43033e+06	5.71137e+06	6.78873e+06	2.91964e+07	2.51975e+07	2.34601e+07	2.4873e+07	3.00504e+07	2.54762e+07	1.63664e+07	1.53292e+07	1.38642e+07
P35486	Pyruvate dehydrogenase E1 component subunit alpha, somatic form, mitochondrial OS=Mus musculus OX=10090 GN=Pdha1 PE=1 SV=1	43.2	7.7604e+06	9.18781e+06	8.36678e+06	9.82194e+06	1.14639e+07	8.36508e+06	2.09514e+07	2.87677e+07	2.22341e+07	5.88962e+06	3.14414e+06	3.01233e+06
Q3TQQ9	Uncharacterized protein C1orf112 homolog OS=Mus musculus OX=10090 PE=1 SV=2	101.2	1.89289e+06						1.41669e+06	842775	1.56525e+06	61852.8	31769.9	54278
P36536	GTP-binding protein SAR1a OS=Mus musculus OX=10090 GN=Sar1a PE=1 SV=1	22.4	1.21385e+06	1.07937e+06	1.21272e+06	5.65195e+06	3924057	3.76186e+06	4.61292e+06	4.85464e+06	4.81805e+06	4150798	1.44804e+06	2.47525e+06
Q9EPE9	Manganese-transporting ATPase 13A1 OS=Mus musculus OX=10090 GN=Atp13a1 PE=1 SV=2	132.3	106845	126215	316544	182496	122537	259847	1.62529e+06	1.86631e+06	2.70776e+06	793816	374156	98795.5
Q9DC61	Mitochondrial-processing peptidase subunit alpha OS=Mus musculus OX=10090 GN=Pmpca PE=1 SV=1	58.2	4.92389e+06	5.2834e+06	3.85632e+06	6.31765e+06	8.14626e+06	6.60468e+06	7.02091e+06	1.0697e+07	8.52153e+06	1.22337e+06	2.32439e+06	1.99959e+06
Q91VK1	Basic leucine zipper and W2 domain-containing protein 2 OS=Mus musculus OX=10090 GN=Bzw2 PE=1 SV=1	48	9.68132e+06	9.86145e+06	9.39974e+06	3.2065e+07	3.4466e+07	2.54117e+07	4.8315e+07	4.78194e+07	5.01494e+07	2.60581e+07	2.06287e+07	1.76174e+07
Q60737	Casein kinase II subunit alpha OS=Mus musculus OX=10090 GN=Csnk2a1 PE=1 SV=2	45.1	7.91754e+06	8.75663e+06	7.7695e+06	1.44394e+07	1.35747e+07	1.36441e+07	2.89111e+07	3.29924e+07	2.32075e+07	6.39865e+06	6.54078e+06	6.85075e+06
Q8CIE6	Coatomer subunit alpha OS=Mus musculus OX=10090 GN=Copa PE=1 SV=2	138.3	1.05012e+07	8.18362e+06	1.32416e+07	5.92117e+07	4.93579e+07	5.05073e+07	3.29929e+07	3.65476e+07	4.51615e+07	2.52667e+07	2.64723e+07	2.75018e+07
Q9EPL8	Importin-7 OS=Mus musculus OX=10090 GN=Ipo7 PE=1 SV=2	119.4	2.11908e+07	1.77389e+07	3.00758e+07	4.25202e+07	4.77987e+07	4.72172e+07	8.75043e+07	8.44967e+07	1.0185e+08	2.19345e+07	2.50576e+07	3.02336e+07
P56382	ATP synthase subunit epsilon, mitochondrial OS=Mus musculus OX=10090 GN=Atp5f1e PE=1 SV=2	5.8	742582	461101	644959	2.61736e+06	1.34074e+06	1.75375e+06	1.67913e+06	1.04414e+06	1.52854e+06	422755	541257	846267
Q9D0F1	Kinetochore protein NDC80 homolog OS=Mus musculus OX=10090 GN=Ndc80 PE=1 SV=1	73.9							552970	449419				181865
Q9D083	Kinetochore protein Spc24 OS=Mus musculus OX=10090 GN=Spc24 PE=1 SV=1	23.4	123846	706346	165937	300526	155031	477380	5.45985e+06	5.49382e+06	4.90517e+06	433277	1.3904e+06	967677
P61982	14-3-3 protein gamma OS=Mus musculus OX=10090 GN=Ywhag PE=1 SV=2	28.3	5.29414e+07	6.19034e+07	4.49648e+07	3.62789e+08	2.02981e+08	1.66082e+08	1.59516e+08	2.2705e+08	1.35494e+08	1.77687e+08	8.03167e+07	7.37336e+07
Q3UL36	Arginine and glutamate-rich protein 1 OS=Mus musculus OX=10090 GN=Arglu1 PE=1 SV=2	32.9							110884	71759.5
P17426	AP-2 complex subunit alpha-1 OS=Mus musculus OX=10090 GN=Ap2a1 PE=1 SV=1	107.6	1.25139e+07	1.35223e+07	1.13857e+07	1.14288e+08	8.00236e+07	7.49215e+07	3.02067e+07	4.08187e+07	3.4518e+07	4.30126e+07	2.82104e+07	3.19931e+07
O08759	Ubiquitin-protein ligase E3A OS=Mus musculus OX=10090 GN=Ube3a PE=1 SV=2	99.8	1.38865e+06	1.80735e+06	1.31178e+06	1.48648e+07	1.26916e+07	1.14191e+07	7.45328e+06	8.84174e+06	7.32431e+06	1.339e+07	8.67367e+06	6.96253e+06
Q05793	Basement membrane-specific heparan sulfate proteoglycan core protein OS=Mus musculus OX=10090 GN=Hspg2 PE=1 SV=1	398							2.74799e+06	3.27225e+06	777464	160063	466192	609706
Q9JHU4	Cytoplasmic dynein 1 heavy chain 1 OS=Mus musculus OX=10090 GN=Dync1h1 PE=1 SV=2	531.7	5.08458e+07	6.07523e+07	5.75779e+07	7.90037e+08	6.73291e+08	4.82037e+08	1.7368e+08	1.86165e+08	1.67245e+08	3.46453e+08	2.7744e+08	2.06839e+08
P68373	Tubulin alpha-1C chain OS=Mus musculus OX=10090 GN=Tuba1c PE=1 SV=1	49.9	4.73092e+08	4.77031e+08	4.6707e+08	6.90717e+09	4.22134e+09	3.63477e+09	1.29785e+09	1.53097e+09	1.22832e+09	2.63695e+09	1.58988e+09	1.49169e+09
Q9JJI8	60S ribosomal protein L38 OS=Mus musculus OX=10090 GN=Rpl38 PE=1 SV=3	8.2	1.07133e+07	1.19122e+07	1.03254e+07	13074280	1.97669e+07	1.21249e+07	3.2096e+07	3.86822e+07	33084380	6.16526e+06	7.02447e+06	5.74779e+06
Q6A4J8	Ubiquitin carboxyl-terminal hydrolase 7 OS=Mus musculus OX=10090 GN=Usp7 PE=1 SV=1	128.4	1.44382e+07	9.5427e+06	1.02628e+07	1.60454e+07	1.13117e+07	1.37365e+07	5.02687e+07	5.37119e+07	4.79937e+07	9.70272e+06	7.63809e+06	7.85285e+06
Q61166	Microtubule-associated protein RP/EB family member 1 OS=Mus musculus OX=10090 GN=Mapre1 PE=1 SV=3	30	4.28233e+06	5.78613e+06	5.87247e+06	6.45729e+07	4.38524e+07	3.67555e+07	1.94616e+07	1.78306e+07	1.95877e+07	3.09188e+07	2.09513e+07	1.91096e+07
Q921G8	Gamma-tubulin complex component 2 OS=Mus musculus OX=10090 GN=Tubgcp2 PE=1 SV=2	103.2		198411			276757		235595	252544	506284	113893	53702.4	40827.5
Q8CDN6	Thioredoxin-like protein 1 OS=Mus musculus OX=10090 GN=Txnl1 PE=1 SV=3	32.2	6.78907e+06	6.54108e+06	5.93558e+06	3.29604e+07	2.93634e+07	2.21158e+07	2.67274e+07	3.26405e+07	2.45242e+07	1.28365e+07	1.05541e+07	3.26453e+07
Q91YI0	Argininosuccinate lyase OS=Mus musculus OX=10090 GN=Asl PE=1 SV=1	51.7	597450	573746	466077	5254512	5.03411e+06	4.03592e+06	1.4125e+06	1.85617e+06	1.69066e+06	2.96397e+06	1.57678e+06	1.61309e+06
Q8CCS6	Polyadenylate-binding protein 2 OS=Mus musculus OX=10090 GN=Pabpn1 PE=1 SV=3	32.3	8.1301e+06	3.7145e+06	5.66037e+06	5.71747e+06	4851706	5.0724e+06	1.10781e+07	1.13814e+07	5.36983e+06	988552	1.78016e+06	804048
P63260	Actin, cytoplasmic 2 OS=Mus musculus OX=10090 GN=Actg1 PE=1 SV=1	41.8	5.08668e+08	5.93921e+08	5.84209e+08	4.60007e+09	2.58687e+09	3.45822e+09	1.36944e+09	1.78905e+09	1.47123e+09	1.65916e+09	9.54295e+08	1.34706e+09
Q91YP3	Deoxyribose-phosphate aldolase OS=Mus musculus OX=10090 GN=Dera PE=1 SV=1	35	481387	391031	1.18549e+06	494379	1.13945e+06	770342	4.33772e+06	4.23827e+06	3.77984e+06	296860	764161	1.51109e+06
P38647	Stress-70 protein, mitochondrial OS=Mus musculus OX=10090 GN=Hspa9 PE=1 SV=3	73.4	6.17772e+07	5.76258e+07	7.83574e+07	8.10833e+07	9.32755e+07	1.01697e+08	1.74914e+08	1.78731e+08	2.24214e+08	3.40027e+07	3.58023e+07	4.02372e+07
Q9CQ75	NADH dehydrogenase [ubiquinone] 1 alpha subcomplex subunit 2 OS=Mus musculus OX=10090 GN=Ndufa2 PE=1 SV=3	10.9	747453	556561	485786	767973	1.23067e+06	975272	3.46001e+06	2.57701e+06	3.24219e+06	360384	978114	943912
Q99P88	Nuclear pore complex protein Nup155 OS=Mus musculus OX=10090 GN=Nup155 PE=1 SV=1	155	6.45552e+06	7.58484e+06	4.52392e+06	3.42915e+06	2.22177e+06	1.91685e+06	2.85521e+07	3.34121e+07	2.20896e+07	1.35486e+06	1.64653e+06	1.56664e+06
Q62188	Dihydropyrimidinase-related protein 3 OS=Mus musculus OX=10090 GN=Dpysl3 PE=1 SV=1	61.9	2.46081e+06	3.40122e+06	959822	5.08705e+08	2.66651e+08	2.73369e+08	6.08664e+06	6.65536e+06	7.44402e+06	2.17295e+08	1.17681e+08	1.36812e+08
Q8BGC0	HIV Tat-specific factor 1 homolog OS=Mus musculus OX=10090 GN=Htatsf1 PE=1 SV=1	86.2	73096.7	59663.1	66471	94287	163115	222537	171386	203904	169155	80863.2		166109
Q9CWH5	tRNA (guanine(10)-N2)-methyltransferase homolog OS=Mus musculus OX=10090 GN=Trmt11 PE=1 SV=1	52.9							1.81382e+06	1.10939e+06	2.25834e+06	170843	735917	345117
Q9DCT8	Cysteine-rich protein 2 OS=Mus musculus OX=10090 GN=Crip2 PE=1 SV=1	22.7	1.94378e+06	1.83024e+06	2.70149e+06	8.01333e+06	9.4589e+06	7.14021e+06	8.90358e+06	9.66636e+06	8.77087e+06	4.99829e+06	5.07773e+06	4.19916e+06
O88342	WD repeat-containing protein 1 OS=Mus musculus OX=10090 GN=Wdr1 PE=1 SV=3	66.4	3.81891e+06	4.05882e+06	6.10248e+06	2.39962e+07	3.12197e+07	2.06419e+07	1.21199e+07	1.24504e+07	1.57263e+07	9.17399e+06	1.08981e+07	9.71738e+06
Q4VBE8	WD repeat-containing protein 18 OS=Mus musculus OX=10090 GN=Wdr18 PE=1 SV=1	47.2	1.85926e+06	2.50068e+06	1.84124e+06	1.82946e+06	2.16591e+06	1.86012e+06	8.16068e+06	1.03702e+07	5.26292e+06	759864	1.07713e+06	1.17116e+06
Q9R1P3	Proteasome subunit beta type-2 OS=Mus musculus OX=10090 GN=Psmb2 PE=1 SV=1	22.9	1.53538e+07	1.76693e+07	1.89348e+07	8.57014e+07	6.43272e+07	5.80864e+07	4.42096e+07	5.38079e+07	4.49403e+07	4.06087e+07	1.77933e+07	2.30376e+07
Q3THG9	Alanyl-tRNA editing protein Aarsd1 OS=Mus musculus OX=10090 GN=Aarsd1 PE=1 SV=2	44.9	495503	501788	786730	2.72548e+06	1.88909e+06	1.64495e+06	2.99567e+06	3.35259e+06	3.67065e+06	1.54898e+06	1.89099e+06	1.35859e+06
Q80SZ7	Guanine nucleotide-binding protein G(I)/G(S)/G(O) subunit gamma-5 OS=Mus musculus OX=10090 GN=Gng5 PE=1 SV=2	7.3		56187		76095.8		764252	1.48497e+06	510897	1.16417e+06	1.15528e+06	334857	1205488
P51150	Ras-related protein Rab-7a OS=Mus musculus OX=10090 GN=Rab7a PE=1 SV=2	23.5	6.97667e+06	8.82851e+06	6.74293e+06	4.30179e+07	3.79786e+07	3.30625e+07	3.21522e+07	3.84936e+07	3.22928e+07	3.07071e+07	1.78442e+07	2.35266e+07
Q8BG51	Mitochondrial Rho GTPase 1 OS=Mus musculus OX=10090 GN=Rhot1 PE=1 SV=1	72.2							1.45857e+06	1.65815e+06	1.26517e+06	498027	234812	182702
Q9R0P5	Destrin OS=Mus musculus OX=10090 GN=Dstn PE=1 SV=3	18.5	3.15217e+07	2.72989e+07	3.21827e+07	1.14015e+08	9.10178e+07	6.69358e+07	1.07409e+08	1.01444e+08	9.51295e+07	4.6607e+07	4.08545e+07	3.38118e+07
O35887	Calumenin OS=Mus musculus OX=10090 GN=Calu PE=1 SV=1	37	4.54818e+06	3.86233e+06	4.99935e+06	4.46034e+07	4.88608e+07	47277955	9.46168e+06	1.13607e+07	1.22436e+07	1.35641e+07	1.6078e+07	1.74988e+07
Q99KK9	Probable histidine--tRNA ligase, mitochondrial OS=Mus musculus OX=10090 GN=Hars2 PE=1 SV=1	56.9							232557	437064	335820	114493		162616
Q9D1Q6	Endoplasmic reticulum resident protein 44 OS=Mus musculus OX=10090 GN=Erp44 PE=1 SV=1	46.8	2.82918e+06	1.84723e+06	1.20934e+06	2.62143e+07	2.3113e+07	1.84641e+07	3.25172e+06	3.25721e+06	3.36302e+06	6.81575e+06	5.34082e+06	4.27611e+06
P0DP27	Calmodulin-2 OS=Mus musculus OX=10090 GN=Calm2 PE=1 SV=1	16.8	1.66389e+07	1.56553e+07	1.91497e+07	267669865	1.48973e+08	1.59489e+08	5.00052e+07	5.10793e+07	5.76916e+07	1.18048e+08	5.77208e+07	6.80412e+07
Q60866	Phosphotriesterase-related protein OS=Mus musculus OX=10090 GN=Pter PE=1 SV=1	39.2			305383	115992	608434	1.07919e+06	450361	222774		187262	348375	151916
Q6P1B1	Xaa-Pro aminopeptidase 1 OS=Mus musculus OX=10090 GN=Xpnpep1 PE=1 SV=1	69.5	1.10727e+07	9.9295e+06	1.01169e+07	4.75767e+07	4.64058e+07	4.21185e+07	2.75511e+07	3.19191e+07	2.74363e+07	1.88276e+07	1.58543e+07	1.66658e+07
Q9QXY6	EH domain-containing protein 3 OS=Mus musculus OX=10090 GN=Ehd3 PE=1 SV=2	60.8							298059	482758	273686	182157	180816
Q9D7A6	Signal recognition particle 19 kDa protein OS=Mus musculus OX=10090 GN=Srp19 PE=1 SV=1	16.2	365043	423285	382850	1.01301e+06	252099	787012	2.41819e+06	2.2221e+06	1.62558e+06	348733	666321	314611
Q99PV0	Pre-mRNA-processing-splicing factor 8 OS=Mus musculus OX=10090 GN=Prpf8 PE=1 SV=2	273.4	1.9739e+07	1.48559e+07	3.77755e+06	1.01254e+07	7.53572e+06	8.32915e+06	5.37367e+07	6.12918e+07	2.15931e+07	6.82887e+06	3.76998e+06	3.89722e+06
Q04692	SWI/SNF-related matrix-associated actin-dependent regulator of chromatin subfamily A containing DEAD/H box 1 OS=Mus musculus OX=10090 GN=Smarcad1 PE=1 SV=2	116.4	2.42615e+06	2.82024e+06	2.83643e+06	1.30664e+06	1.11933e+06	1.21947e+06	2.05403e+07	2.32003e+07	1.68987e+07	1.87948e+06	519122	1.86394e+06
P07901	Heat shock protein HSP 90-alpha OS=Mus musculus OX=10090 GN=Hsp90aa1 PE=1 SV=4	84.7	6.16297e+08	6.38362e+08	6.67423e+08	9.31731e+08	1.09523e+09	7.83122e+08	1.79267e+09	2.15922e+09	2.03911e+09	4.06766e+08	4.22483e+08	3.42722e+08
O55201	Transcription elongation factor SPT5 OS=Mus musculus OX=10090 GN=Supt5h PE=1 SV=1	120.6	1.70101e+06	1.01506e+06	2.27198e+06	1.15941e+06	683345	1.2686e+06	1.10728e+07	1.41399e+07	1.17457e+07	2.06818e+06	426590	1.305e+06
P08752	Guanine nucleotide-binding protein G(i) subunit alpha-2 OS=Mus musculus OX=10090 GN=Gnai2 PE=1 SV=5	40.5	2.58142e+06	6.60335e+06	2.98741e+06	3.44488e+07	2.31174e+07	1.86272e+07	1.7895e+07	1.85889e+07	1.05654e+07	1.93273e+07	1.24975e+07	1.03524e+07
P61089	Ubiquitin-conjugating enzyme E2 N OS=Mus musculus OX=10090 GN=Ube2n PE=1 SV=1	17.1	1.34441e+07	1.06673e+07	1.35051e+07	6.23104e+07	6.2593e+07	5.17713e+07	3.74683e+07	3.75124e+07	3.36633e+07	2.7681e+07	2.27549e+07	1.906e+07
Q9JLI8	Squamous cell carcinoma antigen recognized by T-cells 3 OS=Mus musculus OX=10090 GN=Sart3 PE=1 SV=1	109.6	5.24234e+06	4.43352e+06	6.96779e+06	1.71854e+07	1.65425e+07	1.78561e+07	1.08121e+07	1.06048e+07	1.43451e+07	5.44298e+06	3.88277e+06	5.93287e+06
Q9D8T7	SRA stem-loop-interacting RNA-binding protein, mitochondrial OS=Mus musculus OX=10090 GN=Slirp PE=1 SV=2	12.6	220420	57036.3	435430	63732.3	474944	776402	8.25413e+06	8.4463e+06	7.49211e+06	1.38961e+06	2.26844e+06	1.72939e+06
Q8VH51	RNA-binding protein 39 OS=Mus musculus OX=10090 GN=Rbm39 PE=1 SV=2	59.4	4.61786e+06	3.05564e+06	300165	2.26014e+06	2.93082e+06	2.58843e+06	1.73737e+07	1.6407e+07	4.05187e+06	1.89765e+06	1.60029e+06	3.73897e+06
Q9R1T2	SUMO-activating enzyme subunit 1 OS=Mus musculus OX=10090 GN=Sae1 PE=1 SV=1	38.6	2.1718e+07	2.21985e+07	2.34243e+07	7.03965e+07	5.34069e+07	4.68834e+07	7.29143e+07	7.84707e+07	7.77091e+07	3.33542e+07	2.4021e+07	2.10245e+07
Q9CZX7	Type 2 phosphatidylinositol 4,5-bisphosphate 4-phosphatase OS=Mus musculus OX=10090 GN=Pip4p2 PE=1 SV=1	28							220133	302647	353715	169974		110984
Q9D5V6	Synapse-associated protein 1 OS=Mus musculus OX=10090 GN=Syap1 PE=1 SV=1	41.3	641777	1.58412e+06		1.07463e+06	1.75348e+06	1.69677e+06	654394	2.16512e+06		698306		2.27924e+06
O55131	Septin-7 OS=Mus musculus OX=10090 GN=Sept7 PE=1 SV=1	50.5	9.60492e+06	8.6034e+06	1.04915e+07	6.92444e+07	51208801	6.20438e+07	2.54664e+07	2.69801e+07	3.16678e+07	2.58192e+07	2.01088e+07	2.56961e+07
Q9D8N2	Protein FAM45A OS=Mus musculus OX=10090 GN=Fam45a PE=1 SV=2	40.4							184964	272821	165954	81680.2	89407.2
P63168	Dynein light chain 1, cytoplasmic OS=Mus musculus OX=10090 GN=Dynll1 PE=1 SV=1	10.4	831774	909315	726375	2.59821e+06	3.53338e+06	2670527	3.05161e+06	4.06283e+06	2.70676e+06	1.35338e+06	1.73961e+06	1.53002e+06
Q9CPQ3	Mitochondrial import receptor subunit TOM22 homolog OS=Mus musculus OX=10090 GN=Tomm22 PE=1 SV=3	15.5	2.64392e+06	2.53164e+06	1.63978e+06	1.02053e+06	1.14811e+06	674916	9.56148e+06	9.79739e+06	6.47468e+06	372170	768806	367114
Q91ZJ5	UTP--glucose-1-phosphate uridylyltransferase OS=Mus musculus OX=10090 GN=Ugp2 PE=1 SV=3	56.9	857155	371641	640827	1.09138e+07	9.56038e+06	8.92378e+06	1.25611e+06	2.85889e+06	716929	3.11083e+06	1.74768e+06	5.18974e+06
O89079	Coatomer subunit epsilon OS=Mus musculus OX=10090 GN=Cope PE=1 SV=3	34.5	974250	1.20694e+06	4.1517e+06	1.10601e+07	5.93234e+06	1.14153e+07	5.09645e+06	4.62625e+06	1.12346e+07	3.9373e+06	3.53604e+06	7.00749e+06
P23116	Eukaryotic translation initiation factor 3 subunit A OS=Mus musculus OX=10090 GN=Eif3a PE=1 SV=5	161.8	3.43628e+07	2.64846e+07	2.52443e+07	4.13862e+07	5.2888e+07	4.5613e+07	110010977	1.27058e+08	1.0715e+08	2.19285e+07	2.85395e+07	2.49385e+07
Q61493	DNA polymerase zeta catalytic subunit OS=Mus musculus OX=10090 GN=Rev3l PE=1 SV=3	350.5	333130	290009	282349	1.02752e+06	1.89853e+06	977048
Q68FD5	Clathrin heavy chain 1 OS=Mus musculus OX=10090 GN=Cltc PE=1 SV=3	191.4	8.12565e+07	9.02874e+07	8.4169e+07	5.58765e+08	4.60621e+08	3.86402e+08	2.33823e+08	2.65559e+08	2.23856e+08	2.23028e+08	1.62609e+08	1.46985e+08
Q9CZX8	40S ribosomal protein S19 OS=Mus musculus OX=10090 GN=Rps19 PE=1 SV=3	16.1	3.99021e+07	3.71792e+07	5.42373e+07	5.92124e+07	5.67054e+07	5.98422e+07	9.3172e+07	9.82871e+07	1.21857e+08	1.93447e+07	1.57014e+07	2.181e+07
P42128	Forkhead box protein K1 OS=Mus musculus OX=10090 GN=Foxk1 PE=1 SV=2	74.9	102059			70315.8	155431	169428	61614.5	45487.7			131876
P16858	Glyceraldehyde-3-phosphate dehydrogenase OS=Mus musculus OX=10090 GN=Gapdh PE=1 SV=2	35.8	6.53601e+08	8.92815e+08	7.86231e+08	2.14813e+09	2.98761e+09	2.31357e+09	1.42489e+09	2.14059e+09	1.74271e+09	6.73362e+08	8.43825e+08	7.14585e+08
Q91WD1	DNA-directed RNA polymerase III subunit RPC4 OS=Mus musculus OX=10090 GN=Polr3d PE=2 SV=2	44.3							251633	232466	163417	129350	48646.5
Q9CXW3	Calcyclin-binding protein OS=Mus musculus OX=10090 GN=Cacybp PE=1 SV=1	26.5	1.05736e+07	1.1859e+07	1.52018e+07	1.76232e+07	2.68677e+07	2.39213e+07	4.76879e+07	5.1665e+07	5.93523e+07	1.21381e+07	1.38593e+07	1.21175e+07
Q80YQ2	Mediator of RNA polymerase II transcription subunit 23 OS=Mus musculus OX=10090 GN=Med23 PE=1 SV=2	156	286192	154226	258041	228588	389713	381740	2.39948e+06	2.13678e+06	1.76678e+06	397815	420778	376385
Q99MI1	ELKS/Rab6-interacting/CAST family member 1 OS=Mus musculus OX=10090 GN=Erc1 PE=1 SV=1	128.3	654818	386153	741465	4.43468e+06	5.23e+06	3.9665e+06	2.66765e+06	3.17279e+06	3.43258e+06	4.11493e+06	2.97594e+06	2.71133e+06
Q5DTM8	E3 ubiquitin-protein ligase BRE1A OS=Mus musculus OX=10090 GN=Rnf20 PE=1 SV=2	113.5	201143	69875.9	209408	402272	263692	508165	330682	39450.5	110671	68826.6	8620.51	103312
Q8R127	Saccharopine dehydrogenase-like oxidoreductase OS=Mus musculus OX=10090 GN=Sccpdh PE=1 SV=1	47.1		932415	89049.3	6.92445e+06	6.05277e+06	4.45943e+06	316506		305351	1.0188e+06	1.00308e+06	857388
Q8R409	Protein HEXIM1 OS=Mus musculus OX=10090 GN=Hexim1 PE=1 SV=1	40.2	98550.2	175649	271404	148443	20446.7	211257	2.09406e+06	2.28559e+06	2.00863e+06	376884	57208.3	140677
Q91V12	Cytosolic acyl coenzyme A thioester hydrolase OS=Mus musculus OX=10090 GN=Acot7 PE=1 SV=2	42.5	6.6706e+06	7.21173e+06	6.12827e+06	2.98061e+07	1.8924e+07	1.81937e+07	2.00831e+07	2.0266e+07	2.04333e+07	1.39765e+07	6.29629e+06	7.59195e+06
P62843	40S ribosomal protein S15 OS=Mus musculus OX=10090 GN=Rps15 PE=1 SV=2	17	5.39772e+07	5.04371e+07	4.30625e+07	3.70061e+07	6.4194e+07	4.05384e+07	1.06004e+08	1.13962e+08	8.41993e+07	9.06745e+06	1.86649e+07	1.13808e+07
P39054	Dynamin-2 OS=Mus musculus OX=10090 GN=Dnm2 PE=1 SV=2	98.1	1.54926e+06	1.36927e+06	3.01588e+06	1.6642e+07	1.59015e+07	1.10924e+07	1.08075e+07	1.15899e+07	1.423e+07	1.59134e+07	7.81065e+06	1.5159e+07
Q9D1G1	Ras-related protein Rab-1B OS=Mus musculus OX=10090 GN=Rab1b PE=1 SV=1	22.2	3.52216e+06	2.99827e+06	3.31553e+06	1.10542e+07	1.06541e+07	7.57231e+06	1.1524e+07	1.08777e+07	1.25748e+07	5.65979e+06	3.84717e+06	4.23636e+06
Q9JMA1	Ubiquitin carboxyl-terminal hydrolase 14 OS=Mus musculus OX=10090 GN=Usp14 PE=1 SV=3	56	9.61916e+06	1.08182e+07	1.05427e+07	2.43601e+07	2.44035e+07	2.16276e+07	3.32643e+07	4.08358e+07	3.1633e+07	1.30892e+07	1.0397e+07	8.48812e+06
Q8BTS4	Nuclear pore complex protein Nup54 OS=Mus musculus OX=10090 GN=Nup54 PE=1 SV=1	55.7	469012	341319	72307.5	370325	488090	584934	5.45288e+06	5.75741e+06	2.22121e+06	1402961	1.11788e+06	930816
Q78JW9	Ubiquitin domain-containing protein UBFD1 OS=Mus musculus OX=10090 GN=Ubfd1 PE=1 SV=2	40.1	1.12936e+06	1.35444e+06	1.32224e+06	4.72229e+06	5.00097e+06	3.88532e+06	4.46118e+06	5.68353e+06	5.80719e+06	2.72014e+06	2.50734e+06	2.24344e+06
Q8BIW1	Exopolyphosphatase PRUNE1 OS=Mus musculus OX=10090 GN=Prune1 PE=1 SV=1	50.2	2.65077e+06	5.12966e+06	5.18416e+06	9.11704e+06	7.96613e+06	5.89441e+06	1.6901e+07	2.46772e+07	1.87929e+07	7.24572e+06	3.14702e+06	4.78143e+06
Q9CZD3	Glycine--tRNA ligase OS=Mus musculus OX=10090 GN=Gars PE=1 SV=1	81.8	2.09375e+07	1.88315e+07	2.29405e+07	4.87224e+07	6.09145e+07	4.49971e+07	6.22601e+07	6.54526e+07	6.87332e+07	2.55525e+07	2.1785e+07	1.69903e+07
P70452	Syntaxin-4 OS=Mus musculus OX=10090 GN=Stx4 PE=1 SV=1	34.1							49676.2	108634	47533.8
P19096	Fatty acid synthase OS=Mus musculus OX=10090 GN=Fasn PE=1 SV=2	272.3	4.97441e+07	4.23328e+07	5.93357e+07	2.02564e+08	2.45537e+08	2.22202e+08	1.89571e+08	2.07629e+08	2.06792e+08	1.11793e+08	1.19989e+08	1.22484e+08
Q61768	Kinesin-1 heavy chain OS=Mus musculus OX=10090 GN=Kif5b PE=1 SV=3	109.5	3.40514e+06	3.41498e+06	6.32791e+06	4.07492e+07	3.93376e+07	3.50921e+07	1.63429e+07	1.85677e+07	2.45123e+07	3.38852e+07	1.77407e+07	2.15784e+07
Q8VDK1	Deaminated glutathione amidase OS=Mus musculus OX=10090 GN=Nit1 PE=1 SV=2	35.7	298031	533882	290452	6.96718e+06	5.5995e+06	5.70786e+06	1.41986e+06	1.06808e+06	1.38232e+06	4.34059e+06	5.07162e+06	1.04437e+06
P50516	V-type proton ATPase catalytic subunit A OS=Mus musculus OX=10090 GN=Atp6v1a PE=1 SV=2	68.3	1.05827e+07	1.01675e+07	1.09866e+07	1.10762e+08	8.39007e+07	6.81469e+07	3.04642e+07	3.46831e+07	3.00389e+07	4.86516e+07	2.85967e+07	2.77454e+07
Q9CR41	Huntingtin-interacting protein K OS=Mus musculus OX=10090 GN=Hypk PE=1 SV=2	14.7	496293	713371	105345	2.01225e+06	4.23686e+06	876402	3.04428e+06	4.31496e+06	3.37386e+06	3322392	1.79736e+06	3364052
Q8K0T0	Reticulon-1 OS=Mus musculus OX=10090 GN=Rtn1 PE=1 SV=1	83.5	861462	557927	877078	3.80828e+07	2.43349e+07	1.64225e+07	3.15957e+06	5.02543e+06	2.77789e+06	2.56564e+07	1.19458e+07	1.17151e+07
Q9ERE7	LRP chaperone MESD OS=Mus musculus OX=10090 GN=Mesd PE=1 SV=1	25.2	1.9342e+06	1.45354e+06	2.39819e+06	8.47099e+06	8292479	9.97935e+06	2824939	3.35024e+06	4.11512e+06	1.85597e+06	1.85992e+06	2.64448e+06
Q99020	Heterogeneous nuclear ribonucleoprotein A/B OS=Mus musculus OX=10090 GN=Hnrnpab PE=1 SV=1	30.8	2.33834e+07	2.36852e+07	1.97698e+07	4.9236e+07	5.30926e+07	4.85084e+07	6.23222e+07	6.4528e+07	4.65825e+07	1.68253e+07	1.70123e+07	1.70716e+07
Q11136	Xaa-Pro dipeptidase OS=Mus musculus OX=10090 GN=Pepd PE=1 SV=3	55	719852	784042	1.07269e+06	4.33746e+06	3.41534e+06	3.12775e+06	4.0431e+06	3.73417e+06	4.34783e+06	2.2838e+06	2.24383e+06	2.181e+06
Q7TMK9	Heterogeneous nuclear ribonucleoprotein Q OS=Mus musculus OX=10090 GN=Syncrip PE=1 SV=2	69.6	2.05011e+07	2.07071e+07	1.88527e+07	3.08005e+07	3.87343e+07	3.62984e+07	60969721	7.31038e+07	4.38058e+07	1.09936e+07	1.44087e+07	1.48341e+07
Q9CRA8	Exosome complex component RRP46 OS=Mus musculus OX=10090 GN=Exosc5 PE=1 SV=1	25.2	1.17335e+06	693443	337922		475221	437410	2.86242e+06	4.17529e+06	1.89995e+06	223209	255408
Q8C1B7	Septin-11 OS=Mus musculus OX=10090 GN=Sept11 PE=1 SV=4	49.7	5.32121e+06	5.57098e+06	6.74577e+06	4.25974e+07	2.99575e+07	3.69388e+07	1.36058e+07	3.29051e+07	1.78679e+07	2.44481e+07	1.21033e+07	1.4122e+07
O55022	Membrane-associated progesterone receptor component 1 OS=Mus musculus OX=10090 GN=Pgrmc1 PE=1 SV=4	21.7	1.73438e+06	1.58751e+06	1.9148e+06	2.47706e+07	2.12005e+07	2.01738e+07	7.24163e+06	9.01097e+06	8.60086e+06	1.76723e+07	1.10958e+07	12721791
O35166	Golgi SNAP receptor complex member 2 OS=Mus musculus OX=10090 GN=Gosr2 PE=1 SV=2	24.7	207948		458765	1.38948e+06	1.59852e+06	1.44581e+06	1.07973e+06	407107	1.32035e+06	1.48845e+06	2.05154e+06	1.26943e+06
P80316	T-complex protein 1 subunit epsilon OS=Mus musculus OX=10090 GN=Cct5 PE=1 SV=1	59.6	6.23461e+07	6.23545e+07	7.28399e+07	1.65754e+08	1.7631e+08	1.48391e+08	181424751	1.94775e+08	1.91013e+08	5.73261e+07	7.31305e+07	5.4193e+07
Q9JIX8	Apoptotic chromatin condensation inducer in the nucleus OS=Mus musculus OX=10090 GN=Acin1 PE=1 SV=3	150.6	1.60509e+06	1.08437e+06	1.28378e+06	1.43165e+06	1.79114e+06	1.32907e+06	4.40277e+06	5.16961e+06	704684	382383	429267	327176
Q6ZWZ2	Ubiquitin-conjugating enzyme E2 R2 OS=Mus musculus OX=10090 GN=Ube2r2 PE=1 SV=1	27.1	1.5778e+06	1.2281e+06	35088.9	2.74999e+06	3.12803e+06	2.05256e+06	3.65661e+06	2.86881e+06	6.07601e+06	3.02595e+06	3.98309e+06	3.01319e+06
Q6P5C5	Single-strand selective monofunctional uracil DNA glycosylase OS=Mus musculus OX=10090 GN=Smug1 PE=1 SV=1	30.6	87532.4	90406.5	84250.3	835446	113572	712560
Q8C6G8	WD repeat-containing protein 26 OS=Mus musculus OX=10090 GN=Wdr26 PE=1 SV=3	70.5	52471.6	159113		32054.9	363699	441324			122452			44413.1
Q8VHX6	Filamin-C OS=Mus musculus OX=10090 GN=Flnc PE=1 SV=3	290.9	590302	938440	514678	1.74575e+07	1.62839e+07	1.94036e+07	1.68824e+06	1.53019e+06	1.48681e+06	5.28252e+06	5.01634e+06	6.12999e+06
P56395	Cytochrome b5 OS=Mus musculus OX=10090 GN=Cyb5a PE=1 SV=2	15.2	1.81629e+06	1.98998e+06	2.17742e+06	4.34604e+06	2.74131e+06	3.92877e+06	6.62887e+06	7.08082e+06	6.90978e+06	1.3771e+06	1.60195e+06	1.90244e+06
Q9CY97	RNA polymerase II subunit A C-terminal domain phosphatase SSU72 OS=Mus musculus OX=10090 GN=Ssu72 PE=1 SV=1	22.5	29969.7	968273	47426.8	60050.7	287928	433171	3.09324e+06	3.45553e+06	4.01791e+06	979980	622441	832671
Q9EQQ9	Protein O-GlcNAcase OS=Mus musculus OX=10090 GN=Oga PE=1 SV=2	103.1	2.30334e+06	2.6675e+06	2.52602e+06	3.59117e+07	2.11904e+07	2.41148e+07	1.32477e+07	1.72982e+07	1.56411e+07	2.91548e+07	1.8108e+07	1.7421e+07
Q9CQR6	Serine/threonine-protein phosphatase 6 catalytic subunit OS=Mus musculus OX=10090 GN=Ppp6c PE=1 SV=1	35.1	2.14812e+06	3.09079e+06	3.17993e+06	8.3564e+06	1.00308e+07	8.29028e+06	1.33513e+07	1.15207e+07	1.23565e+07	4.13375e+06	5.50236e+06	5.9532e+06
Q9DCJ9	N-acetylneuraminate lyase OS=Mus musculus OX=10090 GN=Npl PE=1 SV=1	35.1	116487	6.52017e+06	424663	1.88539e+06	1.54057e+06	1.30925e+06	803058	1.17518e+06	1.14875e+06	348723	274556	288381
P02468	Laminin subunit gamma-1 OS=Mus musculus OX=10090 GN=Lamc1 PE=1 SV=2	177.2		102963	249896		737994		8.01883e+06	1.17351e+07	9.02514e+06	378123	1.03107e+06	2.69306e+06
P54276	DNA mismatch repair protein Msh6 OS=Mus musculus OX=10090 GN=Msh6 PE=1 SV=3	151	2.36043e+07	2.52202e+07	2.9996e+07	9.42393e+06	1.14488e+07	1.00407e+07	1.08658e+08	1.37109e+08	1.27087e+08	5.02569e+06	5.46129e+06	9.01169e+06
P97363	Serine palmitoyltransferase 2 OS=Mus musculus OX=10090 GN=Sptlc2 PE=1 SV=2	62.9							2.50743e+06	2.4979e+06	3.30613e+06	409782	356363	879824
Q6DIC0	Probable global transcription activator SNF2L2 OS=Mus musculus OX=10090 GN=Smarca2 PE=1 SV=1	180.1							101437	125361
Q8R146	Acylamino-acid-releasing enzyme OS=Mus musculus OX=10090 GN=Apeh PE=1 SV=3	81.5	2.32215e+06	1.58535e+06	736258	1.30129e+07	1.30758e+07	8.37936e+06	1.82653e+06	2.56464e+06	2.54861e+06	2.40979e+06	2.33044e+06	2.40091e+06
Q9CQF3	Cleavage and polyadenylation specificity factor subunit 5 OS=Mus musculus OX=10090 GN=Nudt21 PE=1 SV=1	26.2	5.09211e+06	5.58685e+06	2.34849e+06	4.38493e+06	8.38955e+06	3.85487e+06	2.02246e+07	2.50804e+07	7.73934e+06	3.39771e+06	1.49924e+06	3.5114e+06
Q9D1D4	Transmembrane emp24 domain-containing protein 10 OS=Mus musculus OX=10090 GN=Tmed10 PE=1 SV=1	24.9	2.59852e+06	7.43369e+06	3.64162e+06	1.96037e+07	1.51999e+07	1.21545e+07	7.97569e+06	1.00037e+07	7.83693e+06	3.57012e+06	4.21917e+06	4.5828e+06
Q99LC5	Electron transfer flavoprotein subunit alpha, mitochondrial OS=Mus musculus OX=10090 GN=Etfa PE=1 SV=2	35	1.23377e+07	1.01724e+07	1.34282e+07	2.92479e+07	3.9942e+07	3.08174e+07	2.55302e+07	2.54178e+07	3.26011e+07	9.14923e+06	1.09706e+07	9.65051e+06
Q7M6Y3	Phosphatidylinositol-binding clathrin assembly protein OS=Mus musculus OX=10090 GN=Picalm PE=1 SV=1	71.5	3.28039e+06	2.31371e+06	1.86903e+06	1.74841e+07	1.11719e+07	9.56094e+06	1.31376e+07	1.40142e+07	1.17672e+07	1.28478e+07	5.7459e+06	8.27311e+06
P68372	Tubulin beta-4B chain OS=Mus musculus OX=10090 GN=Tubb4b PE=1 SV=1	49.8	3.51697e+08	3.9931e+08	5.36638e+08	6.03561e+09	3.63284e+09	4.18128e+09	9.67732e+08	1.26455e+09	1.4196e+09	2.22014e+09	1.29163e+09	1.57805e+09
P35922	Synaptic functional regulator FMR1 OS=Mus musculus OX=10090 GN=Fmr1 PE=1 SV=1	68.9	631042	553350	1.30185e+06	1.5344e+06	2.1449e+06	1.41012e+06	2.8579e+06	3.51622e+06	2.65568e+06	870901	856917	779901
Q8VI75	Importin-4 OS=Mus musculus OX=10090 GN=Ipo4 PE=1 SV=1	119.2	7.84399e+06	6.39276e+06	6.64523e+06	7.40165e+06	1.42576e+07	8.96302e+06	3.18827e+07	3.69444e+07	3.18922e+07	4.7229e+06	9.03563e+06	5.33389e+06
Q62523	Zyxin OS=Mus musculus OX=10090 GN=Zyx PE=1 SV=2	60.5	22257.6			1.33396e+06	1.5061e+06	2.61515e+06	38704.7		83534.3	876219	357433	1.21349e+06
P12658	Calbindin OS=Mus musculus OX=10090 GN=Calb1 PE=1 SV=2	30			183773	1.91846e+06	1.40299e+06	1.12728e+06				801597		226645
Q61074	Protein phosphatase 1G OS=Mus musculus OX=10090 GN=Ppm1g PE=1 SV=3	58.7	5.73092e+06	4.74641e+06	5.40913e+06	1.48441e+07	1.41189e+07	9.22349e+06	2.09727e+07	2.27834e+07	1.74016e+07	8.42113e+06	5.67092e+06	4.86661e+06
P61957	Small ubiquitin-related modifier 2 OS=Mus musculus OX=10090 GN=Sumo2 PE=1 SV=1	10.9	1.61385e+06	1.14044e+06	1.44648e+06	7.45869e+06	5.96892e+06	8.21748e+06	6.78161e+06	5.72849e+06	5826632	4.70785e+06	3.10955e+06	4.48609e+06
Q922B2	Aspartate--tRNA ligase, cytoplasmic OS=Mus musculus OX=10090 GN=Dars PE=1 SV=2	57.1	1.58205e+07	1.61067e+07	1.98025e+07	4.59838e+07	6.21477e+07	4.72689e+07	4.22514e+07	4.8982e+07	5.24491e+07	1.48735e+07	2.05257e+07	1.98173e+07
Q9DBZ5	Eukaryotic translation initiation factor 3 subunit K OS=Mus musculus OX=10090 GN=Eif3k PE=1 SV=1	25.1	4.2843e+06	4.61063e+06	4.03664e+06	8.83476e+06	1.24211e+07	9.05054e+06	1.57673e+07	2.10116e+07	2.1203e+07	5.86154e+06	8.96309e+06	3.45841e+06
Q9D0M5	Dynein light chain 2, cytoplasmic OS=Mus musculus OX=10090 GN=Dynll2 PE=1 SV=1	10.3	2.80608e+06	2.54145e+06	2.79472e+06	3.7256e+07	2.04422e+07	2.27407e+07	9715874	1.12911e+07	9.77715e+06	1.85949e+07	9.39421e+06	1.10774e+07
Q8R0G7	Protein spinster homolog 1 OS=Mus musculus OX=10090 GN=Spns1 PE=2 SV=1	56.7							551952	635826		346576
Q62158	Zinc finger protein RFP OS=Mus musculus OX=10090 GN=Trim27 PE=1 SV=2	58.5							103497	199511
Q9EQ28	DNA polymerase delta subunit 3 OS=Mus musculus OX=10090 GN=Pold3 PE=1 SV=2	50.8	66233.7		71733			104457	2.58871e+06	2.7549e+06	4.92066e+06	169898	201712	1.04609e+06
O70456	14-3-3 protein sigma OS=Mus musculus OX=10090 GN=Sfn PE=1 SV=2	27.7	10332710	8.85985e+06	9.8234e+06	1.58536e+06	775314	559352	2.25851e+07	2.11021e+07	19067922	70411.6	1.12458e+06	181871
P17182	Alpha-enolase OS=Mus musculus OX=10090 GN=Eno1 PE=1 SV=3	47.1	4.94033e+08	4.99476e+08	5.82261e+08	2.06178e+09	2.42867e+09	2.04957e+09	1.05478e+09	1.15776e+09	1.15885e+09	6.02817e+08	6.18061e+08	5.6106e+08
P62717	60S ribosomal protein L18a OS=Mus musculus OX=10090 GN=Rpl18a PE=1 SV=1	20.7	1.17395e+07	9.47422e+06	1.38444e+07	1.39877e+07	1.50448e+07	1.97588e+07	4.0918e+07	4.58077e+07	4.49087e+07	5.68839e+06	5.97348e+06	1.3812e+07
Q9DCN2	NADH-cytochrome b5 reductase 3 OS=Mus musculus OX=10090 GN=Cyb5r3 PE=1 SV=3	34.1	1.44737e+07	1.78821e+07	1.80873e+07	4.12907e+07	3.56485e+07	2.9662e+07	3.75989e+07	4.58476e+07	4.23511e+07	1.47338e+07	9.90469e+06	9.62651e+06
P61087	Ubiquitin-conjugating enzyme E2 K OS=Mus musculus OX=10090 GN=Ube2k PE=1 SV=3	22.4	5.09489e+06	5.34493e+06	8.76829e+06	2.26678e+07	2.41795e+07	2.42947e+07	1.63082e+07	1.8628e+07	1.1191e+07	9981512	6.67854e+06	5.86187e+06
P08113	Endoplasmin OS=Mus musculus OX=10090 GN=Hsp90b1 PE=1 SV=2	92.4	5.12672e+07	4.61871e+07	5.66024e+07	3.10009e+08	2.98643e+08	2.65789e+08	1.16668e+08	1.25982e+08	1.3327e+08	9.13854e+07	8.80997e+07	9.20337e+07
P14148	60S ribosomal protein L7 OS=Mus musculus OX=10090 GN=Rpl7 PE=1 SV=2	31.4	1.22283e+08	9.45501e+07	1.10457e+08	8.82759e+07	1.2446e+08	1.01688e+08	2.7965e+08	2.39792e+08	2.44311e+08	2.52321e+07	3.44202e+07	3.39843e+07
P56480	ATP synthase subunit beta, mitochondrial OS=Mus musculus OX=10090 GN=Atp5f1b PE=1 SV=2	56.3	1.6161e+08	1.62597e+08	1.75005e+08	2.6098e+08	2.24097e+08	1.97812e+08	4.1119e+08	4.63672e+08	4.58504e+08	8.94412e+07	7.35557e+07	6.86746e+07
Q5SV85	Synergin gamma OS=Mus musculus OX=10090 GN=Synrg PE=1 SV=1	139.5	98946.9	194904		236874	153838	523390
Q9D187	Cytosolic iron-sulfur assembly component 2B OS=Mus musculus OX=10090 GN=Ciao2b PE=1 SV=1	17.7	37932.5	30580	113146	114627	106814		1.26836e+06	1.16449e+06	1.62509e+06	159222	203140	182793
Q60864	Stress-induced-phosphoprotein 1 OS=Mus musculus OX=10090 GN=Stip1 PE=1 SV=1	62.5	7.0999e+07	6.86978e+07	9.64943e+07	1.80513e+08	1.78771e+08	1.68388e+08	1.90419e+08	1.94748e+08	2.42753e+08	6.5816e+07	5.43295e+07	5.93744e+07
Q9CYN9	Renin receptor OS=Mus musculus OX=10090 GN=Atp6ap2 PE=1 SV=2	39.1							1.68355e+06	1.56506e+06	1.07693e+06	1.56438e+06	135811	86969.3
Q8BTM8	Filamin-A OS=Mus musculus OX=10090 GN=Flna PE=1 SV=5	281	3.22497e+07	3.24395e+07	3.21452e+07	1.07174e+08	1.43451e+08	1.49354e+08	8.76465e+07	1.08351e+08	9.80733e+07	3.9958e+07	5.12948e+07	6.32023e+07
Q8N7N5	DDB1- and CUL4-associated factor 8 OS=Mus musculus OX=10090 GN=Dcaf8 PE=1 SV=1	66					128481	119991	600757	340004	1.04512e+06	182238	476072	1.07889e+06
P61759	Prefoldin subunit 3 OS=Mus musculus OX=10090 GN=Vbp1 PE=1 SV=2	22.4	8.10824e+06	8.34816e+06	7.77643e+06	3.13386e+07	3.00249e+07	2.14234e+07	2.18071e+07	2.43455e+07	2.29413e+07	1.11034e+07	9.57339e+06	8.91828e+06
P70670	Nascent polypeptide-associated complex subunit alpha, muscle-specific form OS=Mus musculus OX=10090 GN=Naca PE=1 SV=2	220.4	1.88156e+07	1.31324e+07	1.92451e+07	3.8435e+07	2.99252e+07	3.3846e+07	6.58474e+07	6.26184e+07	6.41197e+07	1.72455e+07	1.43955e+07	1.7702e+07
E9Q6J5	Biorientation of chromosomes in cell division protein 1-like 1 OS=Mus musculus OX=10090 GN=Bod1l PE=1 SV=1	327.3	99263.5		77041	333567	76604.5	299094	466873	510165	579163	418901	163182	353279
Q3TC46	Protein PAT1 homolog 1 OS=Mus musculus OX=10090 GN=Patl1 PE=1 SV=2	86.7							64941.5	62888	83191
Q920A7	AFG3-like protein 1 OS=Mus musculus OX=10090 GN=Afg3l1 PE=1 SV=2	87	449802	308421	262312	168445			1.67812e+06	1.60644e+06	1.36059e+06			47297.3
Q91V14	Solute carrier family 12 member 5 OS=Mus musculus OX=10090 GN=Slc12a5 PE=1 SV=2	126.2				239378	41612.7
Q8BGQ7	Alanine--tRNA ligase, cytoplasmic OS=Mus musculus OX=10090 GN=Aars PE=1 SV=1	106.8	3.67206e+07	3.24246e+07	3.75242e+07	8.74094e+07	8.62285e+07	6.11352e+07	1.07037e+08	1.12775e+08	1.26854e+08	3.65243e+07	3.21511e+07	2.70936e+07
Q6PGC1	ATP-dependent RNA helicase DHX29 OS=Mus musculus OX=10090 GN=Dhx29 PE=1 SV=1	153.9	1.82408e+06	1.49628e+06	2.6244e+06	3.25784e+06	2.76536e+06	2.86693e+06	6.28849e+06	6.4639e+06	6.18838e+06	1.92693e+06	1.14241e+06	828599
P56135	ATP synthase subunit f, mitochondrial OS=Mus musculus OX=10090 GN=Atp5mf PE=1 SV=3	10.3	4166303	2.84903e+06	2.96847e+06	6958502	3.31896e+06	3.09201e+06	8703823	8221049	7051507	1508768	1.11466e+06	1.22254e+06
O35737	Heterogeneous nuclear ribonucleoprotein H OS=Mus musculus OX=10090 GN=Hnrnph1 PE=1 SV=3	49.2	3.51431e+06	3.71592e+06	1.67791e+06	2.18515e+07	1.41677e+07	1.78132e+07	8.60718e+06	8.97336e+06	4.4665e+06	6.00148e+06	4.28993e+06	6.76644e+06
Q8VEK3	Heterogeneous nuclear ribonucleoprotein U OS=Mus musculus OX=10090 GN=Hnrnpu PE=1 SV=1	87.9	3.74827e+07	3.41592e+07	3.16362e+07	5.33903e+07	5.67959e+07	6.09837e+07	7.40777e+07	7.5743e+07	6.76007e+07	1.26739e+07	1.52876e+07	1.78849e+07
P40201	Chromodomain-helicase-DNA-binding protein 1 OS=Mus musculus OX=10090 GN=Chd1 PE=1 SV=3	196.3							128262	130971
Q8R1K1	Ubiquitin-associated domain-containing protein 2 OS=Mus musculus OX=10090 GN=Ubac2 PE=1 SV=1	39	234105	209860	273773	387642	321369	220994	3.37591e+06	3.50218e+06	3.03774e+06	422889	352085	987169
Q8BG32	26S proteasome non-ATPase regulatory subunit 11 OS=Mus musculus OX=10090 GN=Psmd11 PE=1 SV=3	47.4	1.66645e+07	1.60857e+07	21817610	5.39447e+07	5.05339e+07	5.29154e+07	4.76615e+07	5.28234e+07	5.8864e+07	1.91754e+07	1.96904e+07	1.93045e+07
P17427	AP-2 complex subunit alpha-2 OS=Mus musculus OX=10090 GN=Ap2a2 PE=1 SV=2	104	4.99173e+06	4.03766e+06	4.82577e+06	3.60505e+07	3.0295e+07	3.10183e+07	1.49304e+07	1.87033e+07	1.45805e+07	1.54923e+07	1.29374e+07	1.40955e+07
P12970	60S ribosomal protein L7a OS=Mus musculus OX=10090 GN=Rpl7a PE=1 SV=2	30	7.80215e+07	8.40524e+07	9.89903e+07	7.25324e+07	1.12569e+08	8.87149e+07	1.83508e+08	2.24001e+08	2.27875e+08	2.19487e+07	3.3181e+07	2.85521e+07
P63001	Ras-related C3 botulinum toxin substrate 1 OS=Mus musculus OX=10090 GN=Rac1 PE=1 SV=1	21.4	5.16729e+06	3.84036e+06	5.24271e+06	5.57628e+07	4.9603e+07	3.51572e+07	1.47632e+07	1.13777e+07	1.40768e+07	1.93935e+07	1.74232e+07	1.2997e+07
Q9R190	Metastasis-associated protein MTA2 OS=Mus musculus OX=10090 GN=Mta2 PE=1 SV=1	75	2.61913e+06	2.25775e+06	818422	2.58209e+06	3.36825e+06	3.08723e+06	1.02134e+07	1.3967e+07	3.90066e+06	2.75684e+06	1.40409e+06	1.58384e+06
Q9CQZ1	Heat shock factor-binding protein 1 OS=Mus musculus OX=10090 GN=Hsbp1 PE=1 SV=1	8.6	860343	835415	425280	5.80799e+06	3.28235e+06	1.90084e+07	5.60868e+06	5.03177e+06	5.02659e+06	9.17537e+06	5.65498e+06	6.43447e+06
Q9CPT3	N-acylneuraminate-9-phosphatase OS=Mus musculus OX=10090 GN=Nanp PE=1 SV=1	27.8			99362.5	351340	277505	434226	395362	793227	448736	2.76638e+06	1.73637e+06	194305
Q6PER3	Microtubule-associated protein RP/EB family member 3 OS=Mus musculus OX=10090 GN=Mapre3 PE=1 SV=1	31.9	497695			1.0118e+07	5.96502e+06	2.98631e+06	634094		159733	5.07095e+06	1515370	2.16095e+06
Q9D2M8	Ubiquitin-conjugating enzyme E2 variant 2 OS=Mus musculus OX=10090 GN=Ube2v2 PE=1 SV=4	16.4	4.47751e+06	3.7476e+06	5.99638e+06	2.87438e+07	2.10047e+07	2.0193e+07	1.40951e+07	1.31425e+07	1.43766e+07	1.15362e+07	6.82206e+06	8.10839e+06
Q9Z2I9	Succinate--CoA ligase [ADP-forming] subunit beta, mitochondrial OS=Mus musculus OX=10090 GN=Sucla2 PE=1 SV=2	50.1	3.43172e+06	4.03758e+06	3.66294e+06	2.34463e+07	1.72937e+07	1.63314e+07	1.35182e+07	1.49336e+07	1.42319e+07	1.13486e+07	7.04736e+06	9.24488e+06
Q78ZA7	Nucleosome assembly protein 1-like 4 OS=Mus musculus OX=10090 GN=Nap1l4 PE=1 SV=1	42.7	6.09844e+06	6.0745e+06	6.44059e+06	3.89951e+07	4.08801e+07	3.16239e+07	1.87619e+07	2.18646e+07	2.22882e+07	1.49632e+07	1.64817e+07	15397095
P42125	Enoyl-CoA delta isomerase 1, mitochondrial OS=Mus musculus OX=10090 GN=Eci1 PE=1 SV=2	32.2	5.05111e+06	5.41331e+06	1.18802e+07	2.17356e+07	2.72587e+07	1.99227e+07	9.11515e+06	9.07776e+06	1.00401e+07	4.15162e+06	4.87028e+06	2.93146e+06
D3Z7P3	Glutaminase kidney isoform, mitochondrial OS=Mus musculus OX=10090 GN=Gls PE=1 SV=1	73.9	588936	637404	675200	4.23665e+06	2.51145e+06	2.15992e+06	4.19601e+06	4.90195e+06	3.96243e+06	2.94187e+06	2.03742e+06	2.42002e+06
Q91Z31	Polypyrimidine tract-binding protein 2 OS=Mus musculus OX=10090 GN=Ptbp2 PE=1 SV=2	57.5	453746	2.7884e+06	2.37928e+06	4.05666e+07	3.46231e+07	2.35584e+07	3.37072e+06	3.80485e+06	4.679e+06	1.54783e+07	8.65928e+06	9.64539e+06
P29341	Polyadenylate-binding protein 1 OS=Mus musculus OX=10090 GN=Pabpc1 PE=1 SV=2	70.6	6.80213e+07	7.14083e+07	7.64602e+07	1.18927e+08	1.06456e+08	1.04884e+08	1.66967e+08	2.0106e+08	1.76529e+08	3.10399e+07	3.4755e+07	3.84864e+07
P26040	Ezrin OS=Mus musculus OX=10090 GN=Ezr PE=1 SV=3	69.4	1.70279e+07	1.50228e+07	1.66078e+07	4.61966e+07	1.14405e+08	9.87061e+07	5.01683e+07	5.35842e+07	4.93648e+07	1.87957e+07	4.10384e+07	4.13403e+07
Q9R0P3	S-formylglutathione hydrolase OS=Mus musculus OX=10090 GN=Esd PE=1 SV=1	31.3	6.94626e+06	6.22274e+06	6.29881e+06	4.51456e+07	4.49598e+07	3.72265e+07	1.38712e+07	1.28435e+07	1.09889e+07	1.02969e+07	9.58294e+06	1.07344e+07
Q9D1M4	Eukaryotic translation elongation factor 1 epsilon-1 OS=Mus musculus OX=10090 GN=Eef1e1 PE=1 SV=1	19.8	4.2554e+06	3.21434e+06	5.57724e+06	6.67693e+06	2.95992e+06	6.91217e+06	1.47651e+07	1.16182e+07	1.50274e+07	2.59316e+06	1.27378e+06	2.72304e+06
O88522	NF-kappa-B essential modulator OS=Mus musculus OX=10090 GN=Ikbkg PE=1 SV=2	47.9							183708	131179	188548			134743
Q99LI8	Hepatocyte growth factor-regulated tyrosine kinase substrate OS=Mus musculus OX=10090 GN=Hgs PE=1 SV=2	86	1.35172e+06	674368	1.14687e+06	6.7013e+06	3.14814e+06	6.70892e+06	4.49306e+06	4.54437e+06	3.77925e+06	4.30138e+06	1.67885e+06	2.8121e+06
O70591	Prefoldin subunit 2 OS=Mus musculus OX=10090 GN=Pfdn2 PE=1 SV=2	16.5	3.6889e+06	3.77908e+06	4.25425e+06	1.44142e+07	1.32268e+07	1.1489e+07	1.39815e+07	1.92636e+07	1.59289e+07	7.45896e+06	6.56751e+06	6.28351e+06
Q99L47	Hsc70-interacting protein OS=Mus musculus OX=10090 GN=St13 PE=1 SV=1	41.6	1.04962e+07	1.14099e+07	1.73256e+07	3.98676e+07	6.10588e+07	4.68353e+07	3.54262e+07	4.46173e+07	3.99168e+07	1.66511e+07	2.10566e+07	1.91841e+07
Q60631	Growth factor receptor-bound protein 2 OS=Mus musculus OX=10090 GN=Grb2 PE=1 SV=1	25.2	737343	341992	783254	6.62493e+06	5.1811e+06	4.51292e+06	6.00917e+06	7.28533e+06	6.57188e+06	1.09308e+07	6.48162e+06	6.16943e+06
P53994	Ras-related protein Rab-2A OS=Mus musculus OX=10090 GN=Rab2a PE=1 SV=1	23.5	1.64363e+06	1.47754e+06	2.18812e+06	4.07093e+07	3.19553e+07	2.28012e+07	5.93525e+06	6.97363e+06	7.17069e+06	1.85518e+07	1.33506e+07	1.29087e+07
Q3UGR5	Haloacid dehalogenase-like hydrolase domain-containing protein 2 OS=Mus musculus OX=10090 GN=Hdhd2 PE=1 SV=2	28.7	99786.9	1.11792e+06	635317	6.8786e+06	5.7226e+06	6721817	737156	865019	971643	1.73949e+06	1.31805e+06	1.9426e+06
P13439	Uridine 5'-monophosphate synthase OS=Mus musculus OX=10090 GN=Umps PE=1 SV=3	52.3	1.59366e+07	1.95709e+07	2.24577e+07	8.32083e+06	7.28373e+06	1.14323e+07	5.79758e+07	6.89892e+07	5.9073e+07	3.07717e+06	3.9405e+06	3.71072e+06
E9PVA8	eIF-2-alpha kinase activator GCN1 OS=Mus musculus OX=10090 GN=Gcn1 PE=1 SV=1	292.8	1.45877e+07	1.32012e+07	1.94677e+07	4.19185e+07	5.20858e+07	4.20983e+07	5.44521e+07	6.64038e+07	6.02734e+07	2.30962e+07	2.26991e+07	1.95366e+07
Q61655	ATP-dependent RNA helicase DDX19A OS=Mus musculus OX=10090 GN=Ddx19a PE=1 SV=2	53.9	2.56383e+06	1.55782e+06	2.47761e+06	7.83162e+06	1.13759e+07	1.02803e+07	9.17144e+06	9.92601e+06	1.01071e+07	4.81967e+06	5.22578e+06	6.47823e+06
P68368	Tubulin alpha-4A chain OS=Mus musculus OX=10090 GN=Tuba4a PE=1 SV=1	49.9	4.72442e+07	4.62215e+07	6.55737e+07	1.83763e+08	1.36671e+08	1.84847e+08	1.37051e+08	1.44098e+08	1.83894e+08	6.05754e+07	5.37322e+07	6.90352e+07
Q62419	Endophilin-A2 OS=Mus musculus OX=10090 GN=Sh3gl1 PE=1 SV=1	41.5	3.68847e+06	3.74788e+06	4.86571e+06	1.36052e+07	1.49032e+07	1.47251e+07	1.93982e+07	2.21769e+07	2.20785e+07	9.53178e+06	9.44184e+06	8.93111e+06
Q91VX2	Ubiquitin-associated protein 2 OS=Mus musculus OX=10090 GN=Ubap2 PE=1 SV=1	117.9	639367	483504	784691	440074	490574	624015	6.8934e+06	7.50367e+06	6.59362e+06	566059	668262	950830
Q8VDJ3	Vigilin OS=Mus musculus OX=10090 GN=Hdlbp PE=1 SV=1	141.7	1.51001e+06	1.75919e+06	1.08318e+06	4.19979e+06	5.00702e+06	4.78609e+06	1.84446e+07	2.3123e+07	2.02531e+07	7.42602e+06	9.56174e+06	8.05651e+06
Q9CQG2	U6 small nuclear RNA (adenine-(43)-N(6))-methyltransferase OS=Mus musculus OX=10090 GN=Mettl16 PE=1 SV=1	62.3	1.48151e+06	1.47675e+06	1.26408e+06	753673	938835	315245	6.66262e+06	5.94907e+06	6.72226e+06	862730	609722	77328.2
Q9Z1N5	Spliceosome RNA helicase Ddx39b OS=Mus musculus OX=10090 GN=Ddx39b PE=1 SV=1	49	6.51499e+07	8.4788e+07	5.02463e+07	9.00688e+07	6.9051e+07	6.90085e+07	1.00824e+08	1.04949e+08	7.35282e+07	1.47717e+07	1.14835e+07	1.33514e+07
Q9DB27	Malignant T-cell-amplified sequence 1 OS=Mus musculus OX=10090 GN=Mcts1 PE=1 SV=1	20.5	1.61743e+06	3.04413e+06	2.44667e+06	1.13792e+07	8.94417e+06	7.08774e+06	3.85136e+06	5.28055e+06	4.44909e+06	2.17855e+06	2.22383e+06	2.1038e+06
P61358	60S ribosomal protein L27 OS=Mus musculus OX=10090 GN=Rpl27 PE=1 SV=2	15.8	2.45133e+07	2.47213e+07	2.44818e+07	2.48349e+07	3.37089e+07	2.77356e+07	5.44947e+07	6.21336e+07	5.01621e+07	6.79999e+06	9.16025e+06	8.0195e+06
Q3TWW8	Serine/arginine-rich splicing factor 6 OS=Mus musculus OX=10090 GN=Srsf6 PE=1 SV=1	39	1.84806e+06	1.72348e+06	597171	1.16295e+06	1.10005e+06	1.25999e+06	3.11687e+06	3.00449e+06	1.22921e+06	305182	117225	510859
Q9DCW4	Electron transfer flavoprotein subunit beta OS=Mus musculus OX=10090 GN=Etfb PE=1 SV=3	27.6	5.4882e+06	6.77834e+06	6.08013e+06	1.7903e+07	2.11198e+07	1.70683e+07	1.13281e+07	15417487	13952542	5.34055e+06	4.94223e+06	4.93374e+06
P35235	Tyrosine-protein phosphatase non-receptor type 11 OS=Mus musculus OX=10090 GN=Ptpn11 PE=1 SV=2	68.4	862472	1.00417e+06	501318	1.29521e+07	9.14507e+06	1.07938e+07	2.29053e+06	1.8012e+06	2.73176e+06	5.8096e+06	3.06047e+06	3.48612e+06
Q3TWN3	Metal transporter CNNM2 OS=Mus musculus OX=10090 GN=Cnnm2 PE=1 SV=3	96.6								126026	119551
Q9CWZ7	Gamma-soluble NSF attachment protein OS=Mus musculus OX=10090 GN=Napg PE=1 SV=1	34.7	332969	327802	235665	2.44451e+06	1.17142e+06	1.40271e+06	956267	1.16145e+06	988698	911083	404609	865413
Q9D1R9	60S ribosomal protein L34 OS=Mus musculus OX=10090 GN=Rpl34 PE=1 SV=2	13.3	1.35208e+07	1.04013e+07	1.33881e+07	2.29126e+07	2.67164e+07	1.90521e+07	30182956	2.45284e+07	31421553	5.55022e+06	7776565	6.20091e+06
P84099	60S ribosomal protein L19 OS=Mus musculus OX=10090 GN=Rpl19 PE=1 SV=1	23.5	1.72127e+07	1.95769e+07	1.43436e+07	2.80495e+07	4.15812e+07	2.2613e+07	3.14277e+07	4.78238e+07	2.67706e+07	6.98093e+06	1.02206e+07	5.7091e+06
Q3V0K9	Plastin-1 OS=Mus musculus OX=10090 GN=Pls1 PE=1 SV=1	70.4							137629	124587
Q80UG5	Septin-9 OS=Mus musculus OX=10090 GN=Sept9 PE=1 SV=1	65.5	3.59356e+06	3.66913e+06	4.52961e+06	2.4905e+07	1.56869e+07	1.7535e+07	1.3299e+07	1.63587e+07	1.55083e+07	1.04022e+07	9.48904e+06	7.2663e+06
Q99JR1	Sideroflexin-1 OS=Mus musculus OX=10090 GN=Sfxn1 PE=1 SV=3	35.6	2.42015e+06	3.59385e+06	2.59483e+06	2.88535e+06	2.35563e+06	955924	3.80107e+06	4.55212e+06	4.72669e+06	399238	258737	421061
P56546	C-terminal-binding protein 2 OS=Mus musculus OX=10090 GN=Ctbp2 PE=1 SV=2	48.9	1.44725e+07	1.21033e+07	1.42557e+07	1.28097e+07	7.37585e+06	1.02194e+07	4.23749e+07	45009608	3.86775e+07	3.94315e+06	2.42184e+06	5.5171e+06
P30416	Peptidyl-prolyl cis-trans isomerase FKBP4 OS=Mus musculus OX=10090 GN=Fkbp4 PE=1 SV=5	51.5	4.79358e+07	4.11407e+07	5.22021e+07	9.59209e+07	1.11003e+08	1.07905e+08	1.49751e+08	1.56859e+08	1.70029e+08	4.33044e+07	4.25099e+07	4.47039e+07
Q8BK67	Protein RCC2 OS=Mus musculus OX=10090 GN=Rcc2 PE=1 SV=1	55.9	1.85534e+07	1.79895e+07	1.74595e+07	1.4281e+07	2.36621e+07	1.85836e+07	6.27523e+07	64453459	5.29511e+07	6.30362e+06	8.87634e+06	7.59189e+06
P62259	14-3-3 protein epsilon OS=Mus musculus OX=10090 GN=Ywhae PE=1 SV=1	29.2	1.95563e+08	1.73022e+08	2.00009e+08	1.50191e+09	1.39357e+09	1.06471e+09	5.02748e+08	5.05139e+08	5.08627e+08	5.11847e+08	4.37528e+08	3.49412e+08
P62141	Serine/threonine-protein phosphatase PP1-beta catalytic subunit OS=Mus musculus OX=10090 GN=Ppp1cb PE=1 SV=3	37.2	1.74543e+06	1.77331e+06	1.06131e+06	7.21029e+06	5986774	4.063e+06	8.3467e+06	9.75418e+06	5.77442e+06	4.51097e+06	5.3143e+06	1.92053e+06
Q8BXZ1	Protein disulfide-isomerase TMX3 OS=Mus musculus OX=10090 GN=Tmx3 PE=1 SV=2	51.8	434480	382237	746192	2819009	2.27672e+06	2.57548e+06	1.66711e+06	1.927e+06	2.06983e+06	1.14829e+06	1.11054e+06	1.27125e+06
Q6P9R2	Serine/threonine-protein kinase OSR1 OS=Mus musculus OX=10090 GN=Oxsr1 PE=1 SV=1	58.2	5.23567e+06	4.84536e+06	4.61737e+06	1.22769e+07	1.1828e+07	1.11803e+07	1.02038e+07	1.22932e+07	1.15027e+07	3.20492e+06	3.02786e+06	3.75064e+06
P53026	60S ribosomal protein L10a OS=Mus musculus OX=10090 GN=Rpl10a PE=1 SV=3	24.9	3.42074e+07	3.70543e+07	3.18285e+07	3.58135e+07	3.93178e+07	3.70784e+07	7.81357e+07	9.57216e+07	7.11991e+07	8.73274e+06	1.23394e+07	1.16364e+07
Q61990	Poly(rC)-binding protein 2 OS=Mus musculus OX=10090 GN=Pcbp2 PE=1 SV=1	38.2	1.86866e+07	2.1902e+07	1.85304e+07	5.44472e+07	6.12802e+07	47178105	7.0081e+07	9.62319e+07	7.64323e+07	2.92785e+07	2.4353e+07	2.72494e+07
Q501J7	Phosphatase and actin regulator 4 OS=Mus musculus OX=10090 GN=Phactr4 PE=1 SV=2	76.6					126235	63005
Q9CQ92	Mitochondrial fission 1 protein OS=Mus musculus OX=10090 GN=Fis1 PE=1 SV=1	17	1.44889e+06	1.06214e+06	1.36517e+06	1.42893e+07	1.43308e+07	8.57069e+06	5.23523e+06	5.90668e+06	5.04693e+06	7.1843e+06	6.20817e+06	5.30432e+06
Q9D967	Magnesium-dependent phosphatase 1 OS=Mus musculus OX=10090 GN=Mdp1 PE=1 SV=1	18.6	1.35698e+06	591550	1.29511e+06	9.67249e+06	7.45721e+06	6.98232e+06	2.96312e+06	2.012e+06	3.59787e+06	3.09952e+06	2.00302e+06	3.03553e+06
P68254	14-3-3 protein theta OS=Mus musculus OX=10090 GN=Ywhaq PE=1 SV=1	27.8	5.70407e+07	4.2393e+07	6.75345e+07	3.75459e+08	3.17624e+08	2.81176e+08	1.78242e+08	1.56673e+08	1.98134e+08	1.52343e+08	1.16816e+08	1.15364e+08
Q9Z1D1	Eukaryotic translation initiation factor 3 subunit G OS=Mus musculus OX=10090 GN=Eif3g PE=1 SV=2	35.6	8.22559e+06	8.07734e+06	8.17692e+06	6.61131e+06	1.48315e+07	1.08667e+07	3.04003e+07	3.68051e+07	2.93116e+07	3.81542e+06	5.86672e+06	5.18882e+06
Q9CWK8	Sorting nexin-2 OS=Mus musculus OX=10090 GN=Snx2 PE=1 SV=2	58.4	5.79591e+06	5.33695e+06	6.4717e+06	1.59348e+07	1.85058e+07	1.6074e+07	1.66371e+07	1.44754e+07	2.27376e+07	5.94577e+06	5.80907e+06	6.7668e+06
P51174	Long-chain specific acyl-CoA dehydrogenase, mitochondrial OS=Mus musculus OX=10090 GN=Acadl PE=1 SV=2	47.9	223992	713059	594627	4.53837e+06	7.72495e+06	1.07931e+07	1.88944e+06	2.5044e+06	1.08142e+06	1.62371e+06	4.30558e+06	5.25679e+06
Q9EP82	tRNA (guanine-N(7)-)-methyltransferase non-catalytic subunit WDR4 OS=Mus musculus OX=10090 GN=Wdr4 PE=1 SV=2	45.7							475383	472621	476560	280972	255483
Q9CPU0	Lactoylglutathione lyase OS=Mus musculus OX=10090 GN=Glo1 PE=1 SV=3	20.8	1.60698e+07	1.51077e+07	1.75069e+07	8.29109e+07	7.72551e+07	5.78701e+07	4.02705e+07	4.01035e+07	4.641e+07	2.60801e+07	2.46326e+07	1.83105e+07
Q9CQD1	Ras-related protein Rab-5A OS=Mus musculus OX=10090 GN=Rab5a PE=1 SV=1	23.6	2.04292e+06	1.97785e+06	2.27124e+06	2.05441e+07	2.04595e+07	1.37516e+07	9.01026e+06	1.09364e+07	1.00884e+07	1.35257e+07	1.13071e+07	7.35555e+06
Q9CQK7	RWD domain-containing protein 1 OS=Mus musculus OX=10090 GN=Rwdd1 PE=1 SV=1	27.8	830421	1.18415e+06	1.94945e+06	4.97302e+06	4.39952e+06	3.93343e+06	5.01627e+06	5.86394e+06	4.85235e+06	2.48435e+06	2.17703e+06	2.12148e+06
P47738	Aldehyde dehydrogenase, mitochondrial OS=Mus musculus OX=10090 GN=Aldh2 PE=1 SV=1	56.5	3.50894e+07	2.9613e+07	3.60798e+07	3.8632e+07	6.08728e+07	5.03315e+07	1.06695e+08	1.2814e+08	1.34904e+08	1.56033e+07	2.79108e+07	2.39318e+07
Q9JI46	Diphosphoinositol polyphosphate phosphohydrolase 1 OS=Mus musculus OX=10090 GN=Nudt3 PE=1 SV=1	19	70898.4	94854.6	149346	3.33835e+06	4.21785e+06	2.77718e+06	362008	473358	872743	2.10916e+06	2.889e+06	1.70368e+06
O55125	Protein NipSnap homolog 1 OS=Mus musculus OX=10090 GN=Nipsnap1 PE=1 SV=1	33.3	1.04398e+07	5.1143e+06	5.08156e+06	3.54449e+07	2.95922e+07	2.38059e+07	7.75267e+06	8.68452e+06	6.46228e+06	6.28734e+06	3.56358e+06	3.17676e+06
Q9CY58	Plasminogen activator inhibitor 1 RNA-binding protein OS=Mus musculus OX=10090 GN=Serbp1 PE=1 SV=2	44.7	3.84015e+07	3.1468e+07	4.06034e+07	3.60068e+07	5.45929e+07	40149475	1.38036e+08	1.39448e+08	1.32561e+08	1.83416e+07	2.32964e+07	1.7072e+07
Q61792	LIM and SH3 domain protein 1 OS=Mus musculus OX=10090 GN=Lasp1 PE=1 SV=1	30	3.688e+06	2.95806e+06	5.1434e+06	1.7402e+07	9.39316e+06	1.28637e+07	1.45448e+07	1.65013e+07	1.68743e+07	9.04723e+06	4.93633e+06	6.03981e+06
Q9CXT8	Mitochondrial-processing peptidase subunit beta OS=Mus musculus OX=10090 GN=Pmpcb PE=1 SV=1	54.6	669287	333642	257629	1.18989e+06	1.05657e+06	1.21422e+06	3.4043e+06	4.01379e+06	3.8749e+06	1.13403e+06	1.24903e+06	1.76165e+06
P46460	Vesicle-fusing ATPase OS=Mus musculus OX=10090 GN=Nsf PE=1 SV=2	82.6	5.52271e+06	4.07141e+06	6.14143e+06	2.27541e+07	1.55684e+07	1.11956e+07	1.86521e+07	1.49398e+07	2.35087e+07	1.52912e+07	5.07526e+06	4.29887e+06
Q9ERS2	NADH dehydrogenase [ubiquinone] 1 alpha subcomplex subunit 13 OS=Mus musculus OX=10090 GN=Ndufa13 PE=1 SV=3	16.8	701422	645892	643353	133140	295502	382163	2.0355e+06	1.84728e+06	387905	135248	82501.4
O09167	60S ribosomal protein L21 OS=Mus musculus OX=10090 GN=Rpl21 PE=1 SV=3	18.6	1.99613e+07	1.56209e+07	2.47533e+07	1.59902e+07	1.67012e+07	2.53706e+07	4.82175e+07	4.35547e+07	5.8609e+07	4.28079e+06	5.75475e+06	7.76303e+06
Q91WK2	Eukaryotic translation initiation factor 3 subunit H OS=Mus musculus OX=10090 GN=Eif3h PE=1 SV=1	39.8	7.1074e+06	8.48855e+06	8.15265e+06	1.00659e+07	1.03995e+07	1.16077e+07	2.19104e+07	2.772e+07	2.9402e+07	3.93722e+06	3.66667e+06	5.40649e+06
O08997	Copper transport protein ATOX1 OS=Mus musculus OX=10090 GN=Atox1 PE=1 SV=1	7.3	5.13871e+06	8.34026e+06	8.10337e+06	1.03562e+07	1.17825e+07	8.68778e+06	2.13813e+07	3.92323e+07	2.87157e+07	5.3386e+06	4.84343e+06	5.02819e+06
Q9DBP5	UMP-CMP kinase OS=Mus musculus OX=10090 GN=Cmpk1 PE=1 SV=1	22.2	2.85754e+06	2.54964e+06	3.2793e+06	3.99926e+07	28229956	2.36964e+07	7.98271e+06	6.72809e+06	8.7781e+06	1.31883e+07	9.19929e+06	7.69073e+06
O88384	Vesicle transport through interaction with t-SNAREs homolog 1B OS=Mus musculus OX=10090 GN=Vti1b PE=1 SV=1	26.7							372571	277307	402843	153138	133731
P97765	WW domain-binding protein 2 OS=Mus musculus OX=10090 GN=Wbp2 PE=1 SV=1	28	212476	173529	277906	1.26603e+06	1.52126e+06	1.35441e+06	2.48655e+06	2.10863e+06	2.67256e+06	2.31692e+06	1.61802e+06	1.677e+06
Q9R257	Heme-binding protein 1 OS=Mus musculus OX=10090 GN=Hebp1 PE=1 SV=2	21.1	1.68161e+06	1.04128e+06	2.04727e+06	5.67104e+06	4.76182e+06	5.70636e+06	2.46718e+06	2.15889e+06	3.62768e+06	1.09895e+06	865183	1.5387e+06
Q6ZQ08	CCR4-NOT transcription complex subunit 1 OS=Mus musculus OX=10090 GN=Cnot1 PE=1 SV=2	266.6	4.87589e+06	4.11737e+06	4.76636e+06	9.71133e+06	1.02393e+07	1.01033e+07	2.55005e+07	2.40572e+07	2.05917e+07	6.47777e+06	9.88373e+06	3.64475e+06
Q3THE2	Myosin regulatory light chain 12B OS=Mus musculus OX=10090 GN=Myl12b PE=1 SV=2	19.8	1.88562e+06	2.41699e+06	3.54365e+06	2.33663e+07	2.41229e+07	2.35525e+07	8.46908e+06	1.11652e+07	8.50005e+06	8.69945e+06	1.09284e+07	1.22256e+07
Q8CH18	Cell division cycle and apoptosis regulator protein 1 OS=Mus musculus OX=10090 GN=Ccar1 PE=1 SV=1	132	2.89585e+06	3.59465e+06	3.68587e+06	4.1329e+07	3.98372e+07	4.66428e+07	6.71311e+06	1.00741e+07	7.32728e+06	1.13613e+07	1.07982e+07	1.42157e+07
P67778	Prohibitin OS=Mus musculus OX=10090 GN=Phb PE=1 SV=1	29.8	4.98202e+07	4.48173e+07	4.29821e+07	1.78591e+07	1.6876e+07	1.23605e+07	1.21456e+08	1.24111e+08	1.26106e+08	4.57146e+06	7.73356e+06	3.66456e+06
P63276	40S ribosomal protein S17 OS=Mus musculus OX=10090 GN=Rps17 PE=1 SV=2	15.5	4.12441e+07	3.64058e+07	2.30086e+07	4.01959e+07	3.32916e+07	2.71836e+07	9.72759e+07	1.04362e+08	6.2074e+07	1.1411e+07	1.15524e+07	8.83513e+06
P15105	Glutamine synthetase OS=Mus musculus OX=10090 GN=Glul PE=1 SV=6	42.1	511810	252292	367452	1.78135e+06	1.4346e+06	1.39679e+06	1.3622e+07	1.8019e+07	1.53045e+07	8.32554e+06	6.69974e+06	8.87837e+06
Q9D3D9	ATP synthase subunit delta, mitochondrial OS=Mus musculus OX=10090 GN=Atp5f1d PE=1 SV=1	17.6	7.00696e+06	2.07885e+06	7.05636e+06	7.63209e+06	8.17593e+06	4.32236e+06	2.02604e+07	1.1915e+07	2.05294e+07	2.77457e+06	3.52537e+06	2.32753e+06
Q9WUL7	ADP-ribosylation factor-like protein 3 OS=Mus musculus OX=10090 GN=Arl3 PE=1 SV=1	20.5	1.1064e+06	490965	1.20787e+06	2.62388e+07	2.58921e+07	2.11189e+07	4.17007e+06	4295833	5.19866e+06	1.58169e+07	1.81255e+07	1.24136e+07
Q9EQF6	Dihydropyrimidinase-related protein 5 OS=Mus musculus OX=10090 GN=Dpysl5 PE=1 SV=1	61.5	288531	4.48329e+06	446923	2.0073e+08	1.22039e+08	1.26945e+08	3.33051e+06	1.49937e+06	1.92055e+06	6.41063e+07	3.54596e+07	3.96549e+07
Q8CIG8	Protein arginine N-methyltransferase 5 OS=Mus musculus OX=10090 GN=Prmt5 PE=1 SV=3	72.6	1.40818e+07	1.3303e+07	1.47761e+07	2.76845e+07	2.84757e+07	3.16759e+07	2.7562e+07	3.2681e+07	2.78527e+07	8.39505e+06	6.05424e+06	7.77963e+06
Q8CFI7	DNA-directed RNA polymerase II subunit RPB2 OS=Mus musculus OX=10090 GN=Polr2b PE=1 SV=2	133.8	1.6683e+07	1.17774e+07	1.555e+07	2.14675e+07	2.19417e+07	2.22107e+07	5.03316e+07	4.71189e+07	4.93789e+07	9.22047e+06	9.81543e+06	7.72754e+06
Q80W37	Snurportin-1 OS=Mus musculus OX=10090 GN=Snupn PE=2 SV=1	41								121850	125142
Q8K003	Translation machinery-associated protein 7 OS=Mus musculus OX=10090 GN=Tma7 PE=3 SV=1	7.1	571997	529744	449648	4.05183e+06	1.52885e+06	1.86845e+06	2.20764e+06	2.39935e+06	1.96913e+06	2.05442e+06	699962	1.07226e+06
Q99LF4	tRNA-splicing ligase RtcB homolog OS=Mus musculus OX=10090 GN=Rtcb PE=1 SV=1	55.2	8.77456e+06	9.85808e+06	8.93016e+06	1.84431e+07	2.21799e+07	2.37526e+07	2.41675e+07	3.2097e+07	1.92394e+07	6.4333e+06	7.14834e+06	7.08041e+06
P97801	Survival motor neuron protein OS=Mus musculus OX=10090 GN=Smn1 PE=1 SV=1	31.2	1.25824e+06	449423	411495	14124187	4.1363e+06	1.51873e+06	4.85129e+06	1.80688e+06	1.40409e+06	6954763	1.66008e+06	704996
Q9Z0N1	Eukaryotic translation initiation factor 2 subunit 3, X-linked OS=Mus musculus OX=10090 GN=Eif2s3x PE=1 SV=2	51	2.07535e+07	2.06567e+07	2.11886e+07	3.45838e+07	3.64012e+07	3.27009e+07	6.11102e+07	6.79985e+07	5.98344e+07	1.30941e+07	1.20574e+07	1.2376e+07
Q3UHX2	28 kDa heat- and acid-stable phosphoprotein OS=Mus musculus OX=10090 GN=Pdap1 PE=1 SV=1	20.6	2.45564e+06	2.30076e+06	3.40689e+06	5.47527e+06	5.40305e+06	7.01025e+06	9.21823e+06	8.84802e+06	1.0541e+07	2.54039e+06	2.01786e+06	3.13143e+06
O88322	Nidogen-2 OS=Mus musculus OX=10090 GN=Nid2 PE=1 SV=2	153.8							343642	509528	259622	86976.3	284763
Q8C7R4	Ubiquitin-like modifier-activating enzyme 6 OS=Mus musculus OX=10090 GN=Uba6 PE=1 SV=1	117.9	4.55e+06	5.23235e+06	7.66714e+06	2.03174e+07	1.83853e+07	2.06517e+07	2.14105e+07	2.35376e+07	2.26979e+07	9.0785e+06	8.47057e+06	1.08814e+07
P27546	Microtubule-associated protein 4 OS=Mus musculus OX=10090 GN=Map4 PE=1 SV=3	117.4	3.99153e+07	3.02865e+07	3.71705e+07	3.89724e+08	2.63362e+08	2.17341e+08	1.08896e+08	1.00484e+08	1.1151e+08	1.50279e+08	8.29938e+07	8.40349e+07
Q9CVB6	Actin-related protein 2/3 complex subunit 2 OS=Mus musculus OX=10090 GN=Arpc2 PE=1 SV=3	34.3	6.42996e+06	3.51623e+06	7.49727e+06	4.76178e+07	3.76793e+07	4.01466e+07	1.29995e+07	1.08378e+07	1.82181e+07	1.37469e+07	9.90955e+06	1.3832e+07
P11031	Activated RNA polymerase II transcriptional coactivator p15 OS=Mus musculus OX=10090 GN=Sub1 PE=1 SV=3	14.4	6.95296e+06	6.29985e+06	6.77466e+06	5.92078e+06	1.10702e+07	7.9554e+06	1.83223e+07	1.94257e+07	1.70545e+07	1.86369e+06	3.55311e+06	2.77237e+06
P62267	40S ribosomal protein S23 OS=Mus musculus OX=10090 GN=Rps23 PE=1 SV=3	15.8	2.15639e+07	2.08985e+07	2.17918e+07	2.18815e+07	3.05562e+07	2.29584e+07	5.02187e+07	5.1662e+07	4.96233e+07	5.97268e+06	8.91536e+06	6.50038e+06
Q99LG0	Ubiquitin carboxyl-terminal hydrolase 16 OS=Mus musculus OX=10090 GN=Usp16 PE=1 SV=2	93.4							138762	152631	64277.4			69078.9
P80313	T-complex protein 1 subunit eta OS=Mus musculus OX=10090 GN=Cct7 PE=1 SV=1	59.6	4.00758e+07	3.88999e+07	4.80708e+07	1.21409e+08	1.33658e+08	1.047e+08	1.2101e+08	1.3144e+08	1.32782e+08	4.7062e+07	4.35814e+07	4.00971e+07
P26350	Prothymosin alpha OS=Mus musculus OX=10090 GN=Ptma PE=1 SV=2	12.2	2.23561e+07	1.43405e+07	2.6754e+07	5.83891e+07	3.83331e+07	5.91717e+07	7.2796e+07	5.00499e+07	8.13258e+07	2.22218e+07	1.41044e+07	2.49687e+07
O09106	Histone deacetylase 1 OS=Mus musculus OX=10090 GN=Hdac1 PE=1 SV=1	55	6.85494e+06	5.77551e+06	2.96105e+06	5.6257e+06	5.64336e+06	6.6727e+06	3.05466e+07	3.48818e+07	2.16682e+07	3.58557e+06	5.67856e+06	3.50057e+06
Q9DCX2	ATP synthase subunit d, mitochondrial OS=Mus musculus OX=10090 GN=Atp5pd PE=1 SV=3	18.7	9.21395e+06	7.17437e+06	1.02233e+07	1.16893e+07	8.27212e+06	8.22153e+06	2.67287e+07	2.4193e+07	2.86199e+07	4.0634e+06	3.17295e+06	2.88126e+06
P58771	Tropomyosin alpha-1 chain OS=Mus musculus OX=10090 GN=Tpm1 PE=1 SV=1	32.7	1.23802e+07	9.75413e+06	1.1081e+07	5.38514e+07	4.5691e+07	6.20982e+07	2.83199e+07	2.33967e+07	2.65562e+07	1.64933e+07	1.00475e+07	2.06747e+07
Q8BTX9	Inactive hydroxysteroid dehydrogenase-like protein 1 OS=Mus musculus OX=10090 GN=Hsdl1 PE=1 SV=1	36.8				1.1227e+07	9.59551e+06	10363507			48020.6	4.25183e+06	3.65929e+06	3.04153e+06
Q03265	ATP synthase subunit alpha, mitochondrial OS=Mus musculus OX=10090 GN=Atp5f1a PE=1 SV=1	59.7	7.83083e+07	7.34121e+07	8.39343e+07	1.07145e+08	8.85291e+07	9.19243e+07	2.03043e+08	2.2296e+08	2.30815e+08	3.58183e+07	2.61933e+07	3.4291e+07
P70318	Nucleolysin TIAR OS=Mus musculus OX=10090 GN=Tial1 PE=1 SV=1	43.4	1.21514e+06	2.82059e+06	784626	1.10347e+06	2.86421e+06	2.6195e+06	4.4529e+06	7.59168e+06	3130827	450390	1.55363e+06	791228
Q8K297	Procollagen galactosyltransferase 1 OS=Mus musculus OX=10090 GN=Colgalt1 PE=1 SV=2	71	5.81687e+06	752482	1.13152e+06	1.87701e+06	3.08745e+06	2.94725e+06	5.41596e+06	5.46664e+06	5.3095e+06	1.00345e+06	940771	973796
P61750	ADP-ribosylation factor 4 OS=Mus musculus OX=10090 GN=Arf4 PE=1 SV=2	20.4	4.85654e+06	3.51181e+06	2.93161e+06	4.70956e+07	4.36596e+07	2.34898e+07	1.85449e+07	1.51708e+07	1.67641e+07	1.91433e+07	3.01411e+07	1.33768e+07
Q3UDR8	Protein YIPF3 OS=Mus musculus OX=10090 GN=Yipf3 PE=1 SV=1	38							1440852		1.27643e+06			1.13683e+06
P97287	Induced myeloid leukemia cell differentiation protein Mcl-1 homolog OS=Mus musculus OX=10090 GN=Mcl1 PE=1 SV=3	35.2							966933	997328	358665	95129.5	198138	121686
Q9DBX2	Phosducin-like protein OS=Mus musculus OX=10090 GN=Pdcl PE=1 SV=1	34.4				217269	191670	142923	933093	802387	1.10006e+06	2.46106e+06	2.0635e+06	1.4731e+06
A2BE28	Ribosomal biogenesis protein LAS1L OS=Mus musculus OX=10090 GN=Las1l PE=1 SV=1	89.4	1.31024e+06	385253	753694	1.07713e+06	1.07864e+06	478146	9.63266e+06	1.03711e+07	5.28453e+06	294614	2.01423e+06	2.18678e+06
P41105	60S ribosomal protein L28 OS=Mus musculus OX=10090 GN=Rpl28 PE=1 SV=2	15.7	1.88959e+07	1.08706e+07	1.80974e+07	2.11678e+07	1.36499e+07	2.22539e+07	4.53047e+07	3.42604e+07	4.27409e+07	5.43857e+06	4.88342e+06	7.26881e+06
Q9QWI6	SRC kinase signaling inhibitor 1 OS=Mus musculus OX=10090 GN=Srcin1 PE=1 SV=2	134.8				614648		308618				451790
Q8BMA6	Signal recognition particle subunit SRP68 OS=Mus musculus OX=10090 GN=Srp68 PE=1 SV=2	70.5	3.77084e+06	3.44931e+06	3.98382e+06	7.2459e+06	9.70938e+06	8.68618e+06	1.6727e+07	1.76192e+07	1.42712e+07	4.23314e+06	4.93685e+06	3.98963e+06
Q3ULJ0	Glycerol-3-phosphate dehydrogenase 1-like protein OS=Mus musculus OX=10090 GN=Gpd1l PE=1 SV=2	38.2	512037	347452	461404	2.69604e+06	2.03948e+06	2.32907e+06	2.23424e+06	2.939e+06	2.1942e+06	1.5227e+06	1533741	1.61654e+06
Q920B9	FACT complex subunit SPT16 OS=Mus musculus OX=10090 GN=Supt16h PE=1 SV=2	119.7	5.56089e+06	5.54618e+06	5.81484e+06	2.36587e+06	4.52731e+06	5.65541e+06	3.11181e+07	2.96563e+07	2.85174e+07	2.15914e+06	2.68077e+06	2.57865e+06
P19157	Glutathione S-transferase P 1 OS=Mus musculus OX=10090 GN=Gstp1 PE=1 SV=2	23.6	9.44536e+06	1.07042e+07	1.18601e+07	3.73506e+07	4.25914e+07	4.47128e+07	1.45774e+07	2.05193e+07	1.76878e+07	6.72196e+06	8.2969e+06	9.42989e+06
P70227	Inositol 1,4,5-trisphosphate receptor type 3 OS=Mus musculus OX=10090 GN=Itpr3 PE=1 SV=3	304.1							114442	160300
Q80VQ1	Leucine-rich repeat-containing protein 1 OS=Mus musculus OX=10090 GN=Lrrc1 PE=1 SV=2	59.4									568928
Q9CQ25	Mitotic-spindle organizing protein 2 OS=Mus musculus OX=10090 GN=Mzt2 PE=1 SV=1	16.5		144972	89285.4	603822	997260	495054			480294	248206	319837
Q7TMB8	Cytoplasmic FMR1-interacting protein 1 OS=Mus musculus OX=10090 GN=Cyfip1 PE=1 SV=1	145.1	3.58686e+06	3.30243e+06	3.82751e+06	1.90609e+07	1.85654e+07	9.67522e+06	1.36387e+07	1.42171e+07	1.16668e+07	6.72417e+06	7.37939e+06	5.73037e+06
Q9CZ91	Serum response factor-binding protein 1 OS=Mus musculus OX=10090 GN=Srfbp1 PE=1 SV=1	48.7							101259	185362
P62754	40S ribosomal protein S6 OS=Mus musculus OX=10090 GN=Rps6 PE=1 SV=1	28.7	4.40196e+07	3.55678e+07	4.41975e+07	3.65672e+07	4.85026e+07	4.85489e+07	9.90747e+07	9.09459e+07	1.04637e+08	9120547	1.30136e+07	1.63784e+07
Q8BFZ9	Erlin-2 OS=Mus musculus OX=10090 GN=Erlin2 PE=1 SV=1	37.8	1.25548e+06	1.28712e+06	1.38608e+06	7.7403e+06	8.47973e+06	9.05685e+06	3.5121e+06	3.70481e+06	4.8956e+06	3.75703e+06	2.28849e+06	3.25583e+06
P51881	ADP/ATP translocase 2 OS=Mus musculus OX=10090 GN=Slc25a5 PE=1 SV=3	32.9	7.9327e+07	7.5718e+07	7.00235e+07	7.30349e+07	6.39812e+07	3.85973e+07	2.08356e+08	2.26922e+08	1.80423e+08	1.9683e+07	2.05131e+07	1.49866e+07
P24288	Branched-chain-amino-acid aminotransferase, cytosolic OS=Mus musculus OX=10090 GN=Bcat1 PE=1 SV=2	42.8	9.5547e+06	6.56922e+06	8.57774e+06	1.70946e+07	2.19321e+07	1.41932e+07	2.89301e+07	2.55781e+07	2.39418e+07	5.36094e+06	7.91906e+06	6.78879e+06
Q9CY27	Very-long-chain enoyl-CoA reductase OS=Mus musculus OX=10090 GN=Tecr PE=1 SV=1	36.1	375662	123010	490522	2.48859e+06	2.99792e+06	1.67524e+06	2.1314e+06	3.04385e+06	2.34935e+06	2.84908e+06	1.93902e+06	2.49586e+06
Q9CWI3	BRCA2 and CDKN1A-interacting protein OS=Mus musculus OX=10090 GN=Bccip PE=1 SV=1	35.9	486056	890722	1.48651e+06	142717	236700	470504	6.99201e+06	9.03288e+06	9.12943e+06	287833	523467	154976
P46656	Adrenodoxin, mitochondrial OS=Mus musculus OX=10090 GN=Fdx1 PE=1 SV=1	20.1							832574	841849	731601	94244.7	196388	149157
P09405	Nucleolin OS=Mus musculus OX=10090 GN=Ncl PE=1 SV=2	76.7	1.07013e+08	8.79731e+07	9.77162e+07	8.88012e+07	1.32707e+08	1.0894e+08	2.62132e+08	2.47399e+08	2.25222e+08	2.4784e+07	4.08792e+07	3.27812e+07
Q1HKZ5	Mitogen-activated protein kinase kinase kinase 13 OS=Mus musculus OX=10090 GN=Map3k13 PE=1 SV=1	106.9	436402	277102		101823	249251	110326		1.05739e+06
P97313	DNA-dependent protein kinase catalytic subunit OS=Mus musculus OX=10090 GN=Prkdc PE=1 SV=3	471.2							131667	102609
P84084	ADP-ribosylation factor 5 OS=Mus musculus OX=10090 GN=Arf5 PE=1 SV=2	20.5	1.77988e+06	713040	1.76494e+06	1.73416e+07	1.40536e+07	1.72068e+07	6.12853e+06	9087818	6.41734e+06	1.2463e+07	7.72073e+06	1.12689e+07
Q8JZQ9	Eukaryotic translation initiation factor 3 subunit B OS=Mus musculus OX=10090 GN=Eif3b PE=1 SV=1	91.3	3.43305e+07	3.58554e+07	3.37281e+07	4.99748e+07	6.04886e+07	4.51071e+07	7.1596e+07	1.1641e+08	9.83169e+07	1.59795e+07	2.51144e+07	1.08558e+07
Q9Z172	Small ubiquitin-related modifier 3 OS=Mus musculus OX=10090 GN=Sumo3 PE=1 SV=1	12.4	4.41572e+06	3.5478e+06	2915525	1.41832e+07	5.05148e+06	1.67227e+07	1.8051e+07	1.68085e+07	1.296e+07	7.34129e+06	2.50742e+06	9.07092e+06
Q8C4J7	Transducin beta-like protein 3 OS=Mus musculus OX=10090 GN=Tbl3 PE=2 SV=1	88.2		242487	226064				1.10792e+06	1.39158e+06	882841	80305.1
O35459	Delta(3,5)-Delta(2,4)-dienoyl-CoA isomerase, mitochondrial OS=Mus musculus OX=10090 GN=Ech1 PE=1 SV=1	36.1	391680	157784	492441	1.62296e+06	2877904	1.52075e+06	1.61172e+06	1.32033e+06	1.29813e+06	618482	1.29829e+06	1.29705e+06
Q8BGF3	WD repeat-containing protein 92 OS=Mus musculus OX=10090 GN=Wdr92 PE=1 SV=1	39.8	76015.4		108662	177418	93340.6	164303	1.54175e+06	1.35084e+06	1.65048e+06	705024	429864	594958
Q06138	Calcium-binding protein 39 OS=Mus musculus OX=10090 GN=Cab39 PE=1 SV=2	39.8	860524	1.63707e+06	2.21616e+06	2.24859e+07	2.29788e+07	1.87624e+07	6.31108e+06	8.47248e+06	6.0116e+06	1.46818e+07	1.10096e+07	9.94773e+06
Q9ESN6	Tripartite motif-containing protein 2 OS=Mus musculus OX=10090 GN=Trim2 PE=1 SV=1	81.4	383029	437523	93531.5	1.24662e+07	9.25951e+06	8.67097e+06	1.21439e+06	3.82956e+06	422489	8.47932e+06	4.70036e+06	5.0685e+06
Q9WUD1	STIP1 homology and U box-containing protein 1 OS=Mus musculus OX=10090 GN=Stub1 PE=1 SV=1	34.9	257441	69221.5	391878	207714	237661	481149	5.24456e+06	5.34108e+06	7.35062e+06	786232	884829	1620243
Q9QY76	Vesicle-associated membrane protein-associated protein B OS=Mus musculus OX=10090 GN=Vapb PE=1 SV=3	26.9	627837	731287	617834	4.94462e+06	2.9997e+06	2.60219e+06	1.36822e+06	1.35175e+06	956196	1.12386e+06	611527	563401
Q9DCS2	Methyltransferase-like 26 OS=Mus musculus OX=10090 GN=Mettl26 PE=1 SV=1	22.7				400797	475644	361703	115306	71074.4		151683	458941	223843
P62334	26S proteasome regulatory subunit 10B OS=Mus musculus OX=10090 GN=Psmc6 PE=1 SV=1	44.1	1.44289e+07	1.43805e+07	1.67152e+07	5.32498e+07	5.15508e+07	4.33978e+07	4.31036e+07	4.54831e+07	5.19283e+07	1.94687e+07	1.75074e+07	1.64664e+07
Q5U430	E3 ubiquitin-protein ligase UBR3 OS=Mus musculus OX=10090 GN=Ubr3 PE=1 SV=3	212.6							136201	328576	882153	129854	154464
Q80UY2	E3 ubiquitin-protein ligase KCMF1 OS=Mus musculus OX=10090 GN=Kcmf1 PE=1 SV=1	41.8	161143	569151	1.01625e+06	1.66726e+06	1.76736e+06	1.58703e+06	2.29631e+06	1.83867e+06	1.37809e+06	780570	753396	794626
P35290	Ras-related protein Rab-24 OS=Mus musculus OX=10090 GN=Rab24 PE=1 SV=2	23.1								223067	64659.4
Q9CQN1	Heat shock protein 75 kDa, mitochondrial OS=Mus musculus OX=10090 GN=Trap1 PE=1 SV=1	80.2	1.40016e+07	1.32246e+07	1.36452e+07	9.06884e+06	1.18748e+07	1.08999e+07	5.03074e+07	5.7437e+07	5.14605e+07	3.47484e+06	4.49318e+06	7.04899e+06
Q3UE37	Ubiquitin-conjugating enzyme E2 Z OS=Mus musculus OX=10090 GN=Ube2z PE=1 SV=2	38.3	300246	480794	482504	1.18404e+06	2.1353e+06	2.12132e+06	3.51095e+06	3.17139e+06	3.52505e+06	1.06428e+06	2.6697e+06	1.69385e+06
Q7TMM9	Tubulin beta-2A chain OS=Mus musculus OX=10090 GN=Tubb2a PE=1 SV=1	49.9	7.7723e+06	7.77064e+06	3.38271e+06	6.9041e+08	3.59465e+08	2.31683e+08	2.27569e+07	2.30624e+07	2.04083e+07	2.83571e+08	1.54253e+08	1.09511e+08
Q923D5	WW domain-binding protein 11 OS=Mus musculus OX=10090 GN=Wbp11 PE=1 SV=2	69.8	1.36687e+06	1.43866e+06	1.43643e+06	1.54279e+06	243407	1.51908e+06	3.15144e+06	3.2013e+06	1.78736e+06	118031	81957.3	597680
Q80U58	Pumilio homolog 2 OS=Mus musculus OX=10090 GN=Pum2 PE=1 SV=2	114.2							376820	359097	64720.3		67917.7	53438.2
Q8CIB5	Fermitin family homolog 2 OS=Mus musculus OX=10090 GN=Fermt2 PE=1 SV=1	77.8	3.63826e+06	3.25206e+06	4.10593e+06	5.47395e+06	7.31437e+06	6.24848e+06	1.63924e+07	1.73415e+07	1.49127e+07	4.36036e+06	2.16791e+06	3.66146e+06
P63085	Mitogen-activated protein kinase 1 OS=Mus musculus OX=10090 GN=Mapk1 PE=1 SV=3	41.2	1.75286e+07	1.56335e+07	1.24114e+07	4.99615e+07	6.56625e+07	4.06849e+07	6.90885e+07	8.91963e+07	5.19265e+07	3.02539e+07	3.16084e+07	2.0802e+07
P57780	Alpha-actinin-4 OS=Mus musculus OX=10090 GN=Actn4 PE=1 SV=1	104.9	2.95244e+07	3.02272e+07	5.1127e+07	1.02108e+08	1.06756e+08	9.32383e+07	7.75564e+07	8.54164e+07	1.36455e+08	2.7485e+07	3.19482e+07	3.62551e+07
P57759	Endoplasmic reticulum resident protein 29 OS=Mus musculus OX=10090 GN=Erp29 PE=1 SV=2	28.8	1.96702e+06	1.92726e+06	3.05987e+06	2.76985e+07	2.60616e+07	2.06826e+07	5.78279e+06	5.62156e+06	5.64042e+06	8.05782e+06	7.34308e+06	6.30366e+06
P21107	Tropomyosin alpha-3 chain OS=Mus musculus OX=10090 GN=Tpm3 PE=1 SV=3	33	5.94096e+06	5.40042e+06	5.51581e+06	2.6585e+07	2.9953e+07	1.96029e+07	1.52857e+07	7.23371e+06	1.35522e+07	7.93786e+06	6.65915e+06	3.9505e+06
Q9D9M2	Ubiquitin carboxyl-terminal hydrolase 12 OS=Mus musculus OX=10090 GN=Usp12 PE=2 SV=2	42.9	349619			283839	274237	71522	144625	320742		117867	142072
P22892	AP-1 complex subunit gamma-1 OS=Mus musculus OX=10090 GN=Ap1g1 PE=1 SV=3	91.3	3.44234e+06	2.78538e+06	1.87843e+06	2.46002e+07	2.13296e+07	2.39898e+07	1.0304e+07	1.13301e+07	8.00534e+06	1.09299e+07	7.91201e+06	1.1917e+07
P40630	Transcription factor A, mitochondrial OS=Mus musculus OX=10090 GN=Tfam PE=1 SV=2	28	1.20577e+06	1.08471e+06	449966	2.1442e+06	2693695	2.22834e+06	830603	937780	640297	173401	259312	382404
Q9CXK8	60S ribosome subunit biogenesis protein NIP7 homolog OS=Mus musculus OX=10090 GN=Nip7 PE=1 SV=1	20.4	1.40902e+06	1.54631e+06		102546	269196		1.41803e+06	1.10193e+06	410753	140387
P46061	Ran GTPase-activating protein 1 OS=Mus musculus OX=10090 GN=Rangap1 PE=1 SV=2	63.5	5.88287e+06	4.64536e+06	1.46102e+06	5.12685e+06	5.35489e+06	6.45307e+06	3.76422e+07	4.64745e+07	1.87719e+07	5.98679e+06	5.42901e+06	7.05138e+06
Q8K3C3	Protein LZIC OS=Mus musculus OX=10090 GN=Lzic PE=1 SV=1	21.5	521660	623939	921976	1.16248e+07	9.26477e+06	7.35857e+06	2.39613e+06	2.78483e+06	1.94186e+06	4.39183e+06	3.92457e+06	3.12179e+06
Q9D8M4	60S ribosomal protein L7-like 1 OS=Mus musculus OX=10090 GN=Rpl7l1 PE=1 SV=1	28.5							753191	648370	710603	129329	186876	98718
P20029	Endoplasmic reticulum chaperone BiP OS=Mus musculus OX=10090 GN=Hspa5 PE=1 SV=3	72.4	2.60244e+07	3.20418e+07	3.62449e+07	1.89557e+08	1.45859e+08	1.77628e+08	7.26817e+07	8.7061e+07	8.89409e+07	5.49366e+07	4.39625e+07	5.93645e+07
Q6P542	ATP-binding cassette sub-family F member 1 OS=Mus musculus OX=10090 GN=Abcf1 PE=1 SV=1	94.9	3.23912e+06	3.91588e+06	3.51922e+06	2.39876e+06	3.42122e+06	2.05146e+06	2.11596e+07	2.73064e+07	2.25759e+07	2.54724e+06	1.26713e+06	2.38884e+06
Q9CU65	Zinc finger MYM-type protein 2 OS=Mus musculus OX=10090 GN=Zmym2 PE=1 SV=3	154.5								335544	47879.6
Q9D0T2	Dual specificity protein phosphatase 12 OS=Mus musculus OX=10090 GN=Dusp12 PE=2 SV=1	37.1	46858.5	21675.8	82923.4				451672	150893	432374
Q99LB6	Methionine adenosyltransferase 2 subunit beta OS=Mus musculus OX=10090 GN=Mat2b PE=1 SV=1	37.4	5.12061e+06	5.60292e+06	7.08682e+06	9.21286e+06	1.18473e+07	1.25131e+07	1.80261e+07	2.33172e+07	2.03406e+07	3.16094e+06	4.81129e+06	5.87866e+06
P52480	Pyruvate kinase PKM OS=Mus musculus OX=10090 GN=Pkm PE=1 SV=4	57.8	3.28775e+08	3.48536e+08	4.42168e+08	1.57794e+09	1.73221e+09	1.61348e+09	8.36384e+08	9.22463e+08	9.80954e+08	4.53307e+08	4.83348e+08	4.67955e+08
P62242	40S ribosomal protein S8 OS=Mus musculus OX=10090 GN=Rps8 PE=1 SV=2	24.2	6.87314e+07	7.00949e+07	7.49913e+07	8.96498e+07	8.98751e+07	8.77186e+07	1.56628e+08	1.8009e+08	1.68783e+08	2.17419e+07	25148514	2.65071e+07
Q9Z2Z9	Glutamine--fructose-6-phosphate aminotransferase [isomerizing] 2 OS=Mus musculus OX=10090 GN=Gfpt2 PE=1 SV=3	77	5.47437e+06	6.67295e+06	6.82423e+06	2.27003e+06	3.47147e+06	2.88315e+06	2.97276e+07	3.3428e+07	2.94835e+07	1.39001e+06	2.36462e+06	1.26282e+06
Q9CYZ2	Tumor protein D54 OS=Mus musculus OX=10090 GN=Tpd52l2 PE=1 SV=1	24	3.17412e+06	3.33039e+06	3.38443e+06	1.13983e+07	1.41973e+07	1.16565e+07	1.51439e+07	1.70028e+07	1.74674e+07	6.75922e+06	7.44661e+06	7.30239e+06
P63101	14-3-3 protein zeta/delta OS=Mus musculus OX=10090 GN=Ywhaz PE=1 SV=1	27.8	8.12399e+07	7.00995e+07	7.81377e+07	7.06191e+08	6.1279e+08	4.91077e+08	2.32779e+08	2.295e+08	2.13662e+08	2.42133e+08	1.99269e+08	1.74746e+08
Q64727	Vinculin OS=Mus musculus OX=10090 GN=Vcl PE=1 SV=4	116.6	1.01384e+07	1.02779e+07	1.49678e+07	4.35324e+07	5.18413e+07	5.24406e+07	2.2993e+07	2.32317e+07	2.99077e+07	1.15403e+07	1.13901e+07	1.42584e+07
Q9D8C3	Putative bifunctional UDP-N-acetylglucosamine transferase and deubiquitinase ALG13 OS=Mus musculus OX=10090 GN=Alg13 PE=1 SV=2	128.6							41642.6	81605.1	113967
Q9WUP7	Ubiquitin carboxyl-terminal hydrolase isozyme L5 OS=Mus musculus OX=10090 GN=Uchl5 PE=1 SV=2	37.6	3.96304e+06	4.86194e+06	3.79633e+06	8.91236e+06	1.12759e+07	1.03616e+07	1.14504e+07	1.02687e+07	1.02319e+07	3.21892e+06	2.58574e+06	3.17376e+06
P46471	26S proteasome regulatory subunit 7 OS=Mus musculus OX=10090 GN=Psmc2 PE=1 SV=5	48.6	1.70005e+07	2.01591e+07	1.89739e+07	6.36477e+07	5.64424e+07	5.15972e+07	4.50325e+07	4.61796e+07	5.15742e+07	1.75373e+07	1.68708e+07	1.5895e+07
Q99P72	Reticulon-4 OS=Mus musculus OX=10090 GN=Rtn4 PE=1 SV=2	126.5	2.79539e+06	3.67367e+06	5.66769e+06	5.67575e+07	3.43647e+07	4.40012e+07	1.63861e+07	2.15014e+07	2.29901e+07	3.37039e+07	2.1514e+07	2.53191e+07
P30285	Cyclin-dependent kinase 4 OS=Mus musculus OX=10090 GN=Cdk4 PE=1 SV=1	33.7	133250	163676	99954.8	99013.1	1.47921e+06	1193894	6.54916e+06	7.13057e+06	7.54749e+06	1.95527e+06	4.8848e+06	4.5449e+06
Q571I9	Aldehyde dehydrogenase family 16 member A1 OS=Mus musculus OX=10090 GN=Aldh16a1 PE=1 SV=2	84.7	838824	1.67063e+06	2.63766e+06	1.78387e+06	2.88077e+06	1.29437e+06	6.29076e+06	6.72992e+06	7.62943e+06	924916	607360	1.57897e+06
P70697	Uroporphyrinogen decarboxylase OS=Mus musculus OX=10090 GN=Urod PE=1 SV=2	40.7	3.75271e+06	3.33529e+06	3.69961e+06	4.65389e+06	6.13387e+06	5.51277e+06	2.13243e+07	2.02226e+07	1.64836e+07	3.74107e+06	4.5082e+06	2.18385e+06
Q9CQ10	Charged multivesicular body protein 3 OS=Mus musculus OX=10090 GN=Chmp3 PE=1 SV=3	25.2	255306	213804	339081	778635	479429	458252	1.27528e+06	1.31279e+06	1.7428e+06	461206	306446	290765
Q93092	Transaldolase OS=Mus musculus OX=10090 GN=Taldo1 PE=1 SV=2	37.4	1.78413e+07	1.57176e+07	1.95825e+07	6.7792e+07	7.07881e+07	5.08864e+07	4.42378e+07	4.5894e+07	5.19996e+07	2.11391e+07	1.85821e+07	1.82006e+07
P24472	Glutathione S-transferase A4 OS=Mus musculus OX=10090 GN=Gsta4 PE=1 SV=3	25.5	1.69649e+07	2.70939e+07	1.42637e+07	3.56533e+07	5.46988e+07	3.43984e+07	5.67825e+07	5.56258e+07	6.15704e+07	1.35025e+07	1.66949e+07	1.34385e+07
O35405	Phospholipase D3 OS=Mus musculus OX=10090 GN=Pld3 PE=1 SV=1	54.4	461367			1.03944e+06	561489	923339	635428	547579	155890	1.1646e+06	882181	1.02941e+06
Q9Z0E0	Neurochondrin OS=Mus musculus OX=10090 GN=Ncdn PE=1 SV=1	78.8				371773		255369	899695	576169	473261	2.65725e+06	390602	556101
O88796	Ribonuclease P protein subunit p30 OS=Mus musculus OX=10090 GN=Rpp30 PE=1 SV=1	29.5	252929	283372	168917	155501	520581	386651	3.88344e+06	4.14073e+06	2.37968e+06	1.91817e+06	181435	431288
Q8CHP8	Glycerol-3-phosphate phosphatase OS=Mus musculus OX=10090 GN=Pgp PE=1 SV=1	34.5	1.06748e+06	1.31365e+06	1.29981e+06	8.7377e+06	7.73991e+06	7.44437e+06	4.95141e+06	7.08678e+06	5.46334e+06	7.61371e+06	3.75223e+06	2.80833e+06
P68040	Receptor of activated protein C kinase 1 OS=Mus musculus OX=10090 GN=Rack1 PE=1 SV=3	35.1	8.26819e+07	9.06983e+07	8.81349e+07	1.01529e+08	1.35965e+08	1.2872e+08	2.13116e+08	2.66213e+08	2.07742e+08	2.74484e+07	4.18952e+07	4.15298e+07
Q8BP47	Asparagine--tRNA ligase, cytoplasmic OS=Mus musculus OX=10090 GN=Nars PE=1 SV=2	64.2	1.46425e+07	1.35443e+07	1.98644e+07	2.95848e+07	3.2466e+07	3.00844e+07	4.61473e+07	4.99127e+07	6.11515e+07	1.17993e+07	1.25017e+07	1.05555e+07
Q7TNC4	Putative RNA-binding protein Luc7-like 2 OS=Mus musculus OX=10090 GN=Luc7l2 PE=1 SV=1	46.6	1.18217e+06	892256	714061	2.53559e+06	3.35523e+06	3.50397e+06	4.16401e+06	4.01455e+06	2.34084e+06	1.86377e+06	704049	1.7788e+06
P17742	Peptidyl-prolyl cis-trans isomerase A OS=Mus musculus OX=10090 GN=Ppia PE=1 SV=2	18	2.36505e+08	2.48554e+08	2.77327e+08	7.62497e+08	7.6947e+08	7.24843e+08	6.44443e+08	7.50385e+08	5.804e+08	2.388e+08	2.0995e+08	2.19975e+08
Q8C878	NEDD8-activating enzyme E1 catalytic subunit OS=Mus musculus OX=10090 GN=Uba3 PE=1 SV=2	51.7	2.68109e+06	3.49494e+06	4.99997e+06	1.19972e+07	9.54522e+06	1.10424e+07	7.47365e+06	1.03981e+07	1.10586e+07	6.36812e+06	2.71269e+06	2.01828e+06
O09172	Glutamate--cysteine ligase regulatory subunit OS=Mus musculus OX=10090 GN=Gclm PE=1 SV=1	30.5	767815	861821	773999	401241	508144	807857	3.44637e+06	4.04225e+06	4.40504e+06	639876	172363	268906
Q9D0J8	Parathymosin OS=Mus musculus OX=10090 GN=Ptms PE=1 SV=3	11.4	1.05262e+06	1.04316e+06	1.69709e+06	4.20514e+07	1.86245e+07	2.8788e+07	3.14623e+06	5.11758e+06	4.65445e+06	1.67618e+07	7.70314e+06	1.05325e+07
P00405	Cytochrome c oxidase subunit 2 OS=Mus musculus OX=10090 GN=Mtco2 PE=1 SV=1	26	7.19408e+06	8526747	6.22584e+06	3135813	3.13107e+06	3.64509e+06	27149737	30253671	1.82663e+07	2.09701e+06	1.39608e+06	720092
P47963	60S ribosomal protein L13 OS=Mus musculus OX=10090 GN=Rpl13 PE=1 SV=3	24.3	45852984	4.12361e+07	4.33121e+07	5.46862e+07	7.94384e+07	6.05752e+07	1.0406e+08	9.99143e+07	9.72131e+07	1.41229e+07	1.93475e+07	1.78211e+07
P61979	Heterogeneous nuclear ribonucleoprotein K OS=Mus musculus OX=10090 GN=Hnrnpk PE=1 SV=1	50.9	6.76349e+07	6.22964e+07	5.80749e+07	2.08218e+08	1.54168e+08	1.52781e+08	2.32996e+08	2.43201e+08	1.92447e+08	7.92707e+07	6.53595e+07	6.32328e+07
Q6ZWU9	40S ribosomal protein S27 OS=Mus musculus OX=10090 GN=Rps27 PE=1 SV=3	9.5	9.1755e+06	8.13223e+06	8.92565e+06	1.7153e+07	1.47653e+07	15391675	2.47737e+07	2.51306e+07	2.44219e+07	5.41857e+06	4.46498e+06	5.51346e+06
Q61316	Heat shock 70 kDa protein 4 OS=Mus musculus OX=10090 GN=Hspa4 PE=1 SV=1	94.1	8.79177e+07	8.74875e+07	1.07268e+08	1.99388e+08	1.73305e+08	1.81457e+08	2.61737e+08	3.05544e+08	2.95637e+08	7.0051e+07	6.37341e+07	6.01144e+07
P62264	40S ribosomal protein S14 OS=Mus musculus OX=10090 GN=Rps14 PE=1 SV=3	16.3	3.22661e+07	3.29022e+07	3.15541e+07	3.67433e+07	4.72712e+07	3.57721e+07	6.4346e+07	7.49608e+07	7.30414e+07	6.59632e+06	1.32688e+07	1.11121e+07
Q3V1H1	Cytoskeleton-associated protein 2 OS=Mus musculus OX=10090 GN=Ckap2 PE=1 SV=1	74							601678	470431		179195
Q61701	ELAV-like protein 4 OS=Mus musculus OX=10090 GN=Elavl4 PE=1 SV=1	42.3		490468	100898	6.43611e+06	3.31722e+06	3.9906e+06	557218	612383	830706	4.85671e+06	3.34143e+06	3.92139e+06
Q9ET26	E3 ubiquitin-protein ligase RNF114 OS=Mus musculus OX=10090 GN=Rnf114 PE=1 SV=2	25.7	246205	254659	250091	1.75918e+06	2.04857e+06	1.94518e+06	1.73917e+06	2.58285e+06	3.14223e+06	2.01678e+06	1.9187e+06	2.41648e+06
P48962	ADP/ATP translocase 1 OS=Mus musculus OX=10090 GN=Slc25a4 PE=1 SV=4	32.9	3.68125e+06	2.51471e+06	3.08406e+06	1.69507e+07	9.3004e+06	1.06294e+07	8.79724e+06	7.7482e+06	8.73604e+06	5.08138e+06	2.76658e+06	3.68202e+06
P46978	Dolichyl-diphosphooligosaccharide--protein glycosyltransferase subunit STT3A OS=Mus musculus OX=10090 GN=Stt3a PE=1 SV=1	80.5	1.29198e+06	835623	1.56663e+06	3.29429e+06	2.46417e+06	2.10213e+06	5.2062e+06	4.69134e+06	6.47257e+06	1.16065e+06	1.71699e+06	1.18484e+06
Q99MD9	Nuclear autoantigenic sperm protein OS=Mus musculus OX=10090 GN=Nasp PE=1 SV=2	83.9	4.66081e+07	4.48159e+07	4.87777e+07	5.73202e+07	8.89282e+07	8.56294e+07	1.50176e+08	1.69412e+08	1.70074e+08	2.73707e+07	3.51895e+07	2.84559e+07
P06151	L-lactate dehydrogenase A chain OS=Mus musculus OX=10090 GN=Ldha PE=1 SV=3	36.5	1.42456e+08	1.31432e+08	1.63059e+08	1.35964e+09	1.57392e+09	1.5589e+09	3.00261e+08	3.0517e+08	3.24285e+08	3.34011e+08	3.76535e+08	3.81669e+08
P35564	Calnexin OS=Mus musculus OX=10090 GN=Canx PE=1 SV=1	67.2	2.50897e+07	2.35524e+07	2.96819e+07	8.83386e+07	7.6463e+07	7.62396e+07	7.25123e+07	7.7968e+07	8.08707e+07	3.19831e+07	2.32031e+07	2.66792e+07
Q9Z1G4	V-type proton ATPase 116 kDa subunit a isoform 1 OS=Mus musculus OX=10090 GN=Atp6v0a1 PE=1 SV=3	96.4			64894.4	5.59107e+06	3.0611e+06	2.42142e+06		77338.5	56686.1	1.91555e+06	544874	697256
P62082	40S ribosomal protein S7 OS=Mus musculus OX=10090 GN=Rps7 PE=2 SV=1	22.1	6.01563e+07	5.74769e+07	6.90617e+07	5.95026e+07	7.73366e+07	6.94189e+07	1.37852e+08	1.46474e+08	160733122	1.57724e+07	2.044e+07	1.97925e+07
P14131	40S ribosomal protein S16 OS=Mus musculus OX=10090 GN=Rps16 PE=1 SV=4	16.4	3.67371e+07	3.53873e+07	4.42454e+07	3.5434e+07	6.00743e+07	5.41051e+07	8.55105e+07	9.35156e+07	1.02536e+08	8.78828e+06	1.80383e+07	1.52052e+07
P97461	40S ribosomal protein S5 OS=Mus musculus OX=10090 GN=Rps5 PE=1 SV=3	22.9	7.47064e+07	5.02239e+07	9.10112e+07	5.98566e+07	8.19489e+07	9.23878e+07	1.48984e+08	1.14552e+08	1.79879e+08	1.23179e+07	2.06389e+07	2.32749e+07
Q9DBJ1	Phosphoglycerate mutase 1 OS=Mus musculus OX=10090 GN=Pgam1 PE=1 SV=3	28.8	1.14786e+08	1.22304e+08	1.29494e+08	9.9531e+08	1.16721e+09	8.32325e+08	3.12353e+08	3.55792e+08	3.04921e+08	3.14637e+08	3.26807e+08	2.54465e+08
Q61496	ATP-dependent RNA helicase DDX4 OS=Mus musculus OX=10090 GN=Ddx4 PE=1 SV=2	76.4							49360.9	119360	57431.8
P62962	Profilin-1 OS=Mus musculus OX=10090 GN=Pfn1 PE=1 SV=2	14.9	3.61545e+07	3.51643e+07	4.76345e+07	1.55223e+08	1.40853e+08	1.68732e+08	1.12192e+08	1.27351e+08	1.44991e+08	6.04252e+07	4.99418e+07	6.06542e+07
Q9CZ44	NSFL1 cofactor p47 OS=Mus musculus OX=10090 GN=Nsfl1c PE=1 SV=1	40.7	6.45252e+06	6.86404e+06	9.63547e+06	4.51319e+07	3.6332e+07	4.46841e+07	1.90523e+07	2.39436e+07	2.60493e+07	1.62389e+07	1.21195e+07	1.50122e+07
P63073	Eukaryotic translation initiation factor 4E OS=Mus musculus OX=10090 GN=Eif4e PE=1 SV=1	25	3.07234e+06	3.24291e+06	2.76405e+06	1.06619e+07	1.3741e+07	1.15087e+07	1.14593e+07	1.02731e+07	9.65363e+06	4.50492e+06	4.93972e+06	4.5222e+06
Q11011	Puromycin-sensitive aminopeptidase OS=Mus musculus OX=10090 GN=Npepps PE=1 SV=2	103.3	1.20795e+07	1.07192e+07	1.32714e+07	1.22469e+08	1.07309e+08	8.62472e+07	4.4846e+07	4.50284e+07	4.81301e+07	5.42387e+07	4.3281e+07	3.9421e+07
P62900	60S ribosomal protein L31 OS=Mus musculus OX=10090 GN=Rpl31 PE=1 SV=1	14.5	3.81849e+07	3.69046e+07	3.44403e+07	3.68464e+07	3.68515e+07	3.20709e+07	8.28067e+07	9.65514e+07	8.03414e+07	9.06235e+06	1.00199e+07	9.13604e+06
Q00493	Carboxypeptidase E OS=Mus musculus OX=10090 GN=Cpe PE=1 SV=2	53.2	140287			8.26427e+06	8.84726e+06	4.1102e+06	500336	354139	419637	1.71331e+07	1.58717e+07	8.41459e+06
Q9QZD9	Eukaryotic translation initiation factor 3 subunit I OS=Mus musculus OX=10090 GN=Eif3i PE=1 SV=1	36.4	1.00074e+07	8.30418e+06	1.07651e+07	1.44615e+07	1.84814e+07	1.67349e+07	3.22751e+07	3.54004e+07	3.6527e+07	6.05192e+06	5.86251e+06	8.45977e+06
P0C027	Diphosphoinositol polyphosphate phosphohydrolase 3-alpha OS=Mus musculus OX=10090 GN=Nudt10 PE=1 SV=1	18.6	303893	67621.4	147398	4.23495e+06	3.10779e+06	2.57891e+06	893861	679188	834959	3.48169e+06	1.15082e+06	2.03156e+06
Q8K212	Phosphofurin acidic cluster sorting protein 1 OS=Mus musculus OX=10090 GN=Pacs1 PE=1 SV=2	104.8	362008	185374	97046.6	6.23024e+06	6.53071e+06	4.87074e+06	244554	628886	580476	2.47917e+06	1.48255e+06	1.05913e+06
P27659	60S ribosomal protein L3 OS=Mus musculus OX=10090 GN=Rpl3 PE=1 SV=3	46.1	9.13123e+07	7.83638e+07	7.66511e+07	7.83715e+07	1.01243e+08	8.36899e+07	1.74509e+08	1.96618e+08	1.52711e+08	1.5658e+07	2.39583e+07	2.42123e+07
P47911	60S ribosomal protein L6 OS=Mus musculus OX=10090 GN=Rpl6 PE=1 SV=3	33.5	6.07886e+07	6.01993e+07	6.02665e+07	7.07287e+07	7.84618e+07	7.58111e+07	1.61793e+08	1.70903e+08	1.58932e+08	2.16094e+07	2.19021e+07	2.53344e+07
Q5SWU9	Acetyl-CoA carboxylase 1 OS=Mus musculus OX=10090 GN=Acaca PE=1 SV=1	265.1	6.33278e+06	1.66055e+06	2.94146e+06	11805886	1.03009e+07	1.13433e+07	1.40606e+07	1.59762e+07	1.48521e+07	4.04657e+06	5.47982e+06	9.58114e+06
Q9D6R2	Isocitrate dehydrogenase [NAD] subunit alpha, mitochondrial OS=Mus musculus OX=10090 GN=Idh3a PE=1 SV=1	39.6	8.254e+06	1.04849e+07	1.05055e+07	1.87744e+07	2.12309e+07	1.22426e+07	2.50451e+07	2.87808e+07	2.3207e+07	5.80759e+06	5.57013e+06	3.96318e+06
Q9JII5	DAZ-associated protein 1 OS=Mus musculus OX=10090 GN=Dazap1 PE=1 SV=2	43.2	4.46033e+06	5.38974e+06	4.98248e+06	6.91319e+06	3.84753e+06	4.11591e+06	2.83956e+07	3.27842e+07	2.73067e+07	3.3161e+06	1.79771e+06	5.56417e+06
P48428	Tubulin-specific chaperone A OS=Mus musculus OX=10090 GN=Tbca PE=1 SV=3	12.8	1.89485e+06	1.53397e+06	2.9641e+06	1.16012e+07	1.24386e+07	1.53669e+07	8.4237e+06	8.36529e+06	1.14204e+07	6.18309e+06	5.67816e+06	8.40882e+06
Q8BZM1	Glomulin OS=Mus musculus OX=10090 GN=Glmn PE=1 SV=1	67.7	205963	136666	161778	1.15418e+06	1.55857e+06	779592	666951	558455	813683	606715	895343	244702
Q9CXW4	60S ribosomal protein L11 OS=Mus musculus OX=10090 GN=Rpl11 PE=1 SV=4	20.2	2.48409e+07	2.50289e+07	2.75663e+07	2.53665e+07	3.41e+07	3.19911e+07	6.27774e+07	6.43102e+07	6.81447e+07	6.20754e+06	9.96862e+06	1.01659e+07
Q6ZQH8	Nucleoporin NUP188 homolog OS=Mus musculus OX=10090 GN=Nup188 PE=1 SV=2	196.6	881202	964320	111366	621612	517117	327608	6.80368e+06	8.79097e+06	2.99057e+06	298248	772455	1.22244e+06
P26443	Glutamate dehydrogenase 1, mitochondrial OS=Mus musculus OX=10090 GN=Glud1 PE=1 SV=1	61.3	4.03182e+07	3.41669e+07	3.51744e+07	5.03171e+07	3.76834e+07	3.28435e+07	7.85253e+07	7.78945e+07	7.23154e+07	1.43721e+07	8.01436e+06	6.96857e+06
Q9ERK4	Exportin-2 OS=Mus musculus OX=10090 GN=Cse1l PE=1 SV=1	110.4	4.9651e+07	4.41157e+07	5.15459e+07	8.22288e+07	1.01515e+08	7.46356e+07	1.27124e+08	1.3341e+08	1.47998e+08	2.59466e+07	3.05905e+07	2.46306e+07
P24369	Peptidyl-prolyl cis-trans isomerase B OS=Mus musculus OX=10090 GN=Ppib PE=1 SV=2	23.7	5.25648e+06	4.75729e+06	5.03731e+06	3.70144e+07	3.39941e+07	2.7138e+07	1.36592e+07	1.44264e+07	1.22391e+07	1.14562e+07	8.47717e+06	9.48597e+06
P09103	Protein disulfide-isomerase OS=Mus musculus OX=10090 GN=P4hb PE=1 SV=2	57	2.3119e+07	2.09944e+07	27324619	1.90204e+08	1.85395e+08	1.66958e+08	6.55449e+07	7.01322e+07	7.17378e+07	6.12616e+07	5.61731e+07	5.9837e+07
Q8BGS1	Band 4.1-like protein 5 OS=Mus musculus OX=10090 GN=Epb41l5 PE=1 SV=1	81.6	60030.1					79553.6	656185	491844	574827	273569		282110
Q9D8L5	Coiled-coil domain-containing protein 91 OS=Mus musculus OX=10090 GN=Ccdc91 PE=1 SV=2	50	1.99224e+06	1.34803e+06	2.29292e+06	12322358	6527230	10937960
Q99JI6	Ras-related protein Rap-1b OS=Mus musculus OX=10090 GN=Rap1b PE=1 SV=2	20.8	3.79296e+06	3.21923e+06	4.57864e+06	7.83229e+06	8.91046e+06	6.11201e+06	1.87363e+07	1.13501e+07	1.34317e+07	2.2228e+06	3.11362e+06	4.41041e+06
P02802	Metallothionein-1 OS=Mus musculus OX=10090 GN=Mt1 PE=1 SV=1	6	1.07152e+06	336469	872712	1.64124e+06	600706	685022	5.94804e+06	2.75614e+06	5.34972e+06	1.1931e+06	411345	536227
Q8BMS1	Trifunctional enzyme subunit alpha, mitochondrial OS=Mus musculus OX=10090 GN=Hadha PE=1 SV=1	82.6	8.30226e+06	7.21949e+06	5.36576e+06	1.11612e+07	1.34281e+07	1.2453e+07	3.3413e+07	3.34978e+07	2.49817e+07	5.47863e+06	4.67698e+06	8.84736e+06
O35382	Exocyst complex component 4 OS=Mus musculus OX=10090 GN=Exoc4 PE=1 SV=2	110.5	675826	1.20629e+06	71113.4	2.33913e+06	1.05487e+06	1.25164e+06	3.91932e+06	2.64294e+06	3.63686e+06	1.23165e+06	1.27725e+06	1.78208e+06
Q91WQ3	Tyrosine--tRNA ligase, cytoplasmic OS=Mus musculus OX=10090 GN=Yars PE=1 SV=3	59.1	1.35855e+07	1.40574e+07	1.83013e+07	3.72844e+07	4.63765e+07	4.27933e+07	4.49585e+07	5.12818e+07	6.02809e+07	1.96593e+07	1.39382e+07	1.49813e+07
Q9QUR7	Peptidyl-prolyl cis-trans isomerase NIMA-interacting 1 OS=Mus musculus OX=10090 GN=Pin1 PE=1 SV=1	18.4	2.38401e+06	2.12684e+06	2.82645e+06	2.89114e+06	2.30961e+06	2.9694e+06	1.03818e+07	1.2897e+07	1.22891e+07	1.47308e+06	1.49973e+06	1.43669e+06
Q6P4T2	U5 small nuclear ribonucleoprotein 200 kDa helicase OS=Mus musculus OX=10090 GN=Snrnp200 PE=1 SV=1	244.4	1.05071e+07	8.75228e+06	4.18099e+06	7.80285e+06	7.28477e+06	8.61754e+06	4.71944e+07	5.18527e+07	1.75248e+07	3.09605e+06	3.32934e+06	7.37515e+06
Q62351	Transferrin receptor protein 1 OS=Mus musculus OX=10090 GN=Tfrc PE=1 SV=1	85.7	5.59314e+06	4.75185e+06	6.99991e+06	2.22625e+07	1.1617e+07	1.33852e+07	1.59158e+07	1.81421e+07	2.22591e+07	6.80881e+06	3.33914e+06	7.31683e+06
O88456	Calpain small subunit 1 OS=Mus musculus OX=10090 GN=Capns1 PE=1 SV=1	28.4	1.74239e+06	713873	941980	4.7498e+06	5.85963e+06	3.84494e+06	6.60027e+06	3.69975e+06	3.91347e+06	2.37683e+06	2.38431e+06	2.13891e+06
Q8BMK4	Cytoskeleton-associated protein 4 OS=Mus musculus OX=10090 GN=Ckap4 PE=1 SV=2	63.7	1.35611e+07	1.18928e+07	1.25679e+07	2.25278e+07	1.79557e+07	1.76754e+07	3.89865e+07	4.33111e+07	3.47532e+07	6.85877e+06	5.36538e+06	7.79539e+06
Q9CRB9	MICOS complex subunit Mic19 OS=Mus musculus OX=10090 GN=Chchd3 PE=1 SV=1	26.3	650622	467600	307964	360466	170219	79444.8	3.17285e+06	2.95856e+06	2.53605e+06	728424		202893
Q8BHB4	WD repeat-containing protein 3 OS=Mus musculus OX=10090 GN=Wdr3 PE=1 SV=1	105.7							91654.5	217310
P58404	Striatin-4 OS=Mus musculus OX=10090 GN=Strn4 PE=1 SV=2	81.6	273095		242125	1.3622e+06	869675	739033	686708	1.28208e+06	678891	1.313e+06	927832	861943
P48758	Carbonyl reductase [NADPH] 1 OS=Mus musculus OX=10090 GN=Cbr1 PE=1 SV=3	30.6	4.80894e+06	4.5016e+06	5.98789e+06	3.34907e+07	3.35486e+07	2.39489e+07	1.97649e+07	2.12439e+07	1.92788e+07	1.68823e+07	1.21039e+07	1.12463e+07
P62830	60S ribosomal protein L23 OS=Mus musculus OX=10090 GN=Rpl23 PE=1 SV=1	14.9	3.4398e+07	2.79555e+07	4.21926e+07	3.42853e+07	39484113	4.15887e+07	7.72365e+07	7.12238e+07	1.16794e+08	8.89031e+06	1.03502e+07	1.32134e+07
Q9JKB1	Ubiquitin carboxyl-terminal hydrolase isozyme L3 OS=Mus musculus OX=10090 GN=Uchl3 PE=1 SV=2	26.1	1.50949e+07	1.61384e+07	1.84909e+07	6.36751e+07	3.30499e+07	3.19038e+07	5.05632e+07	6.28353e+07	5.42672e+07	2.28521e+07	1.2172e+07	1.25635e+07
P80314	T-complex protein 1 subunit beta OS=Mus musculus OX=10090 GN=Cct2 PE=1 SV=4	57.4	7.69105e+07	8.45362e+07	7.5961e+07	2.15875e+08	2.03175e+08	1.79157e+08	2.14565e+08	2.58209e+08	2.25998e+08	6.78532e+07	6.59512e+07	6.0513e+07
P62911	60S ribosomal protein L32 OS=Mus musculus OX=10090 GN=Rpl32 PE=1 SV=2	15.9	19184430	1.66604e+07	1.9173e+07	1.52563e+07	3.43264e+07	2.45008e+07	39717717	4.75366e+07	4.41301e+07	3.85525e+06	8.40812e+06	7.30267e+06
P18653	Ribosomal protein S6 kinase alpha-1 OS=Mus musculus OX=10090 GN=Rps6ka1 PE=1 SV=1	81.5	1.02399e+07	6.26681e+06	5.15708e+06	4.50095e+06	5.70259e+06	4.45707e+06	3.39116e+07	2.70779e+07	2.1878e+07	2.40476e+06	2.73976e+06	1.42913e+06
P36916	Guanine nucleotide-binding protein-like 1 OS=Mus musculus OX=10090 GN=Gnl1 PE=1 SV=4	68.7	2.20867e+06	2.24608e+06	2.55396e+06	4.16854e+06	7.09501e+06	5.92638e+06	6.78523e+06	6.89182e+06	6.97975e+06	1.93017e+06	1.7385e+06	1.81762e+06
P14152	Malate dehydrogenase, cytoplasmic OS=Mus musculus OX=10090 GN=Mdh1 PE=1 SV=3	36.5	1.23871e+07	8.77073e+06	1.37702e+07	1.58532e+08	1.28318e+08	1.27404e+08	3.4785e+07	3.17214e+07	3.74872e+07	4.94855e+07	4.29705e+07	4.5477e+07
Q8BZA9	Fructose-2,6-bisphosphatase TIGAR OS=Mus musculus OX=10090 GN=Tigar PE=1 SV=1	29.2	3.5275e+06	3.91938e+06	2.90773e+06	3.23766e+06	4.35112e+06	1.85055e+06	1.55769e+07	1.30355e+07	9.32488e+06	1.94488e+06	1.10549e+06	770204
Q501J6	Probable ATP-dependent RNA helicase DDX17 OS=Mus musculus OX=10090 GN=Ddx17 PE=1 SV=1	72.4	3.84393e+06	3.2732e+06	3.03953e+06	9.09758e+06	1.01028e+07	1.09022e+07	1.7182e+07	2.05794e+07	1.46966e+07	5.35345e+06	5.7119e+06	5.99006e+06
Q7TSI3	Serine/threonine-protein phosphatase 6 regulatory subunit 1 OS=Mus musculus OX=10090 GN=Ppp6r1 PE=1 SV=1	94.5	416763		467371	623915	1.22013e+06	519248	2.26393e+06	832645	1.60819e+06	636593	2.7592e+06	401915
P60229	Eukaryotic translation initiation factor 3 subunit E OS=Mus musculus OX=10090 GN=Eif3e PE=1 SV=1	52.2	1.3918e+07	1.29565e+07	1.45334e+07	2.16712e+07	2.76144e+07	2.36703e+07	4.61797e+07	5.06292e+07	4.56812e+07	8.2019e+06	1.2042e+07	7.83077e+06
A2ADY9	Protein DDI1 homolog 2 OS=Mus musculus OX=10090 GN=Ddi2 PE=1 SV=1	44.6	828719	710705	1.10761e+06	2.2047e+06	2.49096e+06	1.80578e+06	3.27059e+06	4.7354e+06	4.52538e+06	1.27736e+06	1.20931e+06	922839
P11983	T-complex protein 1 subunit alpha OS=Mus musculus OX=10090 GN=Tcp1 PE=1 SV=3	60.4	6.57982e+07	5.73423e+07	6.40203e+07	1.69903e+08	1.49615e+08	1.51196e+08	1.74609e+08	1.86297e+08	1.79844e+08	5.67729e+07	4.49789e+07	4.85085e+07
P31786	Acyl-CoA-binding protein OS=Mus musculus OX=10090 GN=Dbi PE=1 SV=2	10	2.80967e+06	2.0862e+06	4507967	5.05561e+07	3.31996e+07	4.03623e+07	8441305	8.01393e+06	1.27284e+07	2.14599e+07	9.44384e+06	1.44391e+07
Q9Z2Y8	Pyridoxal phosphate homeostasis protein OS=Mus musculus OX=10090 GN=Plpbp PE=1 SV=1	30	3.22172e+06	3.29817e+06	887970	6.52156e+06	1.15985e+07	2.91133e+06	7.35506e+06	8.42398e+06	2.6767e+06	1.96202e+06	3.64688e+06	716372
P70404	Isocitrate dehydrogenase [NAD] subunit gamma 1, mitochondrial OS=Mus musculus OX=10090 GN=Idh3g PE=1 SV=1	42.8	1.42081e+06	462779	802000	2.11722e+06	2.03017e+06	1.80836e+06	7.25991e+06	7.54195e+06	8.73002e+06	1.50284e+06	5.05578e+06	1.22121e+06
Q9CR29	Coiled-coil domain-containing protein 43 OS=Mus musculus OX=10090 GN=Ccdc43 PE=1 SV=1	25	650005	301109	513648	438107	304208	407604	766845		591960			43996.5
P42208	Septin-2 OS=Mus musculus OX=10090 GN=Sept2 PE=1 SV=2	41.5	3.7968e+06	4.12856e+06	7.62492e+06	3.44314e+07	3.08445e+07	3.32814e+07	2.05892e+07	2.39635e+07	2.16921e+07	1.60689e+07	1.46349e+07	1.76974e+07
P62983	Ubiquitin-40S ribosomal protein S27a OS=Mus musculus OX=10090 GN=Rps27a PE=1 SV=2	17.9	3.61505e+07	3.50778e+07	4.56858e+07	3.23691e+08	2.74221e+08	279992295	2.5409e+08	2.65615e+08	2.99915e+08	2.5279e+08	2.02589e+08	2.22927e+08
Q8K1M6	Dynamin-1-like protein OS=Mus musculus OX=10090 GN=Dnm1l PE=1 SV=2	82.6	5.96484e+06	8.37015e+06	6.40617e+06	4.70965e+07	3.40049e+07	2.64179e+07	2.59167e+07	2.80031e+07	2.85728e+07	2.34108e+07	1.39434e+07	1.10095e+07
Q920E5	Farnesyl pyrophosphate synthase OS=Mus musculus OX=10090 GN=Fdps PE=1 SV=1	40.6	9.85008e+06	1.1277e+07	1.44065e+07	8.87663e+07	1.04762e+08	8.39644e+07	4.05352e+07	3.88483e+07	4.07946e+07	3.60051e+07	3.81567e+07	2.98787e+07
Q8JZN7	Mitochondrial Rho GTPase 2 OS=Mus musculus OX=10090 GN=Rhot2 PE=1 SV=1	69							160747		110984
Q8R010	Aminoacyl tRNA synthase complex-interacting multifunctional protein 2 OS=Mus musculus OX=10090 GN=Aimp2 PE=1 SV=2	35.4	8.13953e+06	4.94949e+06	9.47312e+06	1.38818e+07	1.78363e+07	1.50717e+07	1.367e+07	1.2738e+07	1.52068e+07	2.1072e+06	3.65322e+06	4.39398e+06
Q8CI94	Glycogen phosphorylase, brain form OS=Mus musculus OX=10090 GN=Pygb PE=1 SV=3	96.7	783997	743966	637337	4.88514e+07	4.58683e+07	3.72865e+07	2.02575e+06	3.34864e+06	2.75256e+06	2.52288e+07	1.48343e+07	1.46352e+07
Q8BJ03	Cytochrome c oxidase assembly protein COX15 homolog OS=Mus musculus OX=10090 GN=Cox15 PE=1 SV=1	45.8	561523	405487	1.36192e+06	116794	79016.6	824541	1.96742e+06	1.93808e+06	1.60495e+06	138800		108233
P17225	Polypyrimidine tract-binding protein 1 OS=Mus musculus OX=10090 GN=Ptbp1 PE=1 SV=2	56.4	7.72682e+07	8.92471e+07	6.78144e+07	5.24623e+07	7.93877e+07	5.78821e+07	2.18164e+08	2.70383e+08	1.58953e+08	1.41828e+07	2.47304e+07	1.79663e+07
Q06185	ATP synthase subunit e, mitochondrial OS=Mus musculus OX=10090 GN=Atp5me PE=1 SV=2	8.2	2.09342e+06	1.74087e+06	2.66797e+06	2.32495e+06	1.5863e+06	1.70438e+06	5.26838e+06	5.38575e+06	6.93596e+06	605592	364504	751184
Q9JHE7	Protein TSSC4 OS=Mus musculus OX=10090 GN=Tssc4 PE=1 SV=1	33.5							407980	452055	431068	105015		213062
P56399	Ubiquitin carboxyl-terminal hydrolase 5 OS=Mus musculus OX=10090 GN=Usp5 PE=1 SV=1	95.8	2.83885e+07	2.9777e+07	3.54309e+07	1.902e+08	1.57856e+08	1.39592e+08	6.99712e+07	7.64725e+07	8.19996e+07	5.83053e+07	3.41468e+07	3.99619e+07
P42932	T-complex protein 1 subunit theta OS=Mus musculus OX=10090 GN=Cct8 PE=1 SV=3	59.5	1.23459e+08	8.8469e+07	1.40206e+08	3.99398e+08	2.16358e+08	2.64822e+08	1.86029e+08	2.21014e+08	2.05128e+08	6.09672e+07	4.9395e+07	5.4116e+07
P62192	26S proteasome regulatory subunit 4 OS=Mus musculus OX=10090 GN=Psmc1 PE=1 SV=1	49.2	1.56354e+07	1.15434e+07	1.55661e+07	4.81225e+07	4.51173e+07	3.65259e+07	4.70675e+07	5.07851e+07	3.95594e+07	1.62049e+07	1.38938e+07	1.52406e+07
P70698	CTP synthase 1 OS=Mus musculus OX=10090 GN=Ctps1 PE=1 SV=2	66.6	7.79188e+06	7.93722e+06	7.76251e+06	8.6791e+06	1.29792e+07	1.25813e+07	2.5296e+07	3.19322e+07	2.75993e+07	4.44415e+06	3.94041e+06	4.82955e+06
P97351	40S ribosomal protein S3a OS=Mus musculus OX=10090 GN=Rps3a PE=1 SV=3	29.9	6.88372e+07	5.4536e+07	6.30743e+07	7.43545e+07	9.88079e+07	9.15449e+07	1.47004e+08	1.38907e+08	1.4156e+08	1.90081e+07	2.27976e+07	2.43089e+07
Q8C0J2	Autophagy-related protein 16-1 OS=Mus musculus OX=10090 GN=Atg16l1 PE=1 SV=1	68.1					63540.9		182871	230645	237166	120375		133101
Q9ES00	Ubiquitin conjugation factor E4 B OS=Mus musculus OX=10090 GN=Ube4b PE=1 SV=3	133.2	2.15903e+06	842559	953991	2.31419e+07	3.08797e+06	2.13555e+06	1.34903e+07	1.51709e+07	1.33439e+07	8.03038e+06	6.79174e+06	5.62158e+06
Q9CRT8	Exportin-T OS=Mus musculus OX=10090 GN=Xpot PE=1 SV=3	109.7	2.03573e+06	4.42466e+06	3.49861e+06	3.30475e+06	4.12786e+06	3.5466e+06	1.62537e+07	1.6089e+07	1.23291e+07	1.75e+06	2.69348e+06	1.34054e+06
Q61879	Myosin-10 OS=Mus musculus OX=10090 GN=Myh10 PE=1 SV=2	228.9	1.63456e+07	6.79073e+06	6.4739e+06	2.0611e+08	2.13967e+08	1.90008e+08	2.61864e+07	2.64369e+07	2.10312e+07	6.519e+07	5.40946e+07	6.1335e+07
P58021	Transmembrane 9 superfamily member 2 OS=Mus musculus OX=10090 GN=Tm9sf2 PE=1 SV=1	75.3	1.93368e+06	1.29071e+06	1.94889e+06	5.36581e+06	1.99604e+06	5.66104e+06	1.4605e+07	1.92444e+07	1.57541e+07	5.69569e+06	1.92407e+06	6.40978e+06
O88487	Cytoplasmic dynein 1 intermediate chain 2 OS=Mus musculus OX=10090 GN=Dync1i2 PE=1 SV=1	68.4	1.91517e+06	1.48275e+06	3.25311e+06	3.76702e+07	2.07136e+07	2.37534e+07	8.36015e+06	7.35577e+06	6.87823e+06	1.19517e+07	8.49995e+06	1.06238e+07
Q9D8N0	Elongation factor 1-gamma OS=Mus musculus OX=10090 GN=Eef1g PE=1 SV=3	50	9.96819e+07	9.26437e+07	9.70256e+07	1.81787e+08	2.04795e+08	1.55188e+08	2.72946e+08	2.94161e+08	2.83992e+08	5.36883e+07	6.54851e+07	5.31773e+07
Q6PDG5	SWI/SNF complex subunit SMARCC2 OS=Mus musculus OX=10090 GN=Smarcc2 PE=1 SV=2	132.5	195887		99421.4	1.01879e+07	7.25505e+06	4.70814e+06	548695		694129	3.528e+06	2.90848e+06	1.84083e+06
O88844	Isocitrate dehydrogenase [NADP] cytoplasmic OS=Mus musculus OX=10090 GN=Idh1 PE=1 SV=2	46.6	9.8553e+06	6.80915e+06	1.2803e+07	3.50957e+08	2.50494e+08	1.94372e+08	3.17903e+07	2.84476e+07	2.77919e+07	1.12821e+08	7.67067e+07	7.33862e+07
Q3U0V1	Far upstream element-binding protein 2 OS=Mus musculus OX=10090 GN=Khsrp PE=1 SV=2	76.7	1.02909e+07	1.17298e+07	1.30426e+07	3.89346e+07	2.66834e+07	3.01697e+07	4.29784e+07	5.00287e+07	4.53786e+07	1.63439e+07	1.09788e+07	1.37097e+07
P25206	DNA replication licensing factor MCM3 OS=Mus musculus OX=10090 GN=Mcm3 PE=1 SV=2	91.5	2.66074e+07	2.1954e+07	2.39759e+07	8.65342e+06	1.80374e+07	1.71489e+07	1.13049e+08	1.28165e+08	1.16537e+08	4.88231e+06	9.03209e+06	9.26356e+06
Q62446	Peptidyl-prolyl cis-trans isomerase FKBP3 OS=Mus musculus OX=10090 GN=Fkbp3 PE=1 SV=2	25.1	7.56412e+06	8.28398e+06	9.67341e+06	2.69217e+07	3.41029e+07	3.43517e+07	1.88445e+07	2.26945e+07	2.56707e+07	8.38295e+06	7.8903e+06	1.08994e+07
Q8K310	Matrin-3 OS=Mus musculus OX=10090 GN=Matr3 PE=1 SV=1	94.6	1.11718e+07	1.32304e+07	1.65919e+06	1.4419e+07	8.50384e+06	1.23131e+07	3.09946e+07	4.2875e+07	5.28037e+06	5.55563e+06	2.52233e+06	3.89042e+06
Q9Z1K5	E3 ubiquitin-protein ligase ARIH1 OS=Mus musculus OX=10090 GN=Arih1 PE=1 SV=3	64	70883.2	108030	81802.3	736065	388420	421174	1.38019e+06	1.71578e+06	1.31141e+06	1.22199e+06	811367	759631
P61514	60S ribosomal protein L37a OS=Mus musculus OX=10090 GN=Rpl37a PE=1 SV=2	10.3	1.37672e+07	1.15838e+07	1.32371e+07	1.52618e+07	1.17543e+07	1.54149e+07	3.38028e+07	3.35582e+07	3.52193e+07	4.09282e+06	3.14339e+06	5.10401e+06
Q148V7	RAB11-binding protein RELCH OS=Mus musculus OX=10090 GN=Relch PE=1 SV=1	134.5	388381	149813	395606	3.93153e+06	869327	1.37125e+06	1.41096e+06	212034	1.23728e+06	1.65166e+06	97405.9	587244
B1AY10	Transcriptional repressor NF-X1 OS=Mus musculus OX=10090 GN=Nfx1 PE=1 SV=1	123.7								128705	134393
Q60838	Segment polarity protein dishevelled homolog DVL-2 OS=Mus musculus OX=10090 GN=Dvl2 PE=1 SV=2	78.8	240656	342034	133658	179584	636586	1.85456e+06	2.51696e+06	1.20454e+06	2.40072e+06	298545	765711	767936
Q9CZM2	60S ribosomal protein L15 OS=Mus musculus OX=10090 GN=Rpl15 PE=1 SV=4	24.1	3.86011e+07	2.76569e+07	3.34446e+07	4.02617e+07	5.02091e+07	3.83406e+07	8.87946e+07	7.34091e+07	7.53537e+07	1.14673e+07	1.09333e+07	1.06354e+07
Q6PAT0	Probable inactive tRNA-specific adenosine deaminase-like protein 3 OS=Mus musculus OX=10090 GN=Adat3 PE=1 SV=1	37.5							73063	107367	70952.2
Q9ET30	Transmembrane 9 superfamily member 3 OS=Mus musculus OX=10090 GN=Tm9sf3 PE=1 SV=1	67.5	101807	300300	347026	4.05762e+06	1.18654e+06	1.48375e+06	647064	599668	1.12589e+06	913758	458047	875423
P61202	COP9 signalosome complex subunit 2 OS=Mus musculus OX=10090 GN=Cops2 PE=1 SV=1	51.6	1.23489e+07	1.64491e+07	1.33446e+07	2.86122e+07	3.70132e+07	3.28309e+07	1.74606e+07	3.03431e+07	2.66888e+07	6.81156e+06	6.46169e+06	5.12878e+06
Q8BML9	Glutamine--tRNA ligase OS=Mus musculus OX=10090 GN=Qars PE=1 SV=1	87.6	1.37048e+07	1.25337e+07	1.45386e+07	2.15851e+07	2.55637e+07	3.14597e+07	4.1656e+07	4.97308e+07	4.44911e+07	6.11428e+06	1.16877e+07	1.11559e+07
P62855	40S ribosomal protein S26 OS=Mus musculus OX=10090 GN=Rps26 PE=1 SV=3	13	1.72879e+07	1.60176e+07	1.92544e+07	1.24986e+07	2.95719e+07	1.74075e+07	4.62025e+07	4.80731e+07	4.86044e+07	4.71519e+06	8.32455e+06	4.12375e+06
Q8VDP4	Cell cycle and apoptosis regulator protein 2 OS=Mus musculus OX=10090 GN=Ccar2 PE=1 SV=2	102.9	3.97004e+06	2.28691e+06	2.16074e+06	3.54816e+07	2.63598e+07	2.87996e+07	1.39064e+07	1.46386e+07	8.41642e+06	1.74943e+07	1.17179e+07	1.42544e+07
P49443	Protein phosphatase 1A OS=Mus musculus OX=10090 GN=Ppm1a PE=1 SV=1	42.4	798191	251084	678560	6.37608e+06	4.25775e+06	3.443e+06	2.67115e+06	2.77001e+06	3.12198e+06	5.10271e+06	1.47844e+06	2.61371e+06
Q01730	Ras suppressor protein 1 OS=Mus musculus OX=10090 GN=Rsu1 PE=1 SV=3	31.5	2.01486e+06	2.24301e+06	1.80782e+06	6.3565e+06	2.83777e+06	3.69596e+06	1.23578e+07	1.46325e+07	1.08927e+07	2.90079e+06	2.24248e+06	3.06006e+06
P62281	40S ribosomal protein S11 OS=Mus musculus OX=10090 GN=Rps11 PE=1 SV=3	18.4	2.63984e+07	2.38093e+07	2.99391e+07	3.62206e+07	4.77318e+07	4.3245e+07	7.08142e+07	7.02606e+07	8.21553e+07	1.07397e+07	1.39392e+07	1.34216e+07
P35979	60S ribosomal protein L12 OS=Mus musculus OX=10090 GN=Rpl12 PE=1 SV=2	17.8	2.99123e+07	3.5832e+07	3.26572e+07	3.58873e+07	3.92575e+07	4.26259e+07	5.88532e+07	8.15475e+07	6.51778e+07	6.67076e+06	9.47742e+06	1.04892e+07
Q3U1J4	DNA damage-binding protein 1 OS=Mus musculus OX=10090 GN=Ddb1 PE=1 SV=2	126.8	7.41242e+06	7.1027e+06	1.23633e+07	3.47117e+07	4.09248e+07	3.66469e+07	6.55781e+07	6.60509e+07	7.09952e+07	2.92826e+07	3.40138e+07	3.04605e+07
P58137	Acyl-coenzyme A thioesterase 8 OS=Mus musculus OX=10090 GN=Acot8 PE=1 SV=1	35.8		49032.4	287381				901492	810892	1.15387e+06		133683
[truncated: 2,323 more rows]
