# Supplementary material for: One-shot analysis of translated mammalian lncRNAs with AHARIBO
Source: eLife. 2021 Feb 17;10:e59303. doi: 10.7554/eLife.59303 (PMC7932693; doi:10.7554/eLife.59303)
Supplement: Figure 3—source data 2. — Genes are considered differentially expressed when both log fold changes are higher/smaller than 1.5/−1.5 and FDR-adjusted p-values are smaller than 0.01. Proteins are considered differentially expressed when adjusted p-values are smaller than 0.05. RNA and protein DEGs. AHARIBO: AHA-mediated RIBOsome isolation; pSILAC: pulsed SILAC. [file elife-59303-fig3-data2.xlsx]

## Sheet: AHARIBO-tC vs AHARIBO-nP
geneSymbol	RNA log FC	PValue	gene ID	Prot. Fold change AHA	p-value
Abat	2.95277	4.85848e-24	Abat	2.82387	8.61638
Abcf2	-2.29858	1.12571e-13	Abcf2	-2.0278	12.862
Actr1a	2.02915	1.79554e-14	Actr1a	3.37979	9.90933
Add1	1.90301	1.50291e-12	Add1	2.41218	6.23078
Afap1	3.92848	1.58684e-68	Afap1	3.21564	4.67814
Akap12	-1.94447	2.83751e-09	Akap12	1.90565	8.58236
Akt1	3.2657	6.58506e-16	Akt1	2.8398	13.2429
Aldoc	3.08982	1.48494e-08	Aldoc	3.06361	7.64465
Alg2	1.93178	3.65929e-14	Alg2	3.58583	9.8263
Anxa2	2.72729	3.71577e-16	Anxa2	2.32839	6.38854
Ap3b2	4.63491	8.87761e-26	Ap3b2	3.74798	14.9528
Arl3	2.0559	1.36064e-18	Arl3	3.13641	5.90598
Arl4c	4.83929	2.457e-64	Arl4c	3.57104	12.8986
Armcx3	3.74399	1.21474e-33	Armcx3	4.0715	12.1371
Ass1	-4.15658	1.69843e-30	Ass1	-3.23313	13.9301
Atat1	2.71992	4.47613e-30	Atat1	4.84778	18.4643
Atl1	2.08035	5.34363e-13	Atl1	2.62634	5.79625
Basp1	2.92456	2.93843e-18	Basp1	4.13368	20.8861
Canx	-1.56226	1.55368e-08	Canx	3.08966	12.0006
Carhsp1	2.76731	1.39666e-15	Carhsp1	3.95831	4.815
Ccnb1	-3.27612	1.19149e-11	Ccnb1	-3.07554	5.1335
Cct3	-1.82729	2.95654e-08	Cct3	2.49102	17.9621
Cct8	-1.96541	1.23063e-08	Cct8	2.51346	17.3084
Cdc42ep4	1.95169	2.71647e-10	Cdc42ep4	4.56222	4.35941
Cdc73	-1.64069	2.67661e-10	Cdc73	-1.61462	6.35264
Cdk1	-2.15565	1.31715e-07	Cdk1	-1.99877	5.60534
Cdkn1b	2.22108	2.97299e-16	Cdkn1b	5.0321	9.34723
Cdkn1c	3.26622	3.30229e-16	Cdkn1c	4.34808	6.23961
Cep170	2.64864	5.03917e-18	Cep170	2.3631	4.75635
Cfl2	1.83151	7.63756e-12	Cfl2	3.63866	5.28693
Chmp4c	-4.36288	1.46768e-63	Chmp4c	-3.64725	4.46602
Chordc1	-1.75139	4.25194e-08	Chordc1	2.04928	14.5961
Ckb	3.14845	1.64099e-08	Ckb	5.25171	28.7763
Clasp1	1.78045	1.53042e-17	Clasp1	2.46161	7.7443
Cnrip1	9.07777	8.15275e-34	Cnrip1	4.72679	4.48557
Cotl1	2.88532	4.17204e-09	Cotl1	4.65297	10.7663
Cplx2	7.3366	3.85219e-86	Cplx2	3.45801	10.564
Crabp1	4.16549	4.70726e-14	Crabp1	5.69828	7.82935
Crabp2	3.88365	2.49116e-26	Crabp2	6.39156	5.61416
Crmp1	3.71044	2.86065e-24	Crmp1	4.3519	22.0493
Cttnbp2nl	1.76461	1.33188e-18	Cttnbp2nl	3.61991	5.26058
Cxadr	2.03018	1.28342e-26	Cxadr	2.70146	4.46374
Cyct	-5.74702	7.77472e-32	Cyct	-3.20283	7.21536
Dars	-1.92669	3.96906e-14	Dars	1.53402	4.84529
Dbn1	5.20993	5.13015e-28	Dbn1	4.19988	11.5693
Dclk1	8.68155	2.58487e-109	Dclk1	5.25838	18.8154
Dcx	14.7231	7.62146e-68	Dcx	5.29056	15.5248
Ddah2	3.6349	3.64361e-13	Ddah2	3.65624	7.71337
Degs1	-1.88636	5.24335e-17	Degs1	-2.51637	5.34069
Dnajc8	-1.69034	1.64385e-13	Dnajc8	-1.75491	5.81571
Dnmt3l	-7.61015	2.56144e-33	Dnmt3l	-2.34222	6.01031
Dpysl2	5.44475	1.36249e-53	Dpysl2	4.65058	42.8749
Dpysl3	5.01795	1.56187e-67	Dpysl3	4.29816	28.8607
Dpysl4	4.88403	6.286e-47	Dpysl4	4.09738	13.0215
Dpysl5	4.95806	3.05839e-54	Dpysl5	4.29271	15.4644
Eed	-3.27411	8.21237e-37	Eed	-2.5533	11.81
Efnb3	4.68559	1.03421e-34	Efnb3	4.23074	9.8347
Eftud2	-1.75174	1.65565e-08	Eftud2	-1.32254	5.40482
Eif1b	3.28694	2.2147e-21	Eif1b	4.73879	6.3027
Eif2d	-2.34288	7.58966e-29	Eif2d	-2.79892	6.34301
Eras	-6.29832	4.03857e-32	Eras	-2.92122	4.90774
Fabp5	3.7462	1.60172e-20	Fabp5	4.24282	10.7775
Fabp7	13.1572	7.36271e-121	Fabp7	6.69215	7.3355
Fen1	-2.26065	6.55986e-11	Fen1	-2.22154	6.41596
G3bp1	-1.72849	1.03009e-14	G3bp1	2.04203	5.06628
Gap43	6.30369	7.94572e-61	Gap43	4.45313	17.9233
Gars	-1.66849	2.13218e-09	Gars	2.36246	6.50463
Gdi1	3.3345	2.47469e-24	Gdi1	3.67309	20.5647
Gemin5	-2.28787	3.0772e-15	Gemin5	-1.94595	6.68064
Gnb1	1.72687	7.65701e-16	Gnb1	2.99276	4.34559
Gpsm1	5.86479	1.33432e-60	Gpsm1	2.93554	11.5442
Gstm7	5.7382	1.3135e-39	Gstm7	3.1147	7.08861
Hat1	-4.02514	6.52741e-30	Hat1	-2.65538	9.49312
Hdac1	-2.52197	8.69981e-22	Hdac1	-1.89843	5.24374
Hdgfl3	4.42306	1.03825e-50	Hdgfl3	5.52173	5.05583
Hells	-5.29009	5.52134e-31	Hells	-3.44744	19.1144
Hirip3	-2.49804	9.4225e-17	Hirip3	-2.41032	7.10704
Hk1	2.3389	1.80278e-09	Hk1	2.56493	6.22453
Hmces	-4.25902	4.65867e-73	Hmces	-3.19694	5.34601
Hmgb3	3.01896	5.18311e-23	Hmgb3	5.1943	11.8943
Hmgcs1	1.60607	2.78758e-07	Hmgcs1	4.00726	11.8827
Hnrnpf	-2.12675	3.94639e-18	Hnrnpf	-1.25284	4.45133
Hnrnpm	-1.61407	4.6032e-08	Hnrnpm	1.65867	4.39414
Hook2	-1.75139	5.39139e-09	Hook2	-2.60595	5.71757
Hsdl1	2.74497	4.00478e-33	Hsdl1	3.02336	5.67737
Hsp90aa1	-2.95562	5.02185e-12	Hsp90aa1	1.71513	12.9965
Hspa4	-2.36771	5.11183e-12	Hspa4	2.40742	13.4431
Hspa8	-1.8344	5.94466e-18	Hspa8	2.66179	19.6312
Hspa9	-3.07862	1.52615e-17	Hspa9	2.834	11.8879
Hspb1	-2.95947	1.5938e-08	Hspb1	-3.25905	16.6153
Hspd1	-3.04178	3.59707e-12	Hspd1	2.46709	14.7465
Igfbp2	3.15351	6.62725e-14	Igfbp2	2.88116	5.97513
Ina	3.24708	5.28439e-35	Ina	2.50439	5.57373
Ipo5	-2.43803	1.18658e-16	Ipo5	-1.40334	10.6356
Kif1a	7.44894	5.22593e-84	Kif1a	2.79779	12.7003
Kif5c	5.27162	1.26604e-86	Kif5c	2.73691	7.77718
Klc2	2.41965	1.86351e-09	Klc2	2.50298	10.0101
Klf5	-4.05605	1.97008e-35	Klf5	-2.86453	6.51274
Kpna2	-2.81041	5.71336e-13	Kpna2	-2.78339	7.9341
L1td1	-6.8679	3.98069e-15	L1td1	-2.19396	6.69659
Lbr	-1.87793	1.69952e-11	Lbr	-2.57041	6.24033
Lig1	-2.15836	3.58431e-09	Lig1	-2.1906	9.65537
Lrrc41	2.07768	1.68113e-21	Lrrc41	-3.5699	6.75708
Luc7l3	-1.73763	3.25251e-08	Luc7l3	1.97937	4.87042
Lysmd1	1.90942	2.32652e-07	Lysmd1	3.27171	4.76055
Maged1	3.35841	1.52473e-19	Maged1	2.51876	6.5663
Mageh1	2.64049	1.81205e-20	Mageh1	2.56658	8.11489
Map1b	3.08494	2.01258e-23	Map1b	3.48251	61.3093
Map2	4.45182	9.25852e-37	Map2	4.43672	43.5176
Map6	6.08514	5.90086e-65	Map6	3.28898	8.27097
Mapre2	2.87991	1.14275e-32	Mapre2	3.44965	5.01863
Mapre3	4.12065	4.4833e-38	Mapre3	4.54926	6.49439
Mapt	3.67751	7.62348e-22	Mapt	5.2754	15.4848
Marcks	3.72958	3.93773e-27	Marcks	5.26864	25.5413
Marcksl1	1.85871	8.2157e-09	Marcksl1	3.25893	6.15106
Mrps9	-1.82859	1.24899e-42	Mrps9	-2.22286	4.4226
Msh2	-2.93275	1.16344e-19	Msh2	-2.20483	5.96788
Msh6	-3.38232	7.57508e-16	Msh6	-1.77855	14.9783
Mybbp1a	-2.688	4.02229e-11	Mybbp1a	-1.71015	9.58651
Myh10	2.7999	2.60423e-17	Myh10	3.22014	33.0307
Napb	3.38655	2.59762e-22	Napb	2.65084	5.60285
Nasp	-3.15198	3.57668e-18	Nasp	3.33497	19.6862
Nbea	2.51139	1.45675e-16	Nbea	2.30578	10.1985
Ncam1	1.57436	7.62548e-11	Ncam1	3.63132	20.2982
Ncl	-2.56114	1.90271e-14	Ncl	1.83599	6.18038
Nes	4.18598	4.77932e-22	Nes	2.28365	6.64314
Nf1	1.74888	2.85441e-12	Nf1	2.25696	6.95137
Nr2f1	11.2014	1.27718e-106	Nr2f1	2.45029	4.48806
Nsun2	-2.53769	6.21061e-18	Nsun2	-2.13267	10.7109
Nup107	-2.23608	1.59206e-13	Nup107	-2.04752	10.1284
Nup98	-1.65691	1.45246e-08	Nup98	-1.43839	5.02072
Pa2g4	-1.73464	3.27948e-08	Pa2g4	1.92231	5.01271
Pabpc1	-1.58699	1.21052e-09	Pabpc1	1.51404	5.8061
Pafah1b3	3.26274	5.09862e-16	Pafah1b3	4.849	9.04784
Parva	4.15274	4.09078e-65	Parva	2.45046	10.4129
Pbx1	4.58152	2.88467e-51	Pbx1	2.82819	6.50997
Pcp4	6.26801	1.53915e-07	Pcp4	4.35073	4.50803
Pcsk1n	3.88056	2.37051e-08	Pcsk1n	2.98243	4.33
Pfas	-2.0352	5.53979e-09	Pfas	2.28475	4.56996
Pfkm	2.36599	1.55773e-17	Pfkm	2.58243	7.73707
Pou5f1	-5.48647	1.50486e-09	Pou5f1	-2.67035	6.00852
Ppa1	-1.94948	4.10472e-11	Ppa1	3.24635	6.12603
Prdx2	2.36693	3.60837e-12	Prdx2	4.54897	14.4568
Prdx5	2.13055	9.84329e-09	Prdx5	3.53224	5.91921
Prim1	-3.47998	2.79044e-31	Prim1	-2.01779	4.99043
Psat1	-1.94691	1.80756e-13	Psat1	2.1116	6.73383
Psma4	-1.78628	1.32826e-08	Psma4	3.82311	7.24054
Psmd1	-1.66125	9.78825e-08	Psmd1	2.43048	7.62231
Pspc1	-2.78016	7.08067e-14	Pspc1	2.53469	8.33126
Pygb	3.64026	3.57566e-28	Pygb	3.89251	7.36991
Rab3a	7.0438	6.3535e-46	Rab3a	3.28186	5.49313
Ranbp1	-1.90612	1.95798e-10	Ranbp1	4.59015	6.54535
Rbm25	-2.0929	2.21173e-07	Rbm25	-2.21414	5.99955
Rbp1	4.81132	1.27199e-43	Rbp1	3.49497	5.08352
Rbpms2	-3.26356	2.50703e-27	Rbpms2	-2.5516	6.1861
Rcn2	1.72484	2.20709e-14	Rcn2	2.83589	5.29344
Reep2	3.03617	6.11437e-17	Reep2	3.48814	6.72895
Rhob	4.08816	1.99977e-45	Rhob	2.31247	6.12396
Rps6ka1	-1.83498	3.58082e-07	Rps6ka1	-1.53566	4.41449
Rrp12	-3.51575	5.82935e-18	Rrp12	-2.62187	5.88182
Rtn1	5.32095	2.94916e-60	Rtn1	3.21457	6.06265
Rufy3	1.7532	3.321e-25	Rufy3	2.80884	5.80706
Sall2	7.15085	4.28793e-72	Sall2	3.42178	8.4105
Scrn1	3.08387	1.06666e-55	Scrn1	3.13454	5.9022
Serpinh1	4.5491	3.25431e-21	Serpinh1	4.87071	18.5482
Sh3glb1	1.93811	4.68611e-22	Sh3glb1	2.37678	10.1257
Sh3pxd2b	3.03727	9.10953e-28	Sh3pxd2b	3.66344	5.32166
Sipa1l2	1.94522	6.87438e-17	Sipa1l2	2.38207	4.34394
Slc25a13	-3.88716	1.4847e-39	Slc25a13	-1.43328	4.4165
Slc39a6	1.51541	6.72313e-11	Slc39a6	2.06908	10.326
Snrpa1	-1.63651	6.82409e-09	Snrpa1	-1.74315	5.76315
Spata5	-3.60674	2.18873e-42	Spata5	-3.10427	4.54724
Sptbn1	3.32894	6.01082e-27	Sptbn1	2.31484	13.1436
Srgap3	5.51357	2.97535e-99	Srgap3	2.4761	5.96819
Srsf6	-1.6427	2.05896e-14	Srsf6	2.90503	14.6855
Stxbp1	4.77636	1.22318e-45	Stxbp1	2.46663	5.00214
Stxbp6	3.24016	2.37366e-20	Stxbp6	4.25889	7.08802
Syn1	2.63001	8.14463e-15	Syn1	2.98507	4.33399
Tagln	2.64021	2.58191e-08	Tagln	3.87045	14.6853
Tagln3	4.17006	1.46177e-42	Tagln3	3.67921	13.1461
Tcaf1	5.98724	1.87619e-109	Tcaf1	1.81113	9.83554
Tceal3	7.85295	1.59325e-40	Tceal3	1.76994	4.7183
Tdh	-7.54245	1.41529e-39	Tdh	-1.55822	5.17124
Tefm	-2.22701	4.13692e-19	Tefm	1.57158	8.52925
Thrap3	-1.75132	1.208e-08	Thrap3	2.48544	5.04671
Tmx4	3.53243	2.87179e-68	Tmx4	4.00027	15.2457
Tpi1	2.41132	3.50431e-11	Tpi1	4.79783	26.3537
Tpm4	1.91407	1.44115e-11	Tpm4	2.80122	5.78931
Tppp	5.99177	1.03194e-34	Tppp	3.05882	4.44497
Tppp3	3.63829	1.21677e-18	Tppp3	4.46186	10.3503
Tpx2	-2.56759	3.37784e-07	Tpx2	-1.97377	6.8081
Trappc5	1.94477	3.18128e-10	Trappc5	2.98154	5.51641
Trim25	-4.91989	5.28255e-40	Trim25	-2.24407	6.49832
Trip12	-2.4167	5.72262e-15	Trip12	-1.42593	5.14963
Ttc28	4.4891	4.59598e-31	Ttc28	2.70096	6.36123
Ttc3	2.98452	7.61763e-33	Ttc3	2.68734	4.98538
Ttk	-3.25936	2.82574e-13	Ttk	-2.37125	10.3144
Tuba3a	-3.24126	2.16449e-07	Tuba3a	1.81134	16.169
Tubb2a	4.22631	1.09431e-21	Tubb2a	2.66413	43.5093
Tubb4a	7.52447	3.88288e-77	Tubb4a	3.79277	17.4748
Tubb5	1.63036	3.8132e-08	Tubb5	3.94547	9.17902
Uba2	-1.92263	2.50815e-12	Uba2	1.46979	4.36706
Ubqln2	1.96007	3.17983e-11	Ubqln2	3.67833	6.16237
Uchl1	2.83857	3.23357e-18	Uchl1	4.67211	11.8228
Urah	-6.59598	9.1616e-18	Urah	-4.41927	11.914
Usp48	-1.8961	1.78798e-12	Usp48	0.359891	5.37539
Vamp2	3.19551	9.54389e-22	Vamp2	3.18957	12.2172
Vamp4	2.46028	1.31929e-22	Vamp4	2.70656	11.848
Vim	2.85259	2.42409e-12	Vim	3.94003	32.6105

## Sheet: glob. trans. vs AHARIBO-nP
geneSymbol	RNA logFC	PValue	gene ID	Protein Fold change	p-value
Aars	-2.55921	4.03663e-12	Aars	1.39073	4.7911
Abat	2.52481	8.63428e-18	Abat	2.82387	8.61638
Abcf2	-3.02502	2.29714e-21	Abcf2	-2.0278	12.862
Abt1	-1.70035	2.31331e-07	Abt1	-2.97346	4.86489
Aco2	-1.71398	7.31809e-11	Aco2	3.68767	16.9384
Actn4	-1.62421	2.29782e-08	Actn4	2.59101	8.73095
Adh5	-2.09587	3.45344e-11	Adh5	4.32167	7.18422
Afap1	2.82703	9.39984e-39	Afap1	3.21564	4.67814
Ahcy	-2.49452	1.61103e-13	Ahcy	1.80229	5.46843
Ahsa1	-2.23173	5.25175e-14	Ahsa1	2.22585	5.64367
Akap12	-2.75649	3.2699e-16	Akap12	1.90565	8.58236
Akt1	2.28559	4.41383e-09	Akt1	2.8398	13.2429
Alg2	1.55746	9.09501e-10	Alg2	3.58583	9.8263
Alyref	-1.6617	4.07106e-11	Alyref	3.36536	7.07581
Anxa2	2.00875	6.71822e-10	Anxa2	2.32839	6.38854
Ap3b2	3.51325	2.75878e-16	Ap3b2	3.74798	14.9528
Arl3	1.55525	1.15034e-11	Arl3	3.13641	5.90598
Arl4c	4.35802	9.10715e-51	Arl4c	3.57104	12.8986
Armcx3	3.32516	5.01529e-26	Armcx3	4.0715	12.1371
Aspscr1	-1.7994	6.68289e-09	Aspscr1	2.3429	4.59167
Ass1	-4.78155	5.79769e-38	Ass1	-3.23313	13.9301
Atat1	2.79815	1.70616e-30	Atat1	4.84778	18.4643
Atl1	2.28417	2.50877e-14	Atl1	2.62634	5.79625
Basp1	2.11592	7.84778e-11	Basp1	4.13368	20.8861
Bysl	-2.41373	7.01289e-11	Bysl	-3.14069	9.75475
Canx	-1.93776	4.12024e-12	Canx	3.08966	12.0006
Carhsp1	1.90283	1.60625e-08	Carhsp1	3.95831	4.815
Ccnb1	-3.48623	8.37901e-13	Ccnb1	-3.07554	5.1335
Cct2	-1.54658	3.24353e-08	Cct2	3.56229	19.8558
Cct3	-2.39462	1.07413e-12	Cct3	2.49102	17.9621
Cct4	-1.64407	1.46265e-07	Cct4	2.24394	12.9715
Cct5	-1.62461	6.70005e-08	Cct5	2.217	7.17116
Cct7	-1.91669	1.28446e-08	Cct7	2.35212	10.2055
Cct8	-2.18791	3.15402e-10	Cct8	2.51346	17.3084
Cdc73	-1.63886	3.01634e-10	Cdc73	-1.61462	6.35264
Cdk1	-2.56954	5.72301e-10	Cdk1	-1.99877	5.60534
Cep170	2.12667	1.57934e-12	Cep170	2.3631	4.75635
Cfl2	1.92419	1.01133e-12	Cfl2	3.63866	5.28693
Chmp4c	-3.41361	4.80144e-46	Chmp4c	-3.64725	4.46602
Chordc1	-1.89527	3.58929e-09	Chordc1	2.04928	14.5961
Cit	-1.82207	1.72451e-08	Cit	0.323109	4.81417
Clasp1	1.57897	4.32038e-14	Clasp1	2.46161	7.7443
Cnrip1	5.96209	7.36033e-27	Cnrip1	4.72679	4.48557
Cplx2	6.34203	3.53941e-61	Cplx2	3.45801	10.564
Crabp1	3.40623	1.10872e-10	Crabp1	5.69828	7.82935
Crabp2	3.44883	8.36138e-22	Crabp2	6.39156	5.61416
Crmp1	2.82526	9.69855e-16	Crmp1	4.3519	22.0493
Cxadr	1.81781	1.24759e-21	Cxadr	2.70146	4.46374
Cyct	-4.74226	1.34888e-33	Cyct	-3.20283	7.21536
Dars	-1.82744	5.93967e-13	Dars	1.53402	4.84529
Dbn1	4.24742	1.08861e-20	Dbn1	4.19988	11.5693
Dclk1	7.13857	2.62699e-84	Dclk1	5.25838	18.8154
Dcx	11.419	3.64338e-56	Dcx	5.29056	15.5248
Degs1	-1.81444	3.27121e-16	Degs1	-2.51637	5.34069
Dnajc8	-2.34809	1.02455e-23	Dnajc8	-1.75491	5.81571
Dnmt3l	-7.86091	2.96438e-35	Dnmt3l	-2.34222	6.01031
Dpysl2	4.74443	1.57936e-43	Dpysl2	4.65058	42.8749
Dpysl3	4.03052	4.26638e-48	Dpysl3	4.29816	28.8607
Dpysl4	3.83451	4.02368e-31	Dpysl4	4.09738	13.0215
Dpysl5	3.86518	2.25447e-36	Dpysl5	4.29271	15.4644
Eed	-3.82281	3.37662e-47	Eed	-2.5533	11.81
Efnb3	4.2391	2.49876e-28	Efnb3	4.23074	9.8347
Eftud2	-2.50612	3.83099e-15	Eftud2	-1.32254	5.40482
Eif1b	2.6621	3.14412e-15	Eif1b	4.73879	6.3027
Eif2d	-2.47227	1.35164e-31	Eif2d	-2.79892	6.34301
Eif3b	-2.4245	1.40834e-15	Eif3b	-1.16923	7.91918
Emg1	-1.84758	1.48108e-11	Emg1	-2.33476	4.68897
Eras	-5.7223	7.87252e-36	Eras	-2.92122	4.90774
Fabp5	2.66642	2.98887e-12	Fabp5	4.24282	10.7775
Fabp7	13.7894	1.25158e-125	Fabp7	6.69215	7.3355
Fen1	-3.01542	2.80569e-17	Fen1	-2.22154	6.41596
Fkbp3	-1.5685	8.51834e-09	Fkbp3	2.62983	6.41139
G3bp1	-2.41612	4.93675e-26	G3bp1	2.04203	5.06628
Ganab	-1.73264	6.40838e-10	Ganab	2.50008	16.7507
Gap43	6.10223	1.18245e-56	Gap43	4.45313	17.9233
Gars	-2.43648	1.71401e-17	Gars	2.36246	6.50463
Gdi1	2.54598	1.20265e-15	Gdi1	3.67309	20.5647
Gemin5	-3.1151	3.61684e-25	Gemin5	-1.94595	6.68064
Gpsm1	4.97209	3.95806e-45	Gpsm1	2.93554	11.5442
Gstm7	4.02424	3.74014e-29	Gstm7	3.1147	7.08861
Hat1	-3.7571	5.58364e-27	Hat1	-2.65538	9.49312
Hdac1	-3.09403	1.38951e-30	Hdac1	-1.89843	5.24374
Hdgf	-1.82196	3.17467e-10	Hdgf	4.0748	12.0877
Hdgfl3	4.407	2.51246e-49	Hdgfl3	5.52173	5.05583
Hells	-5.18141	4.29219e-30	Hells	-3.44744	19.1144
Hirip3	-3.33835	6.14617e-27	Hirip3	-2.41032	7.10704
Hmces	-4.84624	1.81399e-89	Hmces	-3.19694	5.34601
Hmgb3	2.3774	1.73433e-15	Hmgb3	5.1943	11.8943
Hnrnpa2b1	-2.29778	4.07073e-10	Hnrnpa2b1	-2.75897	22.5714
Hnrnpa3	-2.17743	4.46108e-13	Hnrnpa3	-1.52338	6.27152
Hnrnpf	-2.7029	3.68209e-27	Hnrnpf	-1.25284	4.45133
Hnrnpm	-2.52909	1.103e-16	Hnrnpm	1.65867	4.39414
Hook2	-3.02007	1.11613e-21	Hook2	-2.60595	5.71757
Hpcal1	1.73811	4.33692e-09	Hpcal1	3.64177	6.1019
Hsdl1	2.02164	9.59585e-19	Hsdl1	3.02336	5.67737
Hsp90aa1	-3.23751	7.96201e-14	Hsp90aa1	1.71513	12.9965
Hspa4	-2.83195	5.38726e-16	Hspa4	2.40742	13.4431
Hspa8	-2.17109	5.39585e-24	Hspa8	2.66179	19.6312
Hspa9	-3.41623	1.19707e-20	Hspa9	2.834	11.8879
Hspb1	-4.69389	6.31912e-17	Hspb1	-3.25905	16.6153
Hspd1	-3.25577	1.71352e-13	Hspd1	2.46709	14.7465
Igfbp2	2.35018	7.52248e-09	Igfbp2	2.88116	5.97513
Ilf3	-1.65637	1.27001e-12	Ilf3	2.12935	4.96492
Impdh2	-2.78682	2.09251e-13	Impdh2	2.29594	5.44692
Ina	2.35522	2.58279e-20	Ina	2.50439	5.57373
Ipo5	-3.17367	1.37869e-25	Ipo5	-1.40334	10.6356
Jup	-2.01198	5.5954e-09	Jup	-1.511	4.74648
Kif1a	6.23978	6.63573e-64	Kif1a	2.79779	12.7003
Kif5c	4.12441	1.13586e-58	Kif5c	2.73691	7.77718
Klf5	-5.0651	2.21736e-49	Klf5	-2.86453	6.51274
Kpna2	-2.92228	8.27749e-14	Kpna2	-2.78339	7.9341
Kpnb1	-2.16969	5.35982e-10	Kpnb1	1.60699	6.76273
L1td1	-7.42214	1.23322e-16	L1td1	-2.19396	6.69659
Lbr	-2.27775	8.18613e-16	Lbr	-2.57041	6.24033
Lias	-1.6133	6.92569e-14	Lias	2.56092	8.42703
Lig1	-2.89997	1.36011e-14	Lig1	-2.1906	9.65537
Luc7l3	-2.09174	4.81533e-11	Luc7l3	1.97937	4.87042
Maged1	2.47377	4.8255e-12	Maged1	2.51876	6.5663
Mageh1	2.10834	1.67533e-14	Mageh1	2.56658	8.11489
Map1b	2.04451	5.84795e-12	Map1b	3.48251	61.3093
Map2	4.21061	1.25582e-33	Map2	4.43672	43.5176
Map6	4.76199	2.9172e-44	Map6	3.28898	8.27097
Mapre2	2.2865	6.10411e-22	Mapre2	3.44965	5.01863
Mapre3	3.90741	1.92203e-33	Mapre3	4.54926	6.49439
Mapt	2.85728	1.1416e-14	Mapt	5.2754	15.4848
Marcks	3.34722	8.50432e-23	Marcks	5.26864	25.5413
Mrps25	-1.89388	1.1292e-13	Mrps25	-2.51008	6.68171
Mrps9	-1.88976	1.36747e-45	Mrps9	-2.22286	4.4226
Msh2	-3.23285	5.81495e-23	Msh2	-2.20483	5.96788
Msh6	-4.06823	6.12095e-21	Msh6	-1.77855	14.9783
Mybbp1a	-3.5129	8.56881e-17	Mybbp1a	-1.71015	9.58651
Napb	3.40394	1.01032e-21	Napb	2.65084	5.60285
Nasp	-3.6103	1.80103e-22	Nasp	3.33497	19.6862
Nbea	2.03143	1.23413e-11	Nbea	2.30578	10.1985
Ncl	-3.14874	4.13561e-20	Ncl	1.83599	6.18038
Nes	3.15832	4.68052e-14	Nes	2.28365	6.64314
Nr2f1	13.724	1.71133e-90	Nr2f1	2.45029	4.48806
Nsun2	-3.1274	3.41904e-25	Nsun2	-2.13267	10.7109
Nudc	-2.12205	5.7615e-08	Nudc	2.60502	6.34002
Nup107	-2.78698	2.70022e-19	Nup107	-2.04752	10.1284
Nup214	-1.99017	2.82097e-23	Nup214	-1.83609	4.42562
Nup98	-2.17261	2.91697e-13	Nup98	-1.43839	5.02072
Oxnad1	-1.74998	4.53358e-17	Oxnad1	-3.04668	5.0826
Pa2g4	-2.59678	1.00852e-15	Pa2g4	1.92231	5.01271
Pabpc1	-1.55507	2.50863e-09	Pabpc1	1.51404	5.8061
Park7	-2.28433	1.42296e-12	Park7	3.34319	5.59856
Parva	4.17842	1.86555e-61	Parva	2.45046	10.4129
Pbx1	4.59209	4.21393e-50	Pbx1	2.82819	6.50997
Pcp4	7.50388	6.38557e-11	Pcp4	4.35073	4.50803
Pfas	-3.05976	4.28022e-17	Pfas	2.28475	4.56996
Pgd	-2.04503	4.05538e-11	Pgd	2.42456	8.03634
Phf5a	-1.70354	1.1584e-10	Phf5a	-2.95814	4.92564
Pou5f1	-6.58011	5.52182e-12	Pou5f1	-2.67035	6.00852
Ppa1	-2.68582	7.5039e-19	Ppa1	3.24635	6.12603
Prim1	-3.68187	1.42335e-34	Prim1	-2.01779	4.99043
Psat1	-2.57445	1.7755e-21	Psat1	2.1116	6.73383
Psma1	-1.57274	2.04556e-08	Psma1	1.58141	4.36014
Psma2	-1.52447	2.57522e-11	Psma2	2.6456	5.94387
Psma4	-2.11718	2.43876e-11	Psma4	3.82311	7.24054
Psma5	-1.50721	6.43883e-11	Psma5	3.3845	6.3992
Psma6	-1.83394	1.38435e-13	Psma6	3.76091	7.1237
Psmb3	-1.89754	7.63377e-11	Psmb3	3.81569	6.38727
Psmc1	-1.7266	3.48926e-08	Psmc1	3.3546	7.05187
Psmc2	-1.70067	1.2752e-10	Psmc2	2.83217	9.19121
Psmd1	-2.0148	1.68482e-10	Psmd1	2.43048	7.62231
Psmd11	-1.67126	3.67786e-21	Psmd11	2.51712	5.12174
Psmd7	-1.53318	1.07634e-07	Psmd7	3.14493	6.58043
Psmg2	-1.96733	6.59807e-19	Psmg2	4.38836	5.44691
Pspc1	-2.94707	3.25198e-15	Pspc1	2.53469	8.33126
Pygb	2.38481	4.48912e-14	Pygb	3.89251	7.36991
Rab3a	5.58897	1.77679e-34	Rab3a	3.28186	5.49313
Ranbp1	-2.89321	1.16814e-20	Ranbp1	4.59015	6.54535
Rbm25	-2.68823	7.86097e-11	Rbm25	-2.21414	5.99955
Rbp1	4.85272	2.30765e-44	Rbp1	3.49497	5.08352
Rbpms2	-3.67589	3.30672e-33	Rbpms2	-2.5516	6.1861
Reep2	2.6903	1.71866e-13	Reep2	3.48814	6.72895
Rhob	3.2368	3.15147e-30	Rhob	2.31247	6.12396
Rps27l	-1.89205	2.32884e-08	Rps27l	-4.4618	9.37576
Rps6ka1	-2.91164	9.20037e-15	Rps6ka1	-1.53566	4.41449
Rrm1	-1.96647	4.47011e-07	Rrm1	2.01024	6.97569
Rrp12	-3.75011	7.41605e-20	Rrp12	-2.62187	5.88182
Rtn1	5.28156	2.23377e-58	Rtn1	3.21457	6.06265
Rufy3	1.61016	2.35245e-21	Rufy3	2.80884	5.80706
Sall2	6.26607	8.05503e-53	Sall2	3.42178	8.4105
Scrn1	2.37933	1.92578e-34	Scrn1	3.13454	5.9022
Serpinh1	3.34503	1.73496e-13	Serpinh1	4.87071	18.5482
Sh3glb1	1.74876	3.10893e-18	Sh3glb1	2.37678	10.1257
Sh3pxd2b	2.11854	7.49412e-15	Sh3pxd2b	3.66344	5.32166
Shmt2	-3.18201	1.01374e-13	Shmt2	2.45074	6.80542
Slc25a13	-3.10266	1.1205e-27	Slc25a13	-1.43328	4.4165
Snrpa1	-2.24012	6.09874e-15	Snrpa1	-1.74315	5.76315
Sod1	-1.8633	7.23272e-12	Sod1	5.76003	5.21513
Spata5	-3.25642	7.38515e-36	Spata5	-3.10427	4.54724
Sptbn1	2.52251	4.30045e-17	Sptbn1	2.31484	13.1436
Srgap3	4.82783	1.12681e-79	Srgap3	2.4761	5.96819
Srsf6	-2.23437	1.86413e-24	Srsf6	2.90503	14.6855
Stip1	-2.4549	3.04823e-12	Stip1	3.70967	17.803
Stxbp1	3.51859	3.42943e-28	Stxbp1	2.46663	5.00214
Stxbp6	3.67819	3.15069e-23	Stxbp6	4.25889	7.08802
Syn1	1.94644	5.86263e-09	Syn1	2.98507	4.33399
Tagln3	4.40906	1.07446e-42	Tagln3	3.67921	13.1461
Tardbp	-2.37621	1.46275e-10	Tardbp	2.20325	5.96253
Tcaf1	5.71156	3.83529e-96	Tcaf1	1.81113	9.83554
Tcea1	-1.66207	3.49804e-13	Tcea1	2.52741	8.46565
Tceal3	7.64228	1.22288e-36	Tceal3	1.76994	4.7183
Tdh	-7.18114	2.90252e-38	Tdh	-1.55822	5.17124
Tefm	-2.56897	3.13845e-25	Tefm	1.57158	8.52925
Thrap3	-2.45138	7.4677e-15	Thrap3	2.48544	5.04671
Timm44	-1.74825	1.59792e-13	Timm44	2.0504	5.79241
Tmx4	3.28818	1.32501e-58	Tmx4	4.00027	15.2457
Tpm3	-1.93413	2.35531e-20	Tpm3	5.16767	8.40928
Tppp	5.70089	1.25945e-27	Tppp	3.05882	4.44497
Tppp3	2.5131	9.60593e-11	Tppp3	4.46186	10.3503
Tpx2	-2.88954	1.46554e-08	Tpx2	-1.97377	6.8081
Trim25	-5.26795	4.44121e-44	Trim25	-2.24407	6.49832
Trip12	-2.74588	2.03493e-18	Trip12	-1.42593	5.14963
Ttc28	3.78299	1.68391e-23	Ttc28	2.70096	6.36123
Ttc3	2.53229	6.93065e-25	Ttc3	2.68734	4.98538
Ttk	-3.37152	5.63977e-14	Ttk	-2.37125	10.3144
Tuba3a	-4.11153	4.6927e-11	Tuba3a	1.81134	16.169
Tubb2a	2.8949	3.65141e-12	Tubb2a	2.66413	43.5093
Tubb4a	6.45128	1.5181e-58	Tubb4a	3.79277	17.4748
Tufm	-2.33405	2.94786e-10	Tufm	2.123	4.94658
Uba2	-2.51246	3.44337e-19	Uba2	1.46979	4.36706
Ube2d3	-1.5607	2.06701e-09	Ube2d3	-2.58261	5.77902
Ubqln2	1.59457	4.96539e-08	Ubqln2	3.67833	6.16237
Uchl1	2.31476	3.9188e-13	Uchl1	4.67211	11.8228
Urah	-5.5795	1.79629e-24	Urah	-4.41927	11.914
Usp48	-2.60196	4.60759e-21	Usp48	0.359891	5.37539
Utp3	-1.60576	1.62546e-13	Utp3	-2.42064	4.89306
Vamp2	2.43232	6.51557e-14	Vamp2	3.18957	12.2172
Vamp4	1.79186	3.77376e-13	Vamp4	2.70656	11.848
Vcl	-1.71881	1.3729e-09	Vcl	2.38383	9.5527
Vim	2.22018	2.25281e-08	Vim	3.94003	32.6105

## Sheet: glob. trans. vs pSILAC
geneSymbol	RNA logFC	PValue	gene ID	Protein turnover EN/mESC	p-value
Aars	-2.71073	2.99447e-13	Aars	-2.9851	16.5241
Aars2	-2.07457	1.34541e-07	Aars2	-6.62976	5.00984
Abat	2.66629	3.05849e-19	Abat	-2.55461	7.84982
Abce1	-2.91354	1.43378e-23	Abce1	-2.77087	9.32219
Abcf1	-2.35676	1.28984e-12	Abcf1	-3.10585	5.1879
Abhd10	-1.59038	1.49494e-12	Abhd10	-6.03343	7.63719
Acad9	-1.85504	3.88359e-13	Acad9	-5.1258	10.1669
Acadm	-2.40712	5.06488e-14	Acadm	-3.45507	14.9734
Aco2	-1.96362	1.29302e-13	Aco2	-2.66382	7.79265
Acot9	-3.52224	1.57701e-44	Acot9	-3.71832	5.60385
Acp6	-3.75136	1.5138e-50	Acp6	-5.07122	8.11471
Acta2	6.19677	1.11485e-11	Acta2	-2.8506	11.2277
Actl6a	-3.20833	1.52347e-25	Actl6a	-3.75914	13.8523
Actn1	-2.51849	9.30699e-19	Actn1	-4.5546	8.85235
Actn4	-2.24469	3.98444e-14	Actn4	-3.10163	9.08434
Actr2	-1.58109	1.81257e-11	Actr2	-3.46258	16.2739
Acy1	-2.59327	2.27731e-11	Acy1	-5.24676	11.784
Adal	-2.20106	1.58938e-19	Adal	-2.22152	6.97109
Adat1	-2.35031	1.10321e-24	Adat1	-6.33443	6.32333
Adat2	-1.8019	5.20344e-10	Adat2	-4.79509	5.53632
Adh5	-2.24554	1.67545e-12	Adh5	-3.56547	19.052
Adh7	3.82668	9.19192e-08	Adh7	-3.27488	12.6362
Adk	-1.83926	1.44802e-09	Adk	-4.61724	13.0706
Adprh	-1.92723	4.11118e-09	Adprh	-4.01555	11.9704
Adsl	-3.01274	2.10671e-22	Adsl	-4.20835	15.848
Adss	-3.02943	3.14774e-24	Adss	-3.8115	16.6713
Afdn	-2.12328	3.55971e-13	Afdn	-2.67548	5.13828
Agpat2	-3.41721	3.57258e-19	Agpat2	-5.63275	18.9409
Agps	-1.58993	1.9075e-12	Agps	-3.94416	8.82162
Agtrap	-3.17243	2.88934e-20	Agtrap	-8.6057	11.8115
Ahcy	-2.60617	1.57004e-14	Ahcy	-4.10345	17.7786
Ahsa1	-2.62801	2.64482e-18	Ahsa1	-3.32688	6.67486
Aifm1	-3.12292	2.28411e-10	Aifm1	-4.52595	9.3795
Aimp1	-1.82353	8.90445e-13	Aimp1	-3.45539	12.9529
Aimp2	-2.04031	1.26043e-12	Aimp2	-3.1934	9.99446
Akap1	-2.53061	8.21329e-25	Akap1	-11.8253	6.00474
Akap12	-3.05425	4.32316e-19	Akap12	-2.29794	6.74628
Akr1b8	-3.27209	1.28462e-17	Akr1b8	-6.00441	5.42757
Akt1	1.95672	3.80956e-07	Akt1	-2.07786	8.63413
Alcam	5.3693	3.01382e-37	Alcam	-2.18363	4.92228
Aldh18a1	-1.8554	7.35227e-13	Aldh18a1	-3.51968	7.47258
Aldh1l1	1.61455	3.25508e-09	Aldh1l1	-5.53589	9.47438
Alg13	-4.97946	3.44285e-44	Alg13	-3.07628	5.56981
Alyref	-1.92713	3.45702e-14	Alyref	-3.86417	14.0602
Amt	-2.13168	1.91529e-14	Amt	-3.89842	8.21282
Ankrd28	-2.23216	5.49166e-26	Ankrd28	-5.91691	10.6229
Anp32b	-2.95371	1.14103e-22	Anp32b	-3.24235	13.6737
Anxa11	-2.09724	1.09382e-07	Anxa11	-7.25966	5.28135
Anxa2	1.98698	1.16389e-09	Anxa2	-2.08739	7.61815
Anxa7	-3.22062	8.62242e-27	Anxa7	-4.49293	16.7753
Apex1	-2.22296	5.18584e-12	Apex1	-3.85034	8.83809
Api5	-2.1872	3.39573e-16	Api5	-3.43977	13.0443
Apoe	-2.94108	1.35334e-09	Apoe	-3.47935	5.51628
App	4.04806	2.34102e-55	App	2.90431	5.9351
Aqr	-2.59904	6.67033e-15	Aqr	-4.23646	6.94726
Arhgap8	-2.58837	1.23459e-18	Arhgap8	-3.76065	5.44122
Arl8a	1.74796	1.42907e-11	Arl8a	-3.36474	14.5078
Armc1	-1.5719	2.33702e-15	Armc1	-4.5441	5.4846
Arnt	-1.66749	3.85931e-16	Arnt	-4.43896	7.05894
Arpc1b	-1.88073	1.11973e-07	Arpc1b	-4.05107	11.3484
Asah1	-2.38545	5.10057e-28	Asah1	-1.24238	8.04698
Asf1b	-2.74913	2.8836e-14	Asf1b	-4.77342	8.40195
Ash2l	-3.07273	9.24718e-47	Ash2l	-5.07211	7.09146
Asna1	-2.43446	2.63643e-12	Asna1	-3.24977	17.7786
Asns	-3.18303	1.25958e-28	Asns	-3.29344	6.7735
Ass1	-3.81621	2.25285e-27	Ass1	-1.46821	7.21655
Atf1	-3.29899	2.23059e-43	Atf1	-5.11816	9.14103
Atic	-3.69419	2.29438e-27	Atic	-4.02997	9.25146
Atm	-2.71978	1.93612e-15	Atm	-5.12741	9.29754
Atp1a1	-1.79388	2.32737e-07	Atp1a1	-2.55956	15.3209
Atp1a2	7.8174	6.82777e-20	Atp1a2	2.90177	7.47211
Atp1b3	-1.52472	2.67071e-13	Atp1b3	-3.98478	14.286
Atp2a2	-1.67016	2.2046e-12	Atp2a2	-1.94887	11.282
Atp6v1c1	-1.69677	1.59895e-13	Atp6v1c1	-3.3958	9.46015
Atxn3	-2.15795	2.50297e-30	Atxn3	-4.40595	5.09337
Bag4	-1.72336	4.71942e-22	Bag4	-6.56303	5.67067
Banf1	-2.2504	7.38111e-10	Banf1	-3.81808	8.87996
Basp1	1.76773	3.885e-08	Basp1	-4.48029	9.82753
Bax	-2.00178	9.77264e-09	Bax	-3.29051	10.2517
Bcap31	-2.69039	3.13269e-26	Bcap31	-3.71216	7.73167
Bcat1	-2.27805	1.08186e-30	Bcat1	-3.08229	12.0647
Bcat2	-3.97722	2.83458e-33	Bcat2	-6.62724	5.0632
Bckdhb	-1.87919	4.23213e-25	Bckdhb	-1.94194	7.65339
Bclaf1	-2.46742	1.1519e-15	Bclaf1	-5.59933	8.61992
Bcs1l	-1.59476	1.18841e-09	Bcs1l	-6.16327	14.8423
Bicral	-2.15394	8.28015e-24	Bicral	-3.86857	11.2131
Bin1	3.08909	2.50528e-19	Bin1	-4.53843	6.62072
Birc6	-1.84556	1.30233e-07	Birc6	-2.83414	9.80311
Bpnt1	-1.56226	1.27846e-12	Bpnt1	-3.77251	5.87899
Brix1	-3.14978	6.90278e-37	Brix1	-5.08938	6.7283
Brsk2	5.95332	6.67073e-65	Brsk2	3.89734	5.24349
Bst2	-2.09936	1.05895e-07	Bst2	-4.94608	6.88705
Btf3	-1.55919	2.65752e-09	Btf3	-2.13168	10.1637
Bub1b	-3.66973	3.22902e-13	Bub1b	-8.1377	6.57748
Bud31	-1.75552	1.73807e-11	Bud31	-8.65082	5.41525
Bysl	-2.82594	7.08694e-14	Bysl	-3.62028	11.2322
C1qbp	-2.8016	9.21959e-20	C1qbp	-4.29878	12.0752
C2cd5	-2.52629	1.67998e-48	C2cd5	-3.31193	8.32
Cacybp	-2.49105	1.90075e-14	Cacybp	-2.91186	10.7426
Cad	-3.08826	1.25479e-08	Cad	-4.12669	16.5489
Cadm4	2.1819	9.53746e-11	Cadm4	3.31844	5.64476
Canx	-2.54274	5.74691e-19	Canx	-3.13506	16.4982
Capns1	-1.78519	5.09209e-10	Capns1	-3.16399	13.7222
Caprin1	-1.68917	2.38381e-09	Caprin1	-1.99121	10.1411
Cars	-3.25055	1.56684e-39	Cars	-3.85652	10.1368
Cars2	-1.91819	4.24875e-20	Cars2	-4.00743	6.60249
Cbwd1	-2.04854	8.85663e-20	Cbwd1	-3.97098	7.53936
Cbx1	-2.22166	1.26112e-30	Cbx1	-5.33478	7.86465
Cc2d1b	-2.67599	4.38643e-16	Cc2d1b	-7.05356	13.4245
Ccar1	-2.0977	1.81245e-12	Ccar1	-3.05051	10.4186
Ccdc25	-2.06393	5.23668e-21	Ccdc25	-2.50238	7.68951
Cct3	-2.62972	9.67942e-15	Cct3	-3.30219	10.0155
Cct5	-1.5609	2.03847e-07	Cct5	-2.94323	16.5213
Cct7	-1.96892	5.54091e-09	Cct7	-3.0618	16.2733
Cct8	-2.47594	1.90416e-12	Cct8	-3.19832	10.218
Cdc20	-2.56468	3.8725e-08	Cdc20	-6.29653	6.75968
Cdc45	-3.22285	1.08244e-24	Cdc45	-4.03962	9.27477
Cdca3	-2.57251	3.30722e-07	Cdca3	-6.05123	4.95133
Cdh13	3.70081	4.11993e-13	Cdh13	-5.23213	6.80022
Cdk1	-2.72402	6.82562e-11	Cdk1	-1.55028	5.94485
Cdk12	-2.5353	4.73876e-20	Cdk12	-6.91966	7.20774
Cdkn2aipnl	-1.60615	9.03129e-09	Cdkn2aipnl	-6.58708	11.1046
Cenpe	-2.95348	1.8208e-09	Cenpe	-3.81509	5.85092
Cenph	-4.49601	5.6557e-36	Cenph	-5.96812	9.85584
Cep290	-2.15697	4.26106e-07	Cep290	-2.45558	12.7608
Cep55	-4.08805	2.13745e-17	Cep55	-6.08294	7.15699
Cfdp1	-1.87149	6.57947e-16	Cfdp1	-2.65827	9.11699
Cfl2	1.80147	1.62385e-11	Cfl2	-3.85907	6.06407
Chaf1b	-3.63252	9.43798e-30	Chaf1b	-6.02464	6.10516
Chchd4	-2.02597	2.99672e-15	Chchd4	-3.60668	5.42886
Chek1	-4.4977	2.33502e-37	Chek1	-8.8776	7.71681
Chordc1	-2.42515	1.25289e-13	Chordc1	-2.66737	6.21322
Ciapin1	-1.65849	3.08263e-10	Ciapin1	-3.25854	6.15872
Cisd3	-4.16076	1.62963e-31	Cisd3	-6.77181	8.05453
Ckap4	-1.69784	6.51242e-09	Ckap4	-3.165	11.6915
Cks1b	-2.52507	3.31462e-12	Cks1b	-6.48948	6.0392
Cks2	-2.92545	1.51127e-10	Cks2	-8.61748	9.29679
Clic4	-1.54179	1.18559e-10	Clic4	-3.54716	9.05757
Clns1a	-1.91226	4.92675e-17	Clns1a	-2.22593	11.6782
Clpb	-1.56321	5.21447e-10	Clpb	-4.30338	9.79017
Cluh	-3.08519	1.46793e-19	Cluh	-3.72846	13.216
Clvs1	5.17915	2.2813e-21	Clvs1	-1.14124	9.63117
Cnbp	-1.83495	2.94537e-12	Cnbp	-2.83918	5.69082
Cndp2	-2.44771	6.6522e-14	Cndp2	-3.69553	10.2695
Cnot1	-2.21624	6.61058e-16	Cnot1	-3.05022	6.36367
Cnot10	-2.44422	1.20001e-30	Cnot10	-6.19487	5.9855
Cnot3	-1.6015	1.10254e-08	Cnot3	-6.86658	5.43238
Cnot9	-1.89769	4.39316e-20	Cnot9	-4.26704	6.45327
Cnpy3	-1.66759	1.55761e-08	Cnpy3	-7.39993	5.23193
Cobl	-3.65082	1.30821e-32	Cobl	-4.2291	18.7887
Col3a1	11.5118	1.38843e-26	Col3a1	-4.57042	13.5142
Cops3	-2.04281	3.84992e-17	Cops3	-3.7175	9.38294
Cops5	-1.57371	2.15702e-09	Cops5	-3.22843	12.9251
Cops6	-1.5576	2.26231e-08	Cops6	-3.43314	11.9008
Cops7a	-1.96576	8.61851e-10	Cops7a	-3.59214	6.13481
Coq3	-2.21858	1.03631e-20	Coq3	-6.97228	10.4389
Coro1a	1.65782	1.75457e-08	Coro1a	-5.29393	7.61363
Cox6c	-1.54782	3.5963e-08	Cox6c	-2.85523	7.48377
Cplx2	7.72105	2.90291e-69	Cplx2	-2.33813	6.93951
Crabp2	3.65954	3.98799e-24	Crabp2	-6.35273	7.48077
Creld2	-2.52193	9.34068e-14	Creld2	-3.36885	7.23664
Crip1	-2.65265	3.42885e-08	Crip1	-3.53155	9.23372
Crlf3	-2.84334	1.33559e-57	Crlf3	-3.90057	5.02803
Crmp1	2.68972	1.68437e-14	Crmp1	-4.15751	8.12792
Csad	-2.50398	1.62212e-24	Csad	-3.91802	11.8011
Cse1l	-3.30058	1.96073e-19	Cse1l	-3.15617	14.9574
Csnk2a2	-1.52703	1.03694e-15	Csnk2a2	-4.26091	5.36541
Csrp2	-1.85937	9.62422e-13	Csrp2	-1.82931	5.08995
Cstf3	-2.64355	1.64016e-14	Cstf3	-6.65452	5.8615
Cth	-5.70891	2.32056e-69	Cth	-2.55312	6.99016
Ctnna1	-3.25245	5.83691e-23	Ctnna1	-3.34227	9.5527
Cul1	-1.79377	1.85098e-16	Cul1	-2.82677	16.5914
Cul2	-2.38694	1.79333e-13	Cul2	-3.46718	5.72915
Cul4b	-3.5919	1.46172e-20	Cul4b	-3.3994	7.24601
Cul5	-1.82877	4.42865e-12	Cul5	-3.85486	12.3307
Cxadr	1.73584	1.19488e-19	Cxadr	-5.08446	6.44244
Cyb5a	-1.55458	3.88554e-09	Cyb5a	-2.9481	7.4915
Cyb5r3	-1.74253	6.83675e-08	Cyb5r3	-2.97363	12.1508
Cycs	-1.7233	3.86098e-11	Cycs	-4.10161	10.2201
Cyfip1	-1.86503	2.36195e-09	Cyfip1	-3.07692	10.355
Cyp20a1	-2.20031	3.42942e-21	Cyp20a1	-5.71064	9.73035
Dach1	5.73588	2.88303e-36	Dach1	4.145	7.61494
Dap3	-1.84579	3.6911e-13	Dap3	-2.37236	8.76643
Dars	-2.11433	1.6254e-16	Dars	-2.96927	12.4165
Dars2	-2.77424	5.65051e-23	Dars2	-5.981	12.5317
Daxx	-1.99839	1.04012e-10	Daxx	-7.06309	9.81985
Dcps	-1.72457	1.78697e-16	Dcps	-3.63442	12.3274
Dctpp1	-3.29903	4.75811e-13	Dctpp1	-4.03217	11.8051
Ddhd2	-2.04989	7.59409e-20	Ddhd2	-5.27402	6.52616
Ddi2	-1.53013	2.60116e-28	Ddi2	-3.18191	8.29679
Ddrgk1	-1.76293	6.21247e-09	Ddrgk1	-7.73806	11.886
Ddt	-1.91992	1.26552e-07	Ddt	-4.23524	8.80577
Ddx1	-2.38146	3.97756e-12	Ddx1	-3.5013	11.6433
Ddx11	-2.90919	2.23988e-14	Ddx11	-6.21531	11.6904
Ddx17	-1.76711	4.37413e-07	Ddx17	-3.17931	9.29458
Ddx20	-3.43586	8.29828e-29	Ddx20	-5.39027	8.30764
Ddx27	-3.35949	1.91836e-26	Ddx27	-3.33266	5.98728
Ddx39b	-1.7231	4.97867e-12	Ddx39b	-3.01771	15.2489
Ddx3x	-2.15655	1.27879e-12	Ddx3x	-2.46629	14.513
Ddx4	-2.65323	3.11068e-13	Ddx4	-2.95907	7.08409
Ddx46	-2.74858	6.13463e-18	Ddx46	-3.60634	6.48242
Ddx5	-1.76303	1.1034e-08	Ddx5	-2.18656	14.6425
Decr1	-1.81763	1.37142e-12	Decr1	-4.66516	6.66262
Def6	-3.50385	1.41987e-11	Def6	-7.317	9.32826
Degs1	-2.30064	4.43263e-24	Degs1	-3.46297	7.28275
Dek	-2.34931	9.42211e-16	Dek	-4.74031	8.16041
Dera	-1.71751	3.85514e-19	Dera	-2.87428	5.60385
Dhfr	-3.26349	1.40148e-34	Dhfr	-4.70191	6.95076
Dhodh	-2.85936	3.06834e-25	Dhodh	-4.70452	6.07826
Dhrs4	-2.04984	1.74539e-11	Dhrs4	-5.84842	6.89518
Dhx15	-2.1751	7.94245e-12	Dhx15	-3.57919	11.239
Dhx29	-2.46278	7.84262e-15	Dhx29	-2.98597	9.14991
Dhx9	-3.63858	3.50534e-27	Dhx9	-3.22516	12.4075
Diablo	-1.92498	2.77146e-10	Diablo	-7.06695	6.33857
Diaph1	-3.08068	1.16817e-15	Diaph1	-3.66156	16.0342
Dido1	-2.67781	7.52123e-21	Dido1	-5.25594	5.17419
Dimt1	-2.89442	1.05226e-30	Dimt1	-5.8236	6.82149
Dis3	-3.87597	5.86401e-29	Dis3	-3.38148	8.62133
Dkc1	-3.70049	5.35083e-43	Dkc1	-7.79032	5.40242
Dlat	-1.62176	1.53285e-11	Dlat	-4.53738	5.88648
Dlg1	-2.33357	1.72819e-23	Dlg1	-12.2188	5.44689
Dlgap5	-3.43388	1.44881e-10	Dlgap5	-3.2169	7.77863
Dmtn	-1.84528	5.08576e-08	Dmtn	-7.20719	23.1625
Dna2	-3.922	6.32317e-22	Dna2	-6.40632	21.4087
Dnajb11	-2.56655	5.6996e-24	Dnajb11	-3.90981	9.08339
Dnajc10	-1.70481	1.41356e-17	Dnajc10	-8.07352	7.19696
Dnajc2	-2.83206	5.76736e-20	Dnajc2	-5.42682	9.01894
Dnajc21	-3.63043	2.77561e-56	Dnajc21	-4.49465	7.51864
Dnajc7	-1.99232	5.3897e-15	Dnajc7	-1.21477	6.34778
Dnajc8	-2.55989	1.85409e-27	Dnajc8	-3.86853	9.03871
Dnm1l	-1.76495	3.27346e-08	Dnm1l	-3.19202	13.3124
Dock6	-3.19467	4.69395e-18	Dock6	-2.7662	6.40009
Dock8	3.93771	1.89033e-21	Dock8	-4.9177	23.0492
Dph5	-2.03206	1.06893e-20	Dph5	-3.92127	4.94046
Dpp7	-3.13979	1.95626e-21	Dpp7	-6.4262	7.64395
Dppa5a	-7.66979	6.82254e-11	Dppa5a	-10.2248	11.2506
Dpysl2	4.32121	8.74869e-38	Dpysl2	-3.39232	11.8874
Drg1	-1.67563	1.41958e-13	Drg1	-1.84752	7.12856
Dstn	-1.99324	8.10638e-21	Dstn	-2.88586	15.2117
Dtymk	-3.24438	1.75804e-60	Dtymk	-4.26086	8.89061
Dus1l	-3.11767	7.29665e-15	Dus1l	-5.99467	12.3349
Dusp12	-1.77342	1.97082e-17	Dusp12	-3.16825	7.57191
Dynll2	2.0581	5.34233e-13	Dynll2	-2.97063	10.4851
Ebna1bp2	-3.35861	2.02006e-27	Ebna1bp2	-5.81035	17.9963
Echdc2	-2.18186	1.50775e-12	Echdc2	-5.61514	6.2475
Ect2	-3.5567	1.43648e-14	Ect2	-2.8561	12.6357
Eef1d	-2.03679	4.60466e-10	Eef1d	-3.49611	17.35
Eef1e1	-2.04719	3.51537e-20	Eef1e1	-3.00114	10.4653
Eef1g	-1.58132	3.18552e-08	Eef1g	-3.20637	18.2052
Efnb1	4.51859	2.65682e-35	Efnb1	-1.09536	7.37931
Efnb3	3.86274	2.42999e-24	Efnb3	3.54296	5.11173
Eftud2	-2.8631	9.90436e-19	Eftud2	-2.68112	7.73843
Egln1	2.98306	3.78958e-22	Egln1	-1.21677	13.3709
Eif1a	-3.2714	2.51538e-37	Eif1a	-2.38838	9.7225
Eif2a	-1.9546	3.67275e-15	Eif2a	-4.34688	7.7898
Eif2ak2	-1.85353	4.85378e-13	Eif2ak2	-3.60708	6.91422
Eif2b1	-2.35847	9.5193e-22	Eif2b1	-3.58318	9.38522
Eif2d	-2.89056	2.11589e-41	Eif2d	-5.55239	11.8394
Eif2s1	-3.08187	4.35365e-31	Eif2s1	-3.5414	8.95267
Eif2s2	-2.84369	1.50913e-30	Eif2s2	-3.27716	10.7398
Eif2s3x	-1.76405	1.93886e-15	Eif2s3x	-3.05722	17.6255
Eif3a	-2.59946	2.22986e-13	Eif3a	-2.90133	8.21122
Eif3b	-2.59544	2.20209e-17	Eif3b	-3.09028	10.8085
Eif3c	-2.28306	7.75395e-13	Eif3c	-3.44522	13.098
Eif3g	-1.87834	9.15785e-08	Eif3g	-3.03775	12.3044
Eif3j2	-2.3059	4.55801e-11	Eif3j2	-4.31383	12.241
Eif3l	-2.20712	1.95442e-18	Eif3l	-3.71615	10.965
Eif4a1	-2.36118	2.2165e-19	Eif4a1	-2.67925	10.3195
Eif4a3	-1.98345	4.38481e-10	Eif4a3	-4.85385	6.78966
Eif4g1	-2.45941	2.55723e-11	Eif4g1	-2.46053	9.08416
Eif5a	-2.35675	2.49057e-15	Eif5a	-2.60632	7.33898
Eif5b	-2.69015	4.14477e-10	Eif5b	-2.68137	8.98574
Eif6	-1.98432	2.10476e-08	Eif6	-3.23516	12.1905
Elac2	-3.34676	1.16413e-23	Elac2	-3.98187	9.57775
Elavl3	3.73723	3.14986e-32	Elavl3	-0.530865	9.33723
Elp2	-1.69676	5.93741e-08	Elp2	-4.15964	19.4851
Emb	-3.15529	1.05469e-18	Emb	-5.8742	5.76696
Eml4	-2.20421	1.65895e-19	Eml4	-3.3062	11.5981
Enah	-2.43048	4.23811e-37	Enah	-2.78944	10.2773
Epb41l2	-2.11833	1.2296e-17	Epb41l2	-4.32381	7.95851
Epha2	-4.65937	2.18074e-19	Epha2	-1.71722	7.66213
Eprs	-3.20086	7.64176e-19	Eprs	-3.43803	8.71084
Ercc3	-1.91139	3.83754e-25	Ercc3	-4.33288	9.86243
Erf	-2.56738	2.00774e-07	Erf	-6.32314	21.5677
Erh	-2.47929	3.50427e-22	Erh	-3.52627	11.7694
Ermp1	-2.37246	1.37422e-19	Ermp1	-4.75267	8.55193
Esf1	-3.49298	2.10171e-21	Esf1	-5.68126	19.7727
Etf1	-3.37209	6.7413e-44	Etf1	-3.66063	13.2692
Etfa	-2.09027	7.30996e-19	Etfa	-2.9553	15.6492
Etnk1	-1.91463	1.64771e-08	Etnk1	-6.63694	8.569
Ewsr1	-2.63138	6.44462e-20	Ewsr1	-3.62225	11.5387
Exosc2	-3.12955	2.12573e-37	Exosc2	-7.89758	8.94699
Exosc7	-2.12742	4.33494e-28	Exosc7	-6.71436	14.1032
Exosc8	-2.56257	2.42847e-24	Exosc8	-7.26941	9.81586
Ezh2	-1.81195	8.31886e-13	Ezh2	-7.42267	8.7575
Fabp5	2.42867	1.37237e-10	Fabp5	-3.53971	6.59309
Faf1	-2.4082	7.12799e-28	Faf1	-4.12336	9.5262
Fam136a	-2.28626	4.55468e-16	Fam136a	-3.98817	6.80571
Fam169a	-4.5451	2.32823e-21	Fam169a	-3.84979	10.5661
Fam49b	-1.62408	2.96511e-10	Fam49b	-3.50507	7.47043
Fam98a	-1.87872	1.86605e-10	Fam98a	-7.65817	6.51981
Fanci	-4.28134	1.84435e-31	Fanci	4.32776	18.5768
Far1	-2.14642	2.61385e-09	Far1	3.12759	7.10732
Farsb	-2.74044	3.46648e-51	Farsb	-4.053	17.2085
Fbl	-2.3035	2.05315e-11	Fbl	-7.08957	6.10032
Fbxo22	-3.13287	1.76745e-70	Fbxo22	-3.59468	5.53409
Fen1	-3.38484	1.67243e-20	Fen1	-4.19042	6.49235
Fermt2	-1.86043	1.42676e-21	Fermt2	-3.10031	6.61404
Fignl1	-4.32205	2.76193e-27	Fignl1	-4.29492	6.5986
Fkbp3	-1.74669	1.73793e-10	Fkbp3	-3.20999	9.79186
Fkbp5	-3.09372	5.66139e-71	Fkbp5	-4.27526	9.51022
Fkbp9	-1.68243	7.60784e-14	Fkbp9	-3.41301	6.40804
Flnb	-1.75062	4.305e-09	Flnb	-2.65443	15.8868
Fmr1	-1.86609	5.92291e-09	Fmr1	-2.95689	5.81617
Foxd3	-4.94356	3.76306e-15	Foxd3	-8.57475	16.294
Fpgs	-2.1708	3.01608e-09	Fpgs	-7.81389	4.97835
Frrs1	-4.97977	8.85264e-105	FRRS1	-5.85271	13.8446
Ftsj3	-4.81477	1.12961e-37	Ftsj3	-8.6647	18.9717
Fubp1	-1.62262	4.04914e-07	Fubp1	-3.44137	14.7362
Fus	-2.38647	1.79049e-19	Fus	-3.54715	24.643
Fxr1	-1.86612	2.32115e-12	Fxr1	-2.47796	8.4378
G3bp1	-2.77441	8.0998e-33	G3bp1	-3.4585	14.8452
Gabpa	-1.96938	2.33633e-17	Gabpa	-6.56421	9.83599
Ganab	-2.13654	6.35993e-14	Ganab	-3.31049	14.0508
Gars	-2.46416	8.37146e-18	Gars	-2.92411	9.95313
Gart	-4.59509	1.87849e-28	Gart	-3.65357	12.6142
Gatad2a	-2.33655	1.41959e-12	Gatad2a	-4.1042	6.7463
Gbe1	2.16589	6.90915e-08	Gbe1	-8.85002	7.45182
Gbx2	-3.59341	2.12013e-15	Gbx2	-5.2034	7.18456
Gclc	-1.64618	6.02341e-14	Gclc	-2.55415	5.92191
Gcsh	-2.3664	1.36204e-15	Gcsh	-5.03887	12.3062
Gdi1	2.14465	7.71377e-12	Gdi1	-2.01309	10.6328
Gemin5	-3.16497	1.12556e-25	Gemin5	-3.8954	5.64503
Get4	-1.84219	5.53658e-13	Get4	-2.28584	5.8007
Gfm1	-2.84246	1.39295e-13	Gfm1	-3.98878	14.463
Gfm2	-2.8167	4.13878e-21	Gfm2	-5.78413	6.37318
Gfpt2	-4.04902	7.42984e-45	Gfpt2	-3.10981	10.3261
Gid8	-2.65295	1.19565e-36	Gid8	-3.68609	11.8947
Gins1	-3.843	2.6219e-36	Gins1	-4.05415	8.94189
Gins2	-3.32091	4.16117e-12	Gins2	-4.2883	10.6194
Gins3	-3.43742	1.20845e-44	Gins3	-5.98222	13.3922
Gins4	-2.51425	2.27587e-19	Gins4	-6.28625	4.93065
Gla	-1.78433	5.5916e-14	Gla	-10.4791	10.6132
Glb1	-2.37354	3.08514e-26	Glb1	-11.0536	6.34938
Gldc	-3.92606	1.04015e-17	Gldc	-6.33778	5.13826
Glmn	-1.73946	7.16609e-09	Glmn	-3.15187	9.68813
Glo1	-1.66266	8.92914e-13	Glo1	-3.03938	14.5169
Glrx3	-1.53902	3.85915e-12	Glrx3	-2.38075	14.0913
Glud1	-2.54479	1.04578e-26	Glud1	-3.15605	11.3537
Glul	-1.88719	1.28263e-10	Glul	-3.05217	6.56695
Gnas	2.08688	3.5339e-26	Gnas	-2.63947	9.13643
Gng3	2.18519	5.79844e-08	Gng3	-4.9041	5.74198
Gnl2	-2.39401	1.06509e-17	Gnl2	-2.03161	6.71137
Gnl3	-3.71752	1.49419e-34	Gnl3	-2.27037	9.53576
Gnpat	-1.58231	1.26047e-13	Gnpat	-5.97319	8.19631
Gnpda1	-4.02457	4.58985e-46	Gnpda1	-3.76322	6.10109
Golt1b	-1.56695	9.68083e-16	Golt1b	-7.09078	6.33341
Got1	-2.34679	1.94162e-24	Got1	-3.25736	13.1853
Gpa33	-4.79794	4.05633e-28	Gpa33	-7.09435	10.921
Gpd2	-3.11283	4.50988e-17	Gpd2	-3.39626	5.03407
Gpm6a	8.95431	2.18562e-70	Gpm6a	4.14005	8.00091
Gpt2	-1.96702	1.14571e-17	Gpt2	-9.72202	5.71145
Grk6	-2.55025	2.91971e-13	Grk6	-4.55461	7.03702
Grpel1	-2.05307	8.70146e-11	Grpel1	-3.98821	14.1357
Gspt1	-2.45616	5.80406e-11	Gspt1	-3.22429	14.0357
Gsr	-3.08719	1.93646e-30	Gsr	-4.02773	13.4306
Gsta4	-2.967	3.4744e-21	Gsta4	-3.11982	7.57237
Gstm5	1.65596	4.20615e-08	Gstm5	-3.48404	5.3222
Gstm7	3.96923	2.30139e-29	Gstm7	-2.79939	9.91403
Gtf2a2	-1.87517	6.16585e-11	Gtf2a2	-8.62091	8.77716
Gtf2f2	-2.15806	1.83564e-27	Gtf2f2	-4.36752	9.34343
Gtse1	-3.54643	6.48063e-18	Gtse1	-4.2493	10.8779
Hadha	-1.77213	3.00288e-10	Hadha	-3.16111	7.28963
Hadhb	-1.87029	1.61199e-10	Hadhb	-3.91427	8.67022
Hars	-1.9814	1.22258e-10	Hars	-3.44739	13.8375
Hat1	-4.26919	8.47059e-33	Hat1	-3.26919	5.27245
Hck	-3.71464	5.43985e-32	Hck	-4.03503	6.21731
Hdac1	-3.23057	1.0631e-32	Hdac1	-3.0644	9.60025
Hddc3	2.02481	6.94306e-09	Hddc3	-7.11512	14.2003
Hdgf	-2.10722	5.6742e-13	Hdgf	-3.57468	15.6591
Hdgfl3	3.68502	6.6999e-38	Hdgfl3	-8.30733	9.56268
Hdhd5	-1.75235	3.57939e-16	Hdhd5	-8.70485	12.0972
Heatr3	-2.78648	9.40425e-28	Heatr3	-3.68056	10.5627
Hells	-5.76443	6.43322e-35	Hells	-4.43678	5.84225
Herc4	-3.80818	1.13936e-27	Herc4	-3.84989	6.93998
Hexim1	-2.44042	1.5408e-19	Hexim1	-2.91895	5.1604
Hibadh	-2.29061	1.15273e-24	Hibadh	-5.00371	6.51547
Hibch	-1.65983	1.41099e-10	Hibch	-5.39298	5.20769
Hikeshi	-1.9559	2.2521e-20	Hikeshi	-4.25263	8.92468
Hirip3	-3.52282	2.51802e-29	Hirip3	-4.1726	5.36907
Hist1h1a	-2.95806	6.3667e-09	Hist1h1a	-2.10985	6.37941
Hk2	-2.06991	6.60212e-09	Hk2	-2.4524	11.8389
Hmces	-5.21357	5.82588e-100	Hmces	-5.18479	5.29259
Hmgb2	-2.65494	7.75293e-10	Hmgb2	-4.32642	9.63533
Hmmr	-3.67177	7.87263e-12	Hmmr	-7.61247	6.18455
Hnrnpa2b1	-2.53942	7.6832e-12	Hnrnpa2b1	-3.65279	15.4289
Hnrnpa3	-2.41706	1.63543e-15	Hnrnpa3	-3.87283	9.50788
Hnrnpab	-1.82053	2.10129e-10	Hnrnpab	-2.93145	15.8832
Hnrnpc	-1.51835	4.09753e-13	Hnrnpc	-3.73612	12.9511
Hnrnpd	-2.61587	5.09616e-15	Hnrnpd	-3.29916	13.4807
Hnrnpdl	-1.97649	5.04457e-16	Hnrnpdl	-4.05815	9.23563
Hnrnpf	-2.83253	2.67867e-29	Hnrnpf	-3.22184	12.3838
Hnrnpk	-1.60603	2.00504e-08	Hnrnpk	-3.12728	16.2094
Hnrnpl	-1.79717	1.35001e-11	Hnrnpl	-3.95101	7.06963
Hnrnpm	-2.81963	6.54561e-20	Hnrnpm	-3.67945	9.72322
Hnrnpu	-2.74837	4.23435e-11	Hnrnpu	-2.98832	13.9328
Hsdl1	1.80793	1.81845e-15	Hsdl1	-3.0812	5.6419
Hsp90aa1	-4.17323	2.92503e-20	Hsp90aa1	-2.89064	17.5265
Hsp90b1	-2.34451	2.97354e-07	Hsp90b1	-2.9743	16.3685
Hspa12a	2.52326	4.34183e-22	Hspa12a	2.67195	9.05961
Hspa14	-2.83658	6.70358e-20	Hspa14	-5.2311	10.195
Hspa4	-3.49133	2.986e-22	Hspa4	-3.12895	12.392
Hspa8	-2.50831	1.02502e-30	Hspa8	-2.54745	14.1434
Hspa9	-3.34049	6.17881e-20	Hspa9	-2.8747	19.9813
Hspb1	-4.91148	5.57565e-18	Hspb1	-3.75578	7.91184
Hspb11	1.7321	2.4719e-12	Hspb11	-6.96855	16.3388
Hspd1	-3.54703	2.28235e-15	Hspd1	-3.93149	15.6433
Hspe1	-3.06903	3.06849e-25	Hspe1	-4.04986	11.2943
Hsph1	-2.69786	1.4379e-12	Hsph1	-2.45685	11.4536
Hus1	-2.78544	1.43528e-39	Hus1	-5.40872	8.30496
Huwe1	-2.0634	1.09432e-12	Huwe1	-2.43057	12.8001
Hyou1	-2.15632	1.71603e-09	Hyou1	-3.41286	10.6894
Iars	-2.69023	2.16941e-21	Iars	-3.65608	15.8916
Iars2	-2.78921	4.69902e-11	Iars2	-4.10966	10.3995
Ibtk	-1.90585	1.54161e-14	Ibtk	-4.72536	6.47281
Ide	-2.75415	9.90018e-19	Ide	-3.80143	9.78353
Idh3a	-2.53272	1.73143e-20	Idh3a	-3.15063	13.2042
Idh3g	-2.01434	1.31223e-10	Idh3g	-3.18954	5.87413
Ifitm1	-3.59512	7.00103e-17	Ifitm1	-4.51973	7.48172
Igf2bp1	-2.91287	8.49692e-17	Igf2bp1	-5.19357	7.36884
Ilf2	-1.5994	4.25604e-08	Ilf2	-4.39781	10.0915
Ilf3	-1.78601	2.58796e-14	Ilf3	-3.90378	17.4672
Immt	-3.19546	5.6944e-23	Immt	-4.18645	8.35967
Impa2	-3.5911	3.98872e-29	Impa2	-7.36007	9.31188
Impact	-2.18207	2.97271e-18	Impact	-2.22145	5.22357
Impdh2	-2.93816	1.44538e-14	Impdh2	-3.64277	16.1906
Inf2	-2.25846	4.75144e-09	Inf2	-4.8414	13.8365
Ints11	-2.53694	1.37017e-18	Ints11	-4.57301	12.0251
Ints13	-2.14568	1.3005e-19	IntS13	-5.99302	9.62759
Ints2	-2.52063	2.23965e-18	Ints2	-9.69627	6.76875
Ints4	-2.35488	4.72869e-19	Ints4	-2.40969	6.81724
Ipo11	-2.31778	3.35437e-19	Ipo11	-3.99328	5.25085
Ipo5	-3.26885	7.93299e-27	Ipo5	-3.42559	17.2192
Ipo7	-1.93446	1.35562e-10	Ipo7	-2.8625	12.5513
Irak3	-4.07986	2.37137e-84	Irak3	-4.97142	14.9894
Isoc2a	-2.36547	8.10355e-32	Isoc2a	-3.98033	11.0664
Itga3	-2.0568	2.39892e-09	Itga3	-7.34548	15.9715
Itga5	-2.60188	4.6401e-13	Itga5	-4.16401	6.20304
Itga6	-4.01373	1.97071e-41	Itga6	-6.27529	11.0806
Itpa	-1.63513	2.35979e-10	Itpa	-3.85227	14.3353
Ivns1abp	-2.23292	1.35975e-23	Ivns1abp	-3.46791	6.35811
Jagn1	-1.5942	2.846e-13	Jagn1	-2.41818	6.36194
Jam2	-3.35065	3.65576e-33	Jam2	-4.83299	6.67743
Jmjd1c	-2.60445	9.88495e-14	Jmjd1c	-4.47731	7.73703
Jpt2	-2.56478	3.55034e-16	Jpt2	-4.32578	12.1812
Kank2	-2.56114	1.03563e-19	Kank2	-5.64411	5.32418
Kars	-2.61059	4.60685e-25	Kars	-3.27791	12.6915
Kat2a	-2.90546	1.71241e-17	Kat2a	-2.13133	8.83137
Kdm4c	-2.86362	2.0053e-21	Kdm4c	-4.17454	7.74648
Kif15	-3.92113	3.84388e-20	Kif15	-4.72512	6.3052
Kif21a	4.20944	2.1959e-50	Kif21a	4.25952	7.28082
Kif22	-2.83591	3.71172e-08	Kif22	-6.28103	5.65783
Kif23	-3.3297	5.23196e-11	Kif23	-4.26843	8.3349
Kif5b	-1.81274	1.26482e-10	Kif5b	-2.92532	9.17356
Kifc1	-2.58997	1.19414e-10	Kifc1	-5.78168	5.9202
Klf4	-4.87265	1.212e-28	Klf4	-1.2379	8.3588
Kpna2	-2.89367	1.45069e-13	Kpna2	-1.89971	8.90461
Kpnb1	-2.33273	3.28732e-11	Kpnb1	-3.24724	17.5979
Ktn1	-2.26794	1.22762e-11	Ktn1	-2.71915	9.34359
L2hgdh	-2.57008	5.61211e-27	L2hgdh	-6.74058	6.36099
Lama5	-2.8004	7.35096e-10	Lama5	-4.26492	6.22682
Lap3	-3.90342	6.83595e-34	Lap3	-4.23501	7.98312
Larp1	-2.16323	9.7302e-17	Larp1	-2.52986	5.89562
Larp7	-2.42499	2.62048e-15	Larp7	-5.00589	7.85206
Lars	-3.61206	5.37001e-24	Lars	-3.48682	11.8251
Leo1	-2.00447	2.6227e-12	Leo1	-8.85907	6.87154
Letm1	-2.06322	3.82557e-12	Letm1	-7.96657	6.56795
Lias	-1.88404	2.67071e-18	Lias	-4.92557	14.1743
Lig1	-3.23253	2.86244e-17	Lig1	-2.70063	8.74697
Llgl2	-3.08867	1.54911e-08	Llgl2	-8.65035	5.75384
Llph	-2.36332	1.93764e-26	Llph	-7.3246	16.3174
Lman1	-1.51218	9.8589e-12	Lman1	-3.80936	14.5594
Lmnb1	-2.14034	2.49371e-10	Lmnb1	-5.85313	8.91245
Lmtk2	-2.2266	1.44729e-26	Lmtk2	4.30125	11.8425
Lonp1	-2.47729	2.66473e-12	Lonp1	-4.58613	9.25554
Lpcat3	-1.5419	1.0901e-13	Lpcat3	-9.8739	5.55489
Lrpprc	-3.28526	6.93336e-24	Lrpprc	-3.87559	7.6582
Lrrc40	-1.92617	4.71126e-21	Lrrc40	-4.36774	8.50209
Lsm2	-2.07649	1.91676e-10	Lsm2	-5.69599	7.3395
Lsm3	-2.26865	1.0139e-16	Lsm3	-5.27109	11.6897
Lsm7	-2.0189	1.17198e-09	Lsm7	-3.70081	12.0735
Luc7l3	-2.11566	2.95938e-11	Luc7l3	-3.35205	14.5725
Ly6e	-1.60481	9.76268e-08	Ly6e	-4.95843	5.58699
Ly6h	8.80272	1.31345e-47	Ly6h	-2.1663	6.59083
Lyar	-4.09562	7.82181e-37	Lyar	-5.6659	19.1649
M6pr	-2.96196	6.6289e-41	M6pr	-4.23267	15.299
Mad2l1	-2.85328	3.09214e-14	Mad2l1	-3.85784	8.9569
Maged1	2.02684	9.53239e-09	Maged1	-3.69657	5.67525
Magoh	-2.31069	4.72597e-13	Magoh	-3.67198	12.7066
Map1b	1.5959	5.07573e-08	Map1b	-2.24984	5.611
Mapt	2.53959	3.72521e-12	Mapt	-4.39882	10.1675
Mars	-3.23706	3.79271e-25	Mars	-3.73244	12.0325
Mastl	-3.58931	8.52625e-23	Mastl	-6.16286	14.3971
Mat2a	-3.61367	5.23683e-35	Mat2a	-2.20804	7.53594
Mccc2	-1.82413	1.7087e-14	Mccc2	-3.44697	5.85305
Mcl1	-2.59043	9.67183e-29	Mcl1	-3.11408	7.6833
Mcm3	-4.93698	2.99896e-24	Mcm3	-3.20856	10.9329
Mcm4	-4.54662	1.43898e-24	Mcm4	-2.78039	7.28111
Mcm5	-4.81054	2.39026e-29	Mcm5	-4.66264	6.7941
Mcm6	-4.45708	1.10591e-25	Mcm6	-2.15705	5.88372
Mcm7	-3.30271	1.41794e-23	Mcm7	-3.46153	7.72681
Mdc1	-2.91746	4.76641e-26	Mdc1	-2.47479	4.31784
Me2	-2.57844	3.06597e-28	Me2	-5.23956	11.0474
Mecr	-1.84783	6.06267e-17	Mecr	-9.90965	7.05622
Med21	-1.54336	3.14229e-12	Med21	-4.90702	9.84715
Med23	-1.95692	2.45219e-14	Med23	-2.91527	8.9588
Melk	-2.8872	7.58328e-12	Melk	-3.94837	7.57589
Mettl1	-3.19679	1.07227e-19	Mettl1	-10.3557	6.23731
Mettl2	-2.39625	5.27599e-41	Mettl2	-4.73515	5.65606
Mettl3	-1.6334	5.24383e-12	Mettl3	-4.251	7.89258
Mkrn1	-3.38263	2.31816e-42	Mkrn1	-8.77532	8.88881
Mlh1	-2.45966	1.44945e-29	Mlh1	-5.64941	11.9517
Mms19	-1.73894	6.03706e-13	Mms19	-3.53407	10.6956
Mms22l	-3.71246	4.37248e-22	Mms22l	-5.72304	6.05219
Mnd1	-3.30488	2.33254e-30	Mnd1	-6.23428	9.4786
Morc2a	-2.59846	1.73617e-20	Morc2a	-1.22116	5.31099
Morc3	-2.82964	1.30056e-32	Morc3	-8.28107	10.6128
Mri1	-1.75294	1.47588e-09	Mri1	-2.17928	5.04283
Mrm3	-1.59008	5.25788e-09	Mrm3	-5.42466	13.01
Mrpl13	-1.9802	8.50227e-20	Mrpl13	-5.30874	7.64714
Mrpl15	-3.01121	6.61371e-25	Mrpl15	-6.28228	5.89674
Mrpl16	-1.66575	1.28315e-08	Mrpl16	-5.15683	6.29766
Mrpl21	-2.41017	4.48165e-17	Mrpl21	-5.34944	7.27411
Mrpl24	-2.29431	3.26092e-19	Mrpl24	-5.57442	19.0246
Mrpl40	-2.70801	3.84167e-24	Mrpl40	-7.46683	7.93247
Mrpl47	-1.96455	1.00709e-17	Mrpl47	-5.96839	5.05904
Mrpl55	-1.91957	7.56818e-08	Mrpl55	-4.2392	10.9323
Mrps10	-1.54964	1.13907e-14	Mrps10	-2.75442	8.92523
Mrps22	-2.56242	2.34373e-20	Mrps22	-4.2955	6.87009
Mrps31	-2.35694	1.54873e-21	Mrps31	-7.66019	11.1759
Mrps35	-1.55631	2.77459e-10	Mrps35	-3.34301	8.50637
Mrps5	-1.88246	1.46241e-13	Mrps5	-1.61849	5.11295
Mrps9	-2.03237	2.41678e-52	Mrps9	-10.457	7.63381
Msh2	-3.36189	2.08223e-24	Msh2	-2.69144	12.0115
Msh6	-4.47369	4.45362e-24	Msh6	-2.95307	7.87616
Msi1	2.88073	4.0083e-11	Msi1	3.81906	6.91986
Mt1	-2.99812	4.56803e-07	Mt1	-3.16082	9.67474
Mt2	-5.1649	2.89445e-14	Mt2	-3.46093	4.78772
Mtch2	-1.87755	4.69056e-17	Mtch2	-4.36128	6.05726
Mtf2	-3.54384	3.71607e-47	Mtf2	-5.25459	5.35155
Mthfd1	-4.23497	1.53512e-25	Mthfd1	-3.44606	14.5193
Mthfd1l	-2.88973	1.2959e-25	Mthfd1l	-3.47445	14.3485
Mturn	3.96909	4.23536e-41	Mturn	4.20571	7.95413
Mvp	-2.8257	3.52851e-09	Mvp	-5.92477	8.64213
Mxra7	1.89358	1.02767e-15	Mxra7	-5.39576	9.6657
Mybbp1a	-3.88339	1.61244e-19	Mybbp1a	-2.53304	6.30904
Mycbp	-2.39605	4.89882e-17	Mycbp	-4.1031	8.7762
Myef2	-2.26085	6.23233e-13	Myef2	-4.83547	9.00003
Myg1	-2.11389	5.57164e-14	Myg1	-4.36457	13.8506
Myo1c	-2.0577	1.04608e-10	Myo1c	-4.44267	7.75031
Naa15	-2.19669	1.25601e-11	Naa15	-2.40735	10.0521
Naa16	-2.24379	1.56326e-10	Naa16	-5.26798	5.79825
Naa20	-1.94909	1.01857e-23	Naa20	-6.18287	9.86749
Naa25	-2.56827	1.28975e-30	Naa25	-3.73101	6.0413
Naa40	-1.77657	2.23911e-18	Naa40	-3.79825	5.03764
Naa50	-1.77968	1.48009e-11	Naa50	-3.25214	8.57697
Nae1	-1.98067	1.53125e-09	Nae1	-3.36332	13.2999
Nars	-3.39044	5.31766e-30	Nars	-3.12467	15.6936
Nasp	-4.02186	1.64605e-26	Nasp	-3.13387	10.8641
Nat10	-3.22582	3.09024e-31	Nat10	-2.55585	5.97041
Ncaph	-2.30128	6.60847e-08	Ncaph	-2.08242	10.3436
Ncl	-3.39782	1.11501e-22	Ncl	-3.08715	13.7763
Ndufa4	-1.52994	3.89943e-09	Ndufa4	-3.7967	11.9716
Ndufs1	-3.03662	4.1063e-15	Ndufs1	-3.25256	8.61888
Nfatc2ip	-3.77477	1.53188e-81	Nfatc2ip	-9.46206	9.67339
Nfs1	-1.7213	2.61694e-13	Nfs1	-2.26168	8.20026
Nfu1	-2.80555	3.93401e-34	Nfu1	-1.45637	5.79029
Ngrn	-1.59226	4.62485e-09	Ngrn	-4.41405	17.4402
Nhp2	-3.21868	4.52882e-11	Nhp2	-10.8928	6.09689
Nif3l1	-1.77805	7.97803e-12	Nif3l1	-4.09585	5.68503
Nit2	-2.62805	2.24493e-19	Nit2	-5.09709	6.90643
Nmd3	-3.28157	7.73599e-34	Nmd3	-3.98046	7.31056
Nob1	-2.12634	1.41615e-13	Nob1	-2.48303	7.91931
Noc2l	-2.42252	2.0635e-14	Noc2l	-5.8162	6.60489
Nop14	-3.35692	5.46214e-31	Nop14	-6.67894	8.59371
Nop2	-3.38525	3.67561e-30	Nop2	-7.83446	7.02767
Nop58	-3.71801	8.33552e-38	Nop58	-7.73511	5.15199
Nova1	3.02995	1.44414e-08	Nova1	-3.28915	5.44003
Npm1	-2.99449	1.59548e-21	Npm1	-3.64499	14.3301
Nsun2	-3.03195	6.11795e-24	Nsun2	-3.29418	6.42575
Nsun5	-2.51943	1.02283e-14	Nsun5	-5.75745	7.29834
Nudc	-2.50884	2.56551e-10	Nudc	-3.40062	13.4202
Nudcd1	-2.09125	1.51891e-11	Nudcd1	-4.52278	8.02626
Nudcd2	-2.70544	1.12385e-17	Nudcd2	-4.05486	8.13476
Nudt10	3.82764	2.95507e-25	Nudt10	-3.1489	6.70049
Nudt16	1.90261	6.2854e-10	Nudt16	-5.71847	7.61868
Nudt5	-2.3268	4.43628e-32	Nudt5	-3.51324	14.5317
Nudt9	-1.65333	7.11919e-11	Nudt9	-5.68658	5.69933
Nuf2	-2.62731	3.17217e-11	Nuf2	-6.90837	7.5838
Nup133	-2.51401	5.72829e-18	Nup133	-4.05235	5.05006
Nup155	-3.32734	2.26283e-21	Nup155	-2.87831	6.45025
Nup160	-3.42536	3.62453e-29	Nup160	-3.99254	5.40456
Nup210	-1.61932	6.58888e-09	Nup210	-5.96761	11.772
Nup214	-2.12339	9.13759e-26	Nup214	-2.2516	6.35763
Nup54	-2.71187	4.03637e-27	Nup54	-2.92308	7.35411
Nup88	-2.24764	4.90706e-16	Nup88	-5.25254	7.78539
Nusap1	-2.70236	4.50585e-09	Nusap1	-5.15787	8.66501
Nutf2	-1.98119	1.31808e-20	Nutf2	-4.20347	10.2594
Oard1	-2.02854	1.8023e-16	Oard1	-4.35604	8.29658
Odc1	-4.02456	1.36305e-44	Odc1	-4.88323	6.19006
Ogdh	-2.37694	1.21085e-14	Ogdh	-4.17009	11.1186
Ola1	-2.21195	9.21336e-25	Ola1	-3.29193	19.3629
Opa1	-1.69362	1.05442e-10	Opa1	-4.05045	7.62323
Osgep	-2.31045	1.14825e-22	Osgep	-4.07186	10.3706
Otud6b	-1.99734	1.79835e-27	Otud6b	-8.37795	6.09146
Oxnad1	-2.26881	3.58712e-27	Oxnad1	-5.79213	16.2724
Pa2g4	-2.96804	1.75184e-19	Pa2g4	-3.32197	9.91012
Pabpc1	-1.7794	1.23589e-11	Pabpc1	-2.99844	12.026
Pabpn1	-2.42065	1.94476e-08	Pabpn1	-2.87386	6.3778
Pacsin2	-2.11315	2.95518e-13	Pacsin2	-3.99636	8.30061
Paics	-2.98271	7.23879e-20	Paics	-3.40178	14.0118
Pak1ip1	-2.6439	1.98018e-20	Pak1ip1	-3.86049	7.3645
Palm3	-4.67949	5.03729e-43	Palm3	-7.24469	7.56625
Papola	-1.87678	3.35304e-19	Papola	-4.77112	8.79367
Park7	-2.61676	1.14479e-15	Park7	-3.44725	11.2603
Parp1	-2.72623	2.45692e-11	Parp1	-2.62543	10.4549
Parva	4.23386	1.62172e-62	Parva	-3.8273	7.71154
Parvb	-2.60691	2.62373e-23	Parvb	-4.38988	5.45426
Pawr	-2.79943	4.52397e-31	Pawr	-5.50804	11.5062
Pbdc1	-2.79638	1.26795e-17	Pbdc1	-4.94659	7.81118
Pcgf6	-2.89705	1.2691e-21	Pcgf6	-4.68892	6.128
Pck2	-2.81187	8.63824e-20	Pck2	-4.12356	8.62987
Pclaf	-2.50629	1.03176e-12	Pclaf	-4.22241	8.08784
Pcna	-3.51328	4.49599e-25	Pcna	-2.18446	6.66349
Pcnt	-2.72607	2.14338e-16	Pcnt	-2.33885	6.19912
Pcp4	7.33893	1.26939e-10	Pcp4	-1.5136	8.40549
Pdcd10	-2.07891	1.05058e-10	Pdcd10	-3.62709	11.3579
Pdcd2	-2.70054	6.15089e-23	Pdcd2	-4.35137	5.79624
Pdhb	-2.56559	8.61369e-21	Pdhb	-4.23405	12.2594
Pdia3	-2.14443	3.72831e-09	Pdia3	-3.29738	15.5523
Pdk1	-1.71364	4.80412e-17	Pdk1	-4.85755	5.33951
Pdlim1	-2.23439	1.38416e-15	Pdlim1	-5.74663	7.50136
Pds5a	-2.26254	2.25825e-13	Pds5a	-3.45762	9.38857
Pelp1	-2.62583	7.65226e-21	Pelp1	-5.06786	18.8423
Pes1	-2.54361	1.35979e-14	Pes1	-3.39312	6.32761
Pfas	-3.46143	1.14106e-20	Pfas	-4.56437	8.36553
Pfdn1	-1.809	8.12556e-14	Pfdn1	-4.1093	5.11077
Pfdn6	-1.94997	2.32413e-07	Pfdn6	-3.23746	9.61836
Pgam5	-1.52057	8.6026e-14	Pgam5	-5.42897	6.23023
Pgd	-2.40697	2.22097e-14	Pgd	-3.42852	10.3292
Pgm3	-2.15492	5.75596e-12	Pgm3	-4.81401	10.366
Pgm5	4.3725	2.03025e-17	Pgm5	-4.5813	5.08321
Phb	-2.67906	5.52028e-17	Phb	-3.05122	8.05212
Phb2	-2.3028	1.45281e-11	Phb2	-3.73348	8.75143
Phc1	-2.92434	1.18069e-27	Phc1	-7.02836	9.77896
Phf5a	-2.05086	1.65956e-14	Phf5a	-5.16897	8.77873
Pipox	-2.74399	7.38766e-28	Pipox	-7.95988	12.7257
Pir	-3.00771	1.50952e-36	Pir	-6.21949	4.99607
Pitpnb	-1.83503	2.95698e-34	Pitpnb	-4.60296	8.05902
Pitrm1	-3.04527	8.93009e-19	Pitrm1	-3.37052	7.38929
Plaa	-2.34366	3.7753e-15	Plaa	-3.91191	13.883
Plaur	-3.42883	5.33071e-22	Plaur	-3.37861	11.4723
Plcb3	-2.9585	3.75036e-11	Plcb3	-3.82176	5.22351
Plekha7	-1.75935	1.15595e-08	Plekha7	-3.97538	6.0801
Plk1	-2.51631	2.75237e-07	Plk1	-7.74067	5.47868
Pml	-4.1572	8.08159e-40	Pml	-5.07481	6.29366
Pmpca	-1.83331	2.35883e-13	Pmpca	-2.85834	10.9053
Pmpcb	-1.52045	6.0732e-08	Pmpcb	-3.0457	6.07419
Pnpla6	-2.05262	1.35147e-10	Pnpla6	-1.17583	8.66705
Poglut1	-2.63226	1.07744e-59	Poglut1	-8.9745	5.56766
Pola1	-3.96197	8.71833e-25	Pola1	-3.64206	7.50842
Pole	-4.48852	9.67122e-35	Pole	-2.67265	9.67038
Pole2	-3.63813	4.17896e-38	Pole2	-5.95894	6.91472
Polr2b	-2.1652	2.17e-09	Polr2b	-3.05444	14.0505
Polr2h	-2.3363	2.2483e-20	Polr2h	-3.71997	8.62548
Polrmt	-2.47723	7.23553e-08	Polrmt	-3.85323	7.31048
Pou2f1	-1.51392	5.9415e-08	Pou2f1	-8.13181	5.3032
Pou5f1	-8.21807	1.24466e-15	Pou5f1	-8.78487	5.09796
Ppa1	-3.00038	1.56433e-22	Ppa1	-3.74685	15.8174
Ppa2	-2.06355	8.57016e-21	Ppa2	-5.65437	12.2864
Ppan	-2.6124	1.86041e-09	Ppan	-4.49266	5.88601
Ppcs	-1.80819	2.9492e-10	Ppcs	-5.98554	5.19341
Ppid	-3.53219	4.3996e-20	Ppid	-3.33404	15.6317
Ppih	-3.02014	2.02452e-31	Ppih	-3.5621	7.8284
Ppil1	-3.01684	1.81665e-23	Ppil1	-4.85127	6.81215
Ppil3	-2.10048	5.00351e-21	Ppil3	-5.88896	6.6391
Ppip5k2	-1.99013	2.02472e-14	Ppip5k2	-5.68959	5.09858
Ppm1b	-1.82786	9.44803e-20	Ppm1b	-2.19973	8.19532
Ppm1e	3.52156	1.89328e-21	Ppm1e	-6.87419	6.24069
Ppm1g	-2.3124	2.15362e-14	Ppm1g	-2.95889	12.1529
Ppp1ca	-1.71725	1.20647e-08	Ppp1ca	-2.74343	12.6545
Ppp1r12a	-1.68668	7.49429e-10	Ppp1r12a	-2.71493	5.30343
Ppp1r7	-1.65037	1.9234e-20	Ppp1r7	-3.5427	15.3454
Ppp1r9b	2.33764	8.4373e-14	Ppp1r9b	3.15038	6.24168
Ppp4c	-1.86248	2.99999e-10	Ppp4c	-3.69055	12.3871
Ppp4r1	-2.55238	3.43093e-34	Ppp4r1	-1.6131	5.61637
Ppp4r3a	-2.2844	6.99627e-18	Ppp4r3a	-4.2438	10.2241
Ppp6r2	1.83484	7.46872e-15	Ppp6r2	-1.6236	8.10778
Ppp6r3	-2.05831	7.24578e-18	Ppp6r3	-3.48385	7.70734
Prc1	-2.75239	7.93352e-09	Prc1	-7.37562	5.81816
Prdx1	-4.29844	1.39111e-42	Prdx1	-3.40188	10.4864
Prmt3	-2.99013	3.00902e-34	Prmt3	-7.65039	6.09378
Prmt5	-1.9133	5.83089e-13	Prmt5	-3.05363	13.0129
Prmt7	-2.5494	1.05671e-25	Prmt7	-5.9942	5.65214
Prodh	-2.45919	5.3325e-12	Prodh	-5.32366	5.70172
Prpf3	-2.30616	2.19687e-16	Prpf3	-5.20167	11.017
Prpf4	-2.38835	2.55037e-29	Prpf4	-4.72398	5.32462
Prps1	-2.27395	4.35125e-16	Prps1	-3.56413	10.0326
Prpsap1	-1.57708	1.91548e-08	Prpsap1	-3.82465	7.85359
Prune1	-1.51526	2.65074e-09	Prune1	-2.92337	8.2472
Prune2	-2.11025	1.28399e-16	Prune2	-3.34544	6.56977
Psat1	-2.46642	5.52372e-20	Psat1	-3.72218	12.0633
Psma1	-1.63079	6.35616e-09	Psma1	-4.1842	14.1125
Psma2	-1.68363	2.3207e-13	Psma2	-3.93493	9.90698
Psma3	-1.80381	7.05135e-18	Psma3	-3.34717	11.6831
Psma4	-2.37003	1.32039e-13	Psma4	-3.8609	14.5213
Psma5	-1.58488	7.13403e-12	Psma5	-3.39028	10.5151
Psma6	-1.9212	1.17291e-14	Psma6	-3.59722	8.34531
Psmb3	-2.17687	1.52467e-13	Psmb3	-3.6275	15.4477
Psmb7	-1.62484	5.44787e-18	Psmb7	-3.58796	9.54793
Psmc1	-1.98073	3.59811e-10	Psmc1	-3.20113	9.92291
Psmc2	-2.1258	2.76975e-15	Psmc2	-3.11483	15.5139
Psmc3	-2.00414	1.37852e-08	Psmc3	-3.59223	7.99999
Psmc3ip	-2.77072	3.47887e-16	Psmc3ip	-5.98955	9.31399
Psmc4	-2.48829	5.33929e-13	Psmc4	-3.54223	16.0887
Psmc5	-2.51084	2.75846e-14	Psmc5	-3.44826	10.7488
Psmc6	-1.66375	9.78392e-09	Psmc6	-3.09439	16.4667
Psmd1	-2.42616	3.72425e-14	Psmd1	-3.54667	8.86927
Psmd11	-1.83896	6.20514e-25	Psmd11	-2.99003	13.2919
Psmd12	-2.23271	2.00415e-13	Psmd12	-3.95536	13.0752
Psmd13	-2.03956	3.12849e-12	Psmd13	-3.36189	9.95353
Psmd14	-2.33598	2.72236e-16	Psmd14	-3.63044	15.5942
Psmd5	-1.71379	2.11638e-14	Psmd5	-2.75965	10.7396
Psmd6	-2.01032	1.6575e-12	Psmd6	-3.27033	11.9964
Psmd7	-1.9132	5.72086e-11	Psmd7	-3.57395	8.26291
Psme3	-2.4916	5.38485e-29	Psme3	-3.45598	8.65226
Psme4	-2.61844	2.54472e-14	Psme4	-3.30577	7.92398
Psmg1	-2.89028	4.49837e-42	Psmg1	-4.31084	11.7402
Psmg2	-2.43341	8.88489e-28	Psmg2	-4.80931	6.45729
Psph	-2.08847	3.25514e-16	Psph	-5.11246	12.0034
Psrc1	-2.20715	1.3437e-12	Psrc1	-6.0235	9.08006
Ptbp1	-1.94118	1.50098e-07	Ptbp1	-3.19438	13.7507
Ptges3	-2.27172	1.49056e-17	Ptges3	-2.56751	8.05375
Ptpn9	1.6017	5.59809e-13	Ptpn9	-2.08483	6.08149
Pus1	-2.33968	7.44072e-12	Pus1	-6.54153	4.93468
Pus7	-2.85947	7.48722e-28	Pus7	-6.21805	8.42704
Pxdn	1.96857	1.02925e-09	Pxdn	3.65575	5.41419
Pygb	2.15077	9.4265e-12	Pygb	-3.19385	10.24
Pym1	-2.26401	1.98383e-27	Pym1	-2.75476	6.36309
Qdpr	-1.62041	6.60158e-09	Qdpr	-3.62206	11.8907
Rab23	-1.58405	1.97147e-14	Rab23	-4.64331	5.16425
Rab3gap2	-1.52999	1.17487e-11	Rab3gap2	-4.23396	5.39462
Rab6b	3.60107	1.02916e-39	Rab6b	-1.6716	9.36873
Rabggta	-2.65241	1.54478e-20	Rabggta	-3.32817	7.67961
Rabif	-1.8336	1.11627e-14	Rabif	-8.29825	5.16739
Rad21	-1.67885	2.52617e-09	Rad21	6.21445	7.65501
Rad23b	-1.81239	2.31468e-18	Rad23b	-3.39276	15.9805
Rad50	-3.46343	6.22601e-19	Rad50	-4.81147	6.49409
Rad51ap1	-3.19887	3.42557e-35	Rad51ap1	-3.99963	5.74702
Ran	-2.39429	3.47598e-17	Ran	-3.48545	16.9705
Ranbp1	-3.26757	3.88678e-25	Ranbp1	-3.78141	13.9594
Rangrf	-2.71896	1.24327e-09	Rangrf	-7.07623	6.35384
Rars	-3.42075	9.02067e-38	Rars	-3.53083	11.7693
Rbbp4	-1.71394	8.17619e-11	Rbbp4	-2.77088	12.3561
Rbbp5	-2.232	5.90502e-33	Rbbp5	-2.65829	7.09813
Rbbp7	-2.10788	6.70309e-10	Rbbp7	-2.12554	11.9747
Rbm26	-3.03278	6.50624e-11	Rbm26	-4.05214	5.55037
Rbm27	-1.67757	1.96316e-11	Rbm27	-4.75795	5.55858
Rbm3	-2.14401	1.85989e-20	Rbm3	-2.56587	8.97024
Rbm39	-1.87472	9.50938e-10	Rbm39	-2.89525	5.98391
Rbm8a	-2.1989	3.86172e-17	Rbm8a	-3.70433	13.9643
Rbmxl1	-1.76918	1.56819e-09	Rbmxl1	-8.58852	16.6464
Rbp1	4.6274	1.13915e-41	Rbp1	-4.65781	6.73047
Rbpj	-2.69153	4.30365e-21	Rbpj	-1.6963	5.79655
Rbpms	-3.08125	2.71487e-38	Rbpms	-5.57427	5.44146
Rbpms2	-4.01331	2.78151e-38	Rbpms2	-8.87737	20.4362
Rcc1	-2.81697	3.42126e-25	Rcc1	-9.75396	14.7177
Rcc2	-2.30645	1.0196e-11	Rcc2	-3.02854	17.2145
Rcl1	-2.97805	8.44908e-29	Rcl1	-5.58166	12.1215
Rexo2	-2.92993	4.6555e-33	Rexo2	-9.40255	8.31205
Rfc5	-4.42404	2.27009e-38	Rfc5	-3.26466	5.23575
Rhob	3.14059	3.51529e-27	Rhob	-2.90237	6.86983
Rida	-1.79134	6.16409e-12	Rida	-4.01564	5.83972
Riok1	-2.3112	1.07993e-15	Riok1	-5.38115	8.23861
Rnaseh1	-2.33953	8.90683e-25	Rnaseh1	-3.90069	11.5121
Rnaseh2a	-1.71503	1.03015e-07	Rnaseh2a	-6.17303	5.62519
Rnaseh2b	-2.26507	5.51008e-27	Rnaseh2b	-3.90942	8.44716
Rnmt	-1.78058	2.9575e-15	Rnmt	-3.6912	8.06539
Rpa1	-3.46922	5.56051e-28	Rpa1	-4.31743	10.3225
Rpa3	-2.19617	3.19252e-15	Rpa3	-3.67074	5.05709
Rpap1	-2.58079	3.22203e-14	Rpap1	-4.27455	5.05761
Rpl10l	-8.09753	7.76843e-25	Rpl10l	-3.33892	23.6871
Rpl22	-1.90089	8.76926e-09	Rpl22	-3.36707	11.6217
Rpl3	-1.77002	4.31288e-08	Rpl3	-3.14932	12.9537
Rpl30	-1.58518	2.02785e-07	Rpl30	-3.23028	9.18292
Rpl34	-1.91901	2.30231e-08	Rpl34	-3.02416	9.75286
Rpl4	-1.65512	1.54844e-07	Rpl4	-3.33176	18.2495
Rpl7l1	-2.76166	2.69957e-31	Rpl7l1	-3.01398	9.59314
Rpn1	-1.73788	8.37739e-09	Rpn1	-2.50817	11.3648
Rpn2	-1.54126	1.23884e-10	Rpn2	-2.75345	15.9568
Rps25	-1.68065	3.70593e-07	Rps25	-3.30354	13.5071
Rps27l	-2.53194	2.4893e-13	Rps27l	-3.34405	16.0113
Rps6ka1	-2.98963	2.27731e-15	Rps6ka1	-3.17554	10.0503
Rrbp1	-1.65555	1.09697e-07	Rrbp1	-3.94658	8.55188
Rrm1	-2.46059	5.62391e-10	Rrm1	-2.84732	10.0631
Rrp1b	-4.00734	4.68564e-61	Rrp1b	2.84926	5.8953
Rrp9	-3.75317	3.96247e-13	Rrp9	-5.69474	5.71863
Rsl24d1	-1.81922	8.48186e-16	Rsl24d1	-6.37022	10.1433
Rtn1	4.44416	9.60071e-46	Rtn1	-2.93094	5.94807
Ruvbl1	-2.86312	6.61174e-20	Ruvbl1	-3.92763	15.6531
Ruvbl2	-2.13878	1.64537e-07	Ruvbl2	-3.23448	14.1608
Sae1	-2.42585	5.98314e-30	Sae1	-2.89548	22.2633
Samhd1	-2.00736	8.49873e-14	Samhd1	-7.34851	10.08
Samm50	-2.2113	1.82213e-17	Samm50	-4.12462	6.10405
Sarnp	-2.06951	7.12288e-23	Sarnp	-3.87754	6.28629
Scfd1	-2.01543	5.49301e-17	Scfd1	-3.88378	10.3794
Scg2	7.98033	9.68119e-33	Scg2	3.01083	5.67026
Scpep1	-2.66799	2.85234e-23	Scpep1	-2.62907	5.12031
Sdad1	-2.76575	6.05796e-22	Sdad1	-4.5385	13.3809
Sde2	-1.66429	4.90209e-13	Sde2	-3.59829	10.3057
Sdf2l1	-2.42589	8.14156e-11	Sdf2l1	-5.9349	8.51823
Sdha	-2.38318	5.62688e-09	Sdha	-3.45345	6.3596
Sec16a	-1.63928	2.07793e-10	Sec16a	-6.75759	9.98219
Sec23b	-2.14294	2.13483e-10	Sec23b	-4.56891	6.21722
Sec31a	-1.57596	3.05902e-08	Sec31a	-3.81918	16.3291
Sec61a1	-1.7427	4.6134e-11	Sec61a1	-2.16163	9.78602
Sema4b	-2.19438	4.09503e-12	Sema4b	-6.23565	9.55059
Serbp1	-2.44271	8.50234e-24	Serbp1	-3.04536	13.1005
Serpinh1	2.91491	6.8861e-11	Serpinh1	-4.43995	5.94408
Set	-2.83137	3.27523e-29	Set	-3.66492	13.6907
Sf1	-1.50409	1.89429e-12	Sf1	-3.52572	14.6873
Sf3a3	-2.55972	1.11066e-14	Sf3a3	-4.89805	9.15234
Sf3b1	-2.09034	5.66732e-08	Sf3b1	-3.80742	10.2108
Sf3b3	-2.77278	4.34008e-18	Sf3b3	-4.53314	6.77386
Sf3b4	-1.87185	2.13016e-07	Sf3b4	-4.94307	14.9808
Sfpq	-2.6111	1.67617e-12	Sfpq	-2.3305	13.7459
Sgf29	-2.07392	6.82356e-19	Sgf29	-5.19073	7.80152
Sgip1	5.10565	9.61958e-32	Sgip1	-6.69616	19.1952
Shmt2	-3.17628	1.16165e-13	Shmt2	-4.27315	10.4503
Sirt1	-4.22604	2.59972e-38	Sirt1	-5.80252	5.86312
Ska1	-3.6255	1.56682e-20	Ska1	-6.08666	9.77517
Slc12a4	-1.81351	4.16685e-08	Slc12a4	-6.01361	10.0812
Slc16a1	-3.50873	2.04786e-29	Slc16a1	-7.27687	5.13086
Slc25a3	-1.81074	7.786e-14	Slc25a3	-3.46533	9.35804
Slc25a5	-1.95486	1.26423e-09	Slc25a5	-3.0799	10.8445
Slc2a3	-2.59645	8.96208e-15	Slc2a3	-4.89475	12.2154
Slc35f2	-3.89776	5.80999e-27	Slc35f2	-6.70704	7.95871
Slc3a2	-2.95966	3.12505e-25	Slc3a2	-3.46644	8.02616
Slc44a1	-2.26864	8.07769e-34	Slc44a1	-6.11342	5.28152
Slc7a1	-3.66461	2.09352e-51	Slc7a1	-4.11867	11.1965
Slc7a5	-3.55807	2.07572e-25	Slc7a5	-3.77437	6.18865
Smarca5	-2.28696	6.81298e-09	Smarca5	-5.51508	7.111
Smarcad1	-3.28358	1.58216e-28	Smarcad1	-2.88955	5.17195
Smarcc1	-2.23381	3.69968e-11	Smarcc1	-3.43642	15.9968
Smc2	-3.74858	1.50573e-13	Smc2	-2.55284	8.57006
Smg1	-1.7223	5.64188e-09	Smg1	-2.78677	13.2858
Smg5	-2.34574	1.67622e-14	Smg5	-1.1535	11.152
Smn1	-2.14796	3.72692e-25	Smn1	-3.05712	15.9358
Smndc1	-2.04237	3.07646e-21	Smndc1	-3.93449	7.19796
Smu1	-2.22573	1.80474e-11	Smu1	-3.85948	6.22322
Smyd5	-2.88075	3.53252e-23	Smyd5	-4.05743	5.5065
Snap25	5.18873	2.77869e-17	Snap25	-3.73648	7.67409
Snca	5.95056	1.05278e-24	Snca	3.88929	9.58136
Sncb	5.88968	1.86407e-22	Sncb	-1.31876	8.69296
Sncg	2.17104	2.2748e-09	Sncg	-5.05432	5.40715
Snrnp40	-2.03496	3.66495e-27	Snrnp40	-2.20905	5.31133
Snrpa1	-2.33874	4.28665e-16	Snrpa1	-3.72648	10.9912
Snrpb2	-1.7533	1.4044e-09	Snrpb2	-4.42036	8.49793
Snrpd1	-1.56934	7.15352e-10	Snrpd1	-5.35196	8.26921
Snrpd3	-2.08665	3.74575e-16	Snrpd3	-4.01252	15.158
Snrpe	-1.58877	1.3613e-10	Snrpe	-4.01635	11.3812
Snrpf	-1.86777	7.16728e-09	Snrpf	-5.02806	6.35828
Snrpg	-1.59748	1.05827e-10	Snrpg	-5.61231	15.3047
Snrpn	4.95747	2.08606e-22	Snrpn	-4.20123	13.7693
Sntb2	-2.09611	1.28309e-17	Sntb2	-6.14814	13.4957
Snu13	-1.85137	7.652e-15	Snu13	-4.01653	7.30631
Snx2	-2.2197	1.15053e-19	Snx2	-3.03857	14.1124
Snx5	-3.14768	2.12086e-41	Snx5	-3.32742	18.7299
Sod1	-2.17929	2.1744e-15	Sod1	-3.32863	15.0456
Sod2	-1.84934	1.51624e-25	Sod2	-3.72389	12.3813
Spag5	-2.71217	1.8653e-10	Spag5	-3.87474	17.7989
Spc25	-2.4788	5.39908e-10	Spc25	-3.16696	8.6746
Spint1	-3.69388	5.47409e-22	Spint1	-4.71062	13.0215
Spint2	-2.61395	7.83965e-11	Spint2	-4.31737	5.81308
Spp1	-7.52923	1.8749e-27	Spp1	-1.52532	5.26458
Spry2	-3.81705	3.79436e-49	Spry2	-5.88987	11.3844
Spry4	-5.42785	1.11551e-102	Spry4	-7.6343	10.2424
Sptbn1	1.97721	1.83035e-11	Sptbn1	-2.7029	9.6981
Sptlc2	-2.4909	2.56509e-53	Sptlc2	-3.11132	5.98821
Srm	-3.57991	2.60023e-16	Srm	-3.90511	14.6795
Srrm1	-1.86808	1.76146e-14	Srrm1	-7.17149	7.13837
Srrt	-2.74727	2.16621e-16	Srrt	-1.02134	6.63006
Srsf1	-3.236	2.56167e-31	Srsf1	-3.32593	10.2084
Srsf10	-1.92752	1.28877e-11	Srsf10	-6.29752	4.99289
Srsf2	-3.00612	2.31979e-30	Srsf2	-4.74409	8.28731
Srsf3	-2.70323	4.11523e-37	Srsf3	-3.85306	7.41003
Srsf6	-2.68625	2.40686e-33	Srsf6	-3.02002	5.01201
Ssb	-1.97846	4.39673e-07	Ssb	-2.46804	14.0426
Ssbp1	-2.54749	3.26316e-22	Ssbp1	-8.20418	6.30552
Ssrp1	-2.304	1.46226e-10	Ssrp1	-2.2241	5.91482
Stip1	-2.77961	6.63449e-15	Stip1	-2.97844	14.972
Stk24	-1.61476	5.66163e-25	Stk24	-2.68375	5.50032
Stk38	-3.22988	4.05845e-24	Stk38	-5.13987	5.22262
Strap	-1.67735	1.88015e-10	Strap	-2.41437	10.0076
Stt3a	-2.12425	1.71488e-16	Stt3a	-3.13328	8.7478
Sub1	-1.71516	2.51358e-12	Sub1	-3.06079	13.5769
Suclg1	-1.67995	1.77418e-09	Suclg1	-3.42236	7.54007
Suclg2	-1.7324	6.25027e-15	Suclg2	-4.36914	11.716
Sugt1	-2.43326	1.41688e-26	Sugt1	-2.39693	14.4025
Sumo1	-1.58048	2.99079e-10	Sumo1	-3.90604	6.29896
Supv3l1	-2.91261	9.75676e-72	Supv3l1	-4.90966	6.59342
Swap70	-2.43441	3.39237e-22	Swap70	-3.35078	6.60508
Syncrip	-2.19371	1.58106e-12	Syncrip	-2.9375	9.27267
Taf4b	-2.81847	7.10106e-17	Taf4b	-4.45725	8.07498
Tagln2	-3.00428	9.95524e-15	Tagln2	-2.50698	8.48378
Tagln3	3.83479	8.85238e-36	Tagln3	-3.74235	5.46679
Tamm41	-1.78151	5.16683e-18	Tamm41	-5.00055	8.41066
Tarbp2	-2.40962	7.76806e-09	Tarbp2	-6.3429	8.49312
Tardbp	-2.40306	9.55477e-11	Tardbp	-3.42815	13.7593
Tars	-3.35954	6.4978e-24	Tars	-3.41988	12.9215
Tbrg4	-3.2673	1.40264e-30	Tbrg4	-4.05451	6.57466
Tcea1	-2.08463	1.88642e-19	Tcea1	-2.82519	12.1456
Tcea3	-5.63412	5.24651e-46	Tcea3	-4.31187	6.25929
Tceal5	3.20514	7.30743e-08	Tceal5	-1.51521	8.60286
Tcf7l1	-2.07821	1.40496e-17	Tcf7l1	-4.50461	9.60544
Tcof1	-3.3735	1.20171e-15	Tcof1	-4.03291	5.96602
Tdh	-7.23931	1.2877e-38	Tdh	-2.84522	9.30165
Tdp2	-1.97647	1.89821e-11	Tdp2	-3.48157	6.1956
Telo2	-1.7864	1.02503e-07	Telo2	-2.47586	5.62006
Tet2	-3.21992	3.27004e-29	Tet2	-7.4366	8.02571
Tex10	-2.90812	7.82894e-32	Tex10	-3.40036	6.71871
Tex19.1	-5.78247	1.71205e-20	Tex19.1	-5.40064	8.32634
Tex30	-2.17194	4.48265e-10	Tex30	-6.52031	10.3762
Tfam	-2.23303	7.90811e-23	Tfam	-3.10303	8.72498
Tfdp1	-1.78545	3.71811e-21	Tfdp1	-4.57405	6.03837
Tfrc	-2.76401	5.257e-16	Tfrc	-3.16322	8.16045
Tgm1	-4.67983	1.1663e-42	Tgm1	-5.49146	5.88008
Thoc5	-2.12277	2.09798e-16	Thoc5	2.54769	7.22469
Thoc6	-2.09257	4.17505e-08	Thoc6	-4.56007	7.74167
Thop1	-2.28286	4.15978e-07	Thop1	-4.22952	14.3954
Thumpd1	-2.15754	1.05496e-20	Thumpd1	-3.33857	10.7631
Thumpd3	-3.13751	1.68743e-29	Thumpd3	-3.3778	12.1444
Tial1	-2.29534	2.18924e-14	Tial1	-3.06698	10.1923
Tigar	-2.75134	3.56143e-32	Tigar	-3.17808	7.37865
Timeless	-3.77942	4.46769e-20	Timeless	-4.90051	5.44034
Timm23	-2.48171	2.22611e-18	Timm23	-4.80819	10.5491
Timm44	-2.22572	2.60095e-20	Timm44	-4.37673	9.66058
Timm50	-1.85897	1.02667e-07	Timm50	-4.56534	13.1579
Timm8a1	-2.76165	5.46228e-10	Timm8a1	-3.98203	10.4529
Timm9	-1.76038	1.80013e-10	Timm9	-5.97291	7.66857
Tipin	-3.92909	3.99498e-50	Tipin	-5.13453	8.49464
Tjp2	-3.02289	5.54813e-22	Tjp2	-3.859	5.39675
Tk1	-3.17286	5.00393e-14	Tk1	-8.72173	13.7929
Tle4	-2.10001	8.27241e-17	Tle4	-3.37344	6.55373
Tm9sf2	-2.5693	5.79123e-16	Tm9sf2	-3.20598	7.11933
Tma16	-2.82214	9.84587e-59	Tma16	-6.28242	9.85392
Tmco1	-1.86708	2.23532e-15	Tmco1	-2.64154	8.12538
Tmem163	5.32958	1.37681e-47	Tmem163	-3.84993	6.92435
Tmem165	-1.71853	2.04462e-12	Tmem165	-5.49961	5.38397
Tmem209	-3.31768	3.59301e-40	Tmem209	-4.27276	6.24866
Tmem35a	8.06838	1.77639e-35	Tmem35a	-6.59949	7.26
Tmem87a	-2.36606	5.13292e-15	Tmem87a	-9.12231	5.50014
Tmem97	-2.0199	1.1826e-12	Tmem97	-6.50279	12.272
Tmpo	-1.8087	3.73954e-09	Tmpo	-4.30615	9.3595
Tmtc3	-2.37648	3.34543e-11	Tmtc3	-5.31899	9.30055
Tnfrsf10b	-2.26836	1.15796e-22	Tnfrsf10b	-2.25234	7.79664
Tnpo3	-2.01017	3.33249e-18	Tnpo3	-3.32782	12.4867
Tomm22	-1.65483	3.5267e-09	Tomm22	-2.90018	7.20045
Tomm34	-2.19572	8.99818e-24	Tomm34	-5.55348	13.1553
Tomm5	-2.68694	1.94191e-13	Tomm5	-6.66403	6.91623
Tpbg	2.38751	4.33675e-11	Tpbg	-3.96092	5.09196
Tpd52l2	-1.80963	3.2673e-24	Tpd52l2	-3.11118	13.8715
Tpm3	-2.22711	6.02549e-26	Tpm3	-3.102	8.6671
Tpm4	1.57631	2.05653e-08	Tpm4	-3.92664	10.2997
Tpp2	-2.13143	1.62858e-11	Tpp2	-4.08698	12.3122
Tpr	-2.49288	2.91065e-11	Tpr	-2.78495	9.91957
Trap1	-3.35615	2.47066e-42	Trap1	-3.09797	8.11626
Trappc13	-2.22583	1.91558e-27	Trappc13	-4.23633	5.52956
Trim25	-5.15527	1.60418e-42	Trim25	-4.53239	9.05076
Trim28	-2.80643	9.18483e-12	Trim28	-3.29805	14.299
Trip12	-2.98051	5.00718e-21	Trip12	-4.12855	8.7673
Trip13	-4.0639	1.79603e-39	Trip13	-4.97796	10.9977
Trmt10c	-2.49462	1.06456e-23	Trmt10c	-5.50244	6.59799
Trnt1	-2.92467	9.99754e-28	Trnt1	-3.88096	5.60376
Trub1	-2.17197	5.76773e-34	Trub1	-9.69729	10.3754
Tsen15	-2.19922	8.62996e-18	Tsen15	-3.92087	4.68738
Tsfm	-2.2214	7.18257e-15	Tsfm	-3.58662	10.5447
Tspan6	1.72528	2.18429e-09	Tspan6	-4.53623	12.3342
Tsta3	-2.01843	2.09558e-09	Tsta3	-4.75576	10.1324
Ttc39b	-3.88991	6.37522e-33	Ttc39b	-5.92282	5.74257
Tti1	-1.88751	1.74248e-16	Tti1	-5.88596	8.53047
Tuba1c	-2.11136	3.06962e-11	Tuba1c	-2.87204	12.6719
Tuba4a	-4.18618	1.76775e-21	Tuba4a	-3.01114	15.1487
Tubb2a	2.79259	2.04397e-11	Tubb2a	-3.0992	6.58987
Tubb2b	3.14375	2.60767e-22	Tubb2b	-2.6371	11.442
Tubb4a	6.93523	2.80086e-58	Tubb4a	-2.72192	10.0625
Tufm	-2.24916	1.1277e-09	Tufm	-3.60554	13.7195
Twf1	-2.02442	4.56751e-20	Twf1	-2.2963	9.8822
Twf2	-2.6183	5.78244e-11	Twf2	-3.72522	6.14843
Txlng	-3.68607	3.36569e-20	Txlng	-4.83154	18.9467
Txnrd1	-1.97754	1.83592e-14	Txnrd1	-3.24223	13.8286
Tyms	-4.18321	3.23563e-82	Tyms	-3.5547	6.19714
U2af1	-2.38504	9.82294e-24	U2af1	-5.77089	5.73924
U2af2	-1.70742	3.39043e-09	U2af2	-3.52396	9.57445
Uba2	-3.09729	5.07759e-27	Uba2	-2.72824	6.08926
Uba3	-2.02232	2.33587e-13	Uba3	-3.12594	6.14795
Uba5	-1.5483	8.38439e-10	Uba5	-4.10588	11.3009
Uba6	-1.78555	2.61923e-07	Uba6	-3.05807	8.81086
Ubap2	-2.47907	1.70856e-30	Ubap2	-3.01354	7.78876
Ube2d3	-1.78882	9.02959e-12	Ube2d3	-2.78571	5.58867
Ube2t	-2.88666	1.76522e-19	Ube2t	-3.78951	6.16132
Ube3c	-1.99128	5.59376e-29	Ube3c	-6.90923	13.1054
Ublcp1	-2.28389	5.03516e-20	Ublcp1	-4.17089	7.40445
Ubqln4	-2.43424	1.58741e-35	Ubqln4	-3.44667	5.16651
Ubr1	-1.89744	5.22156e-11	Ubr1	-2.45447	8.88897
Ubr4	-1.88862	4.11285e-08	Ubr4	-1.78396	6.28688
Ubr5	-2.72621	6.40567e-25	Ubr5	-1.72081	8.96823
Uchl1	2.02444	1.45564e-10	Uchl1	-2.70943	8.80877
Uchl3	-2.929	2.49391e-18	Uchl3	-3.17411	10.9974
Uchl5	-3.08377	4.89312e-24	Uchl5	-3.11352	11.5258
Uck2	-1.65482	7.43098e-13	Uck2	-3.89305	5.60283
Uggt1	-2.04081	4.56224e-12	Uggt1	-3.74247	9.79403
Umps	-3.99052	2.30648e-49	Umps	-3.00694	10.4702
Ung	-3.92547	8.81593e-19	Ung	-4.58145	8.83062
Uqcrb	-1.54235	2.83267e-07	Uqcrb	-4.6529	5.26938
Uqcrc1	-2.09159	1.53939e-09	Uqcrc1	-2.72784	9.5586
Uri1	-3.1345	8.19392e-34	Uri1	-8.33412	6.72513
Urod	-1.93754	2.27001e-07	Urod	-3.1191	7.80718
Uso1	-1.99455	4.04621e-12	Uso1	-2.83169	10.9656
Usp14	-2.39941	2.66484e-13	Usp14	-2.92266	12.9562
Usp15	-2.39337	4.14182e-17	Usp15	-6.41349	6.75379
Usp7	-2.81543	1.68559e-24	Usp7	-2.87231	8.81705
Usp9x	-2.0589	2.04143e-08	Usp9x	-2.69871	10.6251
Utp4	-3.40825	3.52089e-35	Utp4	-5.20765	5.34532
Utp6	-2.92245	1.76761e-22	Utp6	-1.96877	7.23356
Uxt	-2.86608	1.91658e-25	Uxt	-5.30779	14.2003
Vac14	-1.90959	1.87081e-14	Vac14	-5.52973	10.0231
Vamp2	2.15529	1.89459e-11	Vamp2	-1.98545	9.15674
Vars	-2.52388	1.48346e-08	Vars	-4.34388	13.1969
Vdac2	-2.06696	1.88777e-17	Vdac2	-3.45656	16.4695
Vim	2.43903	1.12204e-09	Vim	-5.08745	11.3129
Vps26a	-2.28211	2.41501e-21	Vps26a	-2.76086	9.49215
Vps33b	-1.57515	1.10058e-09	Vps33b	-5.93077	10.4554
Vps35	-2.03077	1.25045e-11	Vps35	-3.41792	14.3604
Vps4b	-1.81213	1.98408e-12	Vps4b	-3.28847	6.90778
Wars	-2.2574	6.83315e-13	Wars	-3.40035	10.799
Wasf2	-2.40527	1.0361e-26	Wasf2	-5.56766	5.43934
Washc2	-2.28804	5.68644e-14	Washc2	-3.31742	14.3872
Wdr12	-3.13694	4.57985e-41	Wdr12	-3.5698	9.03434
Wdr18	-2.24096	1.34764e-10	Wdr18	-2.88134	11.2692
Wdr5	-2.95889	3.57622e-33	Wdr5	-4.44118	7.25882
Wdr62	-2.258	8.97811e-13	Wdr62	-2.80432	5.67314
Wnk1	-1.64919	1.77772e-12	Wnk1	-3.70728	8.18805
Wnk2	4.49905	1.30512e-39	Wnk2	-6.13456	7.72564
Xpo1	-2.76556	3.28757e-14	Xpo1	-3.91433	10.7311
Xpo5	-2.33812	4.45274e-17	Xpo5	-3.41808	8.31183
Xpo7	-1.79523	9.26731e-20	Xpo7	-2.40123	6.00512
Xpot	-2.73462	3.16634e-34	Xpot	-3.20451	7.86424
Xrcc1	-1.74912	1.47245e-08	Xrcc1	-5.34588	5.91331
Xrcc5	-3.56166	9.20946e-35	Xrcc5	-4.57055	10.0716
Xrcc6	-2.59659	3.32312e-19	Xrcc6	-6.02848	11.3639
Xrn2	-2.81676	6.94955e-18	Xrn2	-3.43613	8.66579
Yars	-2.15976	9.61413e-15	Yars	-3.16178	7.79802
Yars2	-3.50383	3.3842e-27	Yars2	-5.52102	6.70355
Ybx3	-2.89912	3.31458e-55	Ybx3	-3.51196	13.1755
Yipf5	-1.56319	6.43246e-13	Yipf5	-2.80755	7.05581
Ywhaq	-1.56336	3.50264e-14	Ywhaq	-3.03737	13.0229
Znhit3	-1.66991	8.35689e-09	Znhit3	-6.06247	9.37304
Znhit6	-2.51034	7.19698e-34	Znhit6	-9.43922	6.4467
Zscan10	-6.25158	1.73296e-64	Zscan10	-7.10231	6.48661

## Sheet: AHARIBO-tC RNA vs pSILAC
geneSymbol	RNA logFC	PValue	gene ID	protein trnover EN/mESC	p-value
Abat	2.95277	4.85848e-24	Abat	-2.55461	7.84982
Abce1	-2.43783	1.33285e-17	Abce1	-2.77087	9.32219
Acadm	-1.66075	9.576e-08	Acadm	-3.45507	14.9734
Acat1	1.61477	8.15726e-11	Acat1	-3.46003	11.2976
Acot1	1.73002	2.43117e-08	Acot1	-7.7514	9.44515
Acot9	-3.53171	1.52168e-44	Acot9	-3.71832	5.60385
Acp6	-2.96918	6.34288e-34	Acp6	-5.07122	8.11471
Acta2	6.27817	2.40901e-12	Acta2	-2.8506	11.2277
Actl6a	-2.08221	1.24541e-12	Actl6a	-3.75914	13.8523
Actn1	-1.64754	2.2891e-09	Actn1	-4.5546	8.85235
Actr1a	2.02915	1.79554e-14	Actr1a	-3.65094	14.3142
Adal	-1.59205	3.39123e-11	Adal	-2.22152	6.97109
Adat1	-1.90665	2.7218e-17	Adat1	-6.33443	6.32333
Add1	1.90301	1.50291e-12	Add1	-2.25744	8.34001
Adk	-3.59408	3.59958e-28	Adk	-4.61724	13.0706
Adsl	-2.06551	4.23692e-12	Adsl	-4.20835	15.848
Adss	-2.3961	1.60899e-16	Adss	-3.8115	16.6713
Agap3	2.10646	6.4629e-09	Agap3	-3.8246	6.59803
Agpat2	-3.34939	4.20096e-18	Agpat2	-5.63275	18.9409
Agtrap	-2.7806	1.85623e-16	Agtrap	-8.6057	11.8115
Akap12	-1.94447	2.83751e-09	Akap12	-2.29794	6.74628
Akap9	1.68808	2.56493e-11	Akap9	-2.14111	7.16497
Akr1b8	-3.75611	3.90146e-19	Akr1b8	-6.00441	5.42757
Akt1	3.2657	6.58506e-16	Akt1	-2.07786	8.63413
Alcam	5.32951	1.19127e-39	Alcam	-2.18363	4.92228
Aldh1l1	2.25318	2.78639e-16	Aldh1l1	-5.53589	9.47438
Alg13	-4.16982	4.81812e-34	Alg13	-3.07628	5.56981
Anp32b	-2.1799	9.00894e-14	Anp32b	-3.24235	13.6737
Anxa11	-2.84797	5.32948e-12	Anxa11	-7.25966	5.28135
Anxa2	2.72729	3.71577e-16	Anxa2	-2.08739	7.61815
Anxa7	-2.3012	1.82513e-15	Anxa7	-4.49293	16.7753
Ap3b1	-1.65761	3.86476e-18	Ap3b1	-3.69709	6.83141
App	4.64991	9.23913e-71	App	2.90431	5.9351
Aqr	-1.79978	2.62337e-08	Aqr	-4.23646	6.94726
Arhgap8	-4.0276	2.485e-34	Arhgap8	-3.76065	5.44122
Arhgef7	1.67246	2.08123e-16	Arhgef7	-1.72811	5.46783
Arl3	2.0559	1.36064e-18	Arl3	-3.05348	6.36175
Arl8a	3.2239	6.22296e-32	Arl8a	-3.36474	14.5078
Asah1	-2.10296	1.53068e-22	Asah1	-1.24238	8.04698
Asf1b	-1.95237	5.0109e-08	Asf1b	-4.77342	8.40195
Ash2l	-2.12675	4.71649e-25	Ash2l	-5.07211	7.09146
Asns	-2.86844	3.28543e-24	Asns	-3.29344	6.7735
Ass1	-4.15658	1.69843e-30	Ass1	-1.46821	7.21655
Atf1	-2.34797	8.80825e-25	Atf1	-5.11816	9.14103
Atic	-3.12628	4.46565e-21	Atic	-4.02997	9.25146
Atm	-1.83596	2.73547e-08	Atm	-5.12741	9.29754
Atp1a2	13.0014	1.78914e-29	Atp1a2	2.90177	7.47211
Atxn3	-1.58051	1.08905e-17	Atxn3	-4.40595	5.09337
Babam2	-2.74739	3.45696e-19	Babam2	-7.00382	8.00148
Bag2	1.66231	1.09965e-08	Bag2	-5.95373	7.14378
Basp1	2.92456	2.93843e-18	Basp1	-4.48029	9.82753
Bcap31	-2.21985	7.23924e-19	Bcap31	-3.71216	7.73167
Bcat1	-1.84158	2.32506e-21	Bcat1	-3.08229	12.0647
Bcat2	-3.12838	1.27528e-22	Bcat2	-6.62724	5.0632
Bckdhb	-3.07887	2.25524e-56	Bckdhb	-1.94194	7.65339
Bclaf1	-2.15457	1.41178e-12	Bclaf1	-5.59933	8.61992
Bin1	4.31128	2.75565e-33	Bin1	-4.53843	6.62072
Bri3bp	1.57413	2.86077e-11	Bri3bp	-5.01187	8.89531
Brix1	-2.7251	7.02645e-29	Brix1	-5.08938	6.7283
Brsk2	6.7915	5.97298e-89	Brsk2	3.89734	5.24349
C1qbp	-1.98611	3.43267e-11	C1qbp	-4.29878	12.0752
C2cd5	-1.62135	2.61412e-22	C2cd5	-3.31193	8.32
Cacybp	-2.23386	4.48643e-12	Cacybp	-2.91186	10.7426
Cadm4	4.23714	3.37313e-31	Cadm4	3.31844	5.64476
Cand2	1.5765	1.17673e-07	Cand2	-2.67752	5.22957
Canx	-1.56226	1.55368e-08	Canx	-3.13506	16.4982
Cars	-2.84751	5.18637e-32	Cars	-3.85652	10.1368
Cask	1.66056	5.217e-14	Cask	-2.13084	14.7162
Casp6	2.15743	1.3705e-12	Casp6	-3.46624	6.96319
Cbwd1	-2.07762	4.00199e-20	Cbwd1	-3.97098	7.53936
Ccar1	-1.53914	1.36434e-07	Ccar1	-3.05051	10.4186
Cct3	-1.82729	2.95654e-08	Cct3	-3.30219	10.0155
Cct8	-1.96541	1.23063e-08	Cct8	-3.19832	10.218
Cdc42bpb	1.90963	1.25887e-09	Cdc42bpb	-2.40717	7.95467
Cdc45	-3.60891	2.32764e-29	Cdc45	-4.03962	9.27477
Cdk1	-2.15565	1.31715e-07	Cdk1	-1.55028	5.94485
Cdk12	-2.10132	8.75126e-15	Cdk12	-6.91966	7.20774
Cenph	-3.61295	5.06907e-25	Cenph	-5.96812	9.85584
Cep290	-2.15504	4.2612e-07	Cep290	-2.45558	12.7608
Cep55	-3.74145	2.93701e-15	Cep55	-6.08294	7.15699
Cfl2	1.83151	7.63756e-12	Cfl2	-3.85907	6.06407
Chaf1b	-3.24863	1.07418e-24	Chaf1b	-6.02464	6.10516
Chek1	-3.83459	1.38308e-29	Chek1	-8.8776	7.71681
Chordc1	-1.75139	4.25194e-08	Chordc1	-2.66737	6.21322
Cisd3	-3.04772	9.26967e-17	Cisd3	-6.77181	8.05453
Ckb	3.14845	1.64099e-08	Ckb	-2.76238	11.1887
Clpb	-2.28043	5.34162e-19	Clpb	-4.30338	9.79017
Cluh	-2.09037	1.43773e-10	Cluh	-3.72846	13.216
Clvs1	5.97311	7.14095e-26	Clvs1	-1.14124	9.63117
Clybl	-2.23934	2.27118e-12	Clybl	-3.95896	6.8569
Cnbp	-1.58122	1.40563e-09	Cnbp	-2.83918	5.69082
Cnot10	-1.56821	2.52476e-14	Cnot10	-6.19487	5.9855
Cobl	-3.49139	1.61704e-30	Cobl	-4.2291	18.7887
Col3a1	13.9747	2.72524e-36	Col3a1	-4.57042	13.5142
Commd10	-1.65308	7.34225e-18	Commd10	-5.4269	6.31587
Cops2	-1.8161	8.88392e-12	Cops2	-3.21669	12.239
Cops3	-1.67296	3.01755e-12	Cops3	-3.7175	9.38294
Coq3	-1.84799	2.91972e-15	Coq3	-6.97228	10.4389
Coro1a	2.61954	8.02329e-18	Coro1a	-5.29393	7.61363
Cotl1	2.88532	4.17204e-09	Cotl1	-3.97507	8.40396
Cplx2	7.3366	3.85219e-86	Cplx2	-2.33813	6.93951
Cpped1	-1.57177	4.369e-15	Cpped1	-4.00843	6.85945
Crabp2	3.88365	2.49116e-26	Crabp2	-6.35273	7.48077
Crlf3	-2.43696	8.22887e-44	Crlf3	-3.90057	5.02803
Crmp1	3.71044	2.86065e-24	Crmp1	-4.15751	8.12792
Cse1l	-2.74697	1.47463e-14	Cse1l	-3.15617	14.9574
Cstf3	-2.93219	3.25904e-17	Cstf3	-6.65452	5.8615
Cth	-5.63472	7.73755e-68	Cth	-2.55312	6.99016
Ctnna1	-2.52741	2.56323e-15	Ctnna1	-3.34227	9.5527
Cul2	-1.86334	4.54505e-09	Cul2	-3.46718	5.72915
Cul4b	-3.11291	1.78947e-16	Cul4b	-3.3994	7.24601
Cxadr	2.03018	1.28342e-26	Cxadr	-5.08446	6.44244
Cyp20a1	-2.25599	8.55103e-22	Cyp20a1	-5.71064	9.73035
Dach1	7.06538	2.93144e-48	Dach1	4.145	7.61494
Dars	-1.92669	3.96906e-14	Dars	-2.96927	12.4165
Dars2	-2.59668	1.13253e-20	Dars2	-5.981	12.5317
Dcaf7	2.06083	6.78999e-19	Dcaf7	1.20188	6.72773
Dcps	-1.83236	2.34291e-17	Dcps	-3.63442	12.3274
Ddah2	3.6349	3.64361e-13	Ddah2	-3.87001	8.46077
Ddx11	-2.48922	2.86666e-11	Ddx11	-6.21531	11.6904
Ddx20	-2.74274	2.73686e-20	Ddx20	-5.39027	8.30764
Ddx27	-2.15761	6.28074e-13	Ddx27	-3.33266	5.98728
Ddx4	-3.84279	2.27806e-22	Ddx4	-2.95907	7.08409
Ddx46	-1.7204	1.9664e-08	Ddx46	-3.60634	6.48242
Def6	-2.53977	3.84445e-07	Def6	-7.317	9.32826
Degs1	-1.88636	5.24335e-17	Degs1	-3.46297	7.28275
Dek	-2.33807	1.29697e-15	Dek	-4.74031	8.16041
Dera	-1.72057	8.22279e-19	Dera	-2.87428	5.60385
Dhfr	-3.49346	2.65812e-38	Dhfr	-4.70191	6.95076
Dhodh	-2.04707	7.47887e-14	Dhodh	-4.70452	6.07826
Dhx15	-1.58439	3.70694e-07	Dhx15	-3.57919	11.239
Dhx29	-1.82831	3.14919e-09	Dhx29	-2.98597	9.14991
Dhx9	-2.46459	1.33121e-14	Dhx9	-3.22516	12.4075
Diablo	-1.8574	2.54332e-09	Diablo	-7.06695	6.33857
Diaph1	-2.21426	2.30849e-09	Diaph1	-3.66156	16.0342
Dido1	-2.05381	1.54929e-13	Dido1	-5.25594	5.17419
Dimt1	-2.21006	3.53959e-19	Dimt1	-5.8236	6.82149
Dis3	-3.23938	6.43351e-22	Dis3	-3.38148	8.62133
Dkc1	-3.32467	2.8042e-36	Dkc1	-7.79032	5.40242
Dlg1	-1.81401	2.32841e-15	Dlg1	-12.2188	5.44689
Dlgap5	-2.73759	1.37196e-07	Dlgap5	-3.2169	7.77863
Dna2	-3.26654	1.11195e-16	Dna2	-6.40632	21.4087
Dnajb11	-1.54299	2.87223e-10	Dnajb11	-3.90981	9.08339
Dnajc2	-2.67059	4.37001e-18	Dnajc2	-5.42682	9.01894
Dnajc21	-3.04621	5.01867e-42	Dnajc21	-4.49465	7.51864
Dnajc8	-1.69034	1.64385e-13	Dnajc8	-3.86853	9.03871
Dock6	-1.78104	3.10937e-07	Dock6	-2.7662	6.40009
Dph5	-1.88404	2.46761e-18	Dph5	-3.92127	4.94046
Dpp7	-2.35046	2.23785e-12	Dpp7	-6.4262	7.64395
Dpysl2	5.44475	1.36249e-53	Dpysl2	-3.39232	11.8874
Dstn	-1.52982	3.66132e-13	Dstn	-2.88586	15.2117
Dtd1	-1.61202	3.76758e-11	Dtd1	-6.11972	5.38759
Dtymk	-2.39588	4.06495e-35	Dtymk	-4.26086	8.89061
Dynll2	2.97463	6.05341e-24	Dynll2	-2.97063	10.4851
Ebna1bp2	-2.30471	8.51874e-15	Ebna1bp2	-5.81035	17.9963
Echdc2	-1.8091	1.51754e-08	Echdc2	-5.61514	6.2475
Ect2	-3.30254	4.79836e-13	Ect2	-2.8561	12.6357
Eef1e1	-2.51814	2.17708e-28	Eef1e1	-3.00114	10.4653
Efnb1	5.99411	1.75194e-57	Efnb1	-1.09536	7.37931
Efnb3	4.68559	1.03421e-34	Efnb3	3.54296	5.11173
Eftud2	-1.75174	1.65565e-08	Eftud2	-2.68112	7.73843
Egln1	3.88716	2.87218e-34	Egln1	-1.21677	13.3709
Eif1a	-3.08933	4.35686e-34	Eif1a	-2.38838	9.7225
Eif2a	-2.27428	1.72768e-19	Eif2a	-4.34688	7.7898
Eif2ak2	-2.2323	4.43176e-18	Eif2ak2	-3.60708	6.91422
Eif2d	-2.34288	7.58966e-29	Eif2d	-5.55239	11.8394
Eif2s1	-2.60927	1.37171e-23	Eif2s1	-3.5414	8.95267
Eif2s2	-2.72991	1.97768e-28	Eif2s2	-3.27716	10.7398
Eif3c	-1.66047	1.0164e-07	Eif3c	-3.44522	13.098
Eif3e	-1.64744	1.37004e-09	Eif3e	-3.18126	14.6843
Eif3j2	-1.81994	1.44983e-07	Eif3j2	-4.31383	12.241
Eif3l	-1.62094	5.67218e-11	Eif3l	-3.71615	10.965
Eif4a1	-1.85618	5.87361e-13	Eif4a1	-2.67925	10.3195
Elac2	-2.78162	1.09954e-17	Elac2	-3.98187	9.57775
Elavl3	4.72141	9.73535e-47	Elavl3	-0.530865	9.33723
Emb	-3.14438	1.85492e-18	Emb	-5.8742	5.76696
Enah	-1.53409	1.16921e-16	Enah	-2.78944	10.2773
Enox1	-3.78959	3.18427e-20	Enox1	-1.62338	5.36967
Epb41l2	-1.77608	3.79384e-13	Epb41l2	-4.32381	7.95851
Epha2	-3.26429	1.46804e-11	Epha2	-1.71722	7.66213
Eprs	-2.5761	2.30505e-13	Eprs	-3.43803	8.71084
Erh	-1.84905	1.20394e-13	Erh	-3.52627	11.7694
Ermp1	-1.88498	1.77844e-13	Ermp1	-4.75267	8.55193
Esf1	-2.98355	9.35834e-17	Esf1	-5.68126	19.7727
Etf1	-2.33186	9.45188e-24	Etf1	-3.66063	13.2692
Etfa	-1.50802	7.60465e-11	Etfa	-2.9553	15.6492
Ewsr1	-1.82061	7.175e-11	Ewsr1	-3.62225	11.5387
Exosc2	-2.33847	3.55253e-23	Exosc2	-7.89758	8.94699
Exosc7	-1.65395	8.10871e-18	Exosc7	-6.71436	14.1032
Exosc8	-1.7258	2.62892e-12	Exosc8	-7.26941	9.81586
Fabp5	3.7462	1.60172e-20	Fabp5	-3.53971	6.59309
Fads1	1.90224	7.16568e-19	Fads1	-3.32601	10.1235
Faf1	-2.31108	4.51975e-26	Faf1	-4.12336	9.5262
Fam169a	-3.50013	1.61648e-14	Fam169a	-3.84979	10.5661
Fam98a	-1.61057	3.44123e-08	Fam98a	-7.65817	6.51981
Fanci	-3.88296	3.18036e-27	Fanci	4.32776	18.5768
Farsb	-3.10307	2.92148e-63	Farsb	-4.053	17.2085
Fbxo22	-2.1853	6.77209e-38	Fbxo22	-3.59468	5.53409
Fen1	-2.26065	6.55986e-11	Fen1	-4.19042	6.49235
Fhl1	1.7921	1.21745e-12	Fhl1	-6.09888	10.1535
Fignl1	-3.83417	8.81646e-23	Fignl1	-4.29492	6.5986
Fkbp5	-2.63274	3.69462e-54	Fkbp5	-4.27526	9.51022
Flnc	4.31537	1.24119e-25	Flnc	-2.94583	6.92308
Fn3krp	1.60666	1.5408e-10	Fn3krp	-5.0075	8.88741
Fpgs	-2.11621	9.28062e-09	Fpgs	-7.81389	4.97835
Frrs1	-5.75413	1.96778e-125	FRRS1	-5.85271	13.8446
Ftsj3	-3.87226	2.73982e-27	Ftsj3	-8.6647	18.9717
Fxr1	-1.53993	5.02671e-09	Fxr1	-2.47796	8.4378
G3bp1	-1.72849	1.03009e-14	G3bp1	-3.4585	14.8452
Galk2	-1.63758	8.9914e-16	Galk2	-5.21925	6.14153
Gars	-1.66849	2.13218e-09	Gars	-2.92411	9.95313
Gart	-3.35512	9.79605e-18	Gart	-3.65357	12.6142
Gbx2	-2.31942	6.53031e-08	Gbx2	-5.2034	7.18456
Gcsh	-1.87184	1.63696e-10	Gcsh	-5.03887	12.3062
Gdi1	3.3345	2.47469e-24	Gdi1	-2.01309	10.6328
Gemin5	-2.28787	3.0772e-15	Gemin5	-3.8954	5.64503
Gfm1	-2.34428	4.52562e-10	Gfm1	-3.98878	14.463
Gfm2	-2.41671	1.82223e-16	Gfm2	-5.78413	6.37318
Gfpt2	-3.50543	5.91884e-36	Gfpt2	-3.10981	10.3261
Ggact	-2.54903	9.96629e-17	Ggact	-2.33839	5.52261
Gid8	-1.72406	2.08947e-17	Gid8	-3.68609	11.8947
Gins1	-3.43882	6.96545e-30	Gins1	-4.05415	8.94189
Gins3	-2.33931	2.87334e-23	Gins3	-5.98222	13.3922
Glb1	-2.3694	2.34912e-26	Glb1	-11.0536	6.34938
Gldc	-4.19576	1.63163e-19	Gldc	-6.33778	5.13826
Glmn	-1.53729	2.97287e-07	Glmn	-3.15187	9.68813
Glrx	1.71469	4.20131e-10	Glrx	-2.68132	6.94629
Glud1	-1.70406	1.53461e-13	Glud1	-3.15605	11.3537
Gnas	2.96245	8.77313e-48	Gnas	-2.63947	9.13643
Gnb1	1.72687	7.65701e-16	Gnb1	-3.52268	11.111
Gng3	3.64643	8.37137e-17	Gng3	-4.9041	5.74198
Gnl2	-1.98508	5.05977e-13	Gnl2	-2.03161	6.71137
Gnl3	-3.37227	1.52565e-29	Gnl3	-2.27037	9.53576
Gnpda1	-3.02947	5.49827e-29	Gnpda1	-3.76322	6.10109
Got1	-1.50449	1.84413e-11	Got1	-3.25736	13.1853
Gpa33	-6.69203	2.66063e-40	Gpa33	-7.09435	10.921
Gpd2	-3.39116	1.4453e-19	Gpd2	-3.39626	5.03407
Gpm6a	9.09481	1.14992e-76	Gpm6a	4.14005	8.00091
Gsk3b	2.17221	1.2294e-36	Gsk3b	-4.56895	6.05706
Gsr	-2.26805	3.21253e-18	Gsr	-4.02773	13.4306
Gsta4	-2.18108	9.60782e-13	Gsta4	-3.11982	7.57237
Gstm5	2.46437	3.52549e-13	Gstm5	-3.48404	5.3222
Gstm7	5.7382	1.3135e-39	Gstm7	-2.79939	9.91403
Gtf2f2	-2.20664	2.10095e-28	Gtf2f2	-4.36752	9.34343
Gtse1	-2.54783	8.96388e-11	Gtse1	-4.2493	10.8779
Haghl	2.96035	9.99344e-12	Haghl	3.44031	5.48879
Hat1	-4.02514	6.52741e-30	Hat1	-3.26919	5.27245
Hck	-5.28197	8.20253e-51	Hck	-4.03503	6.21731
Hdac1	-2.52197	8.69981e-22	Hdac1	-3.0644	9.60025
Hddc3	3.46206	8.54841e-20	Hddc3	-7.11512	14.2003
Hdgfl3	4.42306	1.03825e-50	Hdgfl3	-8.30733	9.56268
Heatr3	-1.88078	1.71453e-14	Heatr3	-3.68056	10.5627
Hells	-5.29009	5.52134e-31	Hells	-4.43678	5.84225
Herc4	-2.95314	1.47241e-18	Herc4	-3.84989	6.93998
Hibadh	-2.11023	2.4853e-21	Hibadh	-5.00371	6.51547
Hibch	-1.55183	2.48849e-09	Hibch	-5.39298	5.20769
Hikeshi	-1.571	2.26415e-13	Hikeshi	-4.25263	8.92468
Hip1	2.3695	2.70217e-19	Hip1	-2.39161	5.62679
Hirip3	-2.49804	9.4225e-17	Hirip3	-4.1726	5.36907
Hk1	2.3389	1.80278e-09	Hk1	-3.77717	6.83786
Hmces	-4.25902	4.65867e-73	Hmces	-5.18479	5.29259
Hmgcs1	1.60607	2.78758e-07	Hmgcs1	-1.35432	7.12134
Hmmr	-3.38855	1.58478e-10	Hmmr	-7.61247	6.18455
Hnrnpf	-2.12675	3.94639e-18	Hnrnpf	-3.22184	12.3838
Hnrnpm	-1.61407	4.6032e-08	Hnrnpm	-3.67945	9.72322
Hsd17b12	-1.82378	1.07742e-15	Hsd17b12	-2.65634	9.74284
Hsdl1	2.74497	4.00478e-33	Hsdl1	-3.0812	5.6419
Hsp90aa1	-2.95562	5.02185e-12	Hsp90aa1	-2.89064	17.5265
Hspa12a	3.82887	1.66158e-45	Hspa12a	2.67195	9.05961
Hspa14	-1.88705	2.74798e-10	Hspa14	-5.2311	10.195
Hspa4	-2.36771	5.11183e-12	Hspa4	-3.12895	12.392
Hspa8	-1.8344	5.94466e-18	Hspa8	-2.54745	14.1434
Hspa9	-3.07862	1.52615e-17	Hspa9	-2.8747	19.9813
Hspb1	-2.95947	1.5938e-08	Hspb1	-3.75578	7.91184
Hspb11	1.85986	5.06109e-12	Hspb11	-6.96855	16.3388
Hspd1	-3.04178	3.59707e-12	Hspd1	-3.93149	15.6433
Hus1	-2.26125	3.09481e-28	Hus1	-5.40872	8.30496
Iars	-1.98497	5.70522e-13	Iars	-3.65608	15.8916
Iars2	-2.17494	1.42125e-07	Iars2	-4.10966	10.3995
Ide	-2.34037	2.28339e-14	Ide	-3.80143	9.78353
Idh3a	-1.6436	5.76596e-10	Idh3a	-3.15063	13.2042
Igf2bp1	-2.15242	2.24418e-10	Igf2bp1	-5.19357	7.36884
Ilk	2.34626	7.65934e-21	Ilk	-1.88059	6.87414
Immt	-2.52193	1.05763e-15	Immt	-4.18645	8.35967
Impa2	-3.17036	1.48362e-23	Impa2	-7.36007	9.31188
Ints13	-1.55374	1.28673e-11	IntS13	-5.99302	9.62759
Ints2	-1.7436	3.93951e-10	Ints2	-9.69627	6.76875
Ints4	-2.08333	1.26539e-15	Ints4	-2.40969	6.81724
Ipo11	-2.37396	4.51209e-20	Ipo11	-3.99328	5.25085
Ipo5	-2.43803	1.18658e-16	Ipo5	-3.42559	17.2192
Ipo7	-1.92718	1.54141e-10	Ipo7	-2.8625	12.5513
Irak3	-5.57887	1.00939e-133	Irak3	-4.97142	14.9894
Itga5	-1.90445	4.63466e-08	Itga5	-4.16401	6.20304
Itga6	-3.25452	8.06471e-30	Itga6	-6.27529	11.0806
Ivns1abp	-1.52375	2.56991e-12	Ivns1abp	-3.46791	6.35811
Jam2	-2.71733	1.36113e-23	Jam2	-4.83299	6.67743
Jmjd1c	-1.96065	9.28562e-09	Jmjd1c	-4.47731	7.73703
Jpt2	-1.76331	8.19842e-09	Jpt2	-4.32578	12.1812
Kars	-1.85619	4.21506e-14	Kars	-3.27791	12.6915
Kdm4c	-2.23662	2.62881e-14	Kdm4c	-4.17454	7.74648
Kif15	-3.62605	6.31785e-18	Kif15	-4.72512	6.3052
Kif21a	5.4828	1.01131e-76	Kif21a	4.25952	7.28082
Klf4	-2.0631	9.10044e-08	Klf4	-1.2379	8.3588
Kpna2	-2.81041	5.71336e-13	Kpna2	-1.89971	8.90461
Ktn1	-1.76448	7.95277e-08	Ktn1	-2.71915	9.34359
Kyat3	-2.24484	1.24566e-16	Kyat3	-3.77787	8.68184
L2hgdh	-2.23311	2.46117e-21	L2hgdh	-6.74058	6.36099
Lap3	-3.09935	1.68212e-23	Lap3	-4.23501	7.98312
Larp7	-2.04107	1.39581e-11	Larp7	-5.00589	7.85206
Lars	-2.96539	1.26272e-17	Lars	-3.48682	11.8251
Lig1	-2.15836	3.58431e-09	Lig1	-2.70063	8.74697
Llph	-2.04933	6.22738e-20	Llph	-7.3246	16.3174
Lrpprc	-3.07743	1.39358e-21	Lrpprc	-3.87559	7.6582
Lrrc40	-1.62156	1.1185e-15	Lrrc40	-4.36774	8.50209
Luc7l3	-1.73763	3.25251e-08	Luc7l3	-3.35205	14.5725
Ly6h	11.2723	2.12253e-56	Ly6h	-2.1663	6.59083
Lyar	-3.00569	2.07695e-22	Lyar	-5.6659	19.1649
M6pr	-1.76563	6.87644e-17	M6pr	-4.23267	15.299
Mad2l1	-2.5468	7.11508e-12	Mad2l1	-3.85784	8.9569
Maged1	3.35841	1.52473e-19	Maged1	-3.69657	5.67525
Map1b	3.08494	2.01258e-23	Map1b	-2.24984	5.611
Map7d1	4.00002	7.72231e-17	Map7d1	-3.63551	7.79343
Mapt	3.67751	7.62348e-22	Mapt	-4.39882	10.1675
Marcksl1	1.85871	8.2157e-09	Marcksl1	-3.78397	14.1394
Mars	-2.75325	2.05096e-19	Mars	-3.73244	12.0325
Mastl	-3.4943	5.5892e-22	Mastl	-6.16286	14.3971
Mat2a	-2.6603	2.07319e-21	Mat2a	-2.20804	7.53594
Mcm3	-3.75491	2.60507e-16	Mcm3	-3.20856	10.9329
Mcm4	-3.5465	5.32198e-17	Mcm4	-2.78039	7.28111
Mcm5	-3.6646	1.26344e-19	Mcm5	-4.66264	6.7941
Mcm6	-3.4877	8.82704e-18	Mcm6	-2.15705	5.88372
Mcm7	-2.6847	6.02236e-17	Mcm7	-3.46153	7.72681
Me2	-1.7964	2.61086e-15	Me2	-5.23956	11.0474
Mecr	-1.7713	1.78471e-14	Mecr	-9.90965	7.05622
Melk	-2.9604	2.64864e-12	Melk	-3.94837	7.57589
Mettl1	-2.22425	7.20432e-11	Mettl1	-10.3557	6.23731
Mettl2	-1.75797	2.26328e-24	Mettl2	-4.73515	5.65606
Mkrn1	-1.76807	3.03498e-14	Mkrn1	-8.77532	8.88881
Mlh1	-2.40978	1.34743e-28	Mlh1	-5.64941	11.9517
Mms22l	-4.03258	4.26033e-25	Mms22l	-5.72304	6.05219
Mnd1	-3.48145	4.89187e-30	Mnd1	-6.23428	9.4786
Morc3	-2.24465	3.38833e-22	Morc3	-8.28107	10.6128
Mrpl13	-2.00856	1.73449e-19	Mrpl13	-5.30874	7.64714
Mrpl15	-1.75041	4.80969e-10	Mrpl15	-6.28228	5.89674
Mrpl24	-1.53541	1.1236e-09	Mrpl24	-5.57442	19.0246
Mrpl40	-1.6184	5.3386e-10	Mrpl40	-7.46683	7.93247
Mrpl47	-1.65904	5.22557e-13	Mrpl47	-5.96839	5.05904
Mrps22	-1.85992	7.88988e-12	Mrps22	-4.2955	6.87009
Mrps31	-1.64635	1.63562e-11	Mrps31	-7.66019	11.1759
Mrps9	-1.82859	1.24899e-42	Mrps9	-10.457	7.63381
Msh2	-2.93275	1.16344e-19	Msh2	-2.69144	12.0115
Msh6	-3.38232	7.57508e-16	Msh6	-2.95307	7.87616
Msi1	4.12156	3.36271e-19	Msi1	3.81906	6.91986
Mtf2	-3.1332	1.233e-38	Mtf2	-5.25459	5.35155
Mthfd1	-3.64091	2.42321e-20	Mthfd1	-3.44606	14.5193
Mthfd1l	-3.88257	2.39465e-41	Mthfd1l	-3.47445	14.3485
Mturn	4.46545	5.17577e-51	Mturn	4.20571	7.95413
Mxra7	2.96373	9.90827e-34	Mxra7	-5.39576	9.6657
Mybbp1a	-2.688	4.02229e-11	Mybbp1a	-2.53304	6.30904
Mycbp	-1.61828	1.62485e-08	Mycbp	-4.1031	8.7762
Myef2	-1.67686	5.19847e-08	Myef2	-4.83547	9.00003
Myh10	2.7999	2.60423e-17	Myh10	-3.20548	6.65496
Naa15	-1.85742	6.61789e-09	Naa15	-2.40735	10.0521
Naa25	-2.13813	1.24861e-22	Naa25	-3.73101	6.0413
Naa50	-1.73032	4.74595e-11	Naa50	-3.25214	8.57697
Nars	-2.67705	1.80438e-20	Nars	-3.12467	15.6936
Nasp	-3.15198	3.57668e-18	Nasp	-3.13387	10.8641
Nat10	-2.6806	2.8488e-23	Nat10	-2.55585	5.97041
Ncam1	1.57436	7.62548e-11	Ncam1	-1.76977	9.23768
Ncl	-2.56114	1.90271e-14	Ncl	-3.08715	13.7763
Ndufs1	-2.23292	2.35652e-09	Ndufs1	-3.25256	8.61888
Nfatc2ip	-2.8634	3.91315e-52	Nfatc2ip	-9.46206	9.67339
Nfu1	-2.2777	1.05272e-23	Nfu1	-1.45637	5.79029
Nisch	1.66932	1.40384e-09	Nisch	-3.22802	10.2361
Nit2	-1.80915	3.74968e-10	Nit2	-5.09709	6.90643
Nmd3	-2.60577	2.8246e-23	Nmd3	-3.98046	7.31056
Nop14	-2.82798	1.64465e-23	Nop14	-6.67894	8.59371
Nop2	-2.46224	4.96763e-18	Nop2	-7.83446	7.02767
Nop58	-3.37651	1.74172e-32	Nop58	-7.73511	5.15199
Nova1	3.21125	2.28849e-09	Nova1	-3.28915	5.44003
Npm1	-2.90069	1.96147e-20	Npm1	-3.64499	14.3301
Nsmce2	-2.68864	1.18563e-24	Nsmce2	-4.93149	8.09265
Nsun2	-2.53769	6.21061e-18	Nsun2	-3.29418	6.42575
Nsun5	-1.75643	2.50262e-08	Nsun5	-5.75745	7.29834
Nubpl	-2.08225	4.60007e-15	Nubpl	-8.17263	15.4513
Nudcd1	-1.73071	1.5386e-08	Nudcd1	-4.52278	8.02626
Nudcd2	-2.0701	2.32216e-11	Nudcd2	-4.05486	8.13476
Nudt10	3.61894	2.78388e-25	Nudt10	-3.1489	6.70049
Nudt16	2.42244	1.39471e-13	Nudt16	-5.71847	7.61868
Nudt5	-1.54254	3.10942e-15	Nudt5	-3.51324	14.5317
Nuf2	-2.33779	2.28402e-09	Nuf2	-6.90837	7.5838
Nup133	-1.79614	2.03086e-10	Nup133	-4.05235	5.05006
Nup155	-2.31339	5.23427e-12	Nup155	-2.87831	6.45025
Nup160	-2.93678	6.45955e-23	Nup160	-3.99254	5.40456
Nup54	-2.16107	1.53719e-18	Nup54	-2.92308	7.35411
Nup88	-1.55303	9.2943e-09	Nup88	-5.25254	7.78539
Odc1	-2.88182	3.79447e-26	Odc1	-4.88323	6.19006
Ogdh	-1.59895	9.18193e-08	Ogdh	-4.17009	11.1186
Ogfr	2.77029	4.24462e-18	Ogfr	-2.17808	5.1042
Ola1	-2.14318	2.55141e-23	Ola1	-3.29193	19.3629
Osgep	-1.82537	4.39402e-15	Osgep	-4.07186	10.3706
Pa2g4	-1.73464	3.27948e-08	Pa2g4	-3.32197	9.91012
Pabpc1	-1.58699	1.21052e-09	Pabpc1	-2.99844	12.026
Pacsin2	-1.8119	2.56567e-10	Pacsin2	-3.99636	8.30061
Paics	-2.74313	2.44755e-17	Paics	-3.40178	14.0118
Pak1ip1	-1.9006	7.90442e-12	Pak1ip1	-3.86049	7.3645
Palm	3.58991	6.99496e-14	Palm	-4.22625	6.65268
Palm3	-4.26122	6.37283e-37	Palm3	-7.24469	7.56625
Parva	4.15274	4.09078e-65	Parva	-3.8273	7.71154
Parvb	-2.26705	2.64184e-18	Parvb	-4.38988	5.45426
Pawr	-2.84286	1.00032e-31	Pawr	-5.50804	11.5062
Pbdc1	-2.728	6.17421e-17	Pbdc1	-4.94659	7.81118
Pcgf6	-2.28894	1.04626e-14	Pcgf6	-4.68892	6.128
Pck2	-2.05774	8.24239e-12	Pck2	-4.12356	8.62987
Pcna	-2.49534	1.6746e-14	Pcna	-2.18446	6.66349
Pcp4	6.26801	1.53915e-07	Pcp4	-1.5136	8.40549
Pdcd10	-2.1024	6.60879e-11	Pdcd10	-3.62709	11.3579
Pdcd2	-1.66521	3.77817e-10	Pdcd2	-4.35137	5.79624
Pdhb	-1.64905	6.19651e-10	Pdhb	-4.23405	12.2594
Pdlim1	-2.87749	3.92489e-23	Pdlim1	-5.74663	7.50136
Pdxk	2.31862	1.05615e-19	Pdxk	-6.65535	14.543
Pdxp	2.95962	3.9107e-21	Pdxp	-6.11007	7.59102
Pes1	-1.93012	2.24047e-09	Pes1	-3.39312	6.32761
Pex5	1.64222	1.08305e-09	Pex5	-0.715021	8.35065
Pfas	-2.0352	5.53979e-09	Pfas	-4.56437	8.36553
Pfdn1	-1.59183	5.71085e-11	Pfdn1	-4.1093	5.11077
Pfdn5	1.68989	1.19998e-07	Pfdn5	-2.79152	15.9517
Pgm2	1.74612	3.73832e-11	Pgm2	-3.88036	9.25151
Pgm3	-1.59766	1.84617e-07	Pgm3	-4.81401	10.366
Pgm5	5.59213	2.09828e-19	Pgm5	-4.5813	5.08321
Phb	-1.81145	5.87451e-09	Phb	-3.05122	8.05212
Phc1	-2.06124	1.86158e-15	Phc1	-7.02836	9.77896
Phyhipl	2.31923	2.43909e-09	Phyhipl	-3.27737	6.45401
Pipox	-2.85186	2.16063e-28	Pipox	-7.95988	12.7257
Pir	-3.75635	3.7355e-48	Pir	-6.21949	4.99607
Pitrm1	-2.79174	2.40651e-16	Pitrm1	-3.37052	7.38929
Plaur	-5.10746	8.09421e-40	Plaur	-3.37861	11.4723
Plekha7	-1.67272	4.96206e-08	Plekha7	-3.97538	6.0801
Pml	-2.76578	7.37424e-21	Pml	-5.07481	6.29366
Poglut1	-1.78801	4.19506e-30	Poglut1	-8.9745	5.56766
Pola1	-4.32205	2.78045e-28	Pola1	-3.64206	7.50842
Pole	-4.39318	8.24659e-34	Pole	-2.67265	9.67038
Pole2	-3.94803	6.63938e-41	Pole2	-5.95894	6.91472
Pou5f1	-5.48647	1.50486e-09	Pou5f1	-8.78487	5.09796
Ppa1	-1.94948	4.10472e-11	Ppa1	-3.74685	15.8174
Ppa2	-1.80502	2.31202e-16	Ppa2	-5.65437	12.2864
Ppcs	-1.57847	2.77787e-08	Ppcs	-5.98554	5.19341
Ppid	-2.50969	9.86292e-12	Ppid	-3.33404	15.6317
Ppih	-2.45959	2.83098e-22	Ppih	-3.5621	7.8284
Ppil1	-2.15618	2.28016e-13	Ppil1	-4.85127	6.81215
Ppm1e	4.59542	4.36451e-33	Ppm1e	-6.87419	6.24069
Ppme1	1.67865	4.30751e-15	Ppme1	-4.1824	7.83604
Ppp1r9b	3.92531	4.60244e-32	Ppp1r9b	3.15038	6.24168
Ppp4r1	-1.69731	4.02637e-17	Ppp4r1	-1.6131	5.61637
Ppp4r3a	-1.86804	7.76825e-13	Ppp4r3a	-4.2438	10.2241
Ppp6r2	3.02797	6.02909e-36	Ppp6r2	-1.6236	8.10778
Prdx1	-3.11046	1.59391e-25	Prdx1	-3.40188	10.4864
Prdx2	2.36693	3.60837e-12	Prdx2	-3.80842	12.0656
Prdx5	2.13055	9.84329e-09	Prdx5	-3.37848	7.39505
Prkaca	1.78305	2.49438e-14	Prkaca	-6.77337	8.18037
Prkacb	1.64582	7.56494e-13	Prkacb	-6.35733	5.50266
Prkar1a	1.83484	1.04477e-12	Prkar1a	-3.67311	5.49004
Prkra	1.87173	5.09037e-21	Prkra	-6.291	6.53756
Prmt3	-3.21533	9.50037e-39	Prmt3	-7.65039	6.09378
Prmt7	-1.57203	1.88794e-11	Prmt7	-5.9942	5.65214
Prodh	-3.01083	5.07175e-16	Prodh	-5.32366	5.70172
Prpf3	-1.65542	1.477e-09	Prpf3	-5.20167	11.017
Prps1	-1.59936	5.49104e-09	Prps1	-3.56413	10.0326
Prune2	-2.57766	2.47152e-23	Prune2	-3.34544	6.56977
Psap	1.94405	2.30129e-09	Psap	-2.56896	10.8086
Psat1	-1.94691	1.80756e-13	Psat1	-3.72218	12.0633
Psma4	-1.78628	1.32826e-08	Psma4	-3.8609	14.5213
Psmc3ip	-1.81218	8.31773e-08	Psmc3ip	-5.98955	9.31399
Psmd1	-1.66125	9.78825e-08	Psmd1	-3.54667	8.86927
Psmd12	-1.70582	1.10269e-08	Psmd12	-3.95536	13.0752
Psmd14	-2.36718	1.1847e-16	Psmd14	-3.63044	15.5942
Psme4	-1.79003	7.78581e-08	Psme4	-3.30577	7.92398
Psmg1	-2.3368	1.33901e-29	Psmg1	-4.31084	11.7402
Ptges3	-1.71586	5.39398e-11	Ptges3	-2.56751	8.05375
Ptms	3.09028	1.22138e-16	Ptms	-3.12699	7.53497
Ptpn9	2.31155	8.89999e-26	Ptpn9	-2.08483	6.08149
Pus7	-2.02764	1.05155e-15	Pus7	-6.21805	8.42704
Pxdn	3.03665	4.79152e-20	Pxdn	3.65575	5.41419
Pygb	3.64026	3.57566e-28	Pygb	-3.19385	10.24
Pym1	-2.07158	1.03679e-23	Pym1	-2.75476	6.36309
Rab11a	1.76961	2.25715e-14	Rab11a	-1.94174	6.61539
Rab5b	1.61905	1.37739e-22	Rab5b	-5.39437	6.70552
Rab6b	4.56074	2.2082e-58	Rab6b	-1.6716	9.36873
Rad50	-2.77573	1.8952e-13	Rad50	-4.81147	6.49409
Rad51ap1	-2.95866	3.77583e-30	Rad51ap1	-3.99963	5.74702
Ranbp1	-1.90612	1.95798e-10	Ranbp1	-3.78141	13.9594
Rars	-2.77568	6.45111e-27	Rars	-3.53083	11.7693
Rbbp5	-1.56277	6.39116e-18	Rbbp5	-2.65829	7.09813
Rbm26	-2.4932	3.97381e-08	Rbm26	-4.05214	5.55037
Rbm39	-1.59395	1.53663e-07	Rbm39	-2.89525	5.98391
Rbp1	4.81132	1.27199e-43	Rbp1	-4.65781	6.73047
Rbpj	-2.84186	4.19616e-23	Rbpj	-1.6963	5.79655
Rbpms	-3.28924	2.33434e-42	Rbpms	-5.57427	5.44146
Rbpms2	-3.26356	2.50703e-27	Rbpms2	-8.87737	20.4362
Rcc1	-2.1704	2.23622e-16	Rcc1	-9.75396	14.7177
Rcl1	-2.33382	4.09527e-19	Rcl1	-5.58166	12.1215
Rcn2	1.72484	2.20709e-14	Rcn2	-3.44372	8.36184
Rexo2	-2.25389	1.51343e-20	Rexo2	-9.40255	8.31205
Rfc5	-3.37223	4.15215e-25	Rfc5	-3.26466	5.23575
Rhob	4.08816	1.99977e-45	Rhob	-2.90237	6.86983
Riok1	-1.77056	3.31004e-10	Riok1	-5.38115	8.23861
Rnaseh2b	-2.93958	1.23029e-39	Rnaseh2b	-3.90942	8.44716
Rpa1	-2.59552	1.45145e-17	Rpa1	-4.31743	10.3225
Rpe	-1.8746	2.67298e-13	Rpe	-5.94705	5.73248
Rpl10l	-5.64672	6.74661e-16	Rpl10l	-3.33892	23.6871
Rpl7l1	-1.58915	3.10266e-12	Rpl7l1	-3.01398	9.59314
Rps6ka1	-1.83498	3.58082e-07	Rps6ka1	-3.17554	10.0503
Rrp1b	-2.98114	3.93627e-38	Rrp1b	2.84926	5.8953
Rsu1	-2.48488	5.50824e-30	Rsu1	-3.21907	7.24613
Rtn1	5.32095	2.94916e-60	Rtn1	-2.93094	5.94807
Ruvbl1	-2.14187	2.02785e-12	Ruvbl1	-3.92763	15.6531
Sae1	-1.5683	3.55709e-14	Sae1	-2.89548	22.2633
Samm50	-1.71921	1.73296e-11	Samm50	-4.12462	6.10405
Sarnp	-1.57144	3.70075e-14	Sarnp	-3.87754	6.28629
Scamp1	2.04626	3.1203e-24	Scamp1	-4.6361	5.69269
Scfd1	-1.79735	4.75519e-14	Scfd1	-3.88378	10.3794
Scg2	12.039	2.37835e-46	Scg2	3.01083	5.67026
Scpep1	-1.91364	2.72932e-13	Scpep1	-2.62907	5.12031
Sdad1	-2.05808	1.45728e-13	Sdad1	-4.5385	13.3809
Selenom	3.29389	2.33243e-07	Selenom	-6.6291	9.87233
Serbp1	-1.59562	1.36924e-11	Serbp1	-3.04536	13.1005
Serpinh1	4.5491	3.25431e-21	Serpinh1	-4.43995	5.94408
Set	-1.80876	9.82787e-14	Set	-3.66492	13.6907
Sf3b3	-1.665	5.62416e-08	Sf3b3	-4.53314	6.77386
Sgf29	-1.83428	4.36985e-15	Sgf29	-5.19073	7.80152
Sgip1	6.63612	2.17319e-46	Sgip1	-6.69616	19.1952
Sirt1	-2.82496	2.29948e-20	Sirt1	-5.80252	5.86312
Ska1	-2.94022	2.35847e-14	Ska1	-6.08666	9.77517
Slc16a1	-2.67585	4.0212e-19	Slc16a1	-7.27687	5.13086
Slc25a4	1.83627	4.51657e-10	Slc25a4	-3.13307	14.1868
Slc35f2	-5.275	2.07498e-40	Slc35f2	-6.70704	7.95871
Slc3a2	-1.89469	4.32498e-12	Slc3a2	-3.46644	8.02616
Slc44a1	-1.89873	5.88612e-25	Slc44a1	-6.11342	5.28152
Slc7a1	-3.05853	9.88748e-39	Slc7a1	-4.11867	11.1965
Slc7a5	-2.41475	1.0406e-13	Slc7a5	-3.77437	6.18865
Smarcad1	-2.73735	2.89342e-21	Smarcad1	-2.88955	5.17195
Smarcc2	3.10076	2.26369e-31	Smarcc2	-3.18087	5.32635
Smc2	-3.26407	4.7202e-11	Smc2	-2.55284	8.57006
Smyd5	-2.07978	1.37898e-13	Smyd5	-4.05743	5.5065
Snap25	5.76428	3.676e-20	Snap25	-3.73648	7.67409
Snca	6.10301	2.06426e-26	Snca	3.88929	9.58136
Sncb	8.67177	4.28835e-34	Sncb	-1.31876	8.69296
Sncg	3.71816	7.74228e-19	Sncg	-5.05432	5.40715
Snrpa1	-1.63651	6.82409e-09	Snrpa1	-3.72648	10.9912
Snrpn	4.46904	5.06169e-21	Snrpn	-4.20123	13.7693
Snx2	-1.53212	1.5969e-10	Snx2	-3.03857	14.1124
Snx5	-2.80041	4.8625e-34	Snx5	-3.32742	18.7299
Spc25	-1.98764	4.27665e-07	Spc25	-3.16696	8.6746
Spint1	-2.90581	1.05391e-14	Spint1	-4.71062	13.0215
Spint2	-2.01298	3.29823e-07	Spint2	-4.31737	5.81308
Spp1	-6.00101	1.55387e-20	Spp1	-1.52532	5.26458
Spry2	-1.76213	1.05398e-13	Spry2	-5.88987	11.3844
Spry4	-2.79595	7.2134e-37	Spry4	-7.6343	10.2424
Sptbn1	3.32894	6.01082e-27	Sptbn1	-2.7029	9.6981
Sptlc2	-1.56548	7.03979e-24	Sptlc2	-3.11132	5.98821
Srsf1	-2.33925	2.40756e-18	Srsf1	-3.32593	10.2084
Srsf10	-1.57177	2.3414e-08	Srsf10	-6.29752	4.99289
Srsf2	-1.72138	5.83109e-12	Srsf2	-4.74409	8.28731
Srsf3	-1.57012	1.26435e-14	Srsf3	-3.85306	7.41003
Srsf6	-1.6427	2.05896e-14	Srsf6	-3.02002	5.01201
Ssbp1	-1.94583	6.58841e-14	Ssbp1	-8.20418	6.30552
Stk3	-1.51444	2.75342e-10	Stk3	-4.30286	4.78304
Stk38	-2.29369	7.18372e-14	Stk38	-5.13987	5.22262
Stt3a	-1.84659	4.27891e-13	Stt3a	-3.13328	8.7478
Suclg2	-2.72921	2.69618e-32	Suclg2	-4.36914	11.716
Sugt1	-1.77208	2.05547e-15	Sugt1	-2.39693	14.4025
Supv3l1	-2.42682	6.0524e-53	Supv3l1	-4.90966	6.59342
Swap70	-1.56481	1.21336e-10	Swap70	-3.35078	6.60508
Taf4b	-4.03695	9.7708e-30	Taf4b	-4.45725	8.07498
Tagln3	4.17006	1.46177e-42	Tagln3	-3.74235	5.46679
Tars	-2.95185	1.76779e-19	Tars	-3.41988	12.9215
Tbrg4	-2.00347	7.29964e-14	Tbrg4	-4.05451	6.57466
Tcea3	-5.38538	3.16421e-42	Tcea3	-4.31187	6.25929
Tceal5	4.68959	4.71519e-11	Tceal5	-1.51521	8.60286
Tcf7l1	-2.52956	1.03254e-24	Tcf7l1	-4.50461	9.60544
Tcof1	-2.06118	2.41937e-07	Tcof1	-4.03291	5.96602
Tdh	-7.54245	1.41529e-39	Tdh	-2.84522	9.30165
Tet2	-1.93516	1.24276e-12	Tet2	-7.4366	8.02571
Tex10	-2.667	1.30277e-27	Tex10	-3.40036	6.71871
Tex19.1	-4.65755	5.06008e-16	Tex19.1	-5.40064	8.32634
Tex30	-1.90063	3.86629e-08	Tex30	-6.52031	10.3762
Tfam	-1.59141	7.68254e-13	Tfam	-3.10303	8.72498
Tgm1	-6.21199	1.47187e-59	Tgm1	-5.49146	5.88008
Thumpd3	-2.95501	8.975e-27	Thumpd3	-3.3778	12.1444
Tial1	-1.8964	1.49928e-10	Tial1	-3.06698	10.1923
Tigar	-1.89695	3.20378e-17	Tigar	-3.17808	7.37865
Timeless	-2.69129	5.93337e-12	Timeless	-4.90051	5.44034
Timm23	-2.58441	8.30646e-20	Timm23	-4.80819	10.5491
Timm8a1	-2.68837	2.0092e-08	Timm8a1	-3.98203	10.4529
Timm9	-1.58197	1.35391e-08	Timm9	-5.97291	7.66857
Tipin	-3.79904	4.88658e-47	Tipin	-5.13453	8.49464
Tjp2	-2.27491	6.36396e-14	Tjp2	-3.859	5.39675
Tk1	-2.44168	6.00769e-09	Tk1	-8.72173	13.7929
Tle4	-2.0216	7.59992e-16	Tle4	-3.37344	6.55373
Tm9sf2	-1.86173	1.69578e-09	Tm9sf2	-3.20598	7.11933
Tma16	-2.27955	3.51331e-41	Tma16	-6.28242	9.85392
Tmco1	-1.58754	1.95075e-11	Tmco1	-2.64154	8.12538
Tmem163	5.57926	4.63504e-51	Tmem163	-3.84993	6.92435
Tmem209	-3.01115	1.55638e-34	Tmem209	-4.27276	6.24866
Tmem35a	8.3034	8.32588e-39	Tmem35a	-6.59949	7.26
Tmem87a	-2.16745	4.1529e-13	Tmem87a	-9.12231	5.50014
Tmem97	-1.86608	3.5415e-11	Tmem97	-6.50279	12.272
Tmtc3	-1.94108	3.40407e-08	Tmtc3	-5.31899	9.30055
Tpbg	3.17134	2.03288e-18	Tpbg	-3.96092	5.09196
Tpi1	2.41132	3.50431e-11	Tpi1	-2.60177	8.84159
Tpm1	1.72676	4.63468e-13	Tpm1	-3.06527	8.31258
Tpm4	1.91407	1.44115e-11	Tpm4	-3.92664	10.2997
Tpp2	-1.62447	1.74892e-07	Tpp2	-4.08698	12.3122
Trap1	-2.97929	7.18382e-35	Trap1	-3.09797	8.11626
Trappc13	-1.66152	1.34742e-16	Trappc13	-4.23633	5.52956
Trim25	-4.91989	5.28255e-40	Trim25	-4.53239	9.05076
Triobp	3.89328	6.76146e-14	Triobp	-3.7801	9.2581
Trip12	-2.4167	5.72262e-15	Trip12	-4.12855	8.7673
Trip13	-3.42331	2.64651e-30	Trip13	-4.97796	10.9977
Trmt10c	-2.14106	1.45266e-18	Trmt10c	-5.50244	6.59799
Trnt1	-2.46234	7.76549e-21	Trnt1	-3.88096	5.60376
Trp53i11	2.64	4.36967e-10	Trp53i11	-4.06808	7.5951
Tsen15	-2.11158	1.60741e-15	Tsen15	-3.92087	4.68738
Tspan6	1.91116	1.0934e-10	Tspan6	-4.53623	12.3342
Ttc39b	-4.73503	2.09998e-44	Ttc39b	-5.92282	5.74257
Tuba1c	-1.68612	7.52034e-08	Tuba1c	-2.87204	12.6719
Tuba3a	-3.24126	2.16449e-07	Tuba3a	-2.66	16.0511
Tuba4a	-3.81549	8.99602e-19	Tuba4a	-3.01114	15.1487
Tubb2a	4.22631	1.09431e-21	Tubb2a	-3.0992	6.58987
Tubb2b	4.2949	2.19975e-36	Tubb2b	-2.6371	11.442
Tubb4a	7.52447	3.88288e-77	Tubb4a	-2.72192	10.0625
Tubb5	1.63036	3.8132e-08	Tubb5	-3.56042	11.863
Txlng	-3.32411	2.89304e-17	Txlng	-4.83154	18.9467
Tyms	-3.90737	4.74044e-72	Tyms	-3.5547	6.19714
U2af1	-1.76176	3.74182e-14	U2af1	-5.77089	5.73924
Uba2	-1.92263	2.50815e-12	Uba2	-2.72824	6.08926
Ubap2	-1.619	9.2385e-15	Ubap2	-3.01354	7.78876
Ube2o	1.76981	3.89874e-07	Ube2o	-2.58281	7.62318
Ube2t	-2.30873	1.75465e-12	Ube2t	-3.78951	6.16132
Ublcp1	-1.74242	1.63134e-12	Ublcp1	-4.17089	7.40445
Ubqln2	1.96007	3.17983e-11	Ubqln2	-3.8618	10.8118
Ubr5	-1.52787	1.61625e-09	Ubr5	-1.72081	8.96823
Uchl1	2.83857	3.23357e-18	Uchl1	-2.70943	8.80877
Uchl3	-2.35852	7.04058e-13	Uchl3	-3.17411	10.9974
Uchl5	-2.61687	2.62443e-18	Uchl5	-3.11352	11.5258
Umps	-3.01483	9.39537e-32	Umps	-3.00694	10.4702
Ung	-3.35402	1.65348e-14	Ung	-4.58145	8.83062
Uri1	-1.72297	2.03451e-12	Uri1	-8.33412	6.72513
Usp14	-1.97401	1.00689e-09	Usp14	-2.92266	12.9562
Usp15	-1.66694	1.78965e-09	Usp15	-6.41349	6.75379
Usp7	-2.0157	4.3207e-14	Usp7	-2.87231	8.81705
Utp4	-2.79169	1.47089e-25	Utp4	-5.20765	5.34532
Utp6	-2.348	8.99439e-16	Utp6	-1.96877	7.23356
Uxt	-2.61633	2.33409e-21	Uxt	-5.30779	14.2003
Vac14	-2.50369	5.0986e-23	Vac14	-5.52973	10.0231
Vamp2	3.19551	9.54389e-22	Vamp2	-1.98545	9.15674
Vhl	1.94892	4.13239e-20	Vhl	4.23898	6.09861
Vim	2.85259	2.42409e-12	Vim	-5.08745	11.3129
Vps26a	-1.69335	6.81315e-13	Vps26a	-2.76086	9.49215
Vps26b	2.09034	8.35999e-21	Vps26b	-3.8512	5.09151
Vps35	-1.7956	1.53557e-09	Vps35	-3.41792	14.3604
Vps4a	1.79238	7.42227e-12	Vps4a	-3.41304	10.1924
Wdr12	-2.54805	2.53694e-29	Wdr12	-3.5698	9.03434
Wdr5	-1.81901	1.10261e-14	Wdr5	-4.44118	7.25882
Wdr6	2.6167	7.59032e-13	Wdr6	-2.02945	7.13644
Wdr62	-2.28065	4.20059e-13	Wdr62	-2.80432	5.67314
Wnk2	6.38226	4.96508e-68	Wnk2	-6.13456	7.72564
Xpo1	-2.04055	8.55379e-09	Xpo1	-3.91433	10.7311
Xpot	-1.62554	3.49034e-14	Xpot	-3.20451	7.86424
Xrcc5	-3.36958	8.85662e-32	Xrcc5	-4.57055	10.0716
Xrcc6	-2.04371	6.3262e-13	Xrcc6	-6.02848	11.3639
Xrn2	-2.38593	1.07081e-13	Xrn2	-3.43613	8.66579
Yars2	-3.15129	7.00167e-23	Yars2	-5.52102	6.70355
Ybx3	-2.26247	7.19796e-36	Ybx3	-3.51196	13.1755
Zadh2	2.01279	2.54588e-12	Zadh2	-6.30079	5.25028
Znhit6	-1.54031	1.26239e-14	Znhit6	-9.43922	6.4467
Zscan10	-6.78908	4.89953e-69	Zscan10	-7.10231	6.48661
