# Supplementary material for: One-shot analysis of translated mammalian lncRNAs with AHARIBO
Source: eLife. 2021 Feb 17;10:e59303. doi: 10.7554/eLife.59303 (PMC7932693; doi:10.7554/eLife.59303)
Supplement: Figure 4—source data 3. [file elife-59303-fig4-data3.xlsx]

## Sheet: Processing
Accession full	Frame	Accession	Gene	Transcript	Confidence	Annotated Sequence	Peptide	Sequence	Translated sequence	RNA-seq	Proteomics	Pos peptide	First AUG pos	AUG in frame? (Yes if integer)
EMBOSS_045_2	2	EMBOSS_045	ENSMUSG00000050936	ENSMUST00000051089	High	[M].NSFVNDIFER.[I]	NSFVNDIFER	CCTTACGTTGCATCTTTAGACGCGGAGGAAAATGCCGGATCCAGCGAAGTCTGCTCCTGCCCCAAAGAAGGGCTCTAAGAAAGCTGTCACGAAAGTGCAGAAGAAAGATGGCAAGAAGCGCAAGCGCAGCCGCAAGGAGAGCTATTCTGTTTACGTGTACAAGGTCCTGAAGCAAGTGCACCCCGACACGGGCATCTCATCTAAGGCTATGGGAATCATGAATTCCTTCGTGAACGATATCTTCGAGCGCATCGCAGGAATGAAGACTCCCCACGACCACAGCACTCCTATCCCAAAAGGCATGTGGACACACGCTCCTCGTCACCAGCTGCATCAGACCCCTTCGGGATGCCTCGTTCTCAGCTCTGGAAACTTTGCACTAAGGATATACTGAGCTAC…	LTLHL*TRRKMPDPAKSAPAPKKGSKKAVTKVQKKDGKKRKRSRKESYSVYVYKVLKQVHPDTGISSKAMGIMNSFVNDIFERIAGMKTPHDHSTPIPKGMWTHAPRHQLHQTPSGCLVLSSGNFALRIY*ATCLPALWLG*PTLTSSDNAGTCAEAVCAGQRPCVLDTKEAEVAVSSCLLFGVYPPEPRVRRDFESSPRQQRQQLRAPKATTRSRYVGPRPR*SDWRAGVSSSAAAHSRRLPASRDAALAQMQSEPSLPRAESALEWGPSLYRRESDTHHPFPHAAADSVEIIHSCLLGESN*S*GLRETEKVRRGAFRVTGVSELWQR*PSRTLPALYTDDHEMAPASHFAPKSYFLFFYYVSR*GALIGVCFLCQLKNKRQGEKCCGAGSKGINLR…	61.0511	3.8797e+07	74	32	11
EMBOSS_131_2	2	EMBOSS_131	ENSMUSG00000097234	ENSMUST00000181328	High	[I].KIDNQINLPK.[K]	KIDNQINLPK	GCTGCAGAATATATAGGACTTCATAATTCACTCAGAAATCCCATCATTGATACTTTTCCTATGATATAACTATTGTTTTGAATATATCCTGCTTCAAATGAAAAATAGAGAATGTATCAATGTCAAGAAATTCAAAAGGTAAGTTAGCTAACATTTCAAAAATCCCAAGTCCTTACAGTCTACCTTACTCTACCCACACTACTAGAACATTCTGAACTACAACACAACTGCTTTTTAACAGATCCTATTTTTGCTCACAGACTAAGATACATTAAAACTGGGAGAAAGAATGTATGAACTCAAGGAACCATTTTACCCACACCTATACTGATAAGCCTCTTAACAGCTTCAACTAATTCTAGTCTTACTAAATATAGATCAGCTCCCCTGTCCCCAGAA…	LQNI*DFIIHSEIPSLILFL*YNYCFEYILLQMKNRECINVKKFKR*VS*HFKNPKSLQSTLLYPHY*NILNYNTTAF*QILFLLTD*DTLKLGERMYELKEPFYPHLY**AS*QLQLILVLLNIDQLPCPQNHPHLQHEPEGLPPT*PRRSV*HTQ*WTAECQQ**LPAQLSWGAYPLPPGPEPLYSLG*KEIKQTKRNFRKPVLQFLLTPALEYQVQ*SLISTLSFSFPILPYSRYYCLLKLKIQYL*ETRINLSNSLHLTCTQKKSPFYTIYSYRVMKALWVKQNPLNITHSTR*WWRTPLIPALGRQR*ADF*V*GQPGLQSKFQDSQGYTEKPCLEKPNQKEKENKAKNTRSFFSY*ANILSGTIPTKYSSKENLTLVFTLTISSLKR*KRKTI…	16.8746	6.73247e+06	895	61	20.6667
EMBOSS_153_1	1	EMBOSS_153	ENSMUSG00000097119	ENSMUST00000181149	High	[D].KINQLQNMVKDNK.[E]	KINQLQNMVKDNK	CCTCAGCACGCTTGGTCCCCAGGGAGCGCTGTTTGTTTGTTTGTTTGCTTGTTTGTTTGTCTGTTTGTTTAACGGAGCGCTGCGCTGGGCATCCCGGCGACCGACGAGGACTTCGCTGAGTCCTCGGGGAGATGCAAACGAGTCCGTTCTCTTTCTAGGAGCTCCAACTCGCAGCGCCAAGCGCCGAGGATGCCGGACGGACTCAAGATCCTAACTCTAACCTGAGGGACTGAGCGACTGCTCGCCCCAAAGTGTTCGCTCTCCTTCCTGGAAGAGCCACAAGGGGTTCGAGGCGACGCCCTAGGGACCCTTGGGAAGCGTCACGTCAGCCGCTTTCCCTCATCCCTCGCTGTTGGGTGTCTGTGGAACAAACTCGTTTTCAGGACTGTGATGACTATT…	PQHAWSPGSAVCLFVCLFVCLFV*RSAALGIPATDEDFAESSGRCKRVRSLSRSSNSQRQAPRMPDGLKILTLT*GTERLLAPKCSLSFLEEPQGVRGDALGTLGKRHVSRFPSSLAVGCLWNKLVFRTVMTILRCQLDYIWNHLQPRNGEEHTCERLSA*SG*IHF*SRPLR*EDTHF*SQSRGGKTQVFNPNLKRCLL*TYEPYFQLDVCIRT*KKEAFTLCLSALALLAHPFPHWYYNLLLDCSIY*RPPETCSLVGLSNH*IFRLFIVGLAGLQRKEREIDSISSVTLKNPD*YRFWYQKWF*RSRSIRMNLLSIWNRHFNSPAPSATEVSPVTPSPGSLESTEGPWYELYYKLKEINEFDYPGSPIVSDNGLGDPVYETFDSLGENKENDAAGW…	4.25302	1.56478e+06	418	132	44
EMBOSS_028_2	2	EMBOSS_028	ENSMUSG00000112964	ENSMUST00000099446	High	[R].NLMNVINVVKLLHFS.[I]	NLMNVINVVKLLHFS	GGAAGTTTGTTTTTGCTCTACAGGATTGAACCGTCTCTGTGTCTTGCTTTGAGCGCTGCTGTTGGGTGCTGTGAGTGGACCTCAAGTAAGCTCCGTTTTTGAAACATGGATGCAGTGACTTATGATGATGTGCGTGTGAACTTCACTGAGGAAGAGTGGGATTTGCTGGATCCTTCCCAGAAAAGTCTCTATGAAGAGGTGATGCTGGAGACCTACCAGAACATCACTGCTATAGGCTACAATTGGGAAGACCATCATATTGAAGAACATTGTCAAAGTTCTAGAAGACATGAAAGGAATGAAAGAAGTCGTATTGGAGAGAAACCCTATGAATGTTATCAATGTGGTAAAGCCTTTGCACGTCACAATCATCTCCAAATACATAAAAGAATACATACT…	EVCFCSTGLNRLCVLL*ALLLGAVSGPQVSSVFETWMQ*LMMMCV*TSLRKSGICWILPRKVSMKR*CWRPTRTSLL*ATIGKTIILKNIVKVLEDMKGMKEVVLERNPMNVINVVKPLHVTIISKYIKEYILERNLMNVINVVKPLHVTVVSKDIKEHILERNLMNVINVAKLLHVTVISKDTKKHIMQRNHMNVINVVKPFHNRIISNIIKERILERNLISVINVVKLLHFTIVSSIIKEHILERNLMNVINVVKLLHFSIVSKNIQEYILERNLINVINVVKRFHM*FVFNIIKEHILERNLMSVINAVKPLHFTIVSKNIKEHILERNRINVINVVKHFHNRVVSNIIKERILERNLMSVINAVKPLHVTIVSKNIKEHILERNCINVINVIKHL…	4.78988	2.65716e+07	248	106	35.6667
EMBOSS_075_2	2	EMBOSS_075	ENSMUSG00000097393	ENSMUST00000180524	High	[K].MSPSQLLELKRNQ.[T]	MSPSQLLELKRNQ	AGAGCGTCCGGGACAAGCGCTCTGTTTTGAATCTTTGGCATCTTCAGGGATGGATGGAATCCTACAACTGAGGGAGACTGCGGTCTTGGGCGTGAGCAAGTGAGGAAAAGCGTGCTGGAGCGACCAGCAGCAAACCTCCTCAGAGAGGGTTCCCGCGCGCGCTCCACACCTTTCCCAGTTGTGGTTTACACCCCACTGACTTCTCTCATCACATCCGTGTCTCCATCACCATCAGATACTTTTCTCAGTGCGTCTGAAAATGATGGGAAAGGCTCTCAAGCAGCCTAACGAGCACACTACCACCAGCACCCTTCACAAACTGAGCCCAGAACTTTCTTGAAGAAAGGATGCTGCTGGTCTCCCAGACCTTCCTGCTCAAAACCATAAGTTGGAAACACT…	ERPGQALCFESLASSGMDGILQLRETAVLGVSK*GKACWSDQQQTSSERVPARAPHLSQLWFTPH*LLSSHPCLHHHQILFSVRLKMMGKALKQPNEHTTTSTLHKLSPELS*RKDAAGLPDLPAQNHKLETLCNVLQNLMFWTSSSNIKQQ**YT*PWQ*PTVLELDLRHAHQEGKYAVY*KTNQLPRACEVKCLDEEPTSHHFTEPAQSDK*LIYLRLCWHTQMS*NFPECVRSSHLESSRVCLLHETCLSHLYLG*SLHMPDIGLPEPCPARPV**SWS*RMAVTKPCMVTVLIPKMHAQWKEWGTAGPTQSAQ*HLHMKPQGPSLARSSPESSSFLLQQMGTKTDNHSLTLCRNACPWLSARCQQNTFRIHSNAETMSRTPASAWNGMVSWRRQR…	0.724679	377714	1116	50	17
EMBOSS_212_2	2	EMBOSS_212	ENSMUSG00000097391	ENSMUST00000182499	High	[S].VCVALIINICHIMI.[-]	VCVALIINICHIMI	CAAACTCTGCTTTTTTGAAGGGCCCCCTGCACAAGCGATATGAGACTGCCTGCCTTGTGTGAGCCTTGGATGAGCCCTGCAGCTCCTTCGAGATGCTCCTTGGATATTCCTGATGGAGAAGACCAACCCCGAGGAAGCTTGGTCCTGCTTGCGATGAGCTTGCTGTGCTTTCACGGACACCCTTCGTTTCTTCTACCAGTTTTCAGTGCCAGGGTGCGCTTGAAAGGAGAGCTGATGCCAGGGCTATAGCCTTCCCCAGCCAGAGCATGTGGGCCAAACCCTTTCTGGATGGCTAGGCAGTGGGGAGAAGCCATGAGATGGTTGAGAAGTAGTCACAACTCCCCTGGGGACAGACTGGTTTTCAGGGTTACATCCATTCAAAAACACCCCCCGGAATTC…	FQG*CRWRTGSPAPAAWMTLPLVGTNPGWNQFKMDASFIQEPYQDWPEVCKSIFGPERSAISY*K*ILNGLSMSEGSPKPRKK*WTRNNRTCSKTCCMVDGPETAGLTDGHV*CLQIGNACALGFVYSGQPVVSAAIEGFLDSMAPSVRRPWLQ*LVQR*DSGSGGSPGIM*SSMNLLLIHMRMLVALVGLFCSGTFIVPSGP*CD*PYVHH*EMQVPIHIPQGLYTCRGLLTYSKWAPFSS*KPSSVNSRTKEDRERGQCQHRCKGVPNATSKDFLDMMATCRKMAVQSSW*RSQVWMFGHGQCA*ASCKSPGRVT*ASDPPVGLSSVGRANLGEAAVALPPSISLQDFEKRSSSGRDVGASTIQGV*LVDQRGVHSVHPVGHLVTNPQHQFHSKKTF…	1.05564	4.51655e+06	error	40	13.6667
EMBOSS_016_2	2	EMBOSS_016	ENSMUSG00000073155	ENSMUST00000130875	High	[K].KLEEIK.[K]	KLEEIK	GAGCTGGAGCTGGAGCACCTCTCACACCCTCCTCGCCCTCCCCACCGACATCATGCTCCAGTTCCTGTCCTTCAAGTTCCGAAAACTTTGGGGTGTCAGTGATATGACTGCGTTTTCAAAAAACCACTTACTGTGAGCTCTTGGCGAAATCTTCGCGCTTGGATTTACTTTGGGCAACGTGGTTGGAATGTATCTGGCTCAGAACTATGAAATGCCAAACCTGGCTAAAAAACTTGAAGAGATTAAGAAGGACCTGGAAGCCAAGAAGAAGCCCCCTAGTTCCTGATGCCTGCCTGGCACTGCAATCTGGACCCACCAGTTCCATCCTGGGGGGCCTGTCTCCTTCACAGCCACGTCCAAAGCTGTGTTCCTCTTTGGTCTCAGACCCTGCGCGTTGCT…	SWSWSTSHTLLALPTDIMLQFLSFKFRKLWGVSDMTAFSKNHLL*ALGEIFALGFTLGNVVGMYLAQNYEMPNLAKKLEEIKKDLEAKKKPPSS*CLPGTAIWTHQFHPGGPVSFTATSKAVFLFGLRPCALLRLQHGPEVELAFRFQHLPVPVSSVHLLLRPKPGTMVLG*QPQP*QDSLACALGFLPPTVKK*MDLDSCWGLTV*Q**QELARQTKLC*SH*SQYLQA	7.60156	4.01705e+07	77	53	18
EMBOSS_056_1	1	EMBOSS_056	ENSMUSG00000089726	ENSMUST00000134140	High	[R].NGGGLLMSYVIK.[L]	NGGGLLMSYVIK	CCTAGTCATACACGTGGACCTAGCAGCACCCGAAGCATTGCCCAAGGATACTTGCTGAGAAGGAAGTTTGCCTGAGTGGTATCTGACAATGTGGAGGACAGAAGAAAGGGATTGCTGCCTGGTCAATGTGAGGCTTTCCTCTAAAGGTAGTACCAAGTCAGACTGCCTTCCTGATAACAGGTCTCATTTTGTAGGACCCTTATTGTGTGTTTTTTGGGGAAGCCTACTGTAAAAGCCAACATTTTAATGGGATTGTATCTTATATTTCTTTAAGGAGTTTTTTTTTTTTTTTTAAGGCTTACATGTGTCCAATTTGGAACTTCTGGCTATTGGCTCCTCCCCTCCCCCCCTTGGGTATAAGCTGTAATTGATGTTTGTGACAGAATTTAGAGCTTTGGC…	PSHTRGPSSTRSIAQGYLLRRKFA*VVSDNVEDRRKGLLPGQCEAFL*R*YQVRLPS**QVSFCRTLIVCFLGKPTVKANILMGLYLIFL*GVFFFFLRLTCVQFGTSGYWLLPSPPWV*AVIDVCDRI*SFGFFLFV*LFISNLAGIK*TSPWD*SCDQSE*CQSAYSAGSDVCIYCSEGTCSIMLTAASVGATVGAASGGTGCVQSSVSRSRGGPAGAACFLF*GASSADSEVD*HLLP*VLLLA*EVMSSSNPSQASM*GSLHSCVCSPLLVLHSCTTRRM*LCKSMQN*WWPAIYFKCCFFLN*FCIFIVSM*SLRGVCDVTASVALKCL*CR*CVAIYCITST*STASCRTPASPGHRPANCPVIEHWSMVSFAGLHPAV*YSAVQIHAKLTVV…	4.07231	4.68619e+06	error	89	29.6667
EMBOSS_089_2	2	EMBOSS_089	ENSMUSG00000097039	ENSMUST00000180432	High	[K].ELAEQPSSALKTSNREQ.[V]	ELAEQPSSALKTSNREQ	GAGCACATGGACCCACTGGTCAAGCGGGCTCGGCAAGGCCAGGATGAAGAGAAGCTACGAACTTAGCATTCCCAGAGCCCCCCGAGTGGATATCCGCGTGGAAAGGATGTTGGCAGCCCCGGTGACCTCGGAGTCACGGCTGGATCCACCCTCTTGTCTGATTTTCTTAACTCTACTACGGTAAGAAGATGCCCTCCATCAGCAGGCCGTGTCTGCTGGGACCTCTCTGGAGACTTCCTGAACCCTGTGGATTTACAGTAAGATGCAGTTTCCTGGGGAGTAATTCTGGTGGATACAAATTCCGGAGTATTACACCTGGCTTGCCTGGAGATGTTACAAGTAGCTGGATGGATTCTTCAGCCTGGATGCCCACTGAAAACAAGGACCGAAACTAAGAGG…	STWTHWSSGLGKARMKRSYELSIPRAPRVDIRVERMLAAPVTSESRLDPPSCLIFLTLLR*EDALHQQAVSAGTSLETS*TLWIYSKMQFPGE*FWWIQIPEYYTWLAWRCYK*LDGFFSLDAH*KQGPKLRGLYLYP*LNENVCCHLSGYLELPLK*SRVLSPQTLAVALACPWQAVYPEVEEVALEFWLVTSTGAGTLPD*GGH*EFKCTSWSLMQK*SPQHAQEELPWRMRGMGI*VYPLSVPEGF*DPFLNQRWNIWGFGKLRCEALT*EMPSNSADVTQTINSKDGSLHAGGNPIRQLSSAELVGDRLAQVIDPAMILTLRE*DALQKTEDS*NWERCLEILIRVKKELAEQPSSAL*KTSNREQVPTSLPA*LLFIS*LWSVMSSAMVLTSSG…	2.01096	2.96388e+07	error	7	2.66667
EMBOSS_200_2	2	EMBOSS_200	ENSMUSG00000097566	ENSMUST00000181251	High	[R].QLTDNQRVNQKA.[M]	QLTDNQRVNQKA	GGACCCGGGGGCGCGCGGGCCCTTGCTAGGACGCAGAGGCCGAGCGCACCTCAGCGCCCATCCGGAGCTGCCCGCTGCCGGGCAGCTCTCGGGGTCGTCGCTGCCGGAGTCACTTGGGGATGGACAGCTGATCGGCTGGTCCGACTCCCCTCCCTCCACCGCGCAGCAGCCCCGCCCGGCCCCCTACCTGGCACAGCAGGGCAGAGACCACGGCAAGGGCTAGCGCGCTCCGACGGCCCATGGTACCGCTGGACGCCCTTGCTCTCCTAGAGTATCCTCTTTTCTTTCTTCTTCAAAGACCCAGGGATGCCAGGAAAGTCTATATGACCCGAGGAGTACTGGCGGAAAGGCGTCTCTCGGCTCCAGCTTCTTCGCGGAGGGAAAGAGGAGAAAGGAGAT…	DPGARGPLLGRRGRAHLSAHPELPAAGQLSGSSLPESLGDGQLIGWSDSPPSTAQQPRPAPYLAQQGRDHGKG*RAPTAHGTAGRPCSPRVSSFLSSSKTQGCQESLYDPRSTGGKASLGSSFFAEGKRRKEIRHRGKRAQMFSLIPKRACSGFLRRPIRKRRSGNPTGEAIIRGPEGRGGNGGGKDCGARPGFPARRHSAAAAAPRVF*TGISCTIAKPRVFLKNSANAMREHTPRTGGRSVGGSVPHRCSPVTCPGQTG*PRVHAGGSGPGWRLPPLNPAGRSHN**DANEQPPNLARAVTKEPLFQTLLSMDRQMVSEL*NVQPSSPPPTSPPPSPLCLRPRPFASLPQRKTRSFTFLQNVPGDEPLCSRSWS*GRVAHRPTATGPKTLGTLGGLS…	1.35522	318588	790	120	40.3333
EMBOSS_094_2	2	EMBOSS_094	ENSMUSG00000093908	ENSMUST00000179344	High	[G].KELQLK.[L]	KELQLK	GACAGTGGCTTGGTGGCGCGCAGTTCCCCTTGACTGTGCGCGCCCCCGTCTGGGCTCCTTTGCAGAGGAATCGGTAGCTGCAGCTCCCGGAGCACAGCGGACAGAGCTGCGGGCTGCGTGCGCCCCTGCTGCCACCGGGCCTGCCGCGGTGGCTCCCGCGCCCCGCGGCGACTTCCGCTCCCGTGCTTCTCTTTGTTCAAGTCCCCGAGCGGCGGCCGGGTCGGAGCCCGCGCCTTGGGCGACTGAGGCGGCCGCAGTCCGCGCCCCGGCGCCCTGGCGATGCCGGACCAGATCTCCGTGTCGGAATTCGTGGCCGAGACCCTTGAGGACTACAAGGCACCCACTGCCTCTAGCTTCACCACCGGCACGGCCCAGTGCCGGAACACCGCGGCGGCCATC…	TVAWWRAVPLDCARPRLGSFAEESVAAAPGAQRTELRAACAPAATGPAAVAPAPRGDFRSRASLCSSPRAAAGSEPAPWATEAAAVRAPAPWRCRTRSPCRNSWPRPLRTTRHPLPLASPPARPSAGTPRRPSRR*AVA*PAPGGRLGSRGSRCALGTR*ASAPGGRYPVLSSCAHTREKFLVPQSRTQPDQQCPTQKPFVPCSRERLLGHLGPFLGTLLSVPISLAGFQVLCSHPQRGQLRL*SLWWLRAGDPCELCFPE*WLSLRGPLQLVPDVARRGQLWLLSHHVEQIQGPQAA*ARVPIPSWEAWQFPLLATEQSCRGMWRMVSLRSKRSLVAASGLPVWCLLTV*SAPVPLTWKGPA*SLY*VAKQKALQILGKRDCEKEAVWVEN*SRLGRG…	4.37189	4.01705e+07	error	280	93.6667
EMBOSS_214_2	2	EMBOSS_214	ENSMUSG00000097142	ENSMUST00000181443	High	[R].KGPNDISLAQSYLPI.[I]	KGPNDISLAQSYLPI	CAAGCATGGAACCTGGGACCTGTTTTGTTTTGTTTTTTTACAACCACAGAGACTGTCAACACTTTTTAAAAAAATTACTTATTAAACCTAATGTCATTCCATTATTTATGAGCATCAAATGGTAATTTGATCAACATATGCAAATGATTGCCTCTCTGAGATAGATTAATGCAGCCGTGAATATCTGAGTAGTTTATAATATTCTTCTGGGTCATTTCAAAGATACTGATGAGAGAGGCTCCACTGTTTGGTACAGTCATCAAATTCACAGGTGCTGACCGAGATTTCAGAACATTTTATAAGCCCTAAGGGTTTCTTCTACAACCCAAAGTGCATGGAGAGGAAAGGACCCAACGACATCAGCCTGGCTCAGTCATACTTACCTATCATATAATGAGA…	KHGTWDLFCFVFLQPQRLSTLFKKITY*T*CHSIIYEHQMVI*STYANDCLSEID*CSREYLSSL*YSSGSFQRY**ERLHCLVQSSNSQVLTEISEHFISPKGFFYNPKCMERKGPNDISLAQSYLPII**DDCSDLTWAEKH*VFMHCP*QQRAQSLPGRGPCTVPYTNGPIFNRPASMVEGTEMSVC**DKLNNFPSFNS*TMQTKLQQFPMASSVMQT*QGS*NFRFVISQCILSCPKDGFYSYISFLSNLALFRGMGEV*DSHLASD*QS*VISGLKQRF*AIT*STA*KQAQSWSKHSFLDPCCPFFKITHFVHEANSSLKEKKISQLK*RHHWIKNMDSLNTGS*HMITIQLTSQQKSMEQTQPCSCDCFPDPSSQARI*EAHQNALLLYIH…	2.4356	1.55691e+06	115	6	2.33333
EMBOSS_042_3	3	EMBOSS_042	ENSMUSG00000056771	ENSMUST00000071101	High	[S].KNNPPPQNAKPK.[R]	KNNPPPQNAKPK	GTGCCAGCGCTCCTCTCCCAGCGCTCACCGGTCCTTCCAGCAGTCCTCAGGTTGCACGCGACCGGCAGTGAGCTTCCACTGGGTAGGGGTGGGAAGCCGGTGGCTCCGGGCAGCGGTGATAACCCAGCAAGGAAGCAGAGTCGCATTTCGGAGCGTCCACTCGTAACGCGGCCTCTCGCACACGGAGCTCGTAGTCCAGGGGAGAGGAGGCCAGGGCGGCCCTGGAGAGGTTGTAGGTGCAGCGGATCGGCCGTAGAGACCCCGTCGGACTCAGGAAGGCACTGTCAGCCGCTCGGAGCGGAACCCCTTTCCCAGACAGTAGAGTCACCCCTCCCCCTCCGGGGACCGTTACTGGTCGCCTCCTGAAGGATCAATCTGGGATTGTCCGCTAAAGTGGCC…	ASAPLPALTGPSSSPQVARDRQ*ASTG*GWEAGGSGQR**PSKEAESHFGASTRNAASRTRSS*SRGEEARAALERL*VQRIGRRDPVGLRKALSAARSGTPFPDSRVTPPPPGTVTGRLLKDQSGIVR*SGLRHR*SRARWLVASEALCPGAFANQPSTTEKQVQ*WNALKAGYNVSYLRLGS*SRRTAESLRPAWATSETVSKNNPPPQNAKPKRERKRITRCPGVSGSWITLVFSTLTVSTN*FLRITMWRCDLQMPQKWLLSGIRVEVLHDFFHGCTCFSS*GFGLAYLLEVLNSTPMLSLYCLFSLGLVPHLMSLSSPDTNARVLTLEFICRRSFP*PECCQGFFRKSLPNVRGPEI*HESLVK*SQ*RESLSQVVTMIFLPLPIPTILGKGS*…	0.868286	2.86743e+06	205	503	168.333
EMBOSS_124_1	1	EMBOSS_124	ENSMUSG00000097526	ENSMUST00000180407	High	[K].IELRENLQTY.[F]	IELRENLQTY	AACTGGATGAGAAAAATGTCAGGGACGCAAGACACCCACCTGGGTTCTAGTGACAGCATCAAAGACAAAGAAATGACACTCCAGGAAAGAAGCTTAACTAATGGCTCTTGTCCTAGCTGACACCCCTAGAGGTTGTGTCCTTCTTAGGCAAGAGGATCGAACCAGGCCTATGAAGACCCCAAAGCCTGAGAATCCTGGCTCCTGACGACCTCCAGGCCACTGTGTCTTCGGGTCTGGACTGCAGAAGGGTTCTGTTCTACTCTCGGAACTCGAAGATCCTGGCCTCACCGTCCCTTCCCTAGCCCGAGCTCGGGGTGTGCAGAGACCCGCGAAAACCCGGCAGGTCTCCGGCGCGCTCGCCCGGGAGCAGGATCAGAACGCGCGTGCGCGCCGGGAGCC…	NWMRKMSGTQDTHLGSSDSIKDKEMTLQERSLTNGSCPS*HP*RLCPS*ARGSNQAYEDPKA*ESWLLTTSRPLCLRVWTAEGFCSTLGTRRSWPHRPFPSPSSGCAETRENPAGLRRARPGAGSERACAPGAPPPPFNRAAGK*PLTAPLLAAPPSHHLRDARCRSWVLRTHSPALRESSEASQSLRP*GAGSQPFPPLG*ERPVCACAGGGGAGRGGAGRAEPLDSRREREDWIKKGNPKGLFYVSRASALK*KTKTLWVFY*IIIRIKIELRENLQTYFPFQSSGLFQSLKWLVRKDVFYLGGSGEFDVWGGVLGCLSSYRHMF*SWQGIYRKLRIERSEINIPCSFRVTCAPVETMLFYEQIQDRAPKEKKKIISELSV*IEEIDIWVMRES*QK…	0.855458	16113750	272	7	2.33333
EMBOSS_065_2	2	EMBOSS_065	ENSMUSG00000097636	ENSMUST00000180489	High	[R].EISASANLELNGAPSQQ.[L]	EISASANLELNGAPSQQ	GACTTTCTCATGCTCTCTTCCCACAAGCCAACAGTTCCAAAGCCGTGAGATTTCTGCTTCTGCCAACCTAGAGCTGAACGGTGCACCATCTCAGTGACAGCTTCCTTGCAGGCTGACCTACTTTGACCAATGACTTTCAGGATTGTCCTCCTCCAAGCCAACTGCCACATGTGAACGCTAGCCTGCTGGAAAGGGCACACGGAGAATAGTGGTGTCATGAGTGATAGCCCCAACCAGTGACCAGTTGAGTGATGGAAGCCACCTTCCACAGGCAAGCCAATGAACCAAAAATTTGATTCTGCTCCTAGAATTGCCAGGAACACGTCACCTCCTTAGCAGGTGCTCGGAACATATTTGGAAGATGAGTCCCCTCGTATCAGTGCACATTCCTCAGCAAAA…	TFSCSLPTSQQFQSREISASANLELNGAPSQ*QLPCRLTYFDQ*LSGLSSSKPTATCER*PAGKGTRRIVVS*VIAPTSDQLSDGSHLPQASQ*TKNLILLLELPGTRHLLSRCSEHIWKMSPLVSVHIPQQKVTGCKTSKKKKKQENGVCASESHPLCQARRRKPSHLNLLTTGWELHNLGTVPHACALALSELRKEDQKVQGHSRPYLRFAASLGDPDLG**RTVDMNCRIAVRNS*HPELCTENAVVRELSGREEHGTKVGMGEALCAHRTCPFMGCGSGSATV*LLS*CVYAKGQGPCIRSGWAGLVWCAVFPVGMAVIHYPSQPAQLLSGFNL**TSQKMPSG*ERDGGGGGGGELPR*PSVSCQPQIFLETTHWIHRAQNLSHQWQKTLLHPI…	1.47363	3.48324e+06	error	10	3.66667
EMBOSS_299_1	1	EMBOSS_299	ENSMUSG00000108621	ENSMUST00000188038	High	[RV].LALEELR.[SI]	LALEELR	CGGACACGGGTACGAGTGGGCCCCGCTTTCGGCGCTGGTACCAGGAGCTCTGAGAGGAACGTGGGCGAGCTCGGAAGCTGCGCCATGGATCTCGGGTTTCCCAAGTTGGCCTCAAACTTTCTCTTAGCTGAGGAGGACCTTGAACTTCTGATCCCGCTACCCAAACCCACCTCCAGAGTGCTGGGATTAAGGGAGTTTTTGGCCTTTGAGGATGTGGCTGTGGAGTTCAGCCAGGAAGAATGGGTTTTGCTGGATCCTTCTCAGAAGAAACTATACAGAGATGTGATGCTGGAAACCTGCAATAACCTTTCTTCAATAGGCATCAAATGGGAAGACAAGAACATTGACGAGCAGTACAAACACTCTTGGAGATTCCTAAGGGGACAAACCATCTGAACA…	VLCVGSPWRTRVRVGPAFGAGTRSSERNVGELGSCAMDLGFPKLASNFLLAEEDLELLIPLPKPTSRVLGLREFLAFEDVAVEFSQEEWVLLDPSQKKLYRDVMLETCNNLSSIGIKWEDKNIDEQYKHSWRFLRSCMIDAIYEHREGGQFQETFTWIPDFHRSTDISTEVKPFECGVCGKVFTCHSSFNEHIMSHLGDKPSEHKHGSCGIQQQSQSVEKSYKQCGMAFACHCSLSIDGRTNSKDKCYKCEQSSKALSSSSSLQSHKTVYGAGRTYECEECGKSFRHESSFLLHQLTHIGRKSYECKQCGKAFRCHSYLQLHENFHIEENPYECKQCGKTLCSPSSLRVHERIHNGEKLYACKRCDKTFKCQSYLRIHERTHTGERCYDCEQCGKAFRS…	3.54781	1.26229e+06	error	85	28.3333
EMBOSS_099_2	2	EMBOSS_099	ENSMUSG00000073164	ENSMUST00000149246	High	[AK].LLLPGVIK.[DS]	LLLPGVIK	GCGCGCCCGCGTGTGGGCTCCTTTGCAGAGGACTCGGTAGCTGCAGCTCCCGGAGCACAGCGGACAGAGCTGCGGGCTGCGTGCGCCCCTGCTGCCACCGGGCCTGCCGCGGTGGCTCCCGCGCCCCGCGGCGACTTCCGCTCCCGCGCTTCTCTTTGTTCAAGTCCCCGAGCGGCGGCGGGGTCGGAGCCCGCGCCTTGGGCGACTGAGGCGGCCGCAGTCCGCGCCCCGGCGCCCTGGCGATGCCGGACCAGATCTCTGTGTCGGAATTCGTGGCCGAGACCCTTGAGGACTACAAGGCGCCCACTGCCTCTAGCTTCACGCGCACGGCCCAGTGCCGGAACACCGCGGCGGCCATCGAGGAGGCTACACTTGGGAAAACCATCATATTGAAAGACA…	PAGPSPFRGRRPGQWLGGAQFPLTVRARVWAPLQRTR*LQLPEHSGQSCGLRAPLLPPGLPRWLPRPAATSAPALLFVQVPERRRGRSPRLGRLRRPQSAPRRPGDAGPDLCVGIRGRDP*GLQGAHCL*LHAHGPVPEHRGGHRGGCSDL**CARELHSGRVEFAASFPEESLQRCDAGDLLEPHCYRLHLGKPSY*KTLSKFKKK*KV*SPLPAAIGKQNSKLGPEVLQDLRKHREFTDHELQEW*KDSLNDCPTGYLTVDNFKI*ANFFPYRDTSKITEHVFHTFVTNSDVSIDFRVFIIALSLTSRGKLEQKVKWAFSMSDLDSNGYISFSEMLELVQVPALDRAWHMGSAGIQDPHPQPHTPGHSSALLLPGVLKDCMSLHRITIKAKHLSIAC…	8.10613	3.30311e+06	error	243	81.3333
EMBOSS_126_2	2	EMBOSS_126	ENSMUSG00000097026	ENSMUST00000180410	Medium	[K].HLFGILQIR.[P]	HLFGILQIR	AAGGTATGAAAGAATGGCTTTAATTTAAAATTTTTTTCTTCTAGTGGCAGTTTTCTCTATACACAGTGTCCAAACACATAATTACATTCTCAGACTTTCAGAATCCTCTGACACTGGGTTGGAAGCAGATGTTCGGCCGTGCCTCCTCCCCATCCCATTGTTTAGCTTTCCTGCAGTTTATTCCGGGCGTGAACTCGGTGGTGTTTAGTAAGGGCGGAGCTCCGGCTGAAGTTTCTCCCACACTCCTTGCAAGCATAGGGTTTCTCTCCAGTGTGAGTTCTCTGATGGTCGTGCAAATTGGTCTTCTTTCTAAAGGCCCGCCCACACTCATTACACTCATAGGGTTTCTCTCCGGTATGCGTCCTTTCGTGCTGAATCAGGGATGAGCTTTGACTGAAG…	RYERMALI*NFFLLVAVFSIHSVQTHNYILRLSESSDTGLEADVRPCLLPIPLFSFPAVYSGRELGGV**GRSSG*SFSHTPCKHRVSLQCEFSDGRANWSSF*RPAHTHYTHRVSLRYASFRAESGMSFD*RLSRSQCTHRVSRQCGSSRVA*VTRVD*RLPHTHYIHRVSLQCEFDDAL*NLYSF*KLSHIRCTDRVSLGDETGTADQEGSVQSRRNSPQRGASGAQRSL*CDRSLSHSHYNGTTLLQ*AGLHLEEEEC*AQKPG*SCYFGKVCFFYESSYVYKGMGSDQMPSHKCCTRKASLLYGSSHAGQGKNTC*RPSHIPYTGRVSPHCGSPHVA*GTCCA*MTSHRDCSDRASLPCGFSGVEQEMNCAGRLSHRGYTDRASLLYVRFHADQG…	1.14267	9.312e+06	error	6	2.33333
EMBOSS_312_3	3	EMBOSS_312	ENSMUSG00000114188	ENSMUST00000222330	Medium	[K].QVQNRGGSKTPR.[A]	QVQNRGGSKTPR	TCTCTGTGTCGGAATTCGTGGCCGAGACCCTTGAGGACTACAAGGCGCCCACGGCCTCTAGCTTCACCACACGCGCACGGCCCAGTGCCGCAACACCGTGGCGGCCGTCGAGGAGGACCAGAGGGAACCTCTTTGGGTGCGAGAGAGATTGGTGAAATGCTGCAAGAATGAGGCTCCTTGCCGGGCGTGGTGGCGCACGCCTTTAATCCCAGCACTCGGGAGGCAGAGGCAGGCGGATTTCTGAGTTCGAGGCCAGCCTGGTCTACAAAGGATAAGCTCGGGATACTTGGTGCTCGAAACCCGGGGAGAAAACGCCTTAACAACGCGCACACCAGAGGAGACCCTTCTAATCGAAGCAGGTTCAGAACCGAGGTGGATCTAAAACTCCGAGAGCATACT…	SVSEFVAETLEDYKAPTASSFTTRARPSAATPWRPSRRTRGNLFGCERDW*NAARMRLLAGRGGARL*SQHSGGRGRRISEFEASLVYKG*ARDTWCSKPGEKTP*QRAHQRRPF*SKQVQNRGGSKTPRAYWILEEDNPFWLPERLTRRILTPEDDSRMDPLETTSSPRATSVDLGS*YIWRV*MGNSVCFP*AHACPSX	0.811712	6.1082e+06	119	157	53
EMBOSS_007_3	3	EMBOSS_007	ENSMUSG00000078308	ENSMUST00000089534	Medium	[D].GTSQRSDSEGAFAELCQVHQGAERIDLK.[L]	GTSQRSDSEGAFAELCQVHQGAERIDLK	AAATAATTGTATATCCATGTCTACACCCAAGACATGGAACTAGCCTAGAGTCCATCAATAGAGGAACAAATAAAGAAAATTGGGTGCATATACGCAATGGAATTTAAGGCTGCTCTGGAGAACAAAGCTATCACTGGTGAACTCAGGATGCATTGACTGCAGTGCAGAAGAGAACTCAGGATGCATTGACTGCAGTGCAGAAGAGAACTCAGGATGCATTGACTGCAGTGCAGAAGAGAACTCAGGATGCATTGTCTGCAGTGCAGGAGAGAACTCAGGATGCATTGACTGCAGTGCAGAAGAGAACTCAGGATGCATTGTCTGCAGTGCAGGAGAGAACTCAGGATGCATTGTCTGCAGTGCAGAAGAGAACTCAGGATGCATTGTCTGCAGTGCAGG…	IIVYPCLHPRHGTSLESINRGTNKENWVHIRNGI*GCSGEQSYHW*TQDALTAVQKRTQDALTAVQKRTQDALTAVQKRTQDALSAVQERTQDALTAVQKRTQDALSAVQERTQDALSAVQKRTQDALSAVQERTQNALSAVQKRTQDALSAVQERTQDALSAVQERTQDALSAVQERTQDALTAVQERTQDALSAVQERTQDALSAVQERTQDALSAVQERTQDALSAVQERTQDALSAVQERTQDALSAVQERTQDALSAVQERTQDALTAVQERTQDALSAVQERTQDALTAVQERTQDALSAVQKRTQDALTAVQERTQDALSAVQERRHFFFGEVCSNFIDGIQESREGSLGPSCYYGAVGWKL*GRCSVLRTELG*GLLSNRGPLTCSQCPCW…	1.16787	226585	error	17	6.33333
EMBOSS_206_1	1	EMBOSS_206	ENSMUSG00000097125	ENSMUST00000181920	Medium	[H].LLQQDHFHGHSGAIGLQSEGEGR.[A]	LLQQDHFHGHSGAIGLQSEGEGR	GTCGCGGTGGAGAACCCCGCAGTTGTGGCAATGCCGCACGGCCTCCAGCACCTGCCAGAAGAATCCTCGGGCCAGGTCCTCCTGTAGGGCTCCTCGTTCGGTGATAAAGTCGAAGAGGTCTTGCACCGGTTCGGGCCTCTCCAGGATCAGCACGAAACTATCGGGCCTCTCGAACCAGTCCAGAAGTCTAATGACGCCCGAGAAGTCCGAGCTCACCTTCTTCAACAGGACCACTTCCATGGGCACTCGGGTGCCATTGGGCTGCAGAGTGAGGGCGAGGGTTAGCGCGCCGGTTCCGGCACGCCCGTCGCCACCCACCCACCCATGAGAGGGTCTCTGGCTCCGGCTCACTCACCAGTTCTCCCCAATCGGAAATCCGGTCCTTCTCCACGTGCTTAA…	VAVENPAVVAMPHGLQHLPEESSGQVLL*GSSFGDKVEEVLHRFGPLQDQHETIGPLEPVQKSNDAREVRAHLLQQDHFHGHSGAIGLQSEGEG*RAGSGTPVATHPPMRGSLAPAHSPVLPNRKSGPSPRA*WPPGRRPPSLHQTLLLKASLRAPSPRRRCPLTGKLSATRMPE*TEPKPPLPNSGPTWYCDSRGSFSLPRKEARDTQRARPTRGSPGVPTTRAPRVGWGHSPGASLVACRSLQGAARRHL*NVDGQA*YLMPETPALRRPPASSRPACST*SKEASFSDSFYLEELRGDGRTVVRISLRGSPGMSEVHR*LLAACLSYGLASSQMQILKMHFSFI*EPLLPPPPGPTHYAWNL*C*AILPMV*HIVSPVKGRAGTHHEILAQQNTCP…	16.3996	2.39615e+06	error	31	10.3333
EMBOSS_397_3	3	EMBOSS_397	ENSMUSG00000113774	ENSMUST00000220780	Medium	[P].QLCRTAPQTLSEDKTPR.[A]	QLCRTAPQTLSEDKTPR	AAACGTGAAGACAACCTAGGGAAAAAAAATGTATACAAATCCCCACAAAGCAAACATGGACGCGTTCTATTCGGGGGCTTGCGGGCATCTTGCAAGGCGTTTAAAAGCCTGCACAGGACAATGGGGGCAGTGGGTTCGGCAATTTAGCACAGAAGAAAACAACTTCTCCTCCCTGGAAAGCAAAGCAACCAAGAAGCCTCGGACACTGTCGCTCTGCCTCACCCGACCTCTCCGCCTCCGCACTGACCGTGTCACGGCCTGGCCGAAGACGGCGCCCTCAGCTCTGCAGAACAGCGCCGCAGACCTTGTCAGAGGACAAGACGCCAAGAGCACACAGCTATGCCCGCACCACGCCCGGCGGCCATCTTCCTAGGAGTCAGGAACTGACAGGTCACGTGG…	T*RQPREKKCIQIPTKQTWTRSIRGLAGILQGV*KPAQDNGGSGFGNLAQKKTTSPPWKAKQPRSLGHCRSASPDLSASALTVSRPGRRRRPQLCRTAPQTLSEDKTPRAHSYARTTPGGHLPRSQELTGHVVVWWAVLLVATPPGGGSVGGVAGAEVAWTPFPLF*RNGNIASLPGLASDGLGWVRLGWVGLVLIQSQSRPSRLQTCYVAKNDLYAPDPPASTSQLTQLN*C	1.8488	391047	93	29	10.3333
EMBOSS_194_1	1	EMBOSS_194	ENSMUSG00000097379	ENSMUST00000181390	Medium	[G].RQANPTKSASIPER.[N]	RQANPTKSASIPER	AGACAGGGTTTGTGTAATCTTGGCTCTCCTGGAACTCACTCTCCAGACCAGGATGACCTCAAACTCCAATCTACCTGCTGATTGCCACCATGCCTGGCTATGTTTTTATTTACTTACCAGACAGGGTCTTTCTACATAGCTCTGGCTGTCCTCAAAGTGTGTAGACCAGGCTGCTTCCTGAGTGCTTGGAATTAAAGGAAGGCACCACCACCCCGGCTCTGGGCCAATGAGAACGGCACCAAAAGACCCGCTGCTGCTCGTCTACCCATTACTGATTCATCTCCACTCCAGAAGTCTAAAGAAACAGAAGACGATCAGTTTCACTCCAATGGTCAAATAACTGTGTACTGACTGTCTCAGGTGATCCTAAAGCCAACTCACCAATGTAGTAAAAGCCCA…	RQGLCNLGSPGTHSPDQDDLKLQSTC*LPPCLAMFLFTYQTGSFYIALAVLKVCRPGCFLSAWN*RKAPPPRLWANENGTKRPAAARLPITDSSPLQKSKETEDDQFHSNGQITVY*LSQVILKPTHQCSKSPSVTD*RRKERTTDCIKLFYYLLHVNPESEDTGSSTTHKAQDKTLKTKTTTHEKSSLCLPSAGIKGVHLHAWLKTLSFNVLHASQISILYLENQVNFLRQV*KEYEKITFLRISLLLLCQILNVSEQPQNCNRNYY*LFFTLFFCVYMHPCVYTCVLKPEASIYSLPLPLPILFV*DRVCLSLNLVTVNKLQEFSCLHLFVVS*QTYLTTSS*LFMCAFGIQCHSG*LSFNIIMSHSIQNKTF*FTNNI*ILIHLEK*SNLS*VYSV…	1.54922	4.02656e+07	508	53	17.6667
EMBOSS_377_1	1	EMBOSS_377	ENSMUSG00000115801	ENSMUST00000226445	Medium	[E].ELEKLPK.[E]	ELEKLPK	GAATTCTTTGTTCAGCTCTGAGCCCCATTTTTTAATGGGGTTATTTGATTTTCTGGAGTCCACCTTCTTGAGTTCTTTATATATATGGGATATTAGTCCCCTATGTGATTTGGGATAGGTAAAGATCCTTTCCCAATCTGTTGGTGGCCTTTTTGTCTTTTTGACGGTGTCTTTTGCTTTGCAGAAGCTTTGCAATTTTAAGAGGTCCCATTTATCGATTCTTGATCTTACAGCACAAGCCATTGCTGTTCTATTCAGGAATTTTCCCCCTGTACCCATGTCTTCGAGGCTTTTCCCTACTTTCTCCTCTATAAGTTTTAGTGTCTGTGGTTTTATGTGGAGTTCCTTAATCCACTTAGATTTAACCTTAGTACAAGGAGATAGAAATGGATAAATTCG…	EFFVQL*APFFNGVI*FSGVHLLEFFIYMGY*SPM*FGIGKDPFPICWWPFCLFDGVFCFAEALQF*EVPFIDS*SYSTSHCCSIQEFSPCTHVFEAFPYFLLYKF*CLWFYVEFLNPLRFNLSTRR*KWINSHSSTR*PPVVPAPFVKNAVFLPLDGFSSLVKDQVTIGVWIHLWVFNSVPLVYLSVTIPVPCSCDHNCSVVQF*VRHGDSTRGSFILEKSFCYPRFFVIPDESADCPF*FIEGLSWNFDGDCIESVDCFWQDSHFYNVDPANP*AWEIFPSSEIFFNFFL*RLEVLIIQIFHLFS*SHAKVFYIICDY*EGCCFPNFFLSLFILCVQKGH*LV*VNFISGYFIDAVY*A*EFSVGIFRVTYIYYHIICKK*YFDFFLSNLYPLDLLL…	7.81892	3.56217e+06	1951	35	11.6667
EMBOSS_233_1	1	EMBOSS_233	ENSMUSG00000097138	ENSMUST00000181519	Medium	[L].QQVKNIGK.[K]	QQVKNIGK	GTGGAGCAAAGAGCAAAGTTTGAAAGGAGCCAACAGTTTTATACTTCACTCTACAAAAACCAAATTGCTTAAAAATAGGATACCTTCTGTAGGTGCCATTCATTGAATCTTCTGTCCAAAATCCAACAGGCAATATATACCCACTTAGTTCCTAGGTAGGAGTGGCTTGGTTCAAAGAGGGGAAATGGTAAAAAATAAGATAGTACCCGTAAAAAAACAACTTTCCTGCCTCATATTTTCCTAATCCCTTACTCCTAATCACCATCACTTAAAAAAAGAAAACCTGTTTAGGACCTATGGTACACCTTAAACTATAAGTGGCCTAAAGCATTCACAGAAGGGATACGTCCATGATAAGACTTAAGAACGTCTGCATAAGACTACAAGTTTCTGGTGTTT…	VEQRAKFERSQQFYTSLYKNQIA*K*DTFCRCHSLNLLSKIQQAIYTHLVPR*EWLGSKRGNGKK*DSTRKKTTFLPHIFLIPYS*SPSLKKRKPV*DLWYTLNYKWPKAFTEGIRP**DLRTSA*DYKFLVFKWAICTSYSLKLCGESLILRTVKRC*RNNTDKQRVIQD**TTLCRTQL*KKQG*EHCLSYGQCKYESRQHYCWLYHLHQNS*EPSRVTKH*ISPDAGNTVVHKACCPKLFLCSSSYMCWVLHGRL*NKHKVPEYGYKKFTFSFPQSHWKIQYLPHM*FTFYSFPHLSQGTLHSASNLQER*RHGKLWNDS*FLFSLCKYDLWE*SMTIDIYLSL*YLQQVKNIGKKKNTTDFLILQKYSGIYNFPV*GGFLCFWFLNFGGGGGEEG…	2.02333	4.88058e+06	351	185	61.6667
EMBOSS_306_1	1	EMBOSS_306	ENSMUSG00000112980	ENSMUST00000220477	Medium	[R].KELQDKISA.[L]	KELQDKISA	AGAGCTGCTGGCTGTGTTTCCCGCCCTCCGCCCACACACACCCACCTTCCTTGGGAGCGCTGCTGTTGCTTCTGTGTTCCTTGCCAGCTGCTCGGTGAGACGTCACGCTGATATCAGACGGAGGAGGGAGAGCAAGTCCGAGACTGCTCAAGTGGTAACCAAGAAGATTCTTGAAGAAATCCTGCCTCGGTTCGGGATCCCTAAGGTAATCGGCTCAGACAATGGGCCCGCATTTGTTGCCCAGGCCCTAGAGGTTGTTAAAACACAGATCTGCAACCAGATCAGAGAAGCCTACACTCCGGGAACCATAGCAGTGCCTCACGGGTTCCAGGTTGGAGACTCAGTCTTGGTCAGACGACATCGCACTGGCACGCTTGAGCCCCGGTGGAAAGGACCGTA…	RAAGCVSRPPPTHTHLPWERCCCFCVPCQLLGETSR*YQTEEGEQVRDCSSGNQEDS*RNPASVRDP*GNRLRQWARICCPGPRGC*NTDLQPDQRSLHSGNHSSASRVPGWRLSLGQTTSHWHA*APVERTVSGAVDHPHGSKSRRDRCLDPCLPRQKGTQPR*RQLDGGSH*QSS*ASLGSQESPWA*RTTTHTSL*L*LGKFSVLIRIRSCLPPPKQRRQGHGGQT*PSASNR*FQLLEALPLI**EAMDSTAAQSTASGPYAEGQPPIIVANGIVLLPTMVIGNGLVVMFLTGLSSLFRTQGLESTP*WNCIKGLTVAPMI*TEY*SNLQTQEKNMTSRHG*GACGGD*FFMTIVESLGHQSWFV*ASVAPDPTSRT*PCSS*KAFVTASQAYHP…	1.77367	2.29901e+06	970	222	74
EMBOSS_207_1	1	EMBOSS_207	ENSMUSG00000097723	ENSMUST00000181052	Medium	[D].PALFQYVSPLPLQENENPPK.[A]	PALFQYVSPLPLQENENPPK	ATTATTATATATAAGTACAATGTAGCTGACTTCTGAGCACCAGCAGAGGGCATCAGATCTCATTATGGGTGGTTGTGAGCCACCATGTGGTTGCTGAGATTTGAACTCATGACCTTCAGAAGATCAAGTCAGTGCTCTTACCCACTGAGCCACCTCGCCAGCCCCCTCCTCTTTCTTTTAAATAAAATTTTTAATGATTTATTTATTTATTTGCTTTATGTTGTGAGTCCACTGTAGCTGCCTTCAGACACACCAGAAGAGGACTTCTAATCCCATTACAGGCAGTTGTGAGCCACCATGTGGTTGTTGGAAATTGAACTCAGGACCTCTGGAAGAGTAGTCAGTGTTCTTAACCGCTAAGCCATCTCTCCAGCCCATAAGACATTTTCTTAATTAAGG…	IIIYKYNVADF*APAEGIRSHYGWL*ATMWLLRFELMTFRRSSQCSYPLSHLASPLLFLLNKIFNDLFIYLLYVVSPL*LPSDTPEEDF*SHYRQL*ATMWLLEIELRTSGRVVSVLNR*AISPAHKTFS*LRIDWEGPGLGWVVPSLGLLSWLSKP*GASQ*AGPSMVSASAPASRFLPCLNSYPDFL***TVMWKCELKKLFFVPQIAVVMVLNHSNGNSKTHSTKQTPGKQACFLLPPLQCCSLHQQQMQSVKEENVGKFGLKELSAEHQ*AHSEILNVT*KSGCRLCR*TSEPRGVKQLSVTLQARCHFKLESCLSFPCSWLSAPLASAGAIFRATPLPYKAAEET*VIIVEILTRMFNT*KAHVCPSFS*PQ*TTSG*SIS*LEGCQQQGDARS…	3.7718	939200	error	20	6.66667
EMBOSS_157_2	2	EMBOSS_157	ENSMUSG00000097128	ENSMUST00000181207	Medium	[K].GKGYNIAVTFGESLVLIFNVLPSLADAAGNLTLMV.[F]	GKGYNIAVTFGESLVLIFNVLPSLADAAGNLTLMV	GCAAACATTTAGTGAGTCTCTGATATGCATCTGGGACTATAATGGGTCTTAACATTCTCTTCTAATTTTTTTATTTTTTTTAATTTGCGAGACAGGGCTTCTCTGTGTAGCCCTGGCTGTCCTGGAACTCACTCTGTAGACCAGGCTGGCCTCGAACTCAGAAATCCACCTGCCTCTGCCTCCCAAGTGCTGGGATTAAAGGCACGCACCACCACTGCCCAGCTCTCTTCTAATTTTTGCAACACATCTGCATTTTCTTGATGAGATGCTGGAGAAGTGAGAGGTTAAGAAAGTTTCCTAAGGTCACAGACCCTTTTAATGGCAACAGTTGGAAGGGAAGCCCAGTCCCTCCCTTGGCATCAGTTTCTTTAGTGATGTTTGACACTTTCTAAACACCAG…	QTFSESLICIWDYNGS*HSLLIFLFFLICETGLLCVALAVLELTL*TRLASNSEIHLPLPPKCWD*RHAPPLPSSLLIFATHLHFLDEMLEK*EVKKVS*GHRPF*WQQLEGKPSPSLGISFFSDV*HFLNTSNIL*LLSYFPQCQVSGEIFISAYLLNTAEDAT*RCPSILHEYKRWLHS*VARLRVMPIFFFNYNKAGCGKATSATVYESVLSFTRDQEEKRLPPLRLATCLREYPAPCPSHLDTWSSGMLLEEEDPASQGPPSWGGRADPHGDRDTGRAARVGNPVPRGGAKWQRSRREREAREAGWTLPGAESGPGPGRFGRAAGGRAASLQRSREPCHWTAGCPPSPRRPSGPSAYPWPRRRLPGLPCW*GPAPARR*APRRPRCSQNRSRHGV…	3.50314	542734	error	25	8.66667
EMBOSS_024_3	3	EMBOSS_024	ENSMUSG00000086290	ENSMUST00000144705	Medium	[N].SGPHAFPLLMK.[I]	SGPHAFPLLMK	TCTGTTGCCATTCATCTTAGCTGTTGATGAAGATTGTGAGGAGGGAGACCAGAAGATAATGGACAACGATACAGCAGAAGGGTCTGGTAAGCTCCGTTTAGTTGCACTACCCGGGGAGACCTGAGGCATGTTTCCAAGGGCTGTGGCTGCCTGTAGCCATGGGATCTCCAACTGCATGCCAGAGTAATGGAGAGACTTTGACAGCTCAGGTCAGCACAGTGCCTGCAGCTGCCACTCATCTTTCCTATATATGTATATCAGGCCTCAAGTTGAGCGCCCTCTACCTGTGAGGCTATTGTTCTGTGGTATTTACAACAAATGTTTCTTCTGCAGGTTACACTTGAGCTTATTTCTTGGAAGAGTCTGAGAAGACGGCCTGTCAGGCTCCTAACACTAAGG…	SRFIRGPCLFSLWRLVLLPNVARPPSSQPTSSVRLSG*FVRYRACREGTGFFRLVQGSTGYGHMRSDNSGPHAF*PLLMKIVRRETRR*WTTIQQKGLVTLELISWKSLRRRPVRLLTLRAM*PVKQPLYMIWSTLVG*A*GLLTLFLSSIAEIQVCIVASHL*ATSIIYV*TS*LFTSGAKMCAMLAGICQLNIA*VQTLVHDETHYQWTSMDEKCGYGTETSS*ESLSWGMSLKVELT*TCTSFSEKFHKRISWKLAEVFGLYIARQPLESELQSD*GQPGLH*ETSFWESEILCQLTCSWFNKDFWKX	9.53648	2.78596e+06	error	27	9.66667
EMBOSS_030_1	1	EMBOSS_030	ENSMUSG00000073147	ENSMUST00000101522	Medium	[S].DKTSLGGLNRR.[L]	DKTSLGGLNRR	AGGCTCCGGGCACCGGATAAAAGCGGAGCTGGCGAGTCCCGCGCTGTCTCGATGGAGGAGCGAGAAACGCAAGAGGTCGGGGGGAGAAGCCGCAGAAAAAATTGCAGCCATCGTCAGCGCCGCCTCCCTGCCACCGTGTATGGGGTAAAAGCTGCCGTTGCCGCTGCCGGTGCAGTCGCTGCCGCCGCCTCCTATACTTCTTAGCACCGGGGAAGGATTCCCCGCCGCGGGACAGTGTGCTGGGCGGGGAGCGGGAGTTCGTTTGTGTGGCGGTGATTAAACGAGGGAGGGACAGAGCTGGTTTCTCGAACCGAAAAGGGGAGGCCAAGGAACAAAACAGGGTTCTCCACTAAAATCACACAGCGATTACGGATCTGGCTTTGGGGGCCTTTCCCCGGA…	RLRAPDKSGAGESRAVSMEERETQEVGGRSRRKNCSHRQRRLPATVYGVKAAVAAAGAVAAAASYTS*HRGRIPRRGTVCWAGSGSSFVWR*LNEGGTELVSRTEKGRPRNKTGFSTKITQRLRIWLWGPFPGMAVSVFLARSTTLGAP*EEWGEAEAVSAANRRLVISVGRVGIG*R*PHAAAAGGARVVGGGCCKGRE*EVMTVIVVAASSVEPKQCRRKSQGSSPTFCSSPCAR*GPWLGLCETLGRWCGRGGAISPVTFVTASGQDGAGSPWGAGGEARPPPPQRM*PAAFLWGLAGTQAGRGRGPGLGGGDGGAVGVGCPKRKR*LFESSSPPPLPAAELLRGGGEPLKGHSFRGVPATGGGEGLTPSYICLSPCKVCLRKVAVPSCKPTRRP*…	2.00431	2.37568e+06	error	52	17.3333
EMBOSS_360_2	2	EMBOSS_360	ENSMUSG00000110605	ENSMUST00000212145	Medium	[G].GAERSWSQLATANELGTPK.[T]	GAERSWSQLATANELGTPK	TTGAATGGTCCTGTGTGCTGTGTTCTCTGTCCTGCCTCTGGATGCTGTGGAGGGTGCTCAGGCAAGCTCCGAAGTTGCGACATGGATGCATTGACCTATGATGATGTGCATGTGAACTTCACTCGAGAAGAATGGGCTTTGCTGAATCCTACACAGAGGAATCTCTACAAAGTTGTGATGTTGGAGATCTACAGGAACCTCAAAGCTGTAGGATACAATTGGGAAGACCAAAACACTGAAGAACATTGTCAAAGTTCCAGAAGACATGGAAGGTATATCCTGTGTCACAATGGATACAAGCCATGTGAGCATAGGGATATTGAAAGAAGCAGAACCTTCTCTCTCTCTCAAAACAATTAAAATATATGTAATAGTCCACATTTGAGCAAACTTTGTGAT…	SCVLCSLSCLWMLWRVLRQAPKLRHASKPRG*YLWRYVSARSSAIKLPHVFASRRSLMILWVRAIS*LEWGYPHGGLSFGGSTKICVTPRNPEDPLEALQQKRPAVQAHGPGVLGPTSEMASATLHRHLPHHHHIPQRPRDGRRRGAGPAGFTSALTRFPESGCTRVTAPTSPTPDPGPRCCRQTDRKKKKRLWEWPARSTASSLAASDTCLIIFPFPLHPTCPSPGFGSSRVPLVSRKSAFTLRCQWPSWAPFAAPCVLSGGSALSCWQ*VCSKFHRGRHLPTWGFSCPR*GASVSLTARL**WSHLCGDKKCPNNLTKIIKNYRS*KKTG*VGKKVQRKKNKRKKRMKKTDVYRGLERSELRL*ERAKLQQTQER*MTVTNREVNSKEK*RREREAR…	3.12889	7.36156e+06	998	5	2
EMBOSS_299_1	1	EMBOSS_299	ENSMUSG00000108621	ENSMUST00000188038	Medium	[V].KKQVAMIAYLSLCYTVWNPNLGNNATTFTMGLPVSVIPYR.[Q]	KKQVAMIAYLSLCYTVWNPNLGNNATTFTMGLPVSVIPYR	CGGACACGGGTACGAGTGGGCCCCGCTTTCGGCGCTGGTACCAGGAGCTCTGAGAGGAACGTGGGCGAGCTCGGAAGCTGCGCCATGGATCTCGGGTTTCCCAAGTTGGCCTCAAACTTTCTCTTAGCTGAGGAGGACCTTGAACTTCTGATCCCGCTACCCAAACCCACCTCCAGAGTGCTGGGATTAAGGGAGTTTTTGGCCTTTGAGGATGTGGCTGTGGAGTTCAGCCAGGAAGAATGGGTTTTGCTGGATCCTTCTCAGAAGAAACTATACAGAGATGTGATGCTGGAAACCTGCAATAACCTTTCTTCAATAGGCATCAAATGGGAAGACAAGAACATTGACGAGCAGTACAAACACTCTTGGAGATTCCTAAGGGGACAAACCATCTGAACA…	VLCVGSPWRTRVRVGPAFGAGTRSSERNVGELGSCAMDLGFPKLASNFLLAEEDLELLIPLPKPTSRVLGLREFLAFEDVAVEFSQEEWVLLDPSQKKLYRDVMLETCNNLSSIGIKWEDKNIDEQYKHSWRFLRSCMIDAIYEHREGGQFQETFTWIPDFHRSTDISTEVKPFECGVCGKVFTCHSSFNEHIMSHLGDKPSEHKHGSCGIQQQSQSVEKSYKQCGMAFACHCSLSIDGRTNSKDKCYKCEQSSKALSSSSSLQSHKTVYGAGRTYECEECGKSFRHESSFLLHQLTHIGRKSYECKQCGKAFRCHSYLQLHENFHIEENPYECKQCGKTLCSPSSLRVHERIHNGEKLYACKRCDKTFKCQSYLRIHERTHTGERCYDCEQCGKAFRS…	3.54781	1.57045e+06	error	85	28.3333
EMBOSS_171_3	3	EMBOSS_171	ENSMUSG00000097207	ENSMUST00000181209	Medium	[G].GVQANMMLEKELR.[A]	GVQANMMLEKELR	AGGCGGCGGTGCTCAGTGGTCGGTTACTGAGGGGCCTTGTGGCAACAAGGTGACATAGGACAAACAGCACTCAGGTGAGCACCTGGAAAAGGCTGTTGAAGCACACAGGCACTAGAACTACTTTATGAGCATAATTCCTTGGACCATAATCGTCACCTGAGGAAGCCGCGTGAGACACCAGTCTTAGGATTCCAAAGTGAAGAGGAACGTGCCCTCCTCGATGAACGCCTGTGGAAGCCTTTGAGCAGCCCTTTCATGGCGGAAGAGAGGGCAACTCTGAGGTGATGGAGCAGCGGCTAGGCAGAGGGCTGCTGAGGAAGCAGAGGGAGGATCGCTTCAGCTCTCGGCAGGCTGGAGCCTCAGAGCAAACCTCAAGTAACTTTCTGTGGATGCTGTGAG…	AAVLSGRLLRGLVATR*HRTNSTQVSTWKRLLKHTGTRTTL*A*FLGP*SSPEEAA*DTSLRIPK*RGTCPPR*TPVEAFEQPFHGGREGNSEVMEQRLGRGLLRKQREDRFSSRQAGASEQTSSNFLWML*GFPLL*RVTTTKATLTKDNI*LGLAYNFRGLVHYQLGRKHGGVQANMMLEKELRALHLDPTASKRRLTVSQAPRRRESKPTPQ*NTFSNKATPPNNATPWAKHIQSTTPSLGTHFHK*ECRGSVRTESDFRCRYCHSKDHAPDGYSITTCLKDTDIDTLWEFYILYMRIPSSHLTSIPSSPPLYLANYLYLSVYF*KLLCNTFTLMW*LPSNIGTDYKPCLGHEDSQYPVQINDFPFSLMLA*SC*SPLNLILTRYMHANWLL*IYF…	6.81367	3.01402e+06	174	125	42.3333
EMBOSS_110_1	1	EMBOSS_110	ENSMUSG00000093846	ENSMUST00000172838	Medium	[S].VNPEHAAQSMNAVAVAVR.[A]	VNPEHAAQSMNAVAVAVR	GAGGCGTCCCGGACAGCGGCTTGGTGGCGCGTAATTCCCAATGACTGTGCGCGCCCGCGTCTGGGCTCGTTTGCCAAGGACTCGGAAGCTGCAGCTCCCAGAGCACAGCGGGCAGAGCTGCGGGCTGTGCGCGCCCCTGCTGCCCCGGGCCTCCAGGGGTGGCTCCCGCGCCCCGCGGCGACTTCCGCGCCCGCGCTTCCCTTTGTTCAAGTCCCGGAGCGGCGTTGGGGTCCGAGCCCGTGCCCTGGGCGACTGAGGCGGCCGCAGTCCGCGCCCCGGCGCCCTGGCGATGCCAGAACAGATCTCCGTGTCGGAATTCATAGCCGAGACCCTTGAGGACTACAAGGCGCCCACGGCCTATAGCTTCACCACGCGCACGGCCCAGTGCCGGGACACCAT…	EASRTAAWWRVIPNDCARPRLGSFAKDSEAAAPRAQRAELRAVRAPAAPGLQGWLPRPAATSAPALPFVQVPERRWGPSPCPGRLRRPQSAPRRPGDARTDLRVGIHSRDP*GLQGAHGL*LHHAHGPVPGHHVGHRGGCGDL**CACELHWGRVEFAGSFSEESLQRYDAGDLLEPHCYRLHLGKPSY*KTLSKFKKK*KPLFSSRFPKCLSRLEPRL*SAGQTQHLANQWGTEKWQRNFGRGTAGLELHGIIKG*RKFIQEKVPPSACTLTPWLSNQNSWKLLNLGTLKHFEKIWTRWSTGYPRSVKLVCIHCRRHASVNPEHAAQSMNAV*AVA*VRAMMSMLQMPHSGGGC*PDGPGNVSVPVSQCFYESKTALK*SQLKIHMGPKELKGFATP*…	2.25443	7.46743e+06	error	41	13.6667
EMBOSS_320_1	1	EMBOSS_320	ENSMUSG00000099881	ENSMUST00000186531	Medium	[V].KYMSAYIKK.[S]	KYMSAYIKK	GTCCGGGAATGATTGGCATCCGTGCGTAGGAGACCCAGGCGGAGAAAGCCGCTGGATTGGCTGACCTCCCTGCCACGGGACACGACGATTGGCCCTACTCGGTGCCGGAAGTGATGAGGCCGCGGTCTGGAAACAAGGTTGTTGTCGAAGGAGCCAGAAGGTGGGAGCCGGCTTGTACCGGCTGGCCTTGCGCTGCGGACGCGAGGTCGTGTGTCGCCTGTGAGCCTGTGTGAGCTTCGAGAATGTGTGTCTCTAGCCGGCAGGAGGCTCTTGCAGGAGCAAAGGCAGCCGGGATGATGGCCGCGAAGGAGAAAGGCGGCCTCGGCCCCCACCCGCGATCCGGCTCTTTCCTGGAGGTGTTCCTGGACTGCGCTTCGCTCCGAGTCCCGTGAGCCACGT…	VRE*LASVRRRPRRRKPLDWLTSLPRDTTIGPTRCRK**GRGLETRLLSKEPEGGSRLVPAGLALRTRGRVSPVSLCELRECVSLAGRRLLQEQRQPG*WPRRRKAASAPTRDPALSWRCSWTALRSESREPR*QPGCGELQTLPGGFLRHRARFSRLPSPAPELHRDGS*NNNNNKKKG*RTSELGSKVASSCA*LFEFTERGKSLMMVCVSSDLVCKRAKNSNPSAVVTETGVSGAQSTLL*TFRVQDLSSMKPLSQKNA*SNCDESDMLV*AFYPGT*AEAGWISEFRAS*GYTVKANFII**NIK*QVTRAGEMARRLRARAALLGTHLRQLHSHLQRT*HLLTFQELTPE*STHTYRLHINLLK*MGPGEMTCRSKALTGCSSRGSGFDSRHL*…	1.37377	8.52946e+06	610	9	3
EMBOSS_316_2	2	EMBOSS_316	ENSMUSG00000105402	ENSMUST00000198582	Medium	[L].ELVLESWKGR.[C]	ELVLESWKGR	TGCATGCCTTCCCTGCCCTCTGAGCTCACCACACTGAGAAATGAGTACGGGGGGGGGGGGGGGGGGGGTGGTGCCTTCTCCTGTCACGTTCCCACTCCTGCCCATCTCCATCAGTACATTTAGAGAAGCATCGTCCTTACTCCTGTAACGCTGGCTTGAATTCTTGTATAATTCTGCCATCAGTAAAGGTCCAGTGATTGTTTTCATTCTCGATAGCCTCCAAATGAAGATTGTAGCCTCATAACCCTCGCTAACCTGAGTGATTCTGAAACTACACAAGCTGCATTTGGGAGAAGGAGAAGTGTCTGGGAAGGGGCCCCGAAGAGAGGAAGAAGAACAGACGGAGACCAGGGGGAACTGGGAAGGAGCAAGTGCGGAGGCGATCCTGAAGCTGCTGAG…	ACLPCPLSSPH*EMSTGGGGGGVVPSPVTFPLLPISISTFREASSLLL*RWLEFLYNSAISKGPVIVFILDSLQMKIVAS*PSLT*VILKLHKLHLGEGEVSGKGPRREEEEQTETRGNWEGASAEAILKLLRKEDG*ARLKLFCCRNARKI*EDPERILWQRAHLVFGRHLFVVVVVTTYIPPPCSHMKTIISQFRKSVLIVSLASKDPAPFTRSD*LQRQLGRNSGLGVS*AFLVGNCLELVLESWK*GRCPI*GGREEFIPECWRDGLRETTSLGLTCTRYSTSSTGETRAPHRGQGPDFLPQMCDPRQIHQNLGISIYSGVCRVSTSPSAKHKYLLFSLLALHHDNCKLIFIFRQQ*N*TQYEHFALMDITESLHICARGRG*YNGEPYTPGSFR…	0.724219	2.37568e+06	error	4	1.66667
EMBOSS_285_2	2	EMBOSS_285	ENSMUSG00000108867	ENSMUST00000208542	Medium	[E].REQQLLQQR.[Q]	REQQLLQQR	GAGACAACCACGGCTAAAGAAATCTATTCACATATTTTTTTTAAAGTAATATCCCTGGTTGTTGTGTAGCTCTCAGCAAGGACCAGGTGCTTCCTGCACATTGACAAGCTGCTTCTTGGAGAAGAAAGAGTGCTCTGGAAATTTACAGATGAAAGGGAAAAGAAAACGTCATCATGGTCAGTAATGCTCCTGGTTGTTGTCTAGCTCTCAGCAAGGACCAGGTGCTTGCTGCAGATTGACAACAAGCTGCTTCTTGGAGAAGGAGTGCTCTGGAAATCTGCAGATGAAAGGAAAAAGAAAATGCCGGCAGAGACGGCGGCAGAGGCAGCGGCAGAAGCGGCAGCGCGAGCGGGAACAGCAACTGCTTCAGCAGCGCCAGCAGCAGCAGCAGCAGCAGCA…	RQPRLKKSIHIFFLK*YPWLLCSSQQGPGASCTLTSCFLEKKECSGNLQMKGKRKRHHGQ*CSWLLSSSQQGPGACCRLTTSCFLEKECSGNLQMKGKRKCRQRRRQRQRQKRQREREQQLLQQRQQQQQQQQQQQQQQQQQLLQLQLQQQCQQQQQQQQQCQQQQCQQQQQCQQQQQFQQEQQQQQQQQQQQQQQQQQQQCQQQQQQQQRRRRKNRRSRRSGKX	1.16168	848682	117	149	50
EMBOSS_101_1	1	EMBOSS_101	ENSMUSG00000097722	ENSMUST00000180725	Medium	[E].SRESLWLAVR.[S]	SRESLWLAVR	CCAGTGCTCAGGAATCTGCTCTTGTGATGACTGCAGAGGCAGCTCCCGTGAGATGGAGCTTTGGGGAAGGGAGGAGTGAAGAGCAGCAATACACAGCCTCCTCCTTATCCTCAGGGCACCTCAAAACTGTATAGCACGGCACGTTGTGAGAGCCGTGAGAGTCTGTAATGGTTAGCAGTACGCAGTGTGATGCGCTGGATCAAGGAAGGCTTCATGTGGACAACTAAGGAAATCAGAGCCTGGAGCTGCTGTGACCTGGCCTGCCTCCCCTAGACGAGTCTGGATTCCCACCGACACCGGCACGCCCTCAGCCTCCAGCCCTCATGCTGTTCCTGCAGCCCAGGCCTGGTTTTTATACTGTCCCAGGCCGAGTCCCGGCTCTAGGACCCACTCGCTGGG…	PVLRNLLL**LQRQLP*DGALGKGGVKSSNTQPPPYPQGTSKLYSTARCESRESL*WLAVRSVMRWIKEGFMWTTKEIRAWSCCDLACLP*TSLDSHRHRHALSLQPSCCSCSPGLVFILSQAESRL*DPLAGWHLGSGFLMSSLRLQSLASALCPSDKRGSNPPAQPLMASSLQTSKTPRCSLWWLSLCCLPWWEEAPGSPSPALCSLMLACLGSHHLFSSLFPQT*NGHVTHCLLRGHIQAETR*RALTRCLLS**RQCLWQQLPHRHKSKTINKNRDCLCCHHRRVLTSGL*VLHCQESALDLEDALLTWACLKMCMMKMVRPRPKM*AAKLV*K*VCVFFFKLQGRRKEEVRRVTSFLQRLKLHMCVGRVSARRLDSCAPWPSLSYVSLDKLPFF…	1.91728	2.37568e+06	error	27	9
EMBOSS_264_3	3	EMBOSS_264	ENSMUSG00000110605	ENSMUST00000212180	Medium	[F].AGMKEVILEK.[N]	AGMKEVILEK	TTGAATGGTCCTGTGTGCTGTGTTCTCTGTCCTGCCTCTGGATGCTGTGGAGGGTGCTCAGGCAAGCTCCGAAGTTGCGACATGGATGCATTGACCTATGATGATGTGCATGTGAACTTCACTCGAGAAGAATGGGCTTTGCTGAATCCTACACAGAGGAATCTCTACAAAGTTGTGATGTTGGAGATCTACAGGAACCTCAAAGCTGTAGGATACAATTGGGAAGACCAAAACACTGAAGAACATTGTCAAAGTTCCAGAAGACATGGAAGGTATATCCTGTGTCACAATGGATACAAGCCATGTGAGCATAGGGATATTGAAAGAAGCAGAACCTTCTCTCTCTCTCAAAACAATTAAAATATATGTAATAGTCCACATTTGAGCAAACTTTGTGAT…	EWSCVLCSLSCLWMLWRVLRQAPKLRHGCIDL**CACELHSRRMGFAESYTEESLQSCDVGDLQEPQSCRIQLGRPKH*RTLSKFQKTWKVYPVSQWIQAM*A*GY*KKQNLLSLSKQLKYM**STFEQTL*YKFIISWLSNFSGNISINSLQKIPINTRIVEILLCLSWFIMSL*YIS*YRKIYEYTQCGKALSSSISLEICEKPHREKGCKKS*DVSCLYN*TKL*D*FLQIKRIINVVNVVKLSHVPIIFAGMKEVILEKNPLKILNVVKPLQIKVMSMYIKEYILERNPMNVISVVKPLHKRLISKYIY*HILERNLTNVINVIKPLHLIVLSKYIKEHILERNPMNVNSVVKPLHIIVISKYIKEYILERNLX	3.12889	6.51564e+06	254	5	2.33333
EMBOSS_100_1	1	EMBOSS_100	ENSMUSG00000096919	ENSMUST00000180684	Medium	[R].KDIFSKVYL.[E]	KDIFSKVYL	GGTCCAGTTACAAATTTCTTTGTAGCTAAAATCAATCGGTATGGAGGCAATTAAGGAAAGATTAGCAAACAAACTGAAGCTGCTTTTCGTCCATTCCCCACATTCCAAGCCAAGAGAAAAGGATAATAGCCTAAAAAGCAAATGGGAGCTGAAGCTGGTTTCTCCAACCTATCTGAAAAGTCTTTATGCAATCAGAGGGCTATTATTTCAGGAGACAGAGTGAAGGGGGCAAAAGATTCACGTTGCTAAGGAGATCTGCTGAAGCTGGCATTCCTACATAAATTTCCATTTCTATTGAAGGGAGAAAGAAAAGATATTTTTTCCAAAGTTTATTTGGAGCCCCTGGTTACCAAAGAAAGGCATTTTGTGGGTTTATTTTATCTTCAGTTGTAAACAACT…	GPVTNFFVAKINRYGGN*GKISKQTEAAFRPFPTFQAKRKG**PKKQMGAEAGFSNLSEKSLCNQRAIISGDRVKGAKDSRC*GDLLKLAFLHKFPFLLKGERKDIFSKVYLEPLVTKERHFVGLFYLQL*TTNPERIKKPEC*PPAANQSPSLRINQQRKPSIGILR*QQRKSLCKHKIKFLEEI*LSELISPITKNVRQRKVGFVCVCVLARASIKKKKKKKKHPAEPPFYIP*SVHTAAAEETEFK*Q*FSARNWKLANS*EWDSGNGVKNKTKQKQKLEDQEENKATKSL*ASSHNGYRLLYPVSHPHTIFTAC*MKQNFPGNCE*LAQRKRSGRKGSFLLWE*KKGNSEATMVSPKKERKFISLS*LSVSLPKI*RGNTHTHTHTHTHTHTHTH…	6.6073	2.19159e+07	104	41	13.6667
EMBOSS_173_2	2	EMBOSS_173	ENSMUSG00000097479	ENSMUST00000181481	Medium	[K].QLTLKQNVQ.[Q]	QLTLKQNVQ	TCCTTTCGGTTCCGGGCGGTGGACCGGAAGAGCCTAGTAGTTTATTTAGCCGAAATTGGTGGGATGAGATCTGTTGACAGACCTGACAGGAAAAAGGACCCTGGGACGCCAGCCTGGTAGGGAAAGATTTGGGGTGGAGCCCAGAGAGGACCAGAAAGCAAGAAAGCCTCTACGCTATCCTGAAGAGTTTTTCAGAAAAAGGAGCTGGAGAGATGGTTCGGCATTTAAGTACACTGCCTGCTCATCCAGAGATCTGAGTTTGATTCCCAGAATCCACATGGCAGTTCACAGCAGCCTGGAGAGTGGAGAAGTCTTCCATGTTAACAAGCAGCTTTAAGTGGTCACACGCGTTTACTCCGCCCGCTTCTTGCTTGAAACACCAGAAATCTGATATATACT…	PFGSGRWTGRA**FI*PKLVG*DLLTDLTGKRTLGRQPGRERFGVEPREDQKARKPLRYPEEFFRKRSWRDGSAFKYTACSSRDLSLIPRIHMAVHSSLESGEVFHVNKQL*VVTRVYSARFLLETPEI*YILIDPTVTR*PSPFLWFTGTCYKDRQQSSS*KLCSQNCLKIHVKIKRCPPRLKFRSHLGADISSRVVQNE*QFPSPTHKSCHSSL*KLQYPHSGSRAVWGNLTASKM*QNVHHVV*LFQELSDYGFIVHTGAERKVN*RLNGLLPSNTHDSLPPPQNTDVN*RTR*IISIHFTDLKDTAIFIHQ*FSSTFCSCVALQCSNS*TTPYRITSKTGMM**KAPSCLLHYQRTEYRKDSFHWTQLKGERGGVC*AAIHPSLYSRGQIEN*QN…	21.2351	50879439	531	64	21.6667
EMBOSS_319_1	1	EMBOSS_319	ENSMUSG00000115092	ENSMUST00000227784	Medium	[E].FWFSLLNLTKGAR.[M]	FWFSLLNLTKGAR	GGTTCATCTATGAAGCAGCTGGCTCCAGAACCTTCTGCCTGCCTAAGGCCGAATAATGCTCTGCTTCTGAGTATGCTGACTTGGGTTGTCTGTTTACCTCACTGCTGGCTGCTGGCTGCTGTCCCCCTGGGAGCTCCCTGCTTGGCTGCTGTGGCTAATGCTGCCAGGAGGAGCAGCGCTGTTTTCTGTGGACCCTTGTCTAGTTGTGGCGGTTGCTGGGAAAGATGAAGTCCCCAGACTGGAGCTCAGGCTGCAAAGAGGCTGGCATGAAGCGAGATGCCCCTTCTAGGCCAAGGCAAGATCTGCTGCCCTCTGACTTCTACCTGTTGCTGAGATGACTTCTGTCGCCAAGGCACCTGGATACCGAGCCACTCCTTGACAAAAGCCCTCTCCAGCCTG…	PEPSACLRPNNALLLSMLTWVVCLPHCWLLAAVPLGAPCLAAVANAARRSVVQESLSSGPSSSSSGATSRSRRRTLGAVSTLLTDPVHHGSNDSRFPSLLCFLASTGPATTSPIWMLCKEEEWTLARTQLPPRGAWRDRFCKCLSAQSQV*NVASLELACWLPQMHHGRSSACSETVSSQEGISLLVWTRSCVCLCARARVCACARARAETKAVRDPTKTTHRFLG*AI*CAGNSIWHTGVVMAVGFITEAKTRGGGGRRRGAARGRE*FWF*SLLNLTKG*A*RMCLAAGTGRALRHHAEGAAVWLSPPTRSPSSAPCCPHTSSGPHPRLGVGWRGKRGFFADMYD*VTEKGP*PSKACNDTTLCLLLNTPDLEVTPAGLIYDMLM*LFQTPFFCLLS…	2.46079	6.04558e+06	error	10	3.33333
EMBOSS_240_2	2	EMBOSS_240	ENSMUSG00000097928	ENSMUST00000181702	Medium	[R].VSFNGKAASNFALIL.[E]	VSFNGKAASNFALIL	GCACTCAATCAGGGCGATCCTAGGCTCGCACGGCGGCTGTCCACCGTTTCCCTCCGCCCACCGCGCCGACGCCCGGGCGCCCACGCCACCCTTTCCCCGACCACCCTCTGCGCAGCCCGGGCCCAAGCGGCGGGACGCAGGCTCTCGGACCCGGAGCCGGTTCCCGCTTCTCTCGCTAGAGGGCAGACGGGGCCCGCTCAAAGCCCTCAGACCGAAGGGCACGCGCAGCCGGTAGAGATCCCGCAATCGGAGCCGCACTCCGGGGCTGGGCTCCGCGACCAACGTGGGGTCCGAGATCAGAGCCCGGGAGCGCGACGCACGGCAGACCCAGAGGACCCGGGAGGAACGGCCAGCAATCTCGGGGTGCGCACAGCGCACGGGCACCAGGTGGAGGCGGCG…	HSIRAILGSHGGCPPFPSAHRADARAPTPPFPRPPSAQPGPKRRDAGSRTRSRFPLLSLEGRRGPLKALRPKGTRSR*RSRNRSRTPGLGSATNVGSEIRARERDARQTQRTREERPAISGCAQRTGTRWRRRRHGSSGTRLGAKRAARGHTGRG*VPAWEQRSGWHSPGLGSPSAGAGFPRDPRSFFLPFPLPLPSLRSDISLKMSALRGPGWATVTRDKFGPRACRKVCPGREEPVAGLRGGVACRLQGAAWTRSPGAPATSGGVSGLLLCPGSCRCRLWSGLAPVAVSLPYSPKRERCSQSGLCSHLPAAAAAALRSAPAAGAARSSHKFWGSPSRLFFNCPQVGRRRLLRTLPLASPPPSFPTTPPPRGADTPPGGA*AGRSRLSPFLLAAGPA*…	1.41752	1.04136e+08	error	617	206
EMBOSS_401_3	3	EMBOSS_401	ENSMUSG00000113495	ENSMUST00000222522	Medium	[S].NRSLGAAGRPQQFGAR.[T]	NRSLGAAGRPQQFGAR	GGTCAGTTTTAGTTTTAGAAGGAAACACTTATTAAATATAGGTGGGCATGTTGTTCCCAGATAAAACCTTTTTTTTTTTTTTTGGCTTAATGAGGCTGAGTGGTTCAGCCTAGCTGGTTAGAGTAGTTAGGACACAGTCCCTAGTCCTAACACTATTAACAGAAGTCTCCCATTGTAGTCTCCCCTCCCCCAGCCTGAAACCTGTTTGCTCTGGGGTGGAGCTTTTTGCTCATTCGTTCTGCCACGCCCACTGCTGGAACCTGCCGCCTTGCTGTTCCAAAGCCATCATGTGCTCACCCTGCTACTGGATTCCGAGATTATTTGGTGGGAATCGGGTCCCCTCCCCCTTCCTTCATAACTGAGTGTTGCAACAGTAAAAATTGAACTTTGATCAGAGTG…	SVLVLEGNTY*I*VGMLFPDKTFFFFFGLMRLSGSA*LVRVVRTQSLVLTLLTEVSHCSLPSPSLKPVCSGVELFAHSFCHAHCWNLPPCCSKAIMCSPCYWIPRLFGGNRVPSPFLHN*VLQQ*KLNFDQSDF*LGSVLSSARLVLLFQPELPSQSNRSLGAAGRPQQFGARTGTWRMAEGC*ENAVGVELHRKGKRSSYQTPKQ*TGQSTFSSRTSGCASPPP*SAMVAAAIFIPRTFQHVVFSLS*NLGLPRGLEK*IFLILIEIGFYFNRQA*SLSWPLAFYPCCYCKVSLVPQAVEITEMKRNDSQLLF*PRIVVLLMT*FLPRPC*I*G**FSFRSCTVLRTVHTGS*SYEYSMGIAWCKELLQGKVQLNHF*VSCGLYPV*KGGWYLILAKN…	1.92965	3.75041e+06	158	48	16.6667
EMBOSS_297_2	2	EMBOSS_297	ENSMUSG00000114384	ENSMUST00000224680	Medium	[R].KLQQKESIG.[S]	KLQQKESIG	ATTCCATCCTCCGGGTGTTTGTCACAGTTCAGCATCCAAGCTGAATCTCTAGTTACCATGGATGGAGATGACCTTTCCTGGCTATGCTAGCCAGCTTTCTGACCTCAAAAAAAACACCAGCATTTAAGGCCAAGAATCTGAATCTTTGAGTTTCCTTCCCCCACACCCAATCCACCTGCTGAAGCCTAGTGACCAGCTGAACAGAACGGAGAGGTAGAAGATTCAGGAGATGGGTGTCACAGGTCCTGTCAGCTGGGTGGCCAGCTTAAGTTCTCCCTTCTTCGGAGCAGAAGGCTTCCTGGGGAAAAGTATGTGCTTGAGGCGGTACTCCTTCAGGCACTGCACATTGGCCTACAGTAATTCATTCAGTGGATTTGTCGCCTCCTTGGGTCCACAGAG…	FHPPGVCHSSASKLNL*LPWMEMTFPGYASQLSDLKKNTSI*GQESESLSFLPPHPIHLLKPSDQLNRTER*KIQEMGVTGPVSWVASLSSPFFGAEGFLGKSMCLRRYSFRHCTLAYSNSFSGFVASLGPQRC*RQPHTVIWNKMGDVLMLYLDASIKTAKELCVARSTRSSDSVLAHSVISVDNSTMPPDKKARHARGLRKNACTLNRTLK*TGCCNCAFVGVLLHLKGLLLGNKDHFHLKQPWYLPFI*DLLGTFHLSETHCPSWGLQPFQNV*ETWIEHD*HPTAKWLPMKITDLSSRTQAEPSQKERWKGLTQTFMHKELLMPPRTGTCDPFYGLTLESRKCG*LSEKMAASTYLIPPKVIPMSSDSFVP*LPTGCPHVHGV*AGHERQTHIQN…	8.16797	2.29901e+06	529	58	19.6667
EMBOSS_062_1	1	EMBOSS_062	ENSMUSG00000038311	ENSMUST00000090537	Medium	[K].KTVNLIQ.[Q]	KTVNLIQ	GGGTCCCAGGGGGTCCGGCAAGCTCTGGGAGTTCCTTGGACTGATCCATCCCCAAGGAATGGAGGAATGCACTCTGCAGCTCCTGGAGCAGCTCCAGGTGGAGGTGCAGAATTTTGTCCTCTGAGTGGCTGCAGAGTTCTCCTCCAGGAAGGAGAAGCTTGGGTTTCTGGTCAACAACTATGACATGATGCTCGGGGTGCTGATGGAGCGGGCTGCTGATGACAGCAAAGGGGAGGAGAGTTTCCAGCAGCTGCTCAATGCTTGGACACAGGACTGAGCCCCAACTCAAGGGCAGAGGGAGGAGCTGCCTGTGGCCCCTGAACCGGTGTGCAGCAGCATTTCCTTCCTGCGCTCCAGCTATCTTTGGAGCCACTCCACGCAGGTGCTCTCCAGGTCATC…	GSQGVRQALGVPWTDPSPRNGGMHSAAPGAAPGGGAEFCPLSGCRVLLQEGEAWVSGQQL*HDARGADGAGC**QQRGGEFPAAAQCLDTGLSPNSRAEGGAACGP*TGVQQHFLPALQLSLEPLHAGALQVIVQGYVIATIVGCTASTRGGGSRRTLRHSHTTTGTSPSTQGPGASSMAHAAHISDSPRRCRSARTACSPRRRLPCTGASRGPAGTWQWRNTASSVSLRAARSETLTSSPDPGLVSGSGREQGAGLATWLEKGRRVGWAARGPGFPCAVPDPPMPPEAFSLPTPHPPVRVWVQARAVACSRSSFRCTCPLLAIRKGLSSEICQDFTTRALGQGGWFPKILLSNGGEI*EQVIH*CPGEGPDPG*EQK*NWGDGESRALGLPTPDLGWT…	1.06801	1.33584e+07	error	59	19.6667
EMBOSS_350_2	2	EMBOSS_350	ENSMUSG00000113559	ENSMUST00000221856	Medium	[R].EYIQERNLMNVINVV.[T]	EYIQERNLMNVINVV	GGGGAGACGGGCCTCGCAGGGGGGCCCTCTGGCCATTTCCCTGGACCGCAGTTACTAGGGTGCTCTGTCTTTGTGTAGAGCATTCTCTAGCAAAATGTCCAGGGTGTGTGGACCACCTGGGGATCTCCATTCCCACACACAGCATCCTCTCCCACTGAGGCCAGACATGGCAGTCCATTAAGGGAACAGATTCCAAAGATAGGCAGCAGCTTTATGGCCAGTCAGTGCTACAGTTATTGGAGGACCCTCATGAAGACTGAGCTGCATATCTGCTACCTACATGTCAGGGGCCTTAGTCCAGCCTGTGTATCCTATTTGGATGCAGTGACTTATGATGCTGTGCATGTGAACTTTACTGGGGAAGAGTAGAATTTGCTGGATCCTTCCTAGAAGAGTCTC…	GRRASQGGPLAISLDRSY*GALSLCRAFSSKMSRVCGPPGDLHSHTQHPLPLRPDMAVH*GNRFQR*AAALWPVSATVIGGPS*RLSCISATYMSGALVQPVYPIWMQ*LMMLCM*TLLGKSRICWILPRRVSTKM*CRKPTWTSLL*ATLGKTIILKDIVKVPEDMKGNLHVQADTHRPLRKF*YVLEALKKSKSAGQWWRTPLITALGRKKQADF*VQDQPGLQNM*DIAEERNPMNVLNVVKPFHFPVISNIIKEDILERSLMNVINVLKPLQITLSSKAIKEHILERNLKNTINV*NLFTRETSPKTKEDILQRDLMNITNVVKAFSQSSCL*KHKRTHIGQKLYECNQCAKAFAYLSSLQNISDPILERNVMNVINV*RPFTTL*SPVV*KEFL…	3.95343	4.78591e+07	429	95	32
EMBOSS_085_3	3	EMBOSS_085	ENSMUSG00000091021	ENSMUST00000172202	Medium	[A].QLYLQR.[C]	QLYLQR	AACTTCCCACATAACTCATCCATTCGACCAGTTTCCTATCTCACACTCCAGAGCAGAGGAAGGAACAATCTTAGTATTTGGAGGGACCAAGCACTCACTCAGGGTTTATCCTGACCCACCTGCAGCCTTCTGCTCACACACACACATTAAATCACAGGAAAAGACATTCAAATGCTTTAATTCAGATTTTAACTTATGACAATAATCTTACAGAGAATGTGGGAACAGAAAAATGACATATATGGTTTATATAATATGGTCTGGGGGAAACCTGTTGGGACCTCAAAAAATGAGAACCATGGTGAAGGTTCTCAAATCTAGACATAACCTATCAAAAGAAATGTATTTACCAGAGTTAAGTAGGCAGAAAAGCTTGCCCCAGCTTCTAATGGCCGAGGC…	LPT*LIHSTSFLSHTPEQRKEQS*YLEGPSTHSGFILTHLQPSAHTHTLNHRKRHSNALIQILTYDNNLTENVGTEK*HIWFI*YGLGETCWDLKK*EPW*RFSNLDITYQKKCIYQS*VGRKACPSF*WPRL*QTKF*HAVYNNYSVGAPADSLLSWKRGKKKQHKHQVPKVDIPKALGI*IFVSCMVCLLSHGPRDSEKS*EYAGADSKAQLHLQRCGKGLYITGQCPKLPFATRTEPGESDLPGYPRWNVWLAPKRLVNFNRRLHPPPPHTQCISLITYTWSRKH*ASLRVNVPPSTKYLKSLTGSAREDFNHHGPQDSEKS*EYAGADSKAQLYLQRCGKGLYITGQCPKLPLATRTEPGESDLPGYPRRIVMVMSFFLTKCHRVLLPDLQLEEK…	23.4192	980463	336	172	58
EMBOSS_006_2	2	EMBOSS_006	ENSMUSG00000021268	ENSMUST00000143272	Medium	[T].SVLQLRPGACGGASGGWAIGVLVSAGR.[A]	SVLQLRPGACGGASGGWAIGVLVSAGR	GACTTTTGGTAAATCACCTTTTGCCGTTTCCTTTGTCCCCGTGAAGCCCCCCCTGGCCGCCCCCTCCTCATTCTGGGCTGGCTGGCTGAGGGGGGGGGCAGCCTGAGGGCTGCGACGTGGCAGGTTTCTAGAATGTTCTATTGATGGCCGCAAGAGGGCGCTGGTGGCACTGCGGAATTTTGGGGGGCGGGGTGGGGAGGGAAGAGGAGGTGGCCTTTGTTCTCCTGCAGGAGGGGGTCGGGAGCGAGATGGGTTGCGGGACCATGGGTTCATTTACCTATGGGGAAATGTTAGTAGATACCTGGATTCACTAAGGTGCGCTTGCAGGACTTACAATAGGTCAGAGATGGCGTCATCTGCAGTGGCTGTGTGATTTAGGGTGTCATGGACGCAGATTAA…	TFGKSPFAVSFVPVKPPLAAPSSFWAGWLRGGAA*GLRRGRFLECSIDGRKRALVALRNFGGRGGEGRGGGLCSPAGGGRERDGLRDHGFIYLWGNVSRYLDSLRCACRTYNRSEMASSAVAV*FRVSWTQINLFSVICVFWGLRKVWLFEEELQKILIN*ASSIRVLRVDVAKGGQGFEEKGVNWVGGGRVVCLYFVI*LKTSKMSVLY*ELSL*ILIMLNWIY*WWVGAASCFYLSGVELWSGGSPLLQGLFGARRLLDACVCAASCLENGSGRGDGGA*RPLKMADVGSAPPPQA*NLLGALPPPTSV*L*QLRPGACGGASGGWAIGVLVSAGRAPPSGLYVQMVLGLPD*R*SCACAHS*HL*PVNQFICTPPIAVLPSHFSSYFSSHFYFPSS…	6.90162	4.37028e+06	error	133	44.6667
EMBOSS_242_2	2	EMBOSS_242	ENSMUSG00000097391	ENSMUST00000183144	Medium	[V].RDLEYLR.[A]	RDLEYLR	CAAACTCTGCTTTTTTGAAGGGCCCCCTGCACAAGCGATATGAGACTGCCTGCCTTGTGTGAGCCTTGGATGAGCCCTGCAGCTCCTTCGAGATGCTCCTTGGATATTCCTGATGGAGAAGACCAACCCCGAGGAAGCTTGGTCCTGCTTGCGATGAGCTTGCTGTGCTTTCACGGACACCCTTCGTTTCTTCTACCAGTTTTCAGTGCCAGGGTGCGCTTGAAAGGAGAGCTGATGCCAGGGCTATAGCCTTCCCCAGCCAGAGCATGTGGGCCAAACCCTTTCTGGATGGCTAGGCAGTGGGGAGAAGCCATGAGATGGTTGAGAAGTAGTCACAACTCCCCTGGGGACAGACTGGTTTTCAGGGTTACATCCATTCAAAAACACCCCCCGGAATTC…	SQL*GAQFWNHSFWGRRSPICRIYQQPSTLSRESLGIQFVIGRIFWKERGQ*TRGPGFPVRDL*EYLRAPCTSDMRLPALCEPWMSPAAPSRCSLDIPDGEDQPRGSLVLLAMSLLCFHGHPSFLLPVFSARVRLKGELMPGL*PSPARACGPNPFWMARQWGEAMRWLRSSHNSPGDRLVFRVTSIQKHPPEFRLVKDKLT*PCSFVLTEVLSLASPSSCGHH*GADTTPMGLPVLLFGSGRDLIPFLFVLVEITHKRDDAGGGQEAQLLPPG*LFPWWGPILDGISSRWMPASYKSPIRIGLREKCYQLLKVNTKWPIYVRGKPKAQEEMMDQKQQDMLVRKTCCMVDGPETAGLTDGHV*CLQIGNACALGFVYSGQPVVSAAIEGFLDSMAPSVR…	1.05564	5.58972e+07	error	40	13.6667
EMBOSS_105_2	2	EMBOSS_105	ENSMUSG00000098292	ENSMUST00000175753	Medium	[K].SYLWCSKLSFLDISSSDFFSALQNTSTKVSLFVFLSLM.[M]	SYLWCSKLSFLDISSSDFFSALQNTSTKVSLFVFLSLM	ACTTGGCTTCAACACAACTAGACTGACGAAGGCTGCTCACCACGGATGAAGACGAGGTAAGGCCGGCACCTCAGAAGTGAGGTCACGCAGACCTACTTGCACATGCCATGGGAGGAAGGAAGGTCCACACTGGTCCAGTGTGAGCTGCCTGACTCCATCCTAGCCAGTCCCTTGTACTGCTGCTGCTGCAGGAGGTGGGGGAGCCGGCACTGCTAGAAAGTCCTGTACGTGAGGAACTCTTTCATCTTCTTGGGGATTGGCAGTGCTAGGATTTGATACGTTGTCAGGAAACTTCGGAGGGCTTTCCCGAATAAGTGCTTCAGTGAGGACAGGACCCGGGGAGCTGTCCAGAACTGGACATGGCCATCTCTCGTCCCTGTGGCAATAATTCCACCGTGT…	LGFNTTRLTKAAHHG*RRGKAGTSEVRSRRPTCTCHGRKEGPHWSSVSCLTPS*PVPCTAAAAGGGGAGTARKSCT*GTLSSSWGLAVLGFDTLSGNFGGLSRISASVRTGPGELSRTGHGHLSSLWQ*FHRVGRMCSKDHWSSEQRQPEPSVPEPRS*AARHLPL*QDTSLRVRSTRTSGSSCGCHCHPWRVQAACDEVTSTFLRCRGPT*SHWCHTTL*QARRNQERNHRRQHCFSGLLVSGLVCRTACSTERPTSPQLQSTACYSQGRWSSSKPTADGRITPGSAYRAYSGPKCEASYPGMQRPKSNCRWARSSDLSRRLGGIFLIQKQEPCLYLPNFDLPIVETCGQDQARDIRRLEMVMCPGFPAGWRGPRAEGQPPHNQATLQRLLLQTAPSF…	4.81508	86113.8	error	46	15.6667
EMBOSS_251_1	1	EMBOSS_251	ENSMUSG00000115617	ENSMUST00000226648	Medium	[V].SAGLQCMAESRR.[A]	SAGLQCMAESRR	GGCAATGGCGGCAGACTTGGTAGTGTGTAAGTCACCCAAGGAGATTGATTTTAAAGGCATGAAGGGGGTCATGGAGAACAGCTGAGGCTTGGCACTGTCAGAGGCCAAGAGAGAAGCCAGTTTGAATCAGTCAGCTTGGAGAGGAGTTTGAGCCAGAACAGCTAAGTTGAACCAGCCAGGCAGACGTTGTTGGGGTTGGTCTGGTGCTGCTGTGTACTGTATCCCAAGGTCTGATTACCCCAAGATGAGCTAATTCCCACCTACCTACGCCAGCTTTTGTTGTGTAAACCTTGCCCCCACCCCCAAGCTATCCCTGATTGGTTAATAAAGATGCCTACAGCCTGGCCTGGGCAGAAGAGAAGTAGGTGAAGCTTCAGGAGGCAAAAATGACATTCAAGT…	GNGGRLGSV*VTQGD*F*RHEGGHGEQLRLGTVRGQERSQFESVSLERSLSQNS*VEPARQTLLGLVWCCCVLYPKV*LPQDELIPTYLRQLLLCKPCPHPQAIPDWLIKMPTAWPGQKRSR*SFRRQK*HSSQNHSVAGVG*TSRVVYFRASLNAAQSGKTS*EVSSVPCAQQSTPNLSEKENKLNTDQTWLHPSAL*VYVTPSVQTD*LRNKFMTMGPEEGPIQEVFSHTHCPTVSRLESTPTPAFWAERRQNSQACLTFQVSACL*AQTPPCPLQCSDFHVYTTACTHPYFHTT*AHTHIHRWEILKNVLSGIHHRRLFRHGLSQ*KVFNPSVAPTLSQVEFLRTKHRS*VDFLQLPRTVSQKQSYRSQKSRLCSS*SNNGCLQMEGPRILVESMK…	0.855458	38209194	error	5	1.66667
EMBOSS_187_3	3	EMBOSS_187	ENSMUSG00000097445	ENSMUST00000181462	Medium	[L].QNPLSSVQIK.[Y]	QNPLSSVQIK	GGTCGCCATGACCGGTCCCGCCCCGCTCCGCCAGTGGCCAGACCGGCGCGGGGAAGAACGAATGACAAGACGTAACACGCCTTTAGAAAGATGGCGGCGCGCAGGCGCGGGTTTCCCTTGGCGCTTTCCGGCCGCCTGCTGCGGAGAGAGCATCAAGGTTCCGCCCTACCCGTCAGGAACTGGCCAGCCCAGGTCTTGCCTTTCAGAATTCTCTAAGAACAGGACATCAGCATGAGTCCCTGGGATGAGTCATCAAAATAATATCTGGAGGAACATGAAGAGTGTCTGGAGGAAACTAAAAAGCAACAGCATGGGTTTATTTTAAAATATTTTTTCTTCTTACTCCTCTTCCTCCTCCTCCTTCTTTTCTTCCTTTTTTTTTTTTTTTTTTTTTTTTGA…	SP*PVPPRSASGQTGAGKNE*QDVTRL*KDGGAQARVSLGAFRPPAAERASRFRPTRQELASPGLAFQNSLRTGHQHESLG*VIKIISGGT*RVSGGN*KATAWVYFKIFFLLTPLPPPPSFLPFFFFFFFLRQGFSV*P*LSGNCSVDQAGLKLRGLPASSFQVLGLKVCAITPWPILF*LTYLFYVYEYTVVVFRHTRRSHYRWLRATIWLLRIELRTSGKATSALNC*AISPVPQF*FLTRV*EVFW*GNQILLKVRVKLDHSRFHG*TNVEHADVHVEQV*CTSLKQQKSNLLKLPAASTFNLILFSCWSNTAVLLSHRPISRKQ*EACWDYGAPEVK*GCSLSTFKEGVSPFL*SLTTMPANQSQQRQIL*CLS*QGAAESRQRRAGCCTALFS…	12.1532	252415	error	8	3.33333
EMBOSS_013_1	1	EMBOSS_013	ENSMUSG00000106943	ENSMUST00000132389	Medium	[R].QWKLLQ.[L]	QWKLLQ	GGGGGCAGCTCCGCCCCTCTCCCGGATGGCTGTATTAACGCAGCGCGCAGCGGCTCGGTCTTTCGGTCCCGGCCTTGGTGGTGAGTGTCCTCGTGGGAGGGTGTCAGGATGTCCCCGTGTCCCCTCGAGCTTTGCCCGCCCCGAGCTCAGCTGCTCCCGGCGGCCAGAACGGAGGGGTAGAGCAGTTCTCAGCGGCCCGCGGGGCGGGCGGCAGTGTCCAGCCCGGGGCTGCGCGAGACACAAAGTCCTCTGTGCCGTCCGACCCGGGCACCCTGACCACCGCCCTTTCCCTCTGCAGGCCGATCCACCCGAGCCGGTCCCCACTGCCCAGCCGTGCTGCTGCCTCGGACACAAGCGCAGGTACGTCCCGGCATTGATCGGAGGCAGGCCCTGGCCACG…	GGSSAPLPDGCINAARSGSVFRSRPWW*VSSWEGVRMSPCPLELCPPRAQLLPAARTEG*SSSQRPAGRAAVSSPGLRETQSPLCRPTRAP*PPPFPSAGRSTRAGPHCPAVLLPRTQAQVRPGIDRRQALATWPRRRRFQACLC*AAPGLPSRPFLCPFKVVAVL*EANTEG*RNSP*NPERKTTPPLWILSGVTNEPKASFKT*MCAF*VLAIAR**YRILKKRKRSLPGLIWLEEKVQKTRIHLLF*K*DFRSAGKDIVEYVPLM*NIFILS*VENYKKPVTEWLQGEVLLHVVTRFACIPL*D*YRS*NR*SEGHVSFLEWPCN*LP*R*FAKDFNQCTRILPHPFFMSHCPRIRSAWL*HARRFKDAKISC*IIRMYLDFVRTSSLLVTSHVLA…	10.4918	5222773	549	26	8.66667
EMBOSS_112_1	1	EMBOSS_112	ENSMUSG00000097772	ENSMUST00000180779	Medium	[L].SLLQLCQVDTK.[L]	SLLQLCQVDTK	TCCATTCGGTCCTCCTTTTGTTAACGCTCTGGCATCATGTCTACGCCAGCTCCCGCGCAATCCGGCGCCATCGCGCTTTGGGCGAGCATGGCCATGGGGAGTAGAGAGGTGGAAACCGAGCTGACGCCTGCCTGACCCTGGCGATGGTGGCGCGCGCCGGGAAGGACTGATTGGAGAATGGCGCCAAATGGGTCACGGATGGCGAGGGGGCACAGGAGCTCTCGATGTGACCTGGCGCTGTGGATGTGATGCACAGCAGCTTGAGTGGGACTGCTCCGCTGTCCTCATGAGAGAACGCTTTTTCTGAAGATGGGAGGTGGCTAATGAAAGAAGGAATTGTGTTCTCGGTGATGCCTGGAAGAGATGCGTGACGTTGGAAGATGATTACGAAATACAGGA…	SIRSSFC*RSGIMSTPAPAQSGAIALWASMAMGSREVETELTPA*PWRWWRAPGRTDWRMAPNGSRMARGHRSSRCDLALWM*CTAA*VGLLRCPHERTLFLKMGGG**KKELCSR*CLEEMRDVGR*LRNTGKVESFVLYILNILSDTVWERL*SKDWNPKGFGEILITYFRGGRELLFRQSLCPCWCGGQRTTWKFLQPRPPVLTTGLCVCGCFVCTVCIHGA*EGCKGASDPLPLQLESEAAMCVL*IGPQSS*LLSSLS*SGFLFLDKHHDQEASWEGKGLFGLHFSTLLFITKGSQDWNSSRSESRS*CRDHGGILLTGLLSLLSYRTKTTSPEMVPPTRGLSPLITD*ENALQLDLMEAFPQLKLLHQ*PLIGSLYGAKPQPLCMTPSVLGHQ…	3.44038	2.31379e+07	error	37	12.3333
EMBOSS_070_1	1	EMBOSS_070	ENSMUSG00000092341	ENSMUST00000172812	Medium	[K].VGDIKSEGNYLSH.[K]	VGDIKSEGNYLSH	CAGGCATTCAGGCAGCGAGAGCAGAGCAGCGTAGAGCAGCACAGCTGAGCTCGTGAGGCAGGAGACTCAGCCCGAGGAAATCGCAGATAAGTTTTTAATTAAAAAGATTGAGCAGTAAAAAGAATTAGAACTCTAAACTTAAGCTAATAGAGTAGCTTATCGAAATATTACTTAGTCTTAATAATCTAAGAAGATCTTAAGAGATAACATGAAGGCTTATTTAAACAGTTTGAAAAAGGAAATGAGGAGAAAAGTATTTGTACTGTATAATGGAGGCTGACCAGAGCAGTTTAGGAGATTGTAAAGGGAGGTTTTGTGAAGTTCTAAAAGGTTCTAGTTTGAAGGTCGGCCTTGTAGATTAAAACGAAGGTTACCTAAATAGAATCTAAGTGGCATTTA…	QAFRQREQSSVEQHS*AREAGDSARGNRR*VFN*KD*AVKRIRTLNLS**SSLSKYYLVLII*EDLKR*HEGLFKQFEKGNEEKSICTV*WRLTRAV*EIVKGGFVKF*KVLV*RSAL*IKTKVT*IESKWHLKQ*SCRE*FENEV*F*KIEKSRLS*RPL*KSFDWRMYV*RHELETGKMEVLG*PGDGGARL*S*HLGGRGRRISEFEASLVYRVSSRTARATQRNPVLKKQKG*ASIWRKKIRKWK*KTKKTYRKVKKKLLEKIGK*KTKHL*KTEKVLKGTGSRKPKNRR*KEAR*KNKMEVKTTLDASIQDRQRR*D*GQKVG*DIKSEGNYL*SHKFKFLMERAV*KSL*TATYKIEASNQSY*D*SKKLRQNAFEELEEY*KP*LVA*FCLM…	45.2814	4.30487e+06	error	209	69.6667
EMBOSS_194_3	3	EMBOSS_194	ENSMUSG00000097379	ENSMUST00000181390	Medium	[V].SGDPKANSPMKPK.[C]	SGDPKANSPMKPK	AGACAGGGTTTGTGTAATCTTGGCTCTCCTGGAACTCACTCTCCAGACCAGGATGACCTCAAACTCCAATCTACCTGCTGATTGCCACCATGCCTGGCTATGTTTTTATTTACTTACCAGACAGGGTCTTTCTACATAGCTCTGGCTGTCCTCAAAGTGTGTAGACCAGGCTGCTTCCTGAGTGCTTGGAATTAAAGGAAGGCACCACCACCCCGGCTCTGGGCCAATGAGAACGGCACCAAAAGACCCGCTGCTGCTCGTCTACCCATTACTGATTCATCTCCACTCCAGAAGTCTAAAGAAACAGAAGACGATCAGTTTCACTCCAATGGTCAAATAACTGTGTACTGACTGTCTCAGGTGATCCTAAAGCCAACTCACCAATGTAGTAAAAGCCCA…	TGFV*SWLSWNSLSRPG*PQTPIYLLIATMPGYVFIYLPDRVFLHSSGCPQSV*TRLLPECLELKEGTTTPALGQ*ERHQKTRCCSSTHY*FISTPEV*RNRRRSVSLQWSNNCVLTVSGDPKANSPM**KPKCDRLKEKRENYRLH*VVLLFITCKSRI*GYRLIYNSQSSRQNLED*NHNT*EEQPLPPECWD*RRAPPCLAQNFIF*CITCFTDFNFIFRKSSKFS*TSLEGI*KNYIFENFTVIALPNPKCF*TAPEL**KLLLAIFYFILLCVHASLCVHVCAEARGQHI*SSSATPHLVRLRQGLSLTEPGDSQQAPGILLSSLVCGELTDIPHHV*LAFYVCIWDTMSFWIALI*YYNVSFYPKQNILIH**HLNFNTFRKMK*FILSLLCV…	1.54922	1.78695e+06	error	53	18.3333
EMBOSS_389_2	2	EMBOSS_389	ENSMUSG00000112964	ENSMUST00000222130	Medium	[S].SVSFNNLLIRLLLCQEIVEEAPEVYVYIVK.[E]	SVSFNNLLIRLLLCQEIVEEAPEVYVYIVK	GGAAGTTTGTTTTTGCTCTACAGGATTGAACCGTCTCTGTGTCTTGCTTTGAGCGCTGCTGTTGGGTGCTGTGAGTGGACCTCAAGTAAGCTCCGTTTTTGAAACATGGATGCAGTGACTTATGATGATGTGCGTGTGAACTTCACTGAGGAAGAGTGGGATTTGCTGGATCCTTCCCAGAAAAGTCTCTATGAAGAGGTGATGCTGGAGACCTACCAGAACATCACTGCTATAGGCTACAATTGGGAAGACCATCATATTGAAGAACATTGTCAAAGTTCTAGAAGACATGAAAGGAATGAAAGAAGTCGTATTGGAGAGAAACCCTATGAATGTTATCAATGTGGTAAAGCCTTTGCACGTCACAATCATCTCCAAATACATAAAAGAATACATACT…	CVPHLYCSQMAASEHLNLK**AVVGPHVNTGH*PPFFVEDQKELSTAELSPCPMLLIYDPHLYYWYFHLSICNCLNIHSLL*NLFPFKLGHFRFLPDDYRLYTVVNV*FFVGTSVKTSEFFLCFLLA*FHFGGE*RS*YVPLLSWNFLLSPR*HLTK*HTPACASGIKSMSKHIQLAYHFCTL*LVIQCL*CVLNNVDLFASLLPPLYQLQFVLQGYILFKAFRSDTGEAHSSVSF*NNLLIRL*LLCQEIVEEAPEVYVYIVKEAYIYLQ*CQDYALCCPNLWDILGCSDL**CACELH*GRVGFAGSFPEKSL*RGDAGDLPEHHCYRLQLGRPSY*RTLSKF*KT*KE*KKSYWRETL*MLSMW*SLCTSQSSPNT*KNTYWRETL*M*SMW*SLC…	4.78988	168082	error	106	35.6667
EMBOSS_074_3	3	EMBOSS_074	ENSMUSG00000092274	ENSMUST00000173672	Medium	[W].NAVGQGATNGLR.[C]	NAVGQGATNGLR	GAGTTAGTGACAAGGAGGGCTCGCTCTTGGGGCTAGTGGTGGGGAGGCAGTGGCCAGTTCAGGGCTCAGATGAGAGAGGTGGCAGAATTAGAGGCAGCCACTAGGATGGGGGTGCGAGGAGAAGCGGGGCTAAGTATAAAGGAGACTAGATTTTGGGACAGTGGACGTGTGGAAGGCAGCTTCCAAAGCGCCTTTAACAATCCACAAAGAACCAGCAGCTTTCAAGACCAGGCTATCCCTGCTGTCTGCTGGCACTTGACGTCCAGGAGGGCACAAGTTTCACAGGCCTACATGGGGGCAGTGTCCTAACTTGAGTGGCAGAGCAGCAGTTGATGGAGACGGGTGGACTGGGGGCCCTTGAAGGCCCCGGAAATCATAGAGGACAGGCAGTGGGGCAGG…	ELVTRRARSWG*WWGGSGQFRAQMREVAELEAATRMGVRGEAGLSIKETRFWDSGRVEGSFQSAFNNPQRTSSFQDQAIPAVCWHLTSRRAQVSQAYMGAVS*LEWQSSS*WRRVDWGPLKAPEIIEDRQWGRTRCVVEVAFDLDKTSRPLFFQIRGCEPTWG*GLVLWKVDLASLGGQLWPRVVCNLGVACLHPLRGARGGRRRLQRQVVFTVRSARRGPWRLKAQVLGPH*SQLYFSDSSALSGLCLGSVLPLLWSHSSLLLPLTLRLRGHLKPCPWVVR*ACGGCRVGAGVLGTAFW*RWRTP*LGGEGWC*FTEGGT*VWTLGWAHSHVSGHPNASWTWFITIVFTMASRWHQEIWSPCQCES*QCRRAHPGGDSGLG*RLHSEFQRLRKRVPAL…	3.29151	17380612	error	70	24
EMBOSS_368_1	1	EMBOSS_368	ENSMUSG00000097908	ENSMUST00000199264	Medium	[K].DMRGTQLTVQERQPLLSAGVAEG.[T]	DMRGTQLTVQERQPLLSAGVAEG	GTCTTGCTCTGCCTCCTCCCACACCAGAAGTGAGCATCAGGTGGTGGCGAGCGCGTAGACAGGGTGAAAGGTGTGAGGGTTAGCGACAGATCTGCGTATTCACCTTGCTGGTCACCGGCCACCACCACCTCGGCGCCAATGAATTTTCTGTCGCGAGCCCCGCTAACGGCTTGCCGCTGAAAACTCTGGGAAATGTAGTTAGGCGCGAGCAAGCTGTCGTTAGTTGCAGGTCTGAGGCGGGAACCGGGGCTCCTCATGTGTTCGCGGCTCGGTTCAGCCTTCCACGAGCTCCTGAAGTTCTGCCATTCCCCGTGGTCTGCAGTTCAGGAAGCTTCTGGAACATGCGGCGCCTCTGCCATGGAAACACGATCCGCGTCGTCAGCTTCAGATGTGATCTTG…	IRWWRARRQGERCEG*RQICVFTLLVTGHHHLGANEFSVASPANGLPLKTLGNVVRREQAVVSCRSEAGTGAPHVFAARFSLPRAPEVLPFPVVCSSGSFWNMRRLCHGNTIRVVSFRCDLGTLSSPWQLSES*SCEGT*SSPLRKPRAPLPKNIAVCSFPFRWPQDPSRKEEGRTLKDMRGTQLTVQERQPLLSAGV*AEGTQGTNQRGPVGNRQSGFPAPE*ICGQPGVEGSWKPPE*WFVASINRLTLQQPSSFLDNI*KCLLHS	6.57066	2.28648e+06	error	139	46.3333
EMBOSS_142_3	3	EMBOSS_142	ENSMUSG00000097876	ENSMUST00000180999	Medium	[T].LLKEMGHRAK.[Q]	LLKEMGHRAK	GGTCGAGGGGCGGAGCCTCGATGAGCTTTGAGGATTTTACTGTTTTGTTTTGTGCTGTGCTGTAATGTAGACAGATTTTATAAAAATCATCCCATGGTCGGAAGCTGTTCCGGCTCTCTCAGCACAGTGACTAGTCTGAGCAAGCTGCGAAACAAAGCAGACGGCGTCCGTCTTTCAGAGAATTATCATTAACGACTCTGGTGTGAAATTTGCTACAGCGTAACTGAAATCATGCACCAGTGTAGAAGCCACAGATACCAGGAAGATGCTCACAGATGACACTGTTCCAGGAGCGGAGCACCTCAGTGCTCTCCGCCAACACCCACTCACCAAAAGCCAGAAGGAGCCTGCACTTAATGGGCTCTATTAATTCAGGGAAAGTGATGCTTGATGTCCGGC…	SRGGASMSFEDFTVLFCAVL*CRQIL*KSSHGRKLFRLSQHSD*SEQAAKQSRRRPSFRELSLTTLV*NLLQRN*NHAPV*KPQIPGRCSQMTLFQERSTSVLSANTHSPKARRSLHLMGSINSGKVMLDVRLVDPGLDVDNLFPIII*HGRAVDFIWEGREGLRPSAPS*HVTLLSM*HFLACGHFLACEHFLACEHFLACGHFLACEHFLPCEHFLACGHFLACEHFLACGHFLACEHFLACGHFLACEHFLACGHFLACEHFLACEHFLACGHFLACEHFLACGHFLACGHFLACGHFLACEHFLACGHFLACGHFLACGHFLAYGHFLACDTS*HVDTS*HVDTS*HVDTLLSNHKLLVVFLK*GMTVRNKRKHFKSCWFCYRDTGNNPYSKQVH…	1.18069	1.01773e+06	523	21	7.66667
EMBOSS_144_3	3	EMBOSS_144	ENSMUSG00000097578	ENSMUST00000181384	Medium	[R].ETLSPNKMNQSILNAMAHK.[K]	ETLSPNKMNQSILNAMAHK	AAAAAGAGGGACTGAGATGTAGCTCAGTTAGTAGAATGCTTAATAGCATGCATGAAACCCTGGGTTTAATCCCAAACATTATATAAATTAGTCATGGTGGTACACCCTGTAATCCAGGCACTTGGGAAACAGAGGAAGGGGAACAGAAGTTTACAGTAACCCTCAATCTATAAAGTAATATTTGAGATCAGACTGGGTAAAATTAGATCCTGTCTCAAAAAAGTAAACAAGTAAAGAGTTGAAAGAAGAGCAATTTCATGGCTACATCATTGTGAAGATTACACAAGATGATACAGGTAAGACACTTAAAAAGTGTTTGGGCCTGCCAAGCATGGTAGGACTGGGACCAGTCATTATTGTTATTAGTTTAAATATTTTAAACAGCACCCTTTCCATAAG…	KEGLRCSSVSRMLNSMHETLGLIPNII*ISHGGTPCNPGTWETEEGEQKFTVTLNL*SNI*DQTG*N*ILSQKSKQVKS*KKSNFMATSL*RLHKMIQVRHLKSVWACQAW*DWDQSLLLLV*IF*TAPFP*GERERRDAEPNCRKYKFWLSYISLFISQTGKL*LL*SMVTLRIR*EIPI*IKYRAGHGGACLES*HLWGRGREISASSRPVWSI*QVPEQLRLQRETLSPNK*MNQSILNAMAHKKYSAHLSCALSKELFPTL*ILSPCSKLYVQPNLSCFTSVG*IHSP*WPLGFLEVSH*SQPKENLACSL*HVTIPSYLSLPQPSFSI*LDDATTQPFHFYREVWDSL*ALSLSHTPLQLLLTALRSFNSFSSKIPP*INY*GLNHNTPSYPDS…	0.862102	2.12938e+06	error	17	6.33333
EMBOSS_187_1	1	EMBOSS_187	ENSMUSG00000097445	ENSMUST00000181462	Medium	[K].CVPSPPGQFFFNLLIYFMYMSTLSLSSDTPEDPITDGEP.[P]	CVPSPPGQFFFNLLIYFMYMSTLSLSSDTPEDPITDGEP	GGTCGCCATGACCGGTCCCGCCCCGCTCCGCCAGTGGCCAGACCGGCGCGGGGAAGAACGAATGACAAGACGTAACACGCCTTTAGAAAGATGGCGGCGCGCAGGCGCGGGTTTCCCTTGGCGCTTTCCGGCCGCCTGCTGCGGAGAGAGCATCAAGGTTCCGCCCTACCCGTCAGGAACTGGCCAGCCCAGGTCTTGCCTTTCAGAATTCTCTAAGAACAGGACATCAGCATGAGTCCCTGGGATGAGTCATCAAAATAATATCTGGAGGAACATGAAGAGTGTCTGGAGGAAACTAAAAAGCAACAGCATGGGTTTATTTTAAAATATTTTTTCTTCTTACTCCTCTTCCTCCTCCTCCTTCTTTTCTTCCTTTTTTTTTTTTTTTTTTTTTTTTGA…	GRHDRSRPAPPVARPARGRTNDKT*HAFRKMAARRRGFPLALSGRLLRREHQGSALPVRNWPAQVLPFRIL*EQDISMSPWDESSK*YLEEHEECLEETKKQQHGFILKYFFFLLLFLLLLLFFLFFFFFFF*DRVSLCSPDCLEIAL*TRLASNSEVYLPLLSKYWD*KCVPSPPGQFFFNLLIYFMYMSTLSLSSDTPEDPITDG*EPPYGC*ELNSGPLEKQPVL*TAKPSHQFPNSSS*PGYERSSGRGIKFY*R*E*N*TIVGFMVEQMLNMLMFTLNKFDVHL*NNKNQTY*NSPQHLHLT*YCFPVGVTQPYCCPTDL*AGSSEKLAGIMELLKLNRAVPLVLSRKE*APFSSL*PQCLQTNHSKDKYSDV*ANKVLPRAGREELAAAQHFS…	12.1532	1.04439e+06	error	8	2.66667
EMBOSS_072_3	3	EMBOSS_072	ENSMUSG00000097073	ENSMUST00000180723	Medium	[K].GKAVLGNDLTSFCSLFCLFPCLLM.[G]	GKAVLGNDLTSFCSLFCLFPCLLM	GCTTTCTGGTTCCTTAGTCCCAGTTTGGGGACCATGGCTCATCATTCTTAACATCCTCGAAGCAGTTGCAAAAAGATAAAAAGATGAAGGGGAGCCCAAAGCTTCCGACAGAATTCATAACAGAAAATAACTTGATTAAAGCCTGACTCTTTTAAAAGTTCTTTCTCATAGCATGTCATGGTACCTCTTTCTGCAATGAAACCTGACCAGTGAGATGCCAGCCTGCCTGTGAAGATCCTGCAGCAGAAGTGCATGACCAGTGACACTAGACTTCTTGCAAATGAACACTAGATATGGTAACATCCAGAAAAGGCAGAGACAAGAAAATTCACAGTCTGAGTACTGGGGTGTTTGAGATGGGGTCTATCTACATGTCTCTAGCTGTCCCTATGTAGTGAA…	FLVP*SQFGDHGSSFLTSSKQLQKDKKMKGSPKLPTEFITENNLIKA*LF*KFFLIACHGTSFCNET*PVRCQPACEDPAAEVHDQ*H*TSCK*TLDMVTSRKGRDKKIHSLSTGVFEMGSIYMSLAVPM**TGQHLV*PAELIPVCFFVGCM*MDCF*QSIRPCSLL*QSWGHG*AGDRHTCTD*AE*MQS*L*SSRSLFL*L*NWL*AISIFI*QWLLGSAAISIQ*QIFLQVLFLMLKKISLL*FILFDNLGILGPSAVPVQFWMQLGIQEFQWSC*HRGPYRSNSCTLSIARVRGSL*N*PRWFHSPQTNLDCSTWPFLFLMLMHVLLLQ*IHDH*KTMISHT*HQGLHSRCRLSPLHPLCSYKILFDPRGTLVVSCPGLDSACLYLASEEVLFR…	2.9349	5.47594e+07	974	34	12
EMBOSS_101_2	2	EMBOSS_101	ENSMUSG00000097722	ENSMUST00000180725	Medium	[I].KTGIVFAATTAGCPLVSKFCTVR.[K]	KTGIVFAATTAGCPLVSKFCTVR	CCAGTGCTCAGGAATCTGCTCTTGTGATGACTGCAGAGGCAGCTCCCGTGAGATGGAGCTTTGGGGAAGGGAGGAGTGAAGAGCAGCAATACACAGCCTCCTCCTTATCCTCAGGGCACCTCAAAACTGTATAGCACGGCACGTTGTGAGAGCCGTGAGAGTCTGTAATGGTTAGCAGTACGCAGTGTGATGCGCTGGATCAAGGAAGGCTTCATGTGGACAACTAAGGAAATCAGAGCCTGGAGCTGCTGTGACCTGGCCTGCCTCCCCTAGACGAGTCTGGATTCCCACCGACACCGGCACGCCCTCAGCCTCCAGCCCTCATGCTGTTCCTGCAGCCCAGGCCTGGTTTTTATACTGTCCCAGGCCGAGTCCCGGCTCTAGGACCCACTCGCTGGG…	QCSGICSCDDCRGSSREMELWGREE*RAAIHSLLLILRAPQNCIARHVVRAVRVCNG*QYAV*CAGSRKASCGQLRKSEPGAAVTWPASPRRVWIPTDTGTPSASSPHAVPAAQAWFLYCPRPSPGSRTHSLGGTSAQASS*ALSGYRAWQVHCARQTRGEAIPLLSP*WLPLSRPLRPHAVHCGGSVSAAYLGGRRHLGHPVLLSVHLC*PAWEAIISSPVSSPKPRMAM*HTVCLGATYRQKPGREL*QDVCFPDEDSACGSSCHTGTSQRQ*IKTGIVFAATTAGC*PLVSKFCTVRKALWTSRTRCSPGRA*RCA**RW*DPGRRCRRRSWCRSRCACSSSSCREGGRKRLDE*HPFCKD*SCICVWGESLPGAWTAVHLGLP*AMSL*ISYPSS…	1.91728	27060388	error	27	9.33333
EMBOSS_096_2	2	EMBOSS_096	ENSMUSG00000097284	ENSMUST00000180465	Medium	[K].SIPTCVLQTSAMR.[Y]	SIPTCVLQTSAMR	ACCATAGAGTTTGGCGAGGCGTACTAGAGGGGCTACCTATTGCACCTCCCGGGTGGTTCGGGCTTAAGGTTAGCCAGGCTGAGGCTATGGGAGCTGCAGGTGGATACACAACCTTGGATCTGGTGTAGCTCTCCTTAGCCCAGAGACTTTTAAGTTAAACAAACGCCCAAGATACCTTTCTTTCACTAGAATATCAGCCGATTAACAAAAATGGTCCCAAAGCTCCGTGACACTGGACCCATTTTTAGGGCTAGAGATAGTCTTCTTAATCACTTTCTTCCCGCTCTTTAGCTCTGGGATGTCCTTTTTCTCCTGAAAATTCATATTCTGCCAGGTCCTTTAAAAAAAAAAATCGTTCCAACTCTCATCTGAAGCTCCGGCTGCCTTGGCTGCCAGTTT…	P*SLARRTRGATYCTSRVVRA*G*PG*GYGSCRWIHNLGSGVALLSPETFKLNKRPRYLSFTRISAD*QKWSQSSVTLDPFLGLEIVFLITFFPLFSSGMSFFS*KFIFCQVL*KKKSFQLSSEAPAALAASLAFVSDLSASSKERADSDASVLQ*QRYCRKYFMD*ERSIEPWEEWKSQRTGMSAVKCFLRDRIR*LHS*ALCSCDSLHKFKSSFQQASSRRQAQLRSGLKI*TKGVSCYLKDLNERSHGLSWYL*SPSTTHSVYAPPQALQQRFGSLPGEVIHTFIPETCQRLQIASLSATDTSSTTGSPGSYGASGRAARTTVWIS*KASCARSDSSFWVSGKRAGVTHRREESCVSRIQMDLLNIVLPSWWQEGPDAKTYPSPWKEYLYMPILLN…	0.868286	7.27297e+06	error	87	29.3333
EMBOSS_124_1	1	EMBOSS_124	ENSMUSG00000097526	ENSMUST00000180407	Medium	[R].QAYVALQNNSRPVFTFLWDEHPDPPIVSHLPQNLGTL.[V]	QAYVALQNNSRPVFTFLWDEHPDPPIVSHLPQNLGTL	AACTGGATGAGAAAAATGTCAGGGACGCAAGACACCCACCTGGGTTCTAGTGACAGCATCAAAGACAAAGAAATGACACTCCAGGAAAGAAGCTTAACTAATGGCTCTTGTCCTAGCTGACACCCCTAGAGGTTGTGTCCTTCTTAGGCAAGAGGATCGAACCAGGCCTATGAAGACCCCAAAGCCTGAGAATCCTGGCTCCTGACGACCTCCAGGCCACTGTGTCTTCGGGTCTGGACTGCAGAAGGGTTCTGTTCTACTCTCGGAACTCGAAGATCCTGGCCTCACCGTCCCTTCCCTAGCCCGAGCTCGGGGTGTGCAGAGACCCGCGAAAACCCGGCAGGTCTCCGGCGCGCTCGCCCGGGAGCAGGATCAGAACGCGCGTGCGCGCCGGGAGCC…	NWMRKMSGTQDTHLGSSDSIKDKEMTLQERSLTNGSCPS*HP*RLCPS*ARGSNQAYEDPKA*ESWLLTTSRPLCLRVWTAEGFCSTLGTRRSWPHRPFPSPSSGCAETRENPAGLRRARPGAGSERACAPGAPPPPFNRAAGK*PLTAPLLAAPPSHHLRDARCRSWVLRTHSPALRESSEASQSLRP*GAGSQPFPPLG*ERPVCACAGGGGAGRGGAGRAEPLDSRREREDWIKKGNPKGLFYVSRASALK*KTKTLWVFY*IIIRIKIELRENLQTYFPFQSSGLFQSLKWLVRKDVFYLGGSGEFDVWGGVLGCLSSYRHMF*SWQGIYRKLRIERSEINIPCSFRVTCAPVETMLFYEQIQDRAPKEKKKIISELSV*IEEIDIWVMRES*QK…	0.855458	578117	error	7	2.33333
EMBOSS_097_1	1	EMBOSS_097	ENSMUSG00000097033	ENSMUST00000180656	Medium	[P].KQLCSYTQHLK.[M]	KQLCSYTQHLK	AAAACTTTGGACTTTATTATGTCTAGTTGAAACCCATGAAAACAGTTATGTTCTTATACACAACATCTGAAAATGTAACTATAAAACCGAGTTTTCTCTTATGGATAGTGTAACAGAACAGCATACATAAAAAGGAAATGTCAAGTAGGAGCCCCATCACATTTCACATTTCAGCACGGTTGTCTTCCTGCCTGTTCCCCTGGAGAAAGAAGGGGTCACCGAGGGTCTAAGAGCTGCAGGGACAGCTGAGGCACAGCTCTGCTCCCCCAGCCCGAGTCCCACAAGATCAAAATGATGGAAACAGGAGGTAGGGGCCAGGCCAGTTCATGTGGCTGGAAGGCAGCAGTGGCAGGCACAGCTTCTCACTGGCTCAGTCTGGTTATTACAAGGGTATGGGAT…	KTLDFIMSS*NP*KQLCSYTQHLKM*L*NRVFSYG*CNRTAYIKRKCQVGAPSHFTFQHGCLPACSPGERRGHRGSKSCRDS*GTALLPQPESHKIKMMETGGRGQASSCGWKAAVAGTASHWLSLVITRVWDLHLGRWVIFPPNAPILGHVFWKHFRKFLNQ*AFKFLKTKIAVSKKIQVIHNTPHPRNPESNRDSHPKGWNQVTYLPQVNTQSQLLNVSN*LVKGTSPL*KGTVSLKQFLPFGLRRKHPTEHLQPGAPTAVERPSAGSTHPRILALTEAITHRNYTGHKCKHLPSFL*PWRGIIHFSSHLSLTVVLSSQKKSLLSGSQSQCHKDTCNPTATTEKL*LVPNGGMQASEVCLETVTGLR*EMAARAASAQGKLTT*APSMGNALQHGPR…	7.93733	3.63616e+06	14	19	6.33333
EMBOSS_390_1	1	EMBOSS_390	ENSMUSG00000103400	ENSMUST00000195518	Medium	[R].SARLGSALLGGP.[A]	SARLGSALLGGP	GGAAAGGCGTCCTACGGCCGGCTAGGCAGCCGCCCCCTTGGATGCTGTGGTTGTAAGGTGGGTGACCGACCGACTTCACTTGGGGTCTCTGTGCCTTCCGAACCCGCTTTCACAGCTCTTCTAGCTGGCCCCTGAGCAACGCGGGCCTCCGCCTCCGGGAAGCCCTCCGGGCCCCCCCACCCCGCCCCGGCGCGCCCCCCGCTCTACCGACTCCGGGGCGCCTAGGGCGCTGCTCCCGCCCCCACGCGGGTATCACCGGTGTCGGGACGCCCAGGAGAAAGTCCTCCAGCGCCTCGAGTCCCGGCGGAGCCCGCACGGGAGCCGTGGCGGCCGCGAGACGCCTACGGCCTCCGGGAGGTGAAGAGAGTCCAGGGACTACGGCAGCCCCGAGCTTGGGGC…	GKASYGRLGSRPLGCCGCKVGDRPTSLGVSVPSEPAFTALLAGP*ATRASASGKPSGPPHPAPARPPLYRLRGA*GAAPAPTRVSPVSGRPGESPPAPRVPAEPAREPWRPRDAYGLREVKRVQGLRQPRAWGTPTDRPGGWSPRLLLFHVVPQRLAQVLLGCLQLAHKGRHCSARLSARP*TARPTATSNRKINAAEGLRAGRWRLDSTRFHSARLGSVRLGSARFGSARLGSAPLGSARLRSARLGSALLGGPAPIR*GDVAWVWFLAPPSRSWESTQPNSLRQLPPLGSRDPLPLVGACPTYARLPARGGPRGANLTAPPALRPGPALTAGQLFPEGRAQVPECMQYLIYPLVLIFLPSAHHLL*HLVGRSRFLPPATKTRAA*RQDLCYSSSEHS…	2.42277	3611841	244	42	14
EMBOSS_115_3	3	EMBOSS_115	ENSMUSG00000085438	ENSMUST00000153581	Medium	[I].FIINNLLMRANNNK.[I]	FIINNLLMRANNNK	TTTCGCGCCTCCGCCCCTGGGTTGGCGGACAGGGGAAGGAGCGAAGATGGCGGAGTGAGGCGTGCCCCGGGCAGCTGGCCTGCGGGCCCGGGGCAGGCCTCCCGTGAGAAGCGGAGTACTTGTGCTGGACCGTGTGAGGAACCATATCACACAAGATGAATATTTTCCTGACCTTAGGTGCTTTTATATTCAGCTCAACATTCTGAACTCAGGACTTGGCACGAATTCCTATGTGGACTGCTCAGTGAGGCGTCCTGGTTCTTCCATCCTGTTACTTTCCCCAGTGAGATGCAGATGTCTTTCGACAGATTACCTCCATGGTTTAGGATGCAGAGACTGCCTTTCTTTTACGTCAGACTCAACACAGGAAAGCCGTGAGGATGCAGCCGTCCTGTTGAC…	LRPWVGGQGKERRWRSEACPGQLACGPGAGLP*EAEYLCWTV*GTISHKMNIFLTLGAFIFSSTF*TQDLARK*IEIIIPSPVVAA*KAP*KRHTKLLRATEDEDKNEYKPATMAHLYAQLLGPGELRNSYVDCSVRRPGSSILLLSPVRCRCLSTDYLHGLGCRDCLSFTSDSTQESREDAAVLLTSARKQTMDLGLLQLLNWKDGVCK*KEDAEFETSA*VLWRELFSF*KIQTRRLNKYQVWVTSGFFFNVFQF*HYYKHS*PQ*VPNI*YNLK*KKCYLNSGSLFDSFPGQKQDTIKAETRFDFVWE*NHYSFMGINLHF*TRFFSWRRNLLFIRRLWTV**S*MFCFAVLVLLRKAQLGLWLVQNGRKHRLGQCSP*TASVWEAKAGRADVQGQ…	3.34809	6.02757e+06	731	47	16.3333
EMBOSS_006_1	1	EMBOSS_006	ENSMUSG00000021268	ENSMUST00000143272	Medium	[K].KKGNNTLTNR.[M]	KKGNNTLTNR	GACTTTTGGTAAATCACCTTTTGCCGTTTCCTTTGTCCCCGTGAAGCCCCCCCTGGCCGCCCCCTCCTCATTCTGGGCTGGCTGGCTGAGGGGGGGGGCAGCCTGAGGGCTGCGACGTGGCAGGTTTCTAGAATGTTCTATTGATGGCCGCAAGAGGGCGCTGGTGGCACTGCGGAATTTTGGGGGGCGGGGTGGGGAGGGAAGAGGAGGTGGCCTTTGTTCTCCTGCAGGAGGGGGTCGGGAGCGAGATGGGTTGCGGGACCATGGGTTCATTTACCTATGGGGAAATGTTAGTAGATACCTGGATTCACTAAGGTGCGCTTGCAGGACTTACAATAGGTCAGAGATGGCGTCATCTGCAGTGGCTGTGTGATTTAGGGTGTCATGGACGCAGATTAA…	DFW*ITFCRFLCPREAPPGRPLLILGWLAEGGGSLRAATWQVSRMFY*WPQEGAGGTAEFWGAGWGGKRRWPLFSCRRGSGARWVAGPWVHLPMGKC**IPGFTKVRLQDLQ*VRDGVICSGCVI*GVMDAD*FIFSDLCFLGS*KGVAF*GRIAKNIN*LGVIHKGLES*RGKGGARF*GEGC*LGGGRQGGLPLFCHIAEDLKNECSVLRIESLNFNYA*LDLLMVGGGSVLLLLIRSRIVVWGQPLTAGSLWCKAAPGCLCVCCVMSGKWLRQRRWGCIATLKDG*CGLCPPPPSLKPVGRPPPSYVSLALAAASWRLWGCLRWLGYWSLSECGPRAP*RSLCANGSWPARLALELRMRTQLTLVTCQSIHLYPSHCCPPLPFLLLLLLPFLLSLF…	6.90162	1.02577e+07	1463	133	44.3333
EMBOSS_131_2	2	EMBOSS_131	ENSMUSG00000097234	ENSMUST00000181328	Medium	[S].TRTKNTLK.[K]	TRTKNTLK	GCTGCAGAATATATAGGACTTCATAATTCACTCAGAAATCCCATCATTGATACTTTTCCTATGATATAACTATTGTTTTGAATATATCCTGCTTCAAATGAAAAATAGAGAATGTATCAATGTCAAGAAATTCAAAAGGTAAGTTAGCTAACATTTCAAAAATCCCAAGTCCTTACAGTCTACCTTACTCTACCCACACTACTAGAACATTCTGAACTACAACACAACTGCTTTTTAACAGATCCTATTTTTGCTCACAGACTAAGATACATTAAAACTGGGAGAAAGAATGTATGAACTCAAGGAACCATTTTACCCACACCTATACTGATAAGCCTCTTAACAGCTTCAACTAATTCTAGTCTTACTAAATATAGATCAGCTCCCCTGTCCCCAGAA…	LQNI*DFIIHSEIPSLILFL*YNYCFEYILLQMKNRECINVKKFKR*VS*HFKNPKSLQSTLLYPHY*NILNYNTTAF*QILFLLTD*DTLKLGERMYELKEPFYPHLY**AS*QLQLILVLLNIDQLPCPQNHPHLQHEPEGLPPT*PRRSV*HTQ*WTAECQQ**LPAQLSWGAYPLPPGPEPLYSLG*KEIKQTKRNFRKPVLQFLLTPALEYQVQ*SLISTLSFSFPILPYSRYYCLLKLKIQYL*ETRINLSNSLHLTCTQKKSPFYTIYSYRVMKALWVKQNPLNITHSTR*WWRTPLIPALGRQR*ADF*V*GQPGLQSKFQDSQGYTEKPCLEKPNQKEKENKAKNTRSFFSY*ANILSGTIPTKYSSKENLTLVFTLTISSLKR*KRKTI…	16.8746	1.66295e+06	960	61	20.6667
EMBOSS_006_1	1	EMBOSS_006	ENSMUSG00000021268	ENSMUST00000143272	Medium	[K].RNVHEDRGSHSR.[S]	RNVHEDRGSHSR	GACTTTTGGTAAATCACCTTTTGCCGTTTCCTTTGTCCCCGTGAAGCCCCCCCTGGCCGCCCCCTCCTCATTCTGGGCTGGCTGGCTGAGGGGGGGGGCAGCCTGAGGGCTGCGACGTGGCAGGTTTCTAGAATGTTCTATTGATGGCCGCAAGAGGGCGCTGGTGGCACTGCGGAATTTTGGGGGGCGGGGTGGGGAGGGAAGAGGAGGTGGCCTTTGTTCTCCTGCAGGAGGGGGTCGGGAGCGAGATGGGTTGCGGGACCATGGGTTCATTTACCTATGGGGAAATGTTAGTAGATACCTGGATTCACTAAGGTGCGCTTGCAGGACTTACAATAGGTCAGAGATGGCGTCATCTGCAGTGGCTGTGTGATTTAGGGTGTCATGGACGCAGATTAA…	DFW*ITFCRFLCPREAPPGRPLLILGWLAEGGGSLRAATWQVSRMFY*WPQEGAGGTAEFWGAGWGGKRRWPLFSCRRGSGARWVAGPWVHLPMGKC**IPGFTKVRLQDLQ*VRDGVICSGCVI*GVMDAD*FIFSDLCFLGS*KGVAF*GRIAKNIN*LGVIHKGLES*RGKGGARF*GEGC*LGGGRQGGLPLFCHIAEDLKNECSVLRIESLNFNYA*LDLLMVGGGSVLLLLIRSRIVVWGQPLTAGSLWCKAAPGCLCVCCVMSGKWLRQRRWGCIATLKDG*CGLCPPPPSLKPVGRPPPSYVSLALAAASWRLWGCLRWLGYWSLSECGPRAP*RSLCANGSWPARLALELRMRTQLTLVTCQSIHLYPSHCCPPLPFLLLLLLPFLLSLF…	6.90162	1.7177e+07	error	133	44.3333
EMBOSS_070_3	3	EMBOSS_070	ENSMUSG00000092341	ENSMUST00000172812	Medium	[M].TMQREQLLGEVISK.[G]	TMQREQLLGEVISK	CAGGCATTCAGGCAGCGAGAGCAGAGCAGCGTAGAGCAGCACAGCTGAGCTCGTGAGGCAGGAGACTCAGCCCGAGGAAATCGCAGATAAGTTTTTAATTAAAAAGATTGAGCAGTAAAAAGAATTAGAACTCTAAACTTAAGCTAATAGAGTAGCTTATCGAAATATTACTTAGTCTTAATAATCTAAGAAGATCTTAAGAGATAACATGAAGGCTTATTTAAACAGTTTGAAAAAGGAAATGAGGAGAAAAGTATTTGTACTGTATAATGGAGGCTGACCAGAGCAGTTTAGGAGATTGTAAAGGGAGGTTTTGTGAAGTTCTAAAAGGTTCTAGTTTGAAGGTCGGCCTTGTAGATTAAAACGAAGGTTACCTAAATAGAATCTAAGTGGCATTTA…	GIQAARAEQRRAAQLSS*GRRLSPRKSQISF*LKRLSSKKN*NSKLKLIE*LIEILLSLNNLRRS*EIT*RLI*TV*KRK*GEKYLYCIMEADQSSLGDCKGRFCEVLKGSSLKVGLVD*NEGYLNRI*VAFKTVKL*RIV*K*GVVLKD*EK*VKLTAVIKILRLAHVRLKA*VGNREDGSVRLAGRWWRTPLILALGRQRQADF*VRGQPGLQSEFQDSQGYTEKPCLEKTKRLG*YLEKED*KMEVKDEEDIQEGEEKAVREDRKIEDKASLEDRKGT*RHR**EAEE*KIERSKIEKQNGS*DNFGCQHSR*AKKIRLRPKGWIRYKVRRKLSLKP*VQISDGASSLEESLDSHIQD*S*QSKLLGLK*KVKAECL*RVRRILKALTCSLILLDD…	45.2814	1.71629e+07	error	209	70.3333
EMBOSS_173_1	1	EMBOSS_173	ENSMUSG00000097479	ENSMUST00000181481	Medium	[N].KNANTMSVPLPK.[L]	KNANTMSVPLPK	TCCTTTCGGTTCCGGGCGGTGGACCGGAAGAGCCTAGTAGTTTATTTAGCCGAAATTGGTGGGATGAGATCTGTTGACAGACCTGACAGGAAAAAGGACCCTGGGACGCCAGCCTGGTAGGGAAAGATTTGGGGTGGAGCCCAGAGAGGACCAGAAAGCAAGAAAGCCTCTACGCTATCCTGAAGAGTTTTTCAGAAAAAGGAGCTGGAGAGATGGTTCGGCATTTAAGTACACTGCCTGCTCATCCAGAGATCTGAGTTTGATTCCCAGAATCCACATGGCAGTTCACAGCAGCCTGGAGAGTGGAGAAGTCTTCCATGTTAACAAGCAGCTTTAAGTGGTCACACGCGTTTACTCCGCCCGCTTCTTGCTTGAAACACCAGAAATCTGATATATACT…	SFRFRAVDRKSLVVYLAEIGGMRSVDRPDRKKDPGTPAW*GKIWGGAQRGPESKKASTLS*RVFQKKELERWFGI*VHCLLIQRSEFDSQNPHGSSQQPGEWRSLPC*QAALSGHTRLLRPLLA*NTRNLIYTD*SNCNQITLAILVVHWDLL*RQTTIQQLETLLTELFKDSCKNKKMSSQT*IQEPFGC*HQFKSCAK*VTVPVPHP*ELPFFPLKIAVSALRFTCRLGESDCF*NVTKCPPRCLTFPRTE*LWFYSSHWS*KKSQLETQWTSPFKHT*LPPSPTEHRC*LKNKINNKHPFY*FERYCNFYTSMIFFNVLQLCGFAVQQFIDHTVQDHQQDWNDVIEGTIMLITLPENRIQEGQLSLDTA*RREGRSVLSSHPSIPVLKRANRKLTK…	21.2351	1.56014e+06	error	64	21.3333
EMBOSS_297_1	1	EMBOSS_297	ENSMUSG00000114384	ENSMUST00000224680	Medium	[R].KPNLNNVLLLNKEL.[R]	KPNLNNVLLLNKEL	ATTCCATCCTCCGGGTGTTTGTCACAGTTCAGCATCCAAGCTGAATCTCTAGTTACCATGGATGGAGATGACCTTTCCTGGCTATGCTAGCCAGCTTTCTGACCTCAAAAAAAACACCAGCATTTAAGGCCAAGAATCTGAATCTTTGAGTTTCCTTCCCCCACACCCAATCCACCTGCTGAAGCCTAGTGACCAGCTGAACAGAACGGAGAGGTAGAAGATTCAGGAGATGGGTGTCACAGGTCCTGTCAGCTGGGTGGCCAGCTTAAGTTCTCCCTTCTTCGGAGCAGAAGGCTTCCTGGGGAAAAGTATGTGCTTGAGGCGGTACTCCTTCAGGCACTGCACATTGGCCTACAGTAATTCATTCAGTGGATTTGTCGCCTCCTTGGGTCCACAGAG…	IPSSGCLSQFSIQAESLVTMDGDDLSWLC*PAF*PQKKHQHLRPRI*IFEFPSPTPNPPAEA**PAEQNGEVEDSGDGCHRSCQLGGQLKFSLLRSRRLPGEKYVLEAVLLQALHIGLQ*FIQWICRLLGSTEMLKATTYSDLEQDGRRSHALSGC*YQDSQGAVCGPFYQEQ**CVSPQCDLCR*QHDASR*KG*TCPWTEEKRLHLKQNPEMNRLLQLCLCRGAAPSERFAPWQQGPLPSETALVPSVYLRLARHFPSI*DSLPFLGFATISKCLRNMDRT*LTSHSKVAPNEDNGSKLTNSS*TLPEGEMERFDTDIHAQGATDASENRDL*SFLRTDTRKQEVWVTVRKDGCQHIFDSPEGYPYELRFICPMIANWMSSCPWGLSRP*ETDTYSK…	8.16797	4.868e+06	error	58	19.3333
EMBOSS_112_3	3	EMBOSS_112	ENSMUSG00000097772	ENSMUST00000180779	Medium	[K].KSLILPLKFHKPGLH.[F]	KSLILPLKFHKPGLH	TCCATTCGGTCCTCCTTTTGTTAACGCTCTGGCATCATGTCTACGCCAGCTCCCGCGCAATCCGGCGCCATCGCGCTTTGGGCGAGCATGGCCATGGGGAGTAGAGAGGTGGAAACCGAGCTGACGCCTGCCTGACCCTGGCGATGGTGGCGCGCGCCGGGAAGGACTGATTGGAGAATGGCGCCAAATGGGTCACGGATGGCGAGGGGGCACAGGAGCTCTCGATGTGACCTGGCGCTGTGGATGTGATGCACAGCAGCTTGAGTGGGACTGCTCCGCTGTCCTCATGAGAGAACGCTTTTTCTGAAGATGGGAGGTGGCTAATGAAAGAAGGAATTGTGTTCTCGGTGATGCCTGGAAGAGATGCGTGACGTTGGAAGATGATTACGAAATACAGGA…	HSVLLLLTLWHHVYASSRAIRRHRALGEHGHGE*RGGNRADACLTLAMVARAGKD*LENGAKWVTDGEGAQELSM*PGAVDVMHSSLSGTAPLSS*ENAFSEDGRWLMKEGIVFSVMPGRDA*RWKMITKYRKGRVICFVYIKYSE*YSLGKIMK*RLES*RLW*NLNYLFSGWQRTFI*TIIVSLLVWRSEDDLEVSPTQASCLNDRPLCVWVFCLHRVHTWCLRRL*GGIRSPATAVGE*SCHVCAMNRTPVLLTLKQSVLVRVSIPGQTS*PRSKLGRKGFIRLTLFHIAVHHQRKSGLELKQVRKQELMQRPWRDITHWLAQPALL*NQDYQPRDGPTHKGPLPLDH*LRKCFTAGSHGGISSTEAPSPIASHRLSLWCQASTPLHDPFSPGPSI…	3.44038	2.22408e+06	530	37	13
EMBOSS_088_3	3	EMBOSS_088	ENSMUSG00000073155	ENSMUST00000152147	Medium	[F].ILPEIR.[L]	ILPEIR	GAGCTGGAGCTGGAGCACCTCTCACACCCTCCTCGCCCTCCCCACCGACATCATGCTCCAGTTCCTGTCCTTCAAGTTCCGAAAACTTTGGGGTGTCAGTGATATGACTGCGTTTTCAAAAAACCACTTACTGTGAGCTCTTGGCGAAATCTTCGCGCTTGGATTTACTTTGGGCAACGTGGTTGGAATGTATCTGGCTCAGAACTATGAAATGCCAAACCTGGCTAAAAAACTTGAAGAGATTAAGAAGGACCTGGAAGCCAAGAAGAAGCCCCCTAGTTCCTGATGCCTGCCTGGCACTGCAATCTGGACCCACCAGTTCCATCCTGGGGGGCCTGTCTCCTTCACAGCCACGTCCAAAGCTGTGTTCCTCTTTGGTCTCAGACCCTGCGCGTTGCT…	GVNRNLAAGSALAPGRSPGAELELEHLSHPPRPPHRHHAPVPAWIYFGQRGWNVSGSEL*NAKPG*KT*RD*EGPGSQEEAP*FLMPAWHCNLDPPVPSWGACLLHSHVQSCVPLWSQTLRVAEAPARARSGVSFPFPASPRSRIFRPPASET*AWNHGARLAAATMTGLTRLCSGIPTAYCQEMNGFG*LLGTHCLAVITGAC*TN*TVLKSLKSVSSSQFLVN*SIYYILLPRSSMVDDLTSKSFAGH*PGNYFMHSIKSKQTGKT*NMQSNCCLRTVQSMQSMFFLNDIFELNLP*KSHSLCWHLIGWVDK*GAVDKIMLLFFF*TLKCILII*LHSEPPKRSVVQMCGKVSLSGIWDLMLPPPPPPTPTPTHPPPPVEASSPEAGRTIRRQQLHF…	7.60156	1.90435e+06	616	53	18.3333
EMBOSS_227_2	2	EMBOSS_227	ENSMUSG00000097660	ENSMUST00000180864	Medium	[S].LTLPMFLKQMHIPPLK.[G]	LTLPMFLKQMHIPPLK	GGTTTTACGAGATAGGGTTTCTCTGTGTAGCCCTGGTGGCTGTCCTGGAACTCACTTTGTAGACCAGGCTGGCCTCAGAAATCCGCCTGCCTCTGCCTCCCAAGTGCTGGGATTAAAGGCGTGCACAACCACGCCTGGCTCTGCTTGTGGGTTTTCTAGTCTTATTTTATGTGCATCCATTTCTTTTCCATGTATGTATATGTACCACACGCATGCTGGTGCCCACAGAGGTCAGAAGAGAGCATTGGAGCCACTGGAATTGGAGTTATAGACAATTGTGATGCACTGTGTGGGTGCTGAGACTTGAACCTGGATCTTCTGCAAAAGCAGCCAACGTTGTTAACTAAGGAGGCCTGGTGCCAGGCACAGGAAAAAATATTTAGTTGCTCAGCTTCTCAC…	VLRDRVSLCSPGGCPGTHFVDQAGLRNPPASASQVLGLKACTTTPGSACGFSSLILCASISFPCMYMYHTHAGAHRGQKRALEPLELEL*TIVMHCVGAET*TWIFCKSSQRC*LRRPGARHRKKYLVAQLLTQSRTHKL*EKNTFLI*VHTAFLPVYEVLGHTPLLFCI*KQCHHSPPGWPPECWVTGCATTPDQ*LTVQ*QDNTATVTDNPDKGGEVFFWLLFLLYCVIF*YMDLNNDQVRVTGISIVSNSYHFSL*ELACHMPGSLALTSDSPTSASPLLRPAAATLA*LYSLLLRGPVSGSRIPHWDRHWLAVFCLPFHWVF*FETGSPHIAQAGPGLANLPTSGSLC*DYRHDPPHPSCAF*TKNTWSV*SQPIQEPALTGCHPAIAMEGD*HR…	29.1976	931875	1057	169	56.6667
EMBOSS_136_1	1	EMBOSS_136	ENSMUSG00000097767	ENSMUST00000182953	Medium	[L].EQLDVSPSLAR.[G]	EQLDVSPSLAR	TTTCACAAGTTTTGATCCAGCGGCACTATATTGGGGCTTAGAAGATGACAATTACATCATGGTCTCAAAGGTGTGGATGGCGCTGGTCTGGAGCATCACAGAACCAAGGTTTTTAGCGACTCTTTAGCATCCCTGTAAAGCTCGTGATGGTGCCAAGGAGTGCAGGCAGAGCAGATGCCAAAATTAGAGACCTCTGCCACAGACTTGGGTTCGAATCTTGCCGCCGCCCTGACCAGGACTCTTCCTAACAGAGTTCCTCGGCAACCACGCCCCGGCCCTGAGAGCCAAGCACGGATACCGGGTCCTCTTCTGGGATTCTAGGCAGTGCTTCTCGCTTAGGCGCCAGGTCCGCGATCGCGCCTCCGACCGTCGCGCGCCTCTCCACTGGCCAGCGTTGCT…	FHKF*SSGTILGLRR*QLHHGLKGVDGAGLEHHRTKVFSDSLASL*SS*WCQGVQAEQMPKLETSATDLGSNLAAALTRTLPNRVPRQPRPGPESQARIPGPLLGF*AVLLA*APGPRSRLRPSRASPLASVAMAAPQGGDAEAEARSSPFVRRGRDVHPTSLCLSPGPQDGCLFVCPTPPPRPRPGAATPPASRSCIKISWALQ*TRRRRRLRWGAVGREAADQSGEEFARGGAWEDSPSSVKSWAQRALCTPAAGARRSRARCTWAWGLRYNTNPQDLGRPAQPQTQGISALSSRRRSGCCLHILGESLLWHNSPARCWNSVCSHHTDMADLSQWYLGAKQGAGRWRPTLLPSWLCLNTGTEPSEPQEFLLVPRWWKSGEIWERSRLACKAALQISI…	0.999065	1.10961e+06	error	45	15
EMBOSS_292_1	1	EMBOSS_292	ENSMUSG00000101722	ENSMUST00000187121	Medium	[L].QLLQLVK.[L]	QLLQLVK	AGTCGATTCTTTCTACTCTCCAGATGTTACAAATAATACAGCCAAAACAGTTTACAAGTGCGACAAAGGACATCAAGAGCACCAGAAGGAGGGCGTCAGAAAGCCTCTGGGGACAGGAATCTCCCTGCGTTGCAGACACTTCTCCAAGAACTGCTTGAGACGTATGAAAGAGCCCATCTGTCCTGAGCTCGTGATGGCCTCAATTCTGGGCAAGTAGTCCTCTTGGATGAAAAGTATCATCTTCCAGAACTGGACCTGGTTCTGCTTCATGAGGGCGTTCCCACACACCTCCAAAAAGTCAAACAGGAGAGTGGCTGTTACACCTGAGAGAGGCTCCATGTTTAAGATCTGTGCCAACCAGCGCCAGCCATGATTTAAGCCATGAGGATGAACCTCCTG…	SRFFLLSRCYK*YSQNSLQVRQRTSRAPEGGRQKASGDRNLPALQTLLQELLETYERAHLS*ARDGLNSGQVVLLDEKYHLPELDLVLLHEGVPTHLQKVKQESGCYT*ERLHV*DLCQPAPAMI*AMRMNLLPVCIWPLELDDGGIQTDHPRHAFQKAFLPLNLGIHNLIAKHPLIILQSHPFLESWVERNGVWTLLVEMSKNEVSHFGVEHPDTRSHRRNGECRFVVRGHFLLPLFHKFLCQFVLDKVQPLRVKSDRHGTPSRLDRLSREQTVELIKDLLQL*T*DAGDLAHWNGGCLPQIRPYLFRLTVLAAGQVLKGQHTFGGSILKLLVPLQCTILYLPLQVFILRTCWAWAGCRALGGNSWPLLHL*LLPLDLGLFLLVLLLHFRGSGDLLLQ…	2.49835	2.00969e+06	547	24	8
EMBOSS_060_1	1	EMBOSS_060	ENSMUSG00000075591	ENSMUST00000100526	Medium	[R].FQKMTLTHSQE.[G]	FQKMTLTHSQE	ACTACATCTTCTACTGTCCCTGTTGAAGTGGCAACAGACCTGTTGGTTTTTGTAAAGCATAATTTCTGTAATGTGGTCTGCTGACACAGTTTGCTCCACACCAGGAGGACGAACTTGAGGACAACTGTTAATGACAGAACTAGTTATTTTTCTCTTACAGCCTCTATTACGTGAGGCTCTACCGGGGTCCACGGGGGAGCCCCTGATACCACCTGAGGCTTTAGGTAAAGCGTCTGACCTATTCCAGTGCCATGGCTGACAGGTGTTTGGTGCTGTGATTTTTCTTGCGTGTGTAAACTTTCAGAAAAGCTGGAGACAAAAGGATGAGGGAGTTTGGTTTAGAGCCGACGAAGTTCCAGATACCAGCCGAGGAAGCCTCTGCCCTACCTCTCTTTCGAG…	TTSSTVPVEVATDLLVFVKHNFCNVVC*HSLLHTRRTNLRTTVNDRTSYFSLTASIT*GSTGVHGGAPDTT*GFR*SV*PIPVPWLTGVWCCDFSCVCKLSEKLETKG*GSLV*SRRSSRYQPRKPLPYLSFEERVQLLSCAPWLETGSIHHHPPSLTLHMTLTSAKAVGKVVSVPSHLGITW*PGEWHGQGSPHCQR*PLPRRFGHPLSCRPRTPWSAAPPALALGR*NRTCRSGR*CAASCGKSPLSSGWRPAGSSC**CGQPCLSPLATIASASLEKSGWLL*SGPH*EVGWNTGDGSRSSAVTPPFWLLLHLCRPP*RLPHAHRTGPCSWHTIGRGRH*CPAR*SAARPRHPYHHHRWQSLGRPCQRMRRDSFSSPRTLSPSTARDEGPRLWGCE…	48.913	8.31549e+06	613	71	23.6667
EMBOSS_307_3	3	EMBOSS_307	ENSMUSG00000112346	ENSMUST00000218379	Medium	[K].NKNKNNLPIC.[L]	NKNKNNLPIC	AGTTCACGAAAGTTGTCTGTCAGGCCGGGACCAGTCGAGTCCTTACCCAGCAAAGACCCAGGGACCCAGAGTGGCCGGGTACATCCCATCGCGCCTGGCTCACTCAGGCAGGGATGGAAGAAAGGCTTTCTGCCAAGTGAGCTTTGGTTACTGTCAGAAAAGGAAAGAAGAAAGAAAGGAAAAACAAAAACAAAAACAACTTACCAATTTGTTTGCAGTTGGGGCTGAAGTCAGCGGAGGTGATGGCAGCTTTGTGACCTTTAAAAGAACGTTCCAGAATCGGATCCTCCTAGGATGGAAAGTTGTTAGGTTTGAAAGCAGGTGCAGAATTCCAGCTCTCGACATCAGACGTCAACGTTGCCTGTCCCCCGGGATCGAAGAGGAGGACCCCGCAGCATC…	FTKVVCQAGTSRVLTQQRPRDPEWPGTSHRAWLTQAGMEERLSAK*ALVTVRKGKKKERKNKNKNNLPICLQLGLKSAEVMAAL*PLKERSRIGSS*DGKLLGLKAGAEFQLSTSDVNVACPPGSKRRTPQHQRAAREAWALQPG*EARALPQLPSGGVPTIGRNPQPRHQGEPPRDPPTAPSCRCSPKPPALFKPPW*F*RRRAAGTQPASPGASSASAPSAGISPGAALTAQPGHGVPLRGGERAAELRVSGLPPRPARLGVVPLLPVPPPKDDRLR*RRGPYQAGGHAGSGRRPGPWGTREGWGRGGTVRRPEPSDWSAGASRSLQQRRPNQSPRSRRGQTSPETPRARALPTAESLAGARRGGSAARAHSEPRELRR*RTTGLLSGSGLGLGERE…	1.23681	4.03896e+06	61	114	38.6667
EMBOSS_360_1	1	EMBOSS_360	ENSMUSG00000110605	ENSMUST00000212145	Medium	[E].TLDKINHR.[D]	TLDKINHR	TTGAATGGTCCTGTGTGCTGTGTTCTCTGTCCTGCCTCTGGATGCTGTGGAGGGTGCTCAGGCAAGCTCCGAAGTTGCGACATGGATGCATTGACCTATGATGATGTGCATGTGAACTTCACTCGAGAAGAATGGGCTTTGCTGAATCCTACACAGAGGAATCTCTACAAAGTTGTGATGTTGGAGATCTACAGGAACCTCAAAGCTGTAGGATACAATTGGGAAGACCAAAACACTGAAGAACATTGTCAAAGTTCCAGAAGACATGGAAGGTATATCCTGTGTCACAATGGATACAAGCCATGTGAGCATAGGGATATTGAAAGAAGCAGAACCTTCTCTCTCTCTCAAAACAATTAAAATATATGTAATAGTCCACATTTGAGCAAACTTTGTGAT…	VLCAVFSVLPLDAVEGAQASSEVATCF*ASWLIPLEIRVSPELCH*TTSCVCIKTVSHDSLGARYLVT*VGVSPWRSFIWRFHQDLRDTQEPRRPLGGTAAEEASCAGARPRGAGPHERDGECNTPPAPAPPPPHTSAPKGWEEKRGRARGIHVSTHQVP*ERLHQSHRTDLPHPRPWAPLLQTDGQEEEEETVGVASQEHREFPGCF*YLPNYISLSPASHLPVSRLWQFQSASC*QKKCFHFEMSVAQLGSFRCPMCLIRRLCPELLAVSLLQVPSRETSAHLGLLLPKVRSICESNRQALMMVSSLWG*EVPQQSDQDNKKLQKLEKDRVSR*ESAEEEKQKKKEDEEDRCI*RSRKK*A*TVRKSKASADSGEIDDSDK*RG*Q*RKVKERERSE…	3.12889	5.39606e+06	927	5	1.66667
EMBOSS_084_3	3	EMBOSS_084	ENSMUSG00000078952	ENSMUST00000179324	Medium	[G].KGCLITVSSVVNDMKNIFIGR.[G]	KGCLITVSSVVNDMKNIFIGR	TTCATTTTCTAGCGATCACTTTCCTTCTGCTGGTGACACACTGTTACTTCAAAGGCCTGGACCGGGGCGTGTTTCCTGTAAGGGTGAGCAGATTTGAATGACCGCTCAGGATGGACCTGCTCTAAGCCTGACCAGACTTGGAACTGAAGCACCTTAAGGACAAAAGAAAGACTTGCTGAGCTCGCTCACAGACCTTCTAGAGCAGCGCTGGGCTCATGGATCTGGAGATTATGGACAGAAGATAATGTAGATGTTATAACCAGGCCAGCGTCCTGTGGTAAAGGGTGTCTTTAGATCACTGTTTCGTCGGTATAGGTAAATGACATGAAGAACATCTTTATAGGCAGGGGATGAGAATCTGAGATGAAGAAAAGAGGCTCCCCTGATGGACCATTCTAA…	DFLVGWKKIGSRRELGPFWNGDSREQLV*VQEGKIWWPSMRCSTKAVGDLKHEKPDQTWN*STLRTKERLAELAHRPSRAALGSWIWRLWTEDNVDVITRPASCGKGCL*ITVSSV*VNDMKNIFIGRG*ESEMKKRGSPDGPF*ATVRSRIHRT*GHDCNNYQTLAS*VMVIF*YFGFLLSFHKGTSFLASIEDIKSSHSIFSLLGAVNHFKAVFLLDHLHIKVFLLSTVISPPVVCCVPVLSGS*GLGKCGFQVTGVFLQ*SFFVGSYLGGQWGRARAILFFAGCDLSCSASGFHAETTFSHHRVGLLFTFW*FQYCFCMGFEFQS*ICVV*QREPLHKGLPICNLFMLPLVRSTVHSRH*TLPACVLVSPPTSVSLCTSISITVHQHQHHCVSASA…	62.6287	1.01233e+07	error	98	33.3333
EMBOSS_036_2	2	EMBOSS_036	ENSMUSG00000048106	ENSMUST00000059704	Medium	[G].RINKQMR.[E]	RINKQMR	GTCCAGAGGTCCGTCTGTGGTTTGGGGGTATTTGGGTGCCCCTGGAATGAAGTACGTTCTGAAGTATGCTGCACCGAAGTGAGGGGACCGGGAGTCATGGAGGGCCAGAGCGCAGAGATGCTGCAGGCCAGGTGGAGGCGGAGAAGTTGCAGCGCCTCCCAGTGCACAAAGAGCTGGAGCAAGAATTCGACCTTGGCACCCTACCGGCTCCGGACCGCACTCCCGGACAGGCCGAGCTGCCGGCCTTGGCGCGGGACAGCACGCAGCTGCTCATCACCGTGCTGCTGCCGACCGTGCGCTGGGGGAGGCGGTGGTAGCGCGCTTGCCGGTGCCCTCCACTCGCTTGCCCCGCGGGAAGCTGCTATCCGTGCCGCGGCTGCTCACCCGCTGGCAGCAGTT…	SRGPSVVWGYLGAPGMKYVLKYAAPK*GDRESWRARAQRCCRPGGGGEVAAPPSAQRAGARIRPWHPTGSGPHSRTGRAAGLGAGQHAAAHHRAAADRALGEAVVARLPVPSTRLPRGKLLSVPRLLTRWQQFARHQSIHPRRPLSCGTR*VASDGADWTASSPGTTVWNG**MCLGAPDPMEADLGQEGTRGQERAKTTADPSAQDVDAQLSRPAPNETPE*GGAGLRPASGQ*LHRCSGTLPGAPL*GEDAPRAPEEEEVLVPL*GLCDRENDQLELLKVKNSKKPHQDVRGRINKQMREEENEPERRRERGSSKDL*VRAGAGEMA*QLRALTSLPEVLSSIPSNHMVAK**IINL	1.89255	4340366	295	47	16
EMBOSS_135_3	3	EMBOSS_135	ENSMUSG00000097616	ENSMUST00000181225	Medium	[H].MVISNHSYLGQWK.[R]	MVISNHSYLGQWK	AGGCTGCTTGTTGTTCGGGTTTCACAAGTTTGCCCTCTGGTTTTACTGTTAAAGAGAGGCCATTGTAACTGAGAACTAGCTTCGAATACAGCTGCTGCTACATCTTTCCAGGCTTATGAGATAATCCTGTTTTTGGTAGCCAGGTATTTAACATCTGTCTTTCAACGGGATGTAACTCTCATCTACTTCTCCAGAACCAAGTCTACATGAAGCCATGTGCCTGCTGCCACGCTTCACACCTGGATGATAATGGACTCACCTCTGGAAACAAGCCCCCAAATTATATGCTTTCTTTTATAAGAATTGCTTTGGCTATGGTGTTCTTCACAGCAATAAAATAGCGATGAAGACAGTAGTTGATACCAGGAAACCGAGTATTGCTGTGACAGGCATGACCAT…	AACCSGFTSLPSGFTVKERPL*LRTSFEYSCCYIFPGL*DNPVFGSQVFNICLSTGCNSHLLLQNQVYMKPCACCHASHLDDNGLTSGNKPPNYMLSFIRIALAMVFFTAIK*R*RQ*LIPGNRVLL*QA*PCCILAECELWTRKVTEWFKSGFYGLY**QGHLYWKNVDKWETSTGSCRGRNHTK*IQSNLVTILDVFQQRGGCFCPCPENLPEFLINDGRGDVKTA*N*SYHMVISNHSYLGQ*WKR*S*TKRNTKCTD*GEKKALESVMELSPVLLED*NLKKNLTLSGIKRAVTSGKIPLS*GSNL*KGIKEV*AVKETIKKGKLMQM*MNQRAKFRPASS*IWQL*PSGSGLRVKEIKRASPYNIQRNGSSPTG*EKVLSPGKCCGC*GPPAGV…	1.24918	1.76415e+06	error	116	39.3333
EMBOSS_026_2	2	EMBOSS_026	ENSMUSG00000085788	ENSMUST00000122926	Medium	[C].TEAEGQIPRTGTVRR.[C]	TEAEGQIPRTGTVRR	GGACTTCCCAGTTCCTCGAATTCAGGGTGACAGTTTTTTTTCCTGCTCTGTATTGGTCTATCCTTCCAATGTAAATTCCTACTGACACAAGACCTGCTCTGTACCTGCATAATCTATCGTGGCTACCCTCGAACCTAAAATAGGAATGGGAAAACTGAGCCACACAGGTGGCAACCGGGTGTGCACCTCTGGGTGCACGTACTCCGTTCTCCAGCTTCTATTGCAGATCACTGCACAGCCACCCCTGCTCCTGGCAGACCTCTACATAAACTAGAATCGCAGCACGTACCTGATACCCAACAAAGACCGGACGAACGTAATAGATGTACCTGTAGTGCCTTCGCCAGGGCTCTAACCTGCCCAGATCTACGCTAAAATTATATACGCCAGCGCCCAGCA…	DFPVPRIQGDSFFSCSVLVYPSNVNSY*HKTCSVPA*SIVATLEPKIGMGKLSHTGGNRVCTSGCTYSVLQLLLQITAQPPLLLADLYIN*NRSTYLIPNKDRTNVIDVPVVPSPGL*PAQIYAKIIYASAQQLRVSICCLKV*GTCATRT*GCAEAHEKSLRPEPRGQSATAWRFLLLVSEPATMKVGGKESKGMKDRGHFLQTELGTEGALPVVGAGDSLATSGKRCAP*KPGDNLWCTGGARSWFS*PAPLLVVSKKPNTRSFP*IISTTTTTKKKKKKTKKPCRMYLRERSCLTYLLGSVPSTTKEKFS*TVFHKDKAELAFTGSCADSQLGKYPTKP*GEYTDFICVQNPR*LEFKS*PYLLPVYSTGRSYDNLELSCFVGLKD*TQVCWQALT…	5.25918	3.05255e+06	error	69	23.3333
EMBOSS_153_2	2	EMBOSS_153	ENSMUSG00000097119	ENSMUST00000181149	Medium	[A].KVMPVAVAKK.[E]	KVMPVAVAKK	CCTCAGCACGCTTGGTCCCCAGGGAGCGCTGTTTGTTTGTTTGTTTGCTTGTTTGTTTGTCTGTTTGTTTAACGGAGCGCTGCGCTGGGCATCCCGGCGACCGACGAGGACTTCGCTGAGTCCTCGGGGAGATGCAAACGAGTCCGTTCTCTTTCTAGGAGCTCCAACTCGCAGCGCCAAGCGCCGAGGATGCCGGACGGACTCAAGATCCTAACTCTAACCTGAGGGACTGAGCGACTGCTCGCCCCAAAGTGTTCGCTCTCCTTCCTGGAAGAGCCACAAGGGGTTCGAGGCGACGCCCTAGGGACCCTTGGGAAGCGTCACGTCAGCCGCTTTCCCTCATCCCTCGCTGTTGGGTGTCTGTGGAACAAACTCGTTTTCAGGACTGTGATGACTATT…	LSTLGPQGALFVCLFACLFVCLFNGALRWASRRPTRTSLSPRGDANESVLFLGAPTRSAKRRGCRTDSRS*L*PEGLSDCSPQSVRSPSWKSHKGFEATP*GPLGSVTSAAFPHPSLLGVCGTNSFSGL**LFFVVNLTISGITYNPEMEKSTPVRDCLLKVDESTSSPDL*GRKTHIFNLNLEVGRHKSLIQILRDVFCEHMSHTFSWMSV*GRKRRKLLLFVYLLLPC*HIHSLTGITTYFWIAAYTEDHLRHAALWD*ATTRFLDFLLLD*LDYRGRRERLIP*VL*L*RTLTNTDFGTRSGSREAEV*G*IF*VSGIGISIRRHLQLLKSLQSPPLLGAWRVLKAHGMNCITNLKR*MNLIILAHQL*ATMD*VTLYMKLLTVWGKIRKMMLLVG…	4.25302	5.73734e+06	error	132	44.3333
EMBOSS_224_3	3	EMBOSS_224	ENSMUSG00000097180	ENSMUST00000181574	Medium	[C].AWAGEMAQWVR.[A]	AWAGEMAQWVR	GCTCTTCCGCCGCGGCGCGCTCCTGATGAGTGCTGTGTCCAGGATGATCATGAATTCAAGCTCTGGAGCTTGAGATGAACTGGTCCGACTTCTAGAAGAGAAGGTTCCCCCCCCCCCCCCAGGAAAAGCCAGTGCAGTTACCTGACAGTGAGTAAACCCGATGTTTCTTGTGGTTTCGTCAGATCTACCATCGCCTGCCAGCCTGACCTGCTTTGACCCCGCAGACTGTCCCTGTCCCCTCTGAACAAAAGGATGGCTGTTGCACAGCAGCCCTATGGTTTGGTTGCTGCAGGTACTTAAAATGGCTGTCTGAACTTAAACTGGGAGGGTAGCCATTAGGAGATAGAAACCTACCTCCCATATTTCTTAGGAGTCTTGTGATTTGGAGACTCCATTTGT…	SSAAARS**VLCPG*S*IQALELEMNWSDF*KRRFPPPPQEKPVQLPDSE*TRCFLWFRQIYHRLPA*PALTPQTVPVPSEQKDGCCTAALWFGCCRYLKWLSELKLGG*PLGDRNLPPIFLRSLVIWRLHLFFIPP*MANHRGQGFTCHS*A*PELCSGAAYL*SWQRRVHF*I*GQPGLQSKFQNS*GYTEKPNHSSLIVSSTDLS*RFRLGPTQLHRPKG*FLIKSVRLLFPC*TPGLSESSNLPSPLT*FI*ASPASSIIELFSETVS*GRNIDLAVKMTRPSLQPPKQDY*FSEKISCPSLH*IPKKTTKCPDLATKIP*DTN*LTNEFTNILLLC*PITI*LFNPP*KEYKKSCAWAGEMAQWVRAPDCSSKGPVFKSQQPHGGSQPSVTMSD…	3.42275	1.99302e+06	361	26	9.33333
EMBOSS_250_2	2	EMBOSS_250	ENSMUSG00000048106	ENSMUST00000198527	Medium	[F].VISALGLPIFSNIGCSKLSHSQPR.[L]	VISALGLPIFSNIGCSKLSHSQPR	GTCCAGAGGTCCGTCTGTGGTTTGGGGGTATTTGGGTGCCCCTGGAATGAAGTACGTTCTGAAGTATGCTGCACCGAAGTGAGGGGACCGGGAGTCATGGAGGGCCAGAGCGCAGAGATGCTGCAGGCCAGGTGGAGGCGGAGAAGTTGCAGCGCCTCCCAGTGCACAAAGAGCTGGAGCAAGAATTCGACCTTGGCACCCTACCGGCTCCGGACCGCACTCCCGGACAGGCCGAGCTGCCGGCCTTGGCGCGGGACAGCACGCAGCTGCTCATCACCGTGCTGCTGCCGACCGTGCGCTGGGGGAGGCGGTGGTAGCGCGCTTGCCGGTGCCCTCCACTCGCTTGCCCCGCGGGAAGCTGCTATCCGTGCCGCGGCTGCTCACCCGCTGGCAGCAGTT…	SVVWGYLGAPGMKYVLKYAAPK*GDRESWRARAQRCCRPGGGGEVAAPPSAQRAGARIRPWHPTGSGPHSRTGRAAGLGAGQHAAAHHRAAADRALGEAVVARLPVPSTRLPRGKLLSVPRLLTRWQQFARHQSIHPRRPLSCGTR*VASDGADWTASSPGTTVWNG**MCLGAPDPMEADLGQEGTRGQERAKTTADPSAQDVDAQLSRPAPNETPE*GGAGLRPASGQ*LHRCSGTLPGAPL*GEDAPRAPEEEEVLVPL*GLCDRENDQLELLKVKNSKKPHQDVRGRINKQMREEENEPERRRERGSSKDL*VRAGAGEMA*QLRALTSLPEVLSSIPSNHMVAK**IINLKKKKHSRQPALGDKKKEELYQGSSVLPIDPVLPSCRLVQEVAAT…	1.89255	9.7315e+07	error	47	16
EMBOSS_117_1	1	EMBOSS_117	ENSMUSG00000097743	ENSMUST00000180752	Medium	[K].QLIGASNRTEI.[N]	QLIGASNRTEI	GGCAAAACCCCTGGTGCTTCTGTCCTTCCCACCTGTCCTGTTCTGGCTGCTTCAGGTGTGGTGCTGTGGACCAACAGTGATGCTGTTGCCTGGGACCTGAGATGCACAACTACAGGCAGGACATAGGGACCTGATGAATCAGATCGTCCATTTTTACAAGGCTCTGGAAGACCCATGGGCACATAGTCGAGGAAACACAGTATCTGTTTTAAGGTTACAGCACGCTGTGAGGAAAAACTCCTAATGACGCAAAAGCCGCAGGCAGAAAACCTTATTTTGTGATTTATGCTTATGAGCAGTCACAGCACATGTCAAGAGTATGCTACGGGACACATTTCTACTGTAGAGAGAATCTGTTGTGTACTGTATGGAAGCATCACCTGCCATAAATAAGTAGCT…	GKTPGASVLPTCPVLAASGVVLWTNSDAVAWDLRCTTTGRT*GPDESDRPFLQGSGRPMGT*SRKHSICFKVTARCEEKLLMTQKPQAENLIL*FMLMSSHSTCQEYATGHISTVERICCVLYGSITCHK*VADGLLAEAGRK*VEVLVGKRTLG*SGEGTELPLTME*NKRVG*VTSESEQAQAYNSISDVFILETKRLRGKSCSCIVTFYNYN*VAFPPLRISNLVV**MFKPDL*KVHVVVDMATLELSSGAHPESGFCFSNTNSQRLVENFNSKGF*FP*IFLTRTVPHCGNKLSRTLNVFDQWHKYM*TNLNRQQA*ILSLQLGRNI*AAPEFQTATGMVLGIQLKRGRFSILCGHCSCTLYAPISNLT*RRE*MSVHKFHLVRTSKLLL*YIL…	1.1184	6.63006e+06	error	80	26.6667
EMBOSS_079_1	1	EMBOSS_079	ENSMUSG00000097404	ENSMUST00000180505	Medium	[R].QHSPPPASCAPACLWVAAVFQPSR.[R]	QHSPPPASCAPACLWVAAVFQPSR	GGCGTAGCCCCGGCCATCTCAGCTTCACAGCCCCTTGCTTCCTTATTTTAAGCCTGAGTATAGAAGTTTTAGAGGAATGAGGACCCAGTTCCTTGAAGCCCAGGCTATGAGAAACCGGAGGGAAGGCCTCGTCTTGGAAGAGGACCCCACTCTGCAGGCATCTTGCCCGAAGCGTTTCATAATCCTGGCCCAGGAACTGAAAACTCCACGCACTGATGCCTTTCCACAAGCTGAACATCAGAGCACTGGACACTGGCCCAGCTACAGCGGACAGGTTGAGCTGAGCGCCTGGGTTGAGCTGCTTCCGGACCCTTAACCCTCAGGCAAACACACAGAAGACCTGAAGCAGGGGCTGATCAGCGACAGCCCCCTAACCCCAGAAGCAGTGGCCTGGGTCAA…	GVAPAISASQPLASLF*A*V*KF*RNEDPVP*SPGYEKPEGRPRLGRGPHSAGILPEAFHNPGPGTENSTH*CLSTS*TSEHWTLAQLQRTG*AERLG*AASGPLTLRQTHRRPEAGADQRQPPNPRSSGLGQTVVVWTPNFLPGEGEFGRLLRSLGLASLVAAQGRAQPGRALLPALLPALLPALLHRPSALVPPSLVLHLRPRLLPRSL*ALPYLPRNTFLLSLT*GVFQSPPPAPFLCRL*ASSARGQIGKWQSCLPGGAGRRSG*EGLDWDRRAPPARERVGQGVFLTRAAARVAEPPAPPYVALREGTGDDPAQ*RRQHSPPPASCAPACLWVAAVFQPSRRSAKQGLPLVAATACWSCPWLDES*LLPDARQTAPRHSKS*ELTASNFRTWAL…	1.83643	3.03027e+06	323	77	25.6667
EMBOSS_096_2	2	EMBOSS_096	ENSMUSG00000097284	ENSMUST00000180465	Medium	[S].INLESPIRGR.[T]	INLESPIRGR	ACCATAGAGTTTGGCGAGGCGTACTAGAGGGGCTACCTATTGCACCTCCCGGGTGGTTCGGGCTTAAGGTTAGCCAGGCTGAGGCTATGGGAGCTGCAGGTGGATACACAACCTTGGATCTGGTGTAGCTCTCCTTAGCCCAGAGACTTTTAAGTTAAACAAACGCCCAAGATACCTTTCTTTCACTAGAATATCAGCCGATTAACAAAAATGGTCCCAAAGCTCCGTGACACTGGACCCATTTTTAGGGCTAGAGATAGTCTTCTTAATCACTTTCTTCCCGCTCTTTAGCTCTGGGATGTCCTTTTTCTCCTGAAAATTCATATTCTGCCAGGTCCTTTAAAAAAAAAAATCGTTCCAACTCTCATCTGAAGCTCCGGCTGCCTTGGCTGCCAGTTT…	P*SLARRTRGATYCTSRVVRA*G*PG*GYGSCRWIHNLGSGVALLSPETFKLNKRPRYLSFTRISAD*QKWSQSSVTLDPFLGLEIVFLITFFPLFSSGMSFFS*KFIFCQVL*KKKSFQLSSEAPAALAASLAFVSDLSASSKERADSDASVLQ*QRYCRKYFMD*ERSIEPWEEWKSQRTGMSAVKCFLRDRIR*LHS*ALCSCDSLHKFKSSFQQASSRRQAQLRSGLKI*TKGVSCYLKDLNERSHGLSWYL*SPSTTHSVYAPPQALQQRFGSLPGEVIHTFIPETCQRLQIASLSATDTSSTTGSPGSYGASGRAARTTVWIS*KASCARSDSSFWVSGKRAGVTHRREESCVSRIQMDLLNIVLPSWWQEGPDAKTYPSPWKEYLYMPILLN…	0.868286	1.24248e+07	error	87	29.3333
EMBOSS_061_2	2	EMBOSS_061	ENSMUSG00000073000	ENSMUST00000101281	Medium	[R].KAGNEFLSGPGTDV.[A]	KAGNEFLSGPGTDV	AGGAAGTGGGTCGCTGAAATTGAGATGGCCACAGAAAAGGGACCATCAGATGTGCGATCATGCAGTCAACTGTGCAGGCTTGCAGGATTGGAGCCCTCGGATACAGGAGCTGCACTGTGGCCAAACATCCCTGTTTCTTCAGGTTTGGGAACAAATCGAGACTGTTTTCTTCCCGAGAAGCAAACACTTCAGATAACTAGCGGCAGTTCTTAGAAAGAATGTGAACGGATCTCCCCACCTCCGAAGCTGTCTGGAAACCTGGAAAGTCTATTCATGAGGAAAGAGGATTCACGATGACTGGAGATTTAATCAAGACCTTGTACGCACTGGGCATGGGCTTTTCTGTTGAGCTGCATCCTAGCCCTTTTATTTTGATTTGTGATAAAAATTGCAACATCT…	GSGSLKLRWPQKRDHQMCDHAVNCAGLQDWSPRIQELHCGQTSLFLQVWEQIETVFFPRSKHFR*LAAVLRKNVNGSPHLRSCLETWKVYS*GKRIHDDWRFNQDLVRTGHGLFC*AAS*PFYFDL**KLQHLDPDPIA*QEGKDPKLFMWLPCDRHGFLLQSLSKQRM*WFECALPRE*CNEKVWPC*SRCVLWAWASRPLS*LPGSQYSAISLQMKM*NSHLLLHHACLDTAILLP***WTEPLSL*ASPN*MLS*RELPQSWCLLTTVNP*LRHRALLIDDVCL*ELANSQLKAGYFTEP*RKYGEKRALIEAKPRKAGNEFLSGPGTDVAGLEYST*HHREEGALLEMGNLSEGLMAAAFQTPQEPACVYVYHPCAWRLLRSEEDIGSIPWDSSY…	1.91728	8.33418e+06	320	25	8.66667
EMBOSS_085_3	3	EMBOSS_085	ENSMUSG00000091021	ENSMUST00000172202	Medium	[R].LQPPFQILKQ.[T]	LQPPFQILKQ	AACTTCCCACATAACTCATCCATTCGACCAGTTTCCTATCTCACACTCCAGAGCAGAGGAAGGAACAATCTTAGTATTTGGAGGGACCAAGCACTCACTCAGGGTTTATCCTGACCCACCTGCAGCCTTCTGCTCACACACACACATTAAATCACAGGAAAAGACATTCAAATGCTTTAATTCAGATTTTAACTTATGACAATAATCTTACAGAGAATGTGGGAACAGAAAAATGACATATATGGTTTATATAATATGGTCTGGGGGAAACCTGTTGGGACCTCAAAAAATGAGAACCATGGTGAAGGTTCTCAAATCTAGACATAACCTATCAAAAGAAATGTATTTACCAGAGTTAAGTAGGCAGAAAAGCTTGCCCCAGCTTCTAATGGCCGAGGC…	LPT*LIHSTSFLSHTPEQRKEQS*YLEGPSTHSGFILTHLQPSAHTHTLNHRKRHSNALIQILTYDNNLTENVGTEK*HIWFI*YGLGETCWDLKK*EPW*RFSNLDITYQKKCIYQS*VGRKACPSF*WPRL*QTKF*HAVYNNYSVGAPADSLLSWKRGKKKQHKHQVPKVDIPKALGI*IFVSCMVCLLSHGPRDSEKS*EYAGADSKAQLHLQRCGKGLYITGQCPKLPFATRTEPGESDLPGYPRWNVWLAPKRLVNFNRRLHPPPPHTQCISLITYTWSRKH*ASLRVNVPPSTKYLKSLTGSAREDFNHHGPQDSEKS*EYAGADSKAQLYLQRCGKGLYITGQCPKLPLATRTEPGESDLPGYPRRIVMVMSFFLTKCHRVLLPDLQLEEK…	23.4192	2.69361e+06	413	172	58
EMBOSS_215_2	2	EMBOSS_215	ENSMUSG00000097410	ENSMUST00000181125	Medium	[K].EKEEQAMMAQRPQTPGSH.[L]	EKEEQAMMAQRPQTPGSH	TTTCTTTCTTTCTTTCTTTCTTTCTTTCTTTCTTTCTTTCTTTCTTTCTTTCTTTCTTTCTTCACTTATTTACTTAGACAAGGCCTTGGTTTGCAGCCTCAGGTTGCCTCGGATTTCTAGTAATCTTCTTACTTCCAAAGTGCTGTGATTACAGGCACACAAAGCTACATTCACTTTGAATGTCTGATGCTTTTAACACCCCTGTGCAGAAAAGTGACAGGTGTGTGGGTGTGCATTAGATAGTTGTGCTCAGTGAATGGGCCTAGAAGTGAAGGATCACAGCAGCAATGAGCACCCCCAGATCTTTGTTTCTAAATAGTGGTCTCCCCTATATAGGAAGCCAGAACTCATTGAAGAAATGGCTGGTGTTAGGACCAGAGCAGGGAAAGTGGAAAAAAA…	FFLSFFLSFFLSFFLSFFLSSLIYLDKALVCSLRLPRISSNLLTSKVL*LQAHKATFTLNV*CF*HPCAEK*QVCGCALDSCAQ*MGLEVKDHSSNEHPQIFVSK*WSPLYRKPELIEEMAGVRTRAGKVEKNKQVLKPELCQRVKESATGT*EPRWVSQSLRYEDMLGGEVHIFNPSTQKADLG*TVSSRPT*ATQRDFFLIFFSFFFMVSRDRVSLCSPGCPGTRFID*AGLKLRDSPASASQVLGLNLCQSLFSFKFTFIFMRAYVPVMVWYGCQRTFGSCFSASTIRKLRD*SQVARLGSKCRKN*PT*QPHSEISSQ*KQKTKKENSL*ILSYNSQEQTQENMFLV*R*IIHRQE*VPCTRFD*VGTVFNKAPLAPSAGVSCGMV*MKLLAYPI…	6.739	6.57393e+06	error	180	60.3333
EMBOSS_316_3	3	EMBOSS_316	ENSMUSG00000105402	ENSMUST00000198582	Medium	[I].KNIDSVNHSHLGSHK.[Y]	KNIDSVNHSHLGSHK	TGCATGCCTTCCCTGCCCTCTGAGCTCACCACACTGAGAAATGAGTACGGGGGGGGGGGGGGGGGGGGTGGTGCCTTCTCCTGTCACGTTCCCACTCCTGCCCATCTCCATCAGTACATTTAGAGAAGCATCGTCCTTACTCCTGTAACGCTGGCTTGAATTCTTGTATAATTCTGCCATCAGTAAAGGTCCAGTGATTGTTTTCATTCTCGATAGCCTCCAAATGAAGATTGTAGCCTCATAACCCTCGCTAACCTGAGTGATTCTGAAACTACACAAGCTGCATTTGGGAGAAGGAGAAGTGTCTGGGAAGGGGCCCCGAAGAGAGGAAGAAGAACAGACGGAGACCAGGGGGAACTGGGAAGGAGCAAGTGCGGAGGCGATCCTGAAGCTGCTGAG…	HAFPAL*AHHTEK*VRGGGGGGWCLLLSRSHSCPSPSVHLEKHRPYSCNAGLNSCIILPSVKVQ*LFSFSIASK*RL*PHNPR*PE*F*NYTSCIWEKEKCLGRGPEERKKNRRRPGGTGKEQVRRRS*SC*GRKMGELASSSFAAEMHGKYERILKEFSGREHILFSAGICSSSSSSLPTFPRRVHI*KQLFLSSGSRF*SLVWLQRIQHPLQGQTSSKDS*AETLAWE*AELSW*ATA*NLCLSPGNEEDVLSEVEGKSSSLSAGETVSEKQLPSVSPALGIQQVPLERLEPHTGVRALISCPRCVTLGKSIRI*EFLFTQVYVGFQPVLLLSINTFCFPYWLCTMTTVN*SLSSDSNRIRRNMSILL*WI*QKAFTSVHVVGVNIMESPTHQGLSD…	0.724219	3.44611e+06	500	4	2
EMBOSS_297_2	2	EMBOSS_297	ENSMUSG00000114384	ENSMUST00000224680	Medium	[K].IQEMGVTGPV.[S]	IQEMGVTGPV	ATTCCATCCTCCGGGTGTTTGTCACAGTTCAGCATCCAAGCTGAATCTCTAGTTACCATGGATGGAGATGACCTTTCCTGGCTATGCTAGCCAGCTTTCTGACCTCAAAAAAAACACCAGCATTTAAGGCCAAGAATCTGAATCTTTGAGTTTCCTTCCCCCACACCCAATCCACCTGCTGAAGCCTAGTGACCAGCTGAACAGAACGGAGAGGTAGAAGATTCAGGAGATGGGTGTCACAGGTCCTGTCAGCTGGGTGGCCAGCTTAAGTTCTCCCTTCTTCGGAGCAGAAGGCTTCCTGGGGAAAAGTATGTGCTTGAGGCGGTACTCCTTCAGGCACTGCACATTGGCCTACAGTAATTCATTCAGTGGATTTGTCGCCTCCTTGGGTCCACAGAG…	FHPPGVCHSSASKLNL*LPWMEMTFPGYASQLSDLKKNTSI*GQESESLSFLPPHPIHLLKPSDQLNRTER*KIQEMGVTGPVSWVASLSSPFFGAEGFLGKSMCLRRYSFRHCTLAYSNSFSGFVASLGPQRC*RQPHTVIWNKMGDVLMLYLDASIKTAKELCVARSTRSSDSVLAHSVISVDNSTMPPDKKARHARGLRKNACTLNRTLK*TGCCNCAFVGVLLHLKGLLLGNKDHFHLKQPWYLPFI*DLLGTFHLSETHCPSWGLQPFQNV*ETWIEHD*HPTAKWLPMKITDLSSRTQAEPSQKERWKGLTQTFMHKELLMPPRTGTCDPFYGLTLESRKCG*LSEKMAASTYLIPPKVIPMSSDSFVP*LPTGCPHVHGV*AGHERQTHIQN…	8.16797	5.89669e+06	74	58	19.6667
EMBOSS_166_2	2	EMBOSS_166	ENSMUSG00000097624	ENSMUST00000181658	Medium	[R].VLGVSSPRYGCLVCTSS.[L]	VLGVSSPRYGCLVCTSS	AGTAAACAAGTGGGTTTCACGGGGCCTGCAGCCACACCCGTTTCCCGAACCAGGGGGTGGAGGAGCTTGTGTGTGGGGGCAAGGTCCTTCCATTCCTGTTAGTTGATCTTTTCCTGAGCACTGGCATAAAGGATGGCTGGCCACTTGGATGCTTCTCACAAACCTGGACCATAAGGGAACTTGGAGAAACAAGTATGTGAGAACATTCTCAGTGGCATCTTCTGCATCTCAGAAAAGTCTCTGGAGAAGGAGGGAGCTGAAGAAATTCTGTCCTGTGTTGTTACCTGATGCCTTAAGACTCTTGCAGACCTGCAGGAGGGGTTGGAGAAATGGGTCATGGCAAACTCTCCAGTATTGGGAGCTCCCAAGAACATCTCCATGGAAAGGCTTCTCTCCTCT…	VNKWVSRGLQPHPFPEPGGGGACVWGQGPSIPVS*SFPEHWHKGWLATWMLLTNLDHKGTWRNKYVRTFSVASSASQKSLWRRRELKKFCPVLLPDALRLLQTCRRGWRNGSWQTLQYWELPRTSPWKGFSPLASGKPAPSMYLL*VLLRILLNTGHTLSPVDHLEHSKTIFLSRFLCGAQG*LLPQESSA*SRGPKKRNSGTPFMSFSK*SFACSLKLGSHLRVLGVSSPRYGCLVCTSSLGVTESMFGIGFH*EFYSVWKNRLSFKSLVWTPGSRTVVAVEDLDGH*ALF*ESSIGRPKSQTQEQLWLPELCGFSAFFPWKYCLQSQRDNVSSFSRVPLHLNPVT*SSSLCWRCLDRPAASHSQKGANFCVVLSEWNVLIEIFS*DKQDFS	2.311	8.38832e+06	225	133	44.6667
EMBOSS_218_1	1	EMBOSS_218	ENSMUSG00000097961	ENSMUST00000182943	Medium	[Q].EPTTIQSNSLWTPLGSGQR.[G]	EPTTIQSNSLWTPLGSGQR	GACGAAGAGCTGGAATAGAGCTCGCCTCGGCTCTGCTGGCCTTGGCTGCAGCTCTTCCAGAAACCCGGGGCGCCCACAGAAGAATCTCTTACCTGGCTCTCTCTTCAGGGATGACATCATCGGCTCACACCAGTCTTCCAGGACCACCTTCTGGATGCCAAAGCTGCTGCTCGAGTACCTGCTGTGCACCTCTACCTCCTGGTACCCCAGCCACTCCCTCAAGTTGCCTGCATGTTATATGGCCTAGCCAAGGAGCACGGATTCCAGGAACCCACTACCATACAGAGCAACTCCTTGTGGACCCCCCTGGGATCAGGACAGCGAGGGACAAGCGACAAAGAGGATCATCAGTGGCCAGCTAGTTTCTCTGGGGTTCAAACCTTGAACCAGTGCCCTAGT…	DEELE*SSPRLCWPWLQLFQKPGAPTEESLTWLSLQG*HHRLTPVFQDHLLDAKAAARVPAVHLYLLVPQPLPQVACMLYGLAKEHGFQEPTTIQSNSLWTPLGSGQRGTSDKEDHQWPASFSGVQTLNQCPSEGALAMALDLCSACVLSLSPFLYICARVHLLVNWSAALPEEGRPL*LIMLS*QCPEQKGPFGNLSGGGPGSGATSILLATPWVGWGGVLPSGMSTWLTPQGMSPPPPPPTFSEMSLLG*WGH*EQPPRVVVRIK*TAAA*GRAGQRPX	4.49076	810866	90	111	37
EMBOSS_095_3	3	EMBOSS_095	ENSMUSG00000087179	ENSMUST00000149275	Medium	[R].VPPHGQQQSGLNAGQAGLR.[L]	VPPHGQQQSGLNAGQAGLR	GGCCCGCTCCTCCTTTCAGAGAGTGTTTCCGGAGCGCCTACTGTGTGCTCCTCCATGGGGGTGGGGGCACTACCAGGCACAAAGGGTGCCAGTCCCCGTACCTTTGTAAGTTCGCCTCCTCCTCTGGGAGCTTGCCCTTGTGGGGATGGGGAAACTGAGGCTCAGTCGGCTCAGAGTAACTCCCAGGTGCTAAAGGACCAGTTGTTTTGTCCGCTCATAAGGCAAACGGCGCGGCGAAGACCACTTGGGATAAAACCCCAAGCCTAGCGCAGATGGTCGGCCAGGGGAGCCTCTGGTGGGCAGTCACAAGCCCACGGATTCCACCAGTGACCCCAGGCCTGCTCACATGAGTGACGCGTTCCTCCCCATGGCCAGCAGCAGAGCGGACTGAATGCTGGG…	AAWPGPGAERWDQGSRSQLQGRKWPAPPFRECFRSAYCVLLHGGGGTTRHKGCQSPYL*ASGGQSQAHGFHQ*PQACSHE*RVPPHGQQQSGLNAG*QAGLRLRCSRIFLLQVPK*HCTLHT*IPMPDG	3.27915	3.04954e+06	error	55	19
EMBOSS_319_3	3	EMBOSS_319	ENSMUSG00000115092	ENSMUST00000227784	Medium	[A].KISSPVR.[D]	KISSPVR	GGTTCATCTATGAAGCAGCTGGCTCCAGAACCTTCTGCCTGCCTAAGGCCGAATAATGCTCTGCTTCTGAGTATGCTGACTTGGGTTGTCTGTTTACCTCACTGCTGGCTGCTGGCTGCTGTCCCCCTGGGAGCTCCCTGCTTGGCTGCTGTGGCTAATGCTGCCAGGAGGAGCAGCGCTGTTTTCTGTGGACCCTTGTCTAGTTGTGGCGGTTGCTGGGAAAGATGAAGTCCCCAGACTGGAGCTCAGGCTGCAAAGAGGCTGGCATGAAGCGAGATGCCCCTTCTAGGCCAAGGCAAGATCTGCTGCCCTCTGACTTCTACCTGTTGCTGAGATGACTTCTGTCGCCAAGGCACCTGGATACCGAGCCACTCCTTGACAAAAGCCCTCTCCAGCCTG…	RTFCLPKAE*CSASEYADLGCLFTSLLAAGCCPPGSSLLGCCG*CCQEVSCPRISLFRPFFQFLRRHIQKQEKNLRSSVHSAHRPCSSWLQ*LSISISAVFLSQHGACNYISYLDAV*GGRMDPCKDTATAQGCLARQILQMFVSSEPGLECGLSGARLLAPPDASWKEFRML*DSFFPGGDQLTGVDKIMCVFVRARARVRVCACACRDQGSKRPN*DYPQISRLSNLMRW*QYLAHRSSYGSGFYY*GKDTGGGGAKKRGSKR*RIILVLKPPQFDKRLSLENVPGSRHREGTETSR*RSCSVAQPANQVPQLSSLLSPYVIWASSSFGGGVEGEERFLCRYV*LSNRERPLTLQGLQ*YHTLSPSEHT*P*SHPSWADLRHVNVTVSNSIFLSAFW…	2.46079	1.49971e+06	539	10	4
EMBOSS_183_3	3	EMBOSS_183	ENSMUSG00000097417	ENSMUST00000181323	Medium	[T].GLSRGGWGGVKK.[G]	GLSRGGWGGVKK	CCCTTTTAGAAGCTATACATAAAATGGTGGTTTTCCTTCTGTACTGTCACAGAACTTATACATACATTCTCAGTCCTACCTGTGAAAGGCCTAAGGAGAAAGAAACTCAATTTGCAGTCCAACACAAAGGGGAGAATTTCTAAAATAAATAATCCAACAGTTTTTTGCATTTTTTTAAATTAATTTTTCATTTTTTTAAAATAAAATAACCAAAAAAAGTGTAAAGTTACAAAAATGTTGTTGAAGAATAATATATTAAAACTGTGGAAAAAAGGAAAGACACGTCACAAAATTTTAAGATTAATATGAAGATCATAATTTAACATAAAAGAATATATTCTATGGATTTGTCATCCCGATAAATATGAACAAAATTAACAAAAAAAGCATAGTTTGGCA…	LLEAIHKMVVFLLYCHRTYTYILSPTCERPKEKETQFAVQHKGENF*NK*SNSFLHFFKLIFHFFKIK*PKKV*SYKNVVEE*YIKTVEKRKDTSQNFKINMKIII*HKRIYSMDLSSR*I*TKLTKKA*FGNKYVLIS*ISFFILMCSDKQHFCSPISES*MKFKPREKSIVWGL*GRPKVF*SKIH*SYFYRKSFYTDIVCGMQTINCSPLTCFFLLFLAFLSFVVIFKMSHMNWGTLAPKSSLS*SI*FPLPPHLKKKEKKERN*ITKSHLCQNLRPTCSTFVPGDLHKPRQD*STGVRAGK*KVLKVKIDPSPQKNPKSSNNSLREVSNYKEEEECAGDRKKGALVWPAGGAAGCGSPHPHPQPHGQRLWEAHGCPLALKR*CSHSDKVRLQGTK…	8.68674	9.27462e+06	417	24	8.66667
EMBOSS_075_3	3	EMBOSS_075	ENSMUSG00000097393	ENSMUST00000180524	Medium	[L].HSSTTARFHLGK.[K]	HSSTTARFHLGK	AGAGCGTCCGGGACAAGCGCTCTGTTTTGAATCTTTGGCATCTTCAGGGATGGATGGAATCCTACAACTGAGGGAGACTGCGGTCTTGGGCGTGAGCAAGTGAGGAAAAGCGTGCTGGAGCGACCAGCAGCAAACCTCCTCAGAGAGGGTTCCCGCGCGCGCTCCACACCTTTCCCAGTTGTGGTTTACACCCCACTGACTTCTCTCATCACATCCGTGTCTCCATCACCATCAGATACTTTTCTCAGTGCGTCTGAAAATGATGGGAAAGGCTCTCAAGCAGCCTAACGAGCACACTACCACCAGCACCCTTCACAAACTGAGCCCAGAACTTTCTTGAAGAAAGGATGCTGCTGGTCTCCCAGACCTTCCTGCTCAAAACCATAAGTTGGAAACACT…	SVRDKRSVLNLWHLQGWMESYN*GRLRSWA*ASEEKRAGATSSKPPQRGFPRALHTFPSCGLHPTDFSHHIRVSITIRYFSQCV*K*WERLSSSLTSTLPPAPFTN*AQNFLEERMLLVSQTFLLKTISWKHSATCCKILCFGHLHQILSSSSSTLNLGSNQQSLNWI*DMLTKRESMLCTRKLTNCPELVKSSVLTKNLQVTILLNQHNQTSD*STYGSAGTPRCPETFPSVFGAATWNHPESAFYMRPVCLTCTWDEVSICQI*DSLNHVLRGQSSRVGHKEWL*PSLVWSLSSFQRCMPSGRNGAQQGPPSLLSDISI*NLKVPPLPGHHQSHHHSSCSRWGQRQTTTA*PCAETPAPGSAPGANRTPSGFTATQKPCPGPRPLLGTEWCHGGDNG…	0.724679	409612350	932	50	17.3333
EMBOSS_100_3	3	EMBOSS_100	ENSMUSG00000096919	ENSMUST00000180684	Medium	[I].LSSVVNNSK.[N]	LSSVVNNSK	GGTCCAGTTACAAATTTCTTTGTAGCTAAAATCAATCGGTATGGAGGCAATTAAGGAAAGATTAGCAAACAAACTGAAGCTGCTTTTCGTCCATTCCCCACATTCCAAGCCAAGAGAAAAGGATAATAGCCTAAAAAGCAAATGGGAGCTGAAGCTGGTTTCTCCAACCTATCTGAAAAGTCTTTATGCAATCAGAGGGCTATTATTTCAGGAGACAGAGTGAAGGGGGCAAAAGATTCACGTTGCTAAGGAGATCTGCTGAAGCTGGCATTCCTACATAAATTTCCATTTCTATTGAAGGGAGAAAGAAAAGATATTTTTTCCAAAGTTTATTTGGAGCCCCTGGTTACCAAAGAAAGGCATTTTGTGGGTTTATTTTATCTTCAGTTGTAAACAACT…	SSYKFLCS*NQSVWRQLRKD*QTN*SCFSSIPHIPSQEKRIIA*KANGS*SWFLQPI*KVFMQSEGYYFRRQSEGGKRFTLLRRSAEAGIPT*ISISIEGRKKRYFFQSLFGAPGYQRKAFCGFILSSVVNN*S*KN*KA*VLTSCCQPVPFTKNQSTKKAFNRYSEVTAKKKPL*AQN*ISGRNLTK*TNFSYNKKRKTKKSRICVCVCVSARQH*KEKKKKKAPSRASLLHSLICAHSSS*RNRIQVAIVFSKKLEVGKFLGMGLWKWG*KQNKTKTKTRGSGRE*SHKVPLS**PQWLPPTLPRFPSAHNFHCLLNEAELSRQL*VTSSEKTEWKKGEFLTVGVKERKLRSNNGVAKKGKKIHQSLLTLGIPPQNLKGKYTHTHTHTHTHTHTHTH…	6.6073	3.02626e+06	error	41	14.3333
EMBOSS_169_3	3	EMBOSS_169	ENSMUSG00000114860	ENSMUST00000181053	Medium	[Q].RSQQCLAPAAPGEVR.[A]	RSQQCLAPAAPGEVR	AGAGGAACGAGGGCGGCGGGGACCACAGCTGATGAGGCTCCGCAGAGAGTGATCCCCCCCCCCCGAGTTGGAAAGCTAAGTGGACTGTCTCGCTAACTGGGTGGCAGAGAGGTATGGGTGTCCCCGGGGCTTTTACGCTTCGAAATGCTAGGGGACAAAGATCGCAGCAGTGCCTGGCACCGGCAGCCCCTGGGGAGGTGCGAGCATGGTAGCCCACTAACCATTCGGGGACCTGAGCGCTCACCTGGCCATCCATCGCAGCTCAGCGGCAGAGAATGCTGTCACCCTGCTTGTTCACGGCGCCGGCCTGGAACAGCAACCCAACACCAAGGGGAAAAACGGTTAGAGTGCGCATATCACAGTGTCGCCACCACCCAGGAGACGTCCTGGAAAACTAGG…	RNEGGGDHS**GSAESDPPPPSWKAKWTVSLTGWQRGMGVPGAFTLRNARGQRSQQCLAPAAPGEVRAW*PTNHSGT*ALTWPSIAAQRQRMLSPCLFTAPAWNSNPTPRGKTVRVRISQCRHHPGDVLEN*AGEQSPHPSPKLGKPPVMQGTLRRRRAPSPNRPRLRDQWITKPSRRLSVETGEAAVIP*EEQDHPYLAAPPPFPRCPGCPAKASHRVSVERGEWGPRRRDRTSPGRVERWRGRWRLSQQSRGFFLKVYIFVRLAMLKTNVKET*YEI*MLRCVYHQWIPNIPHL*EFTVRGQATFTR*TFRNSASQPKYTSSSRF*STLFKQ*QPRSLTCSLFHLKRN*VFLLTTTDVIYS*SLCIFLSCL*QLFLISMIGLQVNFRGGEACSGVE*…	1.24253	916954	53	32	11.3333
EMBOSS_074_1	1	EMBOSS_074	ENSMUSG00000092274	ENSMUST00000173672	Medium	[K].SRTGSGAGLGA.[W]	SRTGSGAGLGA	GAGTTAGTGACAAGGAGGGCTCGCTCTTGGGGCTAGTGGTGGGGAGGCAGTGGCCAGTTCAGGGCTCAGATGAGAGAGGTGGCAGAATTAGAGGCAGCCACTAGGATGGGGGTGCGAGGAGAAGCGGGGCTAAGTATAAAGGAGACTAGATTTTGGGACAGTGGACGTGTGGAAGGCAGCTTCCAAAGCGCCTTTAACAATCCACAAAGAACCAGCAGCTTTCAAGACCAGGCTATCCCTGCTGTCTGCTGGCACTTGACGTCCAGGAGGGCACAAGTTTCACAGGCCTACATGGGGGCAGTGTCCTAACTTGAGTGGCAGAGCAGCAGTTGATGGAGACGGGTGGACTGGGGGCCCTTGAAGGCCCCGGAAATCATAGAGGACAGGCAGTGGGGCAGG…	RS**QGGLALGASGGEAVASSGLR*ERWQN*RQPLGWGCEEKRG*V*RRLDFGTVDVWKAASKAPLTIHKEPAAFKTRLSLLSAGT*RPGGHKFHRPTWGQCPNLSGRAAVDGDGWTGGP*RPRKS*RTGSGAGLGA*WRSPLILTKPADPFFSR*GVVNPPGDEAWSYGRWT*LRWADSSGPGWYVIWVWPVCTHFGVRGEAGGGCRDKLFLLSGLPGGDHGD*RRKSWGHINHNFIFQIAVPSLDFA*VPCFLFCGLTLPYSCPSL*G*GVT*NLAPGSSGKPVEDVESVLESWARHFGKGGGHPDWAGRDGVDSQRAGRECGPWGGLTAMFPVTQMLHGRGLSL*CSPWQADGTRRYGAPASVSRSSAGGLTLEETAASVDAYTVNSRGLGSASLP…	3.29151	1.64687e+07	error	70	23.3333
EMBOSS_161_1	1	EMBOSS_161	ENSMUSG00000066057	ENSMUST00000182639	Medium	[W].RQGQADFVRGQPGLR.[S]	RQGQADFVRGQPGLR	CGGGTGGCTTGCTGCACGTTTGTTTCGGCTGTGCAGGCTTGAATGGTTCTTTTCGTCCTGCTTGCGTGCTGTGAAGGGACCTCAAGCAAGCTCCGAAGTTGAGACATGGCTACAATTGGGAAGACCATCATATTGAAGAACATTGTCAAAATTCTAGAAGACATGAAAGGCATGAAAGAAGTCATATTGGAGAGAAACCCTATGAACGTAATCAATGTGTCTTGCAATCTGTTCATTTAGTGCTTTGATTTCGGCTGTGAGTGACTCCAGCTTGGACTCATCTACCTTGTACAAGTCCTCTGCAGACAAAGCCCAATCACCTCATCAGAATCGACTCACAACGCTCTCCAGGTTTTCAGCAGCTTGTTCCCTCACTTCCCCAAACCATGGATGTGGCAG…	RVACCTFVSAVQA*MVLFVLLACCEGTSSKLRS*DMATIGKTIILKNIVKILEDMKGMKEVILERNPMNVINVSCNLFI*CFDFGCE*LQLGLIYLVQVLCRQSPITSSESTHNALQVFSSLFPHFPKPWMWQMLPCVLASFLFLLECPVALSLLKLSSTVPVAVCL*FLTEFPFLST*QNMSSRGQGFLFFITLCLVPDTWVHNI*VDSFMCLIIYTRRAWWQMSLIPALWRQGQADF*VRGQPGLRSEFQDSQGYTEKPCLKKKKIIYTHIK*FINYVHIRTK*IFLCVCYVHLCVMSLHVCT*KPMVEVVYLLQSLSSCDFR*ISLQT*RSLMWSDWLVRKL*GSISSTYLPSAEIMDTCRTCAFMCVGSRLRIHAC*GYTSLTEPCL*P*LLPS*…	0.824539	4511278	error	43	14.3333
EMBOSS_319_1	1	EMBOSS_319	ENSMUSG00000115092	ENSMUST00000227784	Medium	[L].RYSLSSSNETWFTSHK.[V]	RYSLSSSNETWFTSHK	GGTTCATCTATGAAGCAGCTGGCTCCAGAACCTTCTGCCTGCCTAAGGCCGAATAATGCTCTGCTTCTGAGTATGCTGACTTGGGTTGTCTGTTTACCTCACTGCTGGCTGCTGGCTGCTGTCCCCCTGGGAGCTCCCTGCTTGGCTGCTGTGGCTAATGCTGCCAGGAGGAGCAGCGCTGTTTTCTGTGGACCCTTGTCTAGTTGTGGCGGTTGCTGGGAAAGATGAAGTCCCCAGACTGGAGCTCAGGCTGCAAAGAGGCTGGCATGAAGCGAGATGCCCCTTCTAGGCCAAGGCAAGATCTGCTGCCCTCTGACTTCTACCTGTTGCTGAGATGACTTCTGTCGCCAAGGCACCTGGATACCGAGCCACTCCTTGACAAAAGCCCTCTCCAGCCTG…	PEPSACLRPNNALLLSMLTWVVCLPHCWLLAAVPLGAPCLAAVANAARRSVVQESLSSGPSSSSSGATSRSRRRTLGAVSTLLTDPVHHGSNDSRFPSLLCFLASTGPATTSPIWMLCKEEEWTLARTQLPPRGAWRDRFCKCLSAQSQV*NVASLELACWLPQMHHGRSSACSETVSSQEGISLLVWTRSCVCLCARARVCACARARAETKAVRDPTKTTHRFLG*AI*CAGNSIWHTGVVMAVGFITEAKTRGGGGRRRGAARGRE*FWF*SLLNLTKG*A*RMCLAAGTGRALRHHAEGAAVWLSPPTRSPSSAPCCPHTSSGPHPRLGVGWRGKRGFFADMYD*VTEKGP*PSKACNDTTLCLLLNTPDLEVTPAGLIYDMLM*LFQTPFFCLLS…	2.46079	3.1409e+07	error	10	3.33333
EMBOSS_222_1	1	EMBOSS_222	ENSMUSG00000098234	ENSMUST00000182580	Medium	[Q].KQMVKINIFNINK.[L]	KQMVKINIFNINK	TTTCTCGGCAGCGCCGTAGAGCGCGAGCAGACGGTGCAGCATGGCGCACAGCGGAGGCCGCGGGCGGCCGAACCCGGCGTGTCCTTGGGCGTTTCCAGGTGCAACAAAACCTGCTCATTTGAAGGTGCTTGAACAAATATTTTCTAAACACTTGTCATGGAGAGTGATTGAAACAAGCTGCCAGGACTACATTTGCCAATAACAAGCATGTAGGTGGCTGTAGTGGATGTCCAACTTTGGGAGCTGTGATGTCTAAAAACCCTTTATTGTTTTGGCTTACATATTGGAAGGTAAAATGAAGGCCATGAACAAAGTCAAGAAGCCATAAACAGAAGCAAATGGTGAAAATTAATATCTAATTTAATATTAATAAGTTATATATAAATAAACAGTTATTCT…	LSRQRRRARADGAAWRTAEAAGGRTRRVLGRFQVQQNLLI*RCLNKYFLNTCHGE*LKQAARTTFANNKHVGGCSGCPTLGAVMSKNPLLFWVQLTYWKVK*RP*TKSRSHKQKQMVKINI*FNINKLYINKQLFLIAVGSNFFKMSFS**NKLVFHX	4.40945	3159104	error	41	13.6667
EMBOSS_109_1	1	EMBOSS_109	ENSMUSG00000097154	ENSMUST00000180468	Medium	[L].SLSLSLGR.[T]	SLSLSLGR	GACTTGAGGCAGGAGCTGACCTAAGAGAAAACAGCCCGTGAACCCGTGCGGAGAGAGGCTGCTGGAGCTCCAGGACCTACATCTGCCTGGACTGTGTTCTGGAGGCATCAGAAGAGATTCCACCCAGAAGAATACATACTGGAAGGGACCACATCTTGAGAAGACAGCCATTCATCACATGGGACCCAACGTACCGGGGCTCAGAACACCCTCTTCCCAGGATGAAGGACATCAATGACCATCTGTTTCCTCTGAAGCAGACGGTTGGTCATGAACTTCCTGGTCCGGATGGTTACTGTGTCATTCATGATGGCTACGGCGCTGGAGCTGGAGAGCAGGTTCATTCTTTCTTGCTAAGAATGTAATAGGCTCACTCTAAAAATTATAGCCACATGGAAA…	DLRQELT*EKTAREPVRREAAGAPGPTSAWTVFWRHQKRFHPEEYILEGTTS*EDSHSSHGTQRTGAQNTLFPG*RTSMTICFL*SRRLVMNFLVRMVTVSFMMATALELESRFILSC*ECNRLTLKIIATWKI*GYVKTEWLETGWAAATLCPSYSHYSPCINLVRPTQRYMFAHSFRKQLGGDDH**NYG*QPG**P*K*EEG*NGKTLVKGKPWDPKD*HSLSLSLSLSLSLSLSLGR*TGGKANRLTDHHIIVQILSGLV*CFE*EWPS*VLVLEY*VSSW*NCLVRIRRRRLVIESVLLGGI*AFRSLCHTQFSLSSSLLPSFLPPSLSPLLYGCVSRCKPSAMAPCHACLPAAVPHAFPIMMVMGSFFETVSRKFPFVSCCGHGVFVMAIEK*…	33.1354	2.17337e+08	234	179	59.6667
EMBOSS_402_2	2	EMBOSS_402	ENSMUSG00000112294	ENSMUST00000220083	Medium	[A].AAGPVRTCHQPATPAHRSRPALR.[Q]	AAGPVRTCHQPATPAHRSRPALR	AAAATCTGCTGCCTGAGCGGCCGCCGCCGGACCTGTCCGCACCTGTCACCAGCCGGCGACACCAGCCCACCGCTCCCGCCCAGCTCTCCGCCAGCCTCGGGCCCCCGCGGGCCCCGCGACCCCGTTCCCTACCAGGTGTCCCCTTTCCGGAGCGAGGTTTTGAGCAGCGTCGCGATGTCAGAACGCTGGGTGTCCAGGTCCGCCGCTCCGCCTTCCGCCATCTTCTTCCACTAGCCGTAGCGGAGGCGGCGGCGACGGCGGCGGCACGCCCCGGAGCATTGTGGGAATGGCGTCCCCGGCCCCGCCCCGCCGGCAGATGAGTTGAGTGTGTGCCTGTGACAGCCTACTGTGGAGATCACAAGTCAACGTTGCAGGCGTCAGCTCTCTCTACTATGAGGG…	KSAA*AAAAGPVRTCHQPATPAHRSRPALRQPRAPAGPATPFPTRCPLSGARF*AASRCQNAGCPGPPLRLPPSSSTSRSGGGGDGGGTPRSIVGMASPAPPRRQMS*VCACDSLLWRSQVNVAGVSSLYYEGLRGSDLERIPCVPGCQCNRR*L*TYLICLLPPPQFWDVSAALGIKPRVSCLLCKHSSA*VLSLDPIKDFFF*KKK	4.24637	822082	8	175	58.6667
EMBOSS_307_3	3	EMBOSS_307	ENSMUSG00000112346	ENSMUST00000218379	Medium	[K].QNKPLNANIVPSPQELGTGMLSWRVPNELNPCLY.[S]	QNKPLNANIVPSPQELGTGMLSWRVPNELNPCLY	AGTTCACGAAAGTTGTCTGTCAGGCCGGGACCAGTCGAGTCCTTACCCAGCAAAGACCCAGGGACCCAGAGTGGCCGGGTACATCCCATCGCGCCTGGCTCACTCAGGCAGGGATGGAAGAAAGGCTTTCTGCCAAGTGAGCTTTGGTTACTGTCAGAAAAGGAAAGAAGAAAGAAAGGAAAAACAAAAACAAAAACAACTTACCAATTTGTTTGCAGTTGGGGCTGAAGTCAGCGGAGGTGATGGCAGCTTTGTGACCTTTAAAAGAACGTTCCAGAATCGGATCCTCCTAGGATGGAAAGTTGTTAGGTTTGAAAGCAGGTGCAGAATTCCAGCTCTCGACATCAGACGTCAACGTTGCCTGTCCCCCGGGATCGAAGAGGAGGACCCCGCAGCATC…	FTKVVCQAGTSRVLTQQRPRDPEWPGTSHRAWLTQAGMEERLSAK*ALVTVRKGKKKERKNKNKNNLPICLQLGLKSAEVMAAL*PLKERSRIGSS*DGKLLGLKAGAEFQLSTSDVNVACPPGSKRRTPQHQRAAREAWALQPG*EARALPQLPSGGVPTIGRNPQPRHQGEPPRDPPTAPSCRCSPKPPALFKPPW*F*RRRAAGTQPASPGASSASAPSAGISPGAALTAQPGHGVPLRGGERAAELRVSGLPPRPARLGVVPLLPVPPPKDDRLR*RRGPYQAGGHAGSGRRPGPWGTREGWGRGGTVRRPEPSDWSAGASRSLQQRRPNQSPRSRRGQTSPETPRARALPTAESLAGARRGGSAARAHSEPRELRR*RTTGLLSGSGLGLGERE…	1.23681	831668	error	114	38.6667
EMBOSS_192_3	3	EMBOSS_192	ENSMUSG00000097207	ENSMUST00000181374	Medium	[R].LEPQSKPQVTFCGCCEGRCTVIWCFDLLLAEDEGPKQ.[D]	LEPQSKPQVTFCGCCEGRCTVIWCFDLLLAEDEGPKQ	AGGCGGCGGTGCTCAGTGGTCGGTTACTGAGGGGCCTTGTGGCAACAAGGTGACATAGGACAAACAGCACTCAGGTGAGCACCTGGAAAAGGCTGTTGAAGCACACAGGCACTAGAACTACTTTATGAGCATAATTCCTTGGACCATAATCGTCACCTGAGGAAGCCGCGTGAGACACCAGTCTTAGGATTCCAAAGTGAAGAGGAACGTGCCCTCCTCGATGAACGCCTGTGGAAGCCTTTGAGCAGCCCTTTCATGGCGGAAGAGAGGGCAACTCTGAGGTGATGGAGCAGCGGCTAGGCAGAGGGCTGCTGAGGAAGCAGAGGGAGGATCGCTTCAGCTCTCGGCAGGCTGGAGCCTCAGAGCAAACCTCAAGTAACTTTCTGTGGATGCTGTGAG…	SPGGGAQWSVTEGPCGNKVT*DKQHSGEHLEKAVEAHRH*NYFMSIIPWTIIVT*GSRVRHQS*ALRCLQNLQILCFI*SKTKGVLELDTGGSHSLSKPLLSVLDPIALSHSSEKCHNGKWRSTMDEKLQ*HKRPEQEPSCTDLLNEGFFAT**TA*AAERSTLV*PFPEKAPPP*APQPPFQSEEERALLDERLWKPLSSPFMAEERATLR*WSSG*AEGC*GSRGRIASALGRLEPQSKPQVTFCGCCEGRCTVIWCFDLLLAEDEGPKQDLSQKLCCFGQEGGRLSGAEDGATSEALWLSPVPETAGLCIPHRHPCRLPSAESRSQGGSRRGLRHKPLK*TFKKNKIKEMESQDLS*F*CHYGFQVGLKFVTILGQFAAFRDSICMPLHPICIQKS…	6.81367	1.04439e+06	236	125	42.3333
EMBOSS_126_3	3	EMBOSS_126	ENSMUSG00000097026	ENSMUST00000180410	Medium	[I].IPLQPIR.[Q]	IPLQPIR	AAGGTATGAAAGAATGGCTTTAATTTAAAATTTTTTTCTTCTAGTGGCAGTTTTCTCTATACACAGTGTCCAAACACATAATTACATTCTCAGACTTTCAGAATCCTCTGACACTGGGTTGGAAGCAGATGTTCGGCCGTGCCTCCTCCCCATCCCATTGTTTAGCTTTCCTGCAGTTTATTCCGGGCGTGAACTCGGTGGTGTTTAGTAAGGGCGGAGCTCCGGCTGAAGTTTCTCCCACACTCCTTGCAAGCATAGGGTTTCTCTCCAGTGTGAGTTCTCTGATGGTCGTGCAAATTGGTCTTCTTTCTAAAGGCCCGCCCACACTCATTACACTCATAGGGTTTCTCTCCGGTATGCGTCCTTTCGTGCTGAATCAGGGATGAGCTTTGACTGAAG…	GMKEWL*FKIFFF*WQFSLYTVSKHIITFSDFQNPLTLGWKQMFGRASSPSHCLAFLQFIPGVNSVVFSKGGAPAEVSPTLLASIGFLSSVSSLMVVQIGLLSKGPPTLITLIGFLSGMRPFVLNQG*ALTEGFPAVNALIGFLASVGPLVLRE*RESTEGFPTLITFIGFLSSVNSMMLYKTCTPFKSFPTYVALIGFLSGMRQGLLTKKGLFRAVGILPSVEPLVLREVCNVTEVFPTVITMVRLYFSKQAFTLRKRSVRHKSQAEVVTLVRFASFMNPHMFIKGWALTKCPPTNAALERLLSCMGPLMLDKGRTPAKGLPTFLTLEGFLPTVGHLMLREGRAVPE*PPTEIAAIGLLSRVDSLVLNKR*TALEGFPTEATLIGLLSCMCVFMLTKG…	1.14267	4.52549e+06	error	6	2.66667
EMBOSS_336_2	2	EMBOSS_336	ENSMUSG00000109657	ENSMUST00000209848	Medium	[K].RGEERGGGILK.[R]	RGEERGGGILK	ACTGCAGCCCTCCATCTTGCAGGATCTTCCGGCAGCAGGGGTCCAGGCTGTCACTGATGAGTACTCTGCGCAGATTTATGAGCGAAGGCCATTGCTAGAGTCAGGCCTTAGAATCAGTTGCTCTGGGTGGGCAGAACCACTTAGTTCAGGAAACTGCAGACAGGGCTGGCTCCGGTGACTGGGCCATGTTACATTTTCAATAAGGTTATTTCATACCATTTTGTAGTTAGAATATGAAATGTATGTCCCCTGCAGGCTCCAGTTTTAAGTGCTTGACCCCTAAGTGTTGTAGAATTTTGAAGTCTTTGGGATCATAAGACATGGTGCTGGGCTGGTGGAAGTAGGACTACAGGAATGTACCAAACTGAACTCAACTGGAGCATACTAATAAGGAGTAAG…	LQPSILQDLPAAGVQAVTDEYSAQIYERRPLLESGLRISCSGWAEPLSSGNCRQGWLR*LGHVTFSIRLFHTIL*LEYEMYVPCRLQF*VLDP*VL*NFEVFGIIRHGAGLVEVGLQECTKLNSTGAY**GVRVKRGEERGGGILKRKSCYVK*TLNSLLV*DRILHEFKVQELLDTLRLFINFQQYLYICPSLSSIGETQKNKSFNVVRHX	3.93442	3.98451e+06	136	57	19.3333
EMBOSS_183_3	3	EMBOSS_183	ENSMUSG00000097417	ENSMUST00000181323	Medium	[R].KSFYTDIVCGMQ.[T]	KSFYTDIVCGMQ	CCCTTTTAGAAGCTATACATAAAATGGTGGTTTTCCTTCTGTACTGTCACAGAACTTATACATACATTCTCAGTCCTACCTGTGAAAGGCCTAAGGAGAAAGAAACTCAATTTGCAGTCCAACACAAAGGGGAGAATTTCTAAAATAAATAATCCAACAGTTTTTTGCATTTTTTTAAATTAATTTTTCATTTTTTTAAAATAAAATAACCAAAAAAAGTGTAAAGTTACAAAAATGTTGTTGAAGAATAATATATTAAAACTGTGGAAAAAAGGAAAGACACGTCACAAAATTTTAAGATTAATATGAAGATCATAATTTAACATAAAAGAATATATTCTATGGATTTGTCATCCCGATAAATATGAACAAAATTAACAAAAAAAGCATAGTTTGGCA…	LLEAIHKMVVFLLYCHRTYTYILSPTCERPKEKETQFAVQHKGENF*NK*SNSFLHFFKLIFHFFKIK*PKKV*SYKNVVEE*YIKTVEKRKDTSQNFKINMKIII*HKRIYSMDLSSR*I*TKLTKKA*FGNKYVLIS*ISFFILMCSDKQHFCSPISES*MKFKPREKSIVWGL*GRPKVF*SKIH*SYFYRKSFYTDIVCGMQTINCSPLTCFFLLFLAFLSFVVIFKMSHMNWGTLAPKSSLS*SI*FPLPPHLKKKEKKERN*ITKSHLCQNLRPTCSTFVPGDLHKPRQD*STGVRAGK*KVLKVKIDPSPQKNPKSSNNSLREVSNYKEEEECAGDRKKGALVWPAGGAAGCGSPHPHPQPHGQRLWEAHGCPLALKR*CSHSDKVRLQGTK…	8.68674	3.27027e+06	195	24	8.66667
EMBOSS_109_2	2	EMBOSS_109	ENSMUSG00000097154	ENSMUST00000180468	Medium	[Q].KCVFIPHR.[G]	KCVFIPHR	GACTTGAGGCAGGAGCTGACCTAAGAGAAAACAGCCCGTGAACCCGTGCGGAGAGAGGCTGCTGGAGCTCCAGGACCTACATCTGCCTGGACTGTGTTCTGGAGGCATCAGAAGAGATTCCACCCAGAAGAATACATACTGGAAGGGACCACATCTTGAGAAGACAGCCATTCATCACATGGGACCCAACGTACCGGGGCTCAGAACACCCTCTTCCCAGGATGAAGGACATCAATGACCATCTGTTTCCTCTGAAGCAGACGGTTGGTCATGAACTTCCTGGTCCGGATGGTTACTGTGTCATTCATGATGGCTACGGCGCTGGAGCTGGAGAGCAGGTTCATTCTTTCTTGCTAAGAATGTAATAGGCTCACTCTAAAAATTATAGCCACATGGAAA…	T*GRS*PKRKQPVNPCGERLLELQDLHLPGLCSGGIRRDSTQKNTYWKGPHLEKTAIHHMGPNVPGLRTPSSQDEGHQ*PSVSSEADGWS*TSWSGWLLCHS*WLRRWSWRAGSFFLAKNVIGSL*KL*PHGKYRVMLRQSGWRLGGQLLPSVPVIAITVHVLTL*DQPRDICLLIVSENNLEVMTINKIMGSSLGNSHKNERRGRMERRWSKENHGIQRTDTLSLSLSLSLSLSLSLSAGKQEERQTGSLTITS*YKY*VA*CSVLNKNGPHRFLCLNTRSPVGRTVW*GSGGEDLL*KVCYWVGFELSEAYATPSSLSLPLSFPPFFPLHSPLYFMVVSQDVSPQLWLHAMLACLLLCPTPSPS*WSWARSLKL*AASFLS*VAVVMVFLSWP*KSN…	33.1354	2.46365e+06	407	179	60
EMBOSS_138_1	1	EMBOSS_138	ENSMUSG00000097574	ENSMUST00000180974	Medium	[S].KCCVRSLDQNSR.[T]	KCCVRSLDQNSR	ATTCTACGGCCCGGCTCTGCTCCTGGCCCAGGCGCCCGTGTCCGGTGCGGTCCCATACGAGATGGGTTCTCTGCCTTCGGTGCGTGTCGGCGCCTCTGCCAAGGCGGAGCGGACGGCGAAAGAAAGGCCGAAAGCCATCGTGACGTCGAGGCACAAGCTCCACTGTCCTAACAGTAGAGGTCGCATGGAGTTCGTGAGACGGGCATTAGCTGCCGCTGGAGCTGTACCCAGCCCACCGTATTTTCACAAATTAGCCAGACAATACGCCTTCTCTTCGCATCACTACTGGTCCGGCTTCCTGTGGAGATTTTCAGATACAAGCAAACAAAACATTGCATAACTCTGTGTGCAGCCCTTACCCGGATGTGTGCAGCTTTAGGGTGTGCTTGCAGGAGGAAC…	ILRPGSAPGPGARVRCGPIRDGFSAFGACRRLCQGGADGERKAESHRDVEAQAPLS*Q*RSHGVRETGISCRWSCTQPTVFSQISQTIRLLFASLLVRLPVEIFRYKQTKHCITLCAALTRMCAALGCACRRNRISK*PPWKTMVKEHWDSDRTWVLSDPFIPHAHCPTCVYTCASACEHAGVHCRGHLPYLLSLFDLKKKNLFLQTPIYTCCLT*SQVWVTAISPNVHRNGKREGWTSGDNL*LGLLRSLLSLPRHLGLIGSNLV*EVCF*MHPWSTVNASQEIIFSSQFHGLILTYSR*VRMIPFLYSLEPIPLSLP*SREYPFFFFFSRQGFSVSPWLSWNSL*STLLINHA*RGIKGQDQSFSYLGFCTDSGSQSVCVRSPVYTKQVSRGHGQNC…	1.03044	4.38428e+06	437	62	20.6667
EMBOSS_023_2	2	EMBOSS_023	ENSMUSG00000087246	ENSMUST00000135767	Medium	[S].LNLRQDQPIRAR.[M]	LNLRQDQPIRAR	AGCCAATTAAGGATGGATTTTACAGTTTGAGTCTCAGGGTAACCTCATTTCCATATCTCTAGTCTTGATTTAGATTTTTAACTCCCTCTCACTTTGAGATTAAGCACCGGTTTGCAAAGGGCCCCACAGACTTCAGTGCATAAAACAGAGGACCCGCGCCTCCAGGCACTGGTAAGGAATCAATGGCTCCTTCCGCTCTTTGTCTGTGCGCTTGGCGCTGTAAGCTGCTACCTTGATTTTGGAGATTTGAGACAGAAGTTGGCTGCAGAACCTGTTATTGAGAGCAAAGATCTTTTGAATTACACTGAGAATCGGAGTCCTGCAGAAACTGAACCAGAAAAAAGAAAACAGACCGATCATCTGTTTGTGCTGGCTCTGCAAGCCAGGGTGCTGGCGGGA…	AN*GWILQFESQGNLISISLVLI*IFNSLSL*D*APVCKGPHRLQCIKQRTRASRHW*GINGSFRSLSVRLAL*AATLILEI*DRSWLQNLLLRAKIF*ITLRIGVLQKLNQKKENRPIICLCWLCKPGCWRERPEHFSC*EKVMGMKGGKRKKEPTKYQKTSYRELRKIISPELASYHSSLRSLDPQGHS*ILGLTGAHLWQKEPV*SLQSSLLRDGWVT*CSLTAEEVPSLDFSGIR*GYVWPGSPSSKNQSLNLRQDQPIRARM*TA*EYILHTAGPRKGPLPRSKTLSGISLPPSSQFLGIFILSL*EPATFSAPLGLCGINYTYDILNLDVSTPDSECTNLAWAE*LPRCREPSASGVRLPLDGMREWQKAGKAWQN*ETL*TRGPQPS*CYHP…	15.469	8855047	255	13	4.66667
EMBOSS_113_3	3	EMBOSS_113	ENSMUSG00000021268	ENSMUST00000146701	Medium	[K].QTNKQTTFI.[Q]	QTNKQTTFI	GACTTTTGGTAAATCACCTTTTGCCGTTTCCTTTGTCCCCGTGAAGCCCCCCCTGGCCGCCCCCTCCTCATTCTGGGCTGGCTGGCTGAGGGGGGGGGCAGCCTGAGGGCTGCGACGTGGCAGGTTTCTAGAATGTTCTATTGATGGCCGCAAGAGGGCGCTGGTGGCACTGCGGAATTTTGGGGGGCGGGGTGGGGAGGGAAGAGGAGGTGGCCTTTGTTCTCCTGCAGGAGGGGGTCGGGAGCGAGATGGGTTGCGGGACCATGGGTTCATTTACCTATGGGGAAATGTTAGTAGATACCTGGATTCACTAAGGTGCGCTTGCAGGACTTACAATAGGTCAGAGATGGCGTCATCTGCAGTGGCTGTGTGATTTAGGGTGTCATGGACGCAGATTAA…	KARLSTPQSASEDQTT*LTRKCLVNRPEIAKKKSLISQ*GCPYCPAASPSLSQQ*APSRCWVSLCSTNNFQNSNKQTNKQTTFIQQTFSETLTMCPVHQAMAEVQRQ*EQSLFGG*LVLSFLPALSLAF*TNHFCPDKTKKKKKTKTKNKTKQKTQKNKKQNNWVALGKPGLEWTMVSRPLKGADWIMRQMEAEGARRRQMQWAETRSELIRLIEGTFSVLPSGPGGLSLVHCCVHMETGATLVPLWQLFIHLMLTTPCPDPGPACHHAGKQRSPSGFRRGPPT*R*PRGLFGFSSSGHEPVSSLHPPVPLGTPGSTVLTWSPASPPPPVLLPRHSSVCLSFTAPASRGLSTLAAFLPHLQFPLQPTAS*LALLHRTALAQACRVFLCHLLLCSGSTSC…	6.90162	1.06079e+06	76	133	45
EMBOSS_289_1	1	EMBOSS_289	ENSMUSG00000112547	ENSMUST00000219127	Medium	[D].PSSGLAAAVFPRHPSSGLAAAAVFPR.[D]	PSSGLAAAVFPRHPSSGLAAAAVFPR	TTTTTCTGCCTTCTGCCCTCCTAAGCCTACGTAATAGGGCGTGGCTGTGGAGAGAGGGAGGGGCGGGGAGTTTGTTGGAGCTGAGTGCTTGGGAGAGGCACCGCTTCGGAAGGGGAGGAAATGATACACAGGATGAAGATGAAGAGGACGACGAAGAGGAGGAGCTTGAGCTATCTGAATCTGTTTCACTGTCCGAATCCGAGTCCAAGGAGTCCGAGGCCTGCAGCACTGGCGGCGGCTCCGCGGCGTTCGGGCCGGGGACGCAGACCCCGCTCGGCAGCGGCGGTCTTCCGCCGGGATCCGAGTTCGGGGCTGGCGGCGGCGGCGGTCTTCCCCCGGGATCCAAGTTCGGGGCTGGCGGCGGCGGTCTTCCCCCGGCATCCGAGTTCGGGGCTGGCG…	FFCLLPS*AYVIGRGCGEREGRGVCWS*VLGRGTASEGEEMIHRMKMKRTTKRRSLSYLNLFHCPNPSPRSPRPAALAAAPRRSGRGRRPRSAAAVFRRDPSSGLAAAAVFPRDPSSGLAAAVFPRHPSSGLAAAAVFPRDPSSGLAAAVFHRHPSSGLAAAAIFRWDPSSGLAASVFRRRPSSGLAEAAVFRRDPSSGLAAAAAPPAAGPPGAPEVAAKLPTPGLSHRT*ASAVARWPPPPPWRSPGRRAARGSPQKPS*PTRPR*NPSNEFLILGLLDLSG*I*EYKYNA*ALV*GHYKENSSNNVSM*LVVLGFSRVTELMDSLYIVKEFIDDLQSAVQFPTMVQ**L*MEVQGSSSYSIPNGKQERGKSETPCFQCPYIVSSRRCSPD*RCVPPH…	3.25395	1.50946e+06	115	121	40.3333
EMBOSS_221_1	1	EMBOSS_221	ENSMUSG00000097519	ENSMUST00000181949	Medium	[D].LNVISLR.[E]	LNVISLR	GGAGGAAGGACGTTTGTGGTTGGCGGACTCAGCCCCGGCCGGGAAGTTCGAACGGACGTGGAAGAGCCCGCAGGTTGGGCCCATGCACAGCAGCAGCTGCTCAGGGTCAGAGTTTCCTCGGGTTCTGTATAAAAGCTTTGGTTGACTGATTAGTGAAATAATCATATGCTGAAGAGAACAGGAAGTACTTGTGTTTAGAAAAAAAAGTAATTGCAGCAAATGCTAAATATCTCAAAGTAGGCTTAGTATCTCTAAGATAATTGAGGCCTTTGAGAAATACAAAAGAAGAACCGAAGAGCAAAGAAACAAGCTGAAGTAAGGAGAGCGCCCCACTCCCCAGTCCAAGATTTCTGCTGCCCTACAGGAGACATGTTCTTGGGAAAGCAGCATCTCTCTCAA…	GGRTFVVGGLSPGREVRTDVEEPAGWAHAQQQLLRVRVSSGSV*KLWLTD**NNHMLKRTGSTCV*KKK*LQQMLNISK*A*YL*DN*GL*EIQKKNRRAKKQAEVRRAPHSPVQDFCCPTGDMFLGKQHLSQFVVKDEIGNFCPVTSLLR*TTSPGGEDAQFLL*TKKAVLSGADMSHCQMMK*H*M*HFVDF*CF*RLYI*DNTLLVSSPKADVSTPLSSALFGIPLPLHELQMGKQKLELPAKLTRQ*MEMA*I*IFILRFTSKMARD*ITFLSLSFPIMKVIIVSVLCLTKPII*SSNV*HVLLSKSNSLLS*TS*HFLGSSVLKMCFSLFREF*LYIARWIIFNLIEPSMVGMGGGFWARIVLTLLRWEALLTVGSSFPGMASGLCKWRK*AGH…	0.861642	2.02864e+07	485	83	27.6667
EMBOSS_124_1	1	EMBOSS_124	ENSMUSG00000097526	ENSMUST00000180407	Medium	[K].KTMELVIK.[V]	KTMELVIK	AACTGGATGAGAAAAATGTCAGGGACGCAAGACACCCACCTGGGTTCTAGTGACAGCATCAAAGACAAAGAAATGACACTCCAGGAAAGAAGCTTAACTAATGGCTCTTGTCCTAGCTGACACCCCTAGAGGTTGTGTCCTTCTTAGGCAAGAGGATCGAACCAGGCCTATGAAGACCCCAAAGCCTGAGAATCCTGGCTCCTGACGACCTCCAGGCCACTGTGTCTTCGGGTCTGGACTGCAGAAGGGTTCTGTTCTACTCTCGGAACTCGAAGATCCTGGCCTCACCGTCCCTTCCCTAGCCCGAGCTCGGGGTGTGCAGAGACCCGCGAAAACCCGGCAGGTCTCCGGCGCGCTCGCCCGGGAGCAGGATCAGAACGCGCGTGCGCGCCGGGAGCC…	NWMRKMSGTQDTHLGSSDSIKDKEMTLQERSLTNGSCPS*HP*RLCPS*ARGSNQAYEDPKA*ESWLLTTSRPLCLRVWTAEGFCSTLGTRRSWPHRPFPSPSSGCAETRENPAGLRRARPGAGSERACAPGAPPPPFNRAAGK*PLTAPLLAAPPSHHLRDARCRSWVLRTHSPALRESSEASQSLRP*GAGSQPFPPLG*ERPVCACAGGGGAGRGGAGRAEPLDSRREREDWIKKGNPKGLFYVSRASALK*KTKTLWVFY*IIIRIKIELRENLQTYFPFQSSGLFQSLKWLVRKDVFYLGGSGEFDVWGGVLGCLSSYRHMF*SWQGIYRKLRIERSEINIPCSFRVTCAPVETMLFYEQIQDRAPKEKKKIISELSV*IEEIDIWVMRES*QK…	0.855458	1.01748e+07	413	7	2.33333
EMBOSS_206_1	1	EMBOSS_206	ENSMUSG00000097125	ENSMUST00000181920	Medium	[R].AGSGTPVATHPPMRGSLAPAHSP.[V]	AGSGTPVATHPPMRGSLAPAHSP	GTCGCGGTGGAGAACCCCGCAGTTGTGGCAATGCCGCACGGCCTCCAGCACCTGCCAGAAGAATCCTCGGGCCAGGTCCTCCTGTAGGGCTCCTCGTTCGGTGATAAAGTCGAAGAGGTCTTGCACCGGTTCGGGCCTCTCCAGGATCAGCACGAAACTATCGGGCCTCTCGAACCAGTCCAGAAGTCTAATGACGCCCGAGAAGTCCGAGCTCACCTTCTTCAACAGGACCACTTCCATGGGCACTCGGGTGCCATTGGGCTGCAGAGTGAGGGCGAGGGTTAGCGCGCCGGTTCCGGCACGCCCGTCGCCACCCACCCACCCATGAGAGGGTCTCTGGCTCCGGCTCACTCACCAGTTCTCCCCAATCGGAAATCCGGTCCTTCTCCACGTGCTTAA…	VAVENPAVVAMPHGLQHLPEESSGQVLL*GSSFGDKVEEVLHRFGPLQDQHETIGPLEPVQKSNDAREVRAHLLQQDHFHGHSGAIGLQSEGEG*RAGSGTPVATHPPMRGSLAPAHSPVLPNRKSGPSPRA*WPPGRRPPSLHQTLLLKASLRAPSPRRRCPLTGKLSATRMPE*TEPKPPLPNSGPTWYCDSRGSFSLPRKEARDTQRARPTRGSPGVPTTRAPRVGWGHSPGASLVACRSLQGAARRHL*NVDGQA*YLMPETPALRRPPASSRPACST*SKEASFSDSFYLEELRGDGRTVVRISLRGSPGMSEVHR*LLAACLSYGLASSQMQILKMHFSFI*EPLLPPPPGPTHYAWNL*C*AILPMV*HIVSPVKGRAGTHHEILAQQNTCP…	16.3996	5.07984e+06	97	31	10.3333
EMBOSS_106_1	1	EMBOSS_106	ENSMUSG00000097340	ENSMUST00000180381	Medium	[Y].QHCKASGVRLGK.[T]	QHCKASGVRLGK	CATTTCAAAAATGTCAAATTTATATTACCAGAAGTATGATCATTATATGTGTTGTCACGTGTAGTCACTGTAATTACAGTCATTCATGCTAGGGCAATGGTATGGAGAGAAATCAGAAAGACAACAACATGATTTTTTATCATCAAGAAATTAAATTTTATCCTTTGGAAATTCTACAGTCTATAGATAAGAATATTTTAGTATAGTCTTTAGTTGGAAGAAATTTAAAAGAAACAAAGTGACGGTTTAAAATACCTTTACGGTTATATATCTTAATAATGCTTATAAAGTCTGTGTTTACCTCAGGTCTTTGCATTCCTTGAAGAATAAAATGAGAAATGTTTAACTCATGAAAATGCATTTCTAACATAGTCTTTAAAATCTTTTCAAAGTGCTAAG…	HFKNVKFILPEV*SLYVLSRVVTVITVIHARAMVWREIRKTTT*FFIIKKLNFILWKFYSL*IRIF*YSL*LEEI*KKQSDGLKYLYGYIS**CL*SLCLPQVFAFLEE*NEKCLTHENAFLT*SLKSFQSAKSIIILMLGHTKILNTSLN*KLMCTFITFLLNGFKQYKNYKGSSI*CISKWQIIYCQSTIKKCFLQVSSQKTVLNLSISK*LFSSRKHGKQIERGTCHQIL*DKVFPLTSASCKHTCKLNPENTIVVHTDCNNYCD*KNRSCERKE*PKRSEKLEKKSRGIAHTGVHISGTTGIGGGSRKSRREQGYP*AQQKDCSLTK*LWNSEEQNGRGRNISSLM*TTHIEIINIYQMKSIYIRKVLVSV*VYNFSSRL**SNILDMNFLYKP*…	1.53639	409612350	584	11	3.66667
EMBOSS_106_1	1	EMBOSS_106	ENSMUSG00000097340	ENSMUST00000180381	Medium	[S].SRLSNILDMNFLYKPNATLMLR.[L]	SRLSNILDMNFLYKPNATLMLR	CATTTCAAAAATGTCAAATTTATATTACCAGAAGTATGATCATTATATGTGTTGTCACGTGTAGTCACTGTAATTACAGTCATTCATGCTAGGGCAATGGTATGGAGAGAAATCAGAAAGACAACAACATGATTTTTTATCATCAAGAAATTAAATTTTATCCTTTGGAAATTCTACAGTCTATAGATAAGAATATTTTAGTATAGTCTTTAGTTGGAAGAAATTTAAAAGAAACAAAGTGACGGTTTAAAATACCTTTACGGTTATATATCTTAATAATGCTTATAAAGTCTGTGTTTACCTCAGGTCTTTGCATTCCTTGAAGAATAAAATGAGAAATGTTTAACTCATGAAAATGCATTTCTAACATAGTCTTTAAAATCTTTTCAAAGTGCTAAG…	HFKNVKFILPEV*SLYVLSRVVTVITVIHARAMVWREIRKTTT*FFIIKKLNFILWKFYSL*IRIF*YSL*LEEI*KKQSDGLKYLYGYIS**CL*SLCLPQVFAFLEE*NEKCLTHENAFLT*SLKSFQSAKSIIILMLGHTKILNTSLN*KLMCTFITFLLNGFKQYKNYKGSSI*CISKWQIIYCQSTIKKCFLQVSSQKTVLNLSISK*LFSSRKHGKQIERGTCHQIL*DKVFPLTSASCKHTCKLNPENTIVVHTDCNNYCD*KNRSCERKE*PKRSEKLEKKSRGIAHTGVHISGTTGIGGGSRKSRREQGYP*AQQKDCSLTK*LWNSEEQNGRGRNISSLM*TTHIEIINIYQMKSIYIRKVLVSV*VYNFSSRL**SNILDMNFLYKP*…	1.53639	1.27242e+06	error	11	3.66667
EMBOSS_116_2	2	EMBOSS_116	ENSMUSG00000097173	ENSMUST00000180581	Medium	[K].GSDNFKGTLRDGEWASP.[L]	GSDNFKGTLRDGEWASP	GAGGGAGATGAGCTGCAGCTGCAGCTAGGATGCCTGTGTGGAAAGTGTCTGCTAGACACAGAACACAAATAGTTCCTGCATTTCTAAAAGGCCCAACTGCCGCGCTTGGCATTAGTGAAGGGCAAGATGCTGAGGAAAAGGGACAGCTCTAGGACCAGTTTGGGTGTGTGAGAAGTTAAACTTCCACCGCAGGAAGCAGGAAGCAAACGTAGCAGGTGGGATAGCAAGCTGGTGGAGGAGGGGCTGCCACAGGCGGGTGACACAGACAAAGCAGGAAACTCCGAGGGATCTCCCATGGAAGCTGAGCATCTTGAGGGCAGATGTGCTTACCGCTAGTCCCAGCCGGTGGGATAAAAGGTCATTTGGTAACCTTCCTGCGACGTTATCTTCTGGGAAGAT…	REMSCSCS*DACVESVC*TQNTNSSCISKRPNCRAWH**RARC*GKGTALGPVWVCEKLNFHRRKQEANVAGGIASWWRRGCHRRVTQTKQETPRDLPWKLSILRADVLTASPSRWDKRSFGNLPATLSSGKINKFTVNCPRKD*VQEGTDGKA*MQIHCRTRVPAGSS*YTWSHWLQASLLSTEWSHWRLVESWQVLTPLAVGLCLAVPSVL*GSRTGRA*PDWLRPSATELEPPAVLLLIHLL*YATTCLRLNRFSKIFRS*LRTVILLN*EFLLKG*SDNFKGTLRDGEWASPLLYKACSLTLKLNLI	1.2178	73826574	error	8	3
EMBOSS_196_2	2	EMBOSS_196	ENSMUSG00000097305	ENSMUST00000180839	Medium	[L].LRSEEAGCVQARLR.[V]	LRSEEAGCVQARLR	CACGCAGGCCGCGTGGCTGGAAAGGATCTCCTGATCTCTGAGGGTCTTCAGGCTCTGGAGCTCAGTGGGAACTCTTTGGACAGCAGCTCCGGAGTGTGCCACCCATGGAGTGATCAGCACCGCGGGCCAAGGAGGAAAGAACCGTGTTGGGGAGTGTGACCCAGACGGGCCAGCTGATGCAGAGCCCGGTCTGCAAAAGGGGATGTGAGCCCACGTGCTGGAGCACTGAAGAAGGAGCTCACGTGCTGGATTCCACAAGTCCCTTGCCCCGAGGGGCGGCGCCTGCGTGAGGCAGCACCTTCAACCCTGCCCTCGCCGGGGGACTCGCGAGTTAGCAGCCGGCCTGTTGAGGTCAGAGGAGGCGGGGTGCGTCCAAGCCTAGCGACTGCGCGTGCTTAA…	TQAAWLERIS*SLRVFRLWSSVGTLWTAAPECATHGVISTAGQGGKNRVGECDPDGPADAEPGLQKGM*AHVLEH*RRSSRAGFHKSLAPRGGACVRQHLQPCPRRGTRELAAGLLRSEEAGCVQA*RLRVLKALEQRTSERPEQPQPVTPPEPRATTAFPAWGGGQMRGALHPERATLSAATWTTERPCSLCSSPRTSRSGYGKSSRSTADKAPR*SAALWASGKQWSFSADCRQSRLSISSITTELWEQSRGTQRLNTCLQHPRHPTSESHIRLHSPCLYHPPSSQLASNSTVSPNRSYWSQCLKAVNSIMSSFALVESVGVALCWDSVPCQFL*KLAFSPLSFFVVLEMNLGP*IYKVGSLPLSHVLYCPPILRSLRVLRFLLHFLLSCFLDSPFF…	1.12412	5390142	error	105	35.3333
EMBOSS_215_2	2	EMBOSS_215	ENSMUSG00000097410	ENSMUST00000181125	Medium	[K].KEKEEQAMMAQRPQ.[T]	KEKEEQAMMAQRPQ	TTTCTTTCTTTCTTTCTTTCTTTCTTTCTTTCTTTCTTTCTTTCTTTCTTTCTTTCTTTCTTCACTTATTTACTTAGACAAGGCCTTGGTTTGCAGCCTCAGGTTGCCTCGGATTTCTAGTAATCTTCTTACTTCCAAAGTGCTGTGATTACAGGCACACAAAGCTACATTCACTTTGAATGTCTGATGCTTTTAACACCCCTGTGCAGAAAAGTGACAGGTGTGTGGGTGTGCATTAGATAGTTGTGCTCAGTGAATGGGCCTAGAAGTGAAGGATCACAGCAGCAATGAGCACCCCCAGATCTTTGTTTCTAAATAGTGGTCTCCCCTATATAGGAAGCCAGAACTCATTGAAGAAATGGCTGGTGTTAGGACCAGAGCAGGGAAAGTGGAAAAAAA…	FFLSFFLSFFLSFFLSFFLSSLIYLDKALVCSLRLPRISSNLLTSKVL*LQAHKATFTLNV*CF*HPCAEK*QVCGCALDSCAQ*MGLEVKDHSSNEHPQIFVSK*WSPLYRKPELIEEMAGVRTRAGKVEKNKQVLKPELCQRVKESATGT*EPRWVSQSLRYEDMLGGEVHIFNPSTQKADLG*TVSSRPT*ATQRDFFLIFFSFFFMVSRDRVSLCSPGCPGTRFID*AGLKLRDSPASASQVLGLNLCQSLFSFKFTFIFMRAYVPVMVWYGCQRTFGSCFSASTIRKLRD*SQVARLGSKCRKN*PT*QPHSEISSQ*KQKTKKENSL*ILSYNSQEQTQENMFLV*R*IIHRQE*VPCTRFD*VGTVFNKAPLAPSAGVSCGMV*MKLLAYPI…	6.739	33721.1	error	180	60.3333
EMBOSS_056_2	2	EMBOSS_056	ENSMUSG00000089726	ENSMUST00000134140	Medium	[K].LMVSRVTGTHDTR.[V]	LMVSRVTGTHDTR	CCTAGTCATACACGTGGACCTAGCAGCACCCGAAGCATTGCCCAAGGATACTTGCTGAGAAGGAAGTTTGCCTGAGTGGTATCTGACAATGTGGAGGACAGAAGAAAGGGATTGCTGCCTGGTCAATGTGAGGCTTTCCTCTAAAGGTAGTACCAAGTCAGACTGCCTTCCTGATAACAGGTCTCATTTTGTAGGACCCTTATTGTGTGTTTTTTGGGGAAGCCTACTGTAAAAGCCAACATTTTAATGGGATTGTATCTTATATTTCTTTAAGGAGTTTTTTTTTTTTTTTTAAGGCTTACATGTGTCCAATTTGGAACTTCTGGCTATTGGCTCCTCCCCTCCCCCCCTTGGGTATAAGCTGTAATTGATGTTTGTGACAGAATTTAGAGCTTTGGC…	LVIHVDLAAPEALPKDTC*EGSLPEWYLTMWRTEERDCCLVNVRLSSKGSTKSDCLPDNRSHFVGPLLCVFWGSLL*KPTF*WDCILYFFKEFFFFF*GLHVSNLELLAIGSSPPPLGYKL*LMFVTEFRALAFSFLSNYLFQI*QE*SEPHLGTEAVTSQNNVKVLTVQVVMCASTAVRALVALC*QLPRWEPQWALPRAALAASSRRSVGRGEGLLVLRAFCSKVHLVQIVK*TSIYCPKCSFWHKKLCPHPIQVKQACRGLSIVVFAALC*FCIVALQEECSCANLCKTDGGLLFTSSVVFF*TNFVFLLCRCRACVVCVM*QLL*H*SAYSAGSV*PSTALRALKVLPAVELQPRLAIAQPTVLLLSTGLWLVLQVCIQLYNILLCKSMQN*LWW…	4.07231	725551	616	89	30
EMBOSS_235_2	2	EMBOSS_235	ENSMUSG00000086859	ENSMUST00000182811	Medium	[L].RSGGFNTLR.[F]	RSGGFNTLR	ATTTGCAGAGCTGGTTCCGCCGGGGAGGAGAACTCGCGTGCTCCGTGCAGAGGGGATGCATCCTGCGCAGCGTGGCTCGGGGGCGCCGTGGAGCCTCCCGAAGGCGATCGAAATGAACCACATCCCCCAACGACTAGACGGAAGCACGCACAAGCTCCTTCCTCCCGAGGAGCGTTTCCAGTGACTTGAGCTTGGTTGGCCCAGGTATGTCAATCCTTGGGGGTGGGACGGTGACCTGAGGCCGACGGTCTGGGAAAAGGCTCCTGTGTGGCTGTACCCGCCCGAGGTGGGTGCAGCCCCGTACCAGACAGCCCGACCTTGACCTAAAGTAAAATCCCAGAGGAGGAGGAACCTCTTCCCTGGGGTTAGAATTTGCAGTAACAGGTGTGGACATCCTAG…	VPPGRRTRVLRAEGMHPAQRGSGAPWSLPKAIVGFRNLSRDSHGRRLTPGRHAIAGWAGVVGRP*ARAAIGGALAASVLQAPHGFVRLHRIVLNCLFISPPRK*TTSPND*TEARTSSFLPRSVSSDLSLVGPGMSILGGGTVT*GRRSGKRLLCGCTRPRWVQPRTRQPDLDLK*NPRGGGTSSLGLEFAVTGVDILAAVWWSCMILQTGALLKLWGLSTVLQKQIFDHYSSPSL*IKKRKKTYSLFYFILECGCLPGAPKGSQEGTRFPRSGIIEYCQPRCGCWELNPGPLRGQQVFSFNAEPSLQQLHHPALR*GLT*PRLAFTH*VAEGSL*TSNPPSSASGSRLDDRHPRAHVVYGMYG*SSRLYAC*EVFYSWVSVPPTWSLNKDAYSCDSRR…	12.109	1.42755e+06	error	56	19
EMBOSS_075_1	1	EMBOSS_075	ENSMUSG00000097393	ENSMUST00000180524	Medium	[K].LTQLFEKY.[L]	LTQLFEKY	AGAGCGTCCGGGACAAGCGCTCTGTTTTGAATCTTTGGCATCTTCAGGGATGGATGGAATCCTACAACTGAGGGAGACTGCGGTCTTGGGCGTGAGCAAGTGAGGAAAAGCGTGCTGGAGCGACCAGCAGCAAACCTCCTCAGAGAGGGTTCCCGCGCGCGCTCCACACCTTTCCCAGTTGTGGTTTACACCCCACTGACTTCTCTCATCACATCCGTGTCTCCATCACCATCAGATACTTTTCTCAGTGCGTCTGAAAATGATGGGAAAGGCTCTCAAGCAGCCTAACGAGCACACTACCACCAGCACCCTTCACAAACTGAGCCCAGAACTTTCTTGAAGAAAGGATGCTGCTGGTCTCCCAGACCTTCCTGCTCAAAACCATAAGTTGGAAACACT…	RASGTSALF*IFGIFRDGWNPTTEGDCGLGREQVRKSVLERPAANLLREGSRARSTPFPVVVYTPLTSLITSVSPSPSDTFLSASENDGKGSQAA*RAHYHQHPSQTEPRTFLKKGCCWSPRPSCSKP*VGNTLQRAAKSYVLDIFIKY*AAVVVHLTLAVTNSP*IGFKTCSPRGKVCCVLEN*PTAQSL*SQVS*RRTYKSPFY*TSTIRQVTNLPTALLAHPDVLKLSRVCSEQPLGIIQSLPST*DLSVSPVLGMKSPYARYRTP*TMSCEASLVELVIKNGCDQALYGHCPHSKDACPVEGMGHSRAHPVCSVTSPYETSRSLPCPVITRVIIIPPAADGDKDRQPQPDPVQKRLPLAQRPVPTEHLQDSQQRRNHVQDPGLCLERNGVMAETT…	0.724679	10180049	error	50	16.6667
EMBOSS_220_2	2	EMBOSS_220	ENSMUSG00000098001	ENSMUST00000182891	Medium	[R].KSQRLTDL.[L]	KSQRLTDL	AGTGGTTCTTTAGACATGGAATGGGACGGATGAAAGCTGTAACCCACGTTCCCATGGCCACTTCCCAGTGGCCTTCTCTGCTTCTAGAGTCTGAAATAGAGCTGGCAGCTCGGCTTCCCATGAAGTGAGTGAGAGGCAAGGGATGGAATGCAGTTGGTAAGATACACCAAGTCCTCGCTAAATCCTTAACAGCTCATATAGGGTGTGCTGGTACCTGCTTATCATCCCAACCCTGGGGCTGAAGAGGTAGGAGAAGCAAAAGGTTATCCTTAGTTACACAGTAAGTTTGAAGTCAGCCTGGGCTACGTGAGATCCTGTCTCAGGGCAGACATGGAGGTGAGTACTAACAGAGGAAAGGGAAGAACAGAGGAGCAGGAATGGAGGAGGAGGGGAAAGGAA…	VVL*TWNGTDESCNPRSHGHFPVAFSASRV*NRAGSSASHEVSERQGMECSW*DTPSPR*ILNSSYRVCWYLLIIPTLGLKR*EKQKVILSYTVSLKSAWAT*DPVSGQTWR*VLTEEREEQRSRNGGGGERKEEEEGRRGEGRRGGRKKGKN*RQASIARGPLSFPASFQLLCNSGQVPKGEIPRKSQRLT*DLLGRHCWP*DGVELGQHWSSVYLHLPHFLLYGFPNNAFGVL*YVILPY*IYLFQNSFLHNFIHITVMSMQCQKQRQIQKCQDILNRDKFTRFSSFNDSNLPCNLHILVAWLKQMLNLL*ESKLLTFCFVLYIRQGLSMQP*VFWNLLCRPDWP*LITNF*LSQLIAHSKSVYLSPCLLLCVAYRMNAGEKGCIELKRSQGWAESK…	1.92346	1.09809e+06	error	16	5.66667
EMBOSS_079_2	2	EMBOSS_079	ENSMUSG00000097404	ENSMUST00000180505	Medium	[R].GGKGYFLGPQLELQ.[S]	GGKGYFLGPQLELQ	GGCGTAGCCCCGGCCATCTCAGCTTCACAGCCCCTTGCTTCCTTATTTTAAGCCTGAGTATAGAAGTTTTAGAGGAATGAGGACCCAGTTCCTTGAAGCCCAGGCTATGAGAAACCGGAGGGAAGGCCTCGTCTTGGAAGAGGACCCCACTCTGCAGGCATCTTGCCCGAAGCGTTTCATAATCCTGGCCCAGGAACTGAAAACTCCACGCACTGATGCCTTTCCACAAGCTGAACATCAGAGCACTGGACACTGGCCCAGCTACAGCGGACAGGTTGAGCTGAGCGCCTGGGTTGAGCTGCTTCCGGACCCTTAACCCTCAGGCAAACACACAGAAGACCTGAAGCAGGGGCTGATCAGCGACAGCCCCCTAACCCCAGAAGCAGTGGCCTGGGTCAA…	A*PRPSQLHSPLLPYFKPEYRSFRGMRTQFLEAQAMRNRREGLVLEEDPTLQASCPKRFIILAQELKTPRTDAFPQAEHQSTGHWPSYSGQVELSAWVELLPDP*PSGKHTEDLKQGLISDSPLTPEAVAWVKQS*SGHPTSYLGKGSLGDCCGPWGWLPWWQLRAGPNQEERSSLPSSLPSSPPSSTAPRPWSLPPWSSTYARGSYPAPSRLSLISPATLFYYLLLRVSFSPLPPPPSSADSKPALREDKLVNGRVVSREEPVAGPGEKGWTGTEGHRRPERG*GKGYF*LGPQLELQSRRPHPMSPSGKVLGTIRLSDAANTVLHPPPAPPRASGLQLSSSPAGARRSRDYLWWLQLLAGAAPGWMRADFCRTLDKRHLDTPKVKS*LRLTFAPGRY…	1.83643	4.84084e+06	error	77	26
EMBOSS_169_3	3	EMBOSS_169	ENSMUSG00000114860	ENSMUST00000181053	Medium	[R].RLSVETGEAAVIPEE.[Q]	RLSVETGEAAVIPEE	AGAGGAACGAGGGCGGCGGGGACCACAGCTGATGAGGCTCCGCAGAGAGTGATCCCCCCCCCCCGAGTTGGAAAGCTAAGTGGACTGTCTCGCTAACTGGGTGGCAGAGAGGTATGGGTGTCCCCGGGGCTTTTACGCTTCGAAATGCTAGGGGACAAAGATCGCAGCAGTGCCTGGCACCGGCAGCCCCTGGGGAGGTGCGAGCATGGTAGCCCACTAACCATTCGGGGACCTGAGCGCTCACCTGGCCATCCATCGCAGCTCAGCGGCAGAGAATGCTGTCACCCTGCTTGTTCACGGCGCCGGCCTGGAACAGCAACCCAACACCAAGGGGAAAAACGGTTAGAGTGCGCATATCACAGTGTCGCCACCACCCAGGAGACGTCCTGGAAAACTAGG…	RNEGGGDHS**GSAESDPPPPSWKAKWTVSLTGWQRGMGVPGAFTLRNARGQRSQQCLAPAAPGEVRAW*PTNHSGT*ALTWPSIAAQRQRMLSPCLFTAPAWNSNPTPRGKTVRVRISQCRHHPGDVLEN*AGEQSPHPSPKLGKPPVMQGTLRRRRAPSPNRPRLRDQWITKPSRRLSVETGEAAVIP*EEQDHPYLAAPPPFPRCPGCPAKASHRVSVERGEWGPRRRDRTSPGRVERWRGRWRLSQQSRGFFLKVYIFVRLAMLKTNVKET*YEI*MLRCVYHQWIPNIPHL*EFTVRGQATFTR*TFRNSASQPKYTSSSRF*STLFKQ*QPRSLTCSLFHLKRN*VFLLTTTDVIYS*SLCIFLSCL*QLFLISMIGLQVNFRGGEACSGVE*…	1.24253	2.07627e+07	error	32	11.3333
EMBOSS_082_1	1	EMBOSS_082	ENSMUSG00000097658	ENSMUST00000180595	Medium	[S].QQPHGGLQPSLMRSDSLFWK.[C]	QQPHGGLQPSLMRSDSLFWK	ACAGTAGGTCCATCCTGTCCCTCTCAGGAGACTTCGGACACTCGCGTCACTAGCTGTTGCTCCCACCACAGCAGCTGGGAGTGAATCGGGGTGAGCAGGCTTTGCCCGGATCCCAGAACTCTAGTCCGCTTTGCCTCTGTCAGGCGGACGGTGAAGTGTGTCCGCTCTTTCTGTTTGGGGACGTCTTCCTCCTCGGCCGCCTTAGGGTGTGGAAACAAAGATGAGCCACACCAGGCAGATCTTTCACAGGACCTCTCCCCGGAACAAGACATACTCTGTGCCTCCCTTTGCCATCCTCTACGGCGGTGTCCCTGTGTGCTTTTGGAATTTGTGAGACAGAGTCTACTCTGTGTAGCCCTGGATATCCTGGAACTTGTCCTGTAGACCAGGCTGGCCTCA…	TVGPSCPSQETSDTRVTSCCSHHSSWE*IGVSRLCPDPRTLVRFASVRRTVKCVRSFCLGTSSSSAALGCGNKDEPHQADLSQDLSPEQDILCASLCHPLRRCPCVLLEFVRQSLLCVALDILELVL*TRLASTQICLLLPPECWD*RCASLLPGSFYIS*RL*LMGLGRCLSCKFEDLKWIPGAHEKEMRHSSLCL*PSTDKEHNRTQGPTGYPA*PYQQVPGRGKERV*K*GCVPPLPGFSHSKFKYPLEGWRDGSAVKSTDCSSEGREFKSQQPHGGLQPSLMRSDSLFWKCLKTATVYLHIINK*IF	0.968146	1.75824e+06	275	221	73.6667
EMBOSS_300_2	2	EMBOSS_300	ENSMUSG00000116384	ENSMUST00000230786	Medium	[K].DPQTAQVPPILTCQRYR.[M]	DPQTAQVPPILTCQRYR	GTTGATGACTTTGTTGTTTCAAGCCAGCTGATACTGTAGCCAGAGGACAAACACCTGCAGAAGTTCTCTTATGGCTAACAGTTACTTTTGGCTCTTAGCTAACCACATGAAAGTGCTGTGGAGAGAGACGCTGGGGCAGACCAATACTGAAAAAGGAATGGAACAACTTCAGCTGATCTTGTAAGGCTGAATAGCTGAAATCAGAGCCTTCTCTGCCTCCCACTTATGTAGTCGCAGATCTGAATGCCACCTTGGAAGACTGGCCACTGTTCAGGACCTTGAAGATTCAGCCTGGATCCTCCCAGTGTAGACACCAGAGCACCAGAGGCATCAGGGCTCGAATCAACCCTCCCACCCTGGAGAGATGTCTGAAGCAACTCCTTAGTGGAGTCTCTCTCT…	LMTLLFQAS*YCSQRTNTCRSSLMANSYFWLLANHMKVLWRETLGQTNTEKGMEQLQLIL*G*IAEIRAFSASHLCSRRSECHLGRLATVQDLEDSAWILPV*TPEHQRHQGSNQPSHPGEMSEATP*WSLSLSSW*LAIYPVVKIRQNLGLFPISPHPAFQLREH*RDSFLLLFIPSIYSFSAQESTL*FQYIELGDTGSVRTLQGTEG*LWFLEYVSYPKCLDFLNLKILCIFMESMEKMEAPMQIHKPEILASLRRGSPFLGLCPRGPEKC*SSKSKEVTGS*LLFCSCWVGPKQTSNH*RPVICNQICT*GLLAIFKPVFISKPDVLQIVSQPCFL*LCFFSCSSAYLKHTKKLTRSWWISDACFNAPCFARAAGLIFF*FQYFPLFLSIRLV*I…	0.986698	1.56751e+06	error	5	2
EMBOSS_307_1	1	EMBOSS_307	ENSMUSG00000112346	ENSMUST00000218379	Medium	[R].EAGWDLERE.[R]	EAGWDLERE	AGTTCACGAAAGTTGTCTGTCAGGCCGGGACCAGTCGAGTCCTTACCCAGCAAAGACCCAGGGACCCAGAGTGGCCGGGTACATCCCATCGCGCCTGGCTCACTCAGGCAGGGATGGAAGAAAGGCTTTCTGCCAAGTGAGCTTTGGTTACTGTCAGAAAAGGAAAGAAGAAAGAAAGGAAAAACAAAAACAAAAACAACTTACCAATTTGTTTGCAGTTGGGGCTGAAGTCAGCGGAGGTGATGGCAGCTTTGTGACCTTTAAAAGAACGTTCCAGAATCGGATCCTCCTAGGATGGAAAGTTGTTAGGTTTGAAAGCAGGTGCAGAATTCCAGCTCTCGACATCAGACGTCAACGTTGCCTGTCCCCCGGGATCGAAGAGGAGGACCCCGCAGCATC…	SSRKLSVRPGPVESLPSKDPGTQSGRVHPIAPGSLRQGWKKGFLPSELWLLSEKERRKKGKTKTKTTYQFVCSWG*SQRR*WQLCDL*KNVPESDPPRMESC*V*KQVQNSSSRHQTSTLPVPRDRRGGPRSISGQRERRGHYNPAERLGHCPSFHPEGSPPSGGTPSPGTRASRRGTRPPHRAADARRSLPRSLNLPGDSDAGAPREPSRRVPEPAPPQPRAPGSLREQRSPLNPGTASRSGEVSELRSSGSRGYLPGLPDSAWFPSSRSRRPRMIGSGSGGDLTRPEAMRGADGARGLGGPGRGGDEGGPCGARNRQTGVRALPGHYNNGGPIKARAPGVARRAPRRRARARCRQPRAWRERAAGGPPRAHTASPASFGGSGLPGCCREAGWDLERE…	1.23681	1.37651e+07	391	114	38
EMBOSS_151_1	1	EMBOSS_151	ENSMUSG00000097811	ENSMUST00000180790	Medium	[I].PALHPNDTCKIQYK.[T]	PALHPNDTCKIQYK	CACAGAAACCATGTGACTCGTGTTTATTCTATAAAGATCAGGAGATACACAAATCCAGCAAACTCCCACCGACCAGCAGAGGACCACTTTCTTGGGATCTGCTTCCTGTGTCCGTCCACATGAGAACACACGCTTTGTCTCAGGTGAGAAGGGGCGAGCCCTGCCTGCCCAGTGTCTAGCCTCTGGCCAGCTGTGCAGCTCTGCCAAGCCTTAGACACATAACTTACGTCGGACCACATTTTGCACAGATTCTGAGGTAGTCCCAGTGATGTCTGCTTGGCTCCTCTCCTGCTCACTGCACGTTAGTGTCCTCGGTTGGTGTGACCCCCTGACCTGCTGTAACTGACCCGTACATGAAGCTGGCCTGTGGAATGCTCTCCCAAGTAGGACCCTGAAGGG…	HRNHVTRVYSIKIRRYTNPANSHRPAEDHFLGICFLCPST*EHTLCLR*EGASPACPVSSLWPAVQLCQALDT*LTSDHILHRF*GSPSDVCLAPLLLTAR*CPRLV*PPDLL*LTRT*SWPVECSPK*DPEGWAYVPQQRHTEKVLAMARPELLEATS*KS*YTQHKEGGNFLSCARHTGRRLHHR*V*ALLMRACPAPQAR*LQCLSSLLKWPLTKGT*VCVQANSLF*LIN*IN*RQGFSV*LWLS*NSICRPE*SGLHRETLSQTHTRD*DTEIDRGRQTAPCDISRA*WDIFPQRWKRFWSLTPQPRRHDG*RWAGSGP*PEWQEHTQKRRHPTIQGS*SLEIRLGRDLARPARGTGPGAESPSGLTAARCTRARSALTFPIFPGGFRLLATPP…	2.89779	1.15162e+07	560	11	3.66667
EMBOSS_349_2	2	EMBOSS_349	ENSMUSG00000113902	ENSMUST00000222608	Medium	[Q].PLVERRSESEQSR.[A]	PLVERRSESEQSR	GGAGACTGTCACAACCGAAACCGCGGGAGCGCGTCCGGGCGACACCGGGCCGACGCGGGAACCCATCCCCTTGAGGGCCTCCTCCCAACCCGAAGGCTCCTTTCCGTCTCCCGTCCTCACCTGCCAGGCCAATCTCCCCCCGGCACCGTCCGCCGCCCTTCCCAACCCCTAGTGGAACGCAGGTCGGAGAGCGAGCAGAGCTAGCGCGCGCTCAGCGGCGGAGAGCAGCCGGCAGGAGCCCCTGTGTGGTGGCCGCCATCTTGGGCCTGAGCAGAGCGGCTGAGGCGGGGACGACCCGGGCGACACCATCTGTAGGGGTGGTGACGAACCGGGTCAGGGAAGAGGACAGCGCAAAAGCTCGCAAACCTTGTCAGCCTGGATCCACGTCTTATTCAAAAC…	G**LCPKAIIFASPKPSTVLEAIEINVLNALNPPYREFPQGSDFDYLCFISNIYQILAFSRMIVHAEVN**EIRKDGSGLVLGLTVGEVSL*SFRNHGDCHNRNRGSASGRHRADAGTHPLEGLLPTRRLLSVSRPHLPGQSPPGTVRRPSQPLVERRSESEQS*RALSGGEQPAGAPVWWPPSWA*AERLRRGRPGRHHL*GW*RTGSGKRTAQKLANLVSLDPRLIQNVSRSFTA*DVRDSRVRREREAPVCRRHPLSSGLARR	18.4557	584696	error	425	142
EMBOSS_290_1	1	EMBOSS_290	ENSMUSG00000084799	ENSMUST00000188602	Medium	[D].KVQISTSHRWK.[K]	KVQISTSHRWK	GGACTTAGGGAGCTCGGCTGCTACTGCTCCCTCCCTGGGCTTCGGCAAGAGTCTTTCCCTGTCTAACACGAGGGAACACACGGAGAATTTTAATGTACACATGCAAGAACAAAAGCCTGTGAAGCTGGAACGCAACTGTAGCATTAAACAGCGGTGCCTCAAAACGTGGATTTGTACCAACTAGAAGAACAACATCTGCTTCTTCCACACCAGCAATTGTGGTATTGAGAAGATAATTGGAACGAAAACGATAGCTGAGAACAGTTGTAACACTCATCTTCAATCCAAGTACTTAGGAGGTAAAGACAGAAAGTTCTTCTGCTACACAGAGTTCAAGGCCAGCCTGGGCTACAAGAAACTCAAAAATCAAAATGAAATCCCAAACAGCAGCCTGGAGCA…	ETTTFLPSWRQRREGPRGEVHRLQPDKVQISTSHRWKKAHT*EKAGKKQKGGRVLRGGECFCTF*WKEIFTRHRTHGEF*CTHARTKACEAGTQL*H*TAVPQNVDLYQLEEQHLLLPHQQLWY*EDNWNENDS*EQL*HSSSIQVLRR*RQKVLLLHRVQGQPGLQETQKSK*NPKQQPGAQLTASHPAPSVGKISSVHKLSESTLLSKSFRATKASASTKPPAI	6.53928	2.26406e+06	27	93	31
EMBOSS_364_2	2	EMBOSS_364	ENSMUSG00000106237	ENSMUST00000197762	Medium	[R].ARSVAVGAAAAVALEGAAPR.[P]	ARSVAVGAAAAVALEGAAPR	GGTGGCGACGCGGGGGAGCCGTGCCTTAGGTTGCGGGCTGCAGCGGGGAGCGGCGGGGGGTGCGGGGGTCGCGGCGGGTCGCCGTCGGAGAGCGCGGTCGGTGGCGGTGGGAGCCGCGGCCGCGGTGGCGTTGGAGGGGGCGGCCCCGCGTCCGTGTCACGTGGTACGAGGCGGGCAGCCATCTTGCTACAAACACAAACAGAGAGGAGCGGCCGCCGCGGGAGCGCCAGCGCCCCCCCCCAGTCCCCCCCTGCCGCCGCCGCCGCCGTCCCGGCCCTCCGCGCCACCCGCCCGTCACCGCCGCCGCCGCTGCCGCGCCCGGGTCACCAACGCCCCGGGGGACCGGGAACCTCGCGCCCCCCCCTCCGATTCCTGGCGTCCTGCAGCGGATGGCGACTG…	VATRGSRALGCGLQRGAAGGAGVAAGRRRRARSVAVGAAAAVALEGAAPRPCHVVRGGQPSCYKHKQRGAAAAGAPAPPPSPPLPPPPPSRPSAPPARHRRRRCRARVTNAPGDREPRAPPSDSWRPAADGDWRGTLVQPPAQPVIKNPRIPPGHCLSFLLX	2.47934	2.41425e+06	31	390	130.333
EMBOSS_108_2	2	EMBOSS_108	ENSMUSG00000078706	ENSMUST00000150490	Medium	[P].MTEGSGNLRSTACFDLVLK.[L]	MTEGSGNLRSTACFDLVLK	AGAGGGCGCCAAAGGCGACGCGCTGGCGGCCAGCTCCAAGCCAACCAGGCCCATTGCGTCCGTCTGCAGGAACCTGTCCCTTCACCCTGCTTTGGACACTGAGCTTCGGAGGATCTGGCTGCGAGCTGATTCAACGCCAGGGCGCCGCCTAGAGGTCGGTCGCGTCCTCGGTCTCGCTCACCGACCACAGAGCTGCTTGTCCAAGCCACAGTGTCAGACTTAAACAAAACAAAACAAAATTCCTGCTTGGATCAGAGACTTGGCTTCTGGGACCGTTGACTTATCAGAAACTTGCCTCCTCTCTGCTTCATAACGAACCCCAGGAAGAGAGAGGGACCAGGGATCTCAAAGAAATATTTGTCCTTGTGGCACCGACTAGGTGGAAGAAAAGTCTCAACA…	EFSRSSKRRRRHHSRHCSRGLKAWRRWPGADSRVTANLVPRHFRISQRMEDSAVPREGAKGDALAASSKPTRPIASVCRNLSLHPALDTELRRIWLRADSTPGRRLEVGRVLGLAHRPQSCLSKPQCQT*TKQNKIPAWIRDLASGTVDLSETCLLSAS*RTPGRERDQGSQRNICPCGTD*VEEKSQHVSFF*GS*ILCLGLHWFVSLPRLLSLTSFSSSCQDDALTSRRKGTWKSYPFLLKIHYKISR*FGDGHVLEKNLENICVCVCVCVCVCVCVCAVIGKNCPHSLYLLSKLPLVSQQ*SRGYLETPVALPREVCAEPLKADF*DKDDLGRHPTNRVEVSLKSMQASFWRLRSKA*VVELQSLQECVLRECVYTQGMLS*RCTSSVFQGAPVSS…	1.34239	5.52204e+06	710	399	133.333
EMBOSS_190_3	3	EMBOSS_190	ENSMUSG00000097347	ENSMUST00000181811	Medium	[K].KANQIGLTCLLQ.[Q]	KANQIGLTCLLQ	AGTTTAATGTATTTTAATAGCAAACTTACAGGAACAGCACAGAAGACTGACAACATTAAAAACATGTACTTGTATGTAGGACAACTCAGTTAGAAAAGTATAGTGAATGGATGGAATCTACTGTGTGATAAAAATGCTACAAACACCATTTAGTTGCCGTCAATAAGAAATTTACTTATTTTAAAAAAATCCAAATGCTGGCATTGTCCAGAAAATTTTAACAGGTTTATTTATAATTGTTATAAAGTTGAACTGTTGAAATGTGTTCACTGAAACATTTTGCTTGCATTAATGCTTTCCATCTTGCATTTATATTAAAAATTCACACACAAATGAACGTGGAGAAACGCCAATACCTGATTCTGTCCCCTATGTTTCCACTCGCAATCATATACTTAG…	FNVF**QTYRNSTED*QH*KHVLVCRTTQLEKYSEWMESTV**KCYKHHLVAVNKKFTYFKKIQMLALSRKF*QVYL*LL*S*TVEMCSLKHFACINAFHLAFILKIHTQMNVEKRQYLILSPMFPLAIIYLGTFDPMEKISNIQNY**QEEEEKKFF*E*NVSPHSGLLSTFSAYAAC*LDIFWHNCYTFGMDSTQIGIFKKANQIGLTCLLQQ*KRNDLVVLFPTVKIHLHSKTL*RIYQTLT*KPVKMPKFTKFSTASQNIKTLQYSKC*HAP**TNGLKETNKS*RPHPYQRKCIGTHH*GSPGSRNGPHVYLLLPLWNAED*TQDLVPIGLLPAPKCFLPDP*RVICRTLSNVEPTVTL*DPSGYFLILPTT*TC*LYEPPIDTHQVM*KGKRT…	6.13846	4.96081e+06	203	7	3
EMBOSS_057_2	2	EMBOSS_057	ENSMUSG00000064263	ENSMUST00000079720	Medium	[M].ERNQLAEK.[A]	ERNQLAEK	TTTCAGAGATGCAGTGACTCTGCCAGATGCTTCAGTGTCTCCCAGGAGGCAGGTTTTGCAGTGCATGGAGAGGAACCAGCTGGCAGAGAAAGCAGGTTCAAGCTCAAGCAGCAATCAGATCATGTAGAATGACCACAGCCAAATGCACAAGCCCATTTGAGAAGCAAGGGAATGTCTTGTGTGATCCCAGAATCCCAGGTCCCGGGAAGACAGAAATGTTGCTGAGACCCCGTGGCAGCTTGGGTTCAAGCAAGACAAAGCTGCAGCCAACAGGGCTGCCATCTTCTCACTCTCTAAAGGAATGTGAGAGGGTGACCACCCTACAACCCAGGGAAATGGGTTCTTGTTCTAGCCTGGTGTTGGAGAATCACTCTCTGCATCTGGCCTGACACCAGCCAT…	FRDAVTLPDASVSPRRQVLQCMERNQLAEKAGSSSSSNQIM*NDHSQMHKPI*EARECLV*SQNPRSREDRNVAETPWQLGFKQDKAAANRAAIFSLSKGM*EGDHPTTQGNGFLF*PGVGESLSASGLTPAIHLQQQGNQEISWPAWPASEWNMQRR*LTADQHGRP*SRGQIAICFIKFVGGCRIYVCDLCLGVTMSLGRFGRLLNV*FVDX	1.66145	1.60767e+06	23	9	3.33333
EMBOSS_187_1	1	EMBOSS_187	ENSMUSG00000097445	ENSMUST00000181462	Medium	[K].KMSSEFHTVAVAQTHT.[K]	KMSSEFHTVAVAQTHT	GGTCGCCATGACCGGTCCCGCCCCGCTCCGCCAGTGGCCAGACCGGCGCGGGGAAGAACGAATGACAAGACGTAACACGCCTTTAGAAAGATGGCGGCGCGCAGGCGCGGGTTTCCCTTGGCGCTTTCCGGCCGCCTGCTGCGGAGAGAGCATCAAGGTTCCGCCCTACCCGTCAGGAACTGGCCAGCCCAGGTCTTGCCTTTCAGAATTCTCTAAGAACAGGACATCAGCATGAGTCCCTGGGATGAGTCATCAAAATAATATCTGGAGGAACATGAAGAGTGTCTGGAGGAAACTAAAAAGCAACAGCATGGGTTTATTTTAAAATATTTTTTCTTCTTACTCCTCTTCCTCCTCCTCCTTCTTTTCTTCCTTTTTTTTTTTTTTTTTTTTTTTTGA…	GRHDRSRPAPPVARPARGRTNDKT*HAFRKMAARRRGFPLALSGRLLRREHQGSALPVRNWPAQVLPFRIL*EQDISMSPWDESSK*YLEEHEECLEETKKQQHGFILKYFFFLLLFLLLLLFFLFFFFFFF*DRVSLCSPDCLEIAL*TRLASNSEVYLPLLSKYWD*KCVPSPPGQFFFNLLIYFMYMSTLSLSSDTPEDPITDG*EPPYGC*ELNSGPLEKQPVL*TAKPSHQFPNSSS*PGYERSSGRGIKFY*R*E*N*TIVGFMVEQMLNMLMFTLNKFDVHL*NNKNQTY*NSPQHLHLT*YCFPVGVTQPYCCPTDL*AGSSEKLAGIMELLKLNRAVPLVLSRKE*APFSSL*PQCLQTNHSKDKYSDV*ANKVLPRAGREELAAAQHFS…	12.1532	2.10958e+07	633	8	2.66667
EMBOSS_299_3	3	EMBOSS_299	ENSMUSG00000108621	ENSMUST00000188038	Medium	[K].EILMTMREGLQ.[V]	EILMTMREGLQ	CGGACACGGGTACGAGTGGGCCCCGCTTTCGGCGCTGGTACCAGGAGCTCTGAGAGGAACGTGGGCGAGCTCGGAAGCTGCGCCATGGATCTCGGGTTTCCCAAGTTGGCCTCAAACTTTCTCTTAGCTGAGGAGGACCTTGAACTTCTGATCCCGCTACCCAAACCCACCTCCAGAGTGCTGGGATTAAGGGAGTTTTTGGCCTTTGAGGATGTGGCTGTGGAGTTCAGCCAGGAAGAATGGGTTTTGCTGGATCCTTCTCAGAAGAAACTATACAGAGATGTGATGCTGGAAACCTGCAATAACCTTTCTTCAATAGGCATCAAATGGGAAGACAAGAACATTGACGAGCAGTACAAACACTCTTGGAGATTCCTAAGGGGACAAACCATCTGAACA…	VVCRFSVADTGTSGPRFRRWYQEL*EERGRARKLRHGSRVSQVGLKLSLS*GGP*TSDPATQTHLQSAGIKGVFGL*GCGCGVQPGRMGFAGSFSEETIQRCDAGNLQ*PFFNRHQMGRQEH*RAVQTLLEIPKKLHDRCNL*AQRRWSVSRNLYLDTRFP*EY*HFY*SKTI*MWCVWKSFHVSFIL**AHHVSLRGQTI*TQTWFMWNTATKSEC*KIL*TVWNGLRLPLFAFYRWKNQQ*R*MLQM*TIQ*SSEFFQFPPES*NSLWCRKNL*V*RVWKIL*T*EFLFITPINSHWKEIL*M*TMREGLQVSQLSSVT*KLSY*RKPLRM*TVWKNPLFSQFPSSS*KDSQWRKTLCMQAV**NFQMSKLPSNT*KNSHRRKVL*L*TMW*SFQKS…	3.54781	2.41462e+07	error	85	29
EMBOSS_290_1	1	EMBOSS_290	ENSMUSG00000084799	ENSMUST00000188602	Medium	[R].QKVLLLHRVQGQPGLQ.[E]	QKVLLLHRVQGQPGLQ	GGACTTAGGGAGCTCGGCTGCTACTGCTCCCTCCCTGGGCTTCGGCAAGAGTCTTTCCCTGTCTAACACGAGGGAACACACGGAGAATTTTAATGTACACATGCAAGAACAAAAGCCTGTGAAGCTGGAACGCAACTGTAGCATTAAACAGCGGTGCCTCAAAACGTGGATTTGTACCAACTAGAAGAACAACATCTGCTTCTTCCACACCAGCAATTGTGGTATTGAGAAGATAATTGGAACGAAAACGATAGCTGAGAACAGTTGTAACACTCATCTTCAATCCAAGTACTTAGGAGGTAAAGACAGAAAGTTCTTCTGCTACACAGAGTTCAAGGCCAGCCTGGGCTACAAGAAACTCAAAAATCAAAATGAAATCCCAAACAGCAGCCTGGAGCA…	ETTTFLPSWRQRREGPRGEVHRLQPDKVQISTSHRWKKAHT*EKAGKKQKGGRVLRGGECFCTF*WKEIFTRHRTHGEF*CTHARTKACEAGTQL*H*TAVPQNVDLYQLEEQHLLLPHQQLWY*EDNWNENDS*EQL*HSSSIQVLRR*RQKVLLLHRVQGQPGLQETQKSK*NPKQQPGAQLTASHPAPSVGKISSVHKLSESTLLSKSFRATKASASTKPPAI	6.53928	7.2642e+06	152	93	31
EMBOSS_321_2	2	EMBOSS_321	ENSMUSG00000114953	ENSMUST00000223609	Medium	[T].ENILENGKIK.[Y]	ENILENGKIK	GGAGGAGGCCAAGAAAGCCCACCACATGCGTTGGCCCCGGCTGTCGCACGGCACCTCCATGGTCACCGGTATGATGAGCGCATCCATCTTGGGCTCGTGGACCGAGGACGAGGAGGAAGAGGAGGAGGAAGAAGAAGAAGAGGAGGAGGAAGAGGAGGAGGAGGACGCGTCTAGGCTGAGATGGTTCGCGTGGATATTGCTGCTCATTCTAAGACCGCTGCCTCCGCCGCCGCCGCCGCCGCCGCCGCTGCTGCCGCCGCCGCCGCCGCCACCGTTTGCCATAGCTAGCAATGGGCGGCAGGCGCAGGGGCTCGAGGGAGCTCCTCCCGCCGCCAGCGCCACCCCGAACACCCATCAACAGCCATGTTGCTGCTACTGCTGCCGCTGCCGCCGCCGCCG…	EEAKKAHHMRWPRLSHGTSMVTGMMSASILGSWTEDEEEEEEEEEEEEEEEEEEDASRLRWFAWILLLILRPLPPPPPPPPPLLPPPPPPPFAIASNGRQAQGLEGAPPAASATPNTHQQPCCCYCCRCRRRRGAPGGGRGGAWARGAVRDLAGCAEIYTAKRRRPPSPGLPAGPGGGGDEGGWLPLPDPGPDRPRGCAEHREPRGRRGRSAPGVCASRSSVSAIPRTLGAARPAWRAPRVCAAPGPGVSRPSPHSSLG**GDSSLGSENPRPPDRACPRHPSSPGLRSAPGSPPPVLAGPRQVGCGGLPCLRGQLADALRDPFGPGLCDPELPRPPLASSSLPPRAPPRPRSRSPSLFGARPARPAAASSGSCSNWSGRGLKQPEAGGEEAYRANSPR…	1.12412	7.02149e+06	error	26	9
EMBOSS_194_1	1	EMBOSS_194	ENSMUSG00000097379	ENSMUST00000181390	Medium	[R].QGLCNLGSPGTHSPDQDDLKLQSTCLPPCLAMFLFTYQT.[G]	QGLCNLGSPGTHSPDQDDLKLQSTCLPPCLAMFLFTYQT	AGACAGGGTTTGTGTAATCTTGGCTCTCCTGGAACTCACTCTCCAGACCAGGATGACCTCAAACTCCAATCTACCTGCTGATTGCCACCATGCCTGGCTATGTTTTTATTTACTTACCAGACAGGGTCTTTCTACATAGCTCTGGCTGTCCTCAAAGTGTGTAGACCAGGCTGCTTCCTGAGTGCTTGGAATTAAAGGAAGGCACCACCACCCCGGCTCTGGGCCAATGAGAACGGCACCAAAAGACCCGCTGCTGCTCGTCTACCCATTACTGATTCATCTCCACTCCAGAAGTCTAAAGAAACAGAAGACGATCAGTTTCACTCCAATGGTCAAATAACTGTGTACTGACTGTCTCAGGTGATCCTAAAGCCAACTCACCAATGTAGTAAAAGCCCA…	RQGLCNLGSPGTHSPDQDDLKLQSTC*LPPCLAMFLFTYQTGSFYIALAVLKVCRPGCFLSAWN*RKAPPPRLWANENGTKRPAAARLPITDSSPLQKSKETEDDQFHSNGQITVY*LSQVILKPTHQCSKSPSVTD*RRKERTTDCIKLFYYLLHVNPESEDTGSSTTHKAQDKTLKTKTTTHEKSSLCLPSAGIKGVHLHAWLKTLSFNVLHASQISILYLENQVNFLRQV*KEYEKITFLRISLLLLCQILNVSEQPQNCNRNYY*LFFTLFFCVYMHPCVYTCVLKPEASIYSLPLPLPILFV*DRVCLSLNLVTVNKLQEFSCLHLFVVS*QTYLTTSS*LFMCAFGIQCHSG*LSFNIIMSHSIQNKTF*FTNNI*ILIHLEK*SNLS*VYSV…	1.54922	2.54891e+06	error	53	17.6667
EMBOSS_240_2	2	EMBOSS_240	ENSMUSG00000097928	ENSMUST00000181702	Medium	[R].LSPFLLAAGP.[A]	LSPFLLAAGP	GCACTCAATCAGGGCGATCCTAGGCTCGCACGGCGGCTGTCCACCGTTTCCCTCCGCCCACCGCGCCGACGCCCGGGCGCCCACGCCACCCTTTCCCCGACCACCCTCTGCGCAGCCCGGGCCCAAGCGGCGGGACGCAGGCTCTCGGACCCGGAGCCGGTTCCCGCTTCTCTCGCTAGAGGGCAGACGGGGCCCGCTCAAAGCCCTCAGACCGAAGGGCACGCGCAGCCGGTAGAGATCCCGCAATCGGAGCCGCACTCCGGGGCTGGGCTCCGCGACCAACGTGGGGTCCGAGATCAGAGCCCGGGAGCGCGACGCACGGCAGACCCAGAGGACCCGGGAGGAACGGCCAGCAATCTCGGGGTGCGCACAGCGCACGGGCACCAGGTGGAGGCGGCG…	HSIRAILGSHGGCPPFPSAHRADARAPTPPFPRPPSAQPGPKRRDAGSRTRSRFPLLSLEGRRGPLKALRPKGTRSR*RSRNRSRTPGLGSATNVGSEIRARERDARQTQRTREERPAISGCAQRTGTRWRRRRHGSSGTRLGAKRAARGHTGRG*VPAWEQRSGWHSPGLGSPSAGAGFPRDPRSFFLPFPLPLPSLRSDISLKMSALRGPGWATVTRDKFGPRACRKVCPGREEPVAGLRGGVACRLQGAAWTRSPGAPATSGGVSGLLLCPGSCRCRLWSGLAPVAVSLPYSPKRERCSQSGLCSHLPAAAAAALRSAPAAGAARSSHKFWGSPSRLFFNCPQVGRRRLLRTLPLASPPPSFPTTPPPRGADTPPGGA*AGRSRLSPFLLAAGPA*…	1.41752	3.88063e+06	388	617	206
EMBOSS_237_2	2	EMBOSS_237	ENSMUSG00000097764	ENSMUST00000181077	Medium	[K].ISTSNKGHSLEIME.[K]	ISTSNKGHSLEIME	AAGGAAGTGAAGCATCTGTGCATAAGCAACACACACGCACATGCGCGCGCACACACACACACACACACACACACACACACACGCGCGCGCGCGCGCGCGCGCGCACGCACACACAGATGCGTGTGCACACGAGAGCAAGAGTACCGATGGCTCTGGCACCGAATCTAGCCTCCCCTCCACCCTCTGAAACTTCAGACCTTCCAGTTCCACATCTCAAAAAGGTATATGGGGGAGGGTGTGGTTCTCAATAAAAATAAGTACCTCTAACAAGGGACATTCCTTGGAAATTATGGAAAAGCATATTCTCCTGAGGAAGCCCAGGCAGGCAGGGCTCAGAATCAGGGAAGCCTTTGGGCAAGAAGGGCTTCTGGGCCTTGGAGAGGCAGGTTCAACCATGCC…	RK*SICA*ATHTHMRAHTHTHTHTHTHARARARAHAHTDACAHESKSTDGSGTESSLPSTL*NFRPSSSTSQKGIWGRVWFSIKISTSNKGHSLEIMEKHILLRKPRQAGLRIREAFGQEGLLGLGEAGSTMPKHQD*GK**GGAAAPVTFSLQTQAQPQRGRRKILFILVLKKNF*KL*KRNRNSSVGITAI*AQRAL*LQRGRQWVTLTVPVPASSCHPSSQRKELPPSTSTPTPESHCTAKTQAHMHTHSRGPCQLGLLQAPLLATGNPVAQPNLQERNQPGPTGTHMMDSHRLFSSSFRELESPVGPGR*NSHQHHMHRARLVSFSLGFPWYTVD*SSGREEAGPEGLPGASCQTLGLNPPTMLPWVPKWQVCRGLPRVFGF*EGEVCMRRWLMR…	23.6141	2.86071e+07	85	41	14
EMBOSS_384_1	1	EMBOSS_384	ENSMUSG00000114688	ENSMUST00000225131	Medium	[W].KTQQENSNISK.[C]	KTQQENSNISK	GTATTCTGTTGCTGATGCTCGCATCTATGGTTCCAGATTTCTTTCCTAAGAATACACTCGGCGTGGTTCCGGAACCCTAGAGTTACTCTTAAACCAGGCTGTCCAAGATGTACTGCTCCATCTGAAAGTCAAGGTCCGTGCCACCTAAGTGGGTTCCCGCAGCAAGGAATTTGAGGACATCCTCCTCCTTCATCTGCAGGACGTCAAGGGCTCCGGACATTGTCCTGGAAGGAGCTGAGCACATCAAGAAGGGCTGAGCACAGTATCCAAGCACAGGATGCTGGCAGATGGCTGGAGAGAGGACTGAGGGATGCTGAAGAGTGGGAAGACTGTTTTGAAACTGCCACATGGCTTATGATGGGCGTCACTAGGAAGGAGGAAAACACTAAAAGAGCAAGA…	VFCC*CSHLWFQISFLRIHSAWFRNPRVTLKPGCPRCTAPSESQGPCHLSGFPQQGI*GHPPPSSAGRQGLRTLSWKELSTSRRAEHSIQAQDAGRWLERGLRDAEEWEDCFETATWLMMGVTRKEENTKRARKEK*LYC*DGICTSDTSCCSLTEKLVYQIPELQGKLPFHRWKTQQENSNISKCQVTPAPQMWGSFTAVTLKIIVFH*KLETSSLSPHPSSQALGFAKSQLP*QW*KGVRRPSSSQGLLPGTAVLLLWHFLCTKDSPALSGKSETRQSCERAHEGCALQALAVVSFCVCCLFIYLFPDQ*KLSAX	19.5528	38310882	175	15	5
EMBOSS_053_1	1	EMBOSS_053	ENSMUSG00000021268	ENSMUST00000129245	Medium	[P].LRDGVTLNKSFSFQVSVPFTPK.[A]	LRDGVTLNKSFSFQVSVPFTPK	GACTTTTGGTAAATCACCTTTTGCCGTTTCCTTTGTCCCCGTGAAGCCCCCCCTGGCCGCCCCCTCCTCATTCTGGGCTGGCTGGCTGAGGGGGGGGGCAGCCTGAGGGCTGCGACGTGGCAGGTTTCTAGAATGTTCTATTGATGGCCGCAAGAGGGCGCTGGTGGCACTGCGGAATTTTGGGGGGCGGGGTGGGGAGGGAAGAGGAGGTGGCCTTTGTTCTCCTGCAGGAGGGGGTCGGGAGCGAGATGGGTTGCGGGACCATGGGTTCATTTACCTATGGGGAAATGTTAGTAGATACCTGGATTCACTAAGGTGCGCTTGCAGGACTTACAATAGGTCAGAGATGGCGTCATCTGCAGTGGCTGTGTGATTTAGGGTGTCATGGACGCAGATTAA…	RRRRAGIELASALLALAAALPETRGAHRRISYLALSSGMTSSAHTSLPGPPSGCQGCCSSTCCAPLPPEPRSTDSRNPLPYRATPCGPPWDQDSEGQATKRIISGQLVSLGFKP*TSALVRGHWPWPLTFALLVS*V*ALSCTSVLVFIC**TGVLPSPRRVVPCD*SCCPNNVLSKRVPLGTSQEGDPGQGRPASCWQLRGWGGVGCFLLE*ARG*PPKACPLPLLHPPSRRCPFWGSGDIRSNLLGLL*ELNELQQPEAGLGRDLSTCLLKGLQVDLVLPFMAHVSQPFSRRLLQPLCPGLSLRQVGAL*TTGCPGDFE*GHECAVISRALST*CDHVIPVIHVSKGVA*CLERRGELALIFIFIFYFFMIFKEVGGKENWESPDSLMRLNLNSHGG…	6.90162	707901	475	133	44.3333
EMBOSS_253_1	1	EMBOSS_253	ENSMUSG00000116295	ENSMUST00000229491	Medium	[K].DVLPFQGIQVHNADATYNQKNIDV.[K]	DVLPFQGIQVHNADATYNQKNIDV	CGTGAACCAGCGTGGCCTTAACCAGCCATAGTTATGATATTATAAGACCTGTGGGTGTCTGCCTGACCTGTAGTCTGAAGATGCTCTTTCTGAAGTCTTAGGAGGGCCCCTCAGTGAGGATGCCCGAAGCTGAAGGCTTTACTTCTGTTTCAAGAGGATCCAAGCGGCTCCCAGCACCCACGCCAGGTGGCTCCCAAGGACGTGTAACTTCCCTTCCAGGGGATCCAGGTACACAATGCAGACGCAACATATAATCAAAAAAATATAGATGTATAAAAAGAAGCTGAGGCTAGCTCCTTCTCCCCACGCTCCTTCCCTCCCAACGGGAATGGCAGGGGCTTCTCTCAAACCTACTTTACATGTACTGCAGCC>ENSMUSG00000113204|ENSMUST…	REPAWP*PAIVMIL*DLWVSA*PVV*RCSF*SLRRAPQ*GCPKLKALLLFQEDPSGSQHPRQVAPKDV*LPFQGIQVHNADATYNQKNIDV*KEAEASSFSPRSFPPNGNGRGFSQTYFTCTAA	3.64102	849874	error	34	11.3333
EMBOSS_169_1	1	EMBOSS_169	ENSMUSG00000114860	ENSMUST00000181053	Medium	[-].RGTRAAGTTADEAPQR.[V]	RGTRAAGTTADEAPQR	AGAGGAACGAGGGCGGCGGGGACCACAGCTGATGAGGCTCCGCAGAGAGTGATCCCCCCCCCCCGAGTTGGAAAGCTAAGTGGACTGTCTCGCTAACTGGGTGGCAGAGAGGTATGGGTGTCCCCGGGGCTTTTACGCTTCGAAATGCTAGGGGACAAAGATCGCAGCAGTGCCTGGCACCGGCAGCCCCTGGGGAGGTGCGAGCATGGTAGCCCACTAACCATTCGGGGACCTGAGCGCTCACCTGGCCATCCATCGCAGCTCAGCGGCAGAGAATGCTGTCACCCTGCTTGTTCACGGCGCCGGCCTGGAACAGCAACCCAACACCAAGGGGAAAAACGGTTAGAGTGCGCATATCACAGTGTCGCCACCACCCAGGAGACGTCCTGGAAAACTAGG…	RGTRAAGTTADEAPQRVIPPPRVGKLSGLSR*LGGREVWVSPGLLRFEMLGDKDRSSAWHRQPLGRCEHGSPLTIRGPERSPGHPSQLSGRECCHPACSRRRPGTATQHQGEKRLECAYHSVATTQETSWKTRQASRVPTRARSWGSLL*CKGHSGDAGLQVPTALGSGTSGSPSPAGGSRWRREKRLSFPERSKTTRISPPRHLSRDAQGAPPRLLTGSVLSAVSGVRGGATGQAPAGWRGGAGGGGCLSKAGVSF*KSTSL*DLPC*RQMSKRLDMKSECCGVYITNGSQISLTCESLLSVAKRLSQDEHSGTVLHSRNTRALPDFSLHSSNSSSPGV*HVPFSI*KETESSYLQLLMSYILDLCVFFCLVSNNYFL*A*LASRLISGGGKLVVGLS…	1.24253	1.42177e+06	1	32	10.6667
EMBOSS_142_1	1	EMBOSS_142	ENSMUSG00000097876	ENSMUST00000180999	Medium	[K].ADGVRLSENY.[H]	ADGVRLSENY	GGTCGAGGGGCGGAGCCTCGATGAGCTTTGAGGATTTTACTGTTTTGTTTTGTGCTGTGCTGTAATGTAGACAGATTTTATAAAAATCATCCCATGGTCGGAAGCTGTTCCGGCTCTCTCAGCACAGTGACTAGTCTGAGCAAGCTGCGAAACAAAGCAGACGGCGTCCGTCTTTCAGAGAATTATCATTAACGACTCTGGTGTGAAATTTGCTACAGCGTAACTGAAATCATGCACCAGTGTAGAAGCCACAGATACCAGGAAGATGCTCACAGATGACACTGTTCCAGGAGCGGAGCACCTCAGTGCTCTCCGCCAACACCCACTCACCAAAAGCCAGAAGGAGCCTGCACTTAATGGGCTCTATTAATTCAGGGAAAGTGATGCTTGATGTCCGGC…	GRGAEPR*ALRILLFCFVLCCNVDRFYKNHPMVGSCSGSLSTVTSLSKLRNKADGVRLSENYH*RLWCEICYSVTEIMHQCRSHRYQEDAHR*HCSRSGAPQCSPPTPTHQKPEGACT*WALLIQGK*CLMSGLLIQVWMLTTSFLSSSDMDELSISSGREEKG*GHQHLLSM*HFLACDTS*HVDTS*HVNTS*HVNTS*HVDTS*HVNTSYHVNTS*HVDTS*HVNTS*HVDTS*HVNTS*HVDTS*HVNTS*HVDTS*HVNTS*HVNTS*HVDTS*HVNTS*HVDTS*HVDTS*HVDTS*HVNTS*HVDTS*HVDTS*HVDTS*HMDTS*HVTLLSMWTRLSMWTLLSMWTHCLATTNYWLCS*SRA*Q*ETKGSTSNPAGSVTETRETTLTVSKS…	1.18069	5.47414e+06	53	21	7
EMBOSS_116_3	3	EMBOSS_116	ENSMUSG00000097173	ENSMUST00000180581	Medium	[R].AAAAARMPVWKVSAR.[H]	AAAAARMPVWKVSAR	GAGGGAGATGAGCTGCAGCTGCAGCTAGGATGCCTGTGTGGAAAGTGTCTGCTAGACACAGAACACAAATAGTTCCTGCATTTCTAAAAGGCCCAACTGCCGCGCTTGGCATTAGTGAAGGGCAAGATGCTGAGGAAAAGGGACAGCTCTAGGACCAGTTTGGGTGTGTGAGAAGTTAAACTTCCACCGCAGGAAGCAGGAAGCAAACGTAGCAGGTGGGATAGCAAGCTGGTGGAGGAGGGGCTGCCACAGGCGGGTGACACAGACAAAGCAGGAAACTCCGAGGGATCTCCCATGGAAGCTGAGCATCTTGAGGGCAGATGTGCTTACCGCTAGTCCCAGCCGGTGGGATAAAAGGTCATTTGGTAACCTTCCTGCGACGTTATCTTCTGGGAAGAT…	GR*AAAAARMPVWKVSARHRTQIVPAFLKGPTAALGISEGQDAEEKGQL*DQFGCVRS*TSTAGSRKQT*QVG*QAGGGGAATGG*HRQSRKLRGISHGS*AS*GQMCLPLVPAGGIKGHLVTFLRRYLLGR*TNSL*TAQGRIEYKRGQTARLKCKFTAGQESQLDLPDTPGVTGSRLHY*AQNGAIGDWWKAGRFSPLWLLDFAWPSHQFSEEAGQGEPSQTGLDHPPLSWSHLLCCFSSISFDMPLPA*GLTGSPRSSGVSCEL*SY*TESSY*KADLTTSKELCVTGNGPPLFFIKHVR*H*S*T*S	1.2178	4.54625e+06	4	8	3.33333
EMBOSS_236_2	2	EMBOSS_236	ENSMUSG00000098178	ENSMUST00000182010	Medium	[G].QVWCQQPR.[F]	QVWCQQPR	AGGGCAAGTCTGGTGCCAGCAGCCGCGGTAATTCCAGCTCCAATAGCGTATATTAAAGTTGCTGCAGTTAAAAAGCTCGTAGTTGGATCTTGGGAGCGGGCGGGCGGTCCGCCGCGAGGCGAGTCACCGCCCGTCCCCGCCCCTTGCCTCTCGGCGCCCCCTCGATGCTCTTAGCTGAGTGTCCCGCGGGGCCCGAAGCGTTTACTTTGAAAAAATTAGAGTGTTCAAAGCAGGCCCGAGCCGCCTGGATACCGCAGCTAGGAATAATGGAATAGGACCGCGGTTCTATTTTGTTGGTTTTCGGAACTGAGGCCATGATTAAGAGGGACGGCCGGGGGCATTCGTATTGCGCCGCTAGAGGTGAAATTCTTGGACCGGCGCAAGACGGACCAGAGCGAA…	GQVWCQQPR*FQLQ*RILKLLQLKSS*LDLGSGRAVRREASHRPSPPLASRRPLDALS*VSRGARSVYFEKIRVFKAGPSRLDTAARNNGIGPRFYFVGFRN*GHD*EGRPGAFVLRR*R*NSWTGARRTRAKAFAKNVFINQERKSEFRRRSDTVVVPTINDADWQCGGVIPMTRRAASGKPKSLGSGGSMVAKLKLKGIDGRAPPGVEPAA*FDSTRETSPGPDTDRIDRLIALSRFRGWWCMAVLSWWSDLSG*FR*RTRLWHAN*LRDPRAVGVPQLLRGTSGVQPPEIEQ*QVCDALRCPGLHARYTDWLSVCLPYAGRRG*PVEPHS*WGSGIAIIPHERGIPSKCGP*ACVD*VPALCTHRPSLLPIGWFSEAHGPGGALRRRSNLTI*RK*…	811.917	2.73786e+06	2	165	55.3333
EMBOSS_212_1	1	EMBOSS_212	ENSMUSG00000097391	ENSMUST00000182499	Medium	[H].DGNLQKDGGSVK.[L]	DGNLQKDGGSVK	CAAACTCTGCTTTTTTGAAGGGCCCCCTGCACAAGCGATATGAGACTGCCTGCCTTGTGTGAGCCTTGGATGAGCCCTGCAGCTCCTTCGAGATGCTCCTTGGATATTCCTGATGGAGAAGACCAACCCCGAGGAAGCTTGGTCCTGCTTGCGATGAGCTTGCTGTGCTTTCACGGACACCCTTCGTTTCTTCTACCAGTTTTCAGTGCCAGGGTGCGCTTGAAAGGAGAGCTGATGCCAGGGCTATAGCCTTCCCCAGCCAGAGCATGTGGGCCAAACCCTTTCTGGATGGCTAGGCAGTGGGGAGAAGCCATGAGATGGTTGAGAAGTAGTCACAACTCCCCTGGGGACAGACTGGTTTTCAGGGTTACATCCATTCAAAAACACCCCCCGGAATTC…	LSGMMPVADRKPSSCRLDDSSLGGDQSWMESVQDGCQLHTRALSGLA*GL*EYIWPREKCYQLLKVNTKWPIYVRGKPKAQEEMMDQKQQDMLEDLLHGGWPRDGGAHRWSRLVLADW*CLCPWLCLFWSTSCQCCHRGLSGQHGTFRKETLASVASPEMRQWEWRITWDHVELNEPSLDSYEDASSLGWAFLQWDFYSPLRTLM*LTICAPLRNASPHSHTPGSIYLQRTSDLQQVGSLLILKTFQCEL*NQGRQRKGTMSASLQGSTKCYL*GFPGHDGNLQKDGGSVKLVEKPSMDVWPRTVCLS*L*VTWSGYLSI*STCRPLISGPCQPW*GSCGSAPKYQLTRL*KEVIFRKRCWCQHHSGCVTG*PEGRALCSPCGPPSHQPSASIPLKEDF…	1.05564	5680778	280	40	13.3333
EMBOSS_095_3	3	EMBOSS_095	ENSMUSG00000087179	ENSMUST00000149275	Medium	[G].QQQSGLNAGQAGLR.[L]	QQQSGLNAGQAGLR	GGCCCGCTCCTCCTTTCAGAGAGTGTTTCCGGAGCGCCTACTGTGTGCTCCTCCATGGGGGTGGGGGCACTACCAGGCACAAAGGGTGCCAGTCCCCGTACCTTTGTAAGTTCGCCTCCTCCTCTGGGAGCTTGCCCTTGTGGGGATGGGGAAACTGAGGCTCAGTCGGCTCAGAGTAACTCCCAGGTGCTAAAGGACCAGTTGTTTTGTCCGCTCATAAGGCAAACGGCGCGGCGAAGACCACTTGGGATAAAACCCCAAGCCTAGCGCAGATGGTCGGCCAGGGGAGCCTCTGGTGGGCAGTCACAAGCCCACGGATTCCACCAGTGACCCCAGGCCTGCTCACATGAGTGACGCGTTCCTCCCCATGGCCAGCAGCAGAGCGGACTGAATGCTGGG…	AAWPGPGAERWDQGSRSQLQGRKWPAPPFRECFRSAYCVLLHGGGGTTRHKGCQSPYL*ASGGQSQAHGFHQ*PQACSHE*RVPPHGQQQSGLNAG*QAGLRLRCSRIFLLQVPK*HCTLHT*IPMPDG	3.27915	1.08255e+06	error	55	19
EMBOSS_169_2	2	EMBOSS_169	ENSMUSG00000114860	ENSMUST00000181053	Medium	[V].YTLQTVAAQESNMFPFPSEKK.[L]	YTLQTVAAQESNMFPFPSEKK	AGAGGAACGAGGGCGGCGGGGACCACAGCTGATGAGGCTCCGCAGAGAGTGATCCCCCCCCCCCGAGTTGGAAAGCTAAGTGGACTGTCTCGCTAACTGGGTGGCAGAGAGGTATGGGTGTCCCCGGGGCTTTTACGCTTCGAAATGCTAGGGGACAAAGATCGCAGCAGTGCCTGGCACCGGCAGCCCCTGGGGAGGTGCGAGCATGGTAGCCCACTAACCATTCGGGGACCTGAGCGCTCACCTGGCCATCCATCGCAGCTCAGCGGCAGAGAATGCTGTCACCCTGCTTGTTCACGGCGCCGGCCTGGAACAGCAACCCAACACCAAGGGGAAAAACGGTTAGAGTGCGCATATCACAGTGTCGCCACCACCCAGGAGACGTCCTGGAAAACTAGG…	EERGRRGPQLMRLRRE*SPPPELES*VDCLANWVAERYGCPRGFYASKC*GTKIAAVPGTGSPWGGASMVAH*PFGDLSAHLAIHRSSAAENAVTLLVHGAGLEQQPNTKGKNG*SAHITVSPPPRRRPGKLGRRAESPPEPEAGEASCDARDTPETQGSKSQPPSAQGPVDHQAQQAALGGDGRSGCHSLRGARPPVSRRPATFPAMPRVPRQGFSPGQC*AR*VGSAAARPDKPRPGGEVARAVAAVSAKQGFLFKSLHLCKTCHVEDKCQRDLI*NLNVAVCISPMDPKYPSPVRVYCPWPSDFHKMNIQEQCFTAEIHELFQILVYTLQTVAAQESNMFPFPSEKKLSLLTYNY*CHIFLISVYFSVLSLTIISYKHDWPPG*FQGGGSL*WG*V…	1.24253	1.80988e+06	330	32	11
EMBOSS_006_3	3	EMBOSS_006	ENSMUSG00000021268	ENSMUST00000143272	Medium	[A].GGGGQPEGCDVAGFNVLLMAAR.[G]	GGGGQPEGCDVAGFNVLLMAAR	GACTTTTGGTAAATCACCTTTTGCCGTTTCCTTTGTCCCCGTGAAGCCCCCCCTGGCCGCCCCCTCCTCATTCTGGGCTGGCTGGCTGAGGGGGGGGGCAGCCTGAGGGCTGCGACGTGGCAGGTTTCTAGAATGTTCTATTGATGGCCGCAAGAGGGCGCTGGTGGCACTGCGGAATTTTGGGGGGCGGGGTGGGGAGGGAAGAGGAGGTGGCCTTTGTTCTCCTGCAGGAGGGGGTCGGGAGCGAGATGGGTTGCGGGACCATGGGTTCATTTACCTATGGGGAAATGTTAGTAGATACCTGGATTCACTAAGGTGCGCTTGCAGGACTTACAATAGGTCAGAGATGGCGTCATCTGCAGTGGCTGTGTGATTTAGGGTGTCATGGACGCAGATTAA…	LLVNHLLPFPLSP*SPPWPPPPHSGLAG*GGGQPEGCDVAGF*NVLLMAARGRWWHCGILGGGVGREEEVAFVLLQEGVGSEMGCGTMGSFTYGEMLVDTWIH*GALAGLTIGQRWRHLQWLCDLGCHGRRLIYFQ*FVFSGVLERCGFLRKNCKKY*LIRRHP*GS*ELTWQRGGKVLRRRVLIGWGEAGWSAFILSYS*RPQK*VFCIKN*VFKF*LCLIGFTNGGWGQRPAFTYQE*NCGLGAAPYCRVSLVQGGSWMPVCVLRHVWKMAQAEAMGVHSDP*RWLMWALPPPPKPETCWAPSPLLRQSSSSSCVLAPVGVPQVVGLLES**VRAARPLAVSMCKWFLACQTSARVAHAHTANTCDLSINSSVPLPLLSSPPISPPTSPPISTFPLP…	6.90162	1.48183e+06	error	133	45
EMBOSS_192_1	1	EMBOSS_192	ENSMUSG00000097207	ENSMUST00000181374	Medium	[A].PAGAGTNLNKPLKK.[I]	PAGAGTNLNKPLKK	AGGCGGCGGTGCTCAGTGGTCGGTTACTGAGGGGCCTTGTGGCAACAAGGTGACATAGGACAAACAGCACTCAGGTGAGCACCTGGAAAAGGCTGTTGAAGCACACAGGCACTAGAACTACTTTATGAGCATAATTCCTTGGACCATAATCGTCACCTGAGGAAGCCGCGTGAGACACCAGTCTTAGGATTCCAAAGTGAAGAGGAACGTGCCCTCCTCGATGAACGCCTGTGGAAGCCTTTGAGCAGCCCTTTCATGGCGGAAGAGAGGGCAACTCTGAGGTGATGGAGCAGCGGCTAGGCAGAGGGCTGCTGAGGAAGCAGAGGGAGGATCGCTTCAGCTCTCGGCAGGCTGGAGCCTCAGAGCAAACCTCAAGTAACTTTCTGTGGATGCTGTGAG…	SLQAAVLSGRLLRGLVATR*HRTNSTQVSTWKRLLKHTGTRTTL*A*FLGP*SSPEEAA*DTSLRP*DVYRTSKYSVLFKARQKGYWSWTQVAATLSQNPFSLCWTL*LSLTLLRSAIMGNGDQQWMRNSNSIRDLNKNPPAQTSLTRDFLPPNEQHKQLNGPLWCNPFLKRPLLHELPNRHSKVKRNVPSSMNACGSL*AALSWRKRGQL*GDGAAARQRAAEEAEGGSLQLSAGWSLRANLK*LSVDAVREGAQLSGVLTSSWLKMKAQNRIFPRSCVALARKVAGCLEPKMAPPQKLCGSRLYQKRLASVFHTVTRAGYPPRSPGAKEAPAGA*GTNL*NKPLKKIKSKRWSLRI*ASFDVTMDSRLVSNL*PFWVSLLPSGIPSACHCTPYASRN…	6.81367	5.16748e+06	error	125	41.6667
EMBOSS_076_2	2	EMBOSS_076	ENSMUSG00000091514	ENSMUST00000167899	Medium	[D].KQQPTDTLACVR.[R]	KQQPTDTLACVR	AGACGTCGGGCGCCGGGCACGCGCCGGGCACGCGCTAGGGGCGTGGGGGACACGCACGGGAGGCCTTGCCTGCGCTGAGGCTTTGAAGGAGGAAAATCGGACCTTCTGACCCCTCATGGGTCCCGGCAACCCCGGTGGGCAGGACTGGGGTGACTGAAGGCTCTGTCTGTCTGTCTGTCCTCCATTCCCTCCCTCTATTTGGATTGAGAGGCTGTCAAAGTTATCCCTAAAGCCTAAGAGATCTGACAAGCAGCAGCCTACAGACACCTTGGCTTGCGTAAGGAGAGGTCTACTTGGCAATACTGACAACTCCAGTTTCCTATTCTGTTCAGTCATCTGAGAACCGGAAAGAATCTTGTCACTGCTGCTTTCATTCCTCTGCCGGCTTTTCCAGTTTTT…	DVGRRARAGHALGAWGTRTGGLACAEALKEENRTF*PLMGPGNPGGQDWGD*RLCLSVCPPFPPSIWIERLSKLSLKPKRSDKQQPTDTLACVRRGLLGNTDNSSFLFCSVI*EPERILSLLLSFLCRLFQFFPPFKF*VRRKLECVASCHNRRFKRWELTKLKSSLAKSVTGSPAFQVIS*SLFF*FFQYGLDLTNSFFPGLTDRVLAPSFNRIQF*KFLCQHFFQKPIRFVCLFSYKLFYFLLKKLHLLQHMYDLFNTWRSALI*RETLFWEIITRNLVAGMLAAGITI*LRLSTILDLRIQKV*VVIVHCSRRFILMDAAGKAVPAQALTRWVVGVRGVLEMGRQKGDRSCLSGKLSTSDMSVCIVYQPGKN*KDFHRTIRDQHC*TTKGEPFEAG…	5.85835	8.21028e+06	83	116	39
EMBOSS_004_3	3	EMBOSS_004	ENSMUSG00000106943	ENSMUST00000066220	Medium	[L].KLPANTCTSPK.[K]	KLPANTCTSPK	GGGGGCAGCTCCGCCCCTCTCCCGGATGGCTGTATTAACGCAGCGCGCAGCGGCTCGGTCTTTCGGTCCCGGCCTTGGTGGTGAGTGTCCTCGTGGGAGGGTGTCAGGATGTCCCCGTGTCCCCTCGAGCTTTGCCCGCCCCGAGCTCAGCTGCTCCCGGCGGCCAGAACGGAGGGGTAGAGCAGTTCTCAGCGGCCCGCGGGGCGGGCGGCAGTGTCCAGCCCGGGGCTGCGCGAGACACAAAGTCCTCTGTGCCGTCCGACCCGGGCACCCTGACCACCGCCCTTTCCCTCTGCAGGCCGATCCACCCGAGCCGGTCCCCACTGCCCAGCCGTGCTGCTGCCTCGGACACAAGCGCAGGTACGTCCCGGCATTGATCGGAGGCAGGCCCTGGCCACG…	GQLRPSPGWLY*RSAQRLGLSVPALVVSVLVGGCQDVPVSPRALPAPSSAAPGGQNGGVEQFSAARGAGGSVQPGAARDTKSSVPSDPGTLTTALSLCRPIHPSRSPLPSRAAASDTSAGTSRH*SEAGPGHVAEKTEVPGLSLLSCAGPPQSPFPVPF*GCRSTLRG*HRRVKELSIKPREENYTSSLDPVWSHK*TKSFI*NLNVRILGSGDC*VVI*DFKEKKT*PTWFNLVGGESSEDKNTFAFLEVRF*VSWKGYS*VCSTYVKHFYSFIG*KLQETRD*MAPR*STLACSDQVCLYSTLGLVSKLK*VK*GPCEFP*MAL*LITLKVVC*RF*SMY*DPAPPLLHVPLP*NQICMAMTCSPF*RCKDFMLDH*NVSGLR*DKFFASNQSRASN…	10.4918	953004	679	26	9.33333
EMBOSS_372_1	1	EMBOSS_372	ENSMUSG00000091994	ENSMUST00000217802	Medium	[Q].AIKQILWDSQR.[H]	AIKQILWDSQR	ACCGGAAGTGCGCTGGGCGAGGGGCTTAAGGGGAGCCGAAAGCTGGGTGCGGTCGCCCTAAGCCAACCGGCTTCCTTAAGGGCCTCAGACGCCCGGGATTCCGAGCGCGCCACGCGGAACGAGGCCACACGCACGCGCCCATTGCAGCGGTTAGAGGGATCGGCGGGGGCCAAAAGTCCACGCGCGCGGCAGCGATGGCTGGGACGGAGTGGTGAGCGGAGCGGCGTGCGAGGGGCGCGGCAGGACTTACCCGTCCATGGCACACGGAAGAGACCCGCGGGGAACGGAGCGGAGGCGCAGGAATAGCAGAAACCGACCCAACGGCTCCGAGTTATAGACTCACAAGATGGCGGAGACGCCCGCACACGTCCCCCGCGCGCGATCCTCATTGGTTCCCGC…	TGSALGEGLKGSRKLGAVALSQPASLRASDARDSERATRNEATRTRPLQRLEGSAGAKSPRARQRWLGRSGERSGVRGARQDLPVHGTRKRPAGNGAEAQE*QKPTQRLRVIDSQDGGDARTRPPRAILIGSRCGLWAWSTPPAPARAFYWSKGYSKGETHPDSRQLLGGTAVSQDGRRKRPVGEGEGVNE*THVIPSEPMSEPLFDPWDAILRVGTWRVRRREACILEVASILQAGTGSR*PPT*E*SKLLRHLRSGQKTPYCPSLLVVTWPEFGLSTEFLLD*IATRWRPRAS*TQSRLDCESSLSVFCLPTAAKLHLCRRDGETEERSRSVAGSA*SWGNEATNSAAAESTGGTKLRPLVPSPQQPGFCLPVLGYHKARRVLQGLVQAIKQILW*D…	4.34051	4.55516e+06	error	195	65
EMBOSS_154_3	3	EMBOSS_154	ENSMUSG00000097641	ENSMUST00000180970	Medium	[E].TRELQLR.[K]	TRELQLR	GCACTCCTGGAGATTGAGCAGAGGGTCTTCCGTGCGCTAGATAATGACTGAGCTAGACCTCAACTATAATCCTGAAGCACTGCTATACGAGTTTCTTTTCTCACACCCAAGGGGAGGAAACCCTCCTTAAAGAAATGAAGGAACGGGTGCAATGCCAAGAGATGTGGCTCATACACTCAAACGCAGCAAACTACTTCCACAGCATCACCCCCAGGTTTTCTTTTATGTCCCAAGGGGCATATAAAAATGCTCTCAAACTTAAGCCATCACACAAATGCTAAATTACAACAGAATCTCTGGCAGAAACCGCATTTGGATTTACTGGGTTATTTAATGAATTTTCAACAGAAGCTGCTTCTGCTAAATCCAATTCAGTCATTTCAACATACAGTCTTGCAC…	TPGD*AEGLPCAR**LS*TSTIILKHCYTSFFSHTQGEETLLKEMKERVQCQEMWLIHSNAANYFHSITPRFSFMSQGAYKNALKLKPSHKC*ITTESLAETAFGFTGLFNEFSTEAASAKSNSVISTYSLARLF*NSKNYPQVTGVQERLNMQDCYQ*DCAEKSKIINRHFIGKGF*EPGKSAVH*AGV*SASGNIL*ILHWLVLASSETRELQLRKWLYQDCVAGKSVKHFL**VIDIEGGTILALCPWIIKQAD*ASHEEQASAPDF*PVGIPPWLSSVNSGSKYVIQINSFLPWLLLVMVFQHSANNPKQERLSKADALRSGMEQGRLGGKTVTSTANGFRVEL*STRQLRSFPKRFHCCTGQSCSSDRREGDWAARPPPAPASAITCFRNHRRL…	2.14838	2.09768e+06	211	44	15.3333
EMBOSS_217_2	2	EMBOSS_217	ENSMUSG00000097309	ENSMUST00000181277	Medium	[G].KGAEDLRTSSLAQVCQLSSTK.[S]	KGAEDLRTSSLAQVCQLSSTK	GTCTCCAACCTCTTCCGCTGCCTGCGCTCACGGCACTTACCTCCACAGTCGGGATCGGCGCAGTCAGCTGCTCCGGAGTCAGGCTCCCGAACTCCTCGGCTAGAACATCCATTCCATTCACGGTAGAGGAAGAAGTCGGCAGAATGTTCACATCCGCCCGTGCGGCTCCAAGCAAGTAGCACGCGGAGAGTGGTGTGCGTTCTCCTCCGGTGTCCCCGTGGCGCTTGTTTACGGGGAGGCGTTTCAAAAGGTTCCGCCTGGTCAGGGCCTAACCTGCGGAGGAACCCGGAAGTGACCGAGCCGGATGTGGAAAACTACACCCACTGGTGTACTTCCGAGGTCTCGCCGGGCTAATCCTAGCCTCTTGACAGGCTCATTTCCAAAGGAAACGTCAGAGGG…	SPTSSAACAHGTYLHSRDRRSQLLRSQAPELLG*NIHSIHGRGRSRQNVHIRPCGSKQVARGEWCAFSSGVPVALVYGEAFQKVPPGQGLTCGGTRK*PSRMWKTTPTGVLPRSRRANPSLLTGSFPKETSEGRSLLPLHRINEGLHIILPRQHRHL*SQHLEARGRRASRNSRASLAT*QGRGQPGLHETLSPKKR*CINNIDW*KISRMATEKA*ELLKVVFH*FLKN*IHL*KISMNSKHTVGRRQKDLSLKLEMSSCKSNGKKNPMGRRGKRCQQFLNEFQFGNIQKLWRWMVSHECVQCSWPFNS*TI**FTCIISTI**YVFFFFFKPGPR*SAYRVS*LNFSACI*TLC**TSETK*RKKEKNYRPPRWLSMLSHLPQSLKSRVQPPRPTL*…	4.21591	1.17631e+06	466	144	48.3333
EMBOSS_259_1	1	EMBOSS_259	ENSMUSG00000113204	ENSMUST00000222064	Medium	[F].LALLQSPLPMCR.[C]	LALLQSPLPMCR	AGGCGGATGAACAGCCAGAGCTGCAATGGTGGATCCTCCTCCAGGGCTGCATGGGACGACAGATAGATGAGGCTCTAGGACGGGCACAAATGCTACCCGAATGCAAACCACTCCGGAGATCTGTAAAAGGACTGGCCCCGGACAGGAAGCACACTTTAAACTAGAGGCGGGGTAAGACTCGTGGGCCAATCAAGGCTTCCGAACAGAACTGCCATTCTGGCAATGAGGCGGGGTCTTCCGGTTGCCTGCTGGAAGTTTGTTTTTGCTCTGCAGGATTGAAGGGTTCTCCCTATGCTGCTTTGAGCGCTGCTATTGGGTGCCTTGAGGGGACCTCAAGTAAGCTCCATTTTTGAAACATGAGTCAAAGCCCCGGTGAAGATTCTGTGACGGTTCATTGTA…	*GDLK*APFLKHESKPR*RFCDGSLYNL***RLSCILRKRDVEISKALRNLSCRHAHREREYPN**ELTGIGPSKPLESEVHCVSNKGI*FGVCPAVFLALLQSPLPMCRCLSIGIGRGILCHCMPERYNLCSDYKRSGNQVISLSVKRGFEHFNSVGASTDYWSH*SSTECIFITGGI*ASSA*GQNGVY*KKMFLEKLMSVNPCLSILAFFGELTDALLGGAFPDFFY*GIGFVCL*TQQISFFFISSIIYIFIILGVTFPLQVTPFIESLSPILSDSPLSGCVPSCLSPNHGSVSVCPNRCVLSH*SQTGQCP*GNRF*R*SRALGTACTPVVGRPT*SLSCISATYVPGTLVQSLVGGSASECPQKLLILGMCSESRLMSLLFFLGSSYPIKALQ…	7.1318	3.79104e+06	99	7	2.33333
EMBOSS_097_3	3	EMBOSS_097	ENSMUSG00000097033	ENSMUST00000180656	Medium	[T].PQNLSAHSNYSPELHR.[S]	PQNLSAHSNYSPELHR	AAAACTTTGGACTTTATTATGTCTAGTTGAAACCCATGAAAACAGTTATGTTCTTATACACAACATCTGAAAATGTAACTATAAAACCGAGTTTTCTCTTATGGATAGTGTAACAGAACAGCATACATAAAAAGGAAATGTCAAGTAGGAGCCCCATCACATTTCACATTTCAGCACGGTTGTCTTCCTGCCTGTTCCCCTGGAGAAAGAAGGGGTCACCGAGGGTCTAAGAGCTGCAGGGACAGCTGAGGCACAGCTCTGCTCCCCCAGCCCGAGTCCCACAAGATCAAAATGATGGAAACAGGAGGTAGGGGCCAGGCCAGTTCATGTGGCTGGAAGGCAGCAGTGGCAGGCACAGCTTCTCACTGGCTCAGTCTGGTTATTACAAGGGTATGGGAT…	NFGLYYV*LKPMKTVMFLYTTSENVTIKPSFLLWIV*QNSIHKKEMSSRSPITFHISARLSSCLFPWRKKGSPRV*ELQGQLRHSSAPPARVPQDQNDGNRR*GPGQFMWLEGSSGRHSFSLAQSGYYKGMGSSLRTVGDLPPECSDTWPCLLETL*KVPESVGF*ISKNKNSCVKKNPSYTQHTPSKEPRIQPRQPPKGMEPGHLSSTS*HPESTTQCLQLTC*RDVTSLKGDCIFKTIPSFWLKKETPD*APPTRCSHCSGEAVCRQHTPQNLSAH*SNYSPELHRSQVQTSPKFSLALERHYPLFQPPIPHSGFIQSKKVSTLRVTEPVSQRHMQSHCNN*KTLTGAQWGHAGLRSVP*DCHGSQVRNGSKSGKCSGKINHMSTING*CTPARPKA…	7.93733	2.01988e+06	error	19	7
EMBOSS_136_1	1	EMBOSS_136	ENSMUSG00000097767	ENSMUST00000182953	Medium	[S].SLVGQGRDQR.[E]	SLVGQGRDQR	TTTCACAAGTTTTGATCCAGCGGCACTATATTGGGGCTTAGAAGATGACAATTACATCATGGTCTCAAAGGTGTGGATGGCGCTGGTCTGGAGCATCACAGAACCAAGGTTTTTAGCGACTCTTTAGCATCCCTGTAAAGCTCGTGATGGTGCCAAGGAGTGCAGGCAGAGCAGATGCCAAAATTAGAGACCTCTGCCACAGACTTGGGTTCGAATCTTGCCGCCGCCCTGACCAGGACTCTTCCTAACAGAGTTCCTCGGCAACCACGCCCCGGCCCTGAGAGCCAAGCACGGATACCGGGTCCTCTTCTGGGATTCTAGGCAGTGCTTCTCGCTTAGGCGCCAGGTCCGCGATCGCGCCTCCGACCGTCGCGCGCCTCTCCACTGGCCAGCGTTGCT…	FHKF*SSGTILGLRR*QLHHGLKGVDGAGLEHHRTKVFSDSLASL*SS*WCQGVQAEQMPKLETSATDLGSNLAAALTRTLPNRVPRQPRPGPESQARIPGPLLGF*AVLLA*APGPRSRLRPSRASPLASVAMAAPQGGDAEAEARSSPFVRRGRDVHPTSLCLSPGPQDGCLFVCPTPPPRPRPGAATPPASRSCIKISWALQ*TRRRRRLRWGAVGREAADQSGEEFARGGAWEDSPSSVKSWAQRALCTPAAGARRSRARCTWAWGLRYNTNPQDLGRPAQPQTQGISALSSRRRSGCCLHILGESLLWHNSPARCWNSVCSHHTDMADLSQWYLGAKQGAGRWRPTLLPSWLCLNTGTEPSEPQEFLLVPRWWKSGEIWERSRLACKAALQISI…	0.999065	1.04402e+07	561	45	15
EMBOSS_118_1	1	EMBOSS_118	ENSMUSG00000087595	ENSMUST00000155199	Medium	[Q].KSAASAPQR.[A]	KSAASAPQR	ACGCGGACACCCAGGTACTGTAGGCAGAAGAGCGCGGCCAGCGCGCCCCAAAGGGCCGCTGTGAAGAGGCTGCAGCTGAAGTAGAGCAGGAAGCGTATAAAGCCATAGAGCCAGCGGGTCTTGACATAAACATCGAAGTTGTTGTACTTGGTGCGAGCCAGGTGAGAGGTTCTCAGCGGTCCGCAGGCTGCGTGCAGGCAGGTGGTGTGCGGGCCGTGGAAGGAGCGCACCCGCCGCGGGATGGGCATGACCGGCATTGGGCCTGGGCGGCAGTGCTGTTTTGCAGTGGCGGTGCAGTGTCCGGATGGCCAGCATAGGTGTCATCAGCGTCTAGGAGCCCTCAGCTGAGCCTTGGGGGAGGTGCTGGCCTGCAGGGAGAAATACAGAATGCCAGGTTAC…	TRTPRYCRQKSAASAPQRAAVKRLQLK*SRKRIKP*SQRVLT*TSKLLYLVRAR*EVLSGPQAACRQVVCGPWKERTRRGMGMTGIGPGRQCCFAVAVQCPDGQHRCHQRLGALS*ALGEVLACREKYRMPGYHLTSH*SCSVN*GTKTSSLGLPVHNKSITGLSRLDIVSEFSKLGHREEKWRVVPCFTKX	1.52402	2.07136e+07	10	241	80.3333
EMBOSS_231_1	1	EMBOSS_231	ENSMUSG00000098161	ENSMUST00000182885	Medium	[R].KGMKAMLTGEVS.[V]	KGMKAMLTGEVS	CTGAGCTCACGGACATGAGGACTGGCCTGCTAGAGAAAGAGCGGCCCAGGCAGAGCATGGCAGGAATTGAGTACTGATTGCAGTAGCTTTGGAGGATGGATGCTCTGTCTGACTTTCTTATGATGCTCCTGGAAGATGAGACCCTCTAGGAAGAAGAGTGACCTGAACCTCAAGGATAACCTTAAACATCTGACCCGCAGCCTCTGCTTCCCACTGCTGGATTGTGATGGATCTCATTCGTGCTTGTCTCACTCCTGGAACAAAACCTCTGACCGGAGCAACTTAAGGAAGGGAATGTGAAAAGCTATGCTGACAGGGGAGGTCTCAGTCTGTGGAGCTTACATTCAGGGCGGGCCTTCCCACCTTAGTCTAACCACTCTACTCTCGG>ENSMUSG000…	LSSRT*GLAC*RKSGPGRAWQELSTDCSSFGGWMLCLTFL*CSWKMRPSRKKSDLNLKDNLKHLTRSLCFPLLDCDGSHSCLSHSWNKTSDRSNLRKGM*KAMLTGEVSVCGAYIQGGPSHLSLTTLLSX	0.855458	880156	error	15	5
EMBOSS_319_2	2	EMBOSS_319	ENSMUSG00000115092	ENSMUST00000227784	Medium	[R].LNLEMR.[P]	LNLEMR	GGTTCATCTATGAAGCAGCTGGCTCCAGAACCTTCTGCCTGCCTAAGGCCGAATAATGCTCTGCTTCTGAGTATGCTGACTTGGGTTGTCTGTTTACCTCACTGCTGGCTGCTGGCTGCTGTCCCCCTGGGAGCTCCCTGCTTGGCTGCTGTGGCTAATGCTGCCAGGAGGAGCAGCGCTGTTTTCTGTGGACCCTTGTCTAGTTGTGGCGGTTGCTGGGAAAGATGAAGTCCCCAGACTGGAGCTCAGGCTGCAAAGAGGCTGGCATGAAGCGAGATGCCCCTTCTAGGCCAAGGCAAGATCTGCTGCCCTCTGACTTCTACCTGTTGCTGAGATGACTTCTGTCGCCAAGGCACCTGGATACCGAGCCACTCCTTGACAAAAGCCCTCTCCAGCCTG…	QNLLPA*GRIMLCF*VC*LGLSVYLTAGCWLLSPWELPAWLLWLMLPGGQLSKNLSLQALLPVPQAPHPEAGEEP*EQCPLCSQTLFIMAPMTLDFHLCCVS*PARGLQLHLLSGCCVRRKNGPLQGHSYRPGVPGETDSANVCQLRARSRMWPLWSSLVGSPRCIMEGVPHALRQFLPRRGSAYWCGQDHVCVCARARACARVRVRVQRPRQ*ETQLRLPTDF*AKQSDALVTVSGTQE*LWQWVLLLRQRHGGGGGEEEGQQEVENNFGFEASSI*QKAELRECAWQQAQGGH*DITLKELQCGSARQPGPPAQLLAVPIRHLGLILVWGWGGGGREVSLQICMIK*QRKALDPPRPAMIPHSVSF*THLTLKSPQLG*FTTC*CDCFKLHFSVCFL…	2.46079	38003451	1223	10	3.66667
EMBOSS_258_3	3	EMBOSS_258	ENSMUSG00000109754	ENSMUST00000210912	Medium	[K].KAMGVHRLHK.[K]	KAMGVHRLHK	AGTGTATTAAAGAAGCAAACACAGTGGAGGGCCAGCCAGCATAGCTATGGTAGCTCCAGAACAAAAAGCCCAGAGGAAATCAGAGCCTCTTTGTGAACAGCTTCCGTCTCTAGTATATTGAAGGAAAGTGACTGACATGCTGTGGACATCCCACCTGGGCTTACCTGAGCCGTTTTTCAGATATCCATTTGCATCTACTGTTGTGTACATGATATAAGGTCCAGGCTGATTTACTCCAAAAGGCTGCAGGAAGAAAGGAAATAGTTGGCCTTGAGAAAGTTGCCTTCAGTGAATGCTTATCAACTATACACAGTTGTTCAAAAGTGTGGGCCAGAAAGATTGTAAGAGTCAGTGGGAATGGAAGACACTAAGGAAACGAGGCCTTCTAAACACAACAGG…	CIKEANTVEGQPA*LW*LQNKKPRGNQSLFVNSFRL*YIEGK*LTCCGHPTWAYLSRFSDIHLHLLLCT*YKVQADLLQKAAGRKEIVGLEKVAFSECLSTIHSCSKVWARKIVRVSGNGRH*GNEAF*TQQD*HTSDHRDCGSMQRSKDCRTLWYEPP*PSKQSIWNLRK*IYKKAMG*VHRLHKKL*ADPIDSSWERLYQIKYCQSQVAVRRHFASVCHAVYPLPSRCILQYSQSIWVAVHVVVSNVKCEWDWYCGWLFFMHKWHKAPECTLIAKILKHRNPLRIKKKKKKEYL*SL*GNSHHLQKERSIQSAEDSHHFISFSQNGRHDHLF*CTCETLGGLVFHRLCPEHLCLNSTQSHRVLTHTCNRRNEQALSSPDRHRTDKGNLL*HQNRWKQ…	1.53067	2.86285e+06	error	47	16.3333
EMBOSS_160_3	3	EMBOSS_160	ENSMUSG00000097862	ENSMUST00000181743	Medium	[R].KKNLTSFLH.[S]	KKNLTSFLH	GTAATGAAGCAATAATGGGCCACAGGTGTTCCTGAGAGGGGATGAAGAGATCAGGCTGTAAGAGGTACTGGTTCCTGTGGGACCAGAGGGGAGATGAGGGACTGGTCTGAGTCTCACTGGGAATTAATTTGCATATCTCACTCCTACCTGGTGCCAGGCAAAAGGGAGGGGGACATAGGGACAGCAGAGTCTGGGAGACCTCGAGTAAGTTGCTAGGAATGGGATTCTGACATGGAACTACAGGGATTCTAAGGAGTGGATGGTTATACTAAGGGGCACAGAAGGCCCCAGAGATGCCAGAGGATCGGGATTCAAACATACCCTACCCGATCCAACCTATTTTTGGTTCCACCAGTCCAATGCCCACACCAGAGAGAAAAAAAAACCTCACCAGCTTCC…	NEAIMGHRCS*EGMKRSGCKRYWFLWDQRGDEGLV*VSLGINLHISLLPGARQKGGGHRDSRVWETSSKLLGMGF*HGTTGILRSGWLY*GAQKAPEMPEDRDSNIPYPIQPIFGSTSPMPTPERKKNLTSFLHSQKHSHHKHGWALQFQGTRWASKKGKVQGAESLSEAATESRPFARKMLSTSSWSLWRRQRCLEE*YIMMPKY*KESSGWVRAWPRAGDLVAMETVPTAPPPPTPELGFELN*QEASKRMPLVLPREKCQAR*PVQMKRPLKGNVPSAHT*RTFREGREAPEETESQSPVLTEYSVWPPGGQPQWTWTAPGKKTASVDWA*MGKASVRKLPVQSFKDLSPLLWRVSTWPSSQHLPPPETLVGETQRLL*E*VLGWSF*PWRAAQKQ…	1.53639	1.12661e+07	126	4	2
EMBOSS_405_3	3	EMBOSS_405	ENSMUSG00000093908	ENSMUST00000220896	Medium	[R].VIKNCQSKNLE.[N]	VIKNCQSKNLE	GACAGTGGCTTGGTGGCGCGCAGTTCCCCTTGACTGTGCGCGCCCCCGTCTGGGCTCCTTTGCAGAGGAATCGGTAGCTGCAGCTCCCGGAGCACAGCGGACAGAGCTGCGGGCTGCGTGCGCCCCTGCTGCCACCGGGCCTGCCGCGGTGGCTCCCGCGCCCCGCGGCGACTTCCGCTCCCGTGCTTCTCTTTGTTCAAGTCCCCGAGCGGCGGCCGGGTCGGAGCCCGCGCCTTGGGCGACTGAGGCGGCCGCAGTCCGCGCCCCGGCGCCCTGGCGATGCCGGACCAGATCTCCGTGTCGGAATTCGTGGCCGAGACCCTTGAGGACTACAAGGCACCCACTGCCTCTAGCTTCACCACCGGCACGGCCCAGTGCCGGAACACCGCGGCGGCCATC…	LCRGIGSCSSRSTADRAAGCVRPCCHRACRGGSRAPRRLPLPCFSLFKSPSGGRVGARALGD*GGRSPRPGALAMPDQISVSEFVAETLEDYKAPTASSFTTGTAQCRNTAAAIEEV*SPLPAAMDKQNSKLGPEVLQDLQNHREFTDHELQEWYKGFLNYCPTGHLTVDNFKI*ANFFPYRDASKFAEHVFHTFDTNSDSTINFRVFIIALSMTSRGKLEQKVKWAFSMSDLDSNGYISCSEMLEIVQVPALDRAWSMGSAGVQDPHPRPHTPG*VIPLPTCYLVY*RTACLCRE*Q*KPASLDCLLDIRPQLSSSIRFFHTILSNGSFIFNL**DLRLR*VIKNCQSKNLENGSVGKNT*YPA*GPDF*SQHPRKSQEWLSVPETLELGDK*VPEAC…	4.37189	4.17682e+06	343	280	94
EMBOSS_236_3	3	EMBOSS_236	ENSMUSG00000098178	ENSMUST00000182010	Medium	[R].LSNNRSVMP.[L]	LSNNRSVMP	AGGGCAAGTCTGGTGCCAGCAGCCGCGGTAATTCCAGCTCCAATAGCGTATATTAAAGTTGCTGCAGTTAAAAAGCTCGTAGTTGGATCTTGGGAGCGGGCGGGCGGTCCGCCGCGAGGCGAGTCACCGCCCGTCCCCGCCCCTTGCCTCTCGGCGCCCCCTCGATGCTCTTAGCTGAGTGTCCCGCGGGGCCCGAAGCGTTTACTTTGAAAAAATTAGAGTGTTCAAAGCAGGCCCGAGCCGCCTGGATACCGCAGCTAGGAATAATGGAATAGGACCGCGGTTCTATTTTGTTGGTTTTCGGAACTGAGGCCATGATTAAGAGGGACGGCCGGGGGCATTCGTATTGCGCCGCTAGAGGTGAAATTCTTGGACCGGCGCAAGACGGACCAGAGCGAA…	GKSGASSRGNSSSNSVY*SCCS*KARSWILGAGGRSAARRVTARPRPLPLGAPSMLLAECPAGPEAFTLKKLECSKQARAAWIPQLGIME*DRGSILLVFGTEAMIKRDGRGHSYCAARGEILGPAQDGPERKHLPRMFSLIKNESRSFEDDQIPL*FQP*TMPTGNAAALFP*PAGQLPGNQSLWVPGGVWLQS*NLKELTEGHHQEWSLRLNLTQHGKPHPARTRTGLTD**LFLDSVGGGAWPFLVGGAICLVNSDNERDSGMLTSYATPERSASPNFLEGQVAFSHPRLSNNRSVMPLDVRGCTRATLTGSACAYPTPAGAGNPLNPIRDGDRGLQLFPMNEEFPVSAGHKLALIKSLPFVHTARRYYRLDGLVRPTALVER*EDGRT*LSRGSK…	811.917	4.97368e+06	293	165	55.6667
EMBOSS_319_1	1	EMBOSS_319	ENSMUSG00000115092	ENSMUST00000227784	Medium	[R].VSLRMQDFPRVTPLPHQGCRPI.[G]	VSLRMQDFPRVTPLPHQGCRPI	GGTTCATCTATGAAGCAGCTGGCTCCAGAACCTTCTGCCTGCCTAAGGCCGAATAATGCTCTGCTTCTGAGTATGCTGACTTGGGTTGTCTGTTTACCTCACTGCTGGCTGCTGGCTGCTGTCCCCCTGGGAGCTCCCTGCTTGGCTGCTGTGGCTAATGCTGCCAGGAGGAGCAGCGCTGTTTTCTGTGGACCCTTGTCTAGTTGTGGCGGTTGCTGGGAAAGATGAAGTCCCCAGACTGGAGCTCAGGCTGCAAAGAGGCTGGCATGAAGCGAGATGCCCCTTCTAGGCCAAGGCAAGATCTGCTGCCCTCTGACTTCTACCTGTTGCTGAGATGACTTCTGTCGCCAAGGCACCTGGATACCGAGCCACTCCTTGACAAAAGCCCTCTCCAGCCTG…	PEPSACLRPNNALLLSMLTWVVCLPHCWLLAAVPLGAPCLAAVANAARRSVVQESLSSGPSSSSSGATSRSRRRTLGAVSTLLTDPVHHGSNDSRFPSLLCFLASTGPATTSPIWMLCKEEEWTLARTQLPPRGAWRDRFCKCLSAQSQV*NVASLELACWLPQMHHGRSSACSETVSSQEGISLLVWTRSCVCLCARARVCACARARAETKAVRDPTKTTHRFLG*AI*CAGNSIWHTGVVMAVGFITEAKTRGGGGRRRGAARGRE*FWF*SLLNLTKG*A*RMCLAAGTGRALRHHAEGAAVWLSPPTRSPSSAPCCPHTSSGPHPRLGVGWRGKRGFFADMYD*VTEKGP*PSKACNDTTLCLLLNTPDLEVTPAGLIYDMLM*LFQTPFFCLLS…	2.46079	3.88765e+06	659	10	3.33333
EMBOSS_070_1	1	EMBOSS_070	ENSMUSG00000092341	ENSMUST00000172812	Medium	[K].KLRQNAFEELE.[E]	KLRQNAFEELE	CAGGCATTCAGGCAGCGAGAGCAGAGCAGCGTAGAGCAGCACAGCTGAGCTCGTGAGGCAGGAGACTCAGCCCGAGGAAATCGCAGATAAGTTTTTAATTAAAAAGATTGAGCAGTAAAAAGAATTAGAACTCTAAACTTAAGCTAATAGAGTAGCTTATCGAAATATTACTTAGTCTTAATAATCTAAGAAGATCTTAAGAGATAACATGAAGGCTTATTTAAACAGTTTGAAAAAGGAAATGAGGAGAAAAGTATTTGTACTGTATAATGGAGGCTGACCAGAGCAGTTTAGGAGATTGTAAAGGGAGGTTTTGTGAAGTTCTAAAAGGTTCTAGTTTGAAGGTCGGCCTTGTAGATTAAAACGAAGGTTACCTAAATAGAATCTAAGTGGCATTTA…	QAFRQREQSSVEQHS*AREAGDSARGNRR*VFN*KD*AVKRIRTLNLS**SSLSKYYLVLII*EDLKR*HEGLFKQFEKGNEEKSICTV*WRLTRAV*EIVKGGFVKF*KVLV*RSAL*IKTKVT*IESKWHLKQ*SCRE*FENEV*F*KIEKSRLS*RPL*KSFDWRMYV*RHELETGKMEVLG*PGDGGARL*S*HLGGRGRRISEFEASLVYRVSSRTARATQRNPVLKKQKG*ASIWRKKIRKWK*KTKKTYRKVKKKLLEKIGK*KTKHL*KTEKVLKGTGSRKPKNRR*KEAR*KNKMEVKTTLDASIQDRQRR*D*GQKVG*DIKSEGNYL*SHKFKFLMERAV*KSL*TATYKIEASNQSY*D*SKKLRQNAFEELEEY*KP*LVA*FCLM…	45.2814	6.32808e+06	375	209	69.6667
EMBOSS_154_1	1	EMBOSS_154	ENSMUSG00000097641	ENSMUST00000180970	Medium	[R].ALWISQSNHKPP.[N]	ALWISQSNHKPP	GCACTCCTGGAGATTGAGCAGAGGGTCTTCCGTGCGCTAGATAATGACTGAGCTAGACCTCAACTATAATCCTGAAGCACTGCTATACGAGTTTCTTTTCTCACACCCAAGGGGAGGAAACCCTCCTTAAAGAAATGAAGGAACGGGTGCAATGCCAAGAGATGTGGCTCATACACTCAAACGCAGCAAACTACTTCCACAGCATCACCCCCAGGTTTTCTTTTATGTCCCAAGGGGCATATAAAAATGCTCTCAAACTTAAGCCATCACACAAATGCTAAATTACAACAGAATCTCTGGCAGAAACCGCATTTGGATTTACTGGGTTATTTAATGAATTTTCAACAGAAGCTGCTTCTGCTAAATCCAATTCAGTCATTTCAACATACAGTCTTGCAC…	ALLEIEQRVFRALDND*ARPQL*S*STAIRVSFLTPKGRKPSLKK*RNGCNAKRCGSYTQTQQTTSTASPPGFLLCPKGHIKMLSNLSHHTNAKLQQNLWQKPHLDLLGYLMNFQQKLLLLNPIQSFQHTVLHDCSRILKTIHRLLGYKNGSICKTVTNRIALKNPK**TDIS*AKGSENQENQLFIRLECSQPLATSYEYYTG*F*RHQKQENFN*ENGSIKIVLQANL*SIFFNE*LILKVVPSWLCAPGL*NKQIKQATRSKLLPQTSDQLEFLLGFPQ*TVGQNM*FK*ILSFPGCFWLWSFSTALITQNKKDYQRQMR*GQGWSKAGWEARLLQAPRTVSVLNYKALANCVPSLNDFTAVLGSRAPVTGGRETGPLGLRPPRPAPSPVSATTED…	2.14838	858985	error	44	14.6667
EMBOSS_015_3	3	EMBOSS_015	ENSMUSG00000055125	ENSMUST00000068526	Medium	[G].DLQPRGDAELWDAARGEHVGEGR.[L]	DLQPRGDAELWDAARGEHVGEGR	ACTGGAGCGGCTGGTGGGGTTTTGTCCAGGTCGCGCGGGGCGCCGAGCTCAGAGTCCGATGCTCGGCGCGGACTCGCGTAGGTGTGCGCACGGTGGCAAAGTCCCAGCCTGGGGGTGCCGGGGTGGCCGAGGAAGAGCGACTCCTTCCGGCGCGTGTGCGGGCTCTCGAGCAGCGCGCAGAAGCCGTAAACGGTGCGCGCGCGGGGCAGGTGCGGCAGCGAGAGCGCAGCCTGGGAGCGCGGGTCCCAGTCGGTGCGACCCGCGCAGTCTTCGTCACTGTCTTCGCGGTCGTCAGGGATGCGCGGCCACAGGTCCGGTTCGGCCGCGCAGCGCCAAGGCAGTGCGGCAGCGGGAAGCGGTGATTCGAGAGCGCCGGGGACCTGCAGCCGCGGGGGGATG…	WSGWWGFVQVARGAELRVRCSARTRVGVRTVAKSQPGGAGVAEEERLLPARVRALEQRAEAVNGARAGQVRQRERSLGARVPVGATRAVFVTVFAVVRDARPQVRFGRAAPRQCGSGKR*FESAGDLQPRGDAELWDAARGEHVGEGRLRSGGAKSTEKLHPSSLCPSVADTRASATQRKTVEFGLLKSSGSLL*PSGSTHKSRAPGQHESTFGASSW*QTIYMNI*KSDLFFFSLAGSD*SQERSR*RVVHS*GSTFSTAAVTVALQTYTLVEVTPRLQEANPKR*QTEPAFQPSLPTKSPAASCIGVAGAGSGTYIGCPFAGAPFTDE*RASCHHAKENLVVQSVCGLSEKVRKEEET*S*I*QLSKSDPSTGHLTHKLPWVLFFRMHTCFQAQTKL…	1.16787	43534498	126	59	20.3333
EMBOSS_022_1	1	EMBOSS_022	ENSMUSG00000090399	ENSMUST00000112103	Medium	[R].ETRETFSRGQDALR.[C]	ETRETFSRGQDALR	AGTGAGAGGCTGAAGGCCGGAGCGCGCAGCGCCGGCTGAGACTCGCGCGGGGAGCCGGCTGGGCCCCGGGAAACCCGGGAAACTTTCTGATCGCGAGGACAGGACGCCCTGCGTTGCGCTGCTCGGGCGATGCGCGATTCTGCGCGGCGGCGGCGCGGACCCACAACCCGGGACCTGAAGCGCTCCGGATCCTAGTGCCGCCCTACCTCTGCTGCTGACCATGAGTGGGATGGCCAACGTGAATTCTGCCAGCCGCCCACACTATGCTTCCTCTATCCCCGTGCCTCGAGCCTCCTCCCAGACCAGGATTCACACCCCAGGCGCATCTCCCCAGCTGCGGCCTCGCCAACAGGCTGACCTGGCCCTGAGTCCCCAGCGAGGAGCCTCCCCAAGACGGGG…	SERLKAGARSAG*DSRGEPAGPRETRETF*SRGQDALRCAARAMRDSARRRRGPTTRDLKRSGS*CRPTSAADHEWDGQREFCQPPTLCFLYPRASSLLPDQDSHPRRISPAAASPTG*PGPESPARSLPKTGQGCSLF*KLIPQGLQGKRNPQGCRASQRTGWECRKPSQLPLEQPQGNPQNSPLQSGRIQKSWGDTKHPEEEDPGRNSSSTHQRKEPTPVKLLWRNTNSRAS*RSDASWLPGKRSKKHHLQTP*VSGAG*RGSFGDFLSSVQPRAEHAVLSYSWSH*LFLSPSAESTNHSHSSPLPVQVSRGAGREGKGELCRDQGPN*RSEALVNNEWRTQGQKLGKGMAGDMGVW*TEIGL*SKACFFSPLGP*QEPGTRESILKRPFHTLLEMM…	0.862102	1.53865e+06	error	130	43.3333
EMBOSS_193_1	1	EMBOSS_193	ENSMUSG00000097542	ENSMUST00000181218	Medium	[K].RSKPQATAAR.[W]	RSKPQATAAR	CCATTTTAACTGATTTATTGAAAAATAAAAATCACTTGAAAGCATATGATGGGAATTGTACTTAACAGAAAGAGGTGTTTGAATATAGCCCTGGGGCTGGAGAGTGAGGCTGACTAACGTAGGAAAGGGGGGCGGGGGAGGGGAGGCAAAGCTAAGGTGGTGGGAAGAAACAGTACCTGCTAAAAATTCTACAGCTAACCTTTCAGCACCCCGGGGAGCTCCCAGCATCTATTTCTGGGCAGGGTTTGCCAGCTGGATTGGCTGAAGAACAGCATTCAGGTAGTTTATCTAGAAGGGTTAGGAAACGAAACGGCATCAAAGGGAACAGAGGTACAAAATCTGAAAGGATTCTCATGCTTAAACATGTTGCTAGAACCCCTATCGTGGTGAACCTGAAGT…	PF*LIY*KIKIT*KHMMGIVLNRKRCLNIALGLESEAD*RRKGGRGRGGKAKVVGRNSTC*KFYS*PFSTPGSSQHLFLGRVCQLDWLKNSIQVVYLEGLGNETASKGTEVQNLKGFSCLNMLLEPLSW*T*SHEGSSGSQLSHQLAV*LRASHFPLCSVVKAGLNANLASGPSILQRPVWQPELSQITGSAPREMSY*ESEPERPGADLSLQIASSAVWKCRAVRISPHDNEKPTPAATMSWAHRL*GSATQRQIQGTAADQNKAVPSKEMGKLHAVEGCELWQWVRGVRGTRGKATQCPAACQTTHIRCPPLKAEREHH*T**KQLFQYRGHAWYQSPRLL*GDHHHSRGQESSLLTGIK*GRPIHPLPPPPLKNR*VAYG*SPPPRDSKHPGGTGR…	6.02097	1.8733e+06	1127	46	15.3333
EMBOSS_200_1	1	EMBOSS_200	ENSMUSG00000097566	ENSMUST00000181251	Medium	[T].HSFFSNLIYATPFCIGEIKQK.[A]	HSFFSNLIYATPFCIGEIKQK	GGACCCGGGGGCGCGCGGGCCCTTGCTAGGACGCAGAGGCCGAGCGCACCTCAGCGCCCATCCGGAGCTGCCCGCTGCCGGGCAGCTCTCGGGGTCGTCGCTGCCGGAGTCACTTGGGGATGGACAGCTGATCGGCTGGTCCGACTCCCCTCCCTCCACCGCGCAGCAGCCCCGCCCGGCCCCCTACCTGGCACAGCAGGGCAGAGACCACGGCAAGGGCTAGCGCGCTCCGACGGCCCATGGTACCGCTGGACGCCCTTGCTCTCCTAGAGTATCCTCTTTTCTTTCTTCTTCAAAGACCCAGGGATGCCAGGAAAGTCTATATGACCCGAGGAGTACTGGCGGAAAGGCGTCTCTCGGCTCCAGCTTCTTCGCGGAGGGAAAGAGGAGAAAGGAGAT…	GPGGARALARTQRPSAPQRPSGAARCRAALGVVAAGVTWGWTADRLVRLPSLHRAAAPPGPLPGTAGQRPRQGLARSDGPWYRWTPLLS*SILFSFFFKDPGMPGKSI*PEEYWRKGVSRLQLLRGGKEEKGDKTQREESPDVQLNSQESLQWLPSQAY*EAAVWKSHR*GDNPGPRGARWERWWQGLRRAPWFPGPASLGSRCRSQSVLDRYLLHYRQASRLPQEFSQCHARTHTEDRRPKRGRLRAAPVLSRDLPWSDRVTAGARRRIWPGLAPATLKSCRPLA*LMRCK*AAPQSGESCHKGATFPNPPLNGSPNGQ*AVKCATLLPAPHLPAP*SSLPPPSPLRLPPPAQNPLIYIPAKRSRRRTALLPELELRPRRPPPHRHRPEDPRHAGRPE…	1.35522	1.05286e+08	1033	120	40
EMBOSS_177_1	1	EMBOSS_177	ENSMUSG00000097681	ENSMUST00000180854	Medium	[P].QPRRPPEPTR.[G]	QPRRPPEPTR	ATTCGCTCCACCACCCAGGCCTCCTGCTGAGGCACAAACAGGATCACGGTGTTTCGGGGCAGTCCAGAGGAGGCGCGGCGCGGAACGCGGCCAGAAGCCTGCACCGAGCCCTGAAGGAAGACGAGACAAAAGGGCTCCAGTGCCCCGCGCCGCGCGCGCCAGCATTTCCCACAGCCTCGGCGACCTCCGGAACCAACGAGAGGTGGGGCAGAGCGGCCTCTTGTGAAGCCTGAACCCGAGCCCTTCCTTCAGCTGGTCCACTCCGCCCGACGTACTTCCGGCGTATTAGTCCACCCTCCCATCCCCACTAGTCGGCGTCCGTCAAATCGTTCCCTGGGAAACGTAGGCTTTGAAGAGAGAGCCCGAGAGTGCAAGTTTGTTCTGGTTCTCAAAAACTAC…	IRSTTQASC*GTNRITVFRGSPEEARRGTRPEACTEP*RKTRQKGSSAPRRARQHFPQPRRPPEPTRGGAERPLVKPEPEPFLQLVHSARRTSGVLVHPPIPTSRRPSNRSLGNVGFEERARECKFVLVLKNYEAPGHCGRN*GNIPSASGTGTPPTKFCTHSRDSVYPPARV*LS*SVTITTMDWIGAQ*LPVVAIVTFLGSHAVVPSSPTGD*PHSRCHGN*EA*LYLRTGRRFLPSLFSQGINSSFSYFFLSQKRSGMIPLHTEGNKEPQPFIFV*NTSTLLRSLTLSQIQALRGLYPPSSPSSHSPPPPSFYIYRH*GSDGAKLQNQCKNPDSQSLASVASLYPPSPQHLIQKGLRLWSKTQLIPA*DLMGLSLLPEFQLPLGPTSPSS*TQKKV…	6.75755	5.94848e+06	58	550	183.333
EMBOSS_160_2	2	EMBOSS_160	ENSMUSG00000097862	ENSMUST00000181743	Medium	[K].KKPHQLPSQSETLSPQAWVGPAVS.[R]	KKPHQLPSQSETLSPQAWVGPAVS	GTAATGAAGCAATAATGGGCCACAGGTGTTCCTGAGAGGGGATGAAGAGATCAGGCTGTAAGAGGTACTGGTTCCTGTGGGACCAGAGGGGAGATGAGGGACTGGTCTGAGTCTCACTGGGAATTAATTTGCATATCTCACTCCTACCTGGTGCCAGGCAAAAGGGAGGGGGACATAGGGACAGCAGAGTCTGGGAGACCTCGAGTAAGTTGCTAGGAATGGGATTCTGACATGGAACTACAGGGATTCTAAGGAGTGGATGGTTATACTAAGGGGCACAGAAGGCCCCAGAGATGCCAGAGGATCGGGATTCAAACATACCCTACCCGATCCAACCTATTTTTGGTTCCACCAGTCCAATGCCCACACCAGAGAGAAAAAAAAACCTCACCAGCTTCC…	**SNNGPQVFLRGDEEIRL*EVLVPVGPEGR*GTGLSLTGN*FAYLTPTWCQAKGRGT*GQQSLGDLE*VARNGILTWNYRDSKEWMVILRGTEGPRDARGSGFKHTLPDPTYFWFHQSNAHTREKKKPHQLPSQSETLSPQAWVGPAVSRDKMGKQEREGPGG*KPVRSSYGIQALCPKDAEHIKLVSVETAEVLGGIVHHDAKVLEGEQWVGEGMAQGR*PSRNGDRPHCTPPPHS*AGL*TQLTRSKQEDAPSSP*GEMSG*VTCSDEKAPQR*CPFSPHLEDI*RRA*SSRGD*VSEPSAD*IQCLAPRRSTSVDLDCPWEEDSKCGLGINGQSQCPKASCAELQGLESPTVEGFDLAFFTAPASPRDPCRGNPETLVGVGLRLELLALESSPET…	1.53639	2585144	127	4	1.66667
EMBOSS_232_3	3	EMBOSS_232	ENSMUSG00000097206	ENSMUST00000180825	Medium	[R].RSLINSQTDR.[P]	RSLINSQTDR	GCTTGAGGCAGGGTCTTGCCTTAACTCAGGCTAGCCTGGAACTATGTAACCTAGGGTAGCCTTGAACTCACTGAAATTCTCCTGCCTTAGCGTTCTACAAAGGCAAAATTGATGCTTCTTCTGAATCAATACAGCACTGAAAATCAAATCACTTCAACCAAATACTATTGTTTACTCATAAATATGTGTTTATTTTTAAGTTCAATAGGTCTGAAGGATTAAAAAATATTCAGGGACAGACACAGGAATATAAATTTAAGTAAAAAAATAATTAAACTTTAAGAATCCAGCTTCATTCTGGGACTACAAAGAGAAATTTACAGATATACTACATATTTAACAGTTCAGTTTTGTAATACTAGAGGGGGGCTGCTATCAGAAAATTGTCAGCCGGGCATG…	LRQGLALTQASLELCNLG*P*TH*NSPALAFYKGKIDASSESIQH*KSNHFNQILLFTHKYVFIFKFNRSEGLKNIQGQTQEYKFK*KNN*TLRIQLHSGTTKRNLQIYYIFNSSVL*Y*RGAAIRKLSAGHAFNPSTWEAEARGFLSSRPAWSTE*VPGQPGLHREKKKKSKLSGHSYLDPTNLPVKYIRKSYLCRSYQ*WHQFIFKDYIR*AFKISKMLLQILNC*VPV*SPF*ISSLMMEKEES*DMLQL*TFLPKHERLGYSSGVFNYLTFKGLLTTHK*ILFSFHFFPPLYTINLLSTCIYL*EKFPVGFY*DLTLH*KLY*VLLKKI*NRFYLLPYFPQRTQENSTGFTIKLNLCTSFLVSQTCPKKKKKKKKKHLNR*KTCLNEFLQVRIWT…	12.1409	3.74312e+07	586	44	15.3333
EMBOSS_252_2	2	EMBOSS_252	ENSMUSG00000104667	ENSMUST00000197982	Medium	[M].MPRTHLPNLSNPVPNQSQKVPK.[V]	MPRTHLPNLSNPVPNQSQKVPK	GGCGTCCGGAACCCAGAGTCTCAGAAAAATGACAATTCGGATCGCTAGACTACAGGCCAGAGGTTGGGAGAGCTCGGCTCTTCCAAGGAGGACAGCAGTGGCAAGCCAGGTACAACATATAAATATAAAAAGAACATAAAAAGAACATAAAAAGCTTCAAAAAAGAAAAAACAAAAACAAAACCCAAAGAGGTCTTTAAAATTTTTCTGGAAGTATAAAACCATGAGAGTGCTCAGACCAAGGGTGATGCTGCAAGGCCAGAGGCAGCAGGAGGCAGACAAGCACAGCTTCTCTTCCAGAGCCTGCACCTAACAGTGTTTCTATCAGCAGCTGGATGCTCTACAGGGGAGCCACCCAAACGGCACTCTCCTTTGACAGGGAGGCGAAGAGGAAGCAGTC…	ASGTQSLRKMTIRIARLQARGWESSALPRRTAVASQVQHINIKRT*KEHKKLQKRKNKNKTQRGL*NFSGSIKP*ECSDQG*CCKARGSRRQTSTASLPEPAPNSVSISSWMLYRGATQTALSFDREAKRKQSLKLFLSAPNQGKEHSLSQAFLGMMPRT*HLPNLSNPVPNQSQKVPKVLRGRGRG*CVMKQIFI*SHHWCRFLLFICLLACSSSCMARRRP**LLEGLRSA*PA*PAVSGQILPCSPRSPSHSLADPSSQRAQASLVLAV*SP*ALPGPSLPAP*SESWLH*SWTSGKTAPPLHCQPEKSH*SWLPSLLFPSEPTALHWAHCGGLAP*LCLCISACSTCIHRSLCLVRS*WSCRSLSSPQ*TRPSAAVSTCSHRTVYEPCSFPEPGY…	3.92778	8.19088e+06	error	29	10
EMBOSS_026_1	1	EMBOSS_026	ENSMUSG00000085788	ENSMUST00000122926	Medium	[Q].SVGLYRVLCGQSVGIPNK.[A]	SVGLYRVLCGQSVGIPNK	GGACTTCCCAGTTCCTCGAATTCAGGGTGACAGTTTTTTTTCCTGCTCTGTATTGGTCTATCCTTCCAATGTAAATTCCTACTGACACAAGACCTGCTCTGTACCTGCATAATCTATCGTGGCTACCCTCGAACCTAAAATAGGAATGGGAAAACTGAGCCACACAGGTGGCAACCGGGTGTGCACCTCTGGGTGCACGTACTCCGTTCTCCAGCTTCTATTGCAGATCACTGCACAGCCACCCCTGCTCCTGGCAGACCTCTACATAAACTAGAATCGCAGCACGTACCTGATACCCAACAAAGACCGGACGAACGTAATAGATGTACCTGTAGTGCCTTCGCCAGGGCTCTAACCTGCCCAGATCTACGCTAAAATTATATACGCCAGCGCCCAGCA…	GLPSSSNSG*QFFFLLCIGLSFQCKFLLTQDLLCTCIIYRGYPRT*NRNGKTEPHRWQPGVHLWVHVLRSPASIADHCTATPAPGRPLHKLESQHVPDTQQRPDERNRCTCSAFARALTCPDLR*NYIRQRPAAKGVYLLLKSLGNVCYEDVRMCRSS*KKPATRAKRPERHSLAVLAVSLRARDDEGRREGVQRDEGQGALPADGAGHRGGTSCSWSWRLTGNFRQALCSLEAW*QSLVHRWSQVVVFLTRTSPGSFEETKHALISVNHFNNNNNKKKKKKNQKTL*DVPEGALLLDILTGFGPQHHKRKIFLDCLP*RQS*VGLYRVLCGQSVG*IPNKALR*VYRFYMRAKSQVA*IQKLTIFTSCVFDWEII*QLGALLLCGSQGLNSGVLASTY…	5.25918	6.9402e+07	error	69	23
EMBOSS_132_3	3	EMBOSS_132	ENSMUSG00000096948	ENSMUST00000181538	Medium	[K].MGELANKEEQENSYLSHNLHP.[E]	MGELANKEEQENSYLSHNLHP	GCAGACTTCAGAGTCACCGTGATCACATGGCCTCCCTCCATCCTGCGTTACTTGGACTACGCGGCATCATGGTAGTCGCTGTTTCTGGCTTTGAGTTTTCCATCTCCATGAGCTCTCACAATGCCAAACTGCATTGTCTCATGAAGAACCACTTGGAATCCCCCTGAGGTCCAGAAAACACGTCTGACATCAGCTGCCAGGCCCATCTTGCGTTTGCAGTCCAAGGTCAGTCTACAGCAGAAGCAAGAGGCATTCCCTTGATGGCACAAAGGACCAAGATGGGAGAACTTGCAAACAAGGAAGAGCAAGAAAATTCCTATTTATCTCACAATCTCCACCCTGAGTCCTGCTCTCCTAAGTGTCCCTTTCACAGGACTGTATCTGACCTACTTTCAAGCC…	RLQSHRDHMASLHPALLGLRGIMVVAVSGFEFSISMSSHNAKLHCLMKNHLESP*GPENTSDISCQAHLAFAVQGQSTAEARGIPLMAQRTKMGELANKEEQENSYLSHNLHPESCSPKCPFHRTVSDLLSSLGFPP*LSYSRYTLLHLLGNSKPHQLDNQD*PAKMVNYMLCLFYHCAILSWFCTWENPVFLNLMFYSFCM*VHCHCLQAHRKRASDLITDGCELPCGCWELNSGPLEEQSVLLTAEPSLQPPSYAL*QVFTEMMLLAYEVT*RESIHLLLLEVLHCRFIKLLDEKSESIVYLLTSGDRGCESLRT*ESSFPLLIKYFIEQVQ*QQNAFKFSLKKKNHF*RPF*SG**QTQ*RQIC*FNIIG*FHTALISFTPQVYH*MIENI*YI*Y…	2.73564	899590	93	27	9.66667
EMBOSS_252_3	3	EMBOSS_252	ENSMUSG00000104667	ENSMUST00000197982	Medium	[K].KNLEAGMGAGGIGVG.[K]	KNLEAGMGAGGIGVG	GGCGTCCGGAACCCAGAGTCTCAGAAAAATGACAATTCGGATCGCTAGACTACAGGCCAGAGGTTGGGAGAGCTCGGCTCTTCCAAGGAGGACAGCAGTGGCAAGCCAGGTACAACATATAAATATAAAAAGAACATAAAAAGAACATAAAAAGCTTCAAAAAAGAAAAAACAAAAACAAAACCCAAAGAGGTCTTTAAAATTTTTCTGGAAGTATAAAACCATGAGAGTGCTCAGACCAAGGGTGATGCTGCAAGGCCAGAGGCAGCAGGAGGCAGACAAGCACAGCTTCTCTTCCAGAGCCTGCACCTAACAGTGTTTCTATCAGCAGCTGGATGCTCTACAGGGGAGCCACCCAAACGGCACTCTCCTTTGACAGGGAGGCGAAGAGGAAGCAGTC…	RPEPRVSEK*QFGSLDYRPEVGRARLFQGGQQWQARYNI*I*KEHKKNIKSFKKEKTKTKPKEVFKIFLEV*NHESAQTKGDAARPEAAGGRQAQLLFQSLHLTVFLSAAGCSTGEPPKRHSPLTGRRRGSSH*NSFFLPQTKEKNIVSPKLSWA*CPEPDIYPICPTQFLTKARRCPKF*GGGEEASVL*NRSLFEVIIGAVSCCLFVC*PVLPVAWLGAGLDDFSKA*EVLSLLSLLCQGRFCLVHQGLQVIVWLIRHLRELKPAWSLLCDLPELFQGPLFQLPDLSHGFIKAGHLGRQLLLFIASQRSPIRAGFHHFCFHLNRLLSTGPTVGA*LLDSVCVSQHVQHVFIGAYAW*DHSGHAGP*VLPSERGPQQLCQLALTERCMSLVLSQSPDT…	3.92778	4.48514e+06	448	29	10.3333
EMBOSS_030_2	2	EMBOSS_030	ENSMUSG00000073147	ENSMUST00000101522	Medium	[A].GLADDDLMLQQRVGPESSGVAVAK.[A]	GLADDDLMLQQRVGPESSGVAVAK	AGGCTCCGGGCACCGGATAAAAGCGGAGCTGGCGAGTCCCGCGCTGTCTCGATGGAGGAGCGAGAAACGCAAGAGGTCGGGGGGAGAAGCCGCAGAAAAAATTGCAGCCATCGTCAGCGCCGCCTCCCTGCCACCGTGTATGGGGTAAAAGCTGCCGTTGCCGCTGCCGGTGCAGTCGCTGCCGCCGCCTCCTATACTTCTTAGCACCGGGGAAGGATTCCCCGCCGCGGGACAGTGTGCTGGGCGGGGAGCGGGAGTTCGTTTGTGTGGCGGTGATTAAACGAGGGAGGGACAGAGCTGGTTTCTCGAACCGAAAAGGGGAGGCCAAGGAACAAAACAGGGTTCTCCACTAAAATCACACAGCGATTACGGATCTGGCTTTGGGGGCCTTTCCCCGGA…	GSGHRIKAELASPALSRWRSEKRKRSGGEAAEKIAAIVSAASLPPCMG*KLPLPLPVQSLPPPPILLSTGEGFPAAGQCAGRGAGVRLCGGD*TREGQSWFLEPKRGGQGTKQGSPLKSHSDYGSGFGGLSPEWRFPSSWPAARPWVLRKRSGERQRRCRQPIGVW*FLSGA*GLADDDLMLQQRVGPESSGVAVAKAESEK**R*SLSPRLLWNPSSAEGSRKALPRPFAPLPARGEGPGSASARLWGAGAAVEAQFLL*LL*LRQGKMALGLLGARGERHVHRRRSACDRLHSCGVWRGPRQGGGGDRVWAEEMVVRSALAARRGRDDCLKALPLPHSPQQNCCGGGGSP*KDTPFGVCQPLVEEKV*RLLISAFLLAKYAYVRWQFPPVSQLGGPE…	2.00431	3.51564e+06	174	52	17.6667
EMBOSS_289_1	1	EMBOSS_289	ENSMUSG00000112547	ENSMUST00000219127	Medium	[S].RSPYQDPDQKLLSPSLQR.[R]	RSPYQDPDQKLLSPSLQR	TTTTTCTGCCTTCTGCCCTCCTAAGCCTACGTAATAGGGCGTGGCTGTGGAGAGAGGGAGGGGCGGGGAGTTTGTTGGAGCTGAGTGCTTGGGAGAGGCACCGCTTCGGAAGGGGAGGAAATGATACACAGGATGAAGATGAAGAGGACGACGAAGAGGAGGAGCTTGAGCTATCTGAATCTGTTTCACTGTCCGAATCCGAGTCCAAGGAGTCCGAGGCCTGCAGCACTGGCGGCGGCTCCGCGGCGTTCGGGCCGGGGACGCAGACCCCGCTCGGCAGCGGCGGTCTTCCGCCGGGATCCGAGTTCGGGGCTGGCGGCGGCGGCGGTCTTCCCCCGGGATCCAAGTTCGGGGCTGGCGGCGGCGGTCTTCCCCCGGCATCCGAGTTCGGGGCTGGCG…	FFCLLPS*AYVIGRGCGEREGRGVCWS*VLGRGTASEGEEMIHRMKMKRTTKRRSLSYLNLFHCPNPSPRSPRPAALAAAPRRSGRGRRPRSAAAVFRRDPSSGLAAAAVFPRDPSSGLAAAVFPRHPSSGLAAAAVFPRDPSSGLAAAVFHRHPSSGLAAAAIFRWDPSSGLAASVFRRRPSSGLAEAAVFRRDPSSGLAAAAAPPAAGPPGAPEVAAKLPTPGLSHRT*ASAVARWPPPPPWRSPGRRAARGSPQKPS*PTRPR*NPSNEFLILGLLDLSG*I*EYKYNA*ALV*GHYKENSSNNVSM*LVVLGFSRVTELMDSLYIVKEFIDDLQSAVQFPTMVQ**L*MEVQGSSSYSIPNGKQERGKSETPCFQCPYIVSSRRCSPD*RCVPPH…	3.25395	5.50539e+06	422	121	40.3333
EMBOSS_299_1	1	EMBOSS_299	ENSMUSG00000108621	ENSMUST00000188038	Medium	[F].AFNIKPRFFDK.[V]	AFNIKPRFFDK	CGGACACGGGTACGAGTGGGCCCCGCTTTCGGCGCTGGTACCAGGAGCTCTGAGAGGAACGTGGGCGAGCTCGGAAGCTGCGCCATGGATCTCGGGTTTCCCAAGTTGGCCTCAAACTTTCTCTTAGCTGAGGAGGACCTTGAACTTCTGATCCCGCTACCCAAACCCACCTCCAGAGTGCTGGGATTAAGGGAGTTTTTGGCCTTTGAGGATGTGGCTGTGGAGTTCAGCCAGGAAGAATGGGTTTTGCTGGATCCTTCTCAGAAGAAACTATACAGAGATGTGATGCTGGAAACCTGCAATAACCTTTCTTCAATAGGCATCAAATGGGAAGACAAGAACATTGACGAGCAGTACAAACACTCTTGGAGATTCCTAAGGGGACAAACCATCTGAACA…	VLCVGSPWRTRVRVGPAFGAGTRSSERNVGELGSCAMDLGFPKLASNFLLAEEDLELLIPLPKPTSRVLGLREFLAFEDVAVEFSQEEWVLLDPSQKKLYRDVMLETCNNLSSIGIKWEDKNIDEQYKHSWRFLRSCMIDAIYEHREGGQFQETFTWIPDFHRSTDISTEVKPFECGVCGKVFTCHSSFNEHIMSHLGDKPSEHKHGSCGIQQQSQSVEKSYKQCGMAFACHCSLSIDGRTNSKDKCYKCEQSSKALSSSSSLQSHKTVYGAGRTYECEECGKSFRHESSFLLHQLTHIGRKSYECKQCGKAFRCHSYLQLHENFHIEENPYECKQCGKTLCSPSSLRVHERIHNGEKLYACKRCDKTFKCQSYLRIHERTHTGERCYDCEQCGKAFRS…	3.54781	6.66559e+06	error	85	28.3333
EMBOSS_341_2	2	EMBOSS_341	ENSMUSG00000113204	ENSMUST00000222254	Medium	[K].NSYWRETVTPMGTWSHVRIIQ.[V]	NSYWRETVTPMGTWSHVRIIQ	AGGCGGATGAACAGCCAGAGCTGCAATGGTGGATCCTCCTCCAGGGCTGCATGGGACGACAGATAGATGAGGCTCTAGGACGGGCACAAATGCTACCCGAATGCAAACCACTCCGGAGATCTGTAAAAGGACTGGCCCCGGACAGGAAGCACACTTTAAACTAGAGGCGGGGTAAGACTCGTGGGCCAATCAAGGCTTCCGAACAGAACTGCCATTCTGGCAATGAGGCGGGGTCTTCCGGTTGCCTGCTGGAAGTTTGTTTTTGCTCTGCAGGATTGAAGGGTTCTCCCTATGCTGCTTTGAGCGCTGCTATTGGGTGCCTTGAGGGGACCTCAAGTAAGCTCCATTTTTGAAACATGAGTCAAAGCCCCGGTGAAGATTCTGTGACGGTTCATTGTA…	EVCFCSAGLKGSPYAALSAAIGCLEGTSSKLHF*NMSQSPGEDSVTVHCIIYDDED*VAFCGKEMLRYLRH*EICHADMHTGRGSTQTDENLQELDHLSP*KVKSTVSQTKDGKCS*HQYYPRLQSHWIAGCSDL**CACELH*GRVGFAGSFPEKSL*RGDARDIPEHHCYRLQLGRPSY*RTLSKF*KT*KA*KNSYWRETV*T*PMG*TWSHVRIIQVVLVLKA*RCHEEQLRLGPMKGA*VRLSVKPSCRRRTQHIEDASPMG*AERTAQ*SGVNQSLE*YRGQS*RSDLISLEDCRRSCVDPRHWSKKL*H*GYLPDPKIFEMSELWGTCSGKPAKEKELCCS*QSIKGVGDLKNALT*HMEMQFQDFQVDFWFCFRPVIPHDDILEW*SLCCE…	7.1318	1.46487e+06	error	7	2.66667
EMBOSS_155_2	2	EMBOSS_155	ENSMUSG00000096948	ENSMUST00000181765	Medium	[R].AQDSHFAIR.[I]	AQDSHFAIR	GCAGACTTCAGAGTCACCGTGATCACATGGCCTCCCTCCATCCTGCGTTACTTGGACTACGCGGCATCATGGTAGTCGCTGTTTCTGGCTTTGAGTTTTCCATCTCCATGAGCTCTCACAATGCCAAACTGCATTGTCTCATGAAGAACCACTTGGAATCCCCCTGAGGTCCAGAAAACACGTCTGACATCAGCTGCCAGGCCCATCTTGCGTTTGCAGTCCAAGGTCAGTCTACAGCAGAAGCAAGAGGCATTCCCTTGATGGCACAAAGGACCAAGATGGGAGAACTTGCAAACAAGGAAGAGCAAGAAAATTCCTATTTATCTCACAATCTCCACCCTGAGTCCTGCTCTCCTAAGTGTCCCTTTCACAGGACTGTATCTGACCTACTTTCAAGCC…	QAEVARQPLSFSTGTCEDCI*PTFKPGFPSLIKLLSIYPPTSPRQFQAPST*QPRLTSKDGKLYAVFILPLCYSVLVLYMGKPCFP*SHVLFFLYVSTLSLSSGTPKEGIRSHYRWL*ATLWLLGIELRTSGRAVSALNC*AISPAPFLCFIAGFHRNDAFSI*SNLKGEHTLAPS*SFTLQIYQAT**KIRINSVFTYFRGQRM*ELKNIGVFFPPTN*ILY*ASTIATKCIQIFSKEKKSLLKAFLVRLMTNTIKADMLV*HNWLISYSTYIFYSTSISLNDREHLIHLIQLFLHN*PMDF*EKKILQTPVFYTHPNGLTLKRIEPMPFLTRAQD*SHFAIRICICDPL*ALRQDSNILKEAQGTL*SPIQQQ*ALHSKLSHPRN*IRSPTFMGISS…	2.73564	1.03276e+06	error	27	9.33333
EMBOSS_318_3	3	EMBOSS_318	ENSMUSG00000116295	ENSMUST00000229245	Medium	[A].GEMAQWLR.[A]	GEMAQWLR	CGTGAACCAGCGTGGCCTTAACCAGCCATAGTTATGATATTATAAGACCTGTGGGTGTCTGCCTGACCTGTAGTCTGAAGATGCTCTTTCTGAAGTCTTAGGAGGGCCCCTCAGTGAGGATGCCCGAAGCTGAAGGCTTTACTTCTGTTTCAAGAGGATCCAAGCGGCTCCCAGCACCCACGCCAGGTGGCTCCCAAGGACGTGTAACTTCCCTTCCAGGGGATCCAGGTACACAATGCAGACGCAACATATAATCAAAAAAATATAGATGTATAAAAAGAAGCTGAGGCTAGCTCCTTCTCCCCACGCTCCTTCCCTCCCAACGGGAATGGCAGGGGCTTCTCTCAAACCTACTTTACATGTACTGCAGCC>ENSMUSG00000113204|ENSMUST…	REDGGGREPAWP*PAIVMIL*GSFPCRPVGVCLTCSLKMLFLKS*EGPSVRMPEAEGFTSVSRQ*TRRVV*RYTTPRQDCVVLTCHEQSSNSIQALKTRAMDQYGGWHVCACSRSATHHGGKS*LESWALAGQLGA*KIFE*GAGEMAQWLRAPTALLKVPSSNPSNHMVAHNHP*RNLMPSSGVSEDSYSVLTYNK	3.64102	15616716	145	34	12
EMBOSS_404_3	3	EMBOSS_404	ENSMUSG00000113204	ENSMUST00000222377	Medium	[R].EGDRVLPMLL.[A]	EGDRVLPMLL	AGGCGGATGAACAGCCAGAGCTGCAATGGTGGATCCTCCTCCAGGGCTGCATGGGACGACAGATAGATGAGGCTCTAGGACGGGCACAAATGCTACCCGAATGCAAACCACTCCGGAGATCTGTAAAAGGACTGGCCCCGGACAGGAAGCACACTTTAAACTAGAGGCGGGGTAAGACTCGTGGGCCAATCAAGGCTTCCGAACAGAACTGCCATTCTGGCAATGAGGCGGGGTCTTCCGGTTGCCTGCTGGAAGTTTGTTTTTGCTCTGCAGGATTGAAGGGTTCTCCCTATGCTGCTTTGAGCGCTGCTATTGGGTGCCTTGAGGGGACCTCAAGTAAGCTCCATTTTTGAAACATGAGTCAAAGCCCCGGTGAAGATTCTGTGACGGTTCATTGTA…	KGKEQAAEQPELKCCVLSHRLEDRLKY*WSASQSRDLEKA*PKTGSSI*PREGD*RVLPMLL*ALLLGALRGPQVSSIFETWMQ*LMMMCV*TSLRKSGICWILPRKVSMKR*C*RHTRTSLL*ATIGKTIILKNIVKVLEDMKGMKEFILERNRMNVTNGVKPLQVTIISKYVKEQILERNLMNVINVVKPFHNRVVSSIIKEHMLDRX	7.1318	1.78975e+06	error	7	3
EMBOSS_054_2	2	EMBOSS_054	ENSMUSG00000073164	ENSMUST00000130361	Medium	[F].TREEWNLLHPSQKSLYK.[D]	TREEWNLLHPSQKSLYK	GCGCGCCCGCGTGTGGGCTCCTTTGCAGAGGACTCGGTAGCTGCAGCTCCCGGAGCACAGCGGACAGAGCTGCGGGCTGCGTGCGCCCCTGCTGCCACCGGGCCTGCCGCGGTGGCTCCCGCGCCCCGCGGCGACTTCCGCTCCCGCGCTTCTCTTTGTTCAAGTCCCCGAGCGGCGGCGGGGTCGGAGCCCGCGCCTTGGGCGACTGAGGCGGCCGCAGTCCGCGCCCCGGCGCCCTGGCGATGCCGGACCAGATCTCTGTGTCGGAATTCGTGGCCGAGACCCTTGAGGACTACAAGGCGCCCACTGCCTCTAGCTTCACGCGCACGGCCCAGTGCCGGAACACCGCGGCGGCCATCGAGGAGGCTACACTTGGGAAAACCATCATATTGAAAGACA…	GRSPRPGALAMPDQISVSEFVAETLEDYKAPTASSFTRTAQCRNTAAAIEEDAVTYDDVHVNFTREEWNLLHPSQKSLYKDVMLETYWNLTVIGYTWENHHIERHCQSSRRNESASCSCPIVDRETRQSSATHVPGVMSQPWMLLGFWLGGLKCPGFRRSA*EETV*VTFDLIPDPRLWTHILDNFGDCDYISPTSCDQSVNTSNACSW	8.10613	5468788	64	243	81.3333
EMBOSS_006_3	3	EMBOSS_006	ENSMUSG00000021268	ENSMUST00000143272	Medium	[P].VWVPQLQGDERQQVR.[G]	VWVPQLQGDERQQVR	GACTTTTGGTAAATCACCTTTTGCCGTTTCCTTTGTCCCCGTGAAGCCCCCCCTGGCCGCCCCCTCCTCATTCTGGGCTGGCTGGCTGAGGGGGGGGGCAGCCTGAGGGCTGCGACGTGGCAGGTTTCTAGAATGTTCTATTGATGGCCGCAAGAGGGCGCTGGTGGCACTGCGGAATTTTGGGGGGCGGGGTGGGGAGGGAAGAGGAGGTGGCCTTTGTTCTCCTGCAGGAGGGGGTCGGGAGCGAGATGGGTTGCGGGACCATGGGTTCATTTACCTATGGGGAAATGTTAGTAGATACCTGGATTCACTAAGGTGCGCTTGCAGGACTTACAATAGGTCAGAGATGGCGTCATCTGCAGTGGCTGTGTGATTTAGGGTGTCATGGACGCAGATTAA…	LLVNHLLPFPLSP*SPPWPPPPHSGLAG*GGGQPEGCDVAGF*NVLLMAARGRWWHCGILGGGVGREEEVAFVLLQEGVGSEMGCGTMGSFTYGEMLVDTWIH*GALAGLTIGQRWRHLQWLCDLGCHGRRLIYFQ*FVFSGVLERCGFLRKNCKKY*LIRRHP*GS*ELTWQRGGKVLRRRVLIGWGEAGWSAFILSYS*RPQK*VFCIKN*VFKF*LCLIGFTNGGWGQRPAFTYQE*NCGLGAAPYCRVSLVQGGSWMPVCVLRHVWKMAQAEAMGVHSDP*RWLMWALPPPPKPETCWAPSPLLRQSSSSSCVLAPVGVPQVVGLLES**VRAARPLAVSMCKWFLACQTSARVAHAHTANTCDLSINSSVPLPLLSSPPISPPTSPPISTFPLP…	6.90162	2.07409e+07	1353	133	45
EMBOSS_057_3	3	EMBOSS_057	ENSMUSG00000064263	ENSMUST00000079720	Medium	[K].TKLQPTGLPSSHSL.[K]	TKLQPTGLPSSHSL	TTTCAGAGATGCAGTGACTCTGCCAGATGCTTCAGTGTCTCCCAGGAGGCAGGTTTTGCAGTGCATGGAGAGGAACCAGCTGGCAGAGAAAGCAGGTTCAAGCTCAAGCAGCAATCAGATCATGTAGAATGACCACAGCCAAATGCACAAGCCCATTTGAGAAGCAAGGGAATGTCTTGTGTGATCCCAGAATCCCAGGTCCCGGGAAGACAGAAATGTTGCTGAGACCCCGTGGCAGCTTGGGTTCAAGCAAGACAAAGCTGCAGCCAACAGGGCTGCCATCTTCTCACTCTCTAAAGGAATGTGAGAGGGTGACCACCCTACAACCCAGGGAAATGGGTTCTTGTTCTAGCCTGGTGTTGGAGAATCACTCTCTGCATCTGGCCTGACACCAGCCAT…	SEMQ*LCQMLQCLPGGRFCSAWRGTSWQRKQVQAQAAIRSCRMTTAKCTSPFEKQGNVLCDPRIPGPGKTEMLLRPRGSLGSSKTKLQPTGLPSSHSLKECERVTTLQPREMGSCSSLVLENHSLHLA*HQPSTSSSKGTRKSHGQPGQQASGICKGDDSQQTSTVGHEAEAKLPSVSSSSLVVAVFMSVIYV*VSP*ALADLGDY*MYDLSI	1.66145	1.19232e+07	85	9	3.66667
EMBOSS_404_3	3	EMBOSS_404	ENSMUSG00000113204	ENSMUST00000222377	Medium	[-].KGKEQAAEQ.[P]	KGKEQAAEQ	AGGCGGATGAACAGCCAGAGCTGCAATGGTGGATCCTCCTCCAGGGCTGCATGGGACGACAGATAGATGAGGCTCTAGGACGGGCACAAATGCTACCCGAATGCAAACCACTCCGGAGATCTGTAAAAGGACTGGCCCCGGACAGGAAGCACACTTTAAACTAGAGGCGGGGTAAGACTCGTGGGCCAATCAAGGCTTCCGAACAGAACTGCCATTCTGGCAATGAGGCGGGGTCTTCCGGTTGCCTGCTGGAAGTTTGTTTTTGCTCTGCAGGATTGAAGGGTTCTCCCTATGCTGCTTTGAGCGCTGCTATTGGGTGCCTTGAGGGGACCTCAAGTAAGCTCCATTTTTGAAACATGAGTCAAAGCCCCGGTGAAGATTCTGTGACGGTTCATTGTA…	KGKEQAAEQPELKCCVLSHRLEDRLKY*WSASQSRDLEKA*PKTGSSI*PREGD*RVLPMLL*ALLLGALRGPQVSSIFETWMQ*LMMMCV*TSLRKSGICWILPRKVSMKR*C*RHTRTSLL*ATIGKTIILKNIVKVLEDMKGMKEFILERNRMNVTNGVKPLQVTIISKYVKEQILERNLMNVINVVKPFHNRVVSSIIKEHMLDRX	7.1318	3.70702e+06	1	7	3
EMBOSS_006_3	3	EMBOSS_006	ENSMUSG00000021268	ENSMUST00000143272	Medium	[R].ENKWGQSLGA.[R]	ENKWGQSLGA	GACTTTTGGTAAATCACCTTTTGCCGTTTCCTTTGTCCCCGTGAAGCCCCCCCTGGCCGCCCCCTCCTCATTCTGGGCTGGCTGGCTGAGGGGGGGGGCAGCCTGAGGGCTGCGACGTGGCAGGTTTCTAGAATGTTCTATTGATGGCCGCAAGAGGGCGCTGGTGGCACTGCGGAATTTTGGGGGGCGGGGTGGGGAGGGAAGAGGAGGTGGCCTTTGTTCTCCTGCAGGAGGGGGTCGGGAGCGAGATGGGTTGCGGGACCATGGGTTCATTTACCTATGGGGAAATGTTAGTAGATACCTGGATTCACTAAGGTGCGCTTGCAGGACTTACAATAGGTCAGAGATGGCGTCATCTGCAGTGGCTGTGTGATTTAGGGTGTCATGGACGCAGATTAA…	LLVNHLLPFPLSP*SPPWPPPPHSGLAG*GGGQPEGCDVAGF*NVLLMAARGRWWHCGILGGGVGREEEVAFVLLQEGVGSEMGCGTMGSFTYGEMLVDTWIH*GALAGLTIGQRWRHLQWLCDLGCHGRRLIYFQ*FVFSGVLERCGFLRKNCKKY*LIRRHP*GS*ELTWQRGGKVLRRRVLIGWGEAGWSAFILSYS*RPQK*VFCIKN*VFKF*LCLIGFTNGGWGQRPAFTYQE*NCGLGAAPYCRVSLVQGGSWMPVCVLRHVWKMAQAEAMGVHSDP*RWLMWALPPPPKPETCWAPSPLLRQSSSSSCVLAPVGVPQVVGLLES**VRAARPLAVSMCKWFLACQTSARVAHAHTANTCDLSINSSVPLPLLSSPPISPPTSPPISTFPLP…	6.90162	1.29018e+07	error	133	45
EMBOSS_142_1	1	EMBOSS_142	ENSMUSG00000097876	ENSMUST00000180999	Medium	[R].EHQLMLEQQS.[T]	EHQLMLEQQS	GGTCGAGGGGCGGAGCCTCGATGAGCTTTGAGGATTTTACTGTTTTGTTTTGTGCTGTGCTGTAATGTAGACAGATTTTATAAAAATCATCCCATGGTCGGAAGCTGTTCCGGCTCTCTCAGCACAGTGACTAGTCTGAGCAAGCTGCGAAACAAAGCAGACGGCGTCCGTCTTTCAGAGAATTATCATTAACGACTCTGGTGTGAAATTTGCTACAGCGTAACTGAAATCATGCACCAGTGTAGAAGCCACAGATACCAGGAAGATGCTCACAGATGACACTGTTCCAGGAGCGGAGCACCTCAGTGCTCTCCGCCAACACCCACTCACCAAAAGCCAGAAGGAGCCTGCACTTAATGGGCTCTATTAATTCAGGGAAAGTGATGCTTGATGTCCGGC…	GRGAEPR*ALRILLFCFVLCCNVDRFYKNHPMVGSCSGSLSTVTSLSKLRNKADGVRLSENYH*RLWCEICYSVTEIMHQCRSHRYQEDAHR*HCSRSGAPQCSPPTPTHQKPEGACT*WALLIQGK*CLMSGLLIQVWMLTTSFLSSSDMDELSISSGREEKG*GHQHLLSM*HFLACDTS*HVDTS*HVNTS*HVNTS*HVDTS*HVNTSYHVNTS*HVDTS*HVNTS*HVDTS*HVNTS*HVDTS*HVNTS*HVDTS*HVNTS*HVNTS*HVDTS*HVNTS*HVDTS*HVDTS*HVDTS*HVNTS*HVDTS*HVDTS*HVDTS*HMDTS*HVTLLSMWTRLSMWTLLSMWTHCLATTNYWLCS*SRA*Q*ETKGSTSNPAGSVTETRETTLTVSKS…	1.18069	3.91126e+06	error	21	7
EMBOSS_172_2	2	EMBOSS_172	ENSMUSG00000097039	ENSMUST00000181657	Medium	[A].SVVFKQNLDPFSTGAPGAHAPTLVSKHPLQFLFDK.[K]	SVVFKQNLDPFSTGAPGAHAPTLVSKHPLQFLFDK	GAGCACATGGACCCACTGGTCAAGCGGGCTCGGCAAGGCCAGGATGAAGAGAAGCTACGAACTTAGCATTCCCAGAGCCCCCCGAGTGGATATCCGCGTGGAAAGGATGTTGGCAGCCCCGGTGACCTCGGAGTCACGGCTGGATCCACCCTCTTGTCTGATTTTCTTAACTCTACTACGGTAAGAAGATGCCCTCCATCAGCAGGCCGTGTCTGCTGGGACCTCTCTGGAGACTTCCTGAACCCTGTGGATTTACAGTAAGATGCAGTTTCCTGGGGAGTAATTCTGGTGGATACAAATTCCGGAGTATTACACCTGGCTTGCCTGGAGATGTTACAAGTAGCTGGATGGATTCTTCAGCCTGGATGCCCACTGAAAACAAGGACCGAAACTAAGAGG…	LVKRARQGQDEEKLRT*HSQSPPSGYPRGKDVGSPGDLGVTAGSTLLSDFLNSTTVRRCPPSAGRVCWDLSGDFLNPVDLQ*DAVSWGVILVDTNSGVLHLACLEMLQVAGWILQPGCPLKTRTETKRIVSLPLTQ*ECLLSSLGLPGAPSKM*APKTHLLSMQCFWYYTL*AFQKDFEILS*IKGGIFGDLEN*DVKR*LKRCQVTQQMSHRR*IAKMEVFMPEAIL*DS*VLQSW*ETDLLR**IQP*Y*P*ENETLCRRQKIPETGKGA*KS**E*RRSWQSSLPPHYERHPTESKFPPHFQLDSFLSPNCGL*CLQQWY*LVLGTWRHSSHVEPMR**KTMQLETRMEEKKKLDP*LNCRWGIVHHPRAKTTSRFLVW*NKS*LFTFPRVELSLA…	2.01096	766618	error	7	2.66667
EMBOSS_404_3	3	EMBOSS_404	ENSMUSG00000113204	ENSMUST00000222377	Medium	[R].EGDRVLPMLLALL.[L]	EGDRVLPMLLALL	AGGCGGATGAACAGCCAGAGCTGCAATGGTGGATCCTCCTCCAGGGCTGCATGGGACGACAGATAGATGAGGCTCTAGGACGGGCACAAATGCTACCCGAATGCAAACCACTCCGGAGATCTGTAAAAGGACTGGCCCCGGACAGGAAGCACACTTTAAACTAGAGGCGGGGTAAGACTCGTGGGCCAATCAAGGCTTCCGAACAGAACTGCCATTCTGGCAATGAGGCGGGGTCTTCCGGTTGCCTGCTGGAAGTTTGTTTTTGCTCTGCAGGATTGAAGGGTTCTCCCTATGCTGCTTTGAGCGCTGCTATTGGGTGCCTTGAGGGGACCTCAAGTAAGCTCCATTTTTGAAACATGAGTCAAAGCCCCGGTGAAGATTCTGTGACGGTTCATTGTA…	KGKEQAAEQPELKCCVLSHRLEDRLKY*WSASQSRDLEKA*PKTGSSI*PREGD*RVLPMLL*ALLLGALRGPQVSSIFETWMQ*LMMMCV*TSLRKSGICWILPRKVSMKR*C*RHTRTSLL*ATIGKTIILKNIVKVLEDMKGMKEFILERNRMNVTNGVKPLQVTIISKYVKEQILERNLMNVINVVKPFHNRVVSSIIKEHMLDRX	7.1318	4.59395e+06	error	7	3
EMBOSS_074_1	1	EMBOSS_074	ENSMUSG00000092274	ENSMUST00000173672	Medium	[R].FHCIAQTGLEFKDLLMTASQMCLGLEVCACAPSTCLRVWF.[I]	FHCIAQTGLEFKDLLMTASQMCLGLEVCACAPSTCLRVWF	GAGTTAGTGACAAGGAGGGCTCGCTCTTGGGGCTAGTGGTGGGGAGGCAGTGGCCAGTTCAGGGCTCAGATGAGAGAGGTGGCAGAATTAGAGGCAGCCACTAGGATGGGGGTGCGAGGAGAAGCGGGGCTAAGTATAAAGGAGACTAGATTTTGGGACAGTGGACGTGTGGAAGGCAGCTTCCAAAGCGCCTTTAACAATCCACAAAGAACCAGCAGCTTTCAAGACCAGGCTATCCCTGCTGTCTGCTGGCACTTGACGTCCAGGAGGGCACAAGTTTCACAGGCCTACATGGGGGCAGTGTCCTAACTTGAGTGGCAGAGCAGCAGTTGATGGAGACGGGTGGACTGGGGGCCCTTGAAGGCCCCGGAAATCATAGAGGACAGGCAGTGGGGCAGG…	RS**QGGLALGASGGEAVASSGLR*ERWQN*RQPLGWGCEEKRG*V*RRLDFGTVDVWKAASKAPLTIHKEPAAFKTRLSLLSAGT*RPGGHKFHRPTWGQCPNLSGRAAVDGDGWTGGP*RPRKS*RTGSGAGLGA*WRSPLILTKPADPFFSR*GVVNPPGDEAWSYGRWT*LRWADSSGPGWYVIWVWPVCTHFGVRGEAGGGCRDKLFLLSGLPGGDHGD*RRKSWGHINHNFIFQIAVPSLDFA*VPCFLFCGLTLPYSCPSL*G*GVT*NLAPGSSGKPVEDVESVLESWARHFGKGGGHPDWAGRDGVDSQRAGRECGPWGGLTAMFPVTQMLHGRGLSL*CSPWQADGTRRYGAPASVSRSSAGGLTLEETAASVDAYTVNSRGLGSASLP…	3.29151	672322	1388	70	23.3333
EMBOSS_221_2	2	EMBOSS_221	ENSMUSG00000097519	ENSMUST00000181949	Medium	[I].DKQGSMQAYMVLEEPR.[V]	DKQGSMQAYMVLEEPR	GGAGGAAGGACGTTTGTGGTTGGCGGACTCAGCCCCGGCCGGGAAGTTCGAACGGACGTGGAAGAGCCCGCAGGTTGGGCCCATGCACAGCAGCAGCTGCTCAGGGTCAGAGTTTCCTCGGGTTCTGTATAAAAGCTTTGGTTGACTGATTAGTGAAATAATCATATGCTGAAGAGAACAGGAAGTACTTGTGTTTAGAAAAAAAAGTAATTGCAGCAAATGCTAAATATCTCAAAGTAGGCTTAGTATCTCTAAGATAATTGAGGCCTTTGAGAAATACAAAAGAAGAACCGAAGAGCAAAGAAACAAGCTGAAGTAAGGAGAGCGCCCCACTCCCCAGTCCAAGATTTCTGCTGCCCTACAGGAGACATGTTCTTGGGAAAGCAGCATCTCTCTCAA…	EEGRLWLADSAPAGKFERTWKSPQVGPMHSSSCSGSEFPRVLYKSFG*LISEIIIC*REQEVLVFRKKSNCSKC*ISQSRLSISKIIEAFEKYKRRTEEQRNKLK*GERPTPQSKISAALQETCSWESSISLNSSLKMK*AISAQ*LPCYDKQPRLEVKMLSFFFEPRRRCCQEQTCLIVK**NNIKCNILWISDAFEDSIYEIIHFLFHLPKLMYPHHSPVHCLASLCLCMSYRWENRN*SYLQN*QDSEWKWPEYESSFFVLPAKWPGTK*PF*ASVSP**KSS*YLFCV*QNP*FKAVMFNMYS*AKVILCCHEHLNIF*DPVF*KCVFLCLGNSNYT*HDG*FST**NLAWWGWEEASGRELC*LY*GGKPFLLWVVPSLAWLLDCVSGESELGT…	0.861642	3.72154e+06	574	83	28
EMBOSS_289_3	3	EMBOSS_289	ENSMUSG00000112547	ENSMUST00000219127	Medium	[P].NNGSVVAMNGSPR.[I]	NNGSVVAMNGSPR	TTTTTCTGCCTTCTGCCCTCCTAAGCCTACGTAATAGGGCGTGGCTGTGGAGAGAGGGAGGGGCGGGGAGTTTGTTGGAGCTGAGTGCTTGGGAGAGGCACCGCTTCGGAAGGGGAGGAAATGATACACAGGATGAAGATGAAGAGGACGACGAAGAGGAGGAGCTTGAGCTATCTGAATCTGTTTCACTGTCCGAATCCGAGTCCAAGGAGTCCGAGGCCTGCAGCACTGGCGGCGGCTCCGCGGCGTTCGGGCCGGGGACGCAGACCCCGCTCGGCAGCGGCGGTCTTCCGCCGGGATCCGAGTTCGGGGCTGGCGGCGGCGGCGGTCTTCCCCCGGGATCCAAGTTCGGGGCTGGCGGCGGCGGTCTTCCCCCGGCATCCGAGTTCGGGGCTGGCG…	FLPSALLSLRNRAWLWREGGAGSLLELSAWERHRFGRGGNDTQDEDEEDDEEEELELSESVSLSESESKESEACSTGGGSAAFGPGTQTPLGSGGLPPGSEFGAGGGGGLPPGSKFGAGGGGLPPASEFGAGGGGGLPPGSEFGAGGGGLPPASQFGVGGGGDLPLGSELGASGVGLPPASQFGVGGGGGLPPGSEFGAGGGGCSPGGGASRRS*GGGEAADPWPEPPNLSVCSCSVASTTSMAQPRAQSSARVPSEAELANAAALKSQ**IFNSGSIRPQWINIGV*IQCLSFGLRPLQREFK*QC*YVVSCIRVL*SHRTYG*SLYSKGIY**LTVCSPIPNNGSVVAMNGSPRI*QLLNPKRQAGEGQERDSLLPMSLYCLQQKV*PRLKVCSTTP…	3.25395	4349788	344	121	41
EMBOSS_298_3	3	EMBOSS_298	ENSMUSG00000101338	ENSMUST00000189480	Medium	[N].LKQLSLLLQGREASSQPLGR.[L]	LKQLSLLLQGREASSQPLGR	AATGAAGCATCTGGAAGCAACTGGAGCTGCTGCTTTGGAGCCCTCAGATCAGGGGAGGAGGAAATCTGAAACAACTTTCCTTGCTGCTTCAGGGAAGAGAGGCAAGTAGCCAGCCACTGGGGCGCTTGGCAAAGCAGTGAACAGCAGCCTGGATTCACCTGACGCCTGGCGTGAGGAAAGAGCTGGCAGGCATCCTGCCTCAGCCATCTGTGCCTCCGCTCCTCACCAAAGTGGGAAAGCATTTCAAATAAACGATTTTGAACGCACGTTCGAACCATTCAAGTTCTCACGACCTCACAAGAGAAGGGCCTCAGGGACTCGCACTGTCGGCTGCTGGAGGGAGAGCTGATGAACAATATTCTCTGAGCTTGTTCAGAAAGAAAGGGAAGAACCCGGACA…	*SIWKQLELLLWSPQIRGGGNLKQLSLLLQGREASSQPLGRLAKQ*TAAWIHLTPGVRKELAGILPQPSVPPLLTKVGKHFK*TILNARSNHSSSHDLTREGPQGLALSAAGGRADEQYSLSLFRKKGKNPDRTQIVSERWESPCRWWNHMARLWAE*AS*LKLALEYGTPTAVDRMFKL*HLICKPSINLFCFFFSVPLP*TRLLKGPRSTPX	1.09893	506086	22	2	1.33333
EMBOSS_261_3	3	EMBOSS_261	ENSMUSG00000102869	ENSMUST00000192863	Medium	[H].LGSEIVNIPQK.[H]	LGSEIVNIPQK	GAGAAGAATTGCCAAGTCAGTTCCGGCAGAGAGCGCAGCGAGCTCGGGAGTGTGGCCTTCTTCGCCCCGGGCCCCTCACGGCCTCGGCCCGCGCCGGGTGAGCCCGAGGGGCCCGGGAGCAGCCTCGGTCCCTACTCTGCGGACGCCAGGAGCCCTCGCCCTCGAGGCAGCCACCGGCTAGGCCACGCGGCCATTCCGCAGCGACTCTTGCCCTGCCAACGATGCGCCTGCATGGCGGCGGCCTCCCCGACTCCACCGGCGCCCTCTCTCCAGGGCCGGGCCCACCGAGGAGTCCCAGCCAGGCCTTCGAGGACGCCTCGAAAGTGGCGGCGAGCGTGGCATGACGGGAAGAATGGCATCCACCTGAAGGCCAAGGCTGGGCCTTCGGGGCTTCTGCGG…	EELPSQFRQRAQRARECGLLRPGPLTASARAG*ARGAREQPRSLLCGRQEPSPSRQPPARPRGHSAATLALPTMRLHGGGLPDSTGALSPGPGPPRSPSQAFEDASKVAASVA*REEWHPPEGQGWAFGASAA*GGGSEQEHSAIAGSGREAHPWPSTQTWMNRGLDGPGRR*AGPRITARGTIDSWAAGLPSTREKPRRDNRRRPFGNAVAVEVLCI*YEKAALNLSPDPF*TSG*IWTSNCRDCRRRVKER*EMT*IPSRHKKKIVDTSSASDFEMELFRPPLERPRSDTRPCLFSTLEDPAGGRRGPEPDWSCEEDVSLFFILLYCVCILVLISYPPHHVCVCACVCVFECV*KCQVLGVMSF*LL*SACHIL*VVNML*IPFC*DSFELLFGEEK…	16.3316	7.03854e+06	1065	222	74.6667
EMBOSS_077_1	1	EMBOSS_077	ENSMUSG00000085412	ENSMUST00000155758	Medium	[R].QKNQNMPLTPNAKSL.[A]	QKNQNMPLTPNAKSL	GGGAGACCGTGGGCGGAGGTGATACAACCTGACTGATGATGGCTGACAAAAGAAGAAGAAAGTAGCTGAGAACCAGCAGCTGAAGAAAGCAAGAAAATATGAGTGAAGTCACAAATGTCACCAAGGAAAGGAAGAACAGAAAAATAACTTGAATATTCAAGATGGGCAGCCTAGTTCAACGACACATCAAGCCTTGTGAAAAGGTGACTCCGAGATTCAGATGCTGCCCAAGCCAACCCGAGTTTACCAGGTTCCAGGAATGACCTTGAATTCCAGATCCTTCTGCCCCCATCATCTGAGTGCTGGGTTACGGTTGGGTGGCTATACCTGCCTCTCACCTGGGTCTTTGAAACAAAAGAGGGAAGAAAGAAAGAAGGAAAGAAAGAAAGAA>ENSMUSG…	EESS*EPAAEESKKI*VKSQMSPRKGRTEK*LEYSRWAA*FNDTSSLVKR*LRDMEAHACSLTTQAGGGEFYTNLGYTVTHCPKTETKSKKFLSEPQKRFLR*QKNQNMP*LTPNAKSLAMFSKHLHKMLFSRKRA	1.86781	1.15162e+07	error	36	12
EMBOSS_102_2	2	EMBOSS_102	ENSMUSG00000091412	ENSMUST00000171591	Medium	[K].KIMHFFLHTLTPVTQLTPTSVQ.[M]	KIMHFFLHTLTPVTQLTPTSVQ	AATCGAAACCCGCTCCAGTGATGCCAGCTATCCCTCCGGCGCCGGTTCCACCGAAGACCACCAGTTGTGGTCTTCGCAAGGGCCACAAAAGACGGGCGGGGTGTCCAGTAGCACCCCGAAAGCAAGCTTTGCTGGGGGTCCTTGTCTTGCTCCGGAGGAAGAAGGCGTCCGGAGGGCTTACCTAATGAGCAAGCAAGCACGGAAAGGAGCCAACCACAAGGTTGGAGGTGCAGCGCCCCGCGGGAGGTGAAGAGGGAGACGAAGATGGGTGAGCAATCTGCCTGCAACGCGAGAGGGTAGCCTGGCAAGGTTTGTTTATGTCCGTGCGTGCGTAGGGCGATTTTATAGGCGCCGGGGCCCCGCCCCCAGGGCCTCGCCCCTCCCAGACCCTCTGCTCCC…	IETRSSDASYPSGAGSTEDHQLWSSQGPQKTGGVSSSTPKASFAGGPCLAPEEEGVRRAYLMSKQARKGANHKVGGAAPRGR*RGRRRWVSNLPATREGSLARFVYVRACVGRFYRRRGPAPRASPLPDPLLPAQQETGTHPFLRPASCCTLPGLGGAGWSRRLLRKPLQGRDWRDCPALPAAPPCDPLSGPRRVQRTCAHRVVAWCARARSCACA*GLPCVSLRDRLPPYSL*VS*ASARATPFWAAPPTSSGSPRSHSRAPFTA*TADFISRLLSHCLAPFILADLGAPQLPSYSELLFPRCSSPLCQL*ALYGLQFVVPRTCIEFAFQSWIFLLS*CSKTLACLPVTGFSP*PTPEPLQGAFLKQVDTLVTPQSSLVRI*ECAPTLGL*KKTPQRV…	1.52402	2.88721e+06	error	21	7.33333
EMBOSS_100_1	1	EMBOSS_100	ENSMUSG00000096919	ENSMUST00000180684	Medium	[S].LRINQQR.[K]	LRINQQR	GGTCCAGTTACAAATTTCTTTGTAGCTAAAATCAATCGGTATGGAGGCAATTAAGGAAAGATTAGCAAACAAACTGAAGCTGCTTTTCGTCCATTCCCCACATTCCAAGCCAAGAGAAAAGGATAATAGCCTAAAAAGCAAATGGGAGCTGAAGCTGGTTTCTCCAACCTATCTGAAAAGTCTTTATGCAATCAGAGGGCTATTATTTCAGGAGACAGAGTGAAGGGGGCAAAAGATTCACGTTGCTAAGGAGATCTGCTGAAGCTGGCATTCCTACATAAATTTCCATTTCTATTGAAGGGAGAAAGAAAAGATATTTTTTCCAAAGTTTATTTGGAGCCCCTGGTTACCAAAGAAAGGCATTTTGTGGGTTTATTTTATCTTCAGTTGTAAACAACT…	GPVTNFFVAKINRYGGN*GKISKQTEAAFRPFPTFQAKRKG**PKKQMGAEAGFSNLSEKSLCNQRAIISGDRVKGAKDSRC*GDLLKLAFLHKFPFLLKGERKDIFSKVYLEPLVTKERHFVGLFYLQL*TTNPERIKKPEC*PPAANQSPSLRINQQRKPSIGILR*QQRKSLCKHKIKFLEEI*LSELISPITKNVRQRKVGFVCVCVLARASIKKKKKKKKHPAEPPFYIP*SVHTAAAEETEFK*Q*FSARNWKLANS*EWDSGNGVKNKTKQKQKLEDQEENKATKSL*ASSHNGYRLLYPVSHPHTIFTAC*MKQNFPGNCE*LAQRKRSGRKGSFLLWE*KKGNSEATMVSPKKERKFISLS*LSVSLPKI*RGNTHTHTHTHTHTHTHTH…	6.6073	3.76419e+07	154	41	13.6667
EMBOSS_021_3	3	EMBOSS_021	ENSMUSG00000087357	ENSMUST00000138374	Medium	[R].LQSPQFPAAFQGPFSFKGTMISDSGDPALR.[T]	LQSPQFPAAFQGPFSFKGTMISDSGDPALR	CCTTTTGGCCTCAGTTACTCCCCGGCTTTGTAGAAAGCTCCCCAGATGCTTTATTCATTCTTCCGACATCTACTGGGTAAAGCTCTCGACCTATGGGGAGCAGTTTCAGTGCCTTGCCTTCTCAGCCTATCCATTGTGGAATATAATCAGAACCAGAACCCAGAGTATCTGGAGACTCTCTCTGGGTCATGAAAGATGTTACAGATTCTGGGGAGTGGCCAGTGCTTCCCAGGCACAAGGTGGAAGGAAGGGAGATGCTCCTGCTGCCATGATGGACTGGAAATCTCTCTGACTTCCCAGGCTGTGGTTGGGGCTGGGTCTGAGTCTTCTGTCCCAGGCTGGACTTAAAGTTGCTGTGAGGCTGAAGATGACCTTGATGGTTCTTCTGTTCCAGCCCCA…	FWPQLLPGFVESSPDALFILPTSTG*SSRPMGSSFSALPSQPIHCGI*SEPEPRVSGDSLWVMKDVTDSGEWPVLPRHKVEGREMLLLP*WTGNLSDFPGCGWGWV*VFCPRLDLKLL*G*R*P*WFFCSSPSLLSVKVTDLSAKMVAAGLRTWHSLPRLVAGAAVPAG*L*CCGSSATLPALPWLSDPPLHSNCSRRSY*LLLQILQTGVPLGT*AHTLS*GCIFGFHRLFVEAQLSCLSIL*VSCPRRPPDPS*LCHRLLLSVLLPILLTVRNFEGLLLPSLWWLTSCAAVTRRPAPSSPPPRVLKFLKPLFIEFCGFAWTMLNVTHWPGRNYGIHLRCHSIGYKPNFLQHI*IFFLYSVLLRH*GWLHCELVTVHRDTQRISDQRWD*ILQDSTGC…	10.205	2.06358e+07	409	46	16
EMBOSS_062_3	3	EMBOSS_062	ENSMUSG00000038311	ENSMUST00000090537	Medium	[R].SLGFWSTTMTCSGCWSGLLMT.[A]	SLGFWSTTMTCSGCWSGLLMT	GGGTCCCAGGGGGTCCGGCAAGCTCTGGGAGTTCCTTGGACTGATCCATCCCCAAGGAATGGAGGAATGCACTCTGCAGCTCCTGGAGCAGCTCCAGGTGGAGGTGCAGAATTTTGTCCTCTGAGTGGCTGCAGAGTTCTCCTCCAGGAAGGAGAAGCTTGGGTTTCTGGTCAACAACTATGACATGATGCTCGGGGTGCTGATGGAGCGGGCTGCTGATGACAGCAAAGGGGAGGAGAGTTTCCAGCAGCTGCTCAATGCTTGGACACAGGACTGAGCCCCAACTCAAGGGCAGAGGGAGGAGCTGCCTGTGGCCCCTGAACCGGTGTGCAGCAGCATTTCCTTCCTGCGCTCCAGCTATCTTTGGAGCCACTCCACGCAGGTGCTCTCCAGGTCATC…	VPGGPASSGSSLD*SIPKEWRNALCSSWSSSRWRCRILSSEWLQSSPPGRRSLGFWSTTMT*CSGC*WSGLLMTAKGRRVSSSCSMLGHRTEPQLKGRGRSCLWPLNRCAAAFPSCAPAIFGATPRRCSPGHRSGLCNRDHCRLYCQYPWRRLPSDPTSQSYNHWNISQYTGPWSFIHGARGSYLRFSTSLSKRTNCV*STSPASMYRGFPWPGRDMAVEKYRIECEPEGGAQ*NPDLLPGPRACERVWKGAGRRSCDVAGEGAEGRVGGAGTGLPLCSPRPAHAPRSLFPPDPAPTRARLGPGQGGRLQQKQLSLHLPPSGNQEGSEF*DLPGLHNQSPWPRWLVSQDLAI*WG*DLRAGHSLVSWRRT*PRLGAEVKLGRWGIQGPGIAHP*PRLD*…	1.06801	5.69005e+06	error	59	20.3333
EMBOSS_267_2	2	EMBOSS_267	ENSMUSG00000113346	ENSMUST00000223470	Medium	[K].DQHQKPDGKRQ.[A]	DQHQKPDGKRQ	GATCACAGATTACCTTCAGTGGTTGGGGAGGAGTAGTTGGATTTTCAACAGCAGGGATCGACTGGAATCCCCATGTAATAGGTGTGGTATGTGTACTCTATTTCTTCCCTCATGGTGTCTAGGCACTGCTACACACCAGGCTGGAAGGAAGCAGAGGCCAGAAGAGAATCCTTCTGGTCGCCATCTGAGCCTGGAGCTAAGGCTGTTCCACAGCCCTCTCTACACAGGTTCCGCCAGAGAGAGCTGGTCTCCCAGGAGTGCTGACAGGGCTTGCAGGCCCACAGGAGGGACAAGCTCCAGCCAGAGACAGAAAGACCAACACCAGAAATAACCAGATGGCAAAAGGCAAGCGCAAGAACCTTACCAACAGAAACCAAGGCTACTTGGCATCAGACCCCA…	ITDYLQWLGRSSWIFNSRDRLESPCNRCGMCTLFLPSWCLGTATHQAGRKQRPEENPSGRHLSLELRLFHSPLYTGSARESWSPRSADRACRPTGGTSSSQRQKDQHQK*PDGKRQAQEPYQQKPRLLGIRPQFSHHSKSWIPQHTGKARYGFKNHISLC**RILRRT*ITPLKKYRRTQVNK*KL*RGNKNPLKNFRKTQLNR*RN*TKPSRI*KWK*KQKEITKGDISPDFNGTALLDNLSLICTG*SLLSGLLGFSSPEDGQPTRRYKTI*KMPD*KIGLSCRFL*AVLLMS*QCRLDLLQRTISKQVLLCPINLSFPLPLVWWARRDIKTFKNNNPRTVRLSASDKRDYLLKWPIFV*NGHSN*KEK*GSGERLSS*EH*LIFQRTRDQFLAATW…	5.47081	1.97815e+07	error	73	24.6667
EMBOSS_232_3	3	EMBOSS_232	ENSMUSG00000097206	ENSMUST00000180825	Medium	[R].QGLALTQASL.[E]	QGLALTQASL	GCTTGAGGCAGGGTCTTGCCTTAACTCAGGCTAGCCTGGAACTATGTAACCTAGGGTAGCCTTGAACTCACTGAAATTCTCCTGCCTTAGCGTTCTACAAAGGCAAAATTGATGCTTCTTCTGAATCAATACAGCACTGAAAATCAAATCACTTCAACCAAATACTATTGTTTACTCATAAATATGTGTTTATTTTTAAGTTCAATAGGTCTGAAGGATTAAAAAATATTCAGGGACAGACACAGGAATATAAATTTAAGTAAAAAAATAATTAAACTTTAAGAATCCAGCTTCATTCTGGGACTACAAAGAGAAATTTACAGATATACTACATATTTAACAGTTCAGTTTTGTAATACTAGAGGGGGGCTGCTATCAGAAAATTGTCAGCCGGGCATG…	LRQGLALTQASLELCNLG*P*TH*NSPALAFYKGKIDASSESIQH*KSNHFNQILLFTHKYVFIFKFNRSEGLKNIQGQTQEYKFK*KNN*TLRIQLHSGTTKRNLQIYYIFNSSVL*Y*RGAAIRKLSAGHAFNPSTWEAEARGFLSSRPAWSTE*VPGQPGLHREKKKKSKLSGHSYLDPTNLPVKYIRKSYLCRSYQ*WHQFIFKDYIR*AFKISKMLLQILNC*VPV*SPF*ISSLMMEKEES*DMLQL*TFLPKHERLGYSSGVFNYLTFKGLLTTHK*ILFSFHFFPPLYTINLLSTCIYL*EKFPVGFY*DLTLH*KLY*VLLKKI*NRFYLLPYFPQRTQENSTGFTIKLNLCTSFLVSQTCPKKKKKKKKKHLNR*KTCLNEFLQVRIWT…	12.1409	1.10121e+07	3	44	15.3333
EMBOSS_176_1	1	EMBOSS_176	ENSMUSG00000101966	ENSMUST00000186108	Medium	[K].IALENGWQKTVE.[K]	IALENGWQKTVE	GCGAATAACAATTTTTATTTGTCCTGTTATTTCTCCAGTTAGGGAAGTAAGTAGAAAGTAACATTTAGTTGAAATCAAATATCAATATAGTATCATTTCTTTGCCACACATTATCTTCTAATATAGTACATATTATTAGTGCCATAGATAATCAAGAGGGTAGGCTTCTGCAAAATGTTAATTGTATTACAGAAAGAGAAAGAAAAATGGGACTCAAGTGGGTATCTTTTTATAATATTGCCCAATGATTTCTCATTTGGGAAAATATGAGCATTGTGATAAGAAAATGGATGGCAAAAAACCTAAGTTGAAAAGTAGACAGGCATGGTGTTGGAGCAGTAGCTGAGAGCTTTACCCCTACGGTTCCCTGGCTAAGGCTATGCCACAGTACAACTAGTA…	ANNNFYLSCYFSS*GSK*KVTFS*NQISI*YHFFATHYLLI*YILLVP*IIKRVGFCKMLIVLQKEKEKWDSSGYLFIILPNDFSFGKI*AL**ENGWQKT*VEK*TGMVLEQ*LRALPLRFPG*GYATVQLVTFRKILNNRFLPSIFLSHVFYYPSPRIQRIFIPSHGVVVAVVAAAAAAAAGSDAAAVVIVYSCFFFSL*NSKIHIEFIQHHHAGRTYLS*VFFTMLCSRKYLS*Q*IILS**PPTQSALSWSYIQITLVIPQDLSRPL*CQIHPSFNLHKIS*RRYYFTSIV*KLSAFDFKRSGGEGRYLGTLVWIRTGLWSLSLAPKTGFLSPM*SILSMPFYYG**ISFLSSTSFLLKVSPNMSRMLGRLPYVNIFKI*ELLQLENIALYVFKQ…	3.29105	1.81638e+06	error	175	58.3333
EMBOSS_043_2	2	EMBOSS_043	ENSMUSG00000087679	ENSMUST00000133808	Medium	[G].SHQVQQLR.[C]	SHQVQQLR	GCGCGCACGCTAGTGCGCGTCCTCGGATAATGAGGAATTCCTGGATGCTCCGCGCGGGCCCGCGGTGGGCGCTGCGAGGCTTCACCGTGTCGTCGCGGGCGGAGGGGGCGTGAAGACCGTGCTACGGTGGCCGCCGAGGGACAACACTACGGCTCCCACGCTGGGACAAACGCCTCGGGCCCGGCCCGGGAGCGCCCTCCCCTCCGGGCCAGAGCCAGCCGGGGGCAACTGAAGGGCCGCGCGAAGCGACCCCGTCCTCGGCGGCATGTGCCCGCCTTGGCGTCGCACCCCCGGGGCACAAGCTCAGCCGCAGGCCCGGTCCCCAGCACCGTCGGCCCGCCGCATGGTTCCGGACACCGGCACCGCCACGGAGAGGGCACCGGGCCAGCACCTCCCCCA…	RAR*CASSDNEEFLDAPRGPAVGAARLHRVVAGGGGVKTVLRWPPRDNTTAPTLGQTPRARPGSALPSGPEPAGGN*RAARSDPVLGGMCPPWRRTPGAQAQPQARSPAPSARRMVPDTGTATERAPGQHLPQGSAEGS*TLMTPMLAIRTLHRHCKTALPPRPNAGHAHPAAGALLPRPAHHLPARSLRTAENLSPGSHQVQQLRCLCQDPLALWLYTLPALLQLQPLHSGPLGRAGRALLPTVPGCPRTAALPAQAVSAAAAAGAQARGLPPHERAAYLWHPCDHAAGWGAGLVLHGLCGHVRAHPPWGS*LCHT*LLSWRVGLVGAFFFFFFFFFLPHPGGKA*STHSH*GEKRAETTL*WEQHTVSLLASALSLLCTLPDVLSPLASCLGLPVCF…	6.52645	1.18148e+06	199	30	10.3333
EMBOSS_173_3	3	EMBOSS_173	ENSMUSG00000097479	ENSMUST00000181481	Medium	[R].EQNTGRTAFTGHSLK.[E]	EQNTGRTAFTGHSLK	TCCTTTCGGTTCCGGGCGGTGGACCGGAAGAGCCTAGTAGTTTATTTAGCCGAAATTGGTGGGATGAGATCTGTTGACAGACCTGACAGGAAAAAGGACCCTGGGACGCCAGCCTGGTAGGGAAAGATTTGGGGTGGAGCCCAGAGAGGACCAGAAAGCAAGAAAGCCTCTACGCTATCCTGAAGAGTTTTTCAGAAAAAGGAGCTGGAGAGATGGTTCGGCATTTAAGTACACTGCCTGCTCATCCAGAGATCTGAGTTTGATTCCCAGAATCCACATGGCAGTTCACAGCAGCCTGGAGAGTGGAGAAGTCTTCCATGTTAACAAGCAGCTTTAAGTGGTCACACGCGTTTACTCCGCCCGCTTCTTGCTTGAAACACCAGAAATCTGATATATACT…	LSVPGGGPEEPSSLFSRNWWDEIC*QT*QEKGPWDASLVGKDLGWSPERTRKQESLYAILKSFSEKGAGEMVRHLSTLPAHPEI*V*FPESTWQFTAAWRVEKSSMLTSSFKWSHAFTPPASCLKHQKSDIY*LIQL*PDNPRHSCGSLGPAIKTDNNPAARNSAHRIV*RFM*K*KDVLPDLNSGAIWVLTSVQELCKMSDSSRPPPIRAAILPSENCSIRTQVHVPFGGI*LLLKCDKMSTTLFDFSKN*VIMVL*FTLELKEKSIRDSMDFSLQTHMTPSLPHRTQMLTEEQDK**ASILLI*KILQFLYINDFLQRFAAVWLCSAAIHRPHRTGSPARLE*CNRRHHHAYYITREQNTGRTAFTGHSLKERGEECVEQPSIHPCTQEGK*KTDKT…	21.2351	1.63038e+06	359	64	22
EMBOSS_381_1	1	EMBOSS_381	ENSMUSG00000113566	ENSMUST00000222324	Medium	[Y].GRETLMSSVKSLFK.[S]	GRETLMSSVKSLFK	GGAGTAGCCTTGAATGGTTGGTGTGACTTGCTTTGACCTTTGCTGCTGGGTGCCTTGGCGGAGTGCTGGCGAGCTATTGAGTCTCATCATGAATGCAGTGACTTATGAGGACGTGCATGTGAACTTCACTCAAGAGGAGTGGGCTCTGCTGGATCCTTCTCAGAAGAAGCTCTACAAAGATGTCATGCTGGAGACCTACAGGAACCTCAATGCTATAGGATTTAATTGGGACGACAAAAATATTCAAGAACATTGTCCAAGTTCTAGAAGACACAGAAGTCATGCTCAAAGGCATGAAAGGATTCATACAGAAATGAACCCCCTTGGAATTATTCAATTTGTTGAAGCCTTTGCTCAACATCGTCTCCAACTTCGTAAAAGAGCACAAACTGGAAAGAA…	VTCFDLCCWVPWRSAGELLSLIMNAVTYEDVHVNFTQEEWALLDPSQKKLYKDVMLETYRNLNAIGFNWDDKNIQEHCPSSRRHRRHERSPSAEKASEYTQCDKVFFLCSQSCSKA*KDSYRNEPPWNYSIC*SLCSTSSPTS*KSTNWKETL*MEAMW*SL*RSQSS*KL*RNSYGRETL*MSSV*KSLFKSQ*SPTT*RNTYWREML*M*SVW*SLFTT*SA*KAWKNSYWRETLQM**L*ESLFTTYSPPVT*KNSYWRETLQM**M*ESLFTTL*PPKT*KNTYWKETQ*MX	1.71138	4.32894e+06	error	14	4.66667
EMBOSS_205_3	3	EMBOSS_205	ENSMUSG00000097664	ENSMUST00000180844	Medium	[G].LLSNHVSNTPK.[S]	LLSNHVSNTPK	GGGATTTCCTTGGTTGGTTTCCATAGCTTGATAGACCAAAAACAAAAACACGGCCACAAGGGCAAACAGCAACATTTTTATCCACATGGGAACGGAGCGTCTCTTCTTTGTCTTTTCTGACTTGACATCTGCCAAGGGAGCATACTTCGGGACGTACTTAGATGAGAACGACTCTTCCATCCTGAAGTCACTGAGCTCGAGCGGCCGGCCTGCAGCACCTTTGATTGGTCTGCGGCAGCTAGCACTGTTCAAAGTGAAACAGAATTCCAGATGATTCAAGTCAACAACCAAACCTTAGTGTGATTTCTAAGCACACTGCAAAATGCAGCAGCAGAAAATCGTCAGATAAAAGCAGGGGATTGACGTATCACATGCTTTTCTTTGTTTGTTTTGTTTTTT…	DFLGWFP*LDRPKTKTRPQGQTATFLSTWERSVSSLSFLT*HLPREHTSGRT*MRTTLPS*SH*ARAAGLQHL*LVCGS*HCSK*NRIPDDSSQQPNLSVISKHTAKCSSRKSSDKSRGLTYHMLFFVCFVF*DRVSVYPWLSWNSLCRPGLL*SNHVSNTPKS*LYHIIK*YLG*ILSKPVLEAE*CTVCL*SQHLGSVS*V*HLPCI*GKSKISLVT*ELVSKKKIKL	8.76851	3.7577e+06	error	86	29.3333
EMBOSS_062_2	2	EMBOSS_062	ENSMUSG00000038311	ENSMUST00000090537	Medium	[R].ILQNVCNR.[F]	ILQNVCNR	GGGTCCCAGGGGGTCCGGCAAGCTCTGGGAGTTCCTTGGACTGATCCATCCCCAAGGAATGGAGGAATGCACTCTGCAGCTCCTGGAGCAGCTCCAGGTGGAGGTGCAGAATTTTGTCCTCTGAGTGGCTGCAGAGTTCTCCTCCAGGAAGGAGAAGCTTGGGTTTCTGGTCAACAACTATGACATGATGCTCGGGGTGCTGATGGAGCGGGCTGCTGATGACAGCAAAGGGGAGGAGAGTTTCCAGCAGCTGCTCAATGCTTGGACACAGGACTGAGCCCCAACTCAAGGGCAGAGGGAGGAGCTGCCTGTGGCCCCTGAACCGGTGTGCAGCAGCATTTCCTTCCTGCGCTCCAGCTATCTTTGGAGCCACTCCACGCAGGTGCTCTCCAGGTCATC…	GPRGSGKLWEFLGLIHPQGMEECTLQLLEQLQVEVQNFVL*VAAEFSSRKEKLGFLVNNYDMMLGVLMERAADDSKGEESFQQLLNAWTQD*APTQGQREELPVAPEPVCSSISFLRSSYLWSHSTQVLSRSSFRAM*SRPL*AVLPVPVEEAPVGPYVTVIQPLEHLPVHRALELHPWRTRLISQILHVAVEAHELRVVHVAGFHVQGLPVARPGHGSGEIPHRV*A*GRRAVKP*PPPRTPGL*AGLEGSRAPVLRRGWRRGGGSGGRRGDRASPVQSPTRPCPQKPFPSRPRTHPCASGSRPGRSPAAEAAFAALAPFWQSGRV*VLRSARTSQPEPLAKVAGFPRSCYLMGVRSESRSFISVLEKDLTQVRSRSEIGEMGNPGPWDCPPLT*AGL…	1.06801	1.33995e+07	586	59	20
EMBOSS_316_2	2	EMBOSS_316	ENSMUSG00000105402	ENSMUST00000198582	Medium	[C].SLNLREVPPAISQPLVVCWYSESAGLQPLR.[S]	SLNLREVPPAISQPLVVCWYSESAGLQPLR	TGCATGCCTTCCCTGCCCTCTGAGCTCACCACACTGAGAAATGAGTACGGGGGGGGGGGGGGGGGGGGTGGTGCCTTCTCCTGTCACGTTCCCACTCCTGCCCATCTCCATCAGTACATTTAGAGAAGCATCGTCCTTACTCCTGTAACGCTGGCTTGAATTCTTGTATAATTCTGCCATCAGTAAAGGTCCAGTGATTGTTTTCATTCTCGATAGCCTCCAAATGAAGATTGTAGCCTCATAACCCTCGCTAACCTGAGTGATTCTGAAACTACACAAGCTGCATTTGGGAGAAGGAGAAGTGTCTGGGAAGGGGCCCCGAAGAGAGGAAGAAGAACAGACGGAGACCAGGGGGAACTGGGAAGGAGCAAGTGCGGAGGCGATCCTGAAGCTGCTGAG…	ACLPCPLSSPH*EMSTGGGGGGVVPSPVTFPLLPISISTFREASSLLL*RWLEFLYNSAISKGPVIVFILDSLQMKIVAS*PSLT*VILKLHKLHLGEGEVSGKGPRREEEEQTETRGNWEGASAEAILKLLRKEDG*ARLKLFCCRNARKI*EDPERILWQRAHLVFGRHLFVVVVVTTYIPPPCSHMKTIISQFRKSVLIVSLASKDPAPFTRSD*LQRQLGRNSGLGVS*AFLVGNCLELVLESWK*GRCPI*GGREEFIPECWRDGLRETTSLGLTCTRYSTSSTGETRAPHRGQGPDFLPQMCDPRQIHQNLGISIYSGVCRVSTSPSAKHKYLLFSLLALHHDNCKLIFIFRQQ*N*TQYEHFALMDITESLHICARGRG*YNGEPYTPGSFR…	0.724219	460350	error	4	1.66667
EMBOSS_086_3	3	EMBOSS_086	ENSMUSG00000097380	ENSMUST00000180679	Medium	[K].DACLQGKDQNTL.[N]	DACLQGKDQNTL	TTAACTGCTGAGCCATCTCTCCACCCCCTAGTTTAATTATTTTTAAAGACTTATTTAATTACTTATTTATGTATATGTATGTGTGTTTATGTGCATGCAAATGAATGACTTCAGAGGCCAGAAGAGAGCATGCCCCGGAGCTGGAGTAACAAGTGGTTGTGAGCTGCCCAACAAGCCTTAGCAACTAAACCCTGGACCTGCAAGCACTCTTACCCACTGACCTAGCTCTCTAGCCCCTTAATCATTACTACTTTGTCCCTTGGGACACTAGGATGAACCCAGGGCCTTGTACATAATAGATGATTCTCCTGTCTCAGCCTCCCAAGTCCTGGAATTACAGACCACTATACCCAACACCACTGGACATTTTGTTTGATAATTTATATTATTTTAATTTCA…	NC*AISPPPSLIIFKDLFNYLFMYMYVCLCACK*MTSEARREHAPELE*QVVVSCPTSLSN*TLDLQALLPTDLAL*PLNHYYFVPWDTRMNPGPCT**MILLSQPPKSWNYRPLYPTPLDILFDNLYYFNFICLCF*KVSCYILNHFVLNSQKSICLCLQSTRINSGICLSLPPVLASKACATTLANMWVISEFFFHN*KIIITEENSEYF*KKLLLLMCMGVLPAVNVLYERPGLMEARGGNFSRTGVTGGCEQSHRHWKQNSNPEQNC*PTSPVVNNSVQIM*FLFISFSKMTQKSKDACLQGKDQNTLNIKHSILYISTV*LLNKSICNGTNFKMFIIIVCANVWAIHAVCPRGGQGTTVRETALSLYHRFQGLNSGPKAWRAAFSWSQPSCQSK…	1.56159	3.52565e+06	301	69	23.6667
EMBOSS_075_3	3	EMBOSS_075	ENSMUSG00000097393	ENSMUST00000180524	Medium	[S].DISINLK.[V]	DISINLK	AGAGCGTCCGGGACAAGCGCTCTGTTTTGAATCTTTGGCATCTTCAGGGATGGATGGAATCCTACAACTGAGGGAGACTGCGGTCTTGGGCGTGAGCAAGTGAGGAAAAGCGTGCTGGAGCGACCAGCAGCAAACCTCCTCAGAGAGGGTTCCCGCGCGCGCTCCACACCTTTCCCAGTTGTGGTTTACACCCCACTGACTTCTCTCATCACATCCGTGTCTCCATCACCATCAGATACTTTTCTCAGTGCGTCTGAAAATGATGGGAAAGGCTCTCAAGCAGCCTAACGAGCACACTACCACCAGCACCCTTCACAAACTGAGCCCAGAACTTTCTTGAAGAAAGGATGCTGCTGGTCTCCCAGACCTTCCTGCTCAAAACCATAAGTTGGAAACACT…	SVRDKRSVLNLWHLQGWMESYN*GRLRSWA*ASEEKRAGATSSKPPQRGFPRALHTFPSCGLHPTDFSHHIRVSITIRYFSQCV*K*WERLSSSLTSTLPPAPFTN*AQNFLEERMLLVSQTFLLKTISWKHSATCCKILCFGHLHQILSSSSSTLNLGSNQQSLNWI*DMLTKRESMLCTRKLTNCPELVKSSVLTKNLQVTILLNQHNQTSD*STYGSAGTPRCPETFPSVFGAATWNHPESAFYMRPVCLTCTWDEVSICQI*DSLNHVLRGQSSRVGHKEWL*PSLVWSLSSFQRCMPSGRNGAQQGPPSLLSDISI*NLKVPPLPGHHQSHHHSSCSRWGQRQTTTA*PCAETPAPGSAPGANRTPSGFTATQKPCPGPRPLLGTEWCHGGDNG…	0.724679	937055	error	50	17.3333
EMBOSS_022_1	1	EMBOSS_022	ENSMUSG00000090399	ENSMUST00000112103	Medium	[P].QEPGTRESILK.[R]	QEPGTRESILK	AGTGAGAGGCTGAAGGCCGGAGCGCGCAGCGCCGGCTGAGACTCGCGCGGGGAGCCGGCTGGGCCCCGGGAAACCCGGGAAACTTTCTGATCGCGAGGACAGGACGCCCTGCGTTGCGCTGCTCGGGCGATGCGCGATTCTGCGCGGCGGCGGCGCGGACCCACAACCCGGGACCTGAAGCGCTCCGGATCCTAGTGCCGCCCTACCTCTGCTGCTGACCATGAGTGGGATGGCCAACGTGAATTCTGCCAGCCGCCCACACTATGCTTCCTCTATCCCCGTGCCTCGAGCCTCCTCCCAGACCAGGATTCACACCCCAGGCGCATCTCCCCAGCTGCGGCCTCGCCAACAGGCTGACCTGGCCCTGAGTCCCCAGCGAGGAGCCTCCCCAAGACGGGG…	SERLKAGARSAG*DSRGEPAGPRETRETF*SRGQDALRCAARAMRDSARRRRGPTTRDLKRSGS*CRPTSAADHEWDGQREFCQPPTLCFLYPRASSLLPDQDSHPRRISPAAASPTG*PGPESPARSLPKTGQGCSLF*KLIPQGLQGKRNPQGCRASQRTGWECRKPSQLPLEQPQGNPQNSPLQSGRIQKSWGDTKHPEEEDPGRNSSSTHQRKEPTPVKLLWRNTNSRAS*RSDASWLPGKRSKKHHLQTP*VSGAG*RGSFGDFLSSVQPRAEHAVLSYSWSH*LFLSPSAESTNHSHSSPLPVQVSRGAGREGKGELCRDQGPN*RSEALVNNEWRTQGQKLGKGMAGDMGVW*TEIGL*SKACFFSPLGP*QEPGTRESILKRPFHTLLEMM…	0.862102	4.515e+06	379	130	43.3333
EMBOSS_335_1	1	EMBOSS_335	ENSMUSG00000113204	ENSMUST00000223059	Medium	[VI].KEQILER.[N]	KEQILER	AGGCGGATGAACAGCCAGAGCTGCAATGGTGGATCCTCCTCCAGGGCTGCATGGGACGACAGATAGATGAGGCTCTAGGACGGGCACAAATGCTACCCGAATGCAAACCACTCCGGAGATCTGTAAAAGGACTGGCCCCGGACAGGAAGCACACTTTAAACTAGAGGCGGGGTAAGACTCGTGGGCCAATCAAGGCTTCCGAACAGAACTGCCATTCTGGCAATGAGGCGGGGTCTTCCGGTTGCCTGCTGGAAGTTTGTTTTTGCTCTGCAGGATTGAAGGGTTCTCCCTATGCTGCTTTGAGCGCTGCTATTGGGTGCCTTGAGGGGACCTCAAGTAAGCTCCATTTTTGAAACATGAGTCAAAGCCCCGGTGAAGATTCTGTGACGGTTCATTGTA…	FFFFFFFTLIMNHLLAFLL*NLEAVHSPLFPKTNSFSSRGPLATCLIPG*NTWQLSALQIKFFIPSLLSNTKHRTFIHTDWTRTYMN*TREQIGAPDIRQDTKGNRVLLL*GPERNFSLLLGTLSSLMMHFLLTGAIRLFLLINPFFSHTSCSFGELRPTAYYPAPHC*T*VNQRSGLTLSQLSPYLLRYEFPLSFILWSSEPAASLPKILCRFSVPRWFANCCVRPADHNLGSSLERHFGNLEEKRG*VAREKNVAKTVTLIKAPKIA*FSILYHSFSGTLF*ATIGKTIILKNIVKVLEDMKGMKEFILERNRMNVTNGVKPLQVTIISKYVKEQILERNLMNVINVVKPFHNRVVSSIIKEHMLDRNLMNVISVVKPCHVKEISNIIKEHILERNP…	7.1318	5.54159e+06	335	7	2.33333
EMBOSS_228_2	2	EMBOSS_228	ENSMUSG00000097908	ENSMUST00000181190	Medium	[G].LNLTLPR.[L]	LNLTLPR	GTCTTGCTCTGCCTCCTCCCACACCAGAAGTGAGCATCAGGTGGTGGCGAGCGCGTAGACAGGGTGAAAGGTGTGAGGGTTAGCGACAGATCTGCGTATTCACCTTGCTGGTCACCGGCCACCACCACCTCGGCGCCAATGAATTTTCTGTCGCGAGCCCCGCTAACGGCTTGCCGCTGAAAACTCTGGGAAATGTAGTTAGGCGCGAGCAAGCTGTCGTTAGTTGCAGGTCTGAGGCGGGAACCGGGGCTCCTCATGTGTTCGCGGCTCGGTTCAGCCTTCCACGAGCTCCTGAAGTTCTGCCATTCCCCGTGGTCTGCAGTTCAGGAAGCTTCTGGAACATGCGGCGCCTCTGCCATGGAAACACGATCCGCGTCGTCAGCTTCAGATGTGATCTTG…	CVRGSVQPSTSSSCLSFPQSWDYRL*GNHD*K*INSQAGCTCVRFQCSQGRDGEVKTNLRLA*ST*QDADQAGLHSETLSPSITKKKKKSGRVKGPAM*RCLPPSRTA*RQSQSPAPTHGTKQELLKFCHSPWSAVQEASGTCGASAMETRSASSASDVILER*VRLGSCLKVNPVKGPEAAL*GSLAHPCRRTSQCVHSPSVGLRIQAGKKREEL*RT*EGPSLQSRQYLKVSFAFSTESSSAATLREGPCLVAVCHYGLCGIGDGLWPVAFEDELRFQIVFTQGGRRFLTATPSTLALTLATRPPSHISSEDP*RGWSPSPLPSA*RCY*LELC*DAGMTLGRGTW*LSKNGHGCADSPHPACRGG*LRTTLRVTLEVCRLSSRIA*SYTCRGNGNF…	6.57066	3.61415e+06	error	139	46.6667
EMBOSS_065_1	1	EMBOSS_065	ENSMUSG00000097636	ENSMUST00000180489	Medium	[P].CLEKQQQNTKQNK.[T]	CLEKQQQNTKQNK	GACTTTCTCATGCTCTCTTCCCACAAGCCAACAGTTCCAAAGCCGTGAGATTTCTGCTTCTGCCAACCTAGAGCTGAACGGTGCACCATCTCAGTGACAGCTTCCTTGCAGGCTGACCTACTTTGACCAATGACTTTCAGGATTGTCCTCCTCCAAGCCAACTGCCACATGTGAACGCTAGCCTGCTGGAAAGGGCACACGGAGAATAGTGGTGTCATGAGTGATAGCCCCAACCAGTGACCAGTTGAGTGATGGAAGCCACCTTCCACAGGCAAGCCAATGAACCAAAAATTTGATTCTGCTCCTAGAATTGCCAGGAACACGTCACCTCCTTAGCAGGTGCTCGGAACATATTTGGAAGATGAGTCCCCTCGTATCAGTGCACATTCCTCAGCAAAA…	DFLMLSSHKPTVPKP*DFCFCQPRAERCTISVTASLQADLL*PMTFRIVLLQANCHM*TLACWKGHTENSGVMSDSPNQ*PVE*WKPPSTGKPMNQKFDSAPRIARNTSPP*QVLGTYLEDESPRISAHSSAKSHRLQNFKKKKKAGKRCMCFREPPTVPSTAT*AVSFEPPHNRMGTA*SGHSAPCLCPSTQRVEEGRPEGTGSFSAIFAVCGQPGRPRLGLVKNCGYELQDCCKEQLTP*TLHGERCSERTVGERGTWYQSRNG*GSVCPQDMSFHGLWVRFSHSVIAQLMCVC*RAGSMH*EWLGWAGVVCCVSRGDGGDSLPFPARSASIRVQLVVNKSENAIWVRKRRGGGGGRGASEVTLSVLSAPNLPGNYTLDPQSSESLSPMAENPSSPN…	1.47363	1.63038e+06	1235	10	3.33333
EMBOSS_151_1	1	EMBOSS_151	ENSMUSG00000097811	ENSMUST00000180790	Medium	[R].RVAMWLQPR.[A]	RVAMWLQPR	CACAGAAACCATGTGACTCGTGTTTATTCTATAAAGATCAGGAGATACACAAATCCAGCAAACTCCCACCGACCAGCAGAGGACCACTTTCTTGGGATCTGCTTCCTGTGTCCGTCCACATGAGAACACACGCTTTGTCTCAGGTGAGAAGGGGCGAGCCCTGCCTGCCCAGTGTCTAGCCTCTGGCCAGCTGTGCAGCTCTGCCAAGCCTTAGACACATAACTTACGTCGGACCACATTTTGCACAGATTCTGAGGTAGTCCCAGTGATGTCTGCTTGGCTCCTCTCCTGCTCACTGCACGTTAGTGTCCTCGGTTGGTGTGACCCCCTGACCTGCTGTAACTGACCCGTACATGAAGCTGGCCTGTGGAATGCTCTCCCAAGTAGGACCCTGAAGGG…	HRNHVTRVYSIKIRRYTNPANSHRPAEDHFLGICFLCPST*EHTLCLR*EGASPACPVSSLWPAVQLCQALDT*LTSDHILHRF*GSPSDVCLAPLLLTAR*CPRLV*PPDLL*LTRT*SWPVECSPK*DPEGWAYVPQQRHTEKVLAMARPELLEATS*KS*YTQHKEGGNFLSCARHTGRRLHHR*V*ALLMRACPAPQAR*LQCLSSLLKWPLTKGT*VCVQANSLF*LIN*IN*RQGFSV*LWLS*NSICRPE*SGLHRETLSQTHTRD*DTEIDRGRQTAPCDISRA*WDIFPQRWKRFWSLTPQPRRHDG*RWAGSGP*PEWQEHTQKRRHPTIQGS*SLEIRLGRDLARPARGTGPGAESPSGLTAARCTRARSALTFPIFPGGFRLLATPP…	2.89779	5.43073e+06	451	11	3.66667
EMBOSS_150_2	2	EMBOSS_150	ENSMUSG00000096976	ENSMUST00000181611	Medium	[K].VSLCNLGCPE.[T]	VSLCNLGCPE	GCAAAGAAGGGTTTGGCATTTAAAAATGTAAGTAAAATATTAAATAAAGATTCAAACTGAAATAGTCATCTGTCAGTTATTTTAACTCTGTCATTTAGTAAGGACCAAAAACTCAATTATTAAAGGCTCAAAACAGGGAAAAAAGAGAAAAATCACTTTTCTTAAAAGTCTTATTACCAAATAATCTCAGCAAATGTGGCGCTCCGTACACCTGGGACATGGGCGCATCCGGGTGGTCGGCGAGGATTTCAGCGTACTGTGGTCTCTCAAACTTGTAGAGGAGCTGAGTGCCCAACATGACATTGAAGTACTCCTTTATGCCTGCCACCACCTCATTAACAGCATACTCTCTGAAAAAGAAAAAACATTACTTTCAAAATATTTCCCTTCTGAGGAGAG…	QRRVWHLKM*VKY*IKIQTEIVICQLF*LCHLVRTKNSIIKGSKQGKKRKITFLKSLITK*SQQMWRSVHLGHGRIRVVGEDFSVLWSLKLVEELSAQHDIEVLLYACHHLINSILSEKEKTLLSKYFPSEESKGKEVWLRLNN*NQFQSYIKVRRHLCFQAFFFFFFFFLVFRDKVSLCNLGCPETYSVDQPQRSYLSLLSAGIKGMHNSSSSSSSLKIVKLLTTVKHLQDTFSYT*NSTLCILKKGTFLLIICISSRLLIICIILQNGIHILLGRKIKKLEKKIEYQCL*KLHSFQNE*MSGFKITDTMQGDVTV*VNQITSTKFQL*L*NLKFHESLTTIILLIPTIPTASVICQFK*FV*SS*IWT*RTQLLSNIPVFLDCFETSFFRF*TCPFR…	25.344	3.46121e+06	177	26	9
EMBOSS_256_3	3	EMBOSS_256	ENSMUSG00000060149	ENSMUST00000190415	Medium	[K].ETILERNPM.[N]	ETILERNPM	ATAAAAGAACACATACTGGAGAGAAACCCTATGACTGTGACCAATGTGGCAAAGCCTTTGCACATCGTAAACATCTTCAAATGCATAAGGGAACAACACATAATGGAGAGAAACCCTATGCATGTAATCAATGTGGTAAGGCCTTTACATGTCCCAGCTATCTTCAAATCCATAAAAGAAACCATACTGGAGAGAAACCCTATGAATGTGACCAATGTGGCAAAGCCTATGCACGACACAGTTACCTTCAAACACATAAAAGAACACATACTGGAGAGAAACCCTATGAATGTAACCAATGTGGCAAAGCCTATGCACGACACAGTGGCCTTCAAACTCATAAAAGAACACATACTGGAGAGAAACCCTATGAATGTGACCAATGTGGCAAAGCCTTTG…	TCLS*EEGGSSGTLFSGSL*LSRLK*FLLCAAGYCEGNSGKF*KCDMMRILSLPTEAITGKITILRKIVKILEVTEGIFKEMNQLILERNPMNVFNMMELL*EINTIRYIKARILDPLCLMLIFEYIEEHTLEKKSMMITNVGKPLQVTAIFRSIKEHILERNPMNVTNVAKPLHVTDIFKHIKEHILERNPMNVTNVAKPLCVTPIFKYIKEYILERNPMNVMNVAKPLHNVFTFKDIKEHILERNPMTVTNVAKPLHIVNIFKCIREQHIMERNPMHVINVVRPLHVPAIFKSIKETILERNPMNVTNVAKPMHDTVTFKHIKEHILERNPMNVTNVAKPMHDTVAFKLIKEHILERNPMNVTNVAKPLHVTAIFKNIKEHTLERNPMNVANVAKPL…	8.29394	1.66183e+07	298	31	11
EMBOSS_069_1	1	EMBOSS_069	ENSMUSG00000090534	ENSMUST00000164755	Medium	[V].FMLLSQFSCLVVR.[A]	FMLLSQFSCLVVR	GAGCAGGGCGGCGGACAGAAACACAAACACTGCAGCGGCCCGTCTTCTGTGTCGGGGTCAGGGCGCGCTGATGGAACCCCCAATCCTGTAGTTCTGCTGAGGGCTGACGCTGTCCCCGGGCACCTGCCTGGAGAATCTTGCTGCCGGGCTTTGGCACAGGAGAGGAGAGGAAGGAGGCGGGCTGAGGTTTTGAGTTAGCCTGAGTCGCCGGGCCTCAGTGGAGACTGTCCGGGTTCTCCGACTCGCTGCTGCAGGCTGTCCCCGGGGCCATGCTTGCTCCGCTGGCTCCCAGCTTCCCCGGGCGCACTGAAGGTCTCGGGCTCCCGGAGCACTCCAGAAGCGGAGGGCTGCTCGGTGCGGCGCGGCCGGCCAGGCCCGGGCGCCTTCTCCCAGCTCCGG…	EQGGGQKHKHCSGPSSVSGSGRADGTPNPVVLLRADAVPGHLPGESCCRALAQERRGRRRAEVLS*PESPGLSGDCPGSPTRCCRLSPGPCLLRWLPASPGALKVSGSRSTPEAEGCSVRRGRPGPGAFSQLRSQQPDTCN*LLPSFRPGLSRAPLGERASERAPAWVPRPRAPGSRLLRAPQAGRMQGSRSWRRTGIKENVLYHLRSQVCSGAAPAFPAPGPGFRSAASEATAARLRFRRVECPPRAAESAHCLELGVAGGSPVLPSAAGALLAALPGG*KRYTRGKELQKLARKRVEPGGGSGGRVFESV*DCSEWQESTHFPWRARCDSQQTPPAVSCLMVALRGSGVESSPGWTEHFWQAFGKGMSLG*ARIPF*IHSFFKQLSSVLFCLLLILV…	0.817896	1.14627e+06	443	71	23.6667
EMBOSS_136_3	3	EMBOSS_136	ENSMUSG00000097767	ENSMUST00000182953	Medium	[L].LVFLGHTRTHNALGDRGGGGGGK.[W]	LVFLGHTRTHNALGDRGGGGGGK	TTTCACAAGTTTTGATCCAGCGGCACTATATTGGGGCTTAGAAGATGACAATTACATCATGGTCTCAAAGGTGTGGATGGCGCTGGTCTGGAGCATCACAGAACCAAGGTTTTTAGCGACTCTTTAGCATCCCTGTAAAGCTCGTGATGGTGCCAAGGAGTGCAGGCAGAGCAGATGCCAAAATTAGAGACCTCTGCCACAGACTTGGGTTCGAATCTTGCCGCCGCCCTGACCAGGACTCTTCCTAACAGAGTTCCTCGGCAACCACGCCCCGGCCCTGAGAGCCAAGCACGGATACCGGGTCCTCTTCTGGGATTCTAGGCAGTGCTTCTCGCTTAGGCGCCAGGTCCGCGATCGCGCCTCCGACCGTCGCGCGCCTCTCCACTGGCCAGCGTTGCT…	SQVLIQRHYIGA*KMTITSWSQRCGWRWSGASQNQGF*RLFSIPVKLVMVPRSAGRADAKIRDLCHRLGFESCRRPDQDSS*QSSSATTPRP*EPSTDTGSSSGILGSASRLGARSAIAPPTVARLSTGQRCYGSAAGGGC*G*GSQ*PLCEARERCAPHISLLESWSARWVLVRVPHPTPTPEAGCGNSARQPLLH*NFMGAAVNAKTTPVALGGRREGGCGPERGGVCEGRRLGGLPQFC*ELGTKSPLHSSRRSEEEPS*MHMGVGTPVQHQPTRPGASSAASNPGHLCTLIATSLWMLFAYPWGVTALAQQSCEVLEFRLFSSHGHG*SVSVVPGGKAGSRAVEANIVTKLALSQHRD*AF*ASRVPAGSQVVEEWRDLGKVTTSLQSSLADKYH…	0.999065	6.93577e+06	error	45	15.6667
EMBOSS_260_1	1	EMBOSS_260	ENSMUSG00000112274	ENSMUST00000220205	Medium	[H].LAGLKPR.[Q]	LAGLKPR	GTCGTGACCCGCTGACAGAGGAGGCCCAGGAGCGTCTGCGGGAGCCGGTGGGCCCAGGCAGCAAGAGGGTTGTCACCAAAGACTGGTTGGCGGCAATGACTGGCTGCGGAAAGAGCCTGTGTGGAGCCCGCCTCTGATGAGCCGGGAGCTTCCCGCCTCGCTTTTAGCCAATCAGAGATAGTGTGTAGGGGGCGCGGTGGAACTGGGCGGAGTCCGGGCAGGAATGGGCCTGTCTGAGCAAGTTTGCGTGACCTAGGTTGCGGCGACAGAGTCCTGCAAAGCAGTGTGATTTTGGATCGTACTGGCTTCTCCGGGCAGGATCTTGGAGGCCTTAAGCTGATTCCGGCTACTGACCTGGAGCAGGCAATGCGGCTTTCCACGTTGTCATAGGCCCTAGCT…	VVTR*QRRPRSVCGSRWAQAARGLSPKTGWRQ*LAAERACVEPASDEPGASRLAFSQSEIVCRGRGGTGRSPGRNGPV*ASLRDLGCGDRVLQSSVILDRTGFSGQDLGGLKLIPATDLEQAMRLSTLS*ALAFRVWWGTPGITASLLPS*QE*GYP*RGNCVPLVSHLRRKHSRELLFHQPE*KFVSGERDFRDHLAGLKPRQ*WTGPHLDLHCSTLYQV*LFT*TSVSY*NSEDKTSLCPSSQCGRIE*ISFFYIX	0.824539	5.00823e+07	197	96	32
EMBOSS_115_2	2	EMBOSS_115	ENSMUSG00000085438	ENSMUST00000153581	Medium	[T].QDEYFPDLR.[C]	QDEYFPDLR	TTTCGCGCCTCCGCCCCTGGGTTGGCGGACAGGGGAAGGAGCGAAGATGGCGGAGTGAGGCGTGCCCCGGGCAGCTGGCCTGCGGGCCCGGGGCAGGCCTCCCGTGAGAAGCGGAGTACTTGTGCTGGACCGTGTGAGGAACCATATCACACAAGATGAATATTTTCCTGACCTTAGGTGCTTTTATATTCAGCTCAACATTCTGAACTCAGGACTTGGCACGAATTCCTATGTGGACTGCTCAGTGAGGCGTCCTGGTTCTTCCATCCTGTTACTTTCCCCAGTGAGATGCAGATGTCTTTCGACAGATTACCTCCATGGTTTAGGATGCAGAGACTGCCTTTCTTTTACGTCAGACTCAACACAGGAAAGCCGTGAGGATGCAGCCGTCCTGTTGAC…	PPPLGWRTGEGAKMAE*GVPRAAGLRARGRPPVRSGVLVLDRVRNHITQDEYFPDLRCFYIQLNILNSGLGT*VDRDNHPKSCCSGLKGSIEATY*TVKSNRR*R*K*VQASYHGSPLCPALGTWGTEEFLCGLLSEASWFFHPVTFPSEMQMSFDRLPPWFRMQRLPFFYVRLNTGKP*GCSRPVDFSKKTNHGLGSSAAFELERRCLQVEGRC*I*NKCLGSVA*VVFFLKDPNKKTEQIPSVGDFRFFF*CLPILTLL*AQLTAVSSKYLI*FEVKEMLSKFWLTL*QFSWTKTRYDKSRNQV*FCMGVKSLQFYGYKSTFLNKIFLLEKKPVVYKKALDSLIVLNVLLCCSSPSQEGPAGPVASSEWEET*AGTMLTLNCQRVGGQGRKSRCSGP…	3.34809	1.70083e+06	49	47	16
EMBOSS_043_1	1	EMBOSS_043	ENSMUSG00000087679	ENSMUST00000133808	Medium	[T].LVQGSTGPK.[A]	LVQGSTGPK	GCGCGCACGCTAGTGCGCGTCCTCGGATAATGAGGAATTCCTGGATGCTCCGCGCGGGCCCGCGGTGGGCGCTGCGAGGCTTCACCGTGTCGTCGCGGGCGGAGGGGGCGTGAAGACCGTGCTACGGTGGCCGCCGAGGGACAACACTACGGCTCCCACGCTGGGACAAACGCCTCGGGCCCGGCCCGGGAGCGCCCTCCCCTCCGGGCCAGAGCCAGCCGGGGGCAACTGAAGGGCCGCGCGAAGCGACCCCGTCCTCGGCGGCATGTGCCCGCCTTGGCGTCGCACCCCCGGGGCACAAGCTCAGCCGCAGGCCCGGTCCCCAGCACCGTCGGCCCGCCGCATGGTTCCGGACACCGGCACCGCCACGGAGAGGGCACCGGGCCAGCACCTCCCCCA…	ARTLVRVLG**GIPGCSARARGGRCEASPCRRGRRGREDRATVAAEGQHYGSHAGTNASGPARERPPLRARASRGQLKGRAKRPRPRRHVPALASHPRGTSSAAGPVPSTVGPPHGSGHRHRHGEGTGPAPPPRLS*GLLDADDTYAGHPDTAPPLQNSTAAQAQCRSCPSRGGCAPSTARTPPACTQPADR*EPLTWLAPSTTTSMFMSRPAGSMALYASCSTSAAASSQRPFGARWPRSSAYSTWVSAYCCASSSSCQCCCCCWGAGAWTSAS*TSCLSMASM*PCCWLGGWAGASWSLWTCEGPPSMGLLIVPYLASLLEGGAGRGFFFFFFFFFFAPSWR*GLKHTLPLRGEKG*DYSVMGTAHSLAVGFCAVLAVHVTRCAVPVSLLPWVACVF…	6.52645	2.3545e+06	513	30	10
EMBOSS_137_2	2	EMBOSS_137	ENSMUSG00000098318	ENSMUST00000183867	Medium	[T].VCQQLSGWLVFPQR.[R]	VCQQLSGWLVFPQR	GGGTAGAGATGTAGCATCAAACATTCACGGATGTCCAGGGAGCACGGGCACACAGGCTGCTGGCCAGAGGTACTAGGAAGGTACAGGCGGGAGTTCGACGAGGACGCACCTTCCCCTGTCTTGGAAAGACTATTATGAGCACAATACACTAGTCATGTCGGAGATAACAGCCTGACCTCAGCGTGGCTGCAAAATGAAGCCACTTTTGGCTTTCCTAAGCCATCAGGAGGCTGCTCACAGCGCTGCTGGACTCTTTAAGCCCTGAGGTCATGTGAAAAGAAGTTTGCCCTGTGTCCTTCTGTCTCCTGTTGGCTGTCCACAAAATGGAGAAGGCGGAAGCAACCTGAGGCGTCCTCTTTGTCTGTAAAGATAGAGAGTCCATTGTGGAAGGGGGAGATA…	QVPLTECRREASVWVEM*HQTFTDVQGARAHRLLARGTRKVQAGVRRGRTFPCLGKEAAHSAAGLFKP*GHVKRSLPCVLLSPVGCPQNGEGGSNLRRPLCL*R*RVHCGRGRYRNYIGEALPDCISYLQNSFTEKKKINFYLA*ATTVSGLCY*LPNANLN**KSP*RSLSW*MDAACSVALQWWICGSGASWRVPGDKDGLADGGRQ*EYTSQGVTDFLFPQDTSAEVLLYSGSLNVY*WSNLKSAPVSWPQSWAI*KMRTLCA*KKEQQVKNGAGRGISITGKSSDSLQASPRKGLCYT*LSNENTSKSNEDILY*VATVNNVPDVHPSVAYSMNSYTTYF*FIIFIITSSS*D*ARLFHFTLEGHLLFIWIIKI*TDSGSSSFCNPSTCEPEAER…	4.50313	138123198	error	9	3.33333
EMBOSS_065_1	1	EMBOSS_065	ENSMUSG00000097636	ENSMUST00000180489	Medium	[F].QTERLLK.[E]	QTERLLK	GACTTTCTCATGCTCTCTTCCCACAAGCCAACAGTTCCAAAGCCGTGAGATTTCTGCTTCTGCCAACCTAGAGCTGAACGGTGCACCATCTCAGTGACAGCTTCCTTGCAGGCTGACCTACTTTGACCAATGACTTTCAGGATTGTCCTCCTCCAAGCCAACTGCCACATGTGAACGCTAGCCTGCTGGAAAGGGCACACGGAGAATAGTGGTGTCATGAGTGATAGCCCCAACCAGTGACCAGTTGAGTGATGGAAGCCACCTTCCACAGGCAAGCCAATGAACCAAAAATTTGATTCTGCTCCTAGAATTGCCAGGAACACGTCACCTCCTTAGCAGGTGCTCGGAACATATTTGGAAGATGAGTCCCCTCGTATCAGTGCACATTCCTCAGCAAAA…	DFLMLSSHKPTVPKP*DFCFCQPRAERCTISVTASLQADLL*PMTFRIVLLQANCHM*TLACWKGHTENSGVMSDSPNQ*PVE*WKPPSTGKPMNQKFDSAPRIARNTSPP*QVLGTYLEDESPRISAHSSAKSHRLQNFKKKKKAGKRCMCFREPPTVPSTAT*AVSFEPPHNRMGTA*SGHSAPCLCPSTQRVEEGRPEGTGSFSAIFAVCGQPGRPRLGLVKNCGYELQDCCKEQLTP*TLHGERCSERTVGERGTWYQSRNG*GSVCPQDMSFHGLWVRFSHSVIAQLMCVC*RAGSMH*EWLGWAGVVCCVSRGDGGDSLPFPARSASIRVQLVVNKSENAIWVRKRRGGGGGRGASEVTLSVLSAPNLPGNYTLDPQSSESLSPMAENPSSPN…	1.47363	6.73945e+07	833	10	3.33333
EMBOSS_160_1	1	EMBOSS_160	ENSMUSG00000097862	ENSMUST00000181743	Medium	[R].RLSLRAQCLNTVSGPQ.[E]	RLSLRAQCLNTVSGPQ	GTAATGAAGCAATAATGGGCCACAGGTGTTCCTGAGAGGGGATGAAGAGATCAGGCTGTAAGAGGTACTGGTTCCTGTGGGACCAGAGGGGAGATGAGGGACTGGTCTGAGTCTCACTGGGAATTAATTTGCATATCTCACTCCTACCTGGTGCCAGGCAAAAGGGAGGGGGACATAGGGACAGCAGAGTCTGGGAGACCTCGAGTAAGTTGCTAGGAATGGGATTCTGACATGGAACTACAGGGATTCTAAGGAGTGGATGGTTATACTAAGGGGCACAGAAGGCCCCAGAGATGCCAGAGGATCGGGATTCAAACATACCCTACCCGATCCAACCTATTTTTGGTTCCACCAGTCCAATGCCCACACCAGAGAGAAAAAAAAACCTCACCAGCTTCC…	VMKQ*WATGVPERG*RDQAVRGTGSCGTRGEMRDWSESHWELICISHSYLVPGKREGDIGTAESGRPRVSC*EWDSDMELQGF*GVDGYTKGHRRPQRCQRIGIQTYPTRSNLFLVPPVQCPHQREKKTSPASFTVRNTLTTSMGGPCSFKGQDGQARKGRSRGLKACQKQLRNPGPLPERC*AHQVGLCGDGRGAWRNSTS*CQSIRRRAVGG*GHGPGPVT*SQWRPSPLHPPPPLLSWALNSTDKKQARGCP*FSLGRNVRLGDLFR*KGPSKVMSLQPTPRGHLEKGVKLQRRLSLRAQC*LNTVSGPQEVNLSGLGLPLGRRQQVWIGHKWAKPVSESFLCRASRT*VPYCGGFRLGLLHSTCLPQRPL*GKPRDSCRSRS*AGAFSLGEQPRN…	1.53639	449462	error	4	1.33333
EMBOSS_241_3	3	EMBOSS_241	ENSMUSG00000097737	ENSMUST00000180969	Medium	[S].NEEQRLTFSAEGEAGRGR.[S]	NEEQRLTFSAEGEAGRGR	AGGGTATGAACAACAATTTATTTATAACGTTAGGGTATGATGTTAATATTGAAGTTGACTATTACACATATTCATTACGTTTGATCGTTCACTGTCTATATCTGGGGAGATATCCCACGAGCTTAACATGATGGAGCATTCTCAGCAACTGACAGTGCCAACCTCCATCTCCAAAGACTCAAGTCCTGTGGTAGCTGACGTCTCACTCACTGTGTTGCAGCATGCATGGGCTAAGTCAGTGCAACAAGGAGGTAGAGCGTACGTGAACACCCTAGAGGTGTGGATTTGCCATCCCAATTCCTTCACACTCGATGACGTAAGTGTCCTTAGTGGCATCTTCTTCCTCTTCTGATTTCTTCACGGTAAATTTGGCCTGAAAATGGAACAGTAGTAAGTGAA…	GMNNNLFITLGYDVNIEVDYYTYSLRLIVHCLYLGRYPTSLT*WSILSN*QCQPPSPKTQVLW*LTSHSLCCSMHGLSQCNKEVERT*TP*RCGFAIPIPSHSMT*VSLVASSSSSDFFTVNLA*KWNSSK*IHMRGQRAILGWKLRRQS*YQTHLKKVYT*KSRDT*RNATLLSCWDHCCGVCQDRESGSTPRPLTGDRGHVGAGDMWDRGHVQPSQM*ILKHCLLLAKRHHFSSLLFF*NMYLNHLPVRYDIICSH*IFPANLIL*IHNSGSMLRKGR*GGGVAVTNALQHRA*HCSSHLLAKVALKYVIFVDALEVPF*RQRLILSTK*FKSKQLHRFKILRKGFQVCLSF*ESLKYNLTPLFCGLPDQQWSQAFNFHTWNSAPCKWTSQNHCAMT…	2.35475	503286	error	6	2.66667
EMBOSS_217_1	1	EMBOSS_217	ENSMUSG00000097309	ENSMUST00000181277	Medium	[N].WDLFSLEVNSSTPAWDMSRPQSSGLPR.[I]	WDLFSLEVNSSTPAWDMSRPQSSGLPR	GTCTCCAACCTCTTCCGCTGCCTGCGCTCACGGCACTTACCTCCACAGTCGGGATCGGCGCAGTCAGCTGCTCCGGAGTCAGGCTCCCGAACTCCTCGGCTAGAACATCCATTCCATTCACGGTAGAGGAAGAAGTCGGCAGAATGTTCACATCCGCCCGTGCGGCTCCAAGCAAGTAGCACGCGGAGAGTGGTGTGCGTTCTCCTCCGGTGTCCCCGTGGCGCTTGTTTACGGGGAGGCGTTTCAAAAGGTTCCGCCTGGTCAGGGCCTAACCTGCGGAGGAACCCGGAAGTGACCGAGCCGGATGTGGAAAACTACACCCACTGGTGTACTTCCGAGGTCTCGCCGGGCTAATCCTAGCCTCTTGACAGGCTCATTTCCAAAGGAAACGTCAGAGGG…	VSNLFRCLRSRHLPPQSGSAQSAAPESGSRTPRLEHPFHSR*RKKSAECSHPPVRLQASSTRRVVCVLLRCPRGACLRGGVSKGSAWSGPNLRRNPEVTEPDVENYTHWCTSEVSPG*S*PLDRLISKGNVRGTEFVTTTPNKRRIAHNPPTAAQTPIIPAFRS*R*EGIQKFKGILGYLTRSRPAWAT*NPVSKEKVMY**H*LVKDFKDGNGESIRIAKSCIPLIFKKLDTPIKNLYE**THSW*KTKGFVTEIGNEFMQVQW*EKSHGKKR*KMPTVFK*VSVWEHTKIVEMDGVT*VCTMLLAI**LNYLIVHLYN*HHLIICVLFFF*TWSKVICVQS*LVKFQCLYLNVVLIDF*N*VKKERKKLQATKMAQYVKSPATKLEKPRSAPKTHIV…	4.21591	7.64395e+06	1133	144	48
EMBOSS_228_2	2	EMBOSS_228	ENSMUSG00000097908	ENSMUST00000181190	Medium	[Y].ENVLMSLNPK.[L]	ENVLMSLNPK	GTCTTGCTCTGCCTCCTCCCACACCAGAAGTGAGCATCAGGTGGTGGCGAGCGCGTAGACAGGGTGAAAGGTGTGAGGGTTAGCGACAGATCTGCGTATTCACCTTGCTGGTCACCGGCCACCACCACCTCGGCGCCAATGAATTTTCTGTCGCGAGCCCCGCTAACGGCTTGCCGCTGAAAACTCTGGGAAATGTAGTTAGGCGCGAGCAAGCTGTCGTTAGTTGCAGGTCTGAGGCGGGAACCGGGGCTCCTCATGTGTTCGCGGCTCGGTTCAGCCTTCCACGAGCTCCTGAAGTTCTGCCATTCCCCGTGGTCTGCAGTTCAGGAAGCTTCTGGAACATGCGGCGCCTCTGCCATGGAAACACGATCCGCGTCGTCAGCTTCAGATGTGATCTTG…	CVRGSVQPSTSSSCLSFPQSWDYRL*GNHD*K*INSQAGCTCVRFQCSQGRDGEVKTNLRLA*ST*QDADQAGLHSETLSPSITKKKKKSGRVKGPAM*RCLPPSRTA*RQSQSPAPTHGTKQELLKFCHSPWSAVQEASGTCGASAMETRSASSASDVILER*VRLGSCLKVNPVKGPEAAL*GSLAHPCRRTSQCVHSPSVGLRIQAGKKREEL*RT*EGPSLQSRQYLKVSFAFSTESSSAATLREGPCLVAVCHYGLCGIGDGLWPVAFEDELRFQIVFTQGGRRFLTATPSTLALTLATRPPSHISSEDP*RGWSPSPLPSA*RCY*LELC*DAGMTLGRGTW*LSKNGHGCADSPHPACRGG*LRTTLRVTLEVCRLSSRIA*SYTCRGNGNF…	6.57066	5.47448e+06	455	139	46.6667
EMBOSS_167_2	2	EMBOSS_167	ENSMUSG00000097331	ENSMUST00000181578	Medium	[K].QRLQSQEVTQ.[F]	QRLQSQEVTQ	ATTCCTCTGGGGCAAACCAGGCCGGACACCAGACCAGCCTCTTCCTCCAGACAGCGGCCGCTGGCAGGGACGGCGAGAAAGGGCAAGGGTCCCCTGGGGAGGTGTCCACTGAGGCACCCCCCACCCTTCTCCCCGAGACTGCCCCCGGATCCATCCAACCCGAAACCAACTCCCGCATCCCTACTCGAGGAAGCCCCGGAGTCCCGCCGCTTGGTGAGGATGGAAAACGGAAGCAGTAAGTGAAGATGGCAACACTGCCCACGACCACAGCCGCACGTAAAAATAACTGCTGGAGCACAGCGCCCAGGACGAGGTATGGGAAATGAGCACGTGGCTCTGAGAGCCTGCCTGGTATTCCTGCTCATCTCCAGACCTTCAGCAGAGACCAGCCAGGCACAC…	FLWGKPGRTPDQPLPPDSGRWQGRRERARVPWGGVH*GTPHPSPRDCPRIHPTRNQLPHPYSRKPRSPAAW*GWKTEAVSEDGNTAHDHSRT*K*LLEHSAQDEVWEMSTWL*EPAWYSCSSPDLQQRPARHTDEPMATAAVPAIPTSVVYHLAPFQ*SGKNKHLAIGTQSGELLPYPKETPFIHPYASVTT*KEYYLFLIAGFPGH*RAL*RDQTLSEMQWLEEQPTVTEGTLFQVTQCPVKVTPILRP*AVFPLAQVIPFLP*GHTSYAQEDDD*TYCASRACSCLHFLH*LGTCPGTGAEACCHDISLCTREANERDNWHRDRNPGASTPESGKNLKQRLQSQEVTQFRNLENSACNYFYKNTFSHFTFSFLCLLSETESHIAGVGLELLIFLFLL…	1.62388	1.05044e+07	341	220	73.6667
EMBOSS_025_2	2	EMBOSS_025	ENSMUSG00000048603	ENSMUST00000062252	Medium	[R].SGGLGQTSEKAH.[T]	SGGLGQTSEKAH	TGAGGCCTGGATCCCCAATTCACCCCTCCAGGCTCGCCGGGGCGCACAGGGCCCCTCGCCCCTCCCCCGCCCGGCCCGGCCCGGCCTCGGGCTCAGCCCCACGGCGACCGAGCATCCCCCGCTCCCCGCCGCCCTGCCCGGCCTGGGCCGAGGCCTCGCCACGGCCTGCCCGGCCCGGCCACTCTCCGCAGGCCTCGCGGTACCTGAGACTCCCGTCCTCGGCTTCCGCCGAGAGGGAGAGAGGGCGTCGCTTCGGCCCCGGGCCAGCCGCCCCTGGCTCGCCCTCGCCCCCGAGAGTCCGCCTGGGTGGGAGCGCCCGTCCGTCGCATCGCTTTCCTCAGCTCCGTCCGTCCCCTCCCTGCCTCGCTCCTGCCGGGAAACGCCCGCCCCACCCCCAAC…	EAWIPNSPLQARRGAQGPSPLPRPARPGLGLSPTATEHPPLPAALPGLGRGLATACPARPLSAGLAVPETPVLGFRREGERASLRPRASRPWLALAPESPPGWERPSVASLSSAPSVPSLPRSCRETPAPPPTPGLLPRRRPRPFFCTLSEWKWRRAGN*GSRSGGLGQTS*EKAHTRGDARWQLEGGRK*RDATSSRIQEAELASPRMRSRGPVRGCFFPFVQRRAGSSTGELGPAVAVRGPGKGRG*IGQ*GSL*SCG*ISLPCGHPVGRPALSSRLQCLLNAGCK*KTIEI	27.5167	1.24834e+07	error	460	153.667
EMBOSS_114_1	1	EMBOSS_114	ENSMUSG00000097770	ENSMUST00000180479	Medium	[R].ESCQPQGAGVGKQIFIFTNY.[L]	ESCQPQGAGVGKQIFIFTNY	CCACAGCCATTGGAAGCACTGCTCATGTTTATTGGAAAAGCAGAACATAAGACATCTTCGGCTTCCACAGTTCTCCGAGTCCTGACTCCATCACCCCTAAGCTTGCCATTCATTCCCTTGGGAGGTAACAAAAGCGCTTTAACTTAATGCTCCCAGGGAGAATTAATGAGAAGGCACACCTCTGTAGCATATTATGAATAGCACTGCTTAAAGAGGCTGAGTGGGGGAGAGTGGATGAAGATTGGTCCCAGAATAGAAGTTCCTTCCCATCATGCCCTGACCAGCCAAGGGCACAAACTTATCCCCACCCCTACCAATACTCATGTGACAGGAGGGACTTCTCACAGAGGCCTGGACTTCCTGCAAGCAGAAAGGCGGCAGTGTGACAGTAATGACCAC…	PQPLEALLMFIGKAEHKTSSASTVLRVLTPSPLSLPFIPLGGNKSALT*CSQGELMRRHTSVAYYE*HCLKRLSGGEWMKIGPRIEVPSHHALTSQGHKLIPTPTNTHVTGGTSHRGLDFLQAERRQCDSNDHFYQYHVSGMGSRWSMV*S*RILSIGGTVWHGIRSGGPPLEAMNQQPLH*LLSNTNGT*SNMAMGRIVKALLLKESVCYANTSMGYT*TFYENLSSVCVCVCVCASQ*P*TRSHGKLR*HKVKTPQS*VELNSSLET*VMKYGMSIKAITL*IKTSCRESCQPQGAGVGKQI*FIFTNY*LPQLLAQFPYL**TH*VLTSFSFGRNGD*STGGCPAHLHVDTISKNTRKGRTFQNILEHACVCQPWLLSLNTDSLLKQESPVISSCI…	1.09274	700608	error	25	8.33333
EMBOSS_320_1	1	EMBOSS_320	ENSMUSG00000099881	ENSMUST00000186531	Medium	[R].RLLQEQR.[Q]	RLLQEQR	GTCCGGGAATGATTGGCATCCGTGCGTAGGAGACCCAGGCGGAGAAAGCCGCTGGATTGGCTGACCTCCCTGCCACGGGACACGACGATTGGCCCTACTCGGTGCCGGAAGTGATGAGGCCGCGGTCTGGAAACAAGGTTGTTGTCGAAGGAGCCAGAAGGTGGGAGCCGGCTTGTACCGGCTGGCCTTGCGCTGCGGACGCGAGGTCGTGTGTCGCCTGTGAGCCTGTGTGAGCTTCGAGAATGTGTGTCTCTAGCCGGCAGGAGGCTCTTGCAGGAGCAAAGGCAGCCGGGATGATGGCCGCGAAGGAGAAAGGCGGCCTCGGCCCCCACCCGCGATCCGGCTCTTTCCTGGAGGTGTTCCTGGACTGCGCTTCGCTCCGAGTCCCGTGAGCCACGT…	VRE*LASVRRRPRRRKPLDWLTSLPRDTTIGPTRCRK**GRGLETRLLSKEPEGGSRLVPAGLALRTRGRVSPVSLCELRECVSLAGRRLLQEQRQPG*WPRRRKAASAPTRDPALSWRCSWTALRSESREPR*QPGCGELQTLPGGFLRHRARFSRLPSPAPELHRDGS*NNNNNKKKG*RTSELGSKVASSCA*LFEFTERGKSLMMVCVSSDLVCKRAKNSNPSAVVTETGVSGAQSTLL*TFRVQDLSSMKPLSQKNA*SNCDESDMLV*AFYPGT*AEAGWISEFRAS*GYTVKANFII**NIK*QVTRAGEMARRLRARAALLGTHLRQLHSHLQRT*HLLTFQELTPE*STHTYRLHINLLK*MGPGEMTCRSKALTGCSSRGSGFDSRHL*…	1.37377	2.66237e+06	89	9	3
EMBOSS_377_1	1	EMBOSS_377	ENSMUSG00000115801	ENSMUST00000226445	Medium	[K].EPRCPSTEEWIQ.[I]	EPRCPSTEEWIQ	GAATTCTTTGTTCAGCTCTGAGCCCCATTTTTTAATGGGGTTATTTGATTTTCTGGAGTCCACCTTCTTGAGTTCTTTATATATATGGGATATTAGTCCCCTATGTGATTTGGGATAGGTAAAGATCCTTTCCCAATCTGTTGGTGGCCTTTTTGTCTTTTTGACGGTGTCTTTTGCTTTGCAGAAGCTTTGCAATTTTAAGAGGTCCCATTTATCGATTCTTGATCTTACAGCACAAGCCATTGCTGTTCTATTCAGGAATTTTCCCCCTGTACCCATGTCTTCGAGGCTTTTCCCTACTTTCTCCTCTATAAGTTTTAGTGTCTGTGGTTTTATGTGGAGTTCCTTAATCCACTTAGATTTAACCTTAGTACAAGGAGATAGAAATGGATAAATTCG…	EFFVQL*APFFNGVI*FSGVHLLEFFIYMGY*SPM*FGIGKDPFPICWWPFCLFDGVFCFAEALQF*EVPFIDS*SYSTSHCCSIQEFSPCTHVFEAFPYFLLYKF*CLWFYVEFLNPLRFNLSTRR*KWINSHSSTR*PPVVPAPFVKNAVFLPLDGFSSLVKDQVTIGVWIHLWVFNSVPLVYLSVTIPVPCSCDHNCSVVQF*VRHGDSTRGSFILEKSFCYPRFFVIPDESADCPF*FIEGLSWNFDGDCIESVDCFWQDSHFYNVDPANP*AWEIFPSSEIFFNFFL*RLEVLIIQIFHLFS*SHAKVFYIICDY*EGCCFPNFFLSLFILCVQKGH*LV*VNFISGYFIDAVY*A*EFSVGIFRVTYIYYHIICKK*YFDFFLSNLYPLDLLL…	7.81892	2.39794e+06	1762	35	11.6667
EMBOSS_006_1	1	EMBOSS_006	ENSMUSG00000021268	ENSMUST00000143272	Medium	[R].GSKEDTETVTRQ.[R]	GSKEDTETVTRQ	GACTTTTGGTAAATCACCTTTTGCCGTTTCCTTTGTCCCCGTGAAGCCCCCCCTGGCCGCCCCCTCCTCATTCTGGGCTGGCTGGCTGAGGGGGGGGGCAGCCTGAGGGCTGCGACGTGGCAGGTTTCTAGAATGTTCTATTGATGGCCGCAAGAGGGCGCTGGTGGCACTGCGGAATTTTGGGGGGCGGGGTGGGGAGGGAAGAGGAGGTGGCCTTTGTTCTCCTGCAGGAGGGGGTCGGGAGCGAGATGGGTTGCGGGACCATGGGTTCATTTACCTATGGGGAAATGTTAGTAGATACCTGGATTCACTAAGGTGCGCTTGCAGGACTTACAATAGGTCAGAGATGGCGTCATCTGCAGTGGCTGTGTGATTTAGGGTGTCATGGACGCAGATTAA…	DFW*ITFCRFLCPREAPPGRPLLILGWLAEGGGSLRAATWQVSRMFY*WPQEGAGGTAEFWGAGWGGKRRWPLFSCRRGSGARWVAGPWVHLPMGKC**IPGFTKVRLQDLQ*VRDGVICSGCVI*GVMDAD*FIFSDLCFLGS*KGVAF*GRIAKNIN*LGVIHKGLES*RGKGGARF*GEGC*LGGGRQGGLPLFCHIAEDLKNECSVLRIESLNFNYA*LDLLMVGGGSVLLLLIRSRIVVWGQPLTAGSLWCKAAPGCLCVCCVMSGKWLRQRRWGCIATLKDG*CGLCPPPPSLKPVGRPPPSYVSLALAAASWRLWGCLRWLGYWSLSECGPRAP*RSLCANGSWPARLALELRMRTQLTLVTCQSIHLYPSHCCPPLPFLLLLLLPFLLSLF…	6.90162	8.31549e+06	error	133	44.3333
EMBOSS_241_1	1	EMBOSS_241	ENSMUSG00000097737	ENSMUST00000180969	Medium	[R].KEAVCISSNKQEAIEE.[K]	KEAVCISSNKQEAIEE	AGGGTATGAACAACAATTTATTTATAACGTTAGGGTATGATGTTAATATTGAAGTTGACTATTACACATATTCATTACGTTTGATCGTTCACTGTCTATATCTGGGGAGATATCCCACGAGCTTAACATGATGGAGCATTCTCAGCAACTGACAGTGCCAACCTCCATCTCCAAAGACTCAAGTCCTGTGGTAGCTGACGTCTCACTCACTGTGTTGCAGCATGCATGGGCTAAGTCAGTGCAACAAGGAGGTAGAGCGTACGTGAACACCCTAGAGGTGTGGATTTGCCATCCCAATTCCTTCACACTCGATGACGTAAGTGTCCTTAGTGGCATCTTCTTCCTCTTCTGATTTCTTCACGGTAAATTTGGCCTGAAAATGGAACAGTAGTAAGTGAA…	RV*TTIYL*R*GMMLILKLTITHIHYV*SFTVYIWGDIPRA*HDGAFSATDSANLHLQRLKSCGS*RLTHCVAACMG*VSATRR*SVREHPRGVDLPSQFLHTR*RKCP*WHLLPLLISSR*IWPENGTVVSEYT*EDRGRS*DGS*GDRVNIKPI*KRYTHKNQEIREEMQPFFHAGITVVEFVRTENQAPLHAH*LGTGDMWEQGTCGTGDMCSQVRCRF*SIACCWRKGIISLPFCFSKTCI*TIYLSGMTLFALIKFFLPI*FSKYIIQEACSERVGRAEEWR*LMPFSTEPNTVVLTY*LK*L*NM*SLSMLWKCHFKGKG*SFQQNNLSQNNYIGLRF*ERDFKCALASRSL*STI*HHYSVAFLTSSGHKLSISIHGTVRRVSGHLKITVP*…	2.35475	6.15941e+07	error	6	2
EMBOSS_220_2	2	EMBOSS_220	ENSMUSG00000098001	ENSMUST00000182891	Medium	[K].GQSGSPCLSAKCLT.[R]	GQSGSPCLSAKCLT	AGTGGTTCTTTAGACATGGAATGGGACGGATGAAAGCTGTAACCCACGTTCCCATGGCCACTTCCCAGTGGCCTTCTCTGCTTCTAGAGTCTGAAATAGAGCTGGCAGCTCGGCTTCCCATGAAGTGAGTGAGAGGCAAGGGATGGAATGCAGTTGGTAAGATACACCAAGTCCTCGCTAAATCCTTAACAGCTCATATAGGGTGTGCTGGTACCTGCTTATCATCCCAACCCTGGGGCTGAAGAGGTAGGAGAAGCAAAAGGTTATCCTTAGTTACACAGTAAGTTTGAAGTCAGCCTGGGCTACGTGAGATCCTGTCTCAGGGCAGACATGGAGGTGAGTACTAACAGAGGAAAGGGAAGAACAGAGGAGCAGGAATGGAGGAGGAGGGGAAAGGAA…	VVL*TWNGTDESCNPRSHGHFPVAFSASRV*NRAGSSASHEVSERQGMECSW*DTPSPR*ILNSSYRVCWYLLIIPTLGLKR*EKQKVILSYTVSLKSAWAT*DPVSGQTWR*VLTEEREEQRSRNGGGGERKEEEEGRRGEGRRGGRKKGKN*RQASIARGPLSFPASFQLLCNSGQVPKGEIPRKSQRLT*DLLGRHCWP*DGVELGQHWSSVYLHLPHFLLYGFPNNAFGVL*YVILPY*IYLFQNSFLHNFIHITVMSMQCQKQRQIQKCQDILNRDKFTRFSSFNDSNLPCNLHILVAWLKQMLNLL*ESKLLTFCFVLYIRQGLSMQP*VFWNLLCRPDWP*LITNF*LSQLIAHSKSVYLSPCLLLCVAYRMNAGEKGCIELKRSQGWAESK…	1.92346	2.18377e+06	474	16	5.66667
EMBOSS_075_1	1	EMBOSS_075	ENSMUSG00000097393	ENSMUST00000180524	Medium	[L].LAHPDVLK.[L]	LAHPDVLK	AGAGCGTCCGGGACAAGCGCTCTGTTTTGAATCTTTGGCATCTTCAGGGATGGATGGAATCCTACAACTGAGGGAGACTGCGGTCTTGGGCGTGAGCAAGTGAGGAAAAGCGTGCTGGAGCGACCAGCAGCAAACCTCCTCAGAGAGGGTTCCCGCGCGCGCTCCACACCTTTCCCAGTTGTGGTTTACACCCCACTGACTTCTCTCATCACATCCGTGTCTCCATCACCATCAGATACTTTTCTCAGTGCGTCTGAAAATGATGGGAAAGGCTCTCAAGCAGCCTAACGAGCACACTACCACCAGCACCCTTCACAAACTGAGCCCAGAACTTTCTTGAAGAAAGGATGCTGCTGGTCTCCCAGACCTTCCTGCTCAAAACCATAAGTTGGAAACACT…	RASGTSALF*IFGIFRDGWNPTTEGDCGLGREQVRKSVLERPAANLLREGSRARSTPFPVVVYTPLTSLITSVSPSPSDTFLSASENDGKGSQAA*RAHYHQHPSQTEPRTFLKKGCCWSPRPSCSKP*VGNTLQRAAKSYVLDIFIKY*AAVVVHLTLAVTNSP*IGFKTCSPRGKVCCVLEN*PTAQSL*SQVS*RRTYKSPFY*TSTIRQVTNLPTALLAHPDVLKLSRVCSEQPLGIIQSLPST*DLSVSPVLGMKSPYARYRTP*TMSCEASLVELVIKNGCDQALYGHCPHSKDACPVEGMGHSRAHPVCSVTSPYETSRSLPCPVITRVIIIPPAADGDKDRQPQPDPVQKRLPLAQRPVPTEHLQDSQQRRNHVQDPGLCLERNGVMAETT…	0.724679	7.91833e+06	222	50	16.6667
EMBOSS_193_3	3	EMBOSS_193	ENSMUSG00000097542	ENSMUST00000181218	Medium	[R].QDVETKASTQLIVTVEAIARHM.[D]	QDVETKASTQLIVTVEAIARHM	CCATTTTAACTGATTTATTGAAAAATAAAAATCACTTGAAAGCATATGATGGGAATTGTACTTAACAGAAAGAGGTGTTTGAATATAGCCCTGGGGCTGGAGAGTGAGGCTGACTAACGTAGGAAAGGGGGGCGGGGGAGGGGAGGCAAAGCTAAGGTGGTGGGAAGAAACAGTACCTGCTAAAAATTCTACAGCTAACCTTTCAGCACCCCGGGGAGCTCCCAGCATCTATTTCTGGGCAGGGTTTGCCAGCTGGATTGGCTGAAGAACAGCATTCAGGTAGTTTATCTAGAAGGGTTAGGAAACGAAACGGCATCAAAGGGAACAGAGGTACAAAATCTGAAAGGATTCTCATGCTTAAACATGTTGCTAGAACCCCTATCGTGGTGAACCTGAAGT…	ILTDLLKNKNHLKAYDGNCT*QKEVFEYSPGAGE*G*LT*ERGAGEGRQS*GGGKKQYLLKILQLTFQHPGELPASISGQGLPAGLAEEQHSGSLSRRVRKRNGIKGNRGTKSERILMLKHVARTPIVVNLKSRRFIRVPAQPPTSCVTAGKSFPSLLCCESWAQRQPSLRTQHSAASCLAT*AQPDNRIGSSRNELLGIGARTAWC*PFSPDRELSCVEMQSGENQPS***KAHSCCDNELGTPAVRERHTEADSGYCS*PEQSSPIEGDG*TARSRGL*ALAVGERSQRNKRKSHPVPGRVSNYTHQMPSP*SRA*TPLNLIEAALPVQRPRLVSKSSTPVR*PPSQQGSGIISVDWNQMR*ANSSPPTTSP*EQVGGLWLITSTQRQQASWRHGKA…	6.02097	1.23158e+06	1158	46	16
EMBOSS_306_3	3	EMBOSS_306	ENSMUSG00000112980	ENSMUST00000220477	Medium	[F].NLFLDSYTMMIAPLMNLITGSAGR.[E]	NLFLDSYTMMIAPLMNLITGSAGR	AGAGCTGCTGGCTGTGTTTCCCGCCCTCCGCCCACACACACCCACCTTCCTTGGGAGCGCTGCTGTTGCTTCTGTGTTCCTTGCCAGCTGCTCGGTGAGACGTCACGCTGATATCAGACGGAGGAGGGAGAGCAAGTCCGAGACTGCTCAAGTGGTAACCAAGAAGATTCTTGAAGAAATCCTGCCTCGGTTCGGGATCCCTAAGGTAATCGGCTCAGACAATGGGCCCGCATTTGTTGCCCAGGCCCTAGAGGTTGTTAAAACACAGATCTGCAACCAGATCAGAGAAGCCTACACTCCGGGAACCATAGCAGTGCCTCACGGGTTCCAGGTTGGAGACTCAGTCTTGGTCAGACGACATCGCACTGGCACGCTTGAGCCCCGGTGGAAAGGACCGTA…	SCWLCFPPSAHTHPPSLGALLLLLCSLPAAR*DVTLISDGGGRASPRLLKW*PRRFLKKSCLGSGSLR*SAQTMGPHLLPRP*RLLKHRSATRSEKPTLREP*QCLTGSRLETQSWSDDIALARLSPGGKDRIWCC*PPPRQ*K*TGSLLGSMPPTSKRHPAKMKTTGWWQPLTILLSFAWVTGVTLGLKNHNPHQPLTLTWQVLGPDSDQVLFTTSKTAPPGTWWPDLAFCLKQIIPAARSTPPNLVRSYGFYCCPEHSKWSLCGGSASYYCGQWNCVTSNDGDWKWASGHVPDRAEFSFQNSGPGKHTVMELYKRADCRPDDLDRVLIKFTDTGKKYDIKAWIRGMRWGLVFYDYSGKPGSSVMVRLSLSSPRPNQ*DLTLF*LKSLRYCFPGLPSL…	1.77367	1.16144e+06	error	222	74.6667
EMBOSS_209_2	2	EMBOSS_209	ENSMUSG00000097118	ENSMUST00000181863	Medium	[-].DLWSPFQLISIRACPGGGG.[G]	DLWSPFQLISIRACPGGGG	AGATCTCTGGAGCCCTTTTCAGCTCATTAGCATTCGTGCTTGCCCTGGGGGGGGGGGGGGAGAATCCACCATTCCAGCTCAGGCTATTCTGCTGCCAGCTCCTCCCCTCTGTGAGCAATGTTCCTGACTTCAGACCTTGCCTGAACATTCTCCATAGCACTTGCCTTCTTTTCCCTGAAATCAAGGCAATATGTCAGTATTGAGTGAATCCAGACATCATAGCTCGGTAAGGCATAGTGATATTGATTGCTTCTTTGTCTCAGGAAGTATAAGAACTGACAGATCTCAAAGGTAACCTAGCAACGTTTTATATGACAAAGCCTTGCCTGCCTTCCTGCCCTCAGATCAGCCTGGAAATCAACCCCTGAGGAGCCTTTCTCAGATTTAAACACACAAATA…	DLWSPFQLISIRACPGGGGGESTIPAQAILLPAPPLCEQCS*LQTLPEHSP*HLPSFP*NQGNMSVLSESRHHSSVRHSDIDCFFVSGSIRTDRSQR*PSNVLYDKALPAFLPSDQPGNQPLRSLSQI*THKYHSWCPVFWNVSLDSHGQASCSL*FMPSPDLGELSQMGCCVSLMSLEHPGLEIRQCPGLDLKAF*KMESDSQFLLFQCNALSFTQTAVLDWASQILGG*ETVNVACCCKTPTLCVS*TPRNEAQHGVLCSFTFSLKER*DG*PT*ASDPLCKGPRTFTQLPQSS*SILPLTFGER*AVIHHPHIYDAYPVLPSLYGSFFKNLHCNCWRSISSAPCGLRAQSQHADTI*INIMQYC	0.949135	2.88475e+06	1	118	39.6667
EMBOSS_151_2	2	EMBOSS_151	ENSMUSG00000097811	ENSMUST00000180790	Medium	[T].QRTEADRQRPATFPER.[S]	QRTEADRQRPATFPER	CACAGAAACCATGTGACTCGTGTTTATTCTATAAAGATCAGGAGATACACAAATCCAGCAAACTCCCACCGACCAGCAGAGGACCACTTTCTTGGGATCTGCTTCCTGTGTCCGTCCACATGAGAACACACGCTTTGTCTCAGGTGAGAAGGGGCGAGCCCTGCCTGCCCAGTGTCTAGCCTCTGGCCAGCTGTGCAGCTCTGCCAAGCCTTAGACACATAACTTACGTCGGACCACATTTTGCACAGATTCTGAGGTAGTCCCAGTGATGTCTGCTTGGCTCCTCTCCTGCTCACTGCACGTTAGTGTCCTCGGTTGGTGTGACCCCCTGACCTGCTGTAACTGACCCGTACATGAAGCTGGCCTGTGGAATGCTCTCCCAAGTAGGACCCTGAAGGG…	TETM*LVFIL*RSGDTQIQQTPTDQQRTTFLGSASCVRPHENTRFVSGEKGRALPAQCLASGQLCSSAKP*THNLRRTTFCTDSEVVPVMSAWLLSCSLHVSVLGWCDPLTCCN*PVHEAGLWNALPSRTLKGGPTFPSRGILKRCSPWPDQSCLKPHHRNLNTHNTRKVETS*AVPGTLDGACTTGRFRLS**EPVLPPKQGSCSVSAVC*NGL*RRELESVSRPIHYFN*LIKLIKDKVSLCSSGCPRTPSVDQNSQGYIERPCLKHTPETETQR*TEADRQRPATFPERSGIFSPRDGSASGASHPNREGMTAKGGPGQDPNQSGRNTHRRGDTQPSRAPDLWRSGSAETWPDRRGAQGPVQNPRRVSRPPGAHEPAAPSLSPSSLEVSAC*QRRL…	2.89779	537139	error	11	4
EMBOSS_347_3	3	EMBOSS_347	ENSMUSG00000113204	ENSMUST00000220478	Medium	[A].PFLKHESKPRR.[F]	PFLKHESKPRR	AGGCGGATGAACAGCCAGAGCTGCAATGGTGGATCCTCCTCCAGGGCTGCATGGGACGACAGATAGATGAGGCTCTAGGACGGGCACAAATGCTACCCGAATGCAAACCACTCCGGAGATCTGTAAAAGGACTGGCCCCGGACAGGAAGCACACTTTAAACTAGAGGCGGGGTAAGACTCGTGGGCCAATCAAGGCTTCCGAACAGAACTGCCATTCTGGCAATGAGGCGGGGTCTTCCGGTTGCCTGCTGGAAGTTTGTTTTTGCTCTGCAGGATTGAAGGGTTCTCCCTATGCTGCTTTGAGCGCTGCTATTGGGTGCCTTGAGGGGACCTCAAGTAAGCTCCATTTTTGAAACATGAGTCAAAGCCCCGGTGAAGATTCTGTGACGGTTCATTGTA…	VCFGVQA*IVLSVLL*VLLLGALGGP*GSSEVETW*VRDHCPQRGGAGG*TARAAMVDPPPGLHGTTDR*GSRTGTNATRMQTTPEICKRTGPGQEAHFKLEAG*DSWANQGFRTELPFWQ*GGVFRLPAGSLFLLCRIEGFSLCCFERCYWVP*GDLK*APFLKHESKPR*RFCDGSLYNL***RLSCILRKRDVEISKALRNLSCRHAHREREYPN**ELTGIGPSKPLESEVHCVSNKDLHPHLEV*SLAKNIQNRFSFSGWQVFMTSILPKASESLDCRMQ*LMMMCV*TSLRKSGICWILPRKVSMKR*C*RHTRTSLL*ATIGKTIILKNIVKVLEDMKGMKEFILERNRMNVTNGVKPLQVTIISKYVKEQILERNLMNVINVVKPFHNRVV…	7.1318	935921	error	7	3
EMBOSS_061_3	3	EMBOSS_061	ENSMUSG00000073000	ENSMUST00000101281	Medium	[R].FFLPNLSCPLL.[E]	FFLPNLSCPLL	AGGAAGTGGGTCGCTGAAATTGAGATGGCCACAGAAAAGGGACCATCAGATGTGCGATCATGCAGTCAACTGTGCAGGCTTGCAGGATTGGAGCCCTCGGATACAGGAGCTGCACTGTGGCCAAACATCCCTGTTTCTTCAGGTTTGGGAACAAATCGAGACTGTTTTCTTCCCGAGAAGCAAACACTTCAGATAACTAGCGGCAGTTCTTAGAAAGAATGTGAACGGATCTCCCCACCTCCGAAGCTGTCTGGAAACCTGGAAAGTCTATTCATGAGGAAAGAGGATTCACGATGACTGGAGATTTAATCAAGACCTTGTACGCACTGGGCATGGGCTTTTCTGTTGAGCTGCATCCTAGCCCTTTTATTTTGATTTGTGATAAAAATTGCAACATCT…	EVGR*N*DGHRKGTIRCAIMQSTVQACRIGALGYRSCTVAKHPCFFRFGNKSRLFSSREANTSDN*RQFLERM*TDLPTSEAVWKPGKSIHEERGFTMTGDLIKTLYALGMGFSVELHPSPFILICDKNCNILIQIL*PNRKGRTQSCSCGYPVIDMDFCYNL*VNRECDGLNVLCPGSSAMRRCGPVRVGVSCGLGLQDPCPSCLEVSILLSAFR*RCRILISYCTMPA*TLPYSCLDDNGLNL*ACKPAPIKCCPDESCLSRGVC*QQ*TPN*DIGLC*LMMFAFENSPTAN*RQDTSLSLKESMGRREHLLRQSRGRLGMSFSQVQGLMLQGWNTARDTTEKRGPS*RWATYRRG*WQRPSRLHKSLLVYMCITRVPGVC*GLKKTLDRSPGTRVM…	1.91728	3.86328e+06	439	25	9
EMBOSS_086_3	3	EMBOSS_086	ENSMUSG00000097380	ENSMUST00000180679	Medium	[T].RMNPGPCTMILLSQPPK.[S]	RMNPGPCTMILLSQPPK	TTAACTGCTGAGCCATCTCTCCACCCCCTAGTTTAATTATTTTTAAAGACTTATTTAATTACTTATTTATGTATATGTATGTGTGTTTATGTGCATGCAAATGAATGACTTCAGAGGCCAGAAGAGAGCATGCCCCGGAGCTGGAGTAACAAGTGGTTGTGAGCTGCCCAACAAGCCTTAGCAACTAAACCCTGGACCTGCAAGCACTCTTACCCACTGACCTAGCTCTCTAGCCCCTTAATCATTACTACTTTGTCCCTTGGGACACTAGGATGAACCCAGGGCCTTGTACATAATAGATGATTCTCCTGTCTCAGCCTCCCAAGTCCTGGAATTACAGACCACTATACCCAACACCACTGGACATTTTGTTTGATAATTTATATTATTTTAATTTCA…	NC*AISPPPSLIIFKDLFNYLFMYMYVCLCACK*MTSEARREHAPELE*QVVVSCPTSLSN*TLDLQALLPTDLAL*PLNHYYFVPWDTRMNPGPCT**MILLSQPPKSWNYRPLYPTPLDILFDNLYYFNFICLCF*KVSCYILNHFVLNSQKSICLCLQSTRINSGICLSLPPVLASKACATTLANMWVISEFFFHN*KIIITEENSEYF*KKLLLLMCMGVLPAVNVLYERPGLMEARGGNFSRTGVTGGCEQSHRHWKQNSNPEQNC*PTSPVVNNSVQIM*FLFISFSKMTQKSKDACLQGKDQNTLNIKHSILYISTV*LLNKSICNGTNFKMFIIIVCANVWAIHAVCPRGGQGTTVRETALSLYHRFQGLNSGPKAWRAAFSWSQPSCQSK…	1.56159	3.06252e+07	error	69	23.6667
EMBOSS_167_3	3	EMBOSS_167	ENSMUSG00000097331	ENSMUST00000181578	Medium	[F].LQTAAAGRDGEK.[G]	LQTAAAGRDGEK	ATTCCTCTGGGGCAAACCAGGCCGGACACCAGACCAGCCTCTTCCTCCAGACAGCGGCCGCTGGCAGGGACGGCGAGAAAGGGCAAGGGTCCCCTGGGGAGGTGTCCACTGAGGCACCCCCCACCCTTCTCCCCGAGACTGCCCCCGGATCCATCCAACCCGAAACCAACTCCCGCATCCCTACTCGAGGAAGCCCCGGAGTCCCGCCGCTTGGTGAGGATGGAAAACGGAAGCAGTAAGTGAAGATGGCAACACTGCCCACGACCACAGCCGCACGTAAAAATAACTGCTGGAGCACAGCGCCCAGGACGAGGTATGGGAAATGAGCACGTGGCTCTGAGAGCCTGCCTGGTATTCCTGCTCATCTCCAGACCTTCAGCAGAGACCAGCCAGGCACAC…	SSGANQAGHQTSLFLQTAAAGRDGEKGQGSPGEVSTEAPPTLLPETAPGSIQPETNSRIPTRGSPGVPPLGEDGKRKQ*VKMATLPTTTAARKNNCWSTAPRTRYGK*ARGSESLPGIPAHLQTFSRDQPGTQTSLWRRQLSLPSQHQWFII*LLFSSQVRINIWQSVPSLENCFLILRRPLSSIPMLQLPPKRNITFSLSLASRDTREPCEETKL*VRCNG*RNSQQLLKELSFRLPSALSRLPPFSGHEQSFL*PRLSRSYLEVILPMHRKTMTKHIAHHEHVAVFIFYTDSVHAQELGQKRVAMTFHYVLGKQTKGTIGIGTGIQVLPPQSQAKISNRGCKVKRSHSSETSRILPATISIKIPFPISPFHFFVCCLKLSLT*LGLVLNS*SSCFYF…	1.62388	5680778	15	220	74
EMBOSS_397_1	1	EMBOSS_397	ENSMUSG00000113774	ENSMUST00000220780	Medium	[K].QLLLPGKQSNQ.[E]	QLLLPGKQSNQ	AAACGTGAAGACAACCTAGGGAAAAAAAATGTATACAAATCCCCACAAAGCAAACATGGACGCGTTCTATTCGGGGGCTTGCGGGCATCTTGCAAGGCGTTTAAAAGCCTGCACAGGACAATGGGGGCAGTGGGTTCGGCAATTTAGCACAGAAGAAAACAACTTCTCCTCCCTGGAAAGCAAAGCAACCAAGAAGCCTCGGACACTGTCGCTCTGCCTCACCCGACCTCTCCGCCTCCGCACTGACCGTGTCACGGCCTGGCCGAAGACGGCGCCCTCAGCTCTGCAGAACAGCGCCGCAGACCTTGTCAGAGGACAAGACGCCAAGAGCACACAGCTATGCCCGCACCACGCCCGGCGGCCATCTTCCTAGGAGTCAGGAACTGACAGGTCACGTGG…	KREDNLGKKNVYKSPQSKHGRVLFGGLRASCKAFKSLHRTMGAVGSAI*HRRKQLLLPGKQSNQEASDTVALPHPTSPPPH*PCHGLAEDGALSSAEQRRRPCQRTRRQEHTAMPAPRPAAIFLGVRN*QVTWSCGGRCSLWPRLLEGAVWEELQVLKWLGRPSLYFKGMETLLLCLVWLQMVWVGLGWVGLGWF*YRVKVAQAGFKLAM*PRMTFTLPILLPPPPS*PS*ISV	1.8488	576728	54	29	9.66667
EMBOSS_235_2	2	EMBOSS_235	ENSMUSG00000086859	ENSMUST00000182811	Medium	[I].LQTGALLK.[L]	LQTGALLK	ATTTGCAGAGCTGGTTCCGCCGGGGAGGAGAACTCGCGTGCTCCGTGCAGAGGGGATGCATCCTGCGCAGCGTGGCTCGGGGGCGCCGTGGAGCCTCCCGAAGGCGATCGAAATGAACCACATCCCCCAACGACTAGACGGAAGCACGCACAAGCTCCTTCCTCCCGAGGAGCGTTTCCAGTGACTTGAGCTTGGTTGGCCCAGGTATGTCAATCCTTGGGGGTGGGACGGTGACCTGAGGCCGACGGTCTGGGAAAAGGCTCCTGTGTGGCTGTACCCGCCCGAGGTGGGTGCAGCCCCGTACCAGACAGCCCGACCTTGACCTAAAGTAAAATCCCAGAGGAGGAGGAACCTCTTCCCTGGGGTTAGAATTTGCAGTAACAGGTGTGGACATCCTAG…	VPPGRRTRVLRAEGMHPAQRGSGAPWSLPKAIVGFRNLSRDSHGRRLTPGRHAIAGWAGVVGRP*ARAAIGGALAASVLQAPHGFVRLHRIVLNCLFISPPRK*TTSPND*TEARTSSFLPRSVSSDLSLVGPGMSILGGGTVT*GRRSGKRLLCGCTRPRWVQPRTRQPDLDLK*NPRGGGTSSLGLEFAVTGVDILAAVWWSCMILQTGALLKLWGLSTVLQKQIFDHYSSPSL*IKKRKKTYSLFYFILECGCLPGAPKGSQEGTRFPRSGIIEYCQPRCGCWELNPGPLRGQQVFSFNAEPSLQQLHHPALR*GLT*PRLAFTH*VAEGSL*TSNPPSSASGSRLDDRHPRAHVVYGMYG*SSRLYAC*EVFYSWVSVPPTWSLNKDAYSCDSRR…	12.109	7.98608e+06	208	56	19
EMBOSS_197_1	1	EMBOSS_197	ENSMUSG00000097651	ENSMUST00000181967	Medium	[K].KGSQCSHSILK.[A]	KGSQCSHSILK	AGGAGAGGAGATGGAATTTTCCAAAGTTCCTGAGTTGACCTCTTCAGTGCCAGGCATTGGCATTGTGGAGATGAACTAGGCAGGTACTCTCCCTCAAGTACTTCCCAGCCCAGAAGGGGACAGGACCACACCTGAGGACTATCCTAAAGATCTGAACAGTGGAGACAGAATGAAGAGAGCTTGCTTGGACAGCTTTATGTAGCAGAGCTGGTACAAGTGACTTAGGCCTTGAAGGGACTCCTGAGCATCATTCAAGGAATTCTCTGGTCTCTAAACCCAAGTCTAAAGGCAGCTGATTTATCTGATTTATCCCTGGGAGCCACACCCAGCACAGGGCCAAGCACAAACACAACATCACATGAACGAGGACAGTGAGTCACTTGGGATATGGAGAGACGC…	RRGDGIFQSS*VDLFSARHWHCGDELGRYSPSSTSQPRRGQDHT*GLS*RSEQWRQNEESLLGQLYVAELVQVT*ALKGLLSIIQGILWSLNPSLKAADLSDLSLGATPSTGPSTNTTSHERGQ*VTWDMERRKRIRSLRPPSGTQQV*GQPEPHTLLTKKG*SQCSHSILK*AAKHTQECVL*PHTRRP*HSV*SHHEA*SIPKGGNRITVVSTHHGDPLTHSLAHSLTV*PWEATELI*SLSHKMD*WLHLPRELGRRVKINMY*MLLII*SYYM*RTC	5.40187	701038	error	11	3.66667
EMBOSS_070_1	1	EMBOSS_070	ENSMUSG00000092341	ENSMUST00000172812	Medium	[I].GKPFFQMYFR.[L]	GKPFFQMYFR	CAGGCATTCAGGCAGCGAGAGCAGAGCAGCGTAGAGCAGCACAGCTGAGCTCGTGAGGCAGGAGACTCAGCCCGAGGAAATCGCAGATAAGTTTTTAATTAAAAAGATTGAGCAGTAAAAAGAATTAGAACTCTAAACTTAAGCTAATAGAGTAGCTTATCGAAATATTACTTAGTCTTAATAATCTAAGAAGATCTTAAGAGATAACATGAAGGCTTATTTAAACAGTTTGAAAAAGGAAATGAGGAGAAAAGTATTTGTACTGTATAATGGAGGCTGACCAGAGCAGTTTAGGAGATTGTAAAGGGAGGTTTTGTGAAGTTCTAAAAGGTTCTAGTTTGAAGGTCGGCCTTGTAGATTAAAACGAAGGTTACCTAAATAGAATCTAAGTGGCATTTA…	QAFRQREQSSVEQHS*AREAGDSARGNRR*VFN*KD*AVKRIRTLNLS**SSLSKYYLVLII*EDLKR*HEGLFKQFEKGNEEKSICTV*WRLTRAV*EIVKGGFVKF*KVLV*RSAL*IKTKVT*IESKWHLKQ*SCRE*FENEV*F*KIEKSRLS*RPL*KSFDWRMYV*RHELETGKMEVLG*PGDGGARL*S*HLGGRGRRISEFEASLVYRVSSRTARATQRNPVLKKQKG*ASIWRKKIRKWK*KTKKTYRKVKKKLLEKIGK*KTKHL*KTEKVLKGTGSRKPKNRR*KEAR*KNKMEVKTTLDASIQDRQRR*D*GQKVG*DIKSEGNYL*SHKFKFLMERAV*KSL*TATYKIEASNQSY*D*SKKLRQNAFEELEEY*KP*LVA*FCLM…	45.2814	2340043	error	209	69.6667
EMBOSS_159_2	2	EMBOSS_159	ENSMUSG00000098318	ENSMUST00000184504	Medium	[C].LGKVDLGRAGAGGCSQR.[C]	LGKVDLGRAGAGGCSQR	GGGTAGAGATGTAGCATCAAACATTCACGGATGTCCAGGGAGCACGGGCACACAGGCTGCTGGCCAGAGGTACTAGGAAGGTACAGGCGGGAGTTCGACGAGGACGCACCTTCCCCTGTCTTGGAAAGACTATTATGAGCACAATACACTAGTCATGTCGGAGATAACAGCCTGACCTCAGCGTGGCTGCAAAATGAAGCCACTTTTGGCTTTCCTAAGCCATCAGGAGGCTGCTCACAGCGCTGCTGGACTCTTTAAGCCCTGAGGTCATGTGAAAAGAAGTTTGCCCTGTGTCCTTCTGTCTCCTGTTGGCTGTCCACAAAATGGAGAAGGCGGAAGCAACCTGAGGCGTCCTCTTTGTCTGTAAAGATAGAGAGTCCATTGTGGAAGGGGGAGATA…	FTDVQGARAHRLLARGTRKVQAGVRRGRTFPCLGKVDLGRAGAGGCSQRCWTL*ALRSCEKKFALCPSVSCWLSTKWRRRKQPEASSLSVKIESPLWKGEIQELYRRGSTGLHLLSPEFFYRKEKNKLLSGLSHYCFWALLLAAKCKS*LIEKSLTEFELVNGCCLFSGSAVVDLWEWSIL	4.50313	602305	33	9	3.33333
EMBOSS_139_3	3	EMBOSS_139	ENSMUSG00000097818	ENSMUST00000180851	Medium	[R].NRALSLEELL.[Q]	NRALSLEELL	ACAGAGGCAAGCAGAGGTGACTTGGGGAGGTCCACCTCCTGTCAGGGTGCTATGCCTGCATGGGCCAGTAGGTTCTTCCAGACCTAAGTACACAGAGAGAGAGCTGTGTAACTCTCAGGGAAGCTCCTTCCTCACTGTCTGAGAGTTTCCTATTCTGGCTATGAGCATTCCCTACGCCCCTCACCACACAGGATCTGCAGAGACACAAAAGGACCAGGTATTTTCAGCACCTGTGGCCACACACCAACTCAGGTGGAACCACCCTGACCCCTGACGTGCGAGGGCTACGCAGCAGGGTCGGAAAGACAGCCAGTTGAATGGACCGAGAGCGCAAGTGACCCCGAGGCCTCCCCCCGGAGCTGTCTCCGGGCCCAGGGAGGTATCAGGCATTGGAACTGC…	RGKQR*LGEVHLLSGCYACMGQ*VLPDLSTQRESCVTLREAPSSLSESFLFWL*AFPTPLTTQDLQRHKRTRYFQHLWPHTNSGGTTLTPDVRGLRSRVGKTAS*MDRERK*PRGLPPELSPGPGRYQALELHHGEPRPSRAWGDQP*SVLRAKHISLAPLTLHGSLGPAGEVVA*PEADSDHTPRAQLSSAGPRQQSLNAWKQTPADAEKLSPPTCTLRHRVGRTALMRVCHGVCQPRRRNSHVLFGCLFFFLPVGGSGAPAYLGSF*QVLRCGRNRALS*LE*ELLQSHPSPRPSVGFPPASLHTRVASFTFKGIRDRICIHNRECGAIKRPLSLAIFSDVFLEATRLSAPNCSETLDVCP*FICLNISQVVFSPPNQDSASSCPRDGIYTLGCRTL…	2.82267	1.78975e+06	error	52	18
EMBOSS_036_2	2	EMBOSS_036	ENSMUSG00000048106	ENSMUST00000059704	Medium	[G].GEVAAPPSAQRAGAR.[I]	GEVAAPPSAQRAGAR	GTCCAGAGGTCCGTCTGTGGTTTGGGGGTATTTGGGTGCCCCTGGAATGAAGTACGTTCTGAAGTATGCTGCACCGAAGTGAGGGGACCGGGAGTCATGGAGGGCCAGAGCGCAGAGATGCTGCAGGCCAGGTGGAGGCGGAGAAGTTGCAGCGCCTCCCAGTGCACAAAGAGCTGGAGCAAGAATTCGACCTTGGCACCCTACCGGCTCCGGACCGCACTCCCGGACAGGCCGAGCTGCCGGCCTTGGCGCGGGACAGCACGCAGCTGCTCATCACCGTGCTGCTGCCGACCGTGCGCTGGGGGAGGCGGTGGTAGCGCGCTTGCCGGTGCCCTCCACTCGCTTGCCCCGCGGGAAGCTGCTATCCGTGCCGCGGCTGCTCACCCGCTGGCAGCAGTT…	SRGPSVVWGYLGAPGMKYVLKYAAPK*GDRESWRARAQRCCRPGGGGEVAAPPSAQRAGARIRPWHPTGSGPHSRTGRAAGLGAGQHAAAHHRAAADRALGEAVVARLPVPSTRLPRGKLLSVPRLLTRWQQFARHQSIHPRRPLSCGTR*VASDGADWTASSPGTTVWNG**MCLGAPDPMEADLGQEGTRGQERAKTTADPSAQDVDAQLSRPAPNETPE*GGAGLRPASGQ*LHRCSGTLPGAPL*GEDAPRAPEEEEVLVPL*GLCDRENDQLELLKVKNSKKPHQDVRGRINKQMREEENEPERRRERGSSKDL*VRAGAGEMA*QLRALTSLPEVLSSIPSNHMVAK**IINL	1.89255	3.94835e+06	47	47	16
EMBOSS_144_1	1	EMBOSS_144	ENSMUSG00000097578	ENSMUST00000181384	Medium	[K].QHCQVGHRRCQKPEN.[L]	QHCQVGHRRCQKPEN	AAAAAGAGGGACTGAGATGTAGCTCAGTTAGTAGAATGCTTAATAGCATGCATGAAACCCTGGGTTTAATCCCAAACATTATATAAATTAGTCATGGTGGTACACCCTGTAATCCAGGCACTTGGGAAACAGAGGAAGGGGAACAGAAGTTTACAGTAACCCTCAATCTATAAAGTAATATTTGAGATCAGACTGGGTAAAATTAGATCCTGTCTCAAAAAAGTAAACAAGTAAAGAGTTGAAAGAAGAGCAATTTCATGGCTACATCATTGTGAAGATTACACAAGATGATACAGGTAAGACACTTAAAAAGTGTTTGGGCCTGCCAAGCATGGTAGGACTGGGACCAGTCATTATTGTTATTAGTTTAAATATTTTAAACAGCACCCTTTCCATAAG…	KKRD*DVAQLVECLIACMKPWV*SQTLYKLVMVVHPVIQALGKQRKGNRSLQ*PSIYKVIFEIRLGKIRSCLKKVNK*RVERRAISWLHHCEDYTR*YR*DT*KVFGPAKHGRTGTSHYCY*FKYFKQHPFHKEKERGGMQSQTAVSTNSGSLTSVSLSLKQGNYSSYSLWLP*GLDEKFPYKLNTELGMVVHALNPSTCGAEVGRSLLALGQSGLYSKFQNS*GYRERPCLQINK*INQY*MQWHTRNTQHIYHVH*VKSYSQRFKYYLPAQNCMFSLTSPVSHLSVRYILPNGPWAS*KFPTSLSRRKTLLALSNM*PFPHIYHCLNPASPFN*TMLLPSHFTSTEKSGTLSELSHSLIPLFNCYLRL*EASTAFPPKYLPKLTTEV*TTTPPPIQI…	0.862102	2.34209e+06	error	17	5.66667
EMBOSS_124_3	3	EMBOSS_124	ENSMUSG00000097526	ENSMUST00000180407	Medium	[G].FTEQLKAR.[V]	FTEQLKAR	AACTGGATGAGAAAAATGTCAGGGACGCAAGACACCCACCTGGGTTCTAGTGACAGCATCAAAGACAAAGAAATGACACTCCAGGAAAGAAGCTTAACTAATGGCTCTTGTCCTAGCTGACACCCCTAGAGGTTGTGTCCTTCTTAGGCAAGAGGATCGAACCAGGCCTATGAAGACCCCAAAGCCTGAGAATCCTGGCTCCTGACGACCTCCAGGCCACTGTGTCTTCGGGTCTGGACTGCAGAAGGGTTCTGTTCTACTCTCGGAACTCGAAGATCCTGGCCTCACCGTCCCTTCCCTAGCCCGAGCTCGGGGTGTGCAGAGACCCGCGAAAACCCGGCAGGTCTCCGGCGCGCTCGCCCGGGAGCAGGATCAGAACGCGCGTGCGCGCCGGGAGCC…	LDEKNVRDARHPPGF**QHQRQRNDTPGKKLN*WLLS*LTPLEVVSFLGKRIEPGL*RPQSLRILAPDDLQATVSSGLDCRRVLFYSRNSKILASPSLP*PELGVCRDPRKPGRSPARSPGSRIRTRVRAGSPAPALQPRGGKVAAHCSAARRPAVPPPQGRPLSVLGPPDTLTRSPRVL*SLAEPEALRCGVAAFPATRLRATSLRLRGRGRGGAGRGGAGRAT*L*TREGGLDKEGKPKRTVLCESGICVKVKNQNAMGFLLNYNKNQDRIKGEFTDVLPLPVQWTIPKS*MAS*KRCVLFGRKWRV*CLGWSFGLSVFLQAYVLKLARYIQEAQNRKI*NKYSLFVQGHLRPC*DDAVLRTNTR*GSKRKKKNHL*IKRLD*GDRYLGHEGELAER…	0.855458	6.23271e+07	514	7	3
EMBOSS_240_3	3	EMBOSS_240	ENSMUSG00000097928	ENSMUST00000181702	Medium	[T].FPGGATAQPARSER.[Q]	FPGGATAQPARSER	GCACTCAATCAGGGCGATCCTAGGCTCGCACGGCGGCTGTCCACCGTTTCCCTCCGCCCACCGCGCCGACGCCCGGGCGCCCACGCCACCCTTTCCCCGACCACCCTCTGCGCAGCCCGGGCCCAAGCGGCGGGACGCAGGCTCTCGGACCCGGAGCCGGTTCCCGCTTCTCTCGCTAGAGGGCAGACGGGGCCCGCTCAAAGCCCTCAGACCGAAGGGCACGCGCAGCCGGTAGAGATCCCGCAATCGGAGCCGCACTCCGGGGCTGGGCTCCGCGACCAACGTGGGGTCCGAGATCAGAGCCCGGGAGCGCGACGCACGGCAGACCCAGAGGACCCGGGAGGAACGGCCAGCAATCTCGGGGTGCGCACAGCGCACGGGCACCAGGTGGAGGCGGCG…	TQSGRS*ARTAAVHRFPPPTAPTPGRPRHPFPDHPLRSPGPSGGTQALGPGAGSRFSR*RADGARSKPSDRRARAAGRDPAIGAALRGWAPRPTWGPRSEPGSATHGRPRGPGRNGQQSRGAHSARAPGGGGAGTAVRGPGWAPRELREDTRDAARCPPGSSGAAGTHLGSGRLRRARASRGIPGPSSCPSPCLCLLCAQTSR*R*ALYADPAGRR*RATSLVQGLAEKFVPGGKSQWPGCAGASPVACRERRGLDHLERPLRLGVSRGYSCVPGPAAAGSGVASLRWLSRSLTARRGKGAHSPVYARISRQLPPLRCVPLLLPARPGVPTSFGEVLAGSFSIARKLDAGASFAPSPSPRPLPLSPPHPHPEAQTRHREEPELGDHGSAPFFWQLGQPR…	1.41752	1.51055e+06	905	617	206.333
EMBOSS_082_2	2	EMBOSS_082	ENSMUSG00000097658	ENSMUST00000180595	Medium	[S].HTRQIFHR.[T]	HTRQIFHR	ACAGTAGGTCCATCCTGTCCCTCTCAGGAGACTTCGGACACTCGCGTCACTAGCTGTTGCTCCCACCACAGCAGCTGGGAGTGAATCGGGGTGAGCAGGCTTTGCCCGGATCCCAGAACTCTAGTCCGCTTTGCCTCTGTCAGGCGGACGGTGAAGTGTGTCCGCTCTTTCTGTTTGGGGACGTCTTCCTCCTCGGCCGCCTTAGGGTGTGGAAACAAAGATGAGCCACACCAGGCAGATCTTTCACAGGACCTCTCCCCGGAACAAGACATACTCTGTGCCTCCCTTTGCCATCCTCTACGGCGGTGTCCCTGTGTGCTTTTGGAATTTGTGAGACAGAGTCTACTCTGTGTAGCCCTGGATATCCTGGAACTTGTCCTGTAGACCAGGCTGGCCTCA…	Q*VHPVPLRRLRTLASLAVAPTTAAGSESG*AGFARIPEL*SALPLSGGR*SVSALSVWGRLPPRPP*GVETKMSHTRQIFHRTSPRNKTYSVPPFAILYGGVPVCFWNL*DRVYSV*PWISWNLSCRPGWPQLRSACFCLQSAGIKGVHRYCPAHFTSLKDCN*WGWVDVCLASLRI*SGSLEPMKKK*GTVACACDPALTRNTTGPKGPLATQPSLINKFQAEGKNVSKNEDVCHHCLASPTQNLNIPWRAGEMAQRLKAPTALPKVVSSNPSNHMVAYNHP**DLTPSSGNV*RQLQCTYI**INKSX	0.968146	3.27861e+06	76	221	74
EMBOSS_319_1	1	EMBOSS_319	ENSMUSG00000115092	ENSMUST00000227784	Medium	[A].QSQVNVASLELACWLPQMHHGR.[S]	QSQVNVASLELACWLPQMHHGR	GGTTCATCTATGAAGCAGCTGGCTCCAGAACCTTCTGCCTGCCTAAGGCCGAATAATGCTCTGCTTCTGAGTATGCTGACTTGGGTTGTCTGTTTACCTCACTGCTGGCTGCTGGCTGCTGTCCCCCTGGGAGCTCCCTGCTTGGCTGCTGTGGCTAATGCTGCCAGGAGGAGCAGCGCTGTTTTCTGTGGACCCTTGTCTAGTTGTGGCGGTTGCTGGGAAAGATGAAGTCCCCAGACTGGAGCTCAGGCTGCAAAGAGGCTGGCATGAAGCGAGATGCCCCTTCTAGGCCAAGGCAAGATCTGCTGCCCTCTGACTTCTACCTGTTGCTGAGATGACTTCTGTCGCCAAGGCACCTGGATACCGAGCCACTCCTTGACAAAAGCCCTCTCCAGCCTG…	PEPSACLRPNNALLLSMLTWVVCLPHCWLLAAVPLGAPCLAAVANAARRSVVQESLSSGPSSSSSGATSRSRRRTLGAVSTLLTDPVHHGSNDSRFPSLLCFLASTGPATTSPIWMLCKEEEWTLARTQLPPRGAWRDRFCKCLSAQSQV*NVASLELACWLPQMHHGRSSACSETVSSQEGISLLVWTRSCVCLCARARVCACARARAETKAVRDPTKTTHRFLG*AI*CAGNSIWHTGVVMAVGFITEAKTRGGGGRRRGAARGRE*FWF*SLLNLTKG*A*RMCLAAGTGRALRHHAEGAAVWLSPPTRSPSSAPCCPHTSSGPHPRLGVGWRGKRGFFADMYD*VTEKGP*PSKACNDTTLCLLLNTPDLEVTPAGLIYDMLM*LFQTPFFCLLS…	2.46079	1.27174e+06	error	10	3.33333
EMBOSS_258_1	1	EMBOSS_258	ENSMUSG00000109754	ENSMUST00000210912	Medium	[D].KLINNLK.[S]	KLINNLK	AGTGTATTAAAGAAGCAAACACAGTGGAGGGCCAGCCAGCATAGCTATGGTAGCTCCAGAACAAAAAGCCCAGAGGAAATCAGAGCCTCTTTGTGAACAGCTTCCGTCTCTAGTATATTGAAGGAAAGTGACTGACATGCTGTGGACATCCCACCTGGGCTTACCTGAGCCGTTTTTCAGATATCCATTTGCATCTACTGTTGTGTACATGATATAAGGTCCAGGCTGATTTACTCCAAAAGGCTGCAGGAAGAAAGGAAATAGTTGGCCTTGAGAAAGTTGCCTTCAGTGAATGCTTATCAACTATACACAGTTGTTCAAAAGTGTGGGCCAGAAAGATTGTAAGAGTCAGTGGGAATGGAAGACACTAAGGAAACGAGGCCTTCTAAACACAACAGG…	SVLKKQTQWRASQHSYGSSRTKSPEEIRASL*TASVSSILKESD*HAVDIPPGLT*AVFQISICIYCCVHDIRSRLIYSKRLQEERK*LALRKLPSVNAYQLYTVVQKCGPERL*ESVGMEDTKETRPSKHNRTDTHLTTETVAACRDLRTVGPYGMNLLDLQNRASGI*ENESIKKPWDEFTDYTRNYKLTPLTPPGRDCTRLSTVSHK*L*EDILQVSAMQFTPYLPDVFFNIARASG*PSML*SPM*SVSGIGIVVGCSSCTNGTKPQSVPLLLKS*STGTH*G*RKKKKKSIYNHFREIVTICKRNDPSKVLKTVIILFHFHRMAGMIIYSDVRVRPWEDWSSIGFVLSIFA*TAHRATGSSHIHATVGMNKLCPHLTGIAQTRGIYYDTKIDGS…	1.53067	7.98608e+06	error	47	15.6667
EMBOSS_006_3	3	EMBOSS_006	ENSMUSG00000021268	ENSMUST00000143272	Medium	[N].IEIKEQK.[G]	IEIKEQK	GACTTTTGGTAAATCACCTTTTGCCGTTTCCTTTGTCCCCGTGAAGCCCCCCCTGGCCGCCCCCTCCTCATTCTGGGCTGGCTGGCTGAGGGGGGGGGCAGCCTGAGGGCTGCGACGTGGCAGGTTTCTAGAATGTTCTATTGATGGCCGCAAGAGGGCGCTGGTGGCACTGCGGAATTTTGGGGGGCGGGGTGGGGAGGGAAGAGGAGGTGGCCTTTGTTCTCCTGCAGGAGGGGGTCGGGAGCGAGATGGGTTGCGGGACCATGGGTTCATTTACCTATGGGGAAATGTTAGTAGATACCTGGATTCACTAAGGTGCGCTTGCAGGACTTACAATAGGTCAGAGATGGCGTCATCTGCAGTGGCTGTGTGATTTAGGGTGTCATGGACGCAGATTAA…	LLVNHLLPFPLSP*SPPWPPPPHSGLAG*GGGQPEGCDVAGF*NVLLMAARGRWWHCGILGGGVGREEEVAFVLLQEGVGSEMGCGTMGSFTYGEMLVDTWIH*GALAGLTIGQRWRHLQWLCDLGCHGRRLIYFQ*FVFSGVLERCGFLRKNCKKY*LIRRHP*GS*ELTWQRGGKVLRRRVLIGWGEAGWSAFILSYS*RPQK*VFCIKN*VFKF*LCLIGFTNGGWGQRPAFTYQE*NCGLGAAPYCRVSLVQGGSWMPVCVLRHVWKMAQAEAMGVHSDP*RWLMWALPPPPKPETCWAPSPLLRQSSSSSCVLAPVGVPQVVGLLES**VRAARPLAVSMCKWFLACQTSARVAHAHTANTCDLSINSSVPLPLLSSPPISPPTSPPISTFPLP…	6.90162	2265189	error	133	45
EMBOSS_065_2	2	EMBOSS_065	ENSMUSG00000097636	ENSMUST00000180489	Medium	[Q].NTVFQSRLWTER.[S]	NTVFQSRLWTER	GACTTTCTCATGCTCTCTTCCCACAAGCCAACAGTTCCAAAGCCGTGAGATTTCTGCTTCTGCCAACCTAGAGCTGAACGGTGCACCATCTCAGTGACAGCTTCCTTGCAGGCTGACCTACTTTGACCAATGACTTTCAGGATTGTCCTCCTCCAAGCCAACTGCCACATGTGAACGCTAGCCTGCTGGAAAGGGCACACGGAGAATAGTGGTGTCATGAGTGATAGCCCCAACCAGTGACCAGTTGAGTGATGGAAGCCACCTTCCACAGGCAAGCCAATGAACCAAAAATTTGATTCTGCTCCTAGAATTGCCAGGAACACGTCACCTCCTTAGCAGGTGCTCGGAACATATTTGGAAGATGAGTCCCCTCGTATCAGTGCACATTCCTCAGCAAAA…	TFSCSLPTSQQFQSREISASANLELNGAPSQ*QLPCRLTYFDQ*LSGLSSSKPTATCER*PAGKGTRRIVVS*VIAPTSDQLSDGSHLPQASQ*TKNLILLLELPGTRHLLSRCSEHIWKMSPLVSVHIPQQKVTGCKTSKKKKKQENGVCASESHPLCQARRRKPSHLNLLTTGWELHNLGTVPHACALALSELRKEDQKVQGHSRPYLRFAASLGDPDLG**RTVDMNCRIAVRNS*HPELCTENAVVRELSGREEHGTKVGMGEALCAHRTCPFMGCGSGSATV*LLS*CVYAKGQGPCIRSGWAGLVWCAVFPVGMAVIHYPSQPAQLLSGFNL**TSQKMPSG*ERDGGGGGGGELPR*PSVSCQPQIFLETTHWIHRAQNLSHQWQKTLLHPI…	1.47363	3271139	error	10	3.66667
EMBOSS_107_3	3	EMBOSS_107	ENSMUSG00000097378	ENSMUST00000180529	Medium	[R].WTDPMDICLRGFEPHSWALLQGSPISRSEATV.[S]	WTDPMDICLRGFEPHSWALLQGSPISRSEATV	AGCCGCGCGCGCACAGGTGCCGGGCCCCGGGAACCTATTCGATTTAGAAGAAACACACTGATGGTTGCCCTGCGGACCCGTGCCTACACCGCCCGAGGGACCCCTCCCACCTCCGCTCCGGAGCCCAGAAGTTAGCTGTGGAGTTTGTTTGTCGCGCCCGCGCACCTACAGTGAGCAAGGAGAGCCGGCGCCCGCCGGCCCAGAGCTCTGTCCCGCTCTCTGCTCCTGCAGTTCCTTCGCTGCCGCCGAGATCTCGGGGCGACAGTGAGCGGCGGCGGCGGCGGCGGCGCGAAACCCCGGCGGCAGTCTCCGAGTCTCTGTAGCCGGGTCGGGAAAGCGCCGCGCAGCCTGCGCAGAAGCATCCTCGAGTAACTGGGGAAAATGAGGACGGTATTGTGA…	PRAHRCRAPGTYSI*KKHTDGCPADPCLHRPRDPSHLRSGAQKLAVEFVCRARAPTVSKESRRPPAQSSVPLSAPAVPSLPPRSRGDSERRRRRRRETPAAVSESL*PGRESAAQPAQKHPRVTGENEDGIVSFVGTAKRREHACTRMAEWLRRWT*DPMDICLRGFEPHSWALLQGSPISRSEATVSPGTDLSQAGRGSPERSIQLSGVVEKYFSKNSELCGK*YQHI*IVTPTGKLEAGEMAQQLRALTTLPKVLSSNSSNHMVAHNHP*RDLTPSSGESEDSYSVLMYNNK*ILKKKISFQKQEFWRKTWIAFF*CLLNFLFHLTVFKCLVFQWQHLQRQNCG*FLK*CLGGFVVVVF*SNVLKSHL	2.69143	5.68875e+06	error	61	21
EMBOSS_291_2	2	EMBOSS_291	ENSMUSG00000115871	ENSMUST00000231018	Medium	[K].VNKAISDGQLL.[K]	VNKAISDGQLL	TTTCTGTTTCCAAGATGCCTTTCCAGACTAGAACCCAGACATGTGAGCCACTGGCCAGACACAACATCTGGTGCCCACATGGGACTGAGAAATGGCAGAGGACATTTGGAAAAACACTGCTGTTTTGGAGTTCCATAGAAGAAGAGAATAATTAAAGGAAGTTCATACCAGAGAAGGTTTCCAAGATGCCTTTCCAGACTAGAACCCAGACATGTGAGCCACTGGCCAGACACAACAGTGCTGGAGGAGCTGAGAATTCTTATTGACCTGAAGGCTGCTAGAAGAAGACCGGCAGCTAGGAGGAGAGTTTCAAATCCCACCAATGTTGACACACTTCCTCAAACAAGGCTCCATCTACTCCAACAAGACCGCATACCTGCTAATATTGCTACTCTCTGG…	FCFQDAFPD*NPDM*ATGQTQHLVPTWD*EMAEDIWKNTAVLEFHRRRE*LKEVHTREGFQDAFPD*NPDM*ATGQTQQCWRS*EFLLT*RLLEEDRQLGGEFQIPPMLTHFLKQGSIYSNKTAYLLILLLSGPNFFKPPQGHSGIMVDDFVVSSQLIL*PEDKPCRSSLMANSYFWLLANHMKVLWRETLGQTNTEKGMEQLQMIL*G*IAEIRAFSASHLCSRRSECHLGRLATVQDLEDSAWILPV*TPEHQRHQGSNQPSHPGEMSEATP*WSLSLSSW*LAIYPVVKIRQNLGLFPISPHPAFQLREH*RDSFLLLFIPSIYSFSAQESTL*FQYIELGDTGSVRTLQGTEG*LWFLEYVSYPKCLDFLNLKILCIFMESMEKMEAPMQIHKPE…	0.986698	1.78975e+06	error	15	5.33333
EMBOSS_220_1	1	EMBOSS_220	ENSMUSG00000098001	ENSMUST00000182891	Medium	[K].WCHGLLCKIMGFISTFLCTR.[S]	WCHGLLCKIMGFISTFLCTR	AGTGGTTCTTTAGACATGGAATGGGACGGATGAAAGCTGTAACCCACGTTCCCATGGCCACTTCCCAGTGGCCTTCTCTGCTTCTAGAGTCTGAAATAGAGCTGGCAGCTCGGCTTCCCATGAAGTGAGTGAGAGGCAAGGGATGGAATGCAGTTGGTAAGATACACCAAGTCCTCGCTAAATCCTTAACAGCTCATATAGGGTGTGCTGGTACCTGCTTATCATCCCAACCCTGGGGCTGAAGAGGTAGGAGAAGCAAAAGGTTATCCTTAGTTACACAGTAAGTTTGAAGTCAGCCTGGGCTACGTGAGATCCTGTCTCAGGGCAGACATGGAGGTGAGTACTAACAGAGGAAAGGGAAGAACAGAGGAGCAGGAATGGAGGAGGAGGGGAAAGGAA…	SGSLDMEWDG*KL*PTFPWPLPSGLLCF*SLK*SWQLGFP*SE*EARDGMQLVRYTKSSLNP*QLI*GVLVPAYHPNPGAEEVGEAKGYP*LHSKFEVSLGYVRSCLRADMEVSTNRGKGRTEEQEWRRRGKEGGRGGEEGRRKKRRKKKG*ELKTGEHC*RPAQLPSLVPIAL*LRASPQGRNTKEESEADLGSTRSTLLALGWCRAGPALVLCLPTPSTFSSLWISQQCFWSFVVCNTTLLNIPVSKFIPSQFHTHNGHEHAMPETETNTKMSRYTE*R*IYKVQQFQ*QQFAM*SAYLGSLAEANVESFIRI*IINILFCLVYKTGSVHAALGILELTM*TRLALTDY*FLTLTAHSTQQICLFISLLIIMRCLQNECR*KGLYRVEKVSGVGGV*…	1.92346	2.70508e+06	error	16	5.33333
EMBOSS_118_3	3	EMBOSS_118	ENSMUSG00000087595	ENSMUST00000155199	Medium	[A].GLQGEIQNAR.[L]	GLQGEIQNAR	ACGCGGACACCCAGGTACTGTAGGCAGAAGAGCGCGGCCAGCGCGCCCCAAAGGGCCGCTGTGAAGAGGCTGCAGCTGAAGTAGAGCAGGAAGCGTATAAAGCCATAGAGCCAGCGGGTCTTGACATAAACATCGAAGTTGTTGTACTTGGTGCGAGCCAGGTGAGAGGTTCTCAGCGGTCCGCAGGCTGCGTGCAGGCAGGTGGTGTGCGGGCCGTGGAAGGAGCGCACCCGCCGCGGGATGGGCATGACCGGCATTGGGCCTGGGCGGCAGTGCTGTTTTGCAGTGGCGGTGCAGTGTCCGGATGGCCAGCATAGGTGTCATCAGCGTCTAGGAGCCCTCAGCTGAGCCTTGGGGGAGGTGCTGGCCTGCAGGGAGAAATACAGAATGCCAGGTTAC…	ADTQVL*AEERGQRAPKGRCEEAAAEVEQEAYKAIEPAGLDINIEVVVLGASQVRGSQRSAGCVQAGGVRAVEGAHPPRDGHDRHWAWAAVLFCSGGAVSGWPA*VSSASRSPQLSLGGGAGLQGEIQNARLPSHLPLILLRKLRHQDLFPGAACTQQKHYWLI*AGHSVRVLQTGTQRGEMACGSLFHQA	1.52402	3.64202e+06	122	241	81
EMBOSS_180_1	1	EMBOSS_180	ENSMUSG00000097080	ENSMUST00000181757	Medium	[M].SWPAPSLQPRDR.[G]	SWPAPSLQPRDR	AAATCCCAACGGCTCCGGACGCCTGAATGGAGCCTCGCTCCCTCTGTCCCGCCCTTCCCAGATCTAAGCCCACCCACTGGCGCTATGGCGGCCTTCCCGCGGATCGCGGCGCACTGCAGGTATGAGTCCATCGCCTGCGGGACTTCGCCTTGCAGACGGCCCCTACCTCGCCCCAGGATCCCTGTCAGGCGCCACATGTCGTGGCCAGCACCATAGAGCCTGCAGCCGAGGGATCGAGGCCCAAAGGACGGGACAGGGACCAGAGTGGCCGCTGCGCTGTCCCCAGCGGCCGAGTCCCCAGCCAGCCAATCAGCAAGGAGCCCTGCCGGAAGGATGACGCTCTAGGAAGGAAGTGGCCATCGGATAGGGCGGGCTTGGCGCTGGCGAGCCAGAAAGAGG…	KSQRLRTPEWSLAPSVPPFPDLSPPTGAMAAFPRIAAHCRYESIACGTSPCRRPLPRPRIPVRRHMSWPAP*SLQPRDRGPKDGTGTRVAAALSPAAESPASQSARSPAGRMTL*EGSGHRIGRAWRWRARKRGKATPRIHSKRKTKRRRGSS*MLMFCFFDINLRTHMGVFIDSCSHLLNFLLFI*YCFLGKSCFEALEKHKPWQPLQPSSLLQALAAGGREMRWRPAEWVLGILQEGLALQACANVAILSSEPSRGRGRGRVRKGGREGQTG*LFFVLPAHPQHFIRPFRTNVHFAFDTMDSRKRLTVGIYINKIVHLTVQSVPFHLNSDPSVITDSNSGIRLNLDDFPEGILE*IYFLRAWGGGNFWDSIGNVIEENT**KKKSFGFP	4.0281	7.26893e+06	error	27	9
EMBOSS_227_1	1	EMBOSS_227	ENSMUSG00000097660	ENSMUST00000180864	Medium	[R].SEESIGATGIGVI.[D]	SEESIGATGIGVI	GGTTTTACGAGATAGGGTTTCTCTGTGTAGCCCTGGTGGCTGTCCTGGAACTCACTTTGTAGACCAGGCTGGCCTCAGAAATCCGCCTGCCTCTGCCTCCCAAGTGCTGGGATTAAAGGCGTGCACAACCACGCCTGGCTCTGCTTGTGGGTTTTCTAGTCTTATTTTATGTGCATCCATTTCTTTTCCATGTATGTATATGTACCACACGCATGCTGGTGCCCACAGAGGTCAGAAGAGAGCATTGGAGCCACTGGAATTGGAGTTATAGACAATTGTGATGCACTGTGTGGGTGCTGAGACTTGAACCTGGATCTTCTGCAAAAGCAGCCAACGTTGTTAACTAAGGAGGCCTGGTGCCAGGCACAGGAAAAAATATTTAGTTGCTCAGCTTCTCAC…	GFTR*GFSV*PWWLSWNSLCRPGWPQKSACLCLPSAGIKGVHNHAWLCLWVF*SYFMCIHFFSMYVYVPHACWCPQRSEESIGATGIGVIDNCDALCGC*DLNLDLLQKQPTLLTKEAWCQAQEKIFSCSASHSVSHTQIMREKHISNISSHSLSSCI*GFRTHATVVLYLETVPPQSPRLAS*VLGDRMCYHT*PITNSTVAGQYSHSY*QS**RRGGFLLVVISPLLCDILIHGFK*RSGQSNWDIHCFKQLPFLFIRASLSHARLPGPDL*LPHLSFPTAKTSSSNTCLTVLFTSERTSLRK*NSSLGSPLVSSVLLAFSLGVLI*DRVSPHSPGWPRTGKSSYFRLPVLGLQARSTTPKLCILN*KYLVSLEPANPRASFNGVSSCNSNGGGLAP…	29.1976	7.05962e+06	78	169	56.3333
EMBOSS_076_1	1	EMBOSS_076	ENSMUSG00000091514	ENSMUST00000167899	Medium	[E].KLQQQIR.[T]	KLQQQIR	AGACGTCGGGCGCCGGGCACGCGCCGGGCACGCGCTAGGGGCGTGGGGGACACGCACGGGAGGCCTTGCCTGCGCTGAGGCTTTGAAGGAGGAAAATCGGACCTTCTGACCCCTCATGGGTCCCGGCAACCCCGGTGGGCAGGACTGGGGTGACTGAAGGCTCTGTCTGTCTGTCTGTCCTCCATTCCCTCCCTCTATTTGGATTGAGAGGCTGTCAAAGTTATCCCTAAAGCCTAAGAGATCTGACAAGCAGCAGCCTACAGACACCTTGGCTTGCGTAAGGAGAGGTCTACTTGGCAATACTGACAACTCCAGTTTCCTATTCTGTTCAGTCATCTGAGAACCGGAAAGAATCTTGTCACTGCTGCTTTCATTCCTCTGCCGGCTTTTCCAGTTTTT…	RRRAPGTRRARARGVGDTHGRPCLR*GFEGGKSDLLTPHGSRQPRWAGLG*LKALSVCLSSIPSLYLD*EAVKVIPKA*EI*QAAAYRHLGLRKERSTWQY*QLQFPILFSHLRTGKNLVTAAFIPLPAFPVFSPFQVLGQEKVGMCCFLSQQAFQKMGTNQIKEFFGQISHRLPCIPSYFIVPFFLIFPVWPGSYKQLLSWPDGQSPGPQFQQNPVLKVPLSAFLPEANTLCLSFFLQTLLLLAQETAPSPAHV*SF*YLEECPHLKRNTLLGDYYSELGCWDARCWHYHITEAQHYTGLENPKGLSCHCSLLPEIHTDGRCRESCAGSGLDPMGCRSTRGP*NGKTERRQKLS*WEAINIRYVSVHRLPTRKELKRLPQNHQRPTLLDDKGRAL*SR…	5.85835	57231265	568	116	38.6667
EMBOSS_053_2	2	EMBOSS_053	ENSMUSG00000021268	ENSMUST00000129245	Medium	[R].GGVNWHFLFLFFI.[F]	GGVNWHFLFLFFI	GACTTTTGGTAAATCACCTTTTGCCGTTTCCTTTGTCCCCGTGAAGCCCCCCCTGGCCGCCCCCTCCTCATTCTGGGCTGGCTGGCTGAGGGGGGGGGCAGCCTGAGGGCTGCGACGTGGCAGGTTTCTAGAATGTTCTATTGATGGCCGCAAGAGGGCGCTGGTGGCACTGCGGAATTTTGGGGGGCGGGGTGGGGAGGGAAGAGGAGGTGGCCTTTGTTCTCCTGCAGGAGGGGGTCGGGAGCGAGATGGGTTGCGGGACCATGGGTTCATTTACCTATGGGGAAATGTTAGTAGATACCTGGATTCACTAAGGTGCGCTTGCAGGACTTACAATAGGTCAGAGATGGCGTCATCTGCAGTGGCTGTGTGATTTAGGGTGTCATGGACGCAGATTAA…	EDEELE*SSPRLCWPWLQLFQKPGAPTEESLTWLSLQG*HHRLTPVFQDHLLDAKAAARVPAVHLYLLSQGARIPGTHYHTEQLLVDPPGIRTARDKRQRGSSVAS*FLWGSNLEPVP**GGTGHGP*PLLCLCLESEPFPVHLCSCSSASELECCPPRGGSSLVTDHAVLTMS*AKGSLWEPLRRGTRVRGDQHLAGNSVGGVGWGASFWNEHVADPPRHVPSPSSTHLLGDVPFGVVGTLGATS*GCCEN*MNCSSLRQGWAETSAHVC*KVCRWI*SSRSWLMCLNHSLADSCSPYAQGSPCAR*GLFRQQDVRETLSKDTSVRSFPGHFLHNVTMLFLSFMCQRG*PSV*RGGVNWH*FLFLFFIFS*FLKR*VGKRTGRARTHS*D*T*IHTED…	6.90162	1.35379e+06	error	133	44.6667
EMBOSS_291_2	2	EMBOSS_291	ENSMUSG00000115871	ENSMUST00000231018	Medium	[N].KAISDGQLLK.[Q]	KAISDGQLLK	TTTCTGTTTCCAAGATGCCTTTCCAGACTAGAACCCAGACATGTGAGCCACTGGCCAGACACAACATCTGGTGCCCACATGGGACTGAGAAATGGCAGAGGACATTTGGAAAAACACTGCTGTTTTGGAGTTCCATAGAAGAAGAGAATAATTAAAGGAAGTTCATACCAGAGAAGGTTTCCAAGATGCCTTTCCAGACTAGAACCCAGACATGTGAGCCACTGGCCAGACACAACAGTGCTGGAGGAGCTGAGAATTCTTATTGACCTGAAGGCTGCTAGAAGAAGACCGGCAGCTAGGAGGAGAGTTTCAAATCCCACCAATGTTGACACACTTCCTCAAACAAGGCTCCATCTACTCCAACAAGACCGCATACCTGCTAATATTGCTACTCTCTGG…	FCFQDAFPD*NPDM*ATGQTQHLVPTWD*EMAEDIWKNTAVLEFHRRRE*LKEVHTREGFQDAFPD*NPDM*ATGQTQQCWRS*EFLLT*RLLEEDRQLGGEFQIPPMLTHFLKQGSIYSNKTAYLLILLLSGPNFFKPPQGHSGIMVDDFVVSSQLIL*PEDKPCRSSLMANSYFWLLANHMKVLWRETLGQTNTEKGMEQLQMIL*G*IAEIRAFSASHLCSRRSECHLGRLATVQDLEDSAWILPV*TPEHQRHQGSNQPSHPGEMSEATP*WSLSLSSW*LAIYPVVKIRQNLGLFPISPHPAFQLREH*RDSFLLLFIPSIYSFSAQESTL*FQYIELGDTGSVRTLQGTEG*LWFLEYVSYPKCLDFLNLKILCIFMESMEKMEAPMQIHKPE…	0.986698	4.17079e+06	error	15	5.33333
EMBOSS_084_1	1	EMBOSS_084	ENSMUSG00000078952	ENSMUST00000179324	Medium	[F].SLDPRAGSVDSK.[L]	SLDPRAGSVDSK	TTCATTTTCTAGCGATCACTTTCCTTCTGCTGGTGACACACTGTTACTTCAAAGGCCTGGACCGGGGCGTGTTTCCTGTAAGGGTGAGCAGATTTGAATGACCGCTCAGGATGGACCTGCTCTAAGCCTGACCAGACTTGGAACTGAAGCACCTTAAGGACAAAAGAAAGACTTGCTGAGCTCGCTCACAGACCTTCTAGAGCAGCGCTGGGCTCATGGATCTGGAGATTATGGACAGAAGATAATGTAGATGTTATAACCAGGCCAGCGTCCTGTGGTAAAGGGTGTCTTTAGATCACTGTTTCGTCGGTATAGGTAAATGACATGAAGAACATCTTTATAGGCAGGGGATGAGAATCTGAGATGAAGAAAAGAGGCTCCCCTGATGGACCATTCTAA…	GTSWLDGRR*EAGES*ALFGMETAESSSSEFKRERYGGQA*GAPQRPWGI*STRSLTRLGTEAP*GQKKDLLSSLTDLLEQRWAHGSGDYGQKIM*ML*PGQRPVVKGVFRSLFRRYR*MT*RTSL*AGDENLR*RKEAPLMDHSKLLSEAGSIELKDMIATIIRHWPLRSW*SFSILAFCCPFIKEPHF*LLLKI*NHLIVFSHY*EL*ITSKLSFSLIICISKYFS*VR*SLPLWFAVYQFSLDPRA*GSVDSK*LVFFYSRAFLLALTWEDNGEGPGPSCSLLGVTFPALLQGSMLKPPLAIIEWDSFLHFGDFNIVFVWVLSFSPKSVWCDRGNLYTKACQSATSSCCHWLDQQFTLDTEPCLHAC*CHHQHQYHCAPASASLCTSISITVYQHQ…	62.6287	5311727	error	98	32.6667
EMBOSS_137_1	1	EMBOSS_137	ENSMUSG00000098318	ENSMUST00000183867	Medium	[S].HIYPFRLPNKTLWLNISGQQCPATLLK.[N]	HIYPFRLPNKTLWLNISGQQCPATLLK	GGGTAGAGATGTAGCATCAAACATTCACGGATGTCCAGGGAGCACGGGCACACAGGCTGCTGGCCAGAGGTACTAGGAAGGTACAGGCGGGAGTTCGACGAGGACGCACCTTCCCCTGTCTTGGAAAGACTATTATGAGCACAATACACTAGTCATGTCGGAGATAACAGCCTGACCTCAGCGTGGCTGCAAAATGAAGCCACTTTTGGCTTTCCTAAGCCATCAGGAGGCTGCTCACAGCGCTGCTGGACTCTTTAAGCCCTGAGGTCATGTGAAAAGAAGTTTGCCCTGTGTCCTTCTGTCTCCTGTTGGCTGTCCACAAAATGGAGAAGGCGGAAGCAACCTGAGGCGTCCTCTTTGTCTGTAAAGATAGAGAGTCCATTGTGGAAGGGGGAGATA…	ASAVDRMQAGSFSLGRDVASNIHGCPGSTGTQAAGQRY*EGTGGSSTRTHLPLSWKGGCSQRCWTL*ALRSCEKKFALCPSVSCWLSTKWRRRKQPEASSLSVKIESPLWKGEIQELYRRGSTGLHLLSPEFFYRKEKNKLLSGLSHYCFWALLLAAKCKS*LIEKSLTEFELVNGCCLFSGSAVVDLWEWSILEGTRR*RWLGRWGQTVRIHLTRCHGLSFPPGHLC*STVIQWLFKRLLME*FEVRSCQLASKLGYLEDAYSLCLKKRAAGKEWSGKGYQHYRKVK*LPAGVSKERTLLHVIV**KYIKV**RYPLLSSNCK*CPRCTSFCSL*HEFIYYLFLIYYFHNNFIIVRLGKTVPFYVRRTFTVYMDYKNMNRLRF*LIL*SKYL*ARGRK…	4.50313	563794	error	9	3
EMBOSS_222_1	1	EMBOSS_222	ENSMUSG00000098234	ENSMUST00000182580	Medium	[K].INIFNINK.[L]	INIFNINK	TTTCTCGGCAGCGCCGTAGAGCGCGAGCAGACGGTGCAGCATGGCGCACAGCGGAGGCCGCGGGCGGCCGAACCCGGCGTGTCCTTGGGCGTTTCCAGGTGCAACAAAACCTGCTCATTTGAAGGTGCTTGAACAAATATTTTCTAAACACTTGTCATGGAGAGTGATTGAAACAAGCTGCCAGGACTACATTTGCCAATAACAAGCATGTAGGTGGCTGTAGTGGATGTCCAACTTTGGGAGCTGTGATGTCTAAAAACCCTTTATTGTTTTGGCTTACATATTGGAAGGTAAAATGAAGGCCATGAACAAAGTCAAGAAGCCATAAACAGAAGCAAATGGTGAAAATTAATATCTAATTTAATATTAATAAGTTATATATAAATAAACAGTTATTCT…	LSRQRRRARADGAAWRTAEAAGGRTRRVLGRFQVQQNLLI*RCLNKYFLNTCHGE*LKQAARTTFANNKHVGGCSGCPTLGAVMSKNPLLFWVQLTYWKVK*RP*TKSRSHKQKQMVKINI*FNINKLYINKQLFLIAVGSNFFKMSFS**NKLVFHX	4.40945	2.20462e+07	error	41	13.6667
EMBOSS_121_3	3	EMBOSS_121	ENSMUSG00000097197	ENSMUST00000180584	Medium	[D].QDGASLPCIVNSTWK.[D]	QDGASLPCIVNSTWK	GAGGGGCGCCAGGGGACGACTCGCAGGGAGGGCCTGCCACCCATGGATACAAAAGTCCGCGTTAATGACCATATGGCTGAATCCTGCTTGAATCCCTGGTGAGGAACTGGCTGGGAACTCTTTGATGACATCATCCCCAGCAAAAGCTTCCTTTATCATTTGCTTTTGGTCTCTTGCCCCTTCATCTTCCTGGGAAGAAATGAGAGCAAGAACTTTAACTTGTCTTCAAGAGTACTTCATGACAAGACAGAAACCTGGGTTATGACATCTTAGCGCCCCCTAGGGGGTAAACATCCTCAGCTCGTCATCATGACACAATTTGAAACTTTCAACAAGAAGTTTTAGGGTCACAGAAATGATGGCCGGTGTCAGTAACAAGAACTCCAAGGTCCTGGCCAG…	GAPGDDSQGGPATHGYKSPR**PYG*ILLESLVRNWLGTL**HHPQQKLPLSFAFGLLPLHLPGKK*EQEL*LVFKSTS*QDRNLGYDILAPPRG*TSSARHHDTI*NFQQEVLGSQK*WPVSVTRTPRSWPECGLAAA*IPKQTGCLVFLGTRFNYLIWSWGGVLSTGCWNLVKGALADQSLIFELLCLESNQSIQ*LPSPLKAGLESPQRTLVAQDLGSTCGSAVSTYLHLGPAWCHGHLYLLTPEKHSSKTNMY*LCCV*EGPVLFNCQLPHHKPKIWLLLTNSSTVVGSASDVTEGVLVVRRFCRLIICSFLFFPLE*FCGFLLTCSPSTEGLGRSLFGRLSSLPSSSSSSRVRILSGLCSKRGSSSSGAGSSSQTRSTAFAGLFFCFLDRWFSL…	6.16457	1.24136e+06	472	43	15
EMBOSS_146_3	3	EMBOSS_146	ENSMUSG00000097073	ENSMUST00000180982	Medium	[K].ILQQKCMVVLCFVFCA.[Y]	ILQQKCMVVLCFVFCA	GCTTTCTGGTTCCTTAGTCCCAGTTTGGGGACCATGGCTCATCATTCTTAACATCCTCGAAGCAGTTGCAAAAAGATAAAAAGATGAAGGGGAGCCCAAAGCTTCCGACAGAATTCATAACAGAAAATAACTTGATTAAAGCCTGACTCTTTTAAAAGTTCTTTCTCATAGCATGTCATGGTACCTCTTTCTGCAATGAAACCTGACCAGTGAGATGCCAGCCTGCCTGTGAAGATCCTGCAGCAGAAGTGCATGACCAGTGACACTAGACTTCTTGCAAATGAACACTAGATATGGTAACATCCAGAAAAGGCAGAGACAAGAAAATTCACAGTCTGAGTACTGGGGTGTTTGAGATGGGGTCTATCTACATGTCTCTAGCTGTCCCTATGTAGTGAA…	QPCSRSTETIKGPAGKAGPWLIILNILEAVAKR*KDEGEPKASDRIHNRK*LD*SLTLLKGMYEI*IYIFASIHFYCWCKENQLSGNVLLNSPGPTQQLLLLWPF*VGVAAVNVVNVQIDCTNSCETYRV*TVMDYIPKMMT*RQIQRLREDHCV*VKFKSCLLRSSFS*HVMVPLSAMKPDQ*DASLPVKILQQKCM*VVLCFVFC*AYCRWSSL**SYPEPEFLLKDHTYGSGF*DGPLQRTIVFFFNVGSNVMPVFCLFVCLFCFYILGPVTLDFLQMNTRYGNIQKRQRQENSQSEYWGV*DGVYLHVSSCPYVVNGTASGMTCRVDSCMFFCGLYVNGLFLTIHSTMFSAVTVMGSWVSW*QTHLYRLSRVNAILTIKQQVTIFVIVKLVMSHF…	2.9349	5.13667e+06	error	34	12
EMBOSS_390_1	1	EMBOSS_390	ENSMUSG00000103400	ENSMUST00000195518	Medium	[R].KINAAEGLR.[A]	KINAAEGLR	GGAAAGGCGTCCTACGGCCGGCTAGGCAGCCGCCCCCTTGGATGCTGTGGTTGTAAGGTGGGTGACCGACCGACTTCACTTGGGGTCTCTGTGCCTTCCGAACCCGCTTTCACAGCTCTTCTAGCTGGCCCCTGAGCAACGCGGGCCTCCGCCTCCGGGAAGCCCTCCGGGCCCCCCCACCCCGCCCCGGCGCGCCCCCCGCTCTACCGACTCCGGGGCGCCTAGGGCGCTGCTCCCGCCCCCACGCGGGTATCACCGGTGTCGGGACGCCCAGGAGAAAGTCCTCCAGCGCCTCGAGTCCCGGCGGAGCCCGCACGGGAGCCGTGGCGGCCGCGAGACGCCTACGGCCTCCGGGAGGTGAAGAGAGTCCAGGGACTACGGCAGCCCCGAGCTTGGGGC…	GKASYGRLGSRPLGCCGCKVGDRPTSLGVSVPSEPAFTALLAGP*ATRASASGKPSGPPHPAPARPPLYRLRGA*GAAPAPTRVSPVSGRPGESPPAPRVPAEPAREPWRPRDAYGLREVKRVQGLRQPRAWGTPTDRPGGWSPRLLLFHVVPQRLAQVLLGCLQLAHKGRHCSARLSARP*TARPTATSNRKINAAEGLRAGRWRLDSTRFHSARLGSVRLGSARFGSARLGSAPLGSARLRSARLGSALLGGPAPIR*GDVAWVWFLAPPSRSWESTQPNSLRQLPPLGSRDPLPLVGACPTYARLPARGGPRGANLTAPPALRPGPALTAGQLFPEGRAQVPECMQYLIYPLVLIFLPSAHHLL*HLVGRSRFLPPATKTRAA*RQDLCYSSSEHS…	2.42277	3.30199e+06	193	42	14
EMBOSS_227_3	3	EMBOSS_227	ENSMUSG00000097660	ENSMUST00000180864	Medium	[S].DLEMAPGQGKPTLTSHMREQPLSGASPECLQLSR.[S]	DLEMAPGQGKPTLTSHMREQPLSGASPECLQLSR	GGTTTTACGAGATAGGGTTTCTCTGTGTAGCCCTGGTGGCTGTCCTGGAACTCACTTTGTAGACCAGGCTGGCCTCAGAAATCCGCCTGCCTCTGCCTCCCAAGTGCTGGGATTAAAGGCGTGCACAACCACGCCTGGCTCTGCTTGTGGGTTTTCTAGTCTTATTTTATGTGCATCCATTTCTTTTCCATGTATGTATATGTACCACACGCATGCTGGTGCCCACAGAGGTCAGAAGAGAGCATTGGAGCCACTGGAATTGGAGTTATAGACAATTGTGATGCACTGTGTGGGTGCTGAGACTTGAACCTGGATCTTCTGCAAAAGCAGCCAACGTTGTTAACTAAGGAGGCCTGGTGCCAGGCACAGGAAAAAATATTTAGTTGCTCAGCTTCTCAC…	FYEIGFLCVALVAVLELTL*TRLASEIRLPLPPKCWD*RRAQPRLALLVGFLVLFYVHPFLFHVCICTTRMLVPTEVRREHWSHWNWSYRQL*CTVWVLRLEPGSSAKAANVVN*GGLVPGTGKNI*LLSFSLSLAHTNYERKTHF*YKFTQPFFLYMRF*DTRHCCFVFRNSATTVPQAGLLSAG*QDVLPHLTNN*QYSSRTIQPQLLTILIKEGRFSFGCYFSFTV*YFDTWI*ITIRSE*LGYPLFQTVTISLYKS*PVTCQAPWP*PLTPPPQLPHC*DQQQQHLPDCTLYF*EDQSQEVEFLTGIATG*QCFACLFIGCFDLRQGLPT*PRLAQDWQIFLLQAPCARITGTIHHTQAVHFELKIPGQSRASQSKSQL*RGVILQ*QWRGTSTA…	29.1976	391640	476	169	57
EMBOSS_164_1	1	EMBOSS_164	ENSMUSG00000097799	ENSMUST00000181963	Medium	[V].QEMVISRRK.[G]	QEMVISRRK	CTCAAGATGCTCTGAGTGAGCTTAAGAGAAAGCATTCTGCAGTCCTCTCTGTAGTACCCAGAATGCCTATGGGGGATTCCACAAGCTCAGTGAAAGGTAGTAACAACAGGTAGTTGAAAAAATTGACCACTAGCAGGGCGGTGGTGGCACATGCCTTTAATCTCAGGCAAAAGCAGGCCTTCTCTGAGTTCGAGGCCAGTCTGTTCTATAGACCAGACAGGGCTATATAGAGAAACCCCATCTTGAAAACCAAAAAGCAAGCAAGCAAACAAATCAAAAATTTTTACCATTGGTTCCAAACATTAAGATTCAGAGACAGCACATTCTAGTCCATCTGAACTAAAGTGACAGATTTCTGATGACGTATGTAATCCTAGGTCCAATTAGTGTTTCAGGTGC…	LKML*VSLRESILQSSL*YPECLWGIPQAQ*KVVTTGS*KN*PLAGRWWHMPLISGKSRPSLSSRPVCSIDQTGLYRETPS*KPKSKQANKSKIFTIGSKH*DSETAHSSPSELK*QISDDVCNPRSN*CFRCLHFNGILCQDRLSHVSYRNSQCLILN*SRHLQWVFLAQV*FKLNKNLVLIKANVW*PLKEAKDRYERHTPG*AFAQLLLFLGYLLNDLFPVDISP*CI*NLS*GWLKPRFLFCFILSMATNIANSSSAIEVWLWEMCSCFGLQTDVSA*ISLERGGKTKFT*FGKKRAWGLIIEIRFLKLCIQASVLKALSFKRSIRFNKVVVLRIF*RGLQV*Q*ARVWTGRC*HLYLSLFLENCGITWGGGEVLGCSWDLAPLFLIHGVSAAGH…	21.7733	9.29323e+06	error	7	2.33333
EMBOSS_078_3	3	EMBOSS_078	ENSMUSG00000092341	ENSMUST00000173314	Medium	[K].QTCHFQCGDWEALV.[L]	QTCHFQCGDWEALV	CAGGCATTCAGGCAGCGAGAGCAGAGCAGCGTAGAGCAGCACAGCTGAGCTCGTGAGGCAGGAGACTCAGCCCGAGGAAATCGCAGATAAGTTTTTAATTAAAAAGATTGAGCAGTAAAAAGAATTAGAACTCTAAACTTAAGCTAATAGAGTAGCTTATCGAAATATTACTTAGTCTTAATAATCTAAGAAGATCTTAAGAGATAACATGAAGGCTTATTTAAACAGTTTGAAAAAGGAAATGAGGAGAAAAGTATTTGTACTGTATAATGGAGGCTGACCAGAGCAGTTTAGGAGATTGTAAAGGGAGGTTTTGTGAAGTTCTAAAAGGTTCTAGTTTGAAGGTCGGCCTTGTAGATTAAAACGAAGGTTACCTAAATAGAATCTAAGTGGCATTTA…	LCCLR*MFLFISGEGGWEH*SL*SLPDST*NLTRNKSDKQHS*RNFNWQVEMF*TVPWSLVHYLCVGVLSPLPWS*FLHAGTLTTADIYLFKGPENPDPVRKNSPFTLNR*VKQTCHFQCGDWEALVLSDVLQTVEGASS*IEIHQWTK*GQQVMPNSSYYL*VDTPPTIY*IL*FYEIKTKYLS	45.2814	1.37192e+06	114	209	70.3333
EMBOSS_240_3	3	EMBOSS_240	ENSMUSG00000097928	ENSMUST00000181702	Medium	[E].KAACTEQNVKVFSLNR.[L]	KAACTEQNVKVFSLNR	GCACTCAATCAGGGCGATCCTAGGCTCGCACGGCGGCTGTCCACCGTTTCCCTCCGCCCACCGCGCCGACGCCCGGGCGCCCACGCCACCCTTTCCCCGACCACCCTCTGCGCAGCCCGGGCCCAAGCGGCGGGACGCAGGCTCTCGGACCCGGAGCCGGTTCCCGCTTCTCTCGCTAGAGGGCAGACGGGGCCCGCTCAAAGCCCTCAGACCGAAGGGCACGCGCAGCCGGTAGAGATCCCGCAATCGGAGCCGCACTCCGGGGCTGGGCTCCGCGACCAACGTGGGGTCCGAGATCAGAGCCCGGGAGCGCGACGCACGGCAGACCCAGAGGACCCGGGAGGAACGGCCAGCAATCTCGGGGTGCGCACAGCGCACGGGCACCAGGTGGAGGCGGCG…	TQSGRS*ARTAAVHRFPPPTAPTPGRPRHPFPDHPLRSPGPSGGTQALGPGAGSRFSR*RADGARSKPSDRRARAAGRDPAIGAALRGWAPRPTWGPRSEPGSATHGRPRGPGRNGQQSRGAHSARAPGGGGAGTAVRGPGWAPRELREDTRDAARCPPGSSGAAGTHLGSGRLRRARASRGIPGPSSCPSPCLCLLCAQTSR*R*ALYADPAGRR*RATSLVQGLAEKFVPGGKSQWPGCAGASPVACRERRGLDHLERPLRLGVSRGYSCVPGPAAAGSGVASLRWLSRSLTARRGKGAHSPVYARISRQLPPLRCVPLLLPARPGVPTSFGEVLAGSFSIARKLDAGASFAPSPSPRPLPLSPPHPHPEAQTRHREEPELGDHGSAPFFWQLGQPR…	1.41752	2.19768e+07	error	617	206.333
EMBOSS_372_3	3	EMBOSS_372	ENSMUSG00000091994	ENSMUST00000217802	Medium	[H].KPQFIPLK.[G]	KPQFIPLK	ACCGGAAGTGCGCTGGGCGAGGGGCTTAAGGGGAGCCGAAAGCTGGGTGCGGTCGCCCTAAGCCAACCGGCTTCCTTAAGGGCCTCAGACGCCCGGGATTCCGAGCGCGCCACGCGGAACGAGGCCACACGCACGCGCCCATTGCAGCGGTTAGAGGGATCGGCGGGGGCCAAAAGTCCACGCGCGCGGCAGCGATGGCTGGGACGGAGTGGTGAGCGGAGCGGCGTGCGAGGGGCGCGGCAGGACTTACCCGTCCATGGCACACGGAAGAGACCCGCGGGGAACGGAGCGGAGGCGCAGGAATAGCAGAAACCGACCCAACGGCTCCGAGTTATAGACTCACAAGATGGCGGAGACGCCCGCACACGTCCCCCGCGCGCGATCCTCATTGGTTCCCGC…	RKCAGRGA*GEPKAGCGRPKPTGFLKGLRRPGFRARHAERGHTHAPIAAVRGIGGGQKSTRAAAMAGTEW*AERRARGAAGLTRPWHTEETRGERSGGAGIAETDPTAPSYRLTRWRRRPHTSPARDPHWFPLRSVGVVNPACPRQGLLLVKRLLQGRNASRQQTAVGRDGRQSRRKTETAGGGGGGSE*VDARDTI*ANERAFVRPVGRHLESGYVAGQTQRSVHSGGCLHIASRHWKPLASNVRVKQAASPS*KRAENPVLP*LACGHVARIWPFNRVSPGLDRNEVEATCFIDAVATRL*IISFRLLSTHSSQAPSVSQGWGNRGKEPQCGWFCLKLGKRGYKLSSRRIHWRDETPPSCTFTPAARILPSSPGVSQSKTGSPRPSAGYKTDPLVGL…	4.34051	1.33912e+06	error	195	65.6667
EMBOSS_074_2	2	EMBOSS_074	ENSMUSG00000092274	ENSMUST00000173672	Medium	[R].GDRMAVLSPFLNQKPWIGFMLTPSG.[S]	GDRMAVLSPFLNQKPWIGFMLTPSG	GAGTTAGTGACAAGGAGGGCTCGCTCTTGGGGCTAGTGGTGGGGAGGCAGTGGCCAGTTCAGGGCTCAGATGAGAGAGGTGGCAGAATTAGAGGCAGCCACTAGGATGGGGGTGCGAGGAGAAGCGGGGCTAAGTATAAAGGAGACTAGATTTTGGGACAGTGGACGTGTGGAAGGCAGCTTCCAAAGCGCCTTTAACAATCCACAAAGAACCAGCAGCTTTCAAGACCAGGCTATCCCTGCTGTCTGCTGGCACTTGACGTCCAGGAGGGCACAAGTTTCACAGGCCTACATGGGGGCAGTGTCCTAACTTGAGTGGCAGAGCAGCAGTTGATGGAGACGGGTGGACTGGGGGCCCTTGAAGGCCCCGGAAATCATAGAGGACAGGCAGTGGGGCAGG…	GVSDKEGSLLGLVVGRQWPVQGSDERGGRIRGSH*DGGARRSGAKYKGD*ILGQWTCGRQLPKRL*QSTKNQQLSRPGYPCCLLALDVQEGTSFTGLHGGSVLT*VAEQQLMETGGLGALEGPGNHRGQAVGQD*VRSGGRL*S*QNQQTPFFPDKGL*THLGMRPGLMEGGLSFAGRTALAQGGM*FGCGLSAPTSGCEGRPEEAAETSCFYCQVCQAGTMEIEGASLGATLITTLFFR*QCPLWTLPRFRASSSVVSLFPTLAPHSEVKGSLKTLPLGRPVSLWRM*SRCWSLGHGILVKVEDTLTGRGGMVLIHRGRDVSVDPGVGSQPCFRSPKCFMDVVYHYSVHHGKQMAPGDMEPLPV*VVAVQEGSPWRRQRPRLTPTQ*IPEA*EARPCP…	3.29151	2.28818e+06	error	70	23.6667
EMBOSS_392_1	1	EMBOSS_392	ENSMUSG00000097908	ENSMUST00000197095	Medium	[S].LPPSLLTHFHSSTTQSKINKMK.[K]	LPPSLLTHFHSSTTQSKINKMK	GTCTTGCTCTGCCTCCTCCCACACCAGAAGTGAGCATCAGGTGGTGGCGAGCGCGTAGACAGGGTGAAAGGTGTGAGGGTTAGCGACAGATCTGCGTATTCACCTTGCTGGTCACCGGCCACCACCACCTCGGCGCCAATGAATTTTCTGTCGCGAGCCCCGCTAACGGCTTGCCGCTGAAAACTCTGGGAAATGTAGTTAGGCGCGAGCAAGCTGTCGTTAGTTGCAGGTCTGAGGCGGGAACCGGGGCTCCTCATGTGTTCGCGGCTCGGTTCAGCCTTCCACGAGCTCCTGAAGTTCTGCCATTCCCCGTGGTCTGCAGTTCAGGAAGCTTCTGGAACATGCGGCGCCTCTGCCATGGAAACACGATCCGCGTCGTCAGCTTCAGATGTGATCTTG…	EQAVVSCRSEAGTGAPHVFAARFSLPRAPEVLPFPVVCSSGSFWNMRRLCHGNTIRVVSFRCDLGTLSSPWQLSES*SCEGT*SSPLRKPRAPLPKNIAVCSFPFRWPQDPSRKEEGRTLKDMRGTQLTVQGSQTAL*E*NRRPEPKSFG*NTATDHTLTHLAALLPKAQIIPACEGLLLSLPPSLLTHFHSSTTQSKINK*MKKX	6.57066	1615020	error	139	46.3333
EMBOSS_163_1	1	EMBOSS_163	ENSMUSG00000097546	ENSMUST00000181387	Medium	[K].AGQAQHSQQK.[Q]	AGQAQHSQQK	ATTGGACTGAAGTCAGGGACCCCTATGGAGAAATTAGGGAAAGGACTGAAGGAGCTGAAGAGGAGGGCAATCTCATAGGAAAACCAGAAGTCTCAACTAACCCAGACAGACCCCTGGGAGCTCTGGGAGACTGAGCCAACAACCAGGCAGGATTCATGGGCTTGTCCAAGGACCCCCCAGCACACATTTAGAAGATGACTGCCTGGTCTGGCCTCAGTGAGAGAAGATGTGCCTAATCCTCAAGAGACTTGAGGCCCCAGAGAAGGAGGATGCCAGGGTAGGGAGTACCCTCTTGGAGAGCAACCATCATTGCTAAATGCTGGTCAATTTCTGGCTGGCTGGCAGATTCTCCTTCGCCTCTGAGAGGGTCGTGCATCAACTTCAGCTCACTTTCCCAAG…	IGLKSGTPMEKLGKGLKELKRRAIS*ENQKSQLTQTDPWELWETEPTTRQDSWACPRTPQHTFRR*LPGLASVREDVPNPQET*GPREGGCQGREYPLGEQPSLLNAGQFLAGWQILLRL*EGRASTSAHFPKICWSFCSVQQDSLREDQ*LSLGKAGQAQH*SQQKQLRWAESAVES*RVVLFLEWGE*HQMDG*RIQEQPLGWKALHCEQDLLLLLPLLMQLLLLPLLSDAAWLPALLSVKVKAMPVEES*RSCEDT**SYIKNLSEISKILLT*DKTGRNT*STALLGTFLSYYAKFSYILRELESAQKMKSQQNH*I*IMKPALHRIK*SK*IHC*LTGYNFSSRVCTGCI*SAIKSINHVVIIAVLRIKLMSSNL*CPTVSVS*KQ*LITI*CF…	4.92112	260674	error	25	8.33333
EMBOSS_006_2	2	EMBOSS_006	ENSMUSG00000021268	ENSMUST00000143272	Medium	[R].KQNYSPEVVNVVFDGFGTKSIG.[W]	KQNYSPEVVNVVFDGFGTKSIG	GACTTTTGGTAAATCACCTTTTGCCGTTTCCTTTGTCCCCGTGAAGCCCCCCCTGGCCGCCCCCTCCTCATTCTGGGCTGGCTGGCTGAGGGGGGGGGCAGCCTGAGGGCTGCGACGTGGCAGGTTTCTAGAATGTTCTATTGATGGCCGCAAGAGGGCGCTGGTGGCACTGCGGAATTTTGGGGGGCGGGGTGGGGAGGGAAGAGGAGGTGGCCTTTGTTCTCCTGCAGGAGGGGGTCGGGAGCGAGATGGGTTGCGGGACCATGGGTTCATTTACCTATGGGGAAATGTTAGTAGATACCTGGATTCACTAAGGTGCGCTTGCAGGACTTACAATAGGTCAGAGATGGCGTCATCTGCAGTGGCTGTGTGATTTAGGGTGTCATGGACGCAGATTAA…	TFGKSPFAVSFVPVKPPLAAPSSFWAGWLRGGAA*GLRRGRFLECSIDGRKRALVALRNFGGRGGEGRGGGLCSPAGGGRERDGLRDHGFIYLWGNVSRYLDSLRCACRTYNRSEMASSAVAV*FRVSWTQINLFSVICVFWGLRKVWLFEEELQKILIN*ASSIRVLRVDVAKGGQGFEEKGVNWVGGGRVVCLYFVI*LKTSKMSVLY*ELSL*ILIMLNWIY*WWVGAASCFYLSGVELWSGGSPLLQGLFGARRLLDACVCAASCLENGSGRGDGGA*RPLKMADVGSAPPPQA*NLLGALPPPTSV*L*QLRPGACGGASGGWAIGVLVSAGRAPPSGLYVQMVLGLPD*R*SCACAHS*HL*PVNQFICTPPIAVLPSHFSSYFSSHFYFPSS…	6.90162	349851	error	133	44.6667
EMBOSS_299_1	1	EMBOSS_299	ENSMUSG00000108621	ENSMUST00000188038	Medium	[E].KAQESGQAK.[I]	KAQESGQAK	CGGACACGGGTACGAGTGGGCCCCGCTTTCGGCGCTGGTACCAGGAGCTCTGAGAGGAACGTGGGCGAGCTCGGAAGCTGCGCCATGGATCTCGGGTTTCCCAAGTTGGCCTCAAACTTTCTCTTAGCTGAGGAGGACCTTGAACTTCTGATCCCGCTACCCAAACCCACCTCCAGAGTGCTGGGATTAAGGGAGTTTTTGGCCTTTGAGGATGTGGCTGTGGAGTTCAGCCAGGAAGAATGGGTTTTGCTGGATCCTTCTCAGAAGAAACTATACAGAGATGTGATGCTGGAAACCTGCAATAACCTTTCTTCAATAGGCATCAAATGGGAAGACAAGAACATTGACGAGCAGTACAAACACTCTTGGAGATTCCTAAGGGGACAAACCATCTGAACA…	VLCVGSPWRTRVRVGPAFGAGTRSSERNVGELGSCAMDLGFPKLASNFLLAEEDLELLIPLPKPTSRVLGLREFLAFEDVAVEFSQEEWVLLDPSQKKLYRDVMLETCNNLSSIGIKWEDKNIDEQYKHSWRFLRSCMIDAIYEHREGGQFQETFTWIPDFHRSTDISTEVKPFECGVCGKVFTCHSSFNEHIMSHLGDKPSEHKHGSCGIQQQSQSVEKSYKQCGMAFACHCSLSIDGRTNSKDKCYKCEQSSKALSSSSSLQSHKTVYGAGRTYECEECGKSFRHESSFLLHQLTHIGRKSYECKQCGKAFRCHSYLQLHENFHIEENPYECKQCGKTLCSPSSLRVHERIHNGEKLYACKRCDKTFKCQSYLRIHERTHTGERCYDCEQCGKAFRS…	3.54781	4.22596e+07	error	85	28.3333
EMBOSS_023_2	2	EMBOSS_023	ENSMUSG00000087246	ENSMUST00000135767	Medium	[R].QLSLQSPFVGAQDFFSSTFMHAALRNMMGLLLKTFTG.[S]	QLSLQSPFVGAQDFFSSTFMHAALRNMMGLLLKTFTG	AGCCAATTAAGGATGGATTTTACAGTTTGAGTCTCAGGGTAACCTCATTTCCATATCTCTAGTCTTGATTTAGATTTTTAACTCCCTCTCACTTTGAGATTAAGCACCGGTTTGCAAAGGGCCCCACAGACTTCAGTGCATAAAACAGAGGACCCGCGCCTCCAGGCACTGGTAAGGAATCAATGGCTCCTTCCGCTCTTTGTCTGTGCGCTTGGCGCTGTAAGCTGCTACCTTGATTTTGGAGATTTGAGACAGAAGTTGGCTGCAGAACCTGTTATTGAGAGCAAAGATCTTTTGAATTACACTGAGAATCGGAGTCCTGCAGAAACTGAACCAGAAAAAAGAAAACAGACCGATCATCTGTTTGTGCTGGCTCTGCAAGCCAGGGTGCTGGCGGGA…	AN*GWILQFESQGNLISISLVLI*IFNSLSL*D*APVCKGPHRLQCIKQRTRASRHW*GINGSFRSLSVRLAL*AATLILEI*DRSWLQNLLLRAKIF*ITLRIGVLQKLNQKKENRPIICLCWLCKPGCWRERPEHFSC*EKVMGMKGGKRKKEPTKYQKTSYRELRKIISPELASYHSSLRSLDPQGHS*ILGLTGAHLWQKEPV*SLQSSLLRDGWVT*CSLTAEEVPSLDFSGIR*GYVWPGSPSSKNQSLNLRQDQPIRARM*TA*EYILHTAGPRKGPLPRSKTLSGISLPPSSQFLGIFILSL*EPATFSAPLGLCGINYTYDILNLDVSTPDSECTNLAWAE*LPRCREPSASGVRLPLDGMREWQKAGKAWQN*ETL*TRGPQPS*CYHP…	15.469	8.9169e+06	error	13	4.66667
EMBOSS_135_1	1	EMBOSS_135	ENSMUSG00000097616	ENSMUST00000181225	Medium	[R].CVQASAVGVEDPLQVSMQ.[S]	CVQASAVGVEDPLQVSMQ	AGGCTGCTTGTTGTTCGGGTTTCACAAGTTTGCCCTCTGGTTTTACTGTTAAAGAGAGGCCATTGTAACTGAGAACTAGCTTCGAATACAGCTGCTGCTACATCTTTCCAGGCTTATGAGATAATCCTGTTTTTGGTAGCCAGGTATTTAACATCTGTCTTTCAACGGGATGTAACTCTCATCTACTTCTCCAGAACCAAGTCTACATGAAGCCATGTGCCTGCTGCCACGCTTCACACCTGGATGATAATGGACTCACCTCTGGAAACAAGCCCCCAAATTATATGCTTTCTTTTATAAGAATTGCTTTGGCTATGGTGTTCTTCACAGCAATAAAATAGCGATGAAGACAGTAGTTGATACCAGGAAACCGAGTATTGCTGTGACAGGCATGACCAT…	RLLVVRVSQVCPLVLLLKRGHCN*ELASNTAAATSFQAYEIILFLVARYLTSVFQRDVTLIYFSRTKST*SHVPAATLHTWMIMDSPLETSPQIICFLL*ELLWLWCSSQQ*NSDEDSS*YQETEYCCDRHDHAVYWQNVNFGLEK*LSGLSRDFMGYTSSKDTCIGKM*TSGRPAQEVAEGEIIQSEYKAT**PFLMYFSKEVAAFAHVLKICPSF*LMMAEEMSRQLRIDHIIWLLVITLI*VSNGKDKARQKEIPNVQIEGKRKH*RV*WS*VQCF*KIKI*RKI*H*VESKEQ*PQVRSHSVKVPTCKRELKKFKQ*RKLSRRES*CKCK*IRGPSSGQQAAEFGSFSQVVLALESRKSREQVLTIYKGMALPPLAKKRC*VQASAVGVEDPLQV…	1.24918	2.34209e+06	error	116	38.6667
EMBOSS_308_2	2	EMBOSS_308	ENSMUSG00000110567	ENSMUST00000212293	Medium	[K].QASSVPRPRPPQLSGMC.[A]	QASSVPRPRPPQLSGMC	CCACCCCCCCCGCTCCCCGTTGGTTATCCACATCTTCTGGCCATTGATAACATATTCGTAACCCTTCTTCTCGGCTTTGGTCTTAATGCCCGCCACATCAGAGCCTGCGGAGGGCTCTGTCACACAGTAGGCACACATCATCGCTGCCCCGTCATCCTCCCCAAATACTTCTTTTTTTGTTGATCATTTGCCCCAAAGAATTTGCTTCAATACAGTTTGCACCCCTGTACACCCATACGCCAACTCTTCGGTAATTAAACAAGCATCGAGCGTTCCCAGGCCAAGACCACCGCAACTTTCTGGAATGTGTGCTCTGATCAAGCCAAGTTTGATGAGAGTGAATGGGTACTCCCCACTTTTGTCATATTCCGGGGCGACAGGGATAATCTCCTCTCTGGT…	HPPRSPLVIHIFWPLITYS*PFFSALVLMPATSEPAEGSVTQ*AHIIAAPSSSPNTSFFVDHLPQRICFNTVCTPVHPYANSSVIKQASSVPRPRPPQLSGMCALIKPSLMRVNGYSPLLSYSGATGIISSLVNFWAVA*NSFCCSVNSKLNPNPGSCLRDAFVCCVRHSKWETLLRTLQLLRTPLP*WLLDLLPPTTSGKQAGYCNFYQGLQRST*CLAVGLISCIHQLLNEDSMMTTGICNQSMNL*AILLLGPGHQVSFKSDQEELSVPSTAPCLIE*SLASHHEDNGLNF*AX	3.62866	4.06811e+06	87	86	29
EMBOSS_194_2	2	EMBOSS_194	ENSMUSG00000097379	ENSMUST00000181390	Medium	[G].KQTQQSLPR.[F]	KQTQQSLPR	AGACAGGGTTTGTGTAATCTTGGCTCTCCTGGAACTCACTCTCCAGACCAGGATGACCTCAAACTCCAATCTACCTGCTGATTGCCACCATGCCTGGCTATGTTTTTATTTACTTACCAGACAGGGTCTTTCTACATAGCTCTGGCTGTCCTCAAAGTGTGTAGACCAGGCTGCTTCCTGAGTGCTTGGAATTAAAGGAAGGCACCACCACCCCGGCTCTGGGCCAATGAGAACGGCACCAAAAGACCCGCTGCTGCTCGTCTACCCATTACTGATTCATCTCCACTCCAGAAGTCTAAAGAAACAGAAGACGATCAGTTTCACTCCAATGGTCAAATAACTGTGTACTGACTGTCTCAGGTGATCCTAAAGCCAACTCACCAATGTAGTAAAAGCCCA…	DRVCVILALLELTLQTRMTSNSNLPADCHHAWLCFYLLTRQGLST*LWLSSKCVDQAAS*VLGIKGRHHHPGSGPMRTAPKDPLLLVYPLLIHLHSRSLKKQKTISFTPMVK*LCTDCLR*S*SQLTNVVKAQV*PTEGEKRELQIALSCSIIYYM*IQNLRIQAHLQLTKLKTKP*RLKPQHMRRAASASRVLGLKACTSMPGSKLYLLMYYMLHRFQFYI*KIK*IFLDKFRRNMKKLHF*EFHCYCSAKS*MFLNSPRTVIETTISYFLLYSSVCTCILVCTRVC*SQRPAYIVFLCHSPSCSFETGSVSH*TW*QSTSSRNSPVFTCLW*VNRHTSPRLASFLCVHLGYNVILDSSHLIL*CLILSKTKHSNSLITSEF*YI*KNEVIYLEFTLC…	1.54922	4.59685e+06	509	53	18
EMBOSS_230_2	2	EMBOSS_230	ENSMUSG00000098098	ENSMUST00000183087	Medium	[R].KDARLWLCAG.[I]	KDARLWLCAG	ATCTCTGCCCCTCAGAGTCCTGGGGAGGATGGATGGAACAGGAGGAGCATCATGAGAAGGCTTCCTGTAAACTACGGAGGGTGAGGGGACGGAGCGTGAGGGAACGTCGTGAGATGGTGCTCGTGGAAGCCAGCAGAGGGTGTAGGGTCTCCTGGAGCCACATCTCTGGAGTTACATGAAGTTGTGGACCTCTCAACATGGGTTCTGGGAACTGAACCCAGGTCCTCTGGAAGGACATCGAGTGCTCTTAACCACTGAGCCATCTCTGCAGCCTAACCCCATCCCTTGGAGGCTGAAGCAAAGCAAGTTCAATGACCGTGCGACCTGGCTCTTGTTTGGGCCTAAGGAAAAGCCGACTGTAAGCCGGGAAGCATCTCTGGCAAGAACAAGGAAGGATTA…	SLPLRVLGRMDGTGGAS*EGFL*TTEGEGTEREGTS*DGARGSQQRV*GLLEPHLWSYMKLWTSQHGFWELNPGPLEGHRVLLTTEPSLQPNPIPWRLKQSKFNDRATWLLFGPKEKPTVSREASLARTRKD*ARLWLCAGITRCSCSGKSHH*GRSKSCIFYLENSFPCGCPPNPTEMNGF*FT*LI**TLKINV	2.06707	515833	error	29	10
EMBOSS_061_1	1	EMBOSS_061	ENSMUSG00000073000	ENSMUST00000101281	Medium	[Q].LNVVLTR.[V]	LNVVLTR	AGGAAGTGGGTCGCTGAAATTGAGATGGCCACAGAAAAGGGACCATCAGATGTGCGATCATGCAGTCAACTGTGCAGGCTTGCAGGATTGGAGCCCTCGGATACAGGAGCTGCACTGTGGCCAAACATCCCTGTTTCTTCAGGTTTGGGAACAAATCGAGACTGTTTTCTTCCCGAGAAGCAAACACTTCAGATAACTAGCGGCAGTTCTTAGAAAGAATGTGAACGGATCTCCCCACCTCCGAAGCTGTCTGGAAACCTGGAAAGTCTATTCATGAGGAAAGAGGATTCACGATGACTGGAGATTTAATCAAGACCTTGTACGCACTGGGCATGGGCTTTTCTGTTGAGCTGCATCCTAGCCCTTTTATTTTGATTTGTGATAAAAATTGCAACATCT…	RKWVAEIEMATEKGPSDVRSCSQLCRLAGLEPSDTGAALWPNIPVSSGLGTNRDCFLPEKQTLQITSGSS*KECERISPPPKLSGNLESLFMRKEDSR*LEI*SRPCTHWAWAFLLSCILALLF*FVIKIATS*SRSYSLTGREGPKAVHVVTL**TWISVTISE*TENVMV*MCSAQGVVQ*EGVALLE*VCPVGLGFKTLVLAAWKSVFCYQPSDEDVEFSSPTAPCLLRHCHTLALMIMD*TSEPVSQPQLNVVLTRVASVVVSVNNSKPLTKT*GFAD**CLPLRTRQQPTEGRILH*ALKKVWGEESTY*GKAEEGWE*VSLRSRD*CCRAGIQHVTPQRRGGPPRDGQLIGGADGSGLPDSTRACLCICVSPVCLASAEV*RRHWIDPLGLEL…	1.91728	2.02864e+07	254	25	8.33333
EMBOSS_080_1	1	EMBOSS_080	ENSMUSG00000097358	ENSMUST00000180772	Medium	[Y].LDVTSDFVNDINMNLNLYK.[L]	LDVTSDFVNDINMNLNLYK	TAAAACAAGCATAGAAACCTGGGGAGGGTGACAGGGCTCACCAGGTTGCGGCACTTCCCACTAAAGCTGACATCTCTCCTGCATTCCCAGGACCCACACGACAGGAAGAATCAATTCCCAGAAGCTGTCGTCTGGCATTCACACATGCATGGTGGCACACAACCATTACCTATAGTTAATAAATACAAGTAATTAAAAGGGAAAACAAAGGACAGTAGTTTAAGGAGTGTGCCTTGCCTGGCATTTACCACATCGAGAAGTGACCTGCGTTGGAATGGCATACTCAGGTCATCAAGGGAGAAGCAGGCTGCAGGAGAAGGGGACTTGGGATCAAGAGGGAAATGAAGAGCTGAGCACCCAGAACCAGCTCGGAGAGGCAGGCAGGCTCAGGAAGAGCAG…	*NKHRNLGRVTGLTRLRHFPLKLTSLLHSQDPHDRKNQFPEAVVWHSHMHGGTQPLPIVNKYK*LKGKTKDSSLRSVPCLAFTTSRSDLRWNGILRSSREKQAAGEGDLGSRGK*RAEHPEPARRGRQAQEEQ*ELSLLSARCSGDNCLTGGGAAGSAAAPHSALLTLVFWK*AVFPSIGLHCSLPR*SQYYIPVFFIPSSHGTLGFHPKL*IFSDFIGYLMSL*GLGRQRFKMTLNTHLHI*DRTHTHTSS*FTLQQNHPGGMLIVETFYKHIKPIITNA*HSL*PILSRTYFSHNLGTNEVPDI*KKNNKCLMSEEINHTNISNLGFLGVKLRARYFVYIVTIA*NTFLRR*SPDFTREETAHWERVPKT*SPQLKIAQSLISMTLRLGKGIHKLNY…	1.49883	2.22384e+06	error	145	48.3333
EMBOSS_144_2	2	EMBOSS_144	ENSMUSG00000097578	ENSMUST00000181384	Medium	[R].DLVSKINESINTKCN.[G]	DLVSKINESINTKCN	AAAAAGAGGGACTGAGATGTAGCTCAGTTAGTAGAATGCTTAATAGCATGCATGAAACCCTGGGTTTAATCCCAAACATTATATAAATTAGTCATGGTGGTACACCCTGTAATCCAGGCACTTGGGAAACAGAGGAAGGGGAACAGAAGTTTACAGTAACCCTCAATCTATAAAGTAATATTTGAGATCAGACTGGGTAAAATTAGATCCTGTCTCAAAAAAGTAAACAAGTAAAGAGTTGAAAGAAGAGCAATTTCATGGCTACATCATTGTGAAGATTACACAAGATGATACAGGTAAGACACTTAAAAAGTGTTTGGGCCTGCCAAGCATGGTAGGACTGGGACCAGTCATTATTGTTATTAGTTTAAATATTTTAAACAGCACCCTTTCCATAAG…	KRGTEM*LS**NA**HA*NPGFNPKHYIN*SWWYTL*SRHLGNRGRGTEVYSNPQSIK*YLRSDWVKLDPVSKK*TSKELKEEQFHGYIIVKITQDDTGKTLKKCLGLPSMVGLGPVIIVISLNILNSTLSIRRKREEGCRAKLP*VQILALLHQSLYLSNREIIAPIVYGYLKD*MRNSHIN*IQSWAWWCMP*ILALVGQR*GDLC*L*ASLVYIASSRTAEATERDLVSK*INESINTKCNGTQEILSTFIMCTK*RAIPNALNIISLLKIVCSA*PLLFHICRLDTFSLMAPGLLRSFPLVSAEGKPCLLSLTCNHSLISITASTQLLHLIRRCYYPAISLLPRSLGLSLSSLTLSYPSSIVTYGSKKLQQLFLQNTSLN*LLRFEPQHPLLSR*…	0.862102	1.33098e+07	error	17	6
EMBOSS_049_2	2	EMBOSS_049	ENSMUSG00000075511	ENSMUST00000100370	Medium	[L].GAEDMRPGR.[C]	GAEDMRPGR	AGTTGGTCTCTGAGGCGGCGGCGGTAACAGTTAATCTCAGGAGGTCCTGCTCGGTCCGGGCGCCATGCCTCTGGATCGTCAGGTGGCCATGGGGAACCTTGGCAATCAGGACATACTGGCCATCTTCTACCGCCTGCGCTTCGTGCTTAGCAACCACATAGAGGCCGCCTGGCGAGCCCGGAACCCGGCAATGGACGTGGGAGGAGGAGGAGAAGGCGCCCGGTTGGTCAACGGTCGTATTCGCCCACGCGGGTTCTGAGTGACTTGGAGCACTGCTCGCCCTCGCCCAATGCCTGGCATAGGATATGACTGTCAATATTTAGCTCAACAAGAAGACATGGCATTTACACACAAAAGGAAGACATGATTCATTGGTTTTAAGTAAATACAACATAATGC…	VGL*GGGGNS*SQEVLLGPGAMPLDRQVAMGNLGNQDILAIFYRLRFVLSNHIEAAWRARNPAMDVGGGGEGARLVNGRIRPRGF*VTWSTARPRPMPGIGYDCQYLAQQEDMAFTHKRKT*FIGFK*IQHNAS*KCLDSRAD*WRTHHDPLIP**LTHGMGYQ**KMTTINSLSRLIPRYLIRPKLGSLGP*LTVKHPLILLVLLLLRGPA*ITFFSSLKAAGQKSTATTTKEAGPLTFEDGLHTSSLSLSLRMDGVF*LQC*KSELSKYNLQNISFHQLLGVT*WSLKFYLYVNDPMKLRDSYFHSWDDSANCY*KEDETLRPL*QSTSSSGKCKLQDQEARTTD*SAFCTLLSSIQFTCRVAGR*CVQYVERQVGPGHK*ATLGLLLPGLQPSRAG…	3.64721	2.7426e+06	467	65	22
EMBOSS_227_2	2	EMBOSS_227	ENSMUSG00000097660	ENSMUST00000180864	Medium	[G].IRDVQGTTGGHPR.[S]	IRDVQGTTGGHPR	GGTTTTACGAGATAGGGTTTCTCTGTGTAGCCCTGGTGGCTGTCCTGGAACTCACTTTGTAGACCAGGCTGGCCTCAGAAATCCGCCTGCCTCTGCCTCCCAAGTGCTGGGATTAAAGGCGTGCACAACCACGCCTGGCTCTGCTTGTGGGTTTTCTAGTCTTATTTTATGTGCATCCATTTCTTTTCCATGTATGTATATGTACCACACGCATGCTGGTGCCCACAGAGGTCAGAAGAGAGCATTGGAGCCACTGGAATTGGAGTTATAGACAATTGTGATGCACTGTGTGGGTGCTGAGACTTGAACCTGGATCTTCTGCAAAAGCAGCCAACGTTGTTAACTAAGGAGGCCTGGTGCCAGGCACAGGAAAAAATATTTAGTTGCTCAGCTTCTCAC…	VLRDRVSLCSPGGCPGTHFVDQAGLRNPPASASQVLGLKACTTTPGSACGFSSLILCASISFPCMYMYHTHAGAHRGQKRALEPLELEL*TIVMHCVGAET*TWIFCKSSQRC*LRRPGARHRKKYLVAQLLTQSRTHKL*EKNTFLI*VHTAFLPVYEVLGHTPLLFCI*KQCHHSPPGWPPECWVTGCATTPDQ*LTVQ*QDNTATVTDNPDKGGEVFFWLLFLLYCVIF*YMDLNNDQVRVTGISIVSNSYHFSL*ELACHMPGSLALTSDSPTSASPLLRPAAATLA*LYSLLLRGPVSGSRIPHWDRHWLAVFCLPFHWVF*FETGSPHIAQAGPGLANLPTSGSLC*DYRHDPPHPSCAF*TKNTWSV*SQPIQEPALTGCHPAIAMEGD*HR…	29.1976	1.47553e+07	error	169	56.6667
EMBOSS_401_1	1	EMBOSS_401	ENSMUSG00000113495	ENSMUST00000222522	Medium	[R].RQVFSLALEFR.[Q]	RQVFSLALEFR	GGTCAGTTTTAGTTTTAGAAGGAAACACTTATTAAATATAGGTGGGCATGTTGTTCCCAGATAAAACCTTTTTTTTTTTTTTTGGCTTAATGAGGCTGAGTGGTTCAGCCTAGCTGGTTAGAGTAGTTAGGACACAGTCCCTAGTCCTAACACTATTAACAGAAGTCTCCCATTGTAGTCTCCCCTCCCCCAGCCTGAAACCTGTTTGCTCTGGGGTGGAGCTTTTTGCTCATTCGTTCTGCCACGCCCACTGCTGGAACCTGCCGCCTTGCTGTTCCAAAGCCATCATGTGCTCACCCTGCTACTGGATTCCGAGATTATTTGGTGGGAATCGGGTCCCCTCCCCCTTCCTTCATAACTGAGTGTTGCAACAGTAAAAATTGAACTTTGATCAGAGTG…	GQF*F*KETLIKYRWACCSQIKPFFFFLA**G*VVQPSWLE*LGHSP*S*HY*QKSPIVVSPPPA*NLFALGWSFLLIRSATPTAGTCRLAVPKPSCAHPATGFRDYLVGIGSPPPSFITECCNSKN*TLIRVTFDLAPFFLPPV*FFSFSLSCHLSRTVHWELQAGRNSLAPEQGPGEWQKGAEKTLLVWSSTGKAKDLRIRPRSNEQVNQHSPAGPVDVHPRPPRAQWWQLLSSFPGHSSTWFSV*VEI*VYQEG*KSRYF*Y**RLVFILIDRLSPLAGLWLFTLAVTARCP*FLRLWK*QR*RGTTPSSYFSHESWCY**HNSCLGLAKSEVDNSPLGAAQYSELCILVRDHTNTVWVSLGAKNYCRGRSSLTISEFPVGYTRFKKEVGI*FWLK…	1.92965	624581	588	48	16
EMBOSS_308_3	3	EMBOSS_308	ENSMUSG00000110567	ENSMUST00000212293	Medium	[K].KNSQFLLQ.[H]	KNSQFLLQ	CCACCCCCCCCGCTCCCCGTTGGTTATCCACATCTTCTGGCCATTGATAACATATTCGTAACCCTTCTTCTCGGCTTTGGTCTTAATGCCCGCCACATCAGAGCCTGCGGAGGGCTCTGTCACACAGTAGGCACACATCATCGCTGCCCCGTCATCCTCCCCAAATACTTCTTTTTTTGTTGATCATTTGCCCCAAAGAATTTGCTTCAATACAGTTTGCACCCCTGTACACCCATACGCCAACTCTTCGGTAATTAAACAAGCATCGAGCGTTCCCAGGCCAAGACCACCGCAACTTTCTGGAATGTGTGCTCTGATCAAGCCAAGTTTGATGAGAGTGAATGGGTACTCCCCACTTTTGTCATATTCCGGGGCGACAGGGATAATCTCCTCTCTGGT…	TPPAPRWLSTSSGH**HIRNPSSRLWS*CPPHQSLRRALSHSRHTSSLPRHPPQILLFLLIICPKEFASIQFAPLYTHTPTLR*LNKHRAFPGQDHRNFLECVL*SSQV**E*MGTPHFCHIPGRQG*SPLW*TSGQLLETLSAVPSTQN*TLIRAPA*ETLLCVVFDTQNGKHFSGPCSFCERRCHDGSSICCLRPPLGSKPATVIFIKVCRGPPNVWLWVSSAAFISCSMKTL**QLGYATNL*ISEQSSFWDLAIKSVLSQIKKNSQFLLQHHA*LNDPLLPTMKIMD*TSEPX	3.62866	1.11633e+06	267	86	29.3333
EMBOSS_202_3	3	EMBOSS_202	ENSMUSG00000097772	ENSMUST00000181873	Medium	[F].VNALASCLRQLPR.[N]	VNALASCLRQLPR	TCCATTCGGTCCTCCTTTTGTTAACGCTCTGGCATCATGTCTACGCCAGCTCCCGCGCAATCCGGCGCCATCGCGCTTTGGGCGAGCATGGCCATGGGGAGTAGAGAGGTGGAAACCGAGCTGACGCCTGCCTGACCCTGGCGATGGTGGCGCGCGCCGGGAAGGACTGATTGGAGAATGGCGCCAAATGGGTCACGGATGGCGAGGGGGCACAGGAGCTCTCGATGTGACCTGGCGCTGTGGATGTGATGCACAGCAGCTTGAGTGGGACTGCTCCGCTGTCCTCATGAGAGAACGCTTTTTCTGAAGATGGGAGGTGGCTAATGAAAGAAGGAATTGTGTTCTCGGTGATGCCTGGAAGAGATGCGTGACGTTGGAAGATGATTACGAAATACAGGA…	VGTFSLPFGPPFVNALASCLRQLPRNPAPSRFGRAWPWGVERWKPS*RLPDPGDGGARREGLIGEWRQMGHGWRGGTGALDVTWRCGCDAQQLEWDCSAVLMRERFF*RWEVANERRNCVLGDAWKRCVTLEDDYEIQERNEIKGCFL*E*HLQKYSLI*RFI*GLVTSVNSWDPQCGRRDLTPESCLLTTYTQYVNKCN*KIKIVKL	3.44038	2.47119e+07	13	37	13
EMBOSS_108_3	3	EMBOSS_108	ENSMUSG00000078706	ENSMUST00000150490	Medium	[R].TMLLHEER.[G]	TMLLHEER	AGAGGGCGCCAAAGGCGACGCGCTGGCGGCCAGCTCCAAGCCAACCAGGCCCATTGCGTCCGTCTGCAGGAACCTGTCCCTTCACCCTGCTTTGGACACTGAGCTTCGGAGGATCTGGCTGCGAGCTGATTCAACGCCAGGGCGCCGCCTAGAGGTCGGTCGCGTCCTCGGTCTCGCTCACCGACCACAGAGCTGCTTGTCCAAGCCACAGTGTCAGACTTAAACAAAACAAAACAAAATTCCTGCTTGGATCAGAGACTTGGCTTCTGGGACCGTTGACTTATCAGAAACTTGCCTCCTCTCTGCTTCATAACGAACCCCAGGAAGAGAGAGGGACCAGGGATCTCAAAGAAATATTTGTCCTTGTGGCACCGACTAGGTGGAAGAAAAGTCTCAACA…	SSPDPPSAVGATTPDTVHEASKRGGGGPGPTLG*PPIWSQDTSGSRNGWRTARFQERAPKATRWRPAPSQPGPLRPSAGTCPFTLLWTLSFGGSGCELIQRQGAA*RSVASSVSLTDHRAACPSHSVRLKQNKTKFLLGSETWLLGPLTYQKLASSLLHNEPQEERGTRDLKEIFVLVAPTRWKKSLNMSVSFKDLRFCV*VCTGSSHYPDCSA*PPSPVRARTML*LHEERGHGKVTLFS*RSITRFLDNLEMDMFWKRIWKTSVCVCVCVCVCVCVCVQ**EKIAHIAFTY*VNSHWCPSNSQGGTWRHQ*PCPGKFVLSP*KLIFEIRMTLEGIRPTGLRCP*SPCRLLFGD*DQKPELWSCRASKNACSESVYTHKVC*AKGVPLRFSKEPLSPV…	1.34239	5.06179e+06	error	399	133.667
EMBOSS_057_1	1	EMBOSS_057	ENSMUSG00000064263	ENSMUST00000079720	Medium	[P].QPNAQAHLRSKGMSCVIPESQVPGR.[Q]	QPNAQAHLRSKGMSCVIPESQVPGR	TTTCAGAGATGCAGTGACTCTGCCAGATGCTTCAGTGTCTCCCAGGAGGCAGGTTTTGCAGTGCATGGAGAGGAACCAGCTGGCAGAGAAAGCAGGTTCAAGCTCAAGCAGCAATCAGATCATGTAGAATGACCACAGCCAAATGCACAAGCCCATTTGAGAAGCAAGGGAATGTCTTGTGTGATCCCAGAATCCCAGGTCCCGGGAAGACAGAAATGTTGCTGAGACCCCGTGGCAGCTTGGGTTCAAGCAAGACAAAGCTGCAGCCAACAGGGCTGCCATCTTCTCACTCTCTAAAGGAATGTGAGAGGGTGACCACCCTACAACCCAGGGAAATGGGTTCTTGTTCTAGCCTGGTGTTGGAGAATCACTCTCTGCATCTGGCCTGACACCAGCCAT…	FQRCSDSARCFSVSQEAGFAVHGEEPAGRESRFKLKQQSDHVE*PQPNAQAHLRSKGMSCVIPESQVPGRQKCC*DPVAAWVQARQSCSQQGCHLLTL*RNVRG*PPYNPGKWVLVLAWCWRITLCIWPDTSHPPPAAREPGNLMASLASKRVEYAKEMTHSRPARSAMKQRPNCHLFHQVRWWLPYLCL*FMSRCHHEPWQIWETIKCMICRX	1.66145	2.89849e+06	46	9	3
EMBOSS_137_3	3	EMBOSS_137	ENSMUSG00000098318	ENSMUST00000183867	Medium	[R].KDIYCLYGLKYEQTPV.[L]	KDIYCLYGLKYEQTPV	GGGTAGAGATGTAGCATCAAACATTCACGGATGTCCAGGGAGCACGGGCACACAGGCTGCTGGCCAGAGGTACTAGGAAGGTACAGGCGGGAGTTCGACGAGGACGCACCTTCCCCTGTCTTGGAAAGACTATTATGAGCACAATACACTAGTCATGTCGGAGATAACAGCCTGACCTCAGCGTGGCTGCAAAATGAAGCCACTTTTGGCTTTCCTAAGCCATCAGGAGGCTGCTCACAGCGCTGCTGGACTCTTTAAGCCCTGAGGTCATGTGAAAAGAAGTTTGCCCTGTGTCCTTCTGTCTCCTGTTGGCTGTCCACAAAATGGAGAAGGCGGAAGCAACCTGAGGCGTCCTCTTTGTCTGTAAAGATAGAGAGTCCATTGTGGAAGGGGGAGATA…	KCR*QNAGGKLQFG*RCSIKHSRMSREHGHTGCWPEVLGRYRREFDEDAPSPVLERRLLTALLDSLSPEVM*KEVCPVSFCLLLAVHKMEKAEAT*GVLFVCKDRESIVEGGDTGTI*ARLYRTASLISRILLQKRKK*TFIWLKPLLFLGSVTSCQMQILTDRKVLDGV*AGEWMLPVQWLCSGGSVGVEHPGGYQEIKMAWQMGADSENTPHKVSRTFFSPRTPLLKYCYTVAL*TSIDGVI*SPLLSAGLKAGLFRRCVLFVPKKKSSR*RMEREGVSALQESQVTPCRRLQGKDFVTRDCLMKIHQSLMKISFTE*QL*IMSQMYILL*LIA*IHILPISNLLFS**LHHRKIRQDCSILR*KDIYCLYGL*KYEQTPVLAHSVIQVLVSQRQKD…	4.50313	936098	error	9	3.66667
EMBOSS_135_2	2	EMBOSS_135	ENSMUSG00000097616	ENSMUST00000181225	Medium	[T].LVQIDFVNLDQTSGSLMLGHPLSAYNIVQFGKITKYFPFK.[I]	LVQIDFVNLDQTSGSLMLGHPLSAYNIVQFGKITKYFPFK	AGGCTGCTTGTTGTTCGGGTTTCACAAGTTTGCCCTCTGGTTTTACTGTTAAAGAGAGGCCATTGTAACTGAGAACTAGCTTCGAATACAGCTGCTGCTACATCTTTCCAGGCTTATGAGATAATCCTGTTTTTGGTAGCCAGGTATTTAACATCTGTCTTTCAACGGGATGTAACTCTCATCTACTTCTCCAGAACCAAGTCTACATGAAGCCATGTGCCTGCTGCCACGCTTCACACCTGGATGATAATGGACTCACCTCTGGAAACAAGCCCCCAAATTATATGCTTTCTTTTATAAGAATTGCTTTGGCTATGGTGTTCTTCACAGCAATAAAATAGCGATGAAGACAGTAGTTGATACCAGGAAACCGAGTATTGCTGTGACAGGCATGACCAT…	GCLLFGFHKFALWFYC*REAIVTEN*LRIQLLLHLSRLMR*SCFW*PGI*HLSFNGM*LSSTSPEPSLHEAMCLLPRFTPG**WTHLWKQAPKLYAFFYKNCFGYGVLHSNKIAMKTVVDTRKPSIAVTGMTMLYIGRM*TLD*KSD*VV*VGILWAILVARTLVLEKCRQVGDQHRKLQREKSYKVNTKQPSDHS*CISAKRWLLLPMS*KSARVFD**WQRRCQDSLELIISYGY**SLLFRSVMEKIKLDKKKYQMYRLRGKESTRECNGAKSSASRRLKFKEKFDTKWNQKSSNLR*DPTQLRFQLVKGN*RSLSSEGNYQEGKADANVNESEGQVQASKQLNLAALAKWFWP*SQGNQESKSLQYTKEWLFPHWLRKGAESRQVLWVLRTPCRC…	1.24918	1.57045e+06	error	116	39
EMBOSS_057_2	2	EMBOSS_057	ENSMUSG00000064263	ENSMUST00000079720	Medium	[A].VTLPDASVSPR.[R]	VTLPDASVSPR	TTTCAGAGATGCAGTGACTCTGCCAGATGCTTCAGTGTCTCCCAGGAGGCAGGTTTTGCAGTGCATGGAGAGGAACCAGCTGGCAGAGAAAGCAGGTTCAAGCTCAAGCAGCAATCAGATCATGTAGAATGACCACAGCCAAATGCACAAGCCCATTTGAGAAGCAAGGGAATGTCTTGTGTGATCCCAGAATCCCAGGTCCCGGGAAGACAGAAATGTTGCTGAGACCCCGTGGCAGCTTGGGTTCAAGCAAGACAAAGCTGCAGCCAACAGGGCTGCCATCTTCTCACTCTCTAAAGGAATGTGAGAGGGTGACCACCCTACAACCCAGGGAAATGGGTTCTTGTTCTAGCCTGGTGTTGGAGAATCACTCTCTGCATCTGGCCTGACACCAGCCAT…	FRDAVTLPDASVSPRRQVLQCMERNQLAEKAGSSSSSNQIM*NDHSQMHKPI*EARECLV*SQNPRSREDRNVAETPWQLGFKQDKAAANRAAIFSLSKGM*EGDHPTTQGNGFLF*PGVGESLSASGLTPAIHLQQQGNQEISWPAWPASEWNMQRR*LTADQHGRP*SRGQIAICFIKFVGGCRIYVCDLCLGVTMSLGRFGRLLNV*FVDX	1.66145	1.69082e+06	5	9	3.33333
EMBOSS_045_1	1	EMBOSS_045	ENSMUSG00000050936	ENSMUST00000051089	Medium	[V].KETAGGKMLWSR.[Q]	KETAGGKMLWSR	CCTTACGTTGCATCTTTAGACGCGGAGGAAAATGCCGGATCCAGCGAAGTCTGCTCCTGCCCCAAAGAAGGGCTCTAAGAAAGCTGTCACGAAAGTGCAGAAGAAAGATGGCAAGAAGCGCAAGCGCAGCCGCAAGGAGAGCTATTCTGTTTACGTGTACAAGGTCCTGAAGCAAGTGCACCCCGACACGGGCATCTCATCTAAGGCTATGGGAATCATGAATTCCTTCGTGAACGATATCTTCGAGCGCATCGCAGGAATGAAGACTCCCCACGACCACAGCACTCCTATCCCAAAAGGCATGTGGACACACGCTCCTCGTCACCAGCTGCATCAGACCCCTTCGGGATGCCTCGTTCTCAGCTCTGGAAACTTTGCACTAAGGATATACTGAGCTAC…	PYVASLDAEENAGSSEVCSCPKEGL*ESCHESAEERWQEAQAQPQGELFCLRVQGPEASAPRHGHLI*GYGNHEFLRERYLRAHRRNEDSPRPQHSYPKRHVDTRSSSPAASDPFGMPRSQLWKLCTKDILSYLPARSLARLTHPN*LRQCGNLRGGRVCWTEAVCAGHKGGRGSSLLLLALWRLPTRASG*AGL*IFSPAAAAAAASPKGDHQESLCGSSTALIRLAGWGE*FCSCAFAETASLS*CCARADAK*TIITKS*VCFGMGPFPIPEGIGHAPPFSTRCRRLSRDHSLLSAR*KQLIVRFEGD*KSTPRSVSGHGGLRALATMTQPHTACIVYR*PRDGASESLRPKVLFSLLLLCI*VGGLDWSLFSLPVKE*TAGGKMLWSR*QRDKSQ…	61.0511	806979	error	32	10.6667
EMBOSS_285_3	3	EMBOSS_285	ENSMUSG00000108867	ENSMUST00000208542	Medium	[R].KGKENVIMVSNAPG.[C]	KGKENVIMVSNAPG	GAGACAACCACGGCTAAAGAAATCTATTCACATATTTTTTTTAAAGTAATATCCCTGGTTGTTGTGTAGCTCTCAGCAAGGACCAGGTGCTTCCTGCACATTGACAAGCTGCTTCTTGGAGAAGAAAGAGTGCTCTGGAAATTTACAGATGAAAGGGAAAAGAAAACGTCATCATGGTCAGTAATGCTCCTGGTTGTTGTCTAGCTCTCAGCAAGGACCAGGTGCTTGCTGCAGATTGACAACAAGCTGCTTCTTGGAGAAGGAGTGCTCTGGAAATCTGCAGATGAAAGGAAAAAGAAAATGCCGGCAGAGACGGCGGCAGAGGCAGCGGCAGAAGCGGCAGCGCGAGCGGGAACAGCAACTGCTTCAGCAGCGCCAGCAGCAGCAGCAGCAGCAGCA…	DNHG*RNLFTYFF*SNIPGCCVALSKDQVLPAH*QAASWRRKSALEIYR*KGKENVIMVSNAPGCCLALSKDQVLAAD*QQAASWRRSALEICR*KEKENAGRDGGRGSGRSGSASGNSNCFSSASSSSSSSSSSSNSNSSNCCNCSCSSSASSSSSSSSSASSSSASSSSSASSSSSSSRSSNNSSSNSSSSSSSSSSSSASSSSSSSRGEGEKTGGAGGAGR	1.16168	1.68355e+06	51	149	50.3333
EMBOSS_011_2	2	EMBOSS_011	ENSMUSG00000086013	ENSMUST00000139612	Medium	[K].TVSLPMPR.[A]	TVSLPMPR	GCGGCCGCCCGCCCCGCTGCTGCTCCTCCGGGCGCGCGCGGCGCCGCCGGGGGCGGACCCCAGCCGCTGGCCTCGCGGTCCCTTGGCCGGACTGTCCGAAGCCTGCAGGCTCCCAACCCGGACCTCCTCTTTTTGTTTTGAGACAGGGTCTCTCTGTGTAGACCAGGCTGGCCTTCTGCCCGGATACCACATGGAGAGCCGCTTTGTAGGAAGTGCCCTCGCTCCACAGGACAGATCCGAGGAGACTTCTCAGGACGCCAGATGAAGGAAGAAATTTACGGAAAGGAAGAAATGGCGGCCACATTCACACTGTTAAGCTGAAGGAAAGATACTAACTCAGTATCTCAGTCTGCCTTGAGCTCCCGCGTGGCTCACAGTTCAAGAACATAAAGGCAAAAT…	RPPAPLLLLRARAAPPGADPSRWPRGPLAGLSEACRLPTRTSSFCFETGSLCVDQAGLLPGYHMESRFVGSALAPQDRSEETSQDAR*RKKFTERKKWRPHSHC*AEGKILTQYLSLP*APAWLTVQEHKGKILKFYAAFDHLLPYLTFVFHLDSWLLREWGGWPFPLRLSSKTVS*LPMPRASYIIGFKPCLNVSFLK*ELP*RASLGLQSPLSPRTLLLVFSRTLTTI*CFSISF*FSLVFVCFERVSMEE*AGLNQTHRTPPASAS*LLG*KAYHTMPGSLDFLNSSLFPQ*RINSX	0.824079	2.07136e+07	error	191	64
EMBOSS_217_3	3	EMBOSS_217	ENSMUSG00000097309	ENSMUST00000181277	Medium	[K].GNVLITLIGERFQG.[W]	GNVLITLIGERFQG	GTCTCCAACCTCTTCCGCTGCCTGCGCTCACGGCACTTACCTCCACAGTCGGGATCGGCGCAGTCAGCTGCTCCGGAGTCAGGCTCCCGAACTCCTCGGCTAGAACATCCATTCCATTCACGGTAGAGGAAGAAGTCGGCAGAATGTTCACATCCGCCCGTGCGGCTCCAAGCAAGTAGCACGCGGAGAGTGGTGTGCGTTCTCCTCCGGTGTCCCCGTGGCGCTTGTTTACGGGGAGGCGTTTCAAAAGGTTCCGCCTGGTCAGGGCCTAACCTGCGGAGGAACCCGGAAGTGACCGAGCCGGATGTGGAAAACTACACCCACTGGTGTACTTCCGAGGTCTCGCCGGGCTAATCCTAGCCTCTTGACAGGCTCATTTCCAAAGGAAACGTCAGAGGG…	LQPLPLPALTALTSTVGIGAVSCSGVRLPNSSARTSIPFTVEEEVGRMFTSARAAPSK*HAESGVRSPPVSPWRLFTGRRFKRFRLVRA*PAEEPGSDRAGCGKLHPLVYFRGLAGLILAS*QAHFQRKRQRDGVCYHYTE*TKDCT*SSHGSTDTYNPSI*KLEVGGHPEIQGHPWLPNKVEASLGYMKPCLQRKGNVLITLIGERFQGWQRRKHKNC*KLYSINF*KIRYTYKKSL*IVNTQLVEDKRICH*NWK*VHASPMVRKIPWEEEVKDANSF*MSFSLGTYKNCGDGWCHMSVYNAPGHLIVELFNSSPV*LAPSNNMCSFFFLNLVQGNLRTELAS*ISVLVSKRCADRLLKLSEERKKKITGHQDGSVC*VTCHKA*KAAFSPQDPHCR…	4.21591	3.82394e+06	197	144	48.6667
EMBOSS_377_2	2	EMBOSS_377	ENSMUSG00000115801	ENSMUST00000226445	Medium	[P].PEVLLSLR.[R]	PEVLLSLR	GAATTCTTTGTTCAGCTCTGAGCCCCATTTTTTAATGGGGTTATTTGATTTTCTGGAGTCCACCTTCTTGAGTTCTTTATATATATGGGATATTAGTCCCCTATGTGATTTGGGATAGGTAAAGATCCTTTCCCAATCTGTTGGTGGCCTTTTTGTCTTTTTGACGGTGTCTTTTGCTTTGCAGAAGCTTTGCAATTTTAAGAGGTCCCATTTATCGATTCTTGATCTTACAGCACAAGCCATTGCTGTTCTATTCAGGAATTTTCCCCCTGTACCCATGTCTTCGAGGCTTTTCCCTACTTTCTCCTCTATAAGTTTTAGTGTCTGTGGTTTTATGTGGAGTTCCTTAATCCACTTAGATTTAACCTTAGTACAAGGAGATAGAAATGGATAAATTCG…	NSLFSSEPHFLMGLFDFLESTFLSSLYIWDISPLCDLG*VKILSQSVGGLFVFLTVSFALQKLCNFKRSHLSILDLTAQAIAVLFRNFPPVPMSSRLFPTFSSISFSVCGFMWSSLIHLDLTLVQGDRNG*IRILLHDNRQLCQHHLLKMLSFFHWMVLAPLSKIK*P*VCGFISGSSILFHWSTCLSLYQYHAVVITIAL*YSFRSGMVIPPEVLLSLRRVFAILGFLLFQMNLPIALSNSLKD*VGILMGIALNL*IAFGKIAIFTMLILPIHERGRSFHLLRSSLISFFRDLKFLSYRSFTYLVRVTPRYFILFVTIEKGVVSLISFSACLSFVYRKAIDLFELILYPATSLTLFIRLRSSLLEFLGSLIYTIISSAKSDILTSSFPICIPLISFC…	7.81892	4.55215e+06	213	35	12
EMBOSS_328_1	1	EMBOSS_328	ENSMUSG00000113529	ENSMUST00000222984	Medium	[K].NNQAWYMPTIPGLRRQSP.[R]	NNQAWYMPTIPGLRRQSP	CAGGAAGTTTGGCCGCCCCCCATCAACATACCCACTCGCTTTCTTCTCCGCCCGCGGGTGTTTCTCAGGAGGAGGCGCTGACTCTTGGGCCGCTGCTTGAGAGCGATCCTTCGCTCCCCGCTACATACACACGCATACACAGCCCGAGACACACACAGGGTTCCCTCCCGGCCGAGGAACCGCAGCGCCCCGTCCCCTCCTGTCTGCCCTTCAGGGTTCTCAGGTCCGCGAAATCTGAAACCAGGTCAGTGCAGTCTAGCCGTGACGTCACTGCCTTCCCGCTGAGCGGAGCTGTTCAGCAGGGGCCGCGGCGGCTGGGATGGGTGAGACGGCGCGGGGTGGAGGGTAGCTTTCTCCGGAGCTGAGGACCTGTGACAGCTCCCGAAACACCAAAAGCCC…	QEVWPPPINIPTRFLLRPRVFLRRRR*LLGRCLRAILRSPLHTHAYTARDTHRVPSRPRNRSAPSPPVCPSGFSGPRNLKPGQCSLAVTSLPSR*AELFSRGRGGWDG*DGAGWRVAFSGAEDL*QLPKHQKPMKST*NVHGPKRDLEIKPCIAPRTGCEFRHTYSVRNI*EFSRDLGCTD*GLR*LSSKLDNSSC*NFRV*LHET*DLQWWHTPVTPAIPVLQEFPVNEGYIVETLSKKTKNNNNNKT*CGVEE*GTKDSACEI*CSLKALIFKLEISQESG*ARES*FWYKMFREKTFPRYSLSCALRSMTVIPFEDGHDKDNWPTQYLGQKSWGGKEMFTRS*NPKI*ERIKKQRFTSYHYMKR*RTVQKEKLGSRESM*NKVRTLQNLI*WLLIC…	1.04946	4.60647e+06	error	320	106.667
EMBOSS_319_2	2	EMBOSS_319	ENSMUSG00000115092	ENSMUST00000227784	Medium	[E].LRECAWQQAQGGHDITLK.[E]	LRECAWQQAQGGHDITLK	GGTTCATCTATGAAGCAGCTGGCTCCAGAACCTTCTGCCTGCCTAAGGCCGAATAATGCTCTGCTTCTGAGTATGCTGACTTGGGTTGTCTGTTTACCTCACTGCTGGCTGCTGGCTGCTGTCCCCCTGGGAGCTCCCTGCTTGGCTGCTGTGGCTAATGCTGCCAGGAGGAGCAGCGCTGTTTTCTGTGGACCCTTGTCTAGTTGTGGCGGTTGCTGGGAAAGATGAAGTCCCCAGACTGGAGCTCAGGCTGCAAAGAGGCTGGCATGAAGCGAGATGCCCCTTCTAGGCCAAGGCAAGATCTGCTGCCCTCTGACTTCTACCTGTTGCTGAGATGACTTCTGTCGCCAAGGCACCTGGATACCGAGCCACTCCTTGACAAAAGCCCTCTCCAGCCTG…	QNLLPA*GRIMLCF*VC*LGLSVYLTAGCWLLSPWELPAWLLWLMLPGGQLSKNLSLQALLPVPQAPHPEAGEEP*EQCPLCSQTLFIMAPMTLDFHLCCVS*PARGLQLHLLSGCCVRRKNGPLQGHSYRPGVPGETDSANVCQLRARSRMWPLWSSLVGSPRCIMEGVPHALRQFLPRRGSAYWCGQDHVCVCARARACARVRVRVQRPRQ*ETQLRLPTDF*AKQSDALVTVSGTQE*LWQWVLLLRQRHGGGGGEEEGQQEVENNFGFEASSI*QKAELRECAWQQAQGGH*DITLKELQCGSARQPGPPAQLLAVPIRHLGLILVWGWGGGGREVSLQICMIK*QRKALDPPRPAMIPHSVSF*THLTLKSPQLG*FTTC*CDCFKLHFSVCFL…	2.46079	8.66829e+06	error	10	3.66667
EMBOSS_043_2	2	EMBOSS_043	ENSMUSG00000087679	ENSMUST00000133808	Medium	[T].PRARPGSALPSGPEPAGGNR.[A]	PRARPGSALPSGPEPAGGNR	GCGCGCACGCTAGTGCGCGTCCTCGGATAATGAGGAATTCCTGGATGCTCCGCGCGGGCCCGCGGTGGGCGCTGCGAGGCTTCACCGTGTCGTCGCGGGCGGAGGGGGCGTGAAGACCGTGCTACGGTGGCCGCCGAGGGACAACACTACGGCTCCCACGCTGGGACAAACGCCTCGGGCCCGGCCCGGGAGCGCCCTCCCCTCCGGGCCAGAGCCAGCCGGGGGCAACTGAAGGGCCGCGCGAAGCGACCCCGTCCTCGGCGGCATGTGCCCGCCTTGGCGTCGCACCCCCGGGGCACAAGCTCAGCCGCAGGCCCGGTCCCCAGCACCGTCGGCCCGCCGCATGGTTCCGGACACCGGCACCGCCACGGAGAGGGCACCGGGCCAGCACCTCCCCCA…	RAR*CASSDNEEFLDAPRGPAVGAARLHRVVAGGGGVKTVLRWPPRDNTTAPTLGQTPRARPGSALPSGPEPAGGN*RAARSDPVLGGMCPPWRRTPGAQAQPQARSPAPSARRMVPDTGTATERAPGQHLPQGSAEGS*TLMTPMLAIRTLHRHCKTALPPRPNAGHAHPAAGALLPRPAHHLPARSLRTAENLSPGSHQVQQLRCLCQDPLALWLYTLPALLQLQPLHSGPLGRAGRALLPTVPGCPRTAALPAQAVSAAAAAGAQARGLPPHERAAYLWHPCDHAAGWGAGLVLHGLCGHVRAHPPWGS*LCHT*LLSWRVGLVGAFFFFFFFFFLPHPGGKA*STHSH*GEKRAETTL*WEQHTVSLLASALSLLCTLPDVLSPLASCLGLPVCF…	6.52645	733419	error	30	10.3333
EMBOSS_179_1	1	EMBOSS_179	ENSMUSG00000097367	ENSMUST00000181048	Medium	[R].YIKYSNSLHLQKMLTTTSK.[L]	YIKYSNSLHLQKMLTTTSK	AAGTAAAATTTTATTACATACTTATTCCCAAAGAGGACAGAGAGGTACATCAAATATTCCAACTCATTGCATTGATTACAGAAGATGCTCACAACCACTTCATAGAAACTGTACTTGGGTTTTTGAGGGGGCGAGAGGGAAGCAGGTATGGTAGTATATACATGCAATCCCAACATTTACAAGATGGAGAAGGGTCTCAAGTTTGAAGCCAGCCTGGGCAATAATTAAGATTCTGTCTCAAAAAGCAAAACCAAAAACCACATACATAAAAGACAGTTTTTTTCTTAAGTCATCAGACTATCTGGAGTAAACACATCATTTCTAAATAACCTACAAGTCCAAGGTTAACAGTAGCCAGTAGCAAACTAAGATGGAACTGTTGAACAAGGATATTTTTCT…	K*NFITYLFPKRTERYIKYSNSLH*LQKMLTTTS*KLYLGF*GGEREAGMVVYTCNPNIYKMEKGLKFEASLGNN*DSVSKSKTKNHIHKRQFFS*VIRLSGVNTSFLNNLQVQG*Q*PVAN*DGTVEQGYFSGSLNITQAG**LLILLLPPKC*NYKYMLPPLSVSGG*IFASKEALTGLSPTCLIQTTVFLQGHFFHGFYLSYRKPAPLSFIQMQ*T*DLLIELRSWFSKQETT*KSLINKQPKVLDCSI*NVMSPVNHHTTSQVSARCYGLLGWSTVIT*CSTARPVPITGLPST*EGSCHTS*GCAGGNGKGENFHKGRLTPKLPSSA*ARTKAPKCDI*DNMKPQHSCGRQGKMCLVALAL**SSLDVNSSSPDSTFLFFRLMSDSGSRLSQLV…	10.236	5.37559e+07	error	85	28.3333
EMBOSS_139_2	2	EMBOSS_139	ENSMUSG00000097818	ENSMUST00000180851	Medium	[K].QGFLMKRWGTQGVSGWMLT.[T]	QGFLMKRWGTQGVSGWMLT	ACAGAGGCAAGCAGAGGTGACTTGGGGAGGTCCACCTCCTGTCAGGGTGCTATGCCTGCATGGGCCAGTAGGTTCTTCCAGACCTAAGTACACAGAGAGAGAGCTGTGTAACTCTCAGGGAAGCTCCTTCCTCACTGTCTGAGAGTTTCCTATTCTGGCTATGAGCATTCCCTACGCCCCTCACCACACAGGATCTGCAGAGACACAAAAGGACCAGGTATTTTCAGCACCTGTGGCCACACACCAACTCAGGTGGAACCACCCTGACCCCTGACGTGCGAGGGCTACGCAGCAGGGTCGGAAAGACAGCCAGTTGAATGGACCGAGAGCGCAAGTGACCCCGAGGCCTCCCCCCGGAGCTGTCTCCGGGCCCAGGGAGGTATCAGGCATTGGAACTGC…	QRQAEVTWGGPPPVRVLCLHGPVGSSRPKYTERELCNSQGSSFLTV*EFPILAMSIPYAPHHTGSAETQKDQVFSAPVATHQLRWNHPDP*RARATQQGRKDSQLNGPRAQVTPRPPPGAVSGPREVSGIGTAPRGTPSLARVGRPTVVSPPGQAHFAGPAYPARLPRPRRRGSGVAGGRQRPHTARPALQRRSASTEP*RVEANPSRRREAVSAYVHFASPGGQDGVDARVPWRLPATQAQ*PCALWVFIFLSASRGLWSSCLSWILLTSPEVWEEQSLVLTRVGVTSISSITSSFCRLSSCIPPHPSCFFYFQGNS**DMHSQ*RMRCYQASFILGHIF*CLPRSHKVVSS*LQRDSGCMSLIHLSEYLPSCLFPTEPGLRFFLPT*WHLYIGVQDT…	2.82267	678206	417	52	17.6667
EMBOSS_136_3	3	EMBOSS_136	ENSMUSG00000097767	ENSMUST00000182953	Medium	[K].CWAPQTLRLGR.[K]	CWAPQTLRLGR	TTTCACAAGTTTTGATCCAGCGGCACTATATTGGGGCTTAGAAGATGACAATTACATCATGGTCTCAAAGGTGTGGATGGCGCTGGTCTGGAGCATCACAGAACCAAGGTTTTTAGCGACTCTTTAGCATCCCTGTAAAGCTCGTGATGGTGCCAAGGAGTGCAGGCAGAGCAGATGCCAAAATTAGAGACCTCTGCCACAGACTTGGGTTCGAATCTTGCCGCCGCCCTGACCAGGACTCTTCCTAACAGAGTTCCTCGGCAACCACGCCCCGGCCCTGAGAGCCAAGCACGGATACCGGGTCCTCTTCTGGGATTCTAGGCAGTGCTTCTCGCTTAGGCGCCAGGTCCGCGATCGCGCCTCCGACCGTCGCGCGCCTCTCCACTGGCCAGCGTTGCT…	SQVLIQRHYIGA*KMTITSWSQRCGWRWSGASQNQGF*RLFSIPVKLVMVPRSAGRADAKIRDLCHRLGFESCRRPDQDSS*QSSSATTPRP*EPSTDTGSSSGILGSASRLGARSAIAPPTVARLSTGQRCYGSAAGGGC*G*GSQ*PLCEARERCAPHISLLESWSARWVLVRVPHPTPTPEAGCGNSARQPLLH*NFMGAAVNAKTTPVALGGRREGGCGPERGGVCEGRRLGGLPQFC*ELGTKSPLHSSRRSEEEPS*MHMGVGTPVQHQPTRPGASSAASNPGHLCTLIATSLWMLFAYPWGVTALAQQSCEVLEFRLFSSHGHG*SVSVVPGGKAGSRAVEANIVTKLALSQHRD*AF*ASRVPAGSQVVEEWRDLGKVTTSLQSSLADKYH…	0.999065	1.74535e+07	error	45	15.6667
EMBOSS_323_1	1	EMBOSS_323	ENSMUSG00000100306	ENSMUST00000187898	Medium	[R].ELEFMQVLTSLLSSWVN.[C]	ELEFMQVLTSLLSSWVN	GGCATATCCGTAGACCTTGCTTGACTCTTGTCTGTGGCCAAGCAAGGGGGACAGAGTATGCGAGAGTAATTGGAGTTCATGCAAGTTCTAACCAGCTTACTCAGTAGCTGGGTGAATTGCAGTACTCCAACAT>ENSMUSG00000097180|ENSMUST00000197551TTCCGCCGCGGCGCGCTCCTGATGAGTGCTGTGTCCAGGATGATCATGAATTCAAGCTCTGGAGCTTGAGATGAACTGGTCCGACTTCTAGAAGAGAAGGTAGGCATCTGTGTGTAGAGTCAAGGTTTTAGGTTACCTGTTCCCCTTCATATCGGGAACGGGTGAATTCTGAGGCATTCTCATTGTATATAGAGAGCATGAGAATTTTGTGTCTGTAGAACGAAGTTC…	GISVDLA*LLSVAKQGGQSMRE*LEFMQVLTSLLSSWVNCSTPTX	1.92965	48088615	error	58	19.3333
EMBOSS_240_1	1	EMBOSS_240	ENSMUSG00000097928	ENSMUST00000181702	Medium	[Q].APPSHPPPRLAPSLFPHHTPTPR.[R]	APPSHPPPRLAPSLFPHHTPTPR	GCACTCAATCAGGGCGATCCTAGGCTCGCACGGCGGCTGTCCACCGTTTCCCTCCGCCCACCGCGCCGACGCCCGGGCGCCCACGCCACCCTTTCCCCGACCACCCTCTGCGCAGCCCGGGCCCAAGCGGCGGGACGCAGGCTCTCGGACCCGGAGCCGGTTCCCGCTTCTCTCGCTAGAGGGCAGACGGGGCCCGCTCAAAGCCCTCAGACCGAAGGGCACGCGCAGCCGGTAGAGATCCCGCAATCGGAGCCGCACTCCGGGGCTGGGCTCCGCGACCAACGTGGGGTCCGAGATCAGAGCCCGGGAGCGCGACGCACGGCAGACCCAGAGGACCCGGGAGGAACGGCCAGCAATCTCGGGGTGCGCACAGCGCACGGGCACCAGGTGGAGGCGGCG…	ALNQGDPRLARRLSTVSLRPPRRRPGAHATLSPTTLCAARAQAAGRRLSDPEPVPASLARGQTGPAQSPQTEGHAQPVEIPQSEPHSGAGLRDQRGVRDQSPGARRTADPEDPGGTASNLGVRTAHGHQVEAAPARQFGDPVGRQESCARTHGTRLGARLGAAERLALTWARVAFGGRGLPAGSPVLLLALPLASAFFALRHLAKDERSTRTRLGDGDARQVWSKGLQKSLSREGRASGRAARGRRLSPAGSGVDSITWSARYVWGCLGATLVSRVLPLPALEWPRSGGCLAPLQPEEGKVLTVRSMLASPGSCRRCAAFRSCCRRGPEFPQVLGKS*PALFQLPASWTQAPPSHPPPRLAPSLFPHHTPTPRRRHATGRSLSWAITAQPLSSGSWASL…	1.41752	842231	351	617	205.667
EMBOSS_171_3	3	EMBOSS_171	ENSMUSG00000097207	ENSMUST00000181209	Medium	[N].LSTQQGIR.[L]	LSTQQGIR	AGGCGGCGGTGCTCAGTGGTCGGTTACTGAGGGGCCTTGTGGCAACAAGGTGACATAGGACAAACAGCACTCAGGTGAGCACCTGGAAAAGGCTGTTGAAGCACACAGGCACTAGAACTACTTTATGAGCATAATTCCTTGGACCATAATCGTCACCTGAGGAAGCCGCGTGAGACACCAGTCTTAGGATTCCAAAGTGAAGAGGAACGTGCCCTCCTCGATGAACGCCTGTGGAAGCCTTTGAGCAGCCCTTTCATGGCGGAAGAGAGGGCAACTCTGAGGTGATGGAGCAGCGGCTAGGCAGAGGGCTGCTGAGGAAGCAGAGGGAGGATCGCTTCAGCTCTCGGCAGGCTGGAGCCTCAGAGCAAACCTCAAGTAACTTTCTGTGGATGCTGTGAG…	AAVLSGRLLRGLVATR*HRTNSTQVSTWKRLLKHTGTRTTL*A*FLGP*SSPEEAA*DTSLRIPK*RGTCPPR*TPVEAFEQPFHGGREGNSEVMEQRLGRGLLRKQREDRFSSRQAGASEQTSSNFLWML*GFPLL*RVTTTKATLTKDNI*LGLAYNFRGLVHYQLGRKHGGVQANMMLEKELRALHLDPTASKRRLTVSQAPRRRESKPTPQ*NTFSNKATPPNNATPWAKHIQSTTPSLGTHFHK*ECRGSVRTESDFRCRYCHSKDHAPDGYSITTCLKDTDIDTLWEFYILYMRIPSSHLTSIPSSPPLYLANYLYLSVYF*KLLCNTFTLMW*LPSNIGTDYKPCLGHEDSQYPVQINDFPFSLMLA*SC*SPLNLILTRYMHANWLL*IYF…	6.81367	5.14062e+06	698	125	42.3333
EMBOSS_136_2	2	EMBOSS_136	ENSMUSG00000097767	ENSMUST00000182953	Medium	[R].KGAVDKETGGSQAEPP.[Q]	KGAVDKETGGSQAEPP	TTTCACAAGTTTTGATCCAGCGGCACTATATTGGGGCTTAGAAGATGACAATTACATCATGGTCTCAAAGGTGTGGATGGCGCTGGTCTGGAGCATCACAGAACCAAGGTTTTTAGCGACTCTTTAGCATCCCTGTAAAGCTCGTGATGGTGCCAAGGAGTGCAGGCAGAGCAGATGCCAAAATTAGAGACCTCTGCCACAGACTTGGGTTCGAATCTTGCCGCCGCCCTGACCAGGACTCTTCCTAACAGAGTTCCTCGGCAACCACGCCCCGGCCCTGAGAGCCAAGCACGGATACCGGGTCCTCTTCTGGGATTCTAGGCAGTGCTTCTCGCTTAGGCGCCAGGTCCGCGATCGCGCCTCCGACCGTCGCGCGCCTCTCCACTGGCCAGCGTTGCT…	FTSFDPAALYWGLEDDNYIMVSKVWMALVWSITEPRFLATL*HPCKARDGAKECRQSRCQN*RPLPQTWVRILPPP*PGLFLTEFLGNHAPALRAKHGYRVLFWDSRQCFSLRRQVRDRASDRRAPLHWPALLWQRRRGGMLRLRLAVAPL*GAGEMCTPHLFA*VLVRKMGACSCAPPHPHARGRVRQLRPPAAPALKFHGRCSKREDDAGCAGGP*GGRLRTRAGRSLRGEALGRTPPVLLRAGHKEPFALQPQERGGAELDAHGRGDSGTTPTHKTWGVQRSLKPRASLHSHRDVALDAVCISLGSHCFGTTVLRGAGIPSVLITRTWLICLSGTWGQSREPGGGGQHCYQVGSVSTQGLSLLSLKSSCWFPGGGRVERFGKGHD*PAKQPCR*VS…	0.999065	1.43431e+06	error	45	15.3333
EMBOSS_110_2	2	EMBOSS_110	ENSMUSG00000093846	ENSMUST00000172838	Medium	[K].RADTQSPPLS.[L]	RADTQSPPLS	GAGGCGTCCCGGACAGCGGCTTGGTGGCGCGTAATTCCCAATGACTGTGCGCGCCCGCGTCTGGGCTCGTTTGCCAAGGACTCGGAAGCTGCAGCTCCCAGAGCACAGCGGGCAGAGCTGCGGGCTGTGCGCGCCCCTGCTGCCCCGGGCCTCCAGGGGTGGCTCCCGCGCCCCGCGGCGACTTCCGCGCCCGCGCTTCCCTTTGTTCAAGTCCCGGAGCGGCGTTGGGGTCCGAGCCCGTGCCCTGGGCGACTGAGGCGGCCGCAGTCCGCGCCCCGGCGCCCTGGCGATGCCAGAACAGATCTCCGTGTCGGAATTCATAGCCGAGACCCTTGAGGACTACAAGGCGCCCACGGCCTATAGCTTCACCACGCGCACGGCCCAGTGCCGGGACACCAT…	RRPGQRLGGA*FPMTVRARVWARLPRTRKLQLPEHSGQSCGLCAPLLPRASRGGSRAPRRLPRPRFPLFKSRSGVGVRARALGD*GGRSPRPGALAMPEQISVSEFIAETLEDYKAPTAYSFTTRTAQCRDTMSAIEEDAVTYDDVHVNFTGEEWNLLDPSQKSLYKDMMLETYWNLTVIGYTWENHHIKRHCQSSRRNESPSSLPGFQNAFLG*NPGCDLLARHNIWRTSGGLRNGKGILEEALLVWSSME*LKDKGNSYRRRFHHLPAL*PHGCQIRTPGSY*IWGL*NTLRKYGQGGARGIRGQ*SWSVYIVEDMHL*TQNMQLKA*MLCRL*PE*GQ*CPCYRCPILVEGVDQMAQGMSLCLSLNVSMSLKLP*NKVS*KYIWDPRS*RGLPPHR…	2.25443	6.63941e+06	633	41	14
EMBOSS_197_3	3	EMBOSS_197	ENSMUSG00000097651	ENSMUST00000181967	Medium	[R].NSLVSKPKSKGSFIFIPGSHTQHR.[A]	NSLVSKPKSKGSFIFIPGSHTQHR	AGGAGAGGAGATGGAATTTTCCAAAGTTCCTGAGTTGACCTCTTCAGTGCCAGGCATTGGCATTGTGGAGATGAACTAGGCAGGTACTCTCCCTCAAGTACTTCCCAGCCCAGAAGGGGACAGGACCACACCTGAGGACTATCCTAAAGATCTGAACAGTGGAGACAGAATGAAGAGAGCTTGCTTGGACAGCTTTATGTAGCAGAGCTGGTACAAGTGACTTAGGCCTTGAAGGGACTCCTGAGCATCATTCAAGGAATTCTCTGGTCTCTAAACCCAAGTCTAAAGGCAGCTGATTTATCTGATTTATCCCTGGGAGCCACACCCAGCACAGGGCCAAGCACAAACACAACATCACATGAACGAGGACAGTGAGTCACTTGGGATATGGAGAGACGC…	ERRWNFPKFLS*PLQCQALALWR*TRQVLSLKYFPAQKGTGPHLRTILKI*TVETE*RELAWTALCSRAGTSDLGLEGTPEHHSRNSLVSKPKSKGS*FI*FIPGSHTQHRAKHKHNIT*TRTVSHLGYGETQEDQKFEATLRNTASLRAARATHASYQERMKPMFPLYPKIGCQAHPRMCPVTPH*KTLTLSMIASRSLIYTQGWEPHHCGLYPSWRPSHSLTRPLTHSVTLGSH*TDLVSLP*NGLMVASPPRAWQKG*N*YVLNAIDYIKLLYVKDMX	5.40187	1.36057e+06	error	11	4.33333
EMBOSS_285_2	2	EMBOSS_285	ENSMUSG00000108867	ENSMUST00000208542	Medium	[C].QQQQQQQQRR.[R]	QQQQQQQQRR	GAGACAACCACGGCTAAAGAAATCTATTCACATATTTTTTTTAAAGTAATATCCCTGGTTGTTGTGTAGCTCTCAGCAAGGACCAGGTGCTTCCTGCACATTGACAAGCTGCTTCTTGGAGAAGAAAGAGTGCTCTGGAAATTTACAGATGAAAGGGAAAAGAAAACGTCATCATGGTCAGTAATGCTCCTGGTTGTTGTCTAGCTCTCAGCAAGGACCAGGTGCTTGCTGCAGATTGACAACAAGCTGCTTCTTGGAGAAGGAGTGCTCTGGAAATCTGCAGATGAAAGGAAAAAGAAAATGCCGGCAGAGACGGCGGCAGAGGCAGCGGCAGAAGCGGCAGCGCGAGCGGGAACAGCAACTGCTTCAGCAGCGCCAGCAGCAGCAGCAGCAGCAGCA…	RQPRLKKSIHIFFLK*YPWLLCSSQQGPGASCTLTSCFLEKKECSGNLQMKGKRKRHHGQ*CSWLLSSSQQGPGACCRLTTSCFLEKECSGNLQMKGKRKCRQRRRQRQRQKRQREREQQLLQQRQQQQQQQQQQQQQQQQQLLQLQLQQQCQQQQQQQQQCQQQQCQQQQQCQQQQQFQQEQQQQQQQQQQQQQQQQQQQCQQQQQQQQRRRRKNRRSRRSGKX	1.16168	4.73511e+06	203	149	50
EMBOSS_405_3	3	EMBOSS_405	ENSMUSG00000093908	ENSMUST00000220896	Medium	[T].QRMSQQSVLHR.[S]	QRMSQQSVLHR	GACAGTGGCTTGGTGGCGCGCAGTTCCCCTTGACTGTGCGCGCCCCCGTCTGGGCTCCTTTGCAGAGGAATCGGTAGCTGCAGCTCCCGGAGCACAGCGGACAGAGCTGCGGGCTGCGTGCGCCCCTGCTGCCACCGGGCCTGCCGCGGTGGCTCCCGCGCCCCGCGGCGACTTCCGCTCCCGTGCTTCTCTTTGTTCAAGTCCCCGAGCGGCGGCCGGGTCGGAGCCCGCGCCTTGGGCGACTGAGGCGGCCGCAGTCCGCGCCCCGGCGCCCTGGCGATGCCGGACCAGATCTCCGTGTCGGAATTCGTGGCCGAGACCCTTGAGGACTACAAGGCACCCACTGCCTCTAGCTTCACCACCGGCACGGCCCAGTGCCGGAACACCGCGGCGGCCATC…	LCRGIGSCSSRSTADRAAGCVRPCCHRACRGGSRAPRRLPLPCFSLFKSPSGGRVGARALGD*GGRSPRPGALAMPDQISVSEFVAETLEDYKAPTASSFTTGTAQCRNTAAAIEEV*SPLPAAMDKQNSKLGPEVLQDLQNHREFTDHELQEWYKGFLNYCPTGHLTVDNFKI*ANFFPYRDASKFAEHVFHTFDTNSDSTINFRVFIIALSMTSRGKLEQKVKWAFSMSDLDSNGYISCSEMLEIVQVPALDRAWSMGSAGVQDPHPRPHTPG*VIPLPTCYLVY*RTACLCRE*Q*KPASLDCLLDIRPQLSSSIRFFHTILSNGSFIFNL**DLRLR*VIKNCQSKNLENGSVGKNT*YPA*GPDF*SQHPRKSQEWLSVPETLELGDK*VPEAC…	4.37189	1.10687e+06	error	280	94
EMBOSS_088_2	2	EMBOSS_088	ENSMUSG00000073155	ENSMUST00000152147	Medium	[G].PQVCTMVSSLVRNVFNK.[I]	PQVCTMVSSLVRNVFNK	GAGCTGGAGCTGGAGCACCTCTCACACCCTCCTCGCCCTCCCCACCGACATCATGCTCCAGTTCCTGTCCTTCAAGTTCCGAAAACTTTGGGGTGTCAGTGATATGACTGCGTTTTCAAAAAACCACTTACTGTGAGCTCTTGGCGAAATCTTCGCGCTTGGATTTACTTTGGGCAACGTGGTTGGAATGTATCTGGCTCAGAACTATGAAATGCCAAACCTGGCTAAAAAACTTGAAGAGATTAAGAAGGACCTGGAAGCCAAGAAGAAGCCCCCTAGTTCCTGATGCCTGCCTGGCACTGCAATCTGGACCCACCAGTTCCATCCTGGGGGGCCTGTCTCCTTCACAGCCACGTCCAAAGCTGTGTTCCTCTTTGGTCTCAGACCCTGCGCGTTGCT…	GRKPEPGSGFRPRAGEESRSRAGAGAPLTPSSPSPPTSCSSSCLDLLWATWLECIWLRTMKCQTWLKNLKRLRRTWKPRRSPLVPDACLALQSGPTSSILGGLSPSQPRPKLCSSLVSDPARC*GSSTGQKWS*LSVSSISPFPYLPSTCF*DLSLEPWC*VSSRNHDRTHSPVLWDSYRLLSRNEWIWIAAGDSLSSSDNRSLLDKLNCVKVIKVSIFKPVSGELIHLLYIVTKELHG**FNQ*IICWSLTRKLFYAFYKKQTNWENLKHAK*LLSSYSSVYAVYVFP**YI*TESAVKEPFFMLALDRMGG*MRSC**NNVTFFFLNIKMYPNYITS**TP*EKCGANVW*SESLWDLGSDASPTPAPHPHPHPPPAPG*GILPGSRTDHQASATSF…	7.60156	1.33311e+07	error	53	18
EMBOSS_379_2	2	EMBOSS_379	ENSMUSG00000104222	ENSMUST00000194706	Medium	[T].VLTNIWSIMFRSAQR.[M]	VLTNIWSIMFRSAQR	GAGCCCTCGCCCTCGAGGCAGCCACCGGCTAGGCCACGCGGCCATTCCGCAGCGACTCTTGCCCTGCCAACGATGCGCCTGCATGGCGGCGGCCTCCCCGACTCCACCGGCGCCCTCTCTCCAGGGCCGGGCCCACCGAGGAGTCCCAGCCAGGCCTTCGAGGACGCCTCGAAAGTGGCGGCGAGCGTGGCATGACGGGAAGAATGGCATCCACCTGAAGGCCAAGGCTGGGCCTTCGGGGCTTCTGCGGCCTAAGGCGGCGGGTCTGAGCAAGAACACTCTGCCATCGCCGGCTCGGGACGGGAGGCCCACCCGTGGCCGAGCACGCAGACCTGGATGAACCGAGGCCTCGATGGGCCTGGACGAAGGTGAGCGGGGCCCCGAATCACGGCGAGAGGA…	VPAESAASSGVWPSSPRAPHGLGPLRVSPRGPGAASVPTLRTPGALALEAATG*ATRPFRSDSCPANDAPAWRRPPRLHRRPLSRAGPTEESQPGLRGRLESGGERGMTGRMAST*RPRLGLRGFCGLRRRV*ARTLCHRRLGTGGPPVAEHADLDEPRPRWAWTKVSGAPNHGERNDRFLGRGSSLHPREAETRQPQAAIRKRCRRRSPVYII*KSCSQPFPRPFLDFWLNLDV*L*RLPTQGKGEVGDDVNTQSP*KEDRGHVFCK*F*NGIV*AASRKTQHSSLFVQYLRGSSRRRKRPGARLVV*RRRVSLFYPIVLCMHFSPHFLPPTPCLRVCLCVCI*VCLKMPGFGGNVFLAALKCLPYFISSKTCCKYLFVRIHLNYCLEKKSQTSPELT…	11.6972	2.65792e+07	error	73	24.6667
EMBOSS_145_1	1	EMBOSS_145	ENSMUSG00000096980	ENSMUST00000181075	Medium	[R].TNPQGSKLQ.[G]	TNPQGSKLQ	GAGGGGGAGGTAATCAGAATACTATTTTTATACAGTATTGAAAAAAATACATTTTTTTATTGTCTGAACTCACAATCACCACCCAGCAGTTCACGCCTGCTCTAGGTAGCACCCACATGAAGGCTATAGCATGAGCAAAGAACTAATCCGCAGGGAAGCAAGCTGCAGGGCCAGCAGAAACCCTCCTAATCACACAGAGGACAGCAGGCCACGTAAGCAGGTACACAGCACACAGCTAAAGCCACCTTTCAACAAGCCAGGGTGCCAGAGGACATGAACCAACCCCAGCACTACAAAACTGCATGTTCCCCAAAGAAACCTTTTGCTTCATGCCCGTAATTAACATAAAATAAGTAAATTATTTGTCTTTGTATTTAGGAAAATAATCACGCTAAAAGT…	EGEVIRILFLYSIEKNTFFYCLNSQSPPSSSRLL*VAPT*RL*HEQRTNPQGSKLQGQQKPS*SHRGQQAT*AGTQHTAKATFQQARVPEDMNQPQHYKTACSPKKPFASCP*LT*NK*IICLCI*ENNHAKSCTLYGFSKERLIVLFELKKKDRCLPTSLT*PLWNIALLN*KHTSKERLVQWDIQNVFRSYDWLLLLFWFCQKEYRAELLSTLSPNSLQSQV*NCWAHWMAVSRQHGPGTSSHLTGCYLGGSKCPLNLPP*QFSKVVLPHLRPLWYKNFRLFQLLPIANLGCSGSQTPNLPTPVSSWQLPGELRLEVKGRTGAQAMGPVFLHLMVH*ALSREETVPW*VKIKSVTCLGTIHTN*EKRNTKQKTKTASSFTAQSRQWINRPRARIRCH…	8.1879	1.22152e+07	48	117	39
EMBOSS_291_3	3	EMBOSS_291	ENSMUSG00000115871	ENSMUST00000231018	Medium	[R].RSEGMKIR.[N]	RSEGMKIR	TTTCTGTTTCCAAGATGCCTTTCCAGACTAGAACCCAGACATGTGAGCCACTGGCCAGACACAACATCTGGTGCCCACATGGGACTGAGAAATGGCAGAGGACATTTGGAAAAACACTGCTGTTTTGGAGTTCCATAGAAGAAGAGAATAATTAAAGGAAGTTCATACCAGAGAAGGTTTCCAAGATGCCTTTCCAGACTAGAACCCAGACATGTGAGCCACTGGCCAGACACAACAGTGCTGGAGGAGCTGAGAATTCTTATTGACCTGAAGGCTGCTAGAAGAAGACCGGCAGCTAGGAGGAGAGTTTCAAATCCCACCAATGTTGACACACTTCCTCAAACAAGGCTCCATCTACTCCAACAAGACCGCATACCTGCTAATATTGCTACTCTCTGG…	SVSKMPFQTRTQTCEPLARHNIWCPHGTEKWQRTFGKTLLFWSSIEEENN*RKFIPEKVSKMPFQTRTQTCEPLARHNSAGGAENSY*PEGC*KKTGS*EESFKSHQC*HTSSNKAPSTPTRPHTC*YCYSLGQISSNHHKDIQELWLMTLLFQAS*YCSQRTNPAEVLLWLTVTFGS*LTT*KCCGERRWGRPILKKEWNNFR*SCKAE*LKSEPSLPPTYVVADLNATLEDWPLFRTLKIQPGSSQCRHQSTRGIRARINPPTLERCLKQLLSGVSLLVHGSWQFTQS*KFGRIWGCFR*VPTLPSSSGNTRGTPSSYYSFPLSIHSLHRNPPCDFNTLSWETQAQSGLYRGLRADCGSWSMFPIRSAWTF*I*KSFAFLWRAWKKWKLQCRFINQR…	0.986698	2.62952e+06	589	15	5.66667
EMBOSS_177_1	1	EMBOSS_177	ENSMUSG00000097681	ENSMUST00000180854	Medium	[K].TQLIPADLMGLSLLPE.[F]	TQLIPADLMGLSLLPE	ATTCGCTCCACCACCCAGGCCTCCTGCTGAGGCACAAACAGGATCACGGTGTTTCGGGGCAGTCCAGAGGAGGCGCGGCGCGGAACGCGGCCAGAAGCCTGCACCGAGCCCTGAAGGAAGACGAGACAAAAGGGCTCCAGTGCCCCGCGCCGCGCGCGCCAGCATTTCCCACAGCCTCGGCGACCTCCGGAACCAACGAGAGGTGGGGCAGAGCGGCCTCTTGTGAAGCCTGAACCCGAGCCCTTCCTTCAGCTGGTCCACTCCGCCCGACGTACTTCCGGCGTATTAGTCCACCCTCCCATCCCCACTAGTCGGCGTCCGTCAAATCGTTCCCTGGGAAACGTAGGCTTTGAAGAGAGAGCCCGAGAGTGCAAGTTTGTTCTGGTTCTCAAAAACTAC…	IRSTTQASC*GTNRITVFRGSPEEARRGTRPEACTEP*RKTRQKGSSAPRRARQHFPQPRRPPEPTRGGAERPLVKPEPEPFLQLVHSARRTSGVLVHPPIPTSRRPSNRSLGNVGFEERARECKFVLVLKNYEAPGHCGRN*GNIPSASGTGTPPTKFCTHSRDSVYPPARV*LS*SVTITTMDWIGAQ*LPVVAIVTFLGSHAVVPSSPTGD*PHSRCHGN*EA*LYLRTGRRFLPSLFSQGINSSFSYFFLSQKRSGMIPLHTEGNKEPQPFIFV*NTSTLLRSLTLSQIQALRGLYPPSSPSSHSPPPPSFYIYRH*GSDGAKLQNQCKNPDSQSLASVASLYPPSPQHLIQKGLRLWSKTQLIPA*DLMGLSLLPEFQLPLGPTSPSS*TQKKV…	6.75755	322503	error	550	183.333
EMBOSS_154_2	2	EMBOSS_154	ENSMUSG00000097641	ENSMUST00000180970	Medium	[F].NIQSCTTVLEFK.[L]	NIQSCTTVLEFK	GCACTCCTGGAGATTGAGCAGAGGGTCTTCCGTGCGCTAGATAATGACTGAGCTAGACCTCAACTATAATCCTGAAGCACTGCTATACGAGTTTCTTTTCTCACACCCAAGGGGAGGAAACCCTCCTTAAAGAAATGAAGGAACGGGTGCAATGCCAAGAGATGTGGCTCATACACTCAAACGCAGCAAACTACTTCCACAGCATCACCCCCAGGTTTTCTTTTATGTCCCAAGGGGCATATAAAAATGCTCTCAAACTTAAGCCATCACACAAATGCTAAATTACAACAGAATCTCTGGCAGAAACCGCATTTGGATTTACTGGGTTATTTAATGAATTTTCAACAGAAGCTGCTTCTGCTAAATCCAATTCAGTCATTTCAACATACAGTCTTGCAC…	HSWRLSRGSSVR*IMTELDLNYNPEALLYEFLFSHPRGGNPP*RNEGTGAMPRDVAHTLKRSKLLPQHHPQVFFYVPRGI*KCSQT*AITQMLNYNRISGRNRIWIYWVI**IFNRSCFC*IQFSHFNIQSCTTVLEF*KLSTGYWGTRTAQYARLLPIGLR*KIQNNKQTFHRQRVLRTRKISCSLGWSVVSLWQHPMNITLASFSVIRNKRTSTEKMALSRLCCRQICKAFSLMSD*Y*RWYHLGFVPLDYKTSRLSKPRGASFCPRLLTSWNSSLAFLSEQWVKICNSNKFFPSLVAFGYGLSAQR**PKTRKIIKGRCAKVRDGARPAGRQDCYKHRERFPC*TIKHSPTAFLP*TISLLYWAVVLQ*QAGGRLGRSASARPGQRHHLFPQPPKT…	2.14838	3.61506e+06	error	44	15
EMBOSS_153_3	3	EMBOSS_153	ENSMUSG00000097119	ENSMUST00000181149	Medium	[R].TCSGLPDAVPFQM.[E]	TCSGLPDAVPFQM	CCTCAGCACGCTTGGTCCCCAGGGAGCGCTGTTTGTTTGTTTGTTTGCTTGTTTGTTTGTCTGTTTGTTTAACGGAGCGCTGCGCTGGGCATCCCGGCGACCGACGAGGACTTCGCTGAGTCCTCGGGGAGATGCAAACGAGTCCGTTCTCTTTCTAGGAGCTCCAACTCGCAGCGCCAAGCGCCGAGGATGCCGGACGGACTCAAGATCCTAACTCTAACCTGAGGGACTGAGCGACTGCTCGCCCCAAAGTGTTCGCTCTCCTTCCTGGAAGAGCCACAAGGGGTTCGAGGCGACGCCCTAGGGACCCTTGGGAAGCGTCACGTCAGCCGCTTTCCCTCATCCCTCGCTGTTGGGTGTCTGTGGAACAAACTCGTTTTCAGGACTGTGATGACTATT…	SARLVPRERCLFVCLLVCLSVCLTERCAGHPGDRRGLR*VLGEMQTSPFSF*ELQLAAPSAEDAGRTQDPNSNLRD*ATARPKVFALLPGRATRGSRRRPRDPWEASRQPLSLIPRCWVSVEQTRFQDCDDYSSLST*LYLESPTTQKWRRAHL*EIVCLKWMNPLLVQTFEVGRHTFLISISRWEDTSL*SKS*EMSFVNI*AILSAGCLYKDVKEGSFYSLSICSCLASTSIPSLVLQPTSGLQHILKTT*DMQPCGTEQPLDF*TFYCWISWTTEEGERD*FHKFCDSKEP*LIQILVPEVVLEKQKYKDESFKYLE*AFQFAGTFSY*SLSSHPLSWELGEY*RPMV*TVLQT*RDK*I*LSWLTNCERQWIR*PCI*NF*QFGGK*GK*CCWLV…	4.25302	1.22426e+06	error	132	44.6667
EMBOSS_049_3	3	EMBOSS_049	ENSMUSG00000075511	ENSMUST00000100370	Medium	[L].ALAQCLADMTVNILNK.[K]	ALAQCLADMTVNILNK	AGTTGGTCTCTGAGGCGGCGGCGGTAACAGTTAATCTCAGGAGGTCCTGCTCGGTCCGGGCGCCATGCCTCTGGATCGTCAGGTGGCCATGGGGAACCTTGGCAATCAGGACATACTGGCCATCTTCTACCGCCTGCGCTTCGTGCTTAGCAACCACATAGAGGCCGCCTGGCGAGCCCGGAACCCGGCAATGGACGTGGGAGGAGGAGGAGAAGGCGCCCGGTTGGTCAACGGTCGTATTCGCCCACGCGGGTTCTGAGTGACTTGGAGCACTGCTCGCCCTCGCCCAATGCCTGGCATAGGATATGACTGTCAATATTTAGCTCAACAAGAAGACATGGCATTTACACACAAAAGGAAGACATGATTCATTGGTTTTAAGTAAATACAACATAATGC…	LVSEAAAVTVNLRRSCSVRAPCLWIVRWPWGTLAIRTYWPSSTACASCLATT*RPPGEPGTRQWTWEEEEKAPGWSTVVFAHAGSE*LGALLALAQCLA*DMTVNI*LNKKTWHLHTKGRHDSLVLSKYNIMHPKSAWTLGLTDGGPTMTH*SPNN*HMEWGTSDEK*PQLTPFQDSFPDI*SDQNWDLWVLN*Q*NILSFSWFCFC*EALLKSLSSAR*KQQDKKALLLPQRKLGHLPLKMACTPHL*VFP*EWMVCFDCSAKSQS*ANITYRIFLFISCLESHSGH*SFTCTSMTP*S*ETVIFIAGMIVPTATRKRMRHLDHCDKAQALQANVSYRTRKPELQTEVPSAPSFPAFSSHAEWLAGDVCSM*KGR*GQDISEPHLVCYCLAYSQAGLG…	3.64721	7.12465e+06	error	65	22.3333
EMBOSS_067_3	3	EMBOSS_067	ENSMUSG00000093594	ENSMUST00000176201	Medium	[H].FSKETANIVLNDSVLSEKVYPCSMR.[A]	FSKETANIVLNDSVLSEKVYPCSMR	TGAAGGGAAGTTCCGCGGTTTCATCTTTCTTCTTGCATCTCAGCTGCCTCGTGATCAGGAAGTTATGGAGGGAGACTAGCGCCTAGTATTTGCGGAACCTGAAAACTTTCTTAAGCAGCAGTTGTTGTGCTGGCCTCCTAGGACATTGAGCAGCTGGTCCTGTCACCTTCCAGGTATTCATATGCTCAGCAAAATGTGCATAACTGTAAATCAACACTAAGAGCCCTGGAAGGGTAAAGGTCAAGGAGACTCTCACAAAGGATCCAGAAGAGTTCCAATATTTGAAACTGGGAGAGGAAAAAGAAAAAGAATGAGTTCTCTGGTAAACACTCCACAGGAATCCACAACACCAGGATGAATGGCAGTATGGGACACCCAACCATCCAGGGAAAAGTAGAA…	KGSSAVSSFFLHLSCLVIRKLWRETSA*YLRNLKTFLSSSCCAGLLGH*AAGPVTFQVFICSAKCA*L*INTKSPGRVKVKETLTKDPEEFQYLKLGEEKEKE*VLW*TLHRNPQHQDEWQYGTPNHPGKSRKGMNPAPPQNFWVRRLHL*EISLYSSVIPVFIPFALYAIKYKIFPRHMNKLSHFSKET*ANIVLNDSVLSEKVYPCSMRAGCPFLLLIWGSLETFGTT*KDLLTHPG*YLML*********************ILLKCLVQHISWQCSICIGMLQLLVALEHLD*GLPREAIYYSLAHRNSPGFCLGSLLTP*DALWDGCPFRAGSQ*RLRNCLAAQHKTQIINHMEGHLRWGQKTLTPTVLSKIKISQVVVTRTFHPSTWEAEAVY…	5.6087	18009632	error	65	22.3333
EMBOSS_011_2	2	EMBOSS_011	ENSMUSG00000086013	ENSMUST00000139612	Medium	[F].ERVSMEEAGLNQTHR.[T]	ERVSMEEAGLNQTHR	GCGGCCGCCCGCCCCGCTGCTGCTCCTCCGGGCGCGCGCGGCGCCGCCGGGGGCGGACCCCAGCCGCTGGCCTCGCGGTCCCTTGGCCGGACTGTCCGAAGCCTGCAGGCTCCCAACCCGGACCTCCTCTTTTTGTTTTGAGACAGGGTCTCTCTGTGTAGACCAGGCTGGCCTTCTGCCCGGATACCACATGGAGAGCCGCTTTGTAGGAAGTGCCCTCGCTCCACAGGACAGATCCGAGGAGACTTCTCAGGACGCCAGATGAAGGAAGAAATTTACGGAAAGGAAGAAATGGCGGCCACATTCACACTGTTAAGCTGAAGGAAAGATACTAACTCAGTATCTCAGTCTGCCTTGAGCTCCCGCGTGGCTCACAGTTCAAGAACATAAAGGCAAAAT…	RPPAPLLLLRARAAPPGADPSRWPRGPLAGLSEACRLPTRTSSFCFETGSLCVDQAGLLPGYHMESRFVGSALAPQDRSEETSQDAR*RKKFTERKKWRPHSHC*AEGKILTQYLSLP*APAWLTVQEHKGKILKFYAAFDHLLPYLTFVFHLDSWLLREWGGWPFPLRLSSKTVS*LPMPRASYIIGFKPCLNVSFLK*ELP*RASLGLQSPLSPRTLLLVFSRTLTTI*CFSISF*FSLVFVCFERVSMEE*AGLNQTHRTPPASAS*LLG*KAYHTMPGSLDFLNSSLFPQ*RINSX	0.824079	4.83125e+07	error	191	64
EMBOSS_193_2	2	EMBOSS_193	ENSMUSG00000097542	ENSMUST00000181218	Medium	[V].LQLTRTKQSHR.[R]	LQLTRTKQSHR	CCATTTTAACTGATTTATTGAAAAATAAAAATCACTTGAAAGCATATGATGGGAATTGTACTTAACAGAAAGAGGTGTTTGAATATAGCCCTGGGGCTGGAGAGTGAGGCTGACTAACGTAGGAAAGGGGGGCGGGGGAGGGGAGGCAAAGCTAAGGTGGTGGGAAGAAACAGTACCTGCTAAAAATTCTACAGCTAACCTTTCAGCACCCCGGGGAGCTCCCAGCATCTATTTCTGGGCAGGGTTTGCCAGCTGGATTGGCTGAAGAACAGCATTCAGGTAGTTTATCTAGAAGGGTTAGGAAACGAAACGGCATCAAAGGGAACAGAGGTACAAAATCTGAAAGGATTCTCATGCTTAAACATGTTGCTAGAACCCCTATCGTGGTGAACCTGAAGT…	HFN*FIEK*KSLESI*WELYLTERGV*I*PWGWRVRLTNVGKGGGGGEAKLRWWEETVPAKNSTANLSAPRGAPSIYFWAGFASWIG*RTAFR*FI*KG*ETKRHQREQRYKI*KDSHA*TCC*NPYRGEPEVTKVHPGPSSATN*LCDCGQVISLFALL*KLGSTPT*PQDPAFCSVLSGNLSSAR*PDRLLEK*ATRNRSQNGLVLTFLSRSRAQLCGNAER*ESALMIMKSPLLLRQ*AGHTGCEGAPHRGRFRVLQLTRTKQSHRRRWVNCTQ*RVVSFGSG*EESEEQEEKPPSARPRVKLHTSDALPLKQSVNTTEPNRSSSSSTEATLGIKVLDSCEVTTITAGVRNHLC*LESNEVGQFIPSHHLPLRTGRWLMADHLHPETASILEAREG…	6.02097	4.29745e+06	259	46	15.6667
EMBOSS_307_3	3	EMBOSS_307	ENSMUSG00000112346	ENSMUST00000218379	Medium	[G].SLGAQARQQDVER.[D]	SLGAQARQQDVER	AGTTCACGAAAGTTGTCTGTCAGGCCGGGACCAGTCGAGTCCTTACCCAGCAAAGACCCAGGGACCCAGAGTGGCCGGGTACATCCCATCGCGCCTGGCTCACTCAGGCAGGGATGGAAGAAAGGCTTTCTGCCAAGTGAGCTTTGGTTACTGTCAGAAAAGGAAAGAAGAAAGAAAGGAAAAACAAAAACAAAAACAACTTACCAATTTGTTTGCAGTTGGGGCTGAAGTCAGCGGAGGTGATGGCAGCTTTGTGACCTTTAAAAGAACGTTCCAGAATCGGATCCTCCTAGGATGGAAAGTTGTTAGGTTTGAAAGCAGGTGCAGAATTCCAGCTCTCGACATCAGACGTCAACGTTGCCTGTCCCCCGGGATCGAAGAGGAGGACCCCGCAGCATC…	FTKVVCQAGTSRVLTQQRPRDPEWPGTSHRAWLTQAGMEERLSAK*ALVTVRKGKKKERKNKNKNNLPICLQLGLKSAEVMAAL*PLKERSRIGSS*DGKLLGLKAGAEFQLSTSDVNVACPPGSKRRTPQHQRAAREAWALQPG*EARALPQLPSGGVPTIGRNPQPRHQGEPPRDPPTAPSCRCSPKPPALFKPPW*F*RRRAAGTQPASPGASSASAPSAGISPGAALTAQPGHGVPLRGGERAAELRVSGLPPRPARLGVVPLLPVPPPKDDRLR*RRGPYQAGGHAGSGRRPGPWGTREGWGRGGTVRRPEPSDWSAGASRSLQQRRPNQSPRSRRGQTSPETPRARALPTAESLAGARRGGSAARAHSEPRELRR*RTTGLLSGSGLGLGERE…	1.23681	7.72522e+06	error	114	38.6667
EMBOSS_105_2	2	EMBOSS_105	ENSMUSG00000098292	ENSMUST00000175753	Medium	[R].LLSGLHEDARPSPGGGRLSPQGRGPS.[F]	LLSGLHEDARPSPGGGRLSPQGRGPS	ACTTGGCTTCAACACAACTAGACTGACGAAGGCTGCTCACCACGGATGAAGACGAGGTAAGGCCGGCACCTCAGAAGTGAGGTCACGCAGACCTACTTGCACATGCCATGGGAGGAAGGAAGGTCCACACTGGTCCAGTGTGAGCTGCCTGACTCCATCCTAGCCAGTCCCTTGTACTGCTGCTGCTGCAGGAGGTGGGGGAGCCGGCACTGCTAGAAAGTCCTGTACGTGAGGAACTCTTTCATCTTCTTGGGGATTGGCAGTGCTAGGATTTGATACGTTGTCAGGAAACTTCGGAGGGCTTTCCCGAATAAGTGCTTCAGTGAGGACAGGACCCGGGGAGCTGTCCAGAACTGGACATGGCCATCTCTCGTCCCTGTGGCAATAATTCCACCGTGT…	LGFNTTRLTKAAHHG*RRGKAGTSEVRSRRPTCTCHGRKEGPHWSSVSCLTPS*PVPCTAAAAGGGGAGTARKSCT*GTLSSSWGLAVLGFDTLSGNFGGLSRISASVRTGPGELSRTGHGHLSSLWQ*FHRVGRMCSKDHWSSEQRQPEPSVPEPRS*AARHLPL*QDTSLRVRSTRTSGSSCGCHCHPWRVQAACDEVTSTFLRCRGPT*SHWCHTTL*QARRNQERNHRRQHCFSGLLVSGLVCRTACSTERPTSPQLQSTACYSQGRWSSSKPTADGRITPGSAYRAYSGPKCEASYPGMQRPKSNCRWARSSDLSRRLGGIFLIQKQEPCLYLPNFDLPIVETCGQDQARDIRRLEMVMCPGFPAGWRGPRAEGQPPHNQATLQRLLLQTAPSF…	4.81508	753028	471	46	15.6667
EMBOSS_065_2	2	EMBOSS_065	ENSMUSG00000097636	ENSMUST00000180489	Medium	[L].QDATGLQIVDLIK.[D]	QDATGLQIVDLIK	GACTTTCTCATGCTCTCTTCCCACAAGCCAACAGTTCCAAAGCCGTGAGATTTCTGCTTCTGCCAACCTAGAGCTGAACGGTGCACCATCTCAGTGACAGCTTCCTTGCAGGCTGACCTACTTTGACCAATGACTTTCAGGATTGTCCTCCTCCAAGCCAACTGCCACATGTGAACGCTAGCCTGCTGGAAAGGGCACACGGAGAATAGTGGTGTCATGAGTGATAGCCCCAACCAGTGACCAGTTGAGTGATGGAAGCCACCTTCCACAGGCAAGCCAATGAACCAAAAATTTGATTCTGCTCCTAGAATTGCCAGGAACACGTCACCTCCTTAGCAGGTGCTCGGAACATATTTGGAAGATGAGTCCCCTCGTATCAGTGCACATTCCTCAGCAAAA…	TFSCSLPTSQQFQSREISASANLELNGAPSQ*QLPCRLTYFDQ*LSGLSSSKPTATCER*PAGKGTRRIVVS*VIAPTSDQLSDGSHLPQASQ*TKNLILLLELPGTRHLLSRCSEHIWKMSPLVSVHIPQQKVTGCKTSKKKKKQENGVCASESHPLCQARRRKPSHLNLLTTGWELHNLGTVPHACALALSELRKEDQKVQGHSRPYLRFAASLGDPDLG**RTVDMNCRIAVRNS*HPELCTENAVVRELSGREEHGTKVGMGEALCAHRTCPFMGCGSGSATV*LLS*CVYAKGQGPCIRSGWAGLVWCAVFPVGMAVIHYPSQPAQLLSGFNL**TSQKMPSG*ERDGGGGGGGELPR*PSVSCQPQIFLETTHWIHRAQNLSHQWQKTLLHPI…	1.47363	383834	error	10	3.66667
EMBOSS_228_3	3	EMBOSS_228	ENSMUSG00000097908	ENSMUST00000181190	Medium	[P].SALSTQLLSGGAR.[T]	SALSTQLLSGGAR	GTCTTGCTCTGCCTCCTCCCACACCAGAAGTGAGCATCAGGTGGTGGCGAGCGCGTAGACAGGGTGAAAGGTGTGAGGGTTAGCGACAGATCTGCGTATTCACCTTGCTGGTCACCGGCCACCACCACCTCGGCGCCAATGAATTTTCTGTCGCGAGCCCCGCTAACGGCTTGCCGCTGAAAACTCTGGGAAATGTAGTTAGGCGCGAGCAAGCTGTCGTTAGTTGCAGGTCTGAGGCGGGAACCGGGGCTCCTCATGTGTTCGCGGCTCGGTTCAGCCTTCCACGAGCTCCTGAAGTTCTGCCATTCCCCGTGGTCTGCAGTTCAGGAAGCTTCTGGAACATGCGGCGCCTCTGCCATGGAAACACGATCCGCGTCGTCAGCTTCAGATGTGATCTTG…	VFAARFSLPRHPPASASPSPGITDFREIMIKNK*IARLVAHACDSSAHKVETGKSRLI*G*PDLHNKMQTRQGYIVKPCPLPSLKKKRRVGE*KDQPCKGAYHRAGQPDVRVNPQHPHTEQSKSS*SSAIPRGLQFRKLLEHAAPLPWKHDPRRQLQM*SWNAEFALAAV*KLIL*RDLKQPSEEASRTPAEEHRSVFIPLPLASGSKQERRGKNSEGHERDPAYSPDNI*KCLLHSPRSLQVLQH*GKGRA**LCVTMDSVV*EMGSGQLPLKMNFVSR*FSHRAVGDFLLLHLPP*P*PSPPGRPAILAQKIHKGAGAPVPSPLLEDVIN*SCARMQE*PWEGALGD*ARMGTGVLTHHTQLAGEAD*GPPSG*PWRSAGSAPALPSPIPVGEMVTS…	6.57066	3.04229e+07	error	139	47
EMBOSS_296_2	2	EMBOSS_296	ENSMUSG00000097639	ENSMUST00000199155	Medium	[P].SSLASGSQSSTSNLQMK.[M]	SSLASGSQSSTSNLQMK	GAGATCGCCATGATGGGGAAGAAGGAAGAGGAGACCTAAAGGCCAGCTGACATCAGGACTTTGGGTCCCTAACCTGCAACTCAGCACTCAGTCCATCATGGGCTTTGCTAGTCTCTGTGACTTCTCCAGGGCAGGAAAGTGACAGGTTTCTGCGCAAGGGAGCCCGAGGTACCTGGTTCAGGATGGAGAGGGCACTTGAGAGGCGTCAAAAGCAAGCACAGTTAGAGGACATCAGCGATGTTAAAACCCCACGAGGGTCAACAGTAGCCCAGGCAAAATAAAGGAGCCTGAAGTGGAAAAACAGAAATGGAACAAGACGTTTGTTCTGGAGCACGTGAGATTGTCCTTCTAAGACATTTCCAGAAGTATTCAAAGGAAGATTTAATGGGAAATCATTAT…	IAMMGKKEEET*RPADM*ESGKVATRATSTAVFEQDFGSLTCNSALSPSWALLVSVTSPGQESDRFLRKGARGTWFRMERALERRQKQAQLEDISDVKTPRGSTVAQAK*RSLKWKNRNGTRRLFWST*DCPSKTFPEVFKGRFNGKSLCKRVSNIF*FQKVRSVTPVNYTFCKGEWRLSLLFQNAKRNKQTNKQANQLLLFRTPNTKQKCFWDKLSFILYENENTSFCALGKCSASELQNQHQT*KVCASKEKGNLQDGGEYLQDTCPGRNTYLD*IK*VRGGIGSSCSMLRAWDS*ENAPECSADE*W*RLHQCECP*RRQKLVIMANFMLHMFYYNKNARKI*LLQILNLLTQ*IRRWLLTYKWICQFLK*FPLN*ILS*SFIVSSQTIKHLLKCS…	1.70519	6.90856e+06	663	10	3.66667
EMBOSS_131_2	2	EMBOSS_131	ENSMUSG00000097234	ENSMUST00000181328	Medium	[-].LQNIDFII.[H]	LQNIDFII	GCTGCAGAATATATAGGACTTCATAATTCACTCAGAAATCCCATCATTGATACTTTTCCTATGATATAACTATTGTTTTGAATATATCCTGCTTCAAATGAAAAATAGAGAATGTATCAATGTCAAGAAATTCAAAAGGTAAGTTAGCTAACATTTCAAAAATCCCAAGTCCTTACAGTCTACCTTACTCTACCCACACTACTAGAACATTCTGAACTACAACACAACTGCTTTTTAACAGATCCTATTTTTGCTCACAGACTAAGATACATTAAAACTGGGAGAAAGAATGTATGAACTCAAGGAACCATTTTACCCACACCTATACTGATAAGCCTCTTAACAGCTTCAACTAATTCTAGTCTTACTAAATATAGATCAGCTCCCCTGTCCCCAGAA…	LQNI*DFIIHSEIPSLILFL*YNYCFEYILLQMKNRECINVKKFKR*VS*HFKNPKSLQSTLLYPHY*NILNYNTTAF*QILFLLTD*DTLKLGERMYELKEPFYPHLY**AS*QLQLILVLLNIDQLPCPQNHPHLQHEPEGLPPT*PRRSV*HTQ*WTAECQQ**LPAQLSWGAYPLPPGPEPLYSLG*KEIKQTKRNFRKPVLQFLLTPALEYQVQ*SLISTLSFSFPILPYSRYYCLLKLKIQYL*ETRINLSNSLHLTCTQKKSPFYTIYSYRVMKALWVKQNPLNITHSTR*WWRTPLIPALGRQR*ADF*V*GQPGLQSKFQDSQGYTEKPCLEKPNQKEKENKAKNTRSFFSY*ANILSGTIPTKYSSKENLTLVFTLTISSLKR*KRKTI…	16.8746	42756498	error	61	20.6667
EMBOSS_126_2	2	EMBOSS_126	ENSMUSG00000097026	ENSMUST00000180410	Medium	[R].KSEVPANITNPECLSH.[P]	KSEVPANITNPECLSH	AAGGTATGAAAGAATGGCTTTAATTTAAAATTTTTTTCTTCTAGTGGCAGTTTTCTCTATACACAGTGTCCAAACACATAATTACATTCTCAGACTTTCAGAATCCTCTGACACTGGGTTGGAAGCAGATGTTCGGCCGTGCCTCCTCCCCATCCCATTGTTTAGCTTTCCTGCAGTTTATTCCGGGCGTGAACTCGGTGGTGTTTAGTAAGGGCGGAGCTCCGGCTGAAGTTTCTCCCACACTCCTTGCAAGCATAGGGTTTCTCTCCAGTGTGAGTTCTCTGATGGTCGTGCAAATTGGTCTTCTTTCTAAAGGCCCGCCCACACTCATTACACTCATAGGGTTTCTCTCCGGTATGCGTCCTTTCGTGCTGAATCAGGGATGAGCTTTGACTGAAG…	RYERMALI*NFFLLVAVFSIHSVQTHNYILRLSESSDTGLEADVRPCLLPIPLFSFPAVYSGRELGGV**GRSSG*SFSHTPCKHRVSLQCEFSDGRANWSSF*RPAHTHYTHRVSLRYASFRAESGMSFD*RLSRSQCTHRVSRQCGSSRVA*VTRVD*RLPHTHYIHRVSLQCEFDDAL*NLYSF*KLSHIRCTDRVSLGDETGTADQEGSVQSRRNSPQRGASGAQRSL*CDRSLSHSHYNGTTLLQ*AGLHLEEEEC*AQKPG*SCYFGKVCFFYESSYVYKGMGSDQMPSHKCCTRKASLLYGSSHAGQGKNTC*RPSHIPYTGRVSPHCGSPHVA*GTCCA*MTSHRDCSDRASLPCGFSGVEQEMNCAGRLSHRGYTDRASLLYVRFHADQG…	1.14267	933114	654	6	2.33333
EMBOSS_001_2	2	EMBOSS_001	ENSMUSG00000045391	ENSMUST00000054837	Medium	[K].QGLQLQFLLHENEIQ.[I]	QGLQLQFLLHENEIQ	AGGGCAGGGAGAGCCCTAAGCGATGGAGGACGGACGCTCCCTGGACCTCTGGGCGGCTCTCCAGCTCCCAAGACCTTCCTCCTTCAGCCGGCCGCGGCGATTACCACGGCTCCTCCGACGTCCCCGACCGCAGCTCCGCTGCCTCTGCTGCCCGGCTCGCCCGTGAAACTTTCCCAGGCTCCTCCGAGAAACGCTGCCGCCAGCACTCTCCGGACCGAGAGACAAGCCGTCAGCGACCCGGATGGAGCGGGAGGGGAAGGGCTGGCGGTTCCGGAACAGTGTTGGCTCACGTTTTCAGCTAACTTCTTGGAAGATACGAGGTTAAATTACCCAAACTCTTTCACTCAGAGAAAAACAGGGCTTACAGCTACAGTTCCTGCTTCATGAAAACGAAATCCA…	GQGEP*AMEDGRSLDLWAALQLPRPSSFSRPRRLPRLLRRPRPQLRCLCCPARP*NFPRLLRETLPPALSGPRDKPSATRMEREGKGWRFRNSVGSRFQLTSWKIRG*ITQTLSLREKQGLQLQFLLHENEIQISQANFNIILILNLCVLWSQKX	7.84411	2.01403e+07	119	23	8
EMBOSS_401_3	3	EMBOSS_401	ENSMUSG00000113495	ENSMUST00000222522	Medium	[S].QGSNALLK.[I]	QGSNALLK	GGTCAGTTTTAGTTTTAGAAGGAAACACTTATTAAATATAGGTGGGCATGTTGTTCCCAGATAAAACCTTTTTTTTTTTTTTTGGCTTAATGAGGCTGAGTGGTTCAGCCTAGCTGGTTAGAGTAGTTAGGACACAGTCCCTAGTCCTAACACTATTAACAGAAGTCTCCCATTGTAGTCTCCCCTCCCCCAGCCTGAAACCTGTTTGCTCTGGGGTGGAGCTTTTTGCTCATTCGTTCTGCCACGCCCACTGCTGGAACCTGCCGCCTTGCTGTTCCAAAGCCATCATGTGCTCACCCTGCTACTGGATTCCGAGATTATTTGGTGGGAATCGGGTCCCCTCCCCCTTCCTTCATAACTGAGTGTTGCAACAGTAAAAATTGAACTTTGATCAGAGTG…	SVLVLEGNTY*I*VGMLFPDKTFFFFFGLMRLSGSA*LVRVVRTQSLVLTLLTEVSHCSLPSPSLKPVCSGVELFAHSFCHAHCWNLPPCCSKAIMCSPCYWIPRLFGGNRVPSPFLHN*VLQQ*KLNFDQSDF*LGSVLSSARLVLLFQPELPSQSNRSLGAAGRPQQFGARTGTWRMAEGC*ENAVGVELHRKGKRSSYQTPKQ*TGQSTFSSRTSGCASPPP*SAMVAAAIFIPRTFQHVVFSLS*NLGLPRGLEK*IFLILIEIGFYFNRQA*SLSWPLAFYPCCYCKVSLVPQAVEITEMKRNDSQLLF*PRIVVLLMT*FLPRPC*I*G**FSFRSCTVLRTVHTGS*SYEYSMGIAWCKELLQGKVQLNHF*VSCGLYPV*KGGWYLILAKN…	1.92965	1.18083e+06	529	48	16.6667
EMBOSS_179_2	2	EMBOSS_179	ENSMUSG00000097367	ENSMUST00000181048	Medium	[S].KVNSSQQTKMELLNK.[D]	KVNSSQQTKMELLNK	AAGTAAAATTTTATTACATACTTATTCCCAAAGAGGACAGAGAGGTACATCAAATATTCCAACTCATTGCATTGATTACAGAAGATGCTCACAACCACTTCATAGAAACTGTACTTGGGTTTTTGAGGGGGCGAGAGGGAAGCAGGTATGGTAGTATATACATGCAATCCCAACATTTACAAGATGGAGAAGGGTCTCAAGTTTGAAGCCAGCCTGGGCAATAATTAAGATTCTGTCTCAAAAAGCAAAACCAAAAACCACATACATAAAAGACAGTTTTTTTCTTAAGTCATCAGACTATCTGGAGTAAACACATCATTTCTAAATAACCTACAAGTCCAAGGTTAACAGTAGCCAGTAGCAAACTAAGATGGAACTGTTGAACAAGGATATTTTTCT…	SKILLHTYSQRGQRGTSNIPTHCIDYRRCSQPLHRNCTWVFEGARGKQVW*YIHAIPTFTRWRRVSSLKPAWAIIKILSQKAKPKTTYIKDSFFLKSSDYLE*THHF*ITYKSKVNSSQ*QTKMELLNKDIFLGL*T*LRLDSNS*SCFCLPNARITSTCCLLCQSAGAKSLPPKKRLQDCHLLALYRPQSSCRATSSMAFIYHIGSQPLCPSFRCSKHRIS*LS*EVGFQSKKPHENL**ISNQRS*IAVYEM*CHL*TTILPVRSLPDVMDCLAGLL*SRDAVQPGQYP*QACLLPRKVPVTPHRAVLVVMVKEKTFTKAV*LLSCLLQHEPELKHPNVTFETT*SHSTAVEDKGRCALWPWPYSDPAWMSTRLLQIPHSFSSG**VTVALACPSWC…	10.236	1.72814e+06	error	85	28.6667
EMBOSS_075_2	2	EMBOSS_075	ENSMUSG00000097393	ENSMUST00000180524	Medium	[R].KSCLFQMPFML.[P]	KSCLFQMPFML	AGAGCGTCCGGGACAAGCGCTCTGTTTTGAATCTTTGGCATCTTCAGGGATGGATGGAATCCTACAACTGAGGGAGACTGCGGTCTTGGGCGTGAGCAAGTGAGGAAAAGCGTGCTGGAGCGACCAGCAGCAAACCTCCTCAGAGAGGGTTCCCGCGCGCGCTCCACACCTTTCCCAGTTGTGGTTTACACCCCACTGACTTCTCTCATCACATCCGTGTCTCCATCACCATCAGATACTTTTCTCAGTGCGTCTGAAAATGATGGGAAAGGCTCTCAAGCAGCCTAACGAGCACACTACCACCAGCACCCTTCACAAACTGAGCCCAGAACTTTCTTGAAGAAAGGATGCTGCTGGTCTCCCAGACCTTCCTGCTCAAAACCATAAGTTGGAAACACT…	ERPGQALCFESLASSGMDGILQLRETAVLGVSK*GKACWSDQQQTSSERVPARAPHLSQLWFTPH*LLSSHPCLHHHQILFSVRLKMMGKALKQPNEHTTTSTLHKLSPELS*RKDAAGLPDLPAQNHKLETLCNVLQNLMFWTSSSNIKQQ**YT*PWQ*PTVLELDLRHAHQEGKYAVY*KTNQLPRACEVKCLDEEPTSHHFTEPAQSDK*LIYLRLCWHTQMS*NFPECVRSSHLESSRVCLLHETCLSHLYLG*SLHMPDIGLPEPCPARPV**SWS*RMAVTKPCMVTVLIPKMHAQWKEWGTAGPTQSAQ*HLHMKPQGPSLARSSPESSSFLLQQMGTKTDNHSLTLCRNACPWLSARCQQNTFRIHSNAETMSRTPASAWNGMVSWRRQR…	0.724679	3.28642e+06	error	50	17
EMBOSS_151_3	3	EMBOSS_151	ENSMUSG00000097811	ENSMUST00000180790	Medium	[S].KVAAVSQQSAEMASDEGNLSLCPGQFTILINLNLK.[T]	KVAAVSQQSAEMASDEGNLSLCPGQFTILINLNLK	CACAGAAACCATGTGACTCGTGTTTATTCTATAAAGATCAGGAGATACACAAATCCAGCAAACTCCCACCGACCAGCAGAGGACCACTTTCTTGGGATCTGCTTCCTGTGTCCGTCCACATGAGAACACACGCTTTGTCTCAGGTGAGAAGGGGCGAGCCCTGCCTGCCCAGTGTCTAGCCTCTGGCCAGCTGTGCAGCTCTGCCAAGCCTTAGACACATAACTTACGTCGGACCACATTTTGCACAGATTCTGAGGTAGTCCCAGTGATGTCTGCTTGGCTCCTCTCCTGCTCACTGCACGTTAGTGTCCTCGGTTGGTGTGACCCCCTGACCTGCTGTAACTGACCCGTACATGAAGCTGGCCTGTGGAATGCTCTCCCAAGTAGGACCCTGAAGGG…	QKPCDSCLFYKDQEIHKSSKLPPTSRGPLSWDLLPVSVHMRTHALSQVRRGEPCLPSV*PLASCAALPSLRHITYVGPHFAQILR*SQ*CLLGSSPAHCTLVSSVGVTP*PAVTDPYMKLACGMLSQVGP*RVGLRSPAEAY*KGARHGQTRVA*SHIIEILIHTTQGRWKLPKLCQAHWTALAPQVGLGSLNESLSCPPSKVAAVSQQSAEMASDEGNLSLCPGQFTILIN*LN*LKTRFLCVALAVLELHL*TRIVRAT*RDPVSNTHQRLRHRDRQRQTDSALRHFQSVVGYFPPEMEALLEPHTPTEKA*RLKVGRVRTLTRVAGTHTEEATPNHPGLLIFGDPARQRPGPTGAGHRARCRIPVGSHGRPVHTSPQRPHFPHLPWRFPPVSNAAS…	2.89779	122343	error	11	4.33333
EMBOSS_394_2	2	EMBOSS_394	ENSMUSG00000106799	ENSMUST00000201324	Medium	[K].QLGRELEK.[K]	QLGRELEK	GGGATAGAAGCAGCTGGGGAGAGAGCTGTAAGAGAAAAAGCCACAAGTAAAGAAGCTGCTGCGTAAACCTGCCTTGGTGTCCATGTTGTTCTTGTCTCCGCAGGTGGCAAGGACTGCGAAAAGTGATGGCCCATATGGGGAACTCATCACTTTGGTCGGCAATGGATTTTGTTTGGTTTTGCTTTTTCGAGGACTTCTGGCACATCACTAAATTATTAATTTGTGGGAGAAAATAAAACTAATGTGGATCACCAACCAAGAAAGCGTGTCAAAATACCTCAACAGCATGACTTAAAATATTTGTCGTCTTATACTTATTGGGATATTGAAGTTGGTGATCAACGAGTTTCATATAAGAACATGGTGCATTCTGACTACTGTAACATCACACCTTTCTAA…	G*KQLGREL*EKKPQVKKLLRKPALVSMLFLSPQVARTAKSDGPYGELITLVGNGFCLVLLFRGLLAHH*IINLWEKIKLMWITNQESVSKYLNSMT*NICRLILIGILKLVINEFHIRTWCILTTVTSHLSNHPPRFLLSLYFHIPQFLFFVIVVIL*PTGIICLTIVWNYPLGLGFLFMIGI*DLMRSS*PVHTASLKEQLHLELWRREAP*PRQLL*RTTFNWG*LTGSEIIIKALRNSEPWAKMNCSKQ*WVSSAI*SLQITKISRIFVSRIKLYKMTGKKKCFI*NAYVNLGNNLC*EDNNAAQKQPTVNSIWFLLNG*ILA*FFSLSTSQLDTLIYSNVHVSNVGK*KTLFR*VNSIPFHHRCDEVAKDTLFLVAFPQPLLPASSGMWFSFLE…	1.77986	930599	error	83	28
EMBOSS_108_3	3	EMBOSS_108	ENSMUSG00000078706	ENSMUST00000150490	Medium	[R].NFFFPISFALQCSGRTNPDSTK.[N]	NFFFPISFALQCSGRTNPDSTK	AGAGGGCGCCAAAGGCGACGCGCTGGCGGCCAGCTCCAAGCCAACCAGGCCCATTGCGTCCGTCTGCAGGAACCTGTCCCTTCACCCTGCTTTGGACACTGAGCTTCGGAGGATCTGGCTGCGAGCTGATTCAACGCCAGGGCGCCGCCTAGAGGTCGGTCGCGTCCTCGGTCTCGCTCACCGACCACAGAGCTGCTTGTCCAAGCCACAGTGTCAGACTTAAACAAAACAAAACAAAATTCCTGCTTGGATCAGAGACTTGGCTTCTGGGACCGTTGACTTATCAGAAACTTGCCTCCTCTCTGCTTCATAACGAACCCCAGGAAGAGAGAGGGACCAGGGATCTCAAAGAAATATTTGTCCTTGTGGCACCGACTAGGTGGAAGAAAAGTCTCAACA…	SSPDPPSAVGATTPDTVHEASKRGGGGPGPTLG*PPIWSQDTSGSRNGWRTARFQERAPKATRWRPAPSQPGPLRPSAGTCPFTLLWTLSFGGSGCELIQRQGAA*RSVASSVSLTDHRAACPSHSVRLKQNKTKFLLGSETWLLGPLTYQKLASSLLHNEPQEERGTRDLKEIFVLVAPTRWKKSLNMSVSFKDLRFCV*VCTGSSHYPDCSA*PPSPVRARTML*LHEERGHGKVTLFS*RSITRFLDNLEMDMFWKRIWKTSVCVCVCVCVCVCVCVQ**EKIAHIAFTY*VNSHWCPSNSQGGTWRHQ*PCPGKFVLSP*KLIFEIRMTLEGIRPTGLRCP*SPCRLLFGD*DQKPELWSCRASKNACSESVYTHKVC*AKGVPLRFSKEPLSPV…	1.34239	43534498	678	399	133.667
EMBOSS_115_2	2	EMBOSS_115	ENSMUSG00000085438	ENSMUST00000153581	Medium	[L].NVLLCCSSPSQEGPAGPVASSEWEETAGTMLTLNCQRVGGQGRK.[S]	NVLLCCSSPSQEGPAGPVASSEWEETAGTMLTLNCQRVGGQGRK	TTTCGCGCCTCCGCCCCTGGGTTGGCGGACAGGGGAAGGAGCGAAGATGGCGGAGTGAGGCGTGCCCCGGGCAGCTGGCCTGCGGGCCCGGGGCAGGCCTCCCGTGAGAAGCGGAGTACTTGTGCTGGACCGTGTGAGGAACCATATCACACAAGATGAATATTTTCCTGACCTTAGGTGCTTTTATATTCAGCTCAACATTCTGAACTCAGGACTTGGCACGAATTCCTATGTGGACTGCTCAGTGAGGCGTCCTGGTTCTTCCATCCTGTTACTTTCCCCAGTGAGATGCAGATGTCTTTCGACAGATTACCTCCATGGTTTAGGATGCAGAGACTGCCTTTCTTTTACGTCAGACTCAACACAGGAAAGCCGTGAGGATGCAGCCGTCCTGTTGAC…	PPPLGWRTGEGAKMAE*GVPRAAGLRARGRPPVRSGVLVLDRVRNHITQDEYFPDLRCFYIQLNILNSGLGT*VDRDNHPKSCCSGLKGSIEATY*TVKSNRR*R*K*VQASYHGSPLCPALGTWGTEEFLCGLLSEASWFFHPVTFPSEMQMSFDRLPPWFRMQRLPFFYVRLNTGKP*GCSRPVDFSKKTNHGLGSSAAFELERRCLQVEGRC*I*NKCLGSVA*VVFFLKDPNKKTEQIPSVGDFRFFF*CLPILTLL*AQLTAVSSKYLI*FEVKEMLSKFWLTL*QFSWTKTRYDKSRNQV*FCMGVKSLQFYGYKSTFLNKIFLLEKKPVVYKKALDSLIVLNVLLCCSSPSQEGPAGPVASSEWEET*AGTMLTLNCQRVGGQGRKSRCSGP…	3.34809	1.03013e+06	error	47	16
EMBOSS_196_2	2	EMBOSS_196	ENSMUSG00000097305	ENSMUST00000180839	Medium	[E].AQGAQNSAESLQKVGTGAQQLFR.[R]	AQGAQNSAESLQKVGTGAQQLFR	CACGCAGGCCGCGTGGCTGGAAAGGATCTCCTGATCTCTGAGGGTCTTCAGGCTCTGGAGCTCAGTGGGAACTCTTTGGACAGCAGCTCCGGAGTGTGCCACCCATGGAGTGATCAGCACCGCGGGCCAAGGAGGAAAGAACCGTGTTGGGGAGTGTGACCCAGACGGGCCAGCTGATGCAGAGCCCGGTCTGCAAAAGGGGATGTGAGCCCACGTGCTGGAGCACTGAAGAAGGAGCTCACGTGCTGGATTCCACAAGTCCCTTGCCCCGAGGGGCGGCGCCTGCGTGAGGCAGCACCTTCAACCCTGCCCTCGCCGGGGGACTCGCGAGTTAGCAGCCGGCCTGTTGAGGTCAGAGGAGGCGGGGTGCGTCCAAGCCTAGCGACTGCGCGTGCTTAA…	TQAAWLERIS*SLRVFRLWSSVGTLWTAAPECATHGVISTAGQGGKNRVGECDPDGPADAEPGLQKGM*AHVLEH*RRSSRAGFHKSLAPRGGACVRQHLQPCPRRGTRELAAGLLRSEEAGCVQA*RLRVLKALEQRTSERPEQPQPVTPPEPRATTAFPAWGGGQMRGALHPERATLSAATWTTERPCSLCSSPRTSRSGYGKSSRSTADKAPR*SAALWASGKQWSFSADCRQSRLSISSITTELWEQSRGTQRLNTCLQHPRHPTSESHIRLHSPCLYHPPSSQLASNSTVSPNRSYWSQCLKAVNSIMSSFALVESVGVALCWDSVPCQFL*KLAFSPLSFFVVLEMNLGP*IYKVGSLPLSHVLYCPPILRSLRVLRFLLHFLLSCFLDSPFF…	1.12412	852192	error	105	35.3333
EMBOSS_240_2	2	EMBOSS_240	ENSMUSG00000097928	ENSMUST00000181702	Medium	[N].VGSEIRARER.[D]	VGSEIRARER	GCACTCAATCAGGGCGATCCTAGGCTCGCACGGCGGCTGTCCACCGTTTCCCTCCGCCCACCGCGCCGACGCCCGGGCGCCCACGCCACCCTTTCCCCGACCACCCTCTGCGCAGCCCGGGCCCAAGCGGCGGGACGCAGGCTCTCGGACCCGGAGCCGGTTCCCGCTTCTCTCGCTAGAGGGCAGACGGGGCCCGCTCAAAGCCCTCAGACCGAAGGGCACGCGCAGCCGGTAGAGATCCCGCAATCGGAGCCGCACTCCGGGGCTGGGCTCCGCGACCAACGTGGGGTCCGAGATCAGAGCCCGGGAGCGCGACGCACGGCAGACCCAGAGGACCCGGGAGGAACGGCCAGCAATCTCGGGGTGCGCACAGCGCACGGGCACCAGGTGGAGGCGGCG…	HSIRAILGSHGGCPPFPSAHRADARAPTPPFPRPPSAQPGPKRRDAGSRTRSRFPLLSLEGRRGPLKALRPKGTRSR*RSRNRSRTPGLGSATNVGSEIRARERDARQTQRTREERPAISGCAQRTGTRWRRRRHGSSGTRLGAKRAARGHTGRG*VPAWEQRSGWHSPGLGSPSAGAGFPRDPRSFFLPFPLPLPSLRSDISLKMSALRGPGWATVTRDKFGPRACRKVCPGREEPVAGLRGGVACRLQGAAWTRSPGAPATSGGVSGLLLCPGSCRCRLWSGLAPVAVSLPYSPKRERCSQSGLCSHLPAAAAAALRSAPAAGAARSSHKFWGSPSRLFFNCPQVGRRRLLRTLPLASPPPSFPTTPPPRGADTPPGGA*AGRSRLSPFLLAAGPA*…	1.41752	5.43073e+06	95	617	206
EMBOSS_289_3	3	EMBOSS_289	ENSMUSG00000112547	ENSMUST00000219127	Medium	[S].KGIYLTVCSPIPNNGSVVAMNGSPRIQLLNPK.[R]	KGIYLTVCSPIPNNGSVVAMNGSPRIQLLNPK	TTTTTCTGCCTTCTGCCCTCCTAAGCCTACGTAATAGGGCGTGGCTGTGGAGAGAGGGAGGGGCGGGGAGTTTGTTGGAGCTGAGTGCTTGGGAGAGGCACCGCTTCGGAAGGGGAGGAAATGATACACAGGATGAAGATGAAGAGGACGACGAAGAGGAGGAGCTTGAGCTATCTGAATCTGTTTCACTGTCCGAATCCGAGTCCAAGGAGTCCGAGGCCTGCAGCACTGGCGGCGGCTCCGCGGCGTTCGGGCCGGGGACGCAGACCCCGCTCGGCAGCGGCGGTCTTCCGCCGGGATCCGAGTTCGGGGCTGGCGGCGGCGGCGGTCTTCCCCCGGGATCCAAGTTCGGGGCTGGCGGCGGCGGTCTTCCCCCGGCATCCGAGTTCGGGGCTGGCG…	FLPSALLSLRNRAWLWREGGAGSLLELSAWERHRFGRGGNDTQDEDEEDDEEEELELSESVSLSESESKESEACSTGGGSAAFGPGTQTPLGSGGLPPGSEFGAGGGGGLPPGSKFGAGGGGLPPASEFGAGGGGGLPPGSEFGAGGGGLPPASQFGVGGGGDLPLGSELGASGVGLPPASQFGVGGGGGLPPGSEFGAGGGGCSPGGGASRRS*GGGEAADPWPEPPNLSVCSCSVASTTSMAQPRAQSSARVPSEAELANAAALKSQ**IFNSGSIRPQWINIGV*IQCLSFGLRPLQREFK*QC*YVVSCIRVL*SHRTYG*SLYSKGIY**LTVCSPIPNNGSVVAMNGSPRI*QLLNPKRQAGEGQERDSLLPMSLYCLQQKV*PRLKVCSTTP…	3.25395	277574	error	121	41
EMBOSS_099_1	1	EMBOSS_099	ENSMUSG00000073164	ENSMUST00000149246	Medium	[R].ESQKLAEQAALKWAPA.[G]	ESQKLAEQAALKWAPA	GCGCGCCCGCGTGTGGGCTCCTTTGCAGAGGACTCGGTAGCTGCAGCTCCCGGAGCACAGCGGACAGAGCTGCGGGCTGCGTGCGCCCCTGCTGCCACCGGGCCTGCCGCGGTGGCTCCCGCGCCCCGCGGCGACTTCCGCTCCCGCGCTTCTCTTTGTTCAAGTCCCCGAGCGGCGGCGGGGTCGGAGCCCGCGCCTTGGGCGACTGAGGCGGCCGCAGTCCGCGCCCCGGCGCCCTGGCGATGCCGGACCAGATCTCTGTGTCGGAATTCGTGGCCGAGACCCTTGAGGACTACAAGGCGCCCACTGCCTCTAGCTTCACGCGCACGGCCCAGTGCCGGAACACCGCGGCGGCCATCGAGGAGGCTACACTTGGGAAAACCATCATATTGAAAGACA…	PSRALPFPREASRTVAWWRAVPPDCARPRVGSFAEDSVAAAPGAQRTELRAACAPAATGPAAVAPAPRGDFRSRASLCSSPRAAAGSEPAPWATEAAAVRAPAPWRCRTRSLCRNSWPRPLRTTRRPLPLASRARPSAGTPRRPSRRMQ*LMMMCT*TSLGKSGICCILPRRVFTKM*CWRPTGTSLL*ATLGKTIILKDIVKVQEEMKGLVSTASCHRQAEQQAGS*GAAGPAETQGVH*P*ASGVVEGLPQ*LSHWLPDCGQF*DLGQLLPLQRHLQDH*TCLPHLCHQQ*RLHRLPSVHHCSEPDLSGQAGTEGQVGLQHV*PRQQWLHQLQ*NAGVSAGTCT*QGLAHGECRHPGPPSPAPYTRSFLCPLATWCTKGLHVFAQNNNKSQASIDCL…	8.10613	7.26951e+06	error	243	81
EMBOSS_126_3	3	EMBOSS_126	ENSMUSG00000097026	ENSMUST00000180410	Medium	[K].SSMSLQKPKPTNQPTNQT.[Q]	SSMSLQKPKPTNQPTNQT	AAGGTATGAAAGAATGGCTTTAATTTAAAATTTTTTTCTTCTAGTGGCAGTTTTCTCTATACACAGTGTCCAAACACATAATTACATTCTCAGACTTTCAGAATCCTCTGACACTGGGTTGGAAGCAGATGTTCGGCCGTGCCTCCTCCCCATCCCATTGTTTAGCTTTCCTGCAGTTTATTCCGGGCGTGAACTCGGTGGTGTTTAGTAAGGGCGGAGCTCCGGCTGAAGTTTCTCCCACACTCCTTGCAAGCATAGGGTTTCTCTCCAGTGTGAGTTCTCTGATGGTCGTGCAAATTGGTCTTCTTTCTAAAGGCCCGCCCACACTCATTACACTCATAGGGTTTCTCTCCGGTATGCGTCCTTTCGTGCTGAATCAGGGATGAGCTTTGACTGAAG…	GMKEWL*FKIFFF*WQFSLYTVSKHIITFSDFQNPLTLGWKQMFGRASSPSHCLAFLQFIPGVNSVVFSKGGAPAEVSPTLLASIGFLSSVSSLMVVQIGLLSKGPPTLITLIGFLSGMRPFVLNQG*ALTEGFPAVNALIGFLASVGPLVLRE*RESTEGFPTLITFIGFLSSVNSMMLYKTCTPFKSFPTYVALIGFLSGMRQGLLTKKGLFRAVGILPSVEPLVLREVCNVTEVFPTVITMVRLYFSKQAFTLRKRSVRHKSQAEVVTLVRFASFMNPHMFIKGWALTKCPPTNAALERLLSCMGPLMLDKGRTPAKGLPTFLTLEGFLPTVGHLMLREGRAVPE*PPTEIAAIGLLSRVDSLVLNKR*TALEGFPTEATLIGLLSCMCVFMLTKG…	1.14267	1.31764e+06	1425	6	2.66667
EMBOSS_109_2	2	EMBOSS_109	ENSMUSG00000097154	ENSMUST00000180468	Medium	[G].KIDELR.[N]	KIDELR	GACTTGAGGCAGGAGCTGACCTAAGAGAAAACAGCCCGTGAACCCGTGCGGAGAGAGGCTGCTGGAGCTCCAGGACCTACATCTGCCTGGACTGTGTTCTGGAGGCATCAGAAGAGATTCCACCCAGAAGAATACATACTGGAAGGGACCACATCTTGAGAAGACAGCCATTCATCACATGGGACCCAACGTACCGGGGCTCAGAACACCCTCTTCCCAGGATGAAGGACATCAATGACCATCTGTTTCCTCTGAAGCAGACGGTTGGTCATGAACTTCCTGGTCCGGATGGTTACTGTGTCATTCATGATGGCTACGGCGCTGGAGCTGGAGAGCAGGTTCATTCTTTCTTGCTAAGAATGTAATAGGCTCACTCTAAAAATTATAGCCACATGGAAA…	T*GRS*PKRKQPVNPCGERLLELQDLHLPGLCSGGIRRDSTQKNTYWKGPHLEKTAIHHMGPNVPGLRTPSSQDEGHQ*PSVSSEADGWS*TSWSGWLLCHS*WLRRWSWRAGSFFLAKNVIGSL*KL*PHGKYRVMLRQSGWRLGGQLLPSVPVIAITVHVLTL*DQPRDICLLIVSENNLEVMTINKIMGSSLGNSHKNERRGRMERRWSKENHGIQRTDTLSLSLSLSLSLSLSLSAGKQEERQTGSLTITS*YKY*VA*CSVLNKNGPHRFLCLNTRSPVGRTVW*GSGGEDLL*KVCYWVGFELSEAYATPSSLSLPLSFPPFFPLHSPLYFMVVSQDVSPQLWLHAMLACLLLCPTPSPS*WSWARSLKL*AASFLS*VAVVMVFLSWP*KSN…	33.1354	8.97945e+06	432	179	60
EMBOSS_006_1	1	EMBOSS_006	ENSMUSG00000021268	ENSMUST00000143272	Medium	[K].IEALGWDGLC.[P]	IEALGWDGLC	GACTTTTGGTAAATCACCTTTTGCCGTTTCCTTTGTCCCCGTGAAGCCCCCCCTGGCCGCCCCCTCCTCATTCTGGGCTGGCTGGCTGAGGGGGGGGGCAGCCTGAGGGCTGCGACGTGGCAGGTTTCTAGAATGTTCTATTGATGGCCGCAAGAGGGCGCTGGTGGCACTGCGGAATTTTGGGGGGCGGGGTGGGGAGGGAAGAGGAGGTGGCCTTTGTTCTCCTGCAGGAGGGGGTCGGGAGCGAGATGGGTTGCGGGACCATGGGTTCATTTACCTATGGGGAAATGTTAGTAGATACCTGGATTCACTAAGGTGCGCTTGCAGGACTTACAATAGGTCAGAGATGGCGTCATCTGCAGTGGCTGTGTGATTTAGGGTGTCATGGACGCAGATTAA…	DFW*ITFCRFLCPREAPPGRPLLILGWLAEGGGSLRAATWQVSRMFY*WPQEGAGGTAEFWGAGWGGKRRWPLFSCRRGSGARWVAGPWVHLPMGKC**IPGFTKVRLQDLQ*VRDGVICSGCVI*GVMDAD*FIFSDLCFLGS*KGVAF*GRIAKNIN*LGVIHKGLES*RGKGGARF*GEGC*LGGGRQGGLPLFCHIAEDLKNECSVLRIESLNFNYA*LDLLMVGGGSVLLLLIRSRIVVWGQPLTAGSLWCKAAPGCLCVCCVMSGKWLRQRRWGCIATLKDG*CGLCPPPPSLKPVGRPPPSYVSLALAAASWRLWGCLRWLGYWSLSECGPRAP*RSLCANGSWPARLALELRMRTQLTLVTCQSIHLYPSHCCPPLPFLLLLLLPFLLSLF…	6.90162	2.15899e+06	1640	133	44.3333
EMBOSS_173_1	1	EMBOSS_173	ENSMUSG00000097479	ENSMUST00000181481	Medium	[K].KNFMPLK.[S]	KNFMPLK	TCCTTTCGGTTCCGGGCGGTGGACCGGAAGAGCCTAGTAGTTTATTTAGCCGAAATTGGTGGGATGAGATCTGTTGACAGACCTGACAGGAAAAAGGACCCTGGGACGCCAGCCTGGTAGGGAAAGATTTGGGGTGGAGCCCAGAGAGGACCAGAAAGCAAGAAAGCCTCTACGCTATCCTGAAGAGTTTTTCAGAAAAAGGAGCTGGAGAGATGGTTCGGCATTTAAGTACACTGCCTGCTCATCCAGAGATCTGAGTTTGATTCCCAGAATCCACATGGCAGTTCACAGCAGCCTGGAGAGTGGAGAAGTCTTCCATGTTAACAAGCAGCTTTAAGTGGTCACACGCGTTTACTCCGCCCGCTTCTTGCTTGAAACACCAGAAATCTGATATATACT…	SFRFRAVDRKSLVVYLAEIGGMRSVDRPDRKKDPGTPAW*GKIWGGAQRGPESKKASTLS*RVFQKKELERWFGI*VHCLLIQRSEFDSQNPHGSSQQPGEWRSLPC*QAALSGHTRLLRPLLA*NTRNLIYTD*SNCNQITLAILVVHWDLL*RQTTIQQLETLLTELFKDSCKNKKMSSQT*IQEPFGC*HQFKSCAK*VTVPVPHP*ELPFFPLKIAVSALRFTCRLGESDCF*NVTKCPPRCLTFPRTE*LWFYSSHWS*KKSQLETQWTSPFKHT*LPPSPTEHRC*LKNKINNKHPFY*FERYCNFYTSMIFFNVLQLCGFAVQQFIDHTVQDHQQDWNDVIEGTIMLITLPENRIQEGQLSLDTA*RREGRSVLSSHPSIPVLKRANRKLTK…	21.2351	1.01364e+07	844	64	21.3333
EMBOSS_251_1	1	EMBOSS_251	ENSMUSG00000115617	ENSMUST00000226648	Medium	[S].SQNHSVAGVGTSRVVYFR.[A]	SQNHSVAGVGTSRVVYFR	GGCAATGGCGGCAGACTTGGTAGTGTGTAAGTCACCCAAGGAGATTGATTTTAAAGGCATGAAGGGGGTCATGGAGAACAGCTGAGGCTTGGCACTGTCAGAGGCCAAGAGAGAAGCCAGTTTGAATCAGTCAGCTTGGAGAGGAGTTTGAGCCAGAACAGCTAAGTTGAACCAGCCAGGCAGACGTTGTTGGGGTTGGTCTGGTGCTGCTGTGTACTGTATCCCAAGGTCTGATTACCCCAAGATGAGCTAATTCCCACCTACCTACGCCAGCTTTTGTTGTGTAAACCTTGCCCCCACCCCCAAGCTATCCCTGATTGGTTAATAAAGATGCCTACAGCCTGGCCTGGGCAGAAGAGAAGTAGGTGAAGCTTCAGGAGGCAAAAATGACATTCAAGT…	GNGGRLGSV*VTQGD*F*RHEGGHGEQLRLGTVRGQERSQFESVSLERSLSQNS*VEPARQTLLGLVWCCCVLYPKV*LPQDELIPTYLRQLLLCKPCPHPQAIPDWLIKMPTAWPGQKRSR*SFRRQK*HSSQNHSVAGVG*TSRVVYFRASLNAAQSGKTS*EVSSVPCAQQSTPNLSEKENKLNTDQTWLHPSAL*VYVTPSVQTD*LRNKFMTMGPEEGPIQEVFSHTHCPTVSRLESTPTPAFWAERRQNSQACLTFQVSACL*AQTPPCPLQCSDFHVYTTACTHPYFHTT*AHTHIHRWEILKNVLSGIHHRRLFRHGLSQ*KVFNPSVAPTLSQVEFLRTKHRS*VDFLQLPRTVSQKQSYRSQKSRLCSS*SNNGCLQMEGPRILVESMK…	0.855458	2.2087e+06	error	5	1.66667
EMBOSS_321_1	1	EMBOSS_321	ENSMUSG00000114953	ENSMUST00000223609	Medium	[R].SWIAASCARGA.[A]	SWIAASCARGA	GGAGGAGGCCAAGAAAGCCCACCACATGCGTTGGCCCCGGCTGTCGCACGGCACCTCCATGGTCACCGGTATGATGAGCGCATCCATCTTGGGCTCGTGGACCGAGGACGAGGAGGAAGAGGAGGAGGAAGAAGAAGAAGAGGAGGAGGAAGAGGAGGAGGAGGACGCGTCTAGGCTGAGATGGTTCGCGTGGATATTGCTGCTCATTCTAAGACCGCTGCCTCCGCCGCCGCCGCCGCCGCCGCCGCTGCTGCCGCCGCCGCCGCCGCCACCGTTTGCCATAGCTAGCAATGGGCGGCAGGCGCAGGGGCTCGAGGGAGCTCCTCCCGCCGCCAGCGCCACCCCGAACACCCATCAACAGCCATGTTGCTGCTACTGCTGCCGCTGCCGCCGCCGCCG…	GGGQESPPHALAPAVARHLHGHRYDERIHLGLVDRGRGGRGGGRRRRGGGRGGGGRV*AEMVRVDIAAHSKTAASAAAAAAAAAAAAAAATVCHS*QWAAGAGARGSSSRRQRHPEHPSTAMLLLLLPLPPPPRSAGRGAGRRLGSGRCARPGRVCGDIYSQAPPPALPRAAGRPGGGRG*GRVAPTPRPRPRSPPGLRGAPRAQGAPRAVRARGLCLPKLRERDPAYPRRRPARLACATRVRCARARGLPPVPAQLSRVMRRQLLRIGESAPSRPGVPAPPFLPGAALRSWIAASCARGAAAGWLRRSALPPRPASRCSAGPLRAGSL*P*ASSASARFFLLASSGSSSSPFSQPEPLRRAPRAPRSRQQWQLQQLERARAQTARSGRGGGLPG*LAS…	1.12412	3.60682e+06	291	26	8.66667
EMBOSS_075_2	2	EMBOSS_075	ENSMUSG00000097393	ENSMUST00000180524	Medium	[Y].ANELYNLVPVSVK.[C]	ANELYNLVPVSVK	AGAGCGTCCGGGACAAGCGCTCTGTTTTGAATCTTTGGCATCTTCAGGGATGGATGGAATCCTACAACTGAGGGAGACTGCGGTCTTGGGCGTGAGCAAGTGAGGAAAAGCGTGCTGGAGCGACCAGCAGCAAACCTCCTCAGAGAGGGTTCCCGCGCGCGCTCCACACCTTTCCCAGTTGTGGTTTACACCCCACTGACTTCTCTCATCACATCCGTGTCTCCATCACCATCAGATACTTTTCTCAGTGCGTCTGAAAATGATGGGAAAGGCTCTCAAGCAGCCTAACGAGCACACTACCACCAGCACCCTTCACAAACTGAGCCCAGAACTTTCTTGAAGAAAGGATGCTGCTGGTCTCCCAGACCTTCCTGCTCAAAACCATAAGTTGGAAACACT…	ERPGQALCFESLASSGMDGILQLRETAVLGVSK*GKACWSDQQQTSSERVPARAPHLSQLWFTPH*LLSSHPCLHHHQILFSVRLKMMGKALKQPNEHTTTSTLHKLSPELS*RKDAAGLPDLPAQNHKLETLCNVLQNLMFWTSSSNIKQQ**YT*PWQ*PTVLELDLRHAHQEGKYAVY*KTNQLPRACEVKCLDEEPTSHHFTEPAQSDK*LIYLRLCWHTQMS*NFPECVRSSHLESSRVCLLHETCLSHLYLG*SLHMPDIGLPEPCPARPV**SWS*RMAVTKPCMVTVLIPKMHAQWKEWGTAGPTQSAQ*HLHMKPQGPSLARSSPESSSFLLQQMGTKTDNHSLTLCRNACPWLSARCQQNTFRIHSNAETMSRTPASAWNGMVSWRRQR…	0.724679	2.46642e+06	error	50	17
EMBOSS_240_3	3	EMBOSS_240	ENSMUSG00000097928	ENSMUST00000181702	Medium	[S].PGPSGGTQALGPGAGSRFSR.[R]	PGPSGGTQALGPGAGSRFSR	GCACTCAATCAGGGCGATCCTAGGCTCGCACGGCGGCTGTCCACCGTTTCCCTCCGCCCACCGCGCCGACGCCCGGGCGCCCACGCCACCCTTTCCCCGACCACCCTCTGCGCAGCCCGGGCCCAAGCGGCGGGACGCAGGCTCTCGGACCCGGAGCCGGTTCCCGCTTCTCTCGCTAGAGGGCAGACGGGGCCCGCTCAAAGCCCTCAGACCGAAGGGCACGCGCAGCCGGTAGAGATCCCGCAATCGGAGCCGCACTCCGGGGCTGGGCTCCGCGACCAACGTGGGGTCCGAGATCAGAGCCCGGGAGCGCGACGCACGGCAGACCCAGAGGACCCGGGAGGAACGGCCAGCAATCTCGGGGTGCGCACAGCGCACGGGCACCAGGTGGAGGCGGCG…	TQSGRS*ARTAAVHRFPPPTAPTPGRPRHPFPDHPLRSPGPSGGTQALGPGAGSRFSR*RADGARSKPSDRRARAAGRDPAIGAALRGWAPRPTWGPRSEPGSATHGRPRGPGRNGQQSRGAHSARAPGGGGAGTAVRGPGWAPRELREDTRDAARCPPGSSGAAGTHLGSGRLRRARASRGIPGPSSCPSPCLCLLCAQTSR*R*ALYADPAGRR*RATSLVQGLAEKFVPGGKSQWPGCAGASPVACRERRGLDHLERPLRLGVSRGYSCVPGPAAAGSGVASLRWLSRSLTARRGKGAHSPVYARISRQLPPLRCVPLLLPARPGVPTSFGEVLAGSFSIARKLDAGASFAPSPSPRPLPLSPPHPHPEAQTRHREEPELGDHGSAPFFWQLGQPR…	1.41752	2146005	39	617	206.333
EMBOSS_259_2	2	EMBOSS_259	ENSMUSG00000113204	ENSMUST00000222064	Medium	[A].QLLSVPR.[S]	QLLSVPR	AGGCGGATGAACAGCCAGAGCTGCAATGGTGGATCCTCCTCCAGGGCTGCATGGGACGACAGATAGATGAGGCTCTAGGACGGGCACAAATGCTACCCGAATGCAAACCACTCCGGAGATCTGTAAAAGGACTGGCCCCGGACAGGAAGCACACTTTAAACTAGAGGCGGGGTAAGACTCGTGGGCCAATCAAGGCTTCCGAACAGAACTGCCATTCTGGCAATGAGGCGGGGTCTTCCGGTTGCCTGCTGGAAGTTTGTTTTTGCTCTGCAGGATTGAAGGGTTCTCCCTATGCTGCTTTGAGCGCTGCTATTGGGTGCCTTGAGGGGACCTCAAGTAAGCTCCATTTTTGAAACATGAGTCAAAGCCCCGGTGAAGATTCTGTGACGGTTCATTGTA…	EGTSSKLHF*NMSQSPGEDSVTVHCIIYDDED*VAFCGKEMLRYLRH*EICHADMHTGRGSTQTDENLQELDHLSP*KVKSTVSQTKVYDSVFALLCFLPCSNLPSLCADAYLLELEGVFCAIVCLKDITCVLIIKEVAIKSFP*VSKEALNISTV*ELLQTIGVIKVPLNAFSSQGEYEPLVPRVRMEFIERKCS*KS*CL*ILVCPSWLSLGSLQMLF*EEPFQIFFIRG*GLFVCRLNKFLSFSFLQ*FIYLLSWESLSHSRSPPS*SPCPQSSLILL*VAVCPPVCPPIMAQ*VSVPIGVSSLIKARQDSVLKGTDSKDSQEL*GQPVLQLLGDPHEV*AAYLLRMCQEP*SSL*WVAQLLSVPRSYSS*ACVVSPD**VCYSSWGVPTPLRLFS…	7.1318	10575946	363	7	2.66667
EMBOSS_113_2	2	EMBOSS_113	ENSMUSG00000021268	ENSMUST00000146701	Medium	[F].QTKPIQTR.[F]	QTKPIQTR	GACTTTTGGTAAATCACCTTTTGCCGTTTCCTTTGTCCCCGTGAAGCCCCCCCTGGCCGCCCCCTCCTCATTCTGGGCTGGCTGGCTGAGGGGGGGGGCAGCCTGAGGGCTGCGACGTGGCAGGTTTCTAGAATGTTCTATTGATGGCCGCAAGAGGGCGCTGGTGGCACTGCGGAATTTTGGGGGGCGGGGTGGGGAGGGAAGAGGAGGTGGCCTTTGTTCTCCTGCAGGAGGGGGTCGGGAGCGAGATGGGTTGCGGGACCATGGGTTCATTTACCTATGGGGAAATGTTAGTAGATACCTGGATTCACTAAGGTGCGCTTGCAGGACTTACAATAGGTCAGAGATGGCGTCATCTGCAGTGGCTGTGTGATTTAGGGTGTCATGGACGCAGATTAA…	ESQVVYPTERF*RPNYITHKKVPCKSPGNCKKKILN*PMRLSLLPSGQP*SLTTVSTQ*VLGVFVFNK*FPEFKQTNKQTNNIHSTNIF*DTDHVPSAPGYG*GTKTMRTVSFWRLISTLISTSTFFGLLNQPFLSRQDQKKKKNKNKKQNKTKNPKKQKTKQLGCFREARLGVDNGVQAPERG*LDYEANGGRRSTQETNAVGGDPL*VNQAD*RDLFCLAEWPGGALTSALLCAHGDWSYPGPSLATVHSFDAHNSLS*PRAGLPSRREAEVAKRFPTGPPHITLASRSLRF*QQWT*TCFQPASSSSSRDSWLHCAHLEPRQPASPCPPSSPLQCLSFLHSPGFSRPVYTRCFPSSPPISPPTHCFLTRSSPSNGSRSGLSRLPVPFAVVLRFHEL…	6.90162	930599	2050	133	44.6667
EMBOSS_353_2	2	EMBOSS_353	ENSMUSG00000073478	ENSMUST00000194375	Medium	[G].PTPSYMQAKHNVHKIK.[I]	PTPSYMQAKHNVHKIK	GGCCGCGCGCACGTGAGCGCGCCGCTCCGCCTGTCTAATTTTAGCTCTGAGGTGTCAGGGTCGTGCGAGGTGAGGCGGCGGGGTCGCAACGGGCTCGGGTGGGGTCCTCACGTGACTCCGTGAGGCGGCATGCTCAGGTGGGGGTTCCCCTCAGGACTGGGGGGCCGGAGTCACGTGAGGTGAGGCGGGTCGTGATGGGTTTGGGTAAGGGTCCCCTCGCGACGAGGATGGGGTTGCATGAGGTGAGGCGGCAAGCCCTGGTCCTCTTGGTGAGCGGGGTCTTCAGGTCACGTGAAGTGACTGCACAAGGTCTCCACAGCTCGGACACGGGACCCCTCAGGAGTGGGTCGCCAGGTTCATCTGAGGTGAGGCGTTGTGTGGGGTGTCCTCTCCGGGTCA…	AART*ARRSACLILALRCQGRAR*GGGVATGSGGVLT*LREAACSGGGSPQDWGAGVT*GEAGRDGFG*GSPRDEDGVA*GEAASPGPLGERGLQVT*SDCTRSPQLGHGTPQEWVARFI*GEALCGVSSPGHVGAPVGSVGRARGS*ARLCGQPLHCRSRAMSVREVWHLGLWATPLSTEASSRKSPGG*NLSEFKFR*CWVVMKTCEERE*TWWLTLRPAEETLARGLTKGLPISVSSLLNSRWFPACL*GVEEDMSVIQSNRVKDVWLDWKGRHLLASAQL*RQGVH*PPPSLPSHMRMTREGWCSRFAIMCGIRNQIKV*C*RNECQAPCKIGTAALSSESELFF*HTELFAMSQ*PAFC**GSLRFHMGCLCISCKMIASGLYGIGKLEVFNDK…	0.680472	986226	513	130	43.6667
EMBOSS_189_1	1	EMBOSS_189	ENSMUSG00000097457	ENSMUST00000181212	Medium	[T].VQDKMILDFK.[I]	VQDKMILDFK	ATGTAGACAAGAACCACTCCATGGGCTGGGATCCCATACTGAACAAAAAGAAGAGCACACGGTGAACACCAGCATTCCCTTCTCTCTGCTTCCTGTGAATGGAATGAGCGATGGGCTGTACAGTCAAACTGAGCTAAAGCCATTGCACCAACAATGAAAATCACCACCCTGTCTTTTCAAGACAATTGCTGTTATCATCAGTATCCATCGGCTCAGCTTTAACTCTCATCCCTGCTTCTGAATGGGGCAAATCATCGGGCAAAGAAGCCAAGCAATTCTGAATCATTTCAATGACTCGTTCCAGATGTTTCTGAAACCTCTCAGCTGTTTCAAGGCGCTGGCGTTTCTGGACCTCCATCATGACTCTCAAAGTCTCTCTTGCTTGGTGGGGTCGATATT…	M*TRTTPWAGIPY*TKRRAHGEHQHSLLSASCEWNERWAVQSN*AKAIAPTMKITTLSFQDNCCYHQYPSAQL*LSSLLLNGANHRAKKPSNSESFQ*LVPDVSETSQLFQGAGVSGPPS*LSKSLLLGGVDIHL*DDVHVQKVA*DLLAFLLVLYSQDFLLRCLKGLRN*SV*TY*VFSALSYDQIA*DEAVQCPDFLKGE**DHHIGTGCQTSCSCL*LEEEAWEPSLPEYFHLYIP*CTALEAVEVHSLAVVHPL*TIKNLKKQSTIQNRIMNTTFLLLPPISDFRICSSFF*QYTVQDKMILDFKINIYSSE*LSIMF*LNIMLTS	10.8175	2.94634e+06	300	1	0.333333
EMBOSS_139_3	3	EMBOSS_139	ENSMUSG00000097818	ENSMUST00000180851	Medium	[P].TPLTTQDLQRHK.[R]	TPLTTQDLQRHK	ACAGAGGCAAGCAGAGGTGACTTGGGGAGGTCCACCTCCTGTCAGGGTGCTATGCCTGCATGGGCCAGTAGGTTCTTCCAGACCTAAGTACACAGAGAGAGAGCTGTGTAACTCTCAGGGAAGCTCCTTCCTCACTGTCTGAGAGTTTCCTATTCTGGCTATGAGCATTCCCTACGCCCCTCACCACACAGGATCTGCAGAGACACAAAAGGACCAGGTATTTTCAGCACCTGTGGCCACACACCAACTCAGGTGGAACCACCCTGACCCCTGACGTGCGAGGGCTACGCAGCAGGGTCGGAAAGACAGCCAGTTGAATGGACCGAGAGCGCAAGTGACCCCGAGGCCTCCCCCCGGAGCTGTCTCCGGGCCCAGGGAGGTATCAGGCATTGGAACTGC…	RGKQR*LGEVHLLSGCYACMGQ*VLPDLSTQRESCVTLREAPSSLSESFLFWL*AFPTPLTTQDLQRHKRTRYFQHLWPHTNSGGTTLTPDVRGLRSRVGKTAS*MDRERK*PRGLPPELSPGPGRYQALELHHGEPRPSRAWGDQP*SVLRAKHISLAPLTLHGSLGPAGEVVA*PEADSDHTPRAQLSSAGPRQQSLNAWKQTPADAEKLSPPTCTLRHRVGRTALMRVCHGVCQPRRRNSHVLFGCLFFFLPVGGSGAPAYLGSF*QVLRCGRNRALS*LE*ELLQSHPSPRPSVGFPPASLHTRVASFTFKGIRDRICIHNRECGAIKRPLSLAIFSDVFLEATRLSAPNCSETLDVCP*FICLNISQVVFSPPNQDSASSCPRDGIYTLGCRTL…	2.82267	979189	58	52	18
EMBOSS_097_1	1	EMBOSS_097	ENSMUSG00000097033	ENSMUST00000180656	Medium	[W].TSYLYPSGVMTEPPLLCGQILLPSGVR.[V]	TSYLYPSGVMTEPPLLCGQILLPSGVR	AAAACTTTGGACTTTATTATGTCTAGTTGAAACCCATGAAAACAGTTATGTTCTTATACACAACATCTGAAAATGTAACTATAAAACCGAGTTTTCTCTTATGGATAGTGTAACAGAACAGCATACATAAAAAGGAAATGTCAAGTAGGAGCCCCATCACATTTCACATTTCAGCACGGTTGTCTTCCTGCCTGTTCCCCTGGAGAAAGAAGGGGTCACCGAGGGTCTAAGAGCTGCAGGGACAGCTGAGGCACAGCTCTGCTCCCCCAGCCCGAGTCCCACAAGATCAAAATGATGGAAACAGGAGGTAGGGGCCAGGCCAGTTCATGTGGCTGGAAGGCAGCAGTGGCAGGCACAGCTTCTCACTGGCTCAGTCTGGTTATTACAAGGGTATGGGAT…	KTLDFIMSS*NP*KQLCSYTQHLKM*L*NRVFSYG*CNRTAYIKRKCQVGAPSHFTFQHGCLPACSPGERRGHRGSKSCRDS*GTALLPQPESHKIKMMETGGRGQASSCGWKAAVAGTASHWLSLVITRVWDLHLGRWVIFPPNAPILGHVFWKHFRKFLNQ*AFKFLKTKIAVSKKIQVIHNTPHPRNPESNRDSHPKGWNQVTYLPQVNTQSQLLNVSN*LVKGTSPL*KGTVSLKQFLPFGLRRKHPTEHLQPGAPTAVERPSAGSTHPRILALTEAITHRNYTGHKCKHLPSFL*PWRGIIHFSSHLSLTVVLSSQKKSLLSGSQSQCHKDTCNPTATTEKL*LVPNGGMQASEVCLETVTGLR*EMAARAASAQGKLTT*APSMGNALQHGPR…	7.93733	7.12202e+06	error	19	6.33333
EMBOSS_239_2	2	EMBOSS_239	ENSMUSG00000097365	ENSMUST00000181331	Medium	[R].LEEIKI.[L]	LEEIKI	GAGCCTTCCCCTTTGTTTCCCTCAGTGATGCTAGGGTCTTGAAACTCAGCCCAGTACAATCATTGGTGTTTGAGCTGGCAACTGGGGGTCTAATTGCCAACTAAGATGGATATCTCTGGCTCTGGAGAAACAGCTGGGATAGGACATTGTTGCTTCTCTGCGGCAGGCAGCTCATGATGCAAATGCCGAGTTTGGACCAATAGGATTCAAACCTTGGTGGCTGCCTCCAGCATGCACTCTTTGCACTGCTCTGCTTCCTCCTGCCACTCTGGTGACATTTGCGTGGAGATAGGGTTTCTCTGTGCAGTCCTGGCTGTCCTGGAACTCACTCTGTAGACCAGGCTGGCTTAACGTTGATGAAGACACCCAAAAAGAAGATGGAACACCGGAGTGCTTTTG…	FPFVSLSDARVLKLSPVQSLVFELATGGLIAN*DGYLWLWRNSWDRTLLLLCGRQLMMQMPSLDQ*DSNLGGCLQHALFALLCFLLPLW*HLRGGQCHS*CGWWKSYGQEQRQHLVHQSPWQCAPEHATKANHTSWPAFPPLEDAVYNKQHPD*GTTTRNSKAFCSQLHSEEASPCLWMPSRLFTCGSNLNQL*GSYEQTVPLPHLMEVVCLSS*TRICFEMTRRVT*RKTCSDKKRLEEIKILLVSGFSRSLPTASLSP*GNE*YLQYSAAMLNRFLYVQFSPLFSEPSPVNATFVLQGS*SER*NRLFYRGSLLTLSPGLLAKCDVLVLGYQRWQTPNLVIFNCNGEQFGFK*FFQHT*SLKEFLESSTVMLFSRDDRPL*LGHGRFIREPPGHGTI…	1.58014	1921964	238	28	9.66667
EMBOSS_113_3	3	EMBOSS_113	ENSMUSG00000021268	ENSMUST00000146701	Medium	[K].KKSQPSLISQFLLGVLNSKPNQS.[K]	KKSQPSLISQFLLGVLNSKPNQS	GACTTTTGGTAAATCACCTTTTGCCGTTTCCTTTGTCCCCGTGAAGCCCCCCCTGGCCGCCCCCTCCTCATTCTGGGCTGGCTGGCTGAGGGGGGGGGCAGCCTGAGGGCTGCGACGTGGCAGGTTTCTAGAATGTTCTATTGATGGCCGCAAGAGGGCGCTGGTGGCACTGCGGAATTTTGGGGGGCGGGGTGGGGAGGGAAGAGGAGGTGGCCTTTGTTCTCCTGCAGGAGGGGGTCGGGAGCGAGATGGGTTGCGGGACCATGGGTTCATTTACCTATGGGGAAATGTTAGTAGATACCTGGATTCACTAAGGTGCGCTTGCAGGACTTACAATAGGTCAGAGATGGCGTCATCTGCAGTGGCTGTGTGATTTAGGGTGTCATGGACGCAGATTAA…	KARLSTPQSASEDQTT*LTRKCLVNRPEIAKKKSLISQ*GCPYCPAASPSLSQQ*APSRCWVSLCSTNNFQNSNKQTNKQTTFIQQTFSETLTMCPVHQAMAEVQRQ*EQSLFGG*LVLSFLPALSLAF*TNHFCPDKTKKKKKTKTKNKTKQKTQKNKKQNNWVALGKPGLEWTMVSRPLKGADWIMRQMEAEGARRRQMQWAETRSELIRLIEGTFSVLPSGPGGLSLVHCCVHMETGATLVPLWQLFIHLMLTTPCPDPGPACHHAGKQRSPSGFRRGPPT*R*PRGLFGFSSSGHEPVSSLHPPVPLGTPGSTVLTWSPASPPPPVLLPRHSSVCLSFTAPASRGLSTLAAFLPHLQFPLQPTAS*LALLHRTALAQACRVFLCHLLLCSGSTSC…	6.90162	5.53694e+06	2032	133	45
EMBOSS_318_1	1	EMBOSS_318	ENSMUSG00000116295	ENSMUST00000229245	Medium	[G].KMAAAVNQR.[G]	KMAAAVNQR	CGTGAACCAGCGTGGCCTTAACCAGCCATAGTTATGATATTATAAGACCTGTGGGTGTCTGCCTGACCTGTAGTCTGAAGATGCTCTTTCTGAAGTCTTAGGAGGGCCCCTCAGTGAGGATGCCCGAAGCTGAAGGCTTTACTTCTGTTTCAAGAGGATCCAAGCGGCTCCCAGCACCCACGCCAGGTGGCTCCCAAGGACGTGTAACTTCCCTTCCAGGGGATCCAGGTACACAATGCAGACGCAACATATAATCAAAAAAATATAGATGTATAAAAAGAAGCTGAGGCTAGCTCCTTCTCCCCACGCTCCTTCCCTCCCAACGGGAATGGCAGGGGCTTCTCTCAAACCTACTTTACATGTACTGCAGCC>ENSMUSG00000113204|ENSMUST…	RGKMAAAVNQRGLNQP*L*YYKAPFHVDLWVSA*PVV*RCSF*SLRRAPQ*GCPKLKALLLFQGSEQDVWSEDTQHRDRTVWCSHATSRVQTASKP*RPEPWTNMVDGMCALVPEVLLIMEANPDLNPGH*QDSWEPERYLNKGLAKWLSG*ERRLLF*RSRVQIPATTWWLTTIRNEI*CPLLECLKTATVYLHIIX	3.64102	1.45531e+06	3	34	11.3333
EMBOSS_227_2	2	EMBOSS_227	ENSMUSG00000097660	ENSMUST00000180864	Medium	[R].KKMTDPGQNFPLQAP.[H]	KKMTDPGQNFPLQAP	GGTTTTACGAGATAGGGTTTCTCTGTGTAGCCCTGGTGGCTGTCCTGGAACTCACTTTGTAGACCAGGCTGGCCTCAGAAATCCGCCTGCCTCTGCCTCCCAAGTGCTGGGATTAAAGGCGTGCACAACCACGCCTGGCTCTGCTTGTGGGTTTTCTAGTCTTATTTTATGTGCATCCATTTCTTTTCCATGTATGTATATGTACCACACGCATGCTGGTGCCCACAGAGGTCAGAAGAGAGCATTGGAGCCACTGGAATTGGAGTTATAGACAATTGTGATGCACTGTGTGGGTGCTGAGACTTGAACCTGGATCTTCTGCAAAAGCAGCCAACGTTGTTAACTAAGGAGGCCTGGTGCCAGGCACAGGAAAAAATATTTAGTTGCTCAGCTTCTCAC…	VLRDRVSLCSPGGCPGTHFVDQAGLRNPPASASQVLGLKACTTTPGSACGFSSLILCASISFPCMYMYHTHAGAHRGQKRALEPLELEL*TIVMHCVGAET*TWIFCKSSQRC*LRRPGARHRKKYLVAQLLTQSRTHKL*EKNTFLI*VHTAFLPVYEVLGHTPLLFCI*KQCHHSPPGWPPECWVTGCATTPDQ*LTVQ*QDNTATVTDNPDKGGEVFFWLLFLLYCVIF*YMDLNNDQVRVTGISIVSNSYHFSL*ELACHMPGSLALTSDSPTSASPLLRPAAATLA*LYSLLLRGPVSGSRIPHWDRHWLAVFCLPFHWVF*FETGSPHIAQAGPGLANLPTSGSLC*DYRHDPPHPSCAF*TKNTWSV*SQPIQEPALTGCHPAIAMEGD*HR…	29.1976	85039330	error	169	56.6667
EMBOSS_217_3	3	EMBOSS_217	ENSMUSG00000097309	ENSMUST00000181277	Medium	[K].GKAIFQMELGFKSL.[I]	GKAIFQMELGFKSL	GTCTCCAACCTCTTCCGCTGCCTGCGCTCACGGCACTTACCTCCACAGTCGGGATCGGCGCAGTCAGCTGCTCCGGAGTCAGGCTCCCGAACTCCTCGGCTAGAACATCCATTCCATTCACGGTAGAGGAAGAAGTCGGCAGAATGTTCACATCCGCCCGTGCGGCTCCAAGCAAGTAGCACGCGGAGAGTGGTGTGCGTTCTCCTCCGGTGTCCCCGTGGCGCTTGTTTACGGGGAGGCGTTTCAAAAGGTTCCGCCTGGTCAGGGCCTAACCTGCGGAGGAACCCGGAAGTGACCGAGCCGGATGTGGAAAACTACACCCACTGGTGTACTTCCGAGGTCTCGCCGGGCTAATCCTAGCCTCTTGACAGGCTCATTTCCAAAGGAAACGTCAGAGGG…	LQPLPLPALTALTSTVGIGAVSCSGVRLPNSSARTSIPFTVEEEVGRMFTSARAAPSK*HAESGVRSPPVSPWRLFTGRRFKRFRLVRA*PAEEPGSDRAGCGKLHPLVYFRGLAGLILAS*QAHFQRKRQRDGVCYHYTE*TKDCT*SSHGSTDTYNPSI*KLEVGGHPEIQGHPWLPNKVEASLGYMKPCLQRKGNVLITLIGERFQGWQRRKHKNC*KLYSINF*KIRYTYKKSL*IVNTQLVEDKRICH*NWK*VHASPMVRKIPWEEEVKDANSF*MSFSLGTYKNCGDGWCHMSVYNAPGHLIVELFNSSPV*LAPSNNMCSFFFLNLVQGNLRTELAS*ISVLVSKRCADRLLKLSEERKKKITGHQDGSVC*VTCHKA*KAAFSPQDPHCR…	4.21591	2.18868e+06	866	144	48.6667
EMBOSS_139_2	2	EMBOSS_139	ENSMUSG00000097818	ENSMUST00000180851	Medium	[M].KRWGTQGVSGWMLTTECGDTVEGWQSLLVPR.[N]	KRWGTQGVSGWMLTTECGDTVEGWQSLLVPR	ACAGAGGCAAGCAGAGGTGACTTGGGGAGGTCCACCTCCTGTCAGGGTGCTATGCCTGCATGGGCCAGTAGGTTCTTCCAGACCTAAGTACACAGAGAGAGAGCTGTGTAACTCTCAGGGAAGCTCCTTCCTCACTGTCTGAGAGTTTCCTATTCTGGCTATGAGCATTCCCTACGCCCCTCACCACACAGGATCTGCAGAGACACAAAAGGACCAGGTATTTTCAGCACCTGTGGCCACACACCAACTCAGGTGGAACCACCCTGACCCCTGACGTGCGAGGGCTACGCAGCAGGGTCGGAAAGACAGCCAGTTGAATGGACCGAGAGCGCAAGTGACCCCGAGGCCTCCCCCCGGAGCTGTCTCCGGGCCCAGGGAGGTATCAGGCATTGGAACTGC…	QRQAEVTWGGPPPVRVLCLHGPVGSSRPKYTERELCNSQGSSFLTV*EFPILAMSIPYAPHHTGSAETQKDQVFSAPVATHQLRWNHPDP*RARATQQGRKDSQLNGPRAQVTPRPPPGAVSGPREVSGIGTAPRGTPSLARVGRPTVVSPPGQAHFAGPAYPARLPRPRRRGSGVAGGRQRPHTARPALQRRSASTEP*RVEANPSRRREAVSAYVHFASPGGQDGVDARVPWRLPATQAQ*PCALWVFIFLSASRGLWSSCLSWILLTSPEVWEEQSLVLTRVGVTSISSITSSFCRLSSCIPPHPSCFFYFQGNS**DMHSQ*RMRCYQASFILGHIF*CLPRSHKVVSS*LQRDSGCMSLIHLSEYLPSCLFPTEPGLRFFLPT*WHLYIGVQDT…	2.82267	215994	error	52	17.6667
EMBOSS_344_1	1	EMBOSS_344	ENSMUSG00000112964	ENSMUST00000221334	Medium	[V].KEVSNIIK.[E]	KEVSNIIK	GGAAGTTTGTTTTTGCTCTACAGGATTGAACCGTCTCTGTGTCTTGCTTTGAGCGCTGCTGTTGGGTGCTGTGAGTGGACCTCAAGTAAGCTCCGTTTTTGAAACATGGATGCAGTGACTTATGATGATGTGCGTGTGAACTTCACTGAGGAAGAGTGGGATTTGCTGGATCCTTCCCAGAAAAGTCTCTATGAAGAGGTGATGCTGGAGACCTACCAGAACATCACTGCTATAGGCTACAATTGGGAAGACCATCATATTGAAGAACATTGTCAAAGTTCTAGAAGACATGAAAGGAATGAAAGAAGTCGTATTGGAGAGAAACCCTATGAATGTTATCAATGTGGTAAAGCCTTTGCACGTCACAATCATCTCCAAATACATAAAAGAATACATACT…	LAGSLFLLYRIEPSLCLALSAAVGCCEWTSSKLRF*NMATSGKTIILKNIVKVLEDMKGMKKFILERNRMNVTNVVKPLEVTIISKYIKEQILERNLMNVINVVKPFHNRVVSSIIKEHMLDRNLMNVISAVKPCHVKEVSNIIKEHILERKLVNVISVVKLL*DPVNSKNIKEHILGRNPMNVISVVKPLHITIISNIIKEHILERNLMNAINVEKPLQFSIVSNIIKEDILERNLMNVMNVVKPLHFSIVFNTIKVHILERNLMNVINVVKHFHITIISKTIKEYIVERNLMNVINVVKLLQEPVNSKPIKEHILERNLMSVINVVKPLHFSIISKNIKEYILERNLISVLNVIKHFHNTVVFNIIKEHILERNLMSVINVVKPLHGNIVSIYIKEY…	4.78988	265167	138	106	35.3333
EMBOSS_200_2	2	EMBOSS_200	ENSMUSG00000097566	ENSMUST00000181251	Medium	[K].NLAVTGQNHLCWAIWQLKLQL.[L]	NLAVTGQNHLCWAIWQLKLQL	GGACCCGGGGGCGCGCGGGCCCTTGCTAGGACGCAGAGGCCGAGCGCACCTCAGCGCCCATCCGGAGCTGCCCGCTGCCGGGCAGCTCTCGGGGTCGTCGCTGCCGGAGTCACTTGGGGATGGACAGCTGATCGGCTGGTCCGACTCCCCTCCCTCCACCGCGCAGCAGCCCCGCCCGGCCCCCTACCTGGCACAGCAGGGCAGAGACCACGGCAAGGGCTAGCGCGCTCCGACGGCCCATGGTACCGCTGGACGCCCTTGCTCTCCTAGAGTATCCTCTTTTCTTTCTTCTTCAAAGACCCAGGGATGCCAGGAAAGTCTATATGACCCGAGGAGTACTGGCGGAAAGGCGTCTCTCGGCTCCAGCTTCTTCGCGGAGGGAAAGAGGAGAAAGGAGAT…	DPGARGPLLGRRGRAHLSAHPELPAAGQLSGSSLPESLGDGQLIGWSDSPPSTAQQPRPAPYLAQQGRDHGKG*RAPTAHGTAGRPCSPRVSSFLSSSKTQGCQESLYDPRSTGGKASLGSSFFAEGKRRKEIRHRGKRAQMFSLIPKRACSGFLRRPIRKRRSGNPTGEAIIRGPEGRGGNGGGKDCGARPGFPARRHSAAAAAPRVF*TGISCTIAKPRVFLKNSANAMREHTPRTGGRSVGGSVPHRCSPVTCPGQTG*PRVHAGGSGPGWRLPPLNPAGRSHN**DANEQPPNLARAVTKEPLFQTLLSMDRQMVSEL*NVQPSSPPPTSPPPSPLCLRPRPFASLPQRKTRSFTFLQNVPGDEPLCSRSWS*GRVAHRPTATGPKTLGTLGGLS…	1.35522	251519	736	120	40.3333
EMBOSS_176_3	3	EMBOSS_176	ENSMUSG00000101966	ENSMUST00000186108	Medium	[G].KVESNILK.[S]	KVESNILK	GCGAATAACAATTTTTATTTGTCCTGTTATTTCTCCAGTTAGGGAAGTAAGTAGAAAGTAACATTTAGTTGAAATCAAATATCAATATAGTATCATTTCTTTGCCACACATTATCTTCTAATATAGTACATATTATTAGTGCCATAGATAATCAAGAGGGTAGGCTTCTGCAAAATGTTAATTGTATTACAGAAAGAGAAAGAAAAATGGGACTCAAGTGGGTATCTTTTTATAATATTGCCCAATGATTTCTCATTTGGGAAAATATGAGCATTGTGATAAGAAAATGGATGGCAAAAAACCTAAGTTGAAAAGTAGACAGGCATGGTGTTGGAGCAGTAGCTGAGAGCTTTACCCCTACGGTTCCCTGGCTAAGGCTATGCCACAGTACAACTAGTA…	E*QFLFVLLFLQLGK*VESNI*LKSNINIVSFLCHTLSSNIVHIISAIDNQEGRLLQNVNCITERERKMGLKWVSFYNIAQ*FLIWENMSIVIRKWMAKNLS*KVDRHGVGAVAESFTPTVPWLRLCHSTTSNVSKNTKQQIFAIHFLITCFLLSFSPHSENLYSLPRSCCCCCCCCCCCSCWF*CGCCCHCLQLLFFFPLEQ*DPHRVHSTSSCWPDLPLMSILYHALFQKISKLTVDHTFLIASYSVSSVLVVHTNNPCHPSRFVTSIVMSNTPLI*SSQNLLKEILFHFHCIEAFCF*F*KEWRRGKIFRNTCLDKNWAMELIFSSKDRFPKPYVVYTFHAFLLWLMNQFS*FYFFSP*SLSKYV*NVGKAPLC*HLQDLRITSVGKHCSLCL*TS…	3.29105	265167	error	175	59
EMBOSS_360_2	2	EMBOSS_360	ENSMUSG00000110605	ENSMUST00000212145	Medium	[K].EKTGGIIDK.[K]	EKTGGIIDK	TTGAATGGTCCTGTGTGCTGTGTTCTCTGTCCTGCCTCTGGATGCTGTGGAGGGTGCTCAGGCAAGCTCCGAAGTTGCGACATGGATGCATTGACCTATGATGATGTGCATGTGAACTTCACTCGAGAAGAATGGGCTTTGCTGAATCCTACACAGAGGAATCTCTACAAAGTTGTGATGTTGGAGATCTACAGGAACCTCAAAGCTGTAGGATACAATTGGGAAGACCAAAACACTGAAGAACATTGTCAAAGTTCCAGAAGACATGGAAGGTATATCCTGTGTCACAATGGATACAAGCCATGTGAGCATAGGGATATTGAAAGAAGCAGAACCTTCTCTCTCTCTCAAAACAATTAAAATATATGTAATAGTCCACATTTGAGCAAACTTTGTGAT…	SCVLCSLSCLWMLWRVLRQAPKLRHASKPRG*YLWRYVSARSSAIKLPHVFASRRSLMILWVRAIS*LEWGYPHGGLSFGGSTKICVTPRNPEDPLEALQQKRPAVQAHGPGVLGPTSEMASATLHRHLPHHHHIPQRPRDGRRRGAGPAGFTSALTRFPESGCTRVTAPTSPTPDPGPRCCRQTDRKKKKRLWEWPARSTASSLAASDTCLIIFPFPLHPTCPSPGFGSSRVPLVSRKSAFTLRCQWPSWAPFAAPCVLSGGSALSCWQ*VCSKFHRGRHLPTWGFSCPR*GASVSLTARL**WSHLCGDKKCPNNLTKIIKNYRS*KKTG*VGKKVQRKKNKRKKRMKKTDVYRGLERSELRL*ERAKLQQTQER*MTVTNREVNSKEK*RREREAR…	3.12889	9.5064e+06	406	5	2
EMBOSS_105_1	1	EMBOSS_105	ENSMUSG00000098292	ENSMUST00000175753	Medium	[R].GAVQNWTWPSLVP.[V]	GAVQNWTWPSLVP	ACTTGGCTTCAACACAACTAGACTGACGAAGGCTGCTCACCACGGATGAAGACGAGGTAAGGCCGGCACCTCAGAAGTGAGGTCACGCAGACCTACTTGCACATGCCATGGGAGGAAGGAAGGTCCACACTGGTCCAGTGTGAGCTGCCTGACTCCATCCTAGCCAGTCCCTTGTACTGCTGCTGCTGCAGGAGGTGGGGGAGCCGGCACTGCTAGAAAGTCCTGTACGTGAGGAACTCTTTCATCTTCTTGGGGATTGGCAGTGCTAGGATTTGATACGTTGTCAGGAAACTTCGGAGGGCTTTCCCGAATAAGTGCTTCAGTGAGGACAGGACCCGGGGAGCTGTCCAGAACTGGACATGGCCATCTCTCGTCCCTGTGGCAATAATTCCACCGTGT…	TWLQHN*TDEGCSPRMKTR*GRHLRSEVTQTYLHMPWEEGRSTLVQCELPDSILASPLYCCCCRRWGSRHC*KVLYVRNSFIFLGIGSARI*YVVRKLRRAFPNKCFSEDRTRGAVQNWTWPSLVPVAIIPPCGKNVQQRSLVIGAKTTGAVSSRAQILSSPSSATVARYKPSGEKHTDLRELMWMSLSSMAGSSCV**SDLNLSSV*GSHIITLVSYDAVTSKAESGEKSQETTLL*WPSSFWISV*DRMLHRKTDFSPAAEHSMLQSGEMEQQ*THCRWPDNTRICLPCLFRSQMRSVLSRDAETKIKLPLGAKLRSLTPSWWHLFDSEAGALSVPPKF*SAHR*DLWPGSGKRHQAPGDGDVPRVSCWVERATG*RPAPTQSGHTPASSPSDCPVL…	4.81508	270718	114	46	15.3333
EMBOSS_173_1	1	EMBOSS_173	ENSMUSG00000097479	ENSMUST00000181481	Medium	[H].LCTPNNLSR.[R]	LCTPNNLSR	TCCTTTCGGTTCCGGGCGGTGGACCGGAAGAGCCTAGTAGTTTATTTAGCCGAAATTGGTGGGATGAGATCTGTTGACAGACCTGACAGGAAAAAGGACCCTGGGACGCCAGCCTGGTAGGGAAAGATTTGGGGTGGAGCCCAGAGAGGACCAGAAAGCAAGAAAGCCTCTACGCTATCCTGAAGAGTTTTTCAGAAAAAGGAGCTGGAGAGATGGTTCGGCATTTAAGTACACTGCCTGCTCATCCAGAGATCTGAGTTTGATTCCCAGAATCCACATGGCAGTTCACAGCAGCCTGGAGAGTGGAGAAGTCTTCCATGTTAACAAGCAGCTTTAAGTGGTCACACGCGTTTACTCCGCCCGCTTCTTGCTTGAAACACCAGAAATCTGATATATACT…	SFRFRAVDRKSLVVYLAEIGGMRSVDRPDRKKDPGTPAW*GKIWGGAQRGPESKKASTLS*RVFQKKELERWFGI*VHCLLIQRSEFDSQNPHGSSQQPGEWRSLPC*QAALSGHTRLLRPLLA*NTRNLIYTD*SNCNQITLAILVVHWDLL*RQTTIQQLETLLTELFKDSCKNKKMSSQT*IQEPFGC*HQFKSCAK*VTVPVPHP*ELPFFPLKIAVSALRFTCRLGESDCF*NVTKCPPRCLTFPRTE*LWFYSSHWS*KKSQLETQWTSPFKHT*LPPSPTEHRC*LKNKINNKHPFY*FERYCNFYTSMIFFNVLQLCGFAVQQFIDHTVQDHQQDWNDVIEGTIMLITLPENRIQEGQLSLDTA*RREGRSVLSSHPSIPVLKRANRKLTK…	21.2351	4.494e+06	951	64	21.3333
EMBOSS_007_1	1	EMBOSS_007	ENSMUSG00000078308	ENSMUST00000089534	Medium	[R].LQNWLLGLMMAQARGV.[R]	LQNWLLGLMMAQARGV	AAATAATTGTATATCCATGTCTACACCCAAGACATGGAACTAGCCTAGAGTCCATCAATAGAGGAACAAATAAAGAAAATTGGGTGCATATACGCAATGGAATTTAAGGCTGCTCTGGAGAACAAAGCTATCACTGGTGAACTCAGGATGCATTGACTGCAGTGCAGAAGAGAACTCAGGATGCATTGACTGCAGTGCAGAAGAGAACTCAGGATGCATTGACTGCAGTGCAGAAGAGAACTCAGGATGCATTGTCTGCAGTGCAGGAGAGAACTCAGGATGCATTGACTGCAGTGCAGAAGAGAACTCAGGATGCATTGTCTGCAGTGCAGGAGAGAACTCAGGATGCATTGTCTGCAGTGCAGAAGAGAACTCAGGATGCATTGTCTGCAGTGCAGG…	K*LYIHVYTQDMELA*SPSIEEQIKKIGCIYAMEFKAALENKAITGELRMH*LQCRRELRMH*LQCRRELRMH*LQCRRELRMHCLQCRRELRMH*LQCRRELRMHCLQCRRELRMHCLQCRRELRMHCLQCRRELRMHCLQCRRELRMHCLQCRRELRMHCLQCRRELRMHCLQCRRELRMH*LQCRRELRMHCLQCRRELRMHCLQCRRELRMHCLQCRRELRMHCLQCRRELRMHCLQCRRELRMHCLQCRRELRMHCLQCRRELRMH*LQCRRELRMHCLQCRRELRMH*LQCRRELRMHCLQCRRELRMH*LQCRRELRMHYLQCRREDISFLGRCAATLLMVFKRVGRAP*APPVIMGLWAGNCEEDAQC*GLSWDRDSSATEGLSLALSVLV…	1.16787	1.84956e+06	1072	17	5.66667
EMBOSS_076_3	3	EMBOSS_076	ENSMUSG00000091514	ENSMUST00000167899	Medium	[K].EANTMLSRNHQLFCIQ.[T]	EANTMLSRNHQLFCIQ	AGACGTCGGGCGCCGGGCACGCGCCGGGCACGCGCTAGGGGCGTGGGGGACACGCACGGGAGGCCTTGCCTGCGCTGAGGCTTTGAAGGAGGAAAATCGGACCTTCTGACCCCTCATGGGTCCCGGCAACCCCGGTGGGCAGGACTGGGGTGACTGAAGGCTCTGTCTGTCTGTCTGTCCTCCATTCCCTCCCTCTATTTGGATTGAGAGGCTGTCAAAGTTATCCCTAAAGCCTAAGAGATCTGACAAGCAGCAGCCTACAGACACCTTGGCTTGCGTAAGGAGAGGTCTACTTGGCAATACTGACAACTCCAGTTTCCTATTCTGTTCAGTCATCTGAGAACCGGAAAGAATCTTGTCACTGCTGCTTTCATTCCTCTGCCGGCTTTTCCAGTTTTT…	TSGAGHAPGTR*GRGGHAREALPALRL*RRKIGPSDPSWVPATPVGRTGVTEGSVCLSVLHSLPLFGLRGCQSYP*SLRDLTSSSLQTPWLA*GEVYLAILTTPVSYSVQSSENRKESCHCCFHSSAGFSSFFPLSSFRSGESWNVLLLVTTGVSKDGN*PN*RVLWPNQSQAPLHSKLFHSPFFSNFSSMAWILQTASFLA*RTESWPPVSTESSSKSSFVSISSRSQYALSVFFPTNSSTSCSRNCTFSSTCMIFLILGGVPSSEEKHSSGRLLLGTWLLGCSLLALPYN*GSALYWT*ESKRSELSLFTAPGDSY*WTLQGKLCRLRP*PDGL*EYEGSLKWEDRKETEAVLVGSYQHQICQCASFTNQERTEKTSTEPSETNTVRRQRESPLKQE…	5.85835	834444	error	116	39.3333
EMBOSS_255_3	3	EMBOSS_255	ENSMUSG00000112674	ENSMUST00000219154	Medium	[K].ILLVYAMVSAFGGLWDASNSEHQAWQQ.[A]	ILLVYAMVSAFGGLWDASNSEHQAWQQ	AATCTCCTTTCCCTTGCTGTTCTTGACAGCGATTGGATAGTTCATGCTATCCTTACTTCTTGAAGGGCTTTCTTTAGCTATTTCAATACCTTTTACCTCAAAATCTTTCAAGATAGAGTCACCTGCTTCTTGGAAATCCTGGGCAAATGACAAAGCTACCTGTTGGTAGTTCACAATGCCAGTGTATGGACAACCAATAGCCATTAGACCCCTGCAATACGGCTTCTTCTTTTTTATATCCTCCTGCTGGATCAGCCTCAGGCGTTGGACTCCATTCTGCAGGCCTCTCTCATACAAGGCCTGAAGTCTGGGAATTTCTTCTTGTTCAACAGCTACTATTAGCTTGCCACATTACCTGTAGGGAATTCCCTTGAGGTTGCAGTACTCATAGATGAGGGC…	SPFPCCS*QRLDSSCYPYFLKGFL*LFQYLLPQNLSR*SHLLLGNPGQMTKLPVGSSQCQCMDNQ*PLDPCNTASSFLYPPAGSASGVGLHSAGLSHTRPEVWEFLLVQQLLLACHITCREFP*GCSTHR*GLRLLHTM*LSEILVYSKSHCV*CRCCVQSGEELNLSPFPPHQSKVRDVSG*AFWQRQGPQFHLQ**LYQKSWCWSSCGHHRTVAQAPQTPA*SHKRQLYQGPFSKILLVYAMVSAFGG*LWDASNSEHQAWQQASWARSHLTRPCVDSSGCQNSENYQPVQGCHLMWLGTQHYPLPPADTQYESTMPMLTQTERFER*LDLLLTSGILL*R*TQWYSSEGGGYRRRRHRHHHHHHTCLCRCLKWPEEGTGSLGVEL*GAG*ACMDPN…	1.77413	337112	error	44	15.3333
EMBOSS_109_1	1	EMBOSS_109	ENSMUSG00000097154	ENSMUST00000180468	Medium	[R].NVKFPASTLGSLLHIQRSTSLASIG.[T]	NVKFPASTLGSLLHIQRSTSLASIG	GACTTGAGGCAGGAGCTGACCTAAGAGAAAACAGCCCGTGAACCCGTGCGGAGAGAGGCTGCTGGAGCTCCAGGACCTACATCTGCCTGGACTGTGTTCTGGAGGCATCAGAAGAGATTCCACCCAGAAGAATACATACTGGAAGGGACCACATCTTGAGAAGACAGCCATTCATCACATGGGACCCAACGTACCGGGGCTCAGAACACCCTCTTCCCAGGATGAAGGACATCAATGACCATCTGTTTCCTCTGAAGCAGACGGTTGGTCATGAACTTCCTGGTCCGGATGGTTACTGTGTCATTCATGATGGCTACGGCGCTGGAGCTGGAGAGCAGGTTCATTCTTTCTTGCTAAGAATGTAATAGGCTCACTCTAAAAATTATAGCCACATGGAAA…	DLRQELT*EKTAREPVRREAAGAPGPTSAWTVFWRHQKRFHPEEYILEGTTS*EDSHSSHGTQRTGAQNTLFPG*RTSMTICFL*SRRLVMNFLVRMVTVSFMMATALELESRFILSC*ECNRLTLKIIATWKI*GYVKTEWLETGWAAATLCPSYSHYSPCINLVRPTQRYMFAHSFRKQLGGDDH**NYG*QPG**P*K*EEG*NGKTLVKGKPWDPKD*HSLSLSLSLSLSLSLSLGR*TGGKANRLTDHHIIVQILSGLV*CFE*EWPS*VLVLEY*VSSW*NCLVRIRRRRLVIESVLLGGI*AFRSLCHTQFSLSSSLLPSFLPPSLSPLLYGCVSRCKPSAMAPCHACLPAAVPHAFPIMMVMGSFFETVSRKFPFVSCCGHGVFVMAIEK*…	33.1354	1.29363e+06	error	179	59.6667
EMBOSS_300_2	2	EMBOSS_300	ENSMUSG00000116384	ENSMUST00000230786	Medium	[T].QEELNFR.[S]	QEELNFR	GTTGATGACTTTGTTGTTTCAAGCCAGCTGATACTGTAGCCAGAGGACAAACACCTGCAGAAGTTCTCTTATGGCTAACAGTTACTTTTGGCTCTTAGCTAACCACATGAAAGTGCTGTGGAGAGAGACGCTGGGGCAGACCAATACTGAAAAAGGAATGGAACAACTTCAGCTGATCTTGTAAGGCTGAATAGCTGAAATCAGAGCCTTCTCTGCCTCCCACTTATGTAGTCGCAGATCTGAATGCCACCTTGGAAGACTGGCCACTGTTCAGGACCTTGAAGATTCAGCCTGGATCCTCCCAGTGTAGACACCAGAGCACCAGAGGCATCAGGGCTCGAATCAACCCTCCCACCCTGGAGAGATGTCTGAAGCAACTCCTTAGTGGAGTCTCTCTCT…	LMTLLFQAS*YCSQRTNTCRSSLMANSYFWLLANHMKVLWRETLGQTNTEKGMEQLQLIL*G*IAEIRAFSASHLCSRRSECHLGRLATVQDLEDSAWILPV*TPEHQRHQGSNQPSHPGEMSEATP*WSLSLSSW*LAIYPVVKIRQNLGLFPISPHPAFQLREH*RDSFLLLFIPSIYSFSAQESTL*FQYIELGDTGSVRTLQGTEG*LWFLEYVSYPKCLDFLNLKILCIFMESMEKMEAPMQIHKPEILASLRRGSPFLGLCPRGPEKC*SSKSKEVTGS*LLFCSCWVGPKQTSNH*RPVICNQICT*GLLAIFKPVFISKPDVLQIVSQPCFL*LCFFSCSSAYLKHTKKLTRSWWISDACFNAPCFARAAGLIFF*FQYFPLFLSIRLV*I…	0.986698	9.16052e+06	580	5	2
EMBOSS_309_3	3	EMBOSS_309	ENSMUSG00000102887	ENSMUST00000195480	Medium	[T].NERQRQR.[Q]	NERQRQR	ATCTGGCTCTCCTACACATCGCTGGCCACCCAGTGAGAGCTGGGACTCCAGCTTGGAGACTTTGCGCTCCTTCTTGGGGACGTCCTGCACGGGAGAGCATGCCCTCTCCAGGCACAGCTTCTTGGGGAGGCGATGCTGGGCGCCGGAGATCTGGGCTGAGGGGTATTTACATCAAAGGTAACATTCACTGAAGGGTGGCTGGTGAAGCCTCGGGTTCATCATCTCCACAGGGGCTGGGCTCTCAAAAACCAGGCGGCTGACCGGCTCATTGGTCTCCGGAGGCAGGCTCAAGGTTTCCTGGAGGATCATCGGCTTCTTTCTTAGGCTGGCGATCTCCTTGTCAGCACTTTGTAAGTCCTTCTGGGCTGACCTCAGTTCTAACTTGGCCTGATCCAGCTC…	LALLHIAGHPVRAGTPAWRLCAPSWGRPARESMPSPGTASWGGDAGRRRSGLRGIYIKGNIH*RVAGEASGSSSPQGLGSQKPGG*PAHWSPEAGSRFPGGSSASFLGWRSPCQHFVSPSGLTSVLTWPDPAQC*ESSTCS*RTPNPFSTCQPAPLRPSKLPSDSHTLS*GTRSTQPAALPLTVPHLCLGSSPPPQLNLLHGFSSCT*VGGPLAAAPGTSSVFSGWNIASLPCLKRSAGTPQWHCVLPGCPVECR*WPGCPISPCLSGKAEL*HSPVHSLRILNPRHSPLPGRG*RKACL**SFCQPGFYPVGRSDLVLSQTTGLGIADEKCGHSIWQPCHGSD*RSRSR*CTERG*A*WLDSSSPESQLPTTDTVWWPNPPPPLWFLQILLHRTASGS…	4.69048	8.80296e+06	712	99	33.6667
EMBOSS_097_3	3	EMBOSS_097	ENSMUSG00000097033	ENSMUST00000180656	Medium	[E].AGTVQCSAR.[A]	AGTVQCSAR	AAAACTTTGGACTTTATTATGTCTAGTTGAAACCCATGAAAACAGTTATGTTCTTATACACAACATCTGAAAATGTAACTATAAAACCGAGTTTTCTCTTATGGATAGTGTAACAGAACAGCATACATAAAAAGGAAATGTCAAGTAGGAGCCCCATCACATTTCACATTTCAGCACGGTTGTCTTCCTGCCTGTTCCCCTGGAGAAAGAAGGGGTCACCGAGGGTCTAAGAGCTGCAGGGACAGCTGAGGCACAGCTCTGCTCCCCCAGCCCGAGTCCCACAAGATCAAAATGATGGAAACAGGAGGTAGGGGCCAGGCCAGTTCATGTGGCTGGAAGGCAGCAGTGGCAGGCACAGCTTCTCACTGGCTCAGTCTGGTTATTACAAGGGTATGGGAT…	NFGLYYV*LKPMKTVMFLYTTSENVTIKPSFLLWIV*QNSIHKKEMSSRSPITFHISARLSSCLFPWRKKGSPRV*ELQGQLRHSSAPPARVPQDQNDGNRR*GPGQFMWLEGSSGRHSFSLAQSGYYKGMGSSLRTVGDLPPECSDTWPCLLETL*KVPESVGF*ISKNKNSCVKKNPSYTQHTPSKEPRIQPRQPPKGMEPGHLSSTS*HPESTTQCLQLTC*RDVTSLKGDCIFKTIPSFWLKKETPD*APPTRCSHCSGEAVCRQHTPQNLSAH*SNYSPELHRSQVQTSPKFSLALERHYPLFQPPIPHSGFIQSKKVSTLRVTEPVSQRHMQSHCNN*KTLTGAQWGHAGLRSVP*DCHGSQVRNGSKSGKCSGKINHMSTING*CTPARPKA…	7.93733	1.06709e+06	896	19	7
EMBOSS_162_3	3	EMBOSS_162	ENSMUSG00000097152	ENSMUST00000181141	Medium	[R].ARGGPSGWGFPPGSKPV.[M]	ARGGPSGWGFPPGSKPV	AGCCATAGGCGGCAGGCTGAGAAAAACAGGCATGAGTGACCAAGGTGGTAAAAGCGGTTTAAAAAAAAAAAAAAAAAAAACAGAACCCTGCTCTGCCTGCCTCAGCGGTCTCTGAAAGACCTTGCCCAAAGACAAACCAACCAGCCTGGTTCATCAATGACAAGAGTGACTGAGGTTGGACAACAGCGGCAACTCGGGCGGAGTTTGAACTGGACACACAGGGAGGCAGTGCTCTGGCGGGGCAGTACAAGGCAGCGATGGAAACAAGACACAGATGTCTTGGCTCTGACCCTGCGGCGCCCCAGATCCTAGGCTGACCTGTGACCCCCGCAGCCCCTGCCCACCCCCATCCAACACCACCACCCCGTCCTTAGAGATCGCGCAGCCGGCGCGCTCGAG…	P*AAG*EKQA*VTKVVKAV*KKKKKKQNPALPASAVSERPCPKTNQPAWFINDKSD*GWTTAATRAEFELDTQGGSALAGQYKAAMETRHRCLGSDPAAPQILG*PVTPAAPAHPHPTPPPRP*RSRSRRARGGRKVPPDPLTAPRNPRS*PRARRRKRATLEGGRRRTKVFLGRA*RGGPSGWGFPPGSKPV*MPFSREGKGSTSAWLEK*NNLIKMCRLGMHQGATQQVITADA*IVPAPTQCY*AGPCLAHGTNPGIGRSQMLSQLHHWLCGVWTIKFPSICYFQKLLQFPDAVVFNDIKPSHYVALTRLEISLVYILPDAGIKGVYHX	1.7423	4.92534e+06	error	32	11.3333
EMBOSS_308_3	3	EMBOSS_308	ENSMUSG00000110567	ENSMUST00000212293	Medium	[R].LNKHRAFPGQ.[D]	LNKHRAFPGQ	CCACCCCCCCCGCTCCCCGTTGGTTATCCACATCTTCTGGCCATTGATAACATATTCGTAACCCTTCTTCTCGGCTTTGGTCTTAATGCCCGCCACATCAGAGCCTGCGGAGGGCTCTGTCACACAGTAGGCACACATCATCGCTGCCCCGTCATCCTCCCCAAATACTTCTTTTTTTGTTGATCATTTGCCCCAAAGAATTTGCTTCAATACAGTTTGCACCCCTGTACACCCATACGCCAACTCTTCGGTAATTAAACAAGCATCGAGCGTTCCCAGGCCAAGACCACCGCAACTTTCTGGAATGTGTGCTCTGATCAAGCCAAGTTTGATGAGAGTGAATGGGTACTCCCCACTTTTGTCATATTCCGGGGCGACAGGGATAATCTCCTCTCTGGT…	TPPAPRWLSTSSGH**HIRNPSSRLWS*CPPHQSLRRALSHSRHTSSLPRHPPQILLFLLIICPKEFASIQFAPLYTHTPTLR*LNKHRAFPGQDHRNFLECVL*SSQV**E*MGTPHFCHIPGRQG*SPLW*TSGQLLETLSAVPSTQN*TLIRAPA*ETLLCVVFDTQNGKHFSGPCSFCERRCHDGSSICCLRPPLGSKPATVIFIKVCRGPPNVWLWVSSAAFISCSMKTL**QLGYATNL*ISEQSSFWDLAIKSVLSQIKKNSQFLLQHHA*LNDPLLPTMKIMD*TSEPX	3.62866	3.35241e+06	85	86	29.3333
EMBOSS_096_1	1	EMBOSS_096	ENSMUSG00000097284	ENSMUST00000180465	Medium	[G].KLCLQNPNGPTK.[H]	KLCLQNPNGPTK	ACCATAGAGTTTGGCGAGGCGTACTAGAGGGGCTACCTATTGCACCTCCCGGGTGGTTCGGGCTTAAGGTTAGCCAGGCTGAGGCTATGGGAGCTGCAGGTGGATACACAACCTTGGATCTGGTGTAGCTCTCCTTAGCCCAGAGACTTTTAAGTTAAACAAACGCCCAAGATACCTTTCTTTCACTAGAATATCAGCCGATTAACAAAAATGGTCCCAAAGCTCCGTGACACTGGACCCATTTTTAGGGCTAGAGATAGTCTTCTTAATCACTTTCTTCCCGCTCTTTAGCTCTGGGATGTCCTTTTTCTCCTGAAAATTCATATTCTGCCAGGTCCTTTAAAAAAAAAAATCGTTCCAACTCTCATCTGAAGCTCCGGCTGCCTTGGCTGCCAGTTT…	TIEFGEAY*RGYLLHLPGGSGLRLARLRLWELQVDTQPWIWCSSP*PRDF*VKQTPKIPFFH*NISRLTKMVPKLRDTGPIFRARDSLLNHFLPAL*LWDVLFLLKIHILPGPLKKKIVPTLI*SSGCLGCQFSICL*PFCFLEGEGRQRCKCLAMTALLQKILYGLREIDRAVGRMEEPEDGDERCEMLSSGQDTLTALMSSLQL*LPAQIQVIIPTGFQ*KAGPA*IWIKDLN*RCVLLPQGSE*EVSWP*LVFIITFYYSFCICSTSSTSAAFWLFAWRSDSHLHS*NLPEAPNSIFICH*YLKYHWVSWIIWC*W*SSSYNSLDLLKSLLCQV*LVFLGQW*TGRSNTPKGGKLCLQNPNGPTKHCTSFLVAGGTRCKNLSFTLEGISLYAYTTE…	0.868286	1.75798e+06	357	87	29
EMBOSS_187_3	3	EMBOSS_187	ENSMUSG00000097445	ENSMUST00000181462	Medium	[R].VEVFWGNQIL.[L]	VEVFWGNQIL	GGTCGCCATGACCGGTCCCGCCCCGCTCCGCCAGTGGCCAGACCGGCGCGGGGAAGAACGAATGACAAGACGTAACACGCCTTTAGAAAGATGGCGGCGCGCAGGCGCGGGTTTCCCTTGGCGCTTTCCGGCCGCCTGCTGCGGAGAGAGCATCAAGGTTCCGCCCTACCCGTCAGGAACTGGCCAGCCCAGGTCTTGCCTTTCAGAATTCTCTAAGAACAGGACATCAGCATGAGTCCCTGGGATGAGTCATCAAAATAATATCTGGAGGAACATGAAGAGTGTCTGGAGGAAACTAAAAAGCAACAGCATGGGTTTATTTTAAAATATTTTTTCTTCTTACTCCTCTTCCTCCTCCTCCTTCTTTTCTTCCTTTTTTTTTTTTTTTTTTTTTTTTGA…	SP*PVPPRSASGQTGAGKNE*QDVTRL*KDGGAQARVSLGAFRPPAAERASRFRPTRQELASPGLAFQNSLRTGHQHESLG*VIKIISGGT*RVSGGN*KATAWVYFKIFFLLTPLPPPPSFLPFFFFFFFLRQGFSV*P*LSGNCSVDQAGLKLRGLPASSFQVLGLKVCAITPWPILF*LTYLFYVYEYTVVVFRHTRRSHYRWLRATIWLLRIELRTSGKATSALNC*AISPVPQF*FLTRV*EVFW*GNQILLKVRVKLDHSRFHG*TNVEHADVHVEQV*CTSLKQQKSNLLKLPAASTFNLILFSCWSNTAVLLSHRPISRKQ*EACWDYGAPEVK*GCSLSTFKEGVSPFL*SLTTMPANQSQQRQIL*CLS*QGAAESRQRRAGCCTALFS…	12.1532	1.06341e+06	error	8	3.33333
EMBOSS_142_3	3	EMBOSS_142	ENSMUSG00000097876	ENSMUST00000180999	Medium	[P].FASFLNK.[Q]	FASFLNK	GGTCGAGGGGCGGAGCCTCGATGAGCTTTGAGGATTTTACTGTTTTGTTTTGTGCTGTGCTGTAATGTAGACAGATTTTATAAAAATCATCCCATGGTCGGAAGCTGTTCCGGCTCTCTCAGCACAGTGACTAGTCTGAGCAAGCTGCGAAACAAAGCAGACGGCGTCCGTCTTTCAGAGAATTATCATTAACGACTCTGGTGTGAAATTTGCTACAGCGTAACTGAAATCATGCACCAGTGTAGAAGCCACAGATACCAGGAAGATGCTCACAGATGACACTGTTCCAGGAGCGGAGCACCTCAGTGCTCTCCGCCAACACCCACTCACCAAAAGCCAGAAGGAGCCTGCACTTAATGGGCTCTATTAATTCAGGGAAAGTGATGCTTGATGTCCGGC…	SRGGASMSFEDFTVLFCAVL*CRQIL*KSSHGRKLFRLSQHSD*SEQAAKQSRRRPSFRELSLTTLV*NLLQRN*NHAPV*KPQIPGRCSQMTLFQERSTSVLSANTHSPKARRSLHLMGSINSGKVMLDVRLVDPGLDVDNLFPIII*HGRAVDFIWEGREGLRPSAPS*HVTLLSM*HFLACGHFLACEHFLACEHFLACGHFLACEHFLPCEHFLACGHFLACEHFLACGHFLACEHFLACGHFLACEHFLACGHFLACEHFLACEHFLACGHFLACEHFLACGHFLACGHFLACGHFLACEHFLACGHFLACGHFLACGHFLAYGHFLACDTS*HVDTS*HVDTS*HVDTLLSNHKLLVVFLK*GMTVRNKRKHFKSCWFCYRDTGNNPYSKQVH…	1.18069	118255730	error	21	7.66667
EMBOSS_086_1	1	EMBOSS_086	ENSMUSG00000097380	ENSMUST00000180679	Medium	[K].KIVNISEK.[N]	KIVNISEK	TTAACTGCTGAGCCATCTCTCCACCCCCTAGTTTAATTATTTTTAAAGACTTATTTAATTACTTATTTATGTATATGTATGTGTGTTTATGTGCATGCAAATGAATGACTTCAGAGGCCAGAAGAGAGCATGCCCCGGAGCTGGAGTAACAAGTGGTTGTGAGCTGCCCAACAAGCCTTAGCAACTAAACCCTGGACCTGCAAGCACTCTTACCCACTGACCTAGCTCTCTAGCCCCTTAATCATTACTACTTTGTCCCTTGGGACACTAGGATGAACCCAGGGCCTTGTACATAATAGATGATTCTCCTGTCTCAGCCTCCCAAGTCCTGGAATTACAGACCACTATACCCAACACCACTGGACATTTTGTTTGATAATTTATATTATTTTAATTTCA…	LTAEPSLHPLV*LFLKTYLITYLCICMCVYVHANE*LQRPEESMPRSWSNKWL*AAQQALATKPWTCKHSYPLT*LSSPLIITTLSLGTLG*TQGLVHNR*FSCLSLPSPGITDHYTQHHWTFCLIIYIILISFVYVFRKCLATS*TILS*THRNLSASASRALGLTQGFVYLCLLCWHQRHVPPPWLTCGLFLNFSFTTEKS**LKKIVNISEKNYFYLCAWVFCLQ*MYCMNVQDLWRPEEGTSLVLELLVVVSSHIGTGNKTQIQNKTVDPLLL**IILYK*CNSFSLVSPR*HRSLKMHVCRAKTKTL*I*STPFFISALFSCSIRVSVMVQILKCLLLLCVLMCGPYMPYVLVEVKGQRLGRQLFLSTIGSKD*TQVLRLGGQHFHGLSHLASQ…	1.56159	265167	208	69	23
EMBOSS_252_3	3	EMBOSS_252	ENSMUSG00000104667	ENSMUST00000197982	Medium	[R].LLSTGPTVGALL.[D]	LLSTGPTVGALL	GGCGTCCGGAACCCAGAGTCTCAGAAAAATGACAATTCGGATCGCTAGACTACAGGCCAGAGGTTGGGAGAGCTCGGCTCTTCCAAGGAGGACAGCAGTGGCAAGCCAGGTACAACATATAAATATAAAAAGAACATAAAAAGAACATAAAAAGCTTCAAAAAAGAAAAAACAAAAACAAAACCCAAAGAGGTCTTTAAAATTTTTCTGGAAGTATAAAACCATGAGAGTGCTCAGACCAAGGGTGATGCTGCAAGGCCAGAGGCAGCAGGAGGCAGACAAGCACAGCTTCTCTTCCAGAGCCTGCACCTAACAGTGTTTCTATCAGCAGCTGGATGCTCTACAGGGGAGCCACCCAAACGGCACTCTCCTTTGACAGGGAGGCGAAGAGGAAGCAGTC…	RPEPRVSEK*QFGSLDYRPEVGRARLFQGGQQWQARYNI*I*KEHKKNIKSFKKEKTKTKPKEVFKIFLEV*NHESAQTKGDAARPEAAGGRQAQLLFQSLHLTVFLSAAGCSTGEPPKRHSPLTGRRRGSSH*NSFFLPQTKEKNIVSPKLSWA*CPEPDIYPICPTQFLTKARRCPKF*GGGEEASVL*NRSLFEVIIGAVSCCLFVC*PVLPVAWLGAGLDDFSKA*EVLSLLSLLCQGRFCLVHQGLQVIVWLIRHLRELKPAWSLLCDLPELFQGPLFQLPDLSHGFIKAGHLGRQLLLFIASQRSPIRAGFHHFCFHLNRLLSTGPTVGA*LLDSVCVSQHVQHVFIGAYAW*DHSGHAGP*VLPSERGPQQLCQLALTERCMSLVLSQSPDT…	3.92778	1.39666e+07	error	29	10.3333
EMBOSS_145_2	2	EMBOSS_145	ENSMUSG00000096980	ENSMUST00000181075	Medium	[K].ETQNKKPK.[P]	ETQNKKPK	GAGGGGGAGGTAATCAGAATACTATTTTTATACAGTATTGAAAAAAATACATTTTTTTATTGTCTGAACTCACAATCACCACCCAGCAGTTCACGCCTGCTCTAGGTAGCACCCACATGAAGGCTATAGCATGAGCAAAGAACTAATCCGCAGGGAAGCAAGCTGCAGGGCCAGCAGAAACCCTCCTAATCACACAGAGGACAGCAGGCCACGTAAGCAGGTACACAGCACACAGCTAAAGCCACCTTTCAACAAGCCAGGGTGCCAGAGGACATGAACCAACCCCAGCACTACAAAACTGCATGTTCCCCAAAGAAACCTTTTGCTTCATGCCCGTAATTAACATAAAATAAGTAAATTATTTGTCTTTGTATTTAGGAAAATAATCACGCTAAAAGT…	RGR*SEYYFYTVLKKIHFFIV*THNHHPAVHACSR*HPHEGYSMSKELIRREASCRASRNPPNHTEDSRPRKQVHSTQLKPPFNKPGCQRT*TNPSTTKLHVPQRNLLLHARN*HKISKLFVFVFRKIITLKVVLYMDFQRKD*LCFLN*KKKIGVFQPH*LNPCGI*HF*TKNTHQKKG*SSGTFKMSSGLTIGYFYCSGFVKKNTEQSCCLHCLQIPSRVRSETAGHTGWQLAGSMGQAPQAI*LAVTLEGQSVPSTCLRNNSRK*FFPTSGHFGTKTSVCFSCYPLQI*DVLGLRRPIYPLP*AVGSFQEN*GWRSRVAQGLKQWGQSSST*WSTEPCPGRRLSLGR*KLNL*PV*VQFTQIKKKETQNKKPKPRPVSQLSPGNGSTGPVLGSDVT…	8.1879	930599	369	117	39.3333
EMBOSS_099_3	3	EMBOSS_099	ENSMUSG00000073164	ENSMUST00000149246	Medium	[R].LLAGHQAPAELIHQVYSHNSIKR.[V]	LLAGHQAPAELIHQVYSHNSIKR	GCGCGCCCGCGTGTGGGCTCCTTTGCAGAGGACTCGGTAGCTGCAGCTCCCGGAGCACAGCGGACAGAGCTGCGGGCTGCGTGCGCCCCTGCTGCCACCGGGCCTGCCGCGGTGGCTCCCGCGCCCCGCGGCGACTTCCGCTCCCGCGCTTCTCTTTGTTCAAGTCCCCGAGCGGCGGCGGGGTCGGAGCCCGCGCCTTGGGCGACTGAGGCGGCCGCAGTCCGCGCCCCGGCGCCCTGGCGATGCCGGACCAGATCTCTGTGTCGGAATTCGTGGCCGAGACCCTTGAGGACTACAAGGCGCCCACTGCCTCTAGCTTCACGCGCACGGCCCAGTGCCGGAACACCGCGGCGGCCATCGAGGAGGCTACACTTGGGAAAACCATCATATTGAAAGACA…	QPGPPLSAGGVQDSGLVARSSP*LCAPACGLLCRGLGSCSSRSTADRAAGCVRPCCHRACRGGSRAPRRLPLPRFSLFKSPSGGGVGARALGD*GGRSPRPGALAMPDQISVSEFVAETLEDYKAPTASSFTRTAQCRNTAAAIEEDAVTYDDVHVNFTREEWNLLHPSQKSLYKDVMLETYWNLTVIGYTWENHHIERHCQSSRRNERFSLHCQLP*ASRTASWVLRCCRTCGNTGSSLTMSFRSGRRTPSMTVPLAT*LWTILRSRPTSSPTETPPRSLNMSSTPLSPTVTSPSTSECSSLL*A*PLGASWNRRSSGPSACLT*TAMATSASVKCWS*CRYLHLTGPGTWGVQASRTPIPSPIHQVIPLPSCYLVY*RTACLCTE*Q*KPSIYRLLA…	8.10613	543312	397	243	81.6667
EMBOSS_082_1	1	EMBOSS_082	ENSMUSG00000097658	ENSMUST00000180595	Medium	[I].GVSRLCPDPR.[T]	GVSRLCPDPR	ACAGTAGGTCCATCCTGTCCCTCTCAGGAGACTTCGGACACTCGCGTCACTAGCTGTTGCTCCCACCACAGCAGCTGGGAGTGAATCGGGGTGAGCAGGCTTTGCCCGGATCCCAGAACTCTAGTCCGCTTTGCCTCTGTCAGGCGGACGGTGAAGTGTGTCCGCTCTTTCTGTTTGGGGACGTCTTCCTCCTCGGCCGCCTTAGGGTGTGGAAACAAAGATGAGCCACACCAGGCAGATCTTTCACAGGACCTCTCCCCGGAACAAGACATACTCTGTGCCTCCCTTTGCCATCCTCTACGGCGGTGTCCCTGTGTGCTTTTGGAATTTGTGAGACAGAGTCTACTCTGTGTAGCCCTGGATATCCTGGAACTTGTCCTGTAGACCAGGCTGGCCTCA…	TVGPSCPSQETSDTRVTSCCSHHSSWE*IGVSRLCPDPRTLVRFASVRRTVKCVRSFCLGTSSSSAALGCGNKDEPHQADLSQDLSPEQDILCASLCHPLRRCPCVLLEFVRQSLLCVALDILELVL*TRLASTQICLLLPPECWD*RCASLLPGSFYIS*RL*LMGLGRCLSCKFEDLKWIPGAHEKEMRHSSLCL*PSTDKEHNRTQGPTGYPA*PYQQVPGRGKERV*K*GCVPPLPGFSHSKFKYPLEGWRDGSAVKSTDCSSEGREFKSQQPHGGLQPSLMRSDSLFWKCLKTATVYLHIINK*IF	0.968146	7.62688e+06	30	221	73.6667
EMBOSS_355_3	3	EMBOSS_355	ENSMUSG00000100691	ENSMUST00000191396	Medium	[R].QLSMLTALAQDPGSVNYSRVP.[D]	QLSMLTALAQDPGSVNYSRVP	AGCTGCCGAGTGTGCTCCCGCGGGAATGGGAGGCTGGGCTTTGCCACGAGACAGCCGAGGCTGGTCGGAGACAGCCGAGCACGGCCGTCGGAGGCTCACGAAAACACTAGAAAGCGGAAGGGTCGGGAACGCATTCGGTCCGAAGCTGGGCTCGGTGGACTTGGGACTCTGAGATACCCGAGCCATTCCGGAAGCAGCAGAACGTGCCATAACAGGGGTTTGTTTGTGTTTTTTACGAAGTCGTGAACCTGCCAGACCGCGGAATGTGTCTGGGAGGAACCGAACGACCTCAACTCCAGGCCTTGGGAGTTGACTCGGAGGCCGCCGATAGCTTCCGGAAATTGCCGAAGGTCCACTGGACGAGCTCGGCAGCTGTACCCTCAATGGAGAGCCGCTGGT…	LPSVLPREWEAGLCHETAEAGRRQPSTAVGGSRKH*KAEGSGTHSVRSWARWTWDSEIPEPFRKQQNVP*QGFVCVFYEVVNLPDRGMCLGGTERPQLQALGVDSEAADSFRKLPKVHWTSSAAVPSMESRWWKEWKAKALP*QP*ASGNSRSVSGPTRARMRLISVRKRDCFRKYGQTLARRREPEVAELVRLISEGFIYLF*LTAKTRVENWDGGVAARVRQLSMLTALAQDPGSVNYSRV*PDWN*KQEL*RPAFWIFPF*DFVFFFMFNCAPCEYLVSVEVRRDIGCSRT*VTAVSCHVGAGNTTWVL*KSSQCF*SLIPLALLFETGSCYX	2.41704	8.6968e+06	error	26	9.33333
EMBOSS_350_2	2	EMBOSS_350	ENSMUSG00000113559	ENSMUST00000221856	Medium	[V].ICNNIR.[E]	ICNNIR	GGGGAGACGGGCCTCGCAGGGGGGCCCTCTGGCCATTTCCCTGGACCGCAGTTACTAGGGTGCTCTGTCTTTGTGTAGAGCATTCTCTAGCAAAATGTCCAGGGTGTGTGGACCACCTGGGGATCTCCATTCCCACACACAGCATCCTCTCCCACTGAGGCCAGACATGGCAGTCCATTAAGGGAACAGATTCCAAAGATAGGCAGCAGCTTTATGGCCAGTCAGTGCTACAGTTATTGGAGGACCCTCATGAAGACTGAGCTGCATATCTGCTACCTACATGTCAGGGGCCTTAGTCCAGCCTGTGTATCCTATTTGGATGCAGTGACTTATGATGCTGTGCATGTGAACTTTACTGGGGAAGAGTAGAATTTGCTGGATCCTTCCTAGAAGAGTCTC…	GRRASQGGPLAISLDRSY*GALSLCRAFSSKMSRVCGPPGDLHSHTQHPLPLRPDMAVH*GNRFQR*AAALWPVSATVIGGPS*RLSCISATYMSGALVQPVYPIWMQ*LMMLCM*TLLGKSRICWILPRRVSTKM*CRKPTWTSLL*ATLGKTIILKDIVKVPEDMKGNLHVQADTHRPLRKF*YVLEALKKSKSAGQWWRTPLITALGRKKQADF*VQDQPGLQNM*DIAEERNPMNVLNVVKPFHFPVISNIIKEDILERSLMNVINVLKPLQITLSSKAIKEHILERNLKNTINV*NLFTRETSPKTKEDILQRDLMNITNVVKAFSQSSCL*KHKRTHIGQKLYECNQCAKAFAYLSSLQNISDPILERNVMNVINV*RPFTTL*SPVV*KEFL…	3.95343	3.53239e+06	423	95	32
EMBOSS_328_1	1	EMBOSS_328	ENSMUSG00000113529	ENSMUST00000222984	Medium	[G].AGWRVAFSGAEDLQLPK.[H]	AGWRVAFSGAEDLQLPK	CAGGAAGTTTGGCCGCCCCCCATCAACATACCCACTCGCTTTCTTCTCCGCCCGCGGGTGTTTCTCAGGAGGAGGCGCTGACTCTTGGGCCGCTGCTTGAGAGCGATCCTTCGCTCCCCGCTACATACACACGCATACACAGCCCGAGACACACACAGGGTTCCCTCCCGGCCGAGGAACCGCAGCGCCCCGTCCCCTCCTGTCTGCCCTTCAGGGTTCTCAGGTCCGCGAAATCTGAAACCAGGTCAGTGCAGTCTAGCCGTGACGTCACTGCCTTCCCGCTGAGCGGAGCTGTTCAGCAGGGGCCGCGGCGGCTGGGATGGGTGAGACGGCGCGGGGTGGAGGGTAGCTTTCTCCGGAGCTGAGGACCTGTGACAGCTCCCGAAACACCAAAAGCCC…	QEVWPPPINIPTRFLLRPRVFLRRRR*LLGRCLRAILRSPLHTHAYTARDTHRVPSRPRNRSAPSPPVCPSGFSGPRNLKPGQCSLAVTSLPSR*AELFSRGRGGWDG*DGAGWRVAFSGAEDL*QLPKHQKPMKST*NVHGPKRDLEIKPCIAPRTGCEFRHTYSVRNI*EFSRDLGCTD*GLR*LSSKLDNSSC*NFRV*LHET*DLQWWHTPVTPAIPVLQEFPVNEGYIVETLSKKTKNNNNNKT*CGVEE*GTKDSACEI*CSLKALIFKLEISQESG*ARES*FWYKMFREKTFPRYSLSCALRSMTVIPFEDGHDKDNWPTQYLGQKSWGGKEMFTRS*NPKI*ERIKKQRFTSYHYMKR*RTVQKEKLGSRESM*NKVRTLQNLI*WLLIC…	1.04946	1.05598e+07	error	320	106.667
EMBOSS_291_2	2	EMBOSS_291	ENSMUSG00000115871	ENSMUST00000231018	Medium	[P].VLLQAEQKTHK.[L]	VLLQAEQKTHK	TTTCTGTTTCCAAGATGCCTTTCCAGACTAGAACCCAGACATGTGAGCCACTGGCCAGACACAACATCTGGTGCCCACATGGGACTGAGAAATGGCAGAGGACATTTGGAAAAACACTGCTGTTTTGGAGTTCCATAGAAGAAGAGAATAATTAAAGGAAGTTCATACCAGAGAAGGTTTCCAAGATGCCTTTCCAGACTAGAACCCAGACATGTGAGCCACTGGCCAGACACAACAGTGCTGGAGGAGCTGAGAATTCTTATTGACCTGAAGGCTGCTAGAAGAAGACCGGCAGCTAGGAGGAGAGTTTCAAATCCCACCAATGTTGACACACTTCCTCAAACAAGGCTCCATCTACTCCAACAAGACCGCATACCTGCTAATATTGCTACTCTCTGG…	FCFQDAFPD*NPDM*ATGQTQHLVPTWD*EMAEDIWKNTAVLEFHRRRE*LKEVHTREGFQDAFPD*NPDM*ATGQTQQCWRS*EFLLT*RLLEEDRQLGGEFQIPPMLTHFLKQGSIYSNKTAYLLILLLSGPNFFKPPQGHSGIMVDDFVVSSQLIL*PEDKPCRSSLMANSYFWLLANHMKVLWRETLGQTNTEKGMEQLQMIL*G*IAEIRAFSASHLCSRRSECHLGRLATVQDLEDSAWILPV*TPEHQRHQGSNQPSHPGEMSEATP*WSLSLSSW*LAIYPVVKIRQNLGLFPISPHPAFQLREH*RDSFLLLFIPSIYSFSAQESTL*FQYIELGDTGSVRTLQGTEG*LWFLEYVSYPKCLDFLNLKILCIFMESMEKMEAPMQIHKPE…	0.986698	3.34999e+06	768	15	5.33333
EMBOSS_240_2	2	EMBOSS_240	ENSMUSG00000097928	ENSMUST00000181702	Medium	[P].AAAAAALRSAPAAGAAR.[S]	AAAAAALRSAPAAGAAR	GCACTCAATCAGGGCGATCCTAGGCTCGCACGGCGGCTGTCCACCGTTTCCCTCCGCCCACCGCGCCGACGCCCGGGCGCCCACGCCACCCTTTCCCCGACCACCCTCTGCGCAGCCCGGGCCCAAGCGGCGGGACGCAGGCTCTCGGACCCGGAGCCGGTTCCCGCTTCTCTCGCTAGAGGGCAGACGGGGCCCGCTCAAAGCCCTCAGACCGAAGGGCACGCGCAGCCGGTAGAGATCCCGCAATCGGAGCCGCACTCCGGGGCTGGGCTCCGCGACCAACGTGGGGTCCGAGATCAGAGCCCGGGAGCGCGACGCACGGCAGACCCAGAGGACCCGGGAGGAACGGCCAGCAATCTCGGGGTGCGCACAGCGCACGGGCACCAGGTGGAGGCGGCG…	HSIRAILGSHGGCPPFPSAHRADARAPTPPFPRPPSAQPGPKRRDAGSRTRSRFPLLSLEGRRGPLKALRPKGTRSR*RSRNRSRTPGLGSATNVGSEIRARERDARQTQRTREERPAISGCAQRTGTRWRRRRHGSSGTRLGAKRAARGHTGRG*VPAWEQRSGWHSPGLGSPSAGAGFPRDPRSFFLPFPLPLPSLRSDISLKMSALRGPGWATVTRDKFGPRACRKVCPGREEPVAGLRGGVACRLQGAAWTRSPGAPATSGGVSGLLLCPGSCRCRLWSGLAPVAVSLPYSPKRERCSQSGLCSHLPAAAAAALRSAPAAGAARSSHKFWGSPSRLFFNCPQVGRRRLLRTLPLASPPPSFPTTPPPRGADTPPGGA*AGRSRLSPFLLAAGPA*…	1.41752	1.20683e+06	312	617	206
EMBOSS_396_3	3	EMBOSS_396	ENSMUSG00000100454	ENSMUST00000188810	Medium	[R].QVFQGRKVEV.[T]	QVFQGRKVEV	CCCTCTCATGTGGACGCGGTGGCCGGTGGTGCTCTGCACTGTGAACTCGCTGTCTCCATATCTGTGGTCATACATTCCTGAGAGACAATAGCTGAGGTCTCTCCCAAACAGGTCAGTGGTGAAGCCATAGCCATCACTGAGGCCACTGTATTCTTCATAGCCCCCATAGCCTGCACTATAGGCACCAGACCTCATCCTATCCAGACCTGCCTGTTTCACAATGCCAATGTACCTCCGGGCTGTGCCAGGCCTGTCATAAGGCCCAGGCCTTTGCACAGACATAAACTTCAGAGGTGGATCTGAGTATGATCTAACTTCCTCCTGACTGCTCTTAAACACTTCAATATACCTGTGCCCTATTCTCTCCTTGTGCTTCCCTAAAGCTTTCTCAGCTAACTC…	LSCGRGGRWCSAL*TRCLHICGHTFLRDNS*GLSQTGQW*SHSHH*GHCILHSPHSLHYRHQTSSYPDLPVSQCQCTSGLCQACHKAQAFAQT*TSEVDLSMI*LPPDCS*TLQYTCALFSPCASLKLSQLTLVR*QVFQGRKVEVTSIFSKERGLLX	67.54	231158	137	8	3.33333
EMBOSS_076_2	2	EMBOSS_076	ENSMUSG00000091514	ENSMUST00000167899	Medium	[R].FILMDAAGKAVPAQ.[A]	FILMDAAGKAVPAQ	AGACGTCGGGCGCCGGGCACGCGCCGGGCACGCGCTAGGGGCGTGGGGGACACGCACGGGAGGCCTTGCCTGCGCTGAGGCTTTGAAGGAGGAAAATCGGACCTTCTGACCCCTCATGGGTCCCGGCAACCCCGGTGGGCAGGACTGGGGTGACTGAAGGCTCTGTCTGTCTGTCTGTCCTCCATTCCCTCCCTCTATTTGGATTGAGAGGCTGTCAAAGTTATCCCTAAAGCCTAAGAGATCTGACAAGCAGCAGCCTACAGACACCTTGGCTTGCGTAAGGAGAGGTCTACTTGGCAATACTGACAACTCCAGTTTCCTATTCTGTTCAGTCATCTGAGAACCGGAAAGAATCTTGTCACTGCTGCTTTCATTCCTCTGCCGGCTTTTCCAGTTTTT…	DVGRRARAGHALGAWGTRTGGLACAEALKEENRTF*PLMGPGNPGGQDWGD*RLCLSVCPPFPPSIWIERLSKLSLKPKRSDKQQPTDTLACVRRGLLGNTDNSSFLFCSVI*EPERILSLLLSFLCRLFQFFPPFKF*VRRKLECVASCHNRRFKRWELTKLKSSLAKSVTGSPAFQVIS*SLFF*FFQYGLDLTNSFFPGLTDRVLAPSFNRIQF*KFLCQHFFQKPIRFVCLFSYKLFYFLLKKLHLLQHMYDLFNTWRSALI*RETLFWEIITRNLVAGMLAAGITI*LRLSTILDLRIQKV*VVIVHCSRRFILMDAAGKAVPAQALTRWVVGVRGVLEMGRQKGDRSCLSGKLSTSDMSVCIVYQPGKN*KDFHRTIRDQHC*TTKGEPFEAG…	5.85835	4.85018e+07	317	116	39
EMBOSS_176_3	3	EMBOSS_176	ENSMUSG00000101966	ENSMUST00000186108	Medium	[L].VCDTFAQLLNSESSVNSK.[N]	VCDTFAQLLNSESSVNSK	GCGAATAACAATTTTTATTTGTCCTGTTATTTCTCCAGTTAGGGAAGTAAGTAGAAAGTAACATTTAGTTGAAATCAAATATCAATATAGTATCATTTCTTTGCCACACATTATCTTCTAATATAGTACATATTATTAGTGCCATAGATAATCAAGAGGGTAGGCTTCTGCAAAATGTTAATTGTATTACAGAAAGAGAAAGAAAAATGGGACTCAAGTGGGTATCTTTTTATAATATTGCCCAATGATTTCTCATTTGGGAAAATATGAGCATTGTGATAAGAAAATGGATGGCAAAAAACCTAAGTTGAAAAGTAGACAGGCATGGTGTTGGAGCAGTAGCTGAGAGCTTTACCCCTACGGTTCCCTGGCTAAGGCTATGCCACAGTACAACTAGTA…	E*QFLFVLLFLQLGK*VESNI*LKSNINIVSFLCHTLSSNIVHIISAIDNQEGRLLQNVNCITERERKMGLKWVSFYNIAQ*FLIWENMSIVIRKWMAKNLS*KVDRHGVGAVAESFTPTVPWLRLCHSTTSNVSKNTKQQIFAIHFLITCFLLSFSPHSENLYSLPRSCCCCCCCCCCCSCWF*CGCCCHCLQLLFFFPLEQ*DPHRVHSTSSCWPDLPLMSILYHALFQKISKLTVDHTFLIASYSVSSVLVVHTNNPCHPSRFVTSIVMSNTPLI*SSQNLLKEILFHFHCIEAFCF*F*KEWRRGKIFRNTCLDKNWAMELIFSSKDRFPKPYVVYTFHAFLLWLMNQFS*FYFFSP*SLSKYV*NVGKAPLC*HLQDLRITSVGKHCSLCL*TS…	3.29105	4.9479e+06	error	175	59
EMBOSS_360_2	2	EMBOSS_360	ENSMUSG00000110605	ENSMUST00000212145	Medium	[R].HLCLLQEIHMW.[A]	HLCLLQEIHMW	TTGAATGGTCCTGTGTGCTGTGTTCTCTGTCCTGCCTCTGGATGCTGTGGAGGGTGCTCAGGCAAGCTCCGAAGTTGCGACATGGATGCATTGACCTATGATGATGTGCATGTGAACTTCACTCGAGAAGAATGGGCTTTGCTGAATCCTACACAGAGGAATCTCTACAAAGTTGTGATGTTGGAGATCTACAGGAACCTCAAAGCTGTAGGATACAATTGGGAAGACCAAAACACTGAAGAACATTGTCAAAGTTCCAGAAGACATGGAAGGTATATCCTGTGTCACAATGGATACAAGCCATGTGAGCATAGGGATATTGAAAGAAGCAGAACCTTCTCTCTCTCTCAAAACAATTAAAATATATGTAATAGTCCACATTTGAGCAAACTTTGTGAT…	SCVLCSLSCLWMLWRVLRQAPKLRHASKPRG*YLWRYVSARSSAIKLPHVFASRRSLMILWVRAIS*LEWGYPHGGLSFGGSTKICVTPRNPEDPLEALQQKRPAVQAHGPGVLGPTSEMASATLHRHLPHHHHIPQRPRDGRRRGAGPAGFTSALTRFPESGCTRVTAPTSPTPDPGPRCCRQTDRKKKKRLWEWPARSTASSLAASDTCLIIFPFPLHPTCPSPGFGSSRVPLVSRKSAFTLRCQWPSWAPFAAPCVLSGGSALSCWQ*VCSKFHRGRHLPTWGFSCPR*GASVSLTARL**WSHLCGDKKCPNNLTKIIKNYRS*KKTG*VGKKVQRKKNKRKKRMKKTDVYRGLERSELRL*ERAKLQQTQER*MTVTNREVNSKEK*RREREAR…	3.12889	128473	1231	5	2
EMBOSS_168_1	1	EMBOSS_168	ENSMUSG00000097532	ENSMUST00000181809	Medium	[L].LAGTTVSQLGSFPAHR.[D]	LAGTTVSQLGSFPAHR	AGAGTTGTGGGGAGGACGGACTGAGGGCCAAAGCATGTCCTCCCTCCCTGGGTGCATGAGTTTGGCTGCAGCGCCAGCTGCAGCTGACTCTGCAGAGATTGCTGAGCTGCAGCAGGCGGTGGTTGAAGAGCTGGGTATCTCTATGGAGGAACTTCGTCAGTACATTGATGAGGAACTGGAAAAGATGGACTGTATACAGCAGCGCAAGAAGCAGCTCGCAGAGCTGGAGACGTGGGTACTACAGAAAGAGTCTGAAGTGGCTTATGTTGATCGGCTGTTTGATGATGCATCCAGGTAGGGATTCCAGGAAGCAGAAGTAAATGTCCATCTGTGTCCTCCTTGGAGTGACTGTTGTTGTCATTGTCCTAAGCACTTTATACTTTGGCGACTTCAGTCAGG…	RVVGRTD*GPKHVLPPWVHEFGCSASCS*LCRDC*AAAGGG*RAGYLYGGTSSVH**GTGKDGLYTAAQEAARRAGDVGTTERV*SGLC*SAV**CIQVGIPGSRSKCPSVSSLE*LLLSLS*ALYTLATSVRWGLTLPLSL*CRVATQHFFPVGSCYVISSS*VKGLNSLVFLLD*PSFLRSPESEDCRVAVFSVFLRQNPNT*ILLACNLQRSADFCLLRAAMK*S*LMLVELIGVS*VTECGLEFAP*S*LMDNPVFLYFECWDYSCGPPCPVYFVFGLSIRAKQSFASSATSSASVIFNCETLKFIIPP*YMFQITSAI*DFGLLKD*LKIDAAIHYIDDIWLDSQRPNYLCLFTGEIKGIFHNTQQNEVAI*SCLLSSQSHIDNKYWIFLFL**…	6.85695	6.13334e+06	error	35	11.6667
EMBOSS_292_3	3	EMBOSS_292	ENSMUSG00000101722	ENSMUST00000187121	Medium	[-].SILSTLQMLQII.[Q]	SILSTLQMLQII	AGTCGATTCTTTCTACTCTCCAGATGTTACAAATAATACAGCCAAAACAGTTTACAAGTGCGACAAAGGACATCAAGAGCACCAGAAGGAGGGCGTCAGAAAGCCTCTGGGGACAGGAATCTCCCTGCGTTGCAGACACTTCTCCAAGAACTGCTTGAGACGTATGAAAGAGCCCATCTGTCCTGAGCTCGTGATGGCCTCAATTCTGGGCAAGTAGTCCTCTTGGATGAAAAGTATCATCTTCCAGAACTGGACCTGGTTCTGCTTCATGAGGGCGTTCCCACACACCTCCAAAAAGTCAAACAGGAGAGTGGCTGTTACACCTGAGAGAGGCTCCATGTTTAAGATCTGTGCCAACCAGCGCCAGCCATGATTTAAGCCATGAGGATGAACCTCCTG…	SILSTLQMLQIIQPKQFTSATKDIKSTRRRASESLWGQESPCVADTSPRTA*DV*KSPSVLSS*WPQFWASSPLG*KVSSSRTGPGSAS*GRSHTPPKSQTGEWLLHLREAPCLRSVPTSASHDLSHEDEPPAGLHMATGAG*WRHTNGSSQTCVSESFPAAQPWNPQLDSQASVDNPPKPSLP*KLGRKERSMDTSCGDEQE*GLPLWGGASRYQKPPPQWGMPLRGERPLPSPLVSQISLPVCTGQSPAPEG*E*QTRNALQIGQAFPRADCGAYQRPPSALNLRCRRSGSLEWWLPSANPSLSFSSDCPCCWSGPQRPTHIWRKHPEVAGTTAVYYLVPSPAGLHSANLLGLGWVQSSGWELLAPAASVTPAA*LGPLPPRSSSSLQRLW*SPAPN…	2.49835	525294	1	24	8.66667
EMBOSS_186_3	3	EMBOSS_186	ENSMUSG00000097458	ENSMUST00000180898	Medium	[A].QLDIRQR.[S]	QLDIRQR	AGGGTTAGGGCCGGCGGTTTTGCAGCTCACCTGGGGAGGCCAGCAGCACCTTCGCCCCGCAGCATTGAAAGCAGTGCAGCAGAGACTTGGCACGAATGTTGTAGTTGAGGCACGCCATGGGACAGCCCAGTTTGAGCAGTCCCAGCCAGATCCACACGTAGGCCGGCTCATTGCCCATGAAGAGGGCTACGCAATCCCCCTGTCGTAGGCCCAGTTGATCGTGCAGCGCCCGCGCCACTTGGTTGCTGCGCCGGTCCACCTGGGCGTAGGTGAGCGTCTCGTCTCGGAACAGCAGGAAGGGCTTGTGTGGGGTCTTGCGCGCTTGTTCCAGGAAGGCCCGCAGGATGGTACGCACGGGTCGCCGCTGCCGGTAGCTGCGCACCCGCCGGGCCATGTTGG…	G*GRRFCSSPGEASSTFAPQH*KQCSRDLARML*LRHAMGQPSLSSPSQIHT*AGSLPMKRATQSPCRRPS*SCSARATWLLRRSTWA*VSVSSRNSRKGLCGVLRACSRKARRMVRTGRRCR*LRTRRAMLASRRKYRTSWRR*GQQQVNVATTSIKEASLYSEWKAQLDIRQRSVVGGGQTATSAARHLHL*LRGHSRGDLKD*KSWNIRESAERLSFQNAENKTPM*LSCSAPMNIPKELHILQRYLFTVTTALFTNHKEMEAA*MPIHSENVVHIHNGILFSYKDKRLPILFKEASLYTNADRYRAPQLDIRGRQWFPGTRVPVGRASSQLLHLWPRKHRGRGGGKTTRKSAMRLSLIEMAAQTGPEQRAVSGEMVTWKPVISCRSFPRQRPTDN…	6.23305	3.76419e+07	169	96	32.6667
EMBOSS_113_3	3	EMBOSS_113	ENSMUSG00000021268	ENSMUST00000146701	Medium	[I].KPTLQLR.[E]	KPTLQLR	GACTTTTGGTAAATCACCTTTTGCCGTTTCCTTTGTCCCCGTGAAGCCCCCCCTGGCCGCCCCCTCCTCATTCTGGGCTGGCTGGCTGAGGGGGGGGGCAGCCTGAGGGCTGCGACGTGGCAGGTTTCTAGAATGTTCTATTGATGGCCGCAAGAGGGCGCTGGTGGCACTGCGGAATTTTGGGGGGCGGGGTGGGGAGGGAAGAGGAGGTGGCCTTTGTTCTCCTGCAGGAGGGGGTCGGGAGCGAGATGGGTTGCGGGACCATGGGTTCATTTACCTATGGGGAAATGTTAGTAGATACCTGGATTCACTAAGGTGCGCTTGCAGGACTTACAATAGGTCAGAGATGGCGTCATCTGCAGTGGCTGTGTGATTTAGGGTGTCATGGACGCAGATTAA…	KARLSTPQSASEDQTT*LTRKCLVNRPEIAKKKSLISQ*GCPYCPAASPSLSQQ*APSRCWVSLCSTNNFQNSNKQTNKQTTFIQQTFSETLTMCPVHQAMAEVQRQ*EQSLFGG*LVLSFLPALSLAF*TNHFCPDKTKKKKKTKTKNKTKQKTQKNKKQNNWVALGKPGLEWTMVSRPLKGADWIMRQMEAEGARRRQMQWAETRSELIRLIEGTFSVLPSGPGGLSLVHCCVHMETGATLVPLWQLFIHLMLTTPCPDPGPACHHAGKQRSPSGFRRGPPT*R*PRGLFGFSSSGHEPVSSLHPPVPLGTPGSTVLTWSPASPPPPVLLPRHSSVCLSFTAPASRGLSTLAAFLPHLQFPLQPTAS*LALLHRTALAQACRVFLCHLLLCSGSTSC…	6.90162	2.22058e+06	1920	133	45
EMBOSS_007_1	1	EMBOSS_007	ENSMUSG00000078308	ENSMUST00000089534	Medium	[K].TDLQKMAKQMSFF.[L]	TDLQKMAKQMSFF	AAATAATTGTATATCCATGTCTACACCCAAGACATGGAACTAGCCTAGAGTCCATCAATAGAGGAACAAATAAAGAAAATTGGGTGCATATACGCAATGGAATTTAAGGCTGCTCTGGAGAACAAAGCTATCACTGGTGAACTCAGGATGCATTGACTGCAGTGCAGAAGAGAACTCAGGATGCATTGACTGCAGTGCAGAAGAGAACTCAGGATGCATTGACTGCAGTGCAGAAGAGAACTCAGGATGCATTGTCTGCAGTGCAGGAGAGAACTCAGGATGCATTGACTGCAGTGCAGAAGAGAACTCAGGATGCATTGTCTGCAGTGCAGGAGAGAACTCAGGATGCATTGTCTGCAGTGCAGAAGAGAACTCAGGATGCATTGTCTGCAGTGCAGG…	K*LYIHVYTQDMELA*SPSIEEQIKKIGCIYAMEFKAALENKAITGELRMH*LQCRRELRMH*LQCRRELRMH*LQCRRELRMHCLQCRRELRMH*LQCRRELRMHCLQCRRELRMHCLQCRRELRMHCLQCRRELRMHCLQCRRELRMHCLQCRRELRMHCLQCRRELRMHCLQCRRELRMH*LQCRRELRMHCLQCRRELRMHCLQCRRELRMHCLQCRRELRMHCLQCRRELRMHCLQCRRELRMHCLQCRRELRMHCLQCRRELRMH*LQCRRELRMHCLQCRRELRMH*LQCRRELRMHCLQCRRELRMH*LQCRRELRMHYLQCRREDISFLGRCAATLLMVFKRVGRAP*APPVIMGLWAGNCEEDAQC*GLSWDRDSSATEGLSLALSVLV…	1.16787	678438	error	17	5.66667
[truncated: 23,622 more rows]
